# Supplementary material for: Multiscale network modeling reveals the gene regulatory landscape driving cancer prognosis in 32 cancer types
Source: Genome Res. 2023 Oct;33(10):1806–17. doi: 10.1101/gr.278063.123 (PMC10691533; doi:10.1101/gr.278063.123)
Supplement: Supplement 8 [file Supplemental_Table_S2.xlsx]

## Sheet: Supplemental_Table_S2
Supplemental Table S2. Pan-cancer prognostic modules
Module	Cancer	Layer	Size	Parent	Hub	Function	Hazard_ratio	Survival_p
M830	ACC	4	165	M183	EXO1,NEK2,BUB1B,CDK1,CKAP2L,KIF11	ORGANELLE_FISSION	17.1564	6.18141e-06
M1551	ACC	5	84	M830	EXO1,NEK2,CDK1	MITOTIC_NUCLEAR_DIVISION	10.8993	1.4358e-05
M1877	ACC	6	79	M1551	EXO1,NEK2,CDK1	MITOTIC_NUCLEAR_DIVISION	10.8993	1.4358e-05
M1874	ACC	6	22	M1550	BUB1B	CYTIDINE_TO_URIDINE_EDITING	11.1952	1.52784e-05
M1562	ACC	5	23	M836	UBE2S	PROTEIN_PEPTIDYL_PROLYL_ISOMERIZATION	11.1832	1.54646e-05
M1552	ACC	5	36	M830	KIF11	ORGANELLE_FISSION	10.6207	1.86632e-05
M1247	ACC	5	33	M579	SGPP2	NA	0.0705188	1.91761e-05
M1547	ACC	5	10	M829	RECQL4	NA	10.5031	1.91895e-05
M1879	ACC	6	24	M1552	KIF11	ORGANELLE_FISSION	10.5685	1.94481e-05
M605	ACC	4	35	M133	SPNS3	NA	0.094838	2.72633e-05
M1973	ACC	7	36	M1872	CDCA5	DNA_DEPENDENT_DNA_REPLICATION	9.99559	2.88263e-05
M1979	ACC	7	10	M1887		NA	13.122	3.18535e-05
M1277	ACC	5	11	M605	C1orf88	NA	0.102002	3.22331e-05
M346	ACC	4	12	M63	CBX2,ZIC5	NA	13.0312	3.35864e-05
M361	ACC	4	43	M67	CABC1,QSOX2,CTSA	NA	0.0456775	3.46663e-05
M1975	ACC	7	12	M1877	CDCA2	DNA_REPLICATION	7.98413	4.1139e-05
M183	ACC	3	732	M7	KIF2C,KIF4A,CDCA8,TROAP,NEK2,CDCA5,EXO1,CDK1,BUB1B,CKAP2L,HJURP,UHRF1,FBXO5,RNF180,UBE2S,KIF11,NR3C2,DNMT1,SGOL1,CEP55,MCM6,FOXM1,KIFC1,EME1,GINS2,HNRNPM,UBE2C,MKI67,SSRP1,DEPDC1,AURKB,NCAPH,RACGAP1,RRP1,BUB1,ANLN,KIF23,CDCA3,CENPI	CHROMOSOME_SEGREGATION	7.96692	4.12525e-05
M7	ACC	2	1292	M1	ILF2,KIF2C,KIF4A,CDCA8,PDIA6,TROAP,NEK2,TNRC6A,IMMT,CDCA5,EXO1,HAT1,CDK1,BUB1B,CKAP2L,CKS1B,HJURP,PIK3R4,C2orf47,DBR1,C6orf153,PIK3CB,UHRF1,SLC4A1AP,FBXO5,TTC18,IFT140,RNF180,TXNDC9,UBE2S,KIF11,NR3C2,DNMT1,PHC3,SGOL1,CEP55,MCM6,FBRS,XRN1,TTLL9,FOXM1,KIFC1,EME1,GINS2,SFRS12,HNRNPM,UBE2C,KIAA2018,AFG3L2,SETD1A,MKI67,SGOL2,SSRP1,BUB1,DEPDC1,AURKB,NCAPH,RACGAP1,RRP1,MMADHC,MSL2,CEP63,ANLN,KIF23,CDCA3…	CHROMOSOME_SEGREGATION	7.96692	4.12525e-05
M67	ACC	3	129	M4	SLC31A1,CABC1,NCBP1,POLE3,QSOX2	NA	9.45639	4.16912e-05
M36	ACC	3	44	M3	SERPINI2,REG3G	POSITIVE_REGULATION_OF_PHOSPHOLIPID_BIOSYNTHETIC_PROCESS	0.101529	4.38533e-05
M579	ACC	4	47	M133	SGPP2,LOC647121	URONIC_ACID_METABOLIC_PROCESS	0.10532	4.48667e-05
M836	ACC	4	54	M183	UBE2S	PROTEIN_PEPTIDYL_PROLYL_ISOMERIZATION	8.02982	4.87132e-05
M835	ACC	4	32	M183	GINS2	DNA_DEPENDENT_DNA_REPLICATION	6.89062	4.91067e-05
M1853	ACC	6	43	M1456	TMEM232	NA	0.12722	5.07779e-05
M1053	ACC	5	13	M361	CABC1	NA	0.108833	5.30875e-05
M1321	ACC	5	43	M643	TIAL1	NA	7.89094	6.09982e-05
M832	ACC	4	18	M183	KIFC1,BRCA1	DNA_DEPENDENT_DNA_REPLICATION	8.96657	6.19937e-05
M1755	ACC	6	18	M1049	POLE3	MRNA_EXPORT_FROM_NUCLEUS	7.74475	6.79809e-05
M1276	ACC	5	24	M605	SPNS3	NA	0.132138	6.8929e-05
M106	ACC	3	50	M4	PSME4,SP8	NA	11.5914	7.01219e-05
M63	ACC	3	78	M4	ZMAT1,CBX2	MORPHOGENESIS_OF_A_BRANCHING_STRUCTURE	0.114907	7.48961e-05
M831	ACC	4	74	M183	KIF4A,FOXM1,ANLN	ORGANELLE_FISSION	7.17387	8.76899e-05
M829	ACC	4	203	M183	KIF2C,CDCA8,CDCA5,TROAP,UHRF1,SGOL1,HJURP,EME1	CHROMOSOME_SEGREGATION	7.12659	9.15395e-05
M1542	ACC	5	151	M829	KIF2C,CDCA8,CDCA5,TROAP,UHRF1,HJURP	CHROMOSOME_SEGREGATION	7.09547	9.48905e-05
M736	ACC	4	68	M154	TMEM232,CASC1	NA	0.139593	9.68666e-05
M643	ACC	4	57	M138	TIAL1,DNAJC9,DDX50	NA	7.45153	0.000101484
M574	ACC	4	155	M133	TSR2,NAGS,PLCXD3,ABAT	NA	0.120283	0.000104602
M94	ACC	3	61	M4	CHIC1	NA	0.140267	0.000105101
M1456	ACC	5	62	M736	TMEM232,CASC1	CILIUM_OR_FLAGELLUM_DEPENDENT_CELL_MOTILITY	0.142393	0.000107245
M440	ACC	4	18	M86	C20orf56,FOXA2	REGIONALIZATION	6.95339	0.000114186
M365	ACC	4	20	M68	SNHG1	NA	8.19319	0.000117407
M468	ACC	4	42	M94	CHIC1,HS6ST3	NA	0.143386	0.000118342
M1242	ACC	5	131	M574	TSR2,PLCXD3	NA	0.122485	0.000119556
M1557	ACC	5	12	M832	KIFC1	DNA_REPLICATION	6.86452	0.000124106
M1887	ACC	6	15	M1562	UBE2S	NA	6.65303	0.000154094
M645	ACC	4	23	M138	ETV4,NAA40,BBS1	NA	0.145091	0.000161581
M1974	ACC	7	15	M1872	HJURP	REGULATION_OF_NUCLEAR_DIVISION	6.51944	0.000177641
M1550	ACC	5	38	M830	BUB1B,CASC5,CENPI	CHROMOSOME_SEGREGATION	5.82683	0.000181779
M1872	ACC	6	99	M1542	KIF2C,CDCA5,HJURP,MCM6	DNA_REPLICATION	6.48755	0.000184445
M416	ACC	4	16	M76	ORAI2	CELL_AGGREGATION	0.153684	0.000199368
M583	ACC	4	28	M133	NDUFA1	NA	6.41601	0.000221436
M84	ACC	3	63	M4	EARS2	CELLULAR_RESPONSE_TO_NITROGEN_STARVATION	0.154277	0.000231717
M426	ACC	4	11	M78	STARD10	NA	0.157278	0.000235399
M138	ACC	3	197	M6	RUFY2,TIAL1,YME1L1,PPRC1,WAPAL,WAC,GTPBP4,NOLC1,TM9SF3,ETV4,DDX50,DNAJC9	NA	5.90979	0.000236564
M580	ACC	4	73	M133	PRCC,YY1AP1,CRTC2	NA	6.27258	0.00024448
M25	ACC	3	102	M3	STAR,AMHR2,C4orf49,NR0B1,FAM195A,GLT25D1	ETHER_METABOLIC_PROCESS	0.178048	0.000261533
M1563	ACC	5	14	M836	ILF3	NA	5.57742	0.000268906
M1011	ACC	5	33	M286	STAR	ETHER_METABOLIC_PROCESS	0.179106	0.000274877
M285	ACC	4	10	M25	GLT25D1	NA	5.49363	0.000278755
M334	ACC	4	45	M50	GBP2,CISH	NA	6.18989	0.000286468
M50	ACC	3	50	M3	GBP2,CISH	NA	6.18989	0.000286468
M1554	ACC	5	58	M831	KIF4A,FOXM1,ANLN	NUCLEAR_CHROMOSOME_SEGREGATION	5.51348	0.000286632
M379	ACC	4	10	M72		NA	6.14805	0.000292293
M154	ACC	3	153	M6	TMEM232,CASC1,PNPLA4,AIFM1,DEXI,ZNF688	NA	0.181433	0.000292489
M86	ACC	3	28	M4	C20orf56,FOXA2	REGIONALIZATION	5.49118	0.000297048
M1752	ACC	6	12	M1048	NCBP1	NA	5.59114	0.000314719
M1070	ACC	5	183	M371	MTM1,FNIP1,ATP7A,AUP1,HERC3,WDR44	TOR_SIGNALING	0.184394	0.00032037
M133	ACC	3	1141	M5	TSR2,PRCC,C5orf32,VPS72,SGPP2,PLCXD3,SPNS3,YY1AP1,CPNE4,PRPF40A,MMRN2,C1orf43,AKR1D1,COX7B,SETDB1,PSMD4,NDUFA1,LAS1L,PIPSL,PDZD11,ABCA3,ZNF23,PRRX2,SF3B4,MAGI2,SEPT5,ASGR1,ARHGAP17,MEGF10,CRTC2,B4GALT3,SCAMP3,AGPS,LOC642852,NAGS,RIN3,IKZF4,TSPYL2,NUDT12,CHST5,ABAT,PCBP3,R3HDM1,MAPK8IP3,KIAA0947,MTRR,ARPC2,APOBEC2,TRIP12,RARG,SLC22A11,SLC29A4,EMB,FASTKD3,FAM104B,ACADL,SLC25A14,RIT1,SLC26A6,MORF4L2	REGULATION_OF_TRANS_SYNAPTIC_SIGNALING	0.165223	0.000323714
M5	ACC	2	1381	M1	TSR2,PRCC,C5orf32,VPS72,SGPP2,PLCXD3,SPNS3,YY1AP1,P2RX2,PRAP1,CPNE4,PRPF40A,MMRN2,C1orf43,AKR1D1,RAX,COX7B,SETDB1,PSMD4,NDUFA1,LAS1L,PIPSL,GCGR,PDZD11,ABCA3,ZNF23,PRRX2,SF3B4,MAGI2,SEPT5,ASGR1,ARHGAP17,MEGF10,ABCG8,ACOT12,CRTC2,B4GALT3,FAM104B,SCAMP3,SLC26A2,CGB2,TSPYL2,AGPS,LOC642852,NAGS,RIN3,IKZF4,PLA2G12B,TSPAN18,CGB,NUDT12,CHST5,ABAT,CALY,PCBP3,R3HDM1,MAPK8IP3,KIAA0947,MTRR,ARPC2,APOBEC2,TRI…	REGULATION_OF_TRANS_SYNAPTIC_SIGNALING	0.165223	0.000323714
M111	ACC	3	64	M4	TRIM23,CPEB4	NA	0.165362	0.000325306
M1179	ACC	5	29	M515	TRIM23	NA	0.165362	0.000325306
M613	ACC	4	34	M133	MMRN2	NA	0.184023	0.000340912
M4	ACC	2	4365	M1	MTM1,LMTK2,RNF14,ATP7A,TRIM56,KDM3B,WDR5,SLC31A1,AUP1,CHIC1,RPS3,ZMAT1,ZXDB,FNIP1,LYRM7,PHAX,TTC37,MLL3,HERC3,WDR44,RLIM,GAK,BEX2,HSPA9,TRIM23,PHF8,FTSJD1,DMXL1,SUV420H2,HNRNPH2,RAD50,PRPS1,MBTPS1,RPL27A,KRIT1,RBL2,LYSMD3,RPL32,YIPF5,SSBP4,AFF4,FAM108A1,CLINT1,PRRG1,PSMD13,SEC61B,MAGEF1,LDHB,PNPLA8,SNRPG,PSMB7,PARP2,C1orf57,RPL37A,NCBP1,CPEB4,C1GALT1C1,CABC1,CTSA,TMEM231,ASB8,RPS8,RPS27A,KIAA1033…	NUCLEAR_TRANSCRIBED_MRNA_CATABOLIC_PROCESS_NONSENSE_MEDIATED_DECAY	0.186331	0.000347895
M371	ACC	4	218	M72	MTM1,HERC3,WDR44,FNIP1,ATP7A,THUMPD2,AUP1,PHAX	NA	0.190369	0.000410071
M360	ACC	4	86	M67	SLC31A1,NCBP1,POLE3,PRPF4	NA	5.20346	0.000468061
M287	ACC	4	12	M25	WBP2,FN3K	NA	0.19002	0.000472008
M515	ACC	4	40	M111	TRIM23	GOLGI_VESICLE_TRANSPORT	0.174661	0.000476777
M1560	ACC	5	17	M835	GINS2,RNASEH2A	SISTER_CHROMATID_COHESION	4.77667	0.000479006
M122	ACC	3	95	M4	PRRG1,ZXDB,ARSD,C1GALT1C1,OAT,MPDZ	NA	0.195673	0.000499658
M483	ACC	4	20	M98	LONP2	NA	0.151276	0.000519044
M78	ACC	3	38	M4	NCRNA00087,NR0B2	NA	0.189609	0.000521868
M1049	ACC	5	29	M360	POLE3	NCRNA_EXPORT_FROM_NUCLEUS	5.14451	0.000534051
M286	ACC	4	72	M25	STAR,AMHR2,C4orf49,NR0B1,FAM195A,CYP2W1	ETHER_METABOLIC_PROCESS	0.213132	0.000624318
M356	ACC	4	22	M65	ILKAP,THAP4	NA	4.9245	0.000685151
M575	ACC	4	22	M133	SF3B4	NA	4.9252	0.000688347
M619	ACC	4	17	M133	LHX2,SLC29A4	PITUITARY_GLAND_DEVELOPMENT	4.93463	0.000708396
M844	ACC	4	142	M184	ILF2,PDIA6,HAT1,TTC18,TTLL9	NA	0.203827	0.000727233
M1259	ACC	5	27	M587	C5orf32	NA	0.206516	0.000765649
M587	ACC	4	31	M133	C5orf32	NA	0.206516	0.000765649
M1048	ACC	5	52	M360	SLC31A1,NCBP1,CIDEA	NA	4.79925	0.000861617
M1580	ACC	5	16	M844	TTC18	NA	0.22344	0.000870512
M247	ACC	4	25	M13	MAPK12,MAPK11	NA	4.44068	0.000871465
M475	ACC	4	21	M96	SNAP23,VPS39,SPG11	ORGANELLE_MEMBRANE_FUSION	0.225399	0.00087926
M80	ACC	3	13	M4	HOXC11	PROXIMAL_DISTAL_PATTERN_FORMATION	5.24061	0.000899314
M434	ACC	4	66	M83	BEX2	NA	0.226509	0.000930304
M83	ACC	3	73	M4	BEX2	NA	0.226509	0.000930304
M1577	ACC	5	60	M844	ILF2,PDIA6	NA	0.212838	0.00094112
M399	ACC	4	28	M73	RPL13A	COTRANSLATIONAL_PROTEIN_TARGETING_TO_MEMBRANE	4.41342	0.00094533
M498	ACC	4	11	M106	ENTPD8,EFNA2	NA	4.70735	0.000966593
M233	ACC	4	13	M12	COL5A1,CERCAM	COLLAGEN_BIOSYNTHETIC_PROCESS	4.18108	0.000971944
M1108	ACC	5	34	M434	BEX2	COFACTOR_BIOSYNTHETIC_PROCESS	0.22901	0.00097691
M415	ACC	4	12	M76	ELOVL1	NA	5.16126	0.00100694
M1142	ACC	5	59	M474	RLIM,XIAP	PROTEIN_POLYUBIQUITINATION	0.228779	0.00100856
M474	ACC	4	68	M96	RLIM,XIAP	NA	0.228779	0.00100856
M96	ACC	3	89	M4	RLIM,XIAP,SPG11	NA	0.228779	0.00100856
M1280	ACC	5	14	M609	ZNF23	NA	0.194609	0.00101941
M1357	ACC	5	13	M661	SCNM1	NA	4.63863	0.00105888
M376	ACC	4	11	M72	TTC33	NA	0.218028	0.0011075
M72	ACC	3	530	M4	MTM1,ATP7A,HERC3,FNIP1,PRPS1,AUP1,LYSMD3,WDR44,ASB8,THUMPD2,MKI67IP,FAM199X,PTCD2,DNASE1L1,CYP2U1,ENOX2,MKRN1,PHAX,B4GALT2,POC1B	CELLULAR_GLUCOSE_HOMEOSTASIS	0.233106	0.00110921
M1018	ACC	5	10	M312	CSGALNACT1	NA	0.21855	0.00114456
M1136	ACC	5	46	M471	WDR5	NA	4.2489	0.00115175
M1882	ACC	6	41	M1554	KIF4A,RACGAP1	ORGANELLE_FISSION	4.25746	0.00116796
M79	ACC	3	33	M4	C22orf29,SBF1	NA	4.56063	0.00118788
M65	ACC	3	55	M4	SNRPG,ILKAP	NA	4.5284	0.00122448
M471	ACC	4	72	M95	WDR5,DOLPP1	STRESS_RESPONSE_TO_METAL_ION	4.20049	0.00126182
M232	ACC	4	45	M12	FAM36A,CDK14,BFSP1	NA	0.221505	0.00131397
M1628	ACC	5	10	M869	FOXE1	NA	4.50423	0.00134598
M924	ACC	5	43	M213	PRF1	NA	0.223346	0.00134734
M1590	ACC	5	16	M846	TXNDC9,MRPS5	NA	4.45204	0.00137733
M1020	ACC	5	16	M313	PRLR,SPEF2	NA	0.224376	0.0013861
M1566	ACC	5	13	M837	HNRNPM	NA	4.1622	0.00142826
M1133	ACC	5	24	M468	CHIC1	NA	0.241108	0.00142914
M1206	ACC	5	10	M543	ATP6AP2,C1GALT1C1	NA	0.243822	0.00153333
M1578	ACC	5	14	M844	HAT1	NA	4.38079	0.00154385
M881	ACC	4	29	M188	C8ORFK29	NA	4.38123	0.00154477
M481	ACC	4	19	M98	FTSJD1	NA	0.206614	0.00155047
M313	ACC	4	21	M41	PRLR	NA	0.227875	0.00156602
M517	ACC	4	10	M111	NRGN,CACNB3	NA	4.39202	0.00156761
M552	ACC	4	54	M124	SUV420H2	NA	4.07127	0.00158807
M840	ACC	4	13	M183	NASP,C11orf84	NA	0.251813	0.00169303
M598	ACC	4	10	M133	TSPYL2	NA	0.247321	0.00175929
M262	ACC	4	58	M19	MOBKL3,ACP1	NA	4.73219	0.00182309
M1129	ACC	5	23	M466	CLINT1	NA	0.249934	0.00184555
M437	ACC	4	48	M84	EARS2,PARN	CELLULAR_KETONE_METABOLIC_PROCESS	0.246056	0.00186646
M121	ACC	3	57	M4	PHF8	DEMETHYLATION	0.234153	0.00186809
M539	ACC	4	43	M121	PHF8	REGULATION_OF_BODY_FLUID_LEVELS	0.234153	0.00186809
M274	ACC	4	39	M22	NCRNA00086	NA	4.21891	0.00204325
M1958	ACC	7	16	M1793	P2RX2,CALY	NA	3.75683	0.00209793
M1478	ACC	5	18	M770	STK3	NA	0.236925	0.00210239
M1531	ACC	5	10	M820	DNAI1	NA	0.252106	0.00210461
M757	ACC	4	16	M158	PARP16	NA	0.266224	0.00213474
M349	ACC	4	10	M63	MPP7	NA	0.257746	0.00225598
M1479	ACC	5	20	M773	SELS,EIF3J	NA	4.16564	0.00228182
M1278	ACC	5	11	M608	ETV5	NA	4.03388	0.00228369
M602	ACC	4	37	M133	APOBEC2,PCBP3,SLC22A11	PROGESTERONE_METABOLIC_PROCESS	4.1562	0.00231739
M661	ACC	4	19	M141	SCNM1	NA	3.88125	0.00235066
M166	ACC	3	47	M6	DHX9	NUCLEAR_EXPORT	3.72364	0.00235954
M230	ACC	4	33	M12	ALS2CR4,G0S2	NA	0.258249	0.00242472
M837	ACC	4	43	M183	HNRNPM,FBXO5	INTERLEUKIN_2_SECRETION	3.85606	0.00254478
M478	ACC	4	14	M97	RAB14,FBXW2	NA	3.83324	0.00256403
M53	ACC	3	14	M3	DMAP1,FAM158A	NA	3.87847	0.00261546
M781	ACC	4	23	M166	DHX9	POSITIVE_REGULATION_OF_NUCLEOCYTOPLASMIC_TRANSPORT	3.64359	0.00269331
M978	ACC	5	13	M247	MAPK12	NA	3.7775	0.00274657
M1289	ACC	5	17	M613	MMRN2	NA	0.264676	0.00277818
M22	ACC	3	138	M3	NCRNA00086,RIC3,ZNF275,EXOSC10	NA	3.75569	0.00291854
M570	ACC	4	119	M132	P2RX2,PRAP1,GCGR,RAX,ABCG8,CALY,LPPR3,SHISA7	SECOND_MESSENGER_MEDIATED_SIGNALING	3.60113	0.0029273
M385	ACC	4	11	M72	PIK3R1,NCOA7	NA	0.268158	0.0031299
M1093	ACC	5	98	M412	RNF14,TAF7	NA	0.269207	0.00313418
M76	ACC	3	248	M4	RNF14,LYRM7,CPPED1,PHF15,PGGT1B,TAF7,DMXL1,HSD17B4,NDFIP1	NA	0.271414	0.00332588
M1235	ACC	5	108	M570	P2RX2,PRAP1,GCGR,RAX,ABCG8,CALY,LPPR3,SHISA7	REGULATION_OF_TRANS_SYNAPTIC_SIGNALING	3.52582	0.003369
M1057	ACC	5	14	M362	RPS24,GAS5	NUCLEAR_TRANSCRIBED_MRNA_CATABOLIC_PROCESS	3.67016	0.00340811
M1185	ACC	5	13	M526	SACM1L,VPRBP	NA	0.271504	0.00341277
M187	ACC	3	60	M8	HMX1,EN2,LMX1B	PATTERN_SPECIFICATION_PROCESS	3.93064	0.0034522
M1559	ACC	5	11	M835	CCNF	NA	3.48549	0.00353153
M544	ACC	4	17	M122	PRRG1	NA	0.274413	0.00360974
M1220	ACC	5	20	M552	FYCO1,EZH1,XPC	NA	0.291822	0.00405587
M123	ACC	3	71	M4	KIAA1033,UBE3B,GNS,APPL2	NA	0.291988	0.00406148
M132	ACC	3	239	M5	P2RX2,PRAP1,RAX,GCGR,ABCG8,ACOT12,SLC26A2,CGB2,PLA2G12B,TSPAN18,CGB,CALY,LPPR3,SHISA7	SECOND_MESSENGER_MEDIATED_SIGNALING	3.42771	0.00408352
M735	ACC	4	12	M154	HERPUD1	NA	0.291921	0.00434443
M324	ACC	4	53	M47	ABCB4,QPCT,ASB4	REGULATION_OF_CALCIUM_ION_TRANSMEMBRANE_TRANSPORT	3.57653	0.00443279
M524	ACC	4	17	M115	PTAR1	NA	3.42258	0.00446217
M73	ACC	3	99	M4	RPL13A,RPL18,RPS11	ESTABLISHMENT_OF_PROTEIN_LOCALIZATION_TO_ENDOPLASMIC_RETICULUM	3.37318	0.00482664
M363	ACC	4	45	M68	RPS27A	COTRANSLATIONAL_PROTEIN_TARGETING_TO_MEMBRANE	3.49233	0.00484462
M428	ACC	4	11	M79	C22orf29	NA	3.48283	0.00490123
M609	ACC	4	29	M133	ZNF23,ZFP90	NA	0.269597	0.00491179
M1494	ACC	5	10	M781	UCHL5,CDC73	NA	3.32614	0.00495484
M243	ACC	4	38	M13	GRIN3B,PALM3,HES7	RESPONSE_TO_ACID_CHEMICAL	3.48077	0.00495775
M105	ACC	3	14	M4	MCART1	NA	3.70466	0.00498973
M347	ACC	4	26	M63	ZMAT1	NA	0.300914	0.00512007
M572	ACC	4	23	M133	CPNE4	GLUTAMATE_RECEPTOR_SIGNALING_PATHWAY	0.289656	0.0052872
M824	ACC	4	10	M180	ATHL1	NA	3.28928	0.00540408
M543	ACC	4	18	M122	C1GALT1C1	NA	0.304338	0.0054781
M386	ACC	4	19	M72	PTCD2	NA	0.303978	0.00548158
M158	ACC	3	26	M6	IVD,PARP16	NA	0.309002	0.00548869
M69	ACC	3	141	M4	LMTK2,TRIM56,PEX1,DENND4C,FNIP2	NA	0.302834	0.00549135
M573	ACC	4	11	M133	CYP7B1	NA	0.293033	0.00563151
M1599	ACC	5	16	M851	IFT140	INSULIN_RECEPTOR_SIGNALING_PATHWAY	0.275999	0.00578484
M473	ACC	4	17	M95	NPY6R	MUSCLE_CELL_DEVELOPMENT	3.39332	0.00578952
M124	ACC	3	81	M4	SUV420H2,SFRS16,PAQR6	NA	3.24713	0.00585046
M1982	ACC	7	11	M1892	TNRC6A	NA	0.307928	0.00593475
M617	ACC	4	13	M133	2022-09-05	NA	3.24111	0.00601231
M648	ACC	4	38	M138	YME1L1,GTPBP4	NA	3.27247	0.00602846
M1017	ACC	5	44	M312	C9orf84	NA	3.38113	0.00656081
M1267	ACC	5	15	M594	WDR12	NA	3.3303	0.00665368
M179	ACC	3	57	M6		GLYCOLYTIC_PROCESS_THROUGH_FRUCTOSE_6_PHOSPHATE	0.298346	0.00666304
M364	ACC	4	10	M68	C4orf34	NA	0.312794	0.00668524
M228	ACC	4	43	M12	MITF,PTPRM,ARHGEF10L	NA	0.312499	0.00674317
M98	ACC	3	66	M4	FTSJD1,FUK,LONP2	NA	0.283315	0.00679974
M45	ACC	3	11	M3	ANKRD43	NA	3.32258	0.00689801
M1219	ACC	5	32	M552	SUV420H2	REGULATION_OF_MRNA_SPLICING_VIA_SPLICEOSOME	3.1713	0.00691293
M1601	ACC	5	26	M855	PIK3R4,ZNF148	NA	0.315635	0.00697843
M1753	ACC	6	11	M1048	ZBTB5	NA	3.19154	0.00703282
M542	ACC	4	33	M122	ZXDB,OAT,ARMCX1	MEMBRANE_LIPID_CATABOLIC_PROCESS	0.316457	0.00712147
M1115	ACC	5	28	M437	EARS2,PARN	KETONE_BIOSYNTHETIC_PROCESS	0.303134	0.00727237
M1487	ACC	5	12	M775		NA	0.306538	0.00772388
M958	ACC	5	22	M228	MITF	NA	0.320727	0.00786419
M529	ACC	4	13	M117	LMF2	NA	3.10813	0.00797595
M869	ACC	4	45	M187	HMX1,EN2,LMX1B	DORSAL_VENTRAL_PATTERN_FORMATION	3.24573	0.00809694
M101	ACC	3	42	M4	TMEM231	NA	0.309759	0.00816462
M846	ACC	4	66	M184	TNRC6A,SFRS12,TXNDC9	NA	0.310689	0.00829465
M184	ACC	3	444	M7	ILF2,PDIA6,TNRC6A,IMMT,HAT1,C2orf47,C6orf153,SLC4A1AP,TTC18,IFT140,TXNDC9,FBRS,TTLL9,SFRS12,AFG3L2,SETD1A,MMADHC,CKS1B,TRIM52,FAM43B,TIMM17A,LOC642597	TRANSLATIONAL_ELONGATION	0.323725	0.00832673
M838	ACC	4	38	M183	NR3C2,RNF180	NA	0.324094	0.00854835
M1589	ACC	5	22	M846	TNRC6A	NA	3.19674	0.00871518
M965	ACC	5	14	M232	CDK14,BFSP1	NA	0.312986	0.0087226
M1793	ACC	6	23	M1235	P2RX2,ABCG8	SECOND_MESSENGER_MEDIATED_SIGNALING	3.04092	0.00901013
M489	ACC	4	28	M101	TMEM231	NA	0.315147	0.00918601
M427	ACC	4	11	M78	NR0B2	NA	0.32666	0.00920629
M110	ACC	3	64	M4	SSBP4,PDZD4,TMEM59L	NA	3.03383	0.00924801
M513	ACC	4	60	M110	SSBP4,PDZD4,TMEM59L	NA	3.03383	0.00924801
M1567	ACC	5	12	M837	RIOK1	NA	3.08534	0.00967439
M607	ACC	4	10	M133		NA	0.331197	0.00973251
M353	ACC	4	17	M64		NA	3.00511	0.00996669
M370	ACC	4	18	M72	ENPP5	NA	0.334006	0.0101199
M551	ACC	4	19	M124	SFRS16,MLL4	EMBRYONIC_SKELETAL_SYSTEM_DEVELOPMENT	3.01382	0.0102086
M237	ACC	4	14	M12	TBX10	NA	0.333034	0.0103261
M1790	ACC	6	10	M1220	TTC9	NA	0.347785	0.0109999
M762	ACC	4	10	M160	TMSB10	NA	2.96522	0.0110135
M1214	ACC	5	11	M549	APPL2	NA	0.345428	0.011158
M68	ACC	3	156	M4	RPS3,RPL37A,RPS27A,RPL27A,RPS25,SNHG1	COTRANSLATIONAL_PROTEIN_TARGETING_TO_MEMBRANE	2.9375	0.0116302
M1892	ACC	6	15	M1589	TNRC6A	NA	0.341834	0.0119267
M520	ACC	4	23	M113	MRFAP1L1,ZNF721,GAK	ESTABLISHMENT_OF_PROTEIN_LOCALIZATION_TO_POSTSYNAPTIC_MEMBRANE	0.351496	0.0121018
M412	ACC	4	133	M76	RNF14,TAF7,NDFIP1,CPPED1	NA	0.342764	0.0121352
M1738	ACC	6	35	M1000	HMGCR	NA	3.07928	0.0122221
M189	ACC	3	78	M8	UBOX5,SNRPB2	NA	0.338633	0.0122824
M3	ACC	2	2154	M1	NR5A1,TBX3,NCRNA00086,NOV,C9orf84,RIC3,GBP2,STAR,EREG,MOBKL3,HMGCR,ABCB4,CYP11A1,ACAT2,TNS4,FDXR,FDX1,C4orf49,HLA.B,HSPD1,SEPT6,FAM19A4,CISH,ACPL2,ST8SIA5,PKP3,LOC152225,AHSP,SERPINI2,HMGCS1,RUNDC3B,AMHR2,DHCR24,HSPE1,MVD,LEF1,MUCL1,DHCR7,LONRF2,AXIN2,ASB4,PPFIA4,HLA.E,ASTN1,ACP1,S100A9,CSGALNACT1,MYT1,C12orf34,NKD1,SCAP,QPCT,ZNF711,VIT,FDPS,NR0B1,EPB41L1,ISM1,SCAND3,ZNF275,EMID2,AIM2,SLC47A1,SLC…	STEROID_BIOSYNTHETIC_PROCESS	0.340537	0.0123074
M302	ACC	4	10	M33	ZDHHC18,RELT	NA	3.02617	0.0123598
M502	ACC	4	19	M107	SEC61B	NA	2.89883	0.0125892
M155	ACC	3	28	M6	FATE1	PEPTIDE_CROSS_LINKING	3.01828	0.0126045
M1797	ACC	6	11	M1235	SHISA7	NA	2.87692	0.0130927
M47	ACC	3	65	M3	ABCB4,QPCT,FAM19A4	NA	2.90665	0.0131957
M1153	ACC	5	10	M482	BRD7	NA	0.334125	0.0132358
M487	ACC	4	17	M100	CCDC22,GRIPAP1	NA	0.356632	0.0136624
M962	ACC	5	18	M230	G0S2	NA	0.350841	0.01395
M608	ACC	4	18	M133		NA	2.89081	0.0139527
M85	ACC	3	39	M4	HIST1H4H	CHROMATIN_ASSEMBLY	2.8617	0.0140087
M56	ACC	3	18	M3	C15orf55,C6orf81	NA	2.84208	0.0142423
M1023	ACC	5	11	M316	ATP2B2	NA	2.97877	0.0143702
M19	ACC	3	96	M3	MOBKL3,HSPD1,ACP1,SCAP	NA	2.9487	0.0146192
M1178	ACC	5	49	M513	SSBP4,PDZD4	NA	2.82599	0.0148163
M1781	ACC	6	29	M1178	SSBP4	NA	2.82599	0.0148163
M54	ACC	3	28	M3	TIMP1	NA	0.353157	0.0148937
M1789	ACC	6	10	M1220	EZH1	NA	0.364318	0.0150933
M594	ACC	4	41	M133	PRPF40A,TRIP12	RESPONSE_TO_LEUKEMIA_INHIBITORY_FACTOR	2.75834	0.0151172
M173	ACC	3	55	M6	CYP27A1,TTLL4	XENOBIOTIC_CATABOLIC_PROCESS	0.355534	0.0154298
M222	ACC	4	14	M12	COL4A2	EXTRACELLULAR_STRUCTURE_ORGANIZATION	2.73356	0.0154637
M1060	ACC	5	18	M363	RPS27A	COTRANSLATIONAL_PROTEIN_TARGETING_TO_MEMBRANE	0.356585	0.0155769
M684	ACC	4	21	M142	TMEM48,ZW10	NA	2.80895	0.0157578
M1594	ACC	5	50	M847	IMMT,AFG3L2	ATP_SYNTHESIS_COUPLED_ELECTRON_TRANSPORT	2.91005	0.0158376
M355	ACC	4	22	M65	SNRPG	POSITIVE_REGULATION_OF_ESTABLISHMENT_OF_PROTEIN_LOCALIZATION_TO_TELOMERE	2.79013	0.0159692
M1177	ACC	5	11	M513	TMEM59L	NA	2.78522	0.0161804
M374	ACC	4	14	M72	PFKM	NA	0.368587	0.0164759
M828	ACC	4	14	M182	DUS2L	NUCLEAR_TRANSCRIBED_MRNA_CATABOLIC_PROCESS_EXONUCLEOLYTIC	0.35981	0.016672
M888	ACC	4	46	M189	UBOX5	NA	0.359193	0.0168004
M312	ACC	4	61	M41	C9orf84,CSGALNACT1	CELLULAR_CARBOHYDRATE_BIOSYNTHETIC_PROCESS	2.76819	0.0171265
M1231	ACC	5	11	M568	KCNU1	NA	2.7591	0.0171912
M910	ACC	5	22	M195	C1orf186	ANTIGEN_PROCESSING_AND_PRESENTATION_VIA_MHC_CLASS_IB	0.371726	0.0172982
M787	ACC	4	51	M168	COX18,TMEM128	NA	0.371742	0.017311
M589	ACC	4	21	M133	AGPS	PRODUCTION_OF_SIRNA_INVOLVED_IN_RNA_INTERFERENCE	2.70016	0.0173124
M770	ACC	4	27	M162	STK3	NA	0.361659	0.0174816
M500	ACC	4	26	M106	SP8,PSME4	NA	2.85998	0.01768
M743	ACC	4	20	M155	FATE1	PEPTIDE_CROSS_LINKING	2.85413	0.017986
M1960	ACC	7	13	M1795	GCGR	NA	2.66337	0.0180026
M948	ACC	5	15	M219	ACSL5	NA	0.374045	0.0180549
M41	ACC	3	102	M3	C9orf84,ZNF711,PRKCA	CHEMICAL_SYNAPTIC_TRANSMISSION_POSTSYNAPTIC	2.74426	0.0181456
M13	ACC	3	130	M2	DBN1,GRIN3B,MAPK12,PALM3,HES7,F12,MAPK11	POSITIVE_REGULATION_OF_MAP_KINASE_ACTIVITY	2.73271	0.0181684
M225	ACC	4	52	M12	PAG1,JAK1	NA	0.36583	0.0182025
M113	ACC	3	50	M4	GAK,MRFAP1L1	NA	0.374645	0.0182385
M1183	ACC	5	10	M520	MRFAP1L1	NA	0.374793	0.0183365
M482	ACC	4	22	M98	FUK	NA	0.351979	0.0183376
M95	ACC	3	103	M4	WDR5,DOLPP1,C9orf78,NPY6R	STRESS_RESPONSE_TO_METAL_ION	2.65909	0.0186046
M1263	ACC	5	10	M589	SAP130,UGGT1	NA	2.66245	0.0188087
M1028	ACC	5	35	M324	ABCB4,QPCT	REGULATION_OF_CALCIUM_ION_TRANSMEMBRANE_TRANSPORT	2.74972	0.0190125
M691	ACC	4	14	M143	GSDMB	NA	2.64464	0.0193294
M1330	ACC	5	19	M648	YME1L1	NA	2.66216	0.0194566
M485	ACC	4	51	M99	FAM108A1,HDGFRP2,SPPL2B	NA	2.6983	0.0196346
M99	ACC	3	60	M4	FAM108A1,HDGFRP2,SPPL2B	NA	2.6983	0.0196346
M51	ACC	3	10	M3		NA	2.80642	0.0197053
M171	ACC	3	35	M6	QSER1	NA	0.378068	0.0198292
M200	ACC	4	16	M9	LY96	REGULATION_OF_RESPONSE_TO_BIOTIC_STIMULUS	0.381649	0.0206913
M1532	ACC	5	10	M821	BCKDK	NA	0.374213	0.0212298
M37	ACC	3	27	M3	COL14A1	NA	0.374368	0.0214637
M380	ACC	4	13	M72	CD99L2	REGULATION_OF_WATER_LOSS_VIA_SKIN	0.375681	0.0215903
M526	ACC	4	21	M116	VPRBP	CYTOCHROME_COMPLEX_ASSEMBLY	0.385482	0.0218174
M116	ACC	3	61	M4	APPL1	NA	0.38649	0.0221358
M1064	ACC	5	100	M366	LMTK2,TRIM56,FNIP2	NA	0.386897	0.0223035
M135	ACC	3	23	M6	PPIE,ERI3	MITOCHONDRIAL_ELECTRON_TRANSPORT_UBIQUINOL_TO_CYTOCHROME_C	2.64786	0.0226058
M397	ACC	4	17	M73	RPL18	VIRAL_GENE_EXPRESSION	2.56993	0.0230546
M31	ACC	3	61	M3	EREG,PKP3,NKX2.1	PEPTIDYL_TYROSINE_MODIFICATION	2.73793	0.0235321
M516	ACC	4	13	M111	CPEB4	NA	0.381253	0.0235939
M477	ACC	4	14	M97	RBM18,FKTN	NA	2.57851	0.0236556
M1409	ACC	5	13	M700	CCDC97,ZNF526	NA	2.54654	0.0240575
M801	ACC	4	10	M172		NA	2.55997	0.0241645
M585	ACC	4	61	M133	C1orf43,SCAMP3,MAPK8IP3	NA	2.60923	0.0242405
M125	ACC	3	28	M4	C1orf57,PRDX1	HYDROGEN_PEROXIDE_CATABOLIC_PROCESS	0.378563	0.0242503
M115	ACC	3	26	M4	PTAR1	NA	2.61295	0.0244874
M366	ACC	4	125	M69	LMTK2,TRIM56,PEX1,FNIP2,CCDC132	NA	0.393906	0.0246827
M168	ACC	3	73	M6	COX18,TMEM128	NA	0.393085	0.0247739
M854	ACC	4	14	M185	DBR1	NA	0.394169	0.0248809
M24	ACC	3	63	M3	PPFIA4,AK3L1	RESPONSE_TO_OXYGEN_LEVELS	2.60182	0.0249745
M761	ACC	4	22	M160	MRTO4,SRM	RIBOSOMAL_LARGE_SUBUNIT_BIOGENESIS	2.58621	0.0254871
M283	ACC	4	36	M24	PPFIA4	SURFACTANT_HOMEOSTASIS	2.52014	0.0255852
M973	ACC	5	21	M243	GRIN3B	NA	2.51919	0.0257528
M341	ACC	4	14	M56	C15orf55,C6orf81	NA	2.57901	0.0261409
M93	ACC	3	85	M4	YIPF5,CLINT1	NA	0.398129	0.0266784
M1571	ACC	5	27	M838	NR3C2,RNF180	NA	0.398783	0.0271127
M185	ACC	3	114	M7	PIK3R4,DBR1,PIK3CB,PHC3,XRN1,KIAA2018,MSL2,CEP63	NA	0.40199	0.0274228
M1726	ACC	6	11	M962	G0S2,HPS1	NA	0.40201	0.0280747
M1200	ACC	5	10	M539		NA	0.393117	0.0281473
M1270	ACC	5	17	M602	APOBEC2,SLC22A11	NA	2.55172	0.0283197
M1692	ACC	6	14	M924	APOL3	NA	0.394078	0.0285508
M545	ACC	4	17	M122	ARSD	BETA_CATENIN_TCF_COMPLEX_ASSEMBLY	0.404907	0.0289076
M805	ACC	4	11	M173	PPP1R16A	NA	0.397543	0.0297312
M323	ACC	4	11	M46	SCAND3	NA	2.4584	0.0297849
M646	ACC	4	21	M138	WAPAL	NA	2.48891	0.0299876
M1382	ACC	5	21	M689	AGAP6,AGAP4	NA	2.48236	0.0300072
M591	ACC	4	24	M133	VPS72	NA	2.51656	0.0301139
M548	ACC	4	11	M123	ISCU	NA	0.407794	0.0302179
M1281	ACC	5	10	M609	ZFP90	NA	0.398141	0.0303416
M117	ACC	3	48	M4	PHF5A	NA	2.51108	0.0307708
M777	ACC	4	10	M164	VCPIP1,RB1CC1	NA	0.398789	0.0308589
M690	ACC	4	15	M143	RBM6	NA	2.44855	0.0309492
M18	ACC	3	58	M3	HLA.B,HLA.E,NLRC5	NA	0.409575	0.0312706
M592	ACC	4	21	M133	PSMD4	NA	0.40747	0.0316396
M1204	ACC	5	17	M542	OAT	NA	0.410826	0.0317552
M758	ACC	4	10	M158	SLC25A43	NA	2.44426	0.0317661
M1923	ACC	6	12	M1630	KCNJ14,KIAA1683,ZSCAN21	NA	2.4616	0.0318338
M693	ACC	4	24	M143	C17orf56	NA	2.49267	0.0320049
M402	ACC	4	10	M73		NA	2.42259	0.0323474
M586	ACC	4	18	M133	LAS1L	NA	0.414045	0.0330634
M42	ACC	3	29	M3	VIT	NA	2.41505	0.0334222
M536	ACC	4	15	M119	SF4,NTN5	NA	2.46854	0.0338816
M872	ACC	4	24	M188	ACCN3	NA	2.46435	0.0341417
M877	ACC	4	94	M188	ZNF653,CCDC130,LPPR2,SAFB2,S1PR3	NA	2.41475	0.0347929
M1453	ACC	5	10	M729	KLHL12	NA	0.42132	0.036031
M549	ACC	4	22	M123	APPL2	NEGATIVE_REGULATION_OF_NERVOUS_SYSTEM_DEVELOPMENT	0.420812	0.0362501
M1336	ACC	5	27	M650	KBTBD7,AKAP10	NA	0.421189	0.0363871
M97	ACC	3	47	M4	RBM18,RAD23B,UBQLN1	CELLULAR_RESPONSE_TO_CAFFEINE	2.35277	0.0369273
M1170	ACC	5	20	M503	PSMB7	MITOCHONDRIAL_TRANSLATION	2.36613	0.0370206
M1164	ACC	5	20	M489	TMEM231	NA	0.411815	0.0370382
M1921	ACC	6	10	M1627	EN2	NA	2.4318	0.0378618
M294	ACC	4	15	M30	C4orf40	NA	2.35356	0.0382892
M1663	ACC	5	21	M894	ASAH1,ATP6V1B2,LIN37	NA	0.420176	0.0383172
M257	ACC	4	42	M18	HLA.B,HLA.E	T_CELL_MEDIATED_IMMUNITY	0.425762	0.0390841
M160	ACC	3	40	M6	SRM,MRTO4	INTRACELLULAR_PROTEIN_TRANSMEMBRANE_TRANSPORT	2.34672	0.0392414
M198	ACC	4	31	M9	C9orf167,PLAUR,ARL4C	NA	2.3422	0.0392572
M855	ACC	4	32	M185	PIK3R4,CEP63	NA	0.426842	0.0393935
M27	ACC	3	69	M3	NOV,LEF1	REGULATION_OF_OSTEOBLAST_DIFFERENTIATION	2.34056	0.0403094
M701	ACC	4	17	M144	TRIM39	NA	0.428516	0.040323
M753	ACC	4	10	M157	OPA1	NA	0.43294	0.0403858
M445	ACC	4	16	M87	CDK13,USP42	NA	2.3334	0.0413157
M436	ACC	4	15	M84	CENPBD1,GABARAPL2	NA	0.41858	0.0414451
M219	ACC	4	65	M12	FLI1,CYSLTR1,RNF125	REGULATION_OF_BODY_FLUID_LEVELS	0.42962	0.0415456
M1307	ACC	5	83	M638	TCEB2	ENERGY_DERIVATION_BY_OXIDATION_OF_ORGANIC_COMPOUNDS	0.433357	0.0419297
M638	ACC	4	147	M137	TCEB2,TBL3,NDUFB10,TIMM16,COX4I1,MRPS34	NA	0.433357	0.0419297
M1063	ACC	5	14	M363	RPS12	COTRANSLATIONAL_PROTEIN_TARGETING_TO_MEMBRANE	2.29891	0.0438329
M604	ACC	4	13	M133	PARK2,DZIP1L	NA	0.440198	0.0438723
M275	ACC	4	78	M22	RIC3,ZNF275	NA	0.434495	0.0440917
M1470	ACC	5	12	M763	SNX6,MALAT1	NA	0.441231	0.044903
M316	ACC	4	23	M43	EPB41L1	POSITIVE_REGULATION_OF_PHAGOCYTOSIS_ENGULFMENT	2.35878	0.0449755
M977	ACC	5	12	M247	MAPK11	NA	2.24365	0.0465191
M182	ACC	3	27	M6	DUS2L,E2F4	NA	0.43927	0.0465508
M1088	ACC	5	15	M408	MAGEA2,CSAG3	NA	2.29102	0.0469345
M547	ACC	4	27	M123	UBE3B	NA	0.446555	0.0470719
M1322	ACC	5	36	M644	RUFY2	NA	2.24791	0.0487156
M740	ACC	4	11	M154	LOC401397	NA	0.44795	0.0491165
M438	ACC	4	17	M85	HIST1H4H,HIST1H2BC,HIST1H2BK	CHROMATIN_ASSEMBLY	2.26258	0.0491266
M785	ACC	4	31	M167	RNF6,UBL3	HORMONE_MEDIATED_SIGNALING_PATHWAY	0.451027	0.0492558
M337	ACC	4	12	M54	TIMP1	NA	0.434174	0.0499316
M603	BLCA	4	242	M143	NKTR,GOLGA6L10,WDR52,SFRS11,PRPF39,DMTF1,LOC90834,CCNT2,LOC100128842,TIA1,LOC200030,ZNF333	SENSORY_PERCEPTION_OF_BITTER_TASTE	0.540129	8.55954e-05
M1298	BLCA	5	173	M603	NKTR,GOLGA6L10,WDR52,PRPF39,DMTF1,SFRS11	NA	0.560095	0.000207511
M822	BLCA	4	13	M210	C16orf79	NA	0.571073	0.000335435
M205	BLCA	3	38	M22	NSUN5P2	RRNA_BASE_METHYLATION	0.572508	0.000361813
M143	BLCA	3	479	M21	NKTR,LOC100190986,PRPF39,GOLGA6L10,MDM4,SFRS18,WDR52,LOC90834,SFRS11,DMTF1,TIA1,CCNT2,NCRNA00201,CCDC30,LOC100128842,LUC7L3,KIAA1407,ZNF224,LOC200030,FAM76B,ZNF333,OFD1	SENSORY_PERCEPTION_OF_BITTER_TASTE	0.58701	0.000638699
M1499	BLCA	5	11	M832	ZNF169	NA	0.590884	0.000727007
M1490	BLCA	5	10	M812	SNRNP70	NA	0.597513	0.000921838
M505	BLCA	4	11	M122		NA	0.601428	0.00108871
M600	BLCA	4	12	M143	OFD1	NA	0.605392	0.00132131
M287	BLCA	5	79	M46	MSRB3,ZEB1	POSITIVE_REGULATION_OF_NEURON_DIFFERENTIATION	1.64177	0.00150051
M1021	BLCA	5	81	M409	LOC100188947	XENOBIOTIC_CATABOLIC_PROCESS	0.61556	0.001966
M409	BLCA	4	99	M117	LOC100188947	XENOBIOTIC_GLUCURONIDATION	0.616255	0.00201105
M1481	BLCA	5	167	M812	CCNL2,AHSA2,ZNF692,LOC91316,CHKB.CPT1B,TBC1D3B	ACTIVATION_OF_GTPASE_ACTIVITY	0.619641	0.00205044
M8	BLCA	3	1226	M2	LMOD1,FXYD6,DCHS1,MSRB3,CALD1,ZNF521,GPR124,HPSE2,BOC,PYGM,ACTA2,CNN1,ZEB1,HSPB6,ZEB2,DACT3,MYH11,ANK2,TAGLN,CLIP3,SYNPO2,SPARCL1,CACNB2,PNMA6A,MYLK,TNS1,AP1S2,RAI2,GPRASP1,JAM3,GNAZ,HSPB7,PALLD,CLIC4,ADIPOQ,A2M,FBXL7,XPNPEP2,MYL9,MRVI1,TRO,HSPB2,TUBA1A,REEP1,THBS4,FILIP1L,CHRM2,ILK,RASL12,REEP2,PDZD4,CPA3,FGFR1,SCRG1,MAP1A,TCEAL2,ADRB3,FERMT2,SYT11,DGKB,ATP1A2,PSD,C16orf89,BMP5,MYADM,RUSC2,SYNM	MUSCLE_SYSTEM_PROCESS	1.6106	0.00224051
M824	BLCA	4	11	M210	ZGLP1	NA	0.621026	0.00225651
M289	BLCA	5	76	M47	DCHS1	MESENCHYMAL_CELL_PROLIFERATION	1.60461	0.00241096
M948	BLCA	6	70	M289	DCHS1,JAM3	MESENCHYMAL_CELL_PROLIFERATION	1.60335	0.00244441
M1600	BLCA	6	71	M1021	LOC100188947	XENOBIOTIC_CATABOLIC_PROCESS	0.6222	0.00247151
M832	BLCA	4	35	M214	RPL32P3,PPP1R3E	NA	0.62576	0.00247772
M621	BLCA	4	15	M144	LOC440944	NA	0.624881	0.00248932
M22	BLCA	2	759	M3	CCNL2,TTLL3,CDK3,ZNF692,ANKS3,AHSA2,WASH7P,C16orf79,RPL32P3,AGAP4,GTF2IRD2P1,CROCCL2,TAF1C,NSUN5P2,LOC92973,TTC14,AMY2B,PILRB,NPIPL3,AGER,YJEFN3,ZNF862,CHKB.CPT1B,NARFL,C17orf56,TBC1D3B,LOC91316,NUTF2,KIAA0895L,PPP1R3E,C6orf26,CDK5RAP3,CENPT,C15orf17,FAM193A,CDK10,CRYGS,C1orf213,PCGF3,ZGLP1,RHOT2,LUC7L,CTBP1,LOC338799	NA	0.626916	0.00265691
M1182	BLCA	5	15	M491	AQR	NA	1.59073	0.00275788
M859	BLCA	4	13	M222	MTHFD2	AMINO_ACID_ACTIVATION	1.58477	0.00312479
M812	BLCA	4	256	M208	CCNL2,ZNF692,AHSA2,AGAP4,WASH7P,NPIPL3,PILRB,LOC91316,CHKB.CPT1B,TBC1D3B,C15orf17,C1orf213	REGULATION_OF_GTPASE_ACTIVITY	0.635674	0.0035105
M214	BLCA	3	48	M22	RPL32P3,TTC14,PPP1R3E	EPITHELIAL_CILIUM_MOVEMENT_INVOLVED_IN_DETERMINATION_OF_LEFT_RIGHT_ASYMMETRY	0.640412	0.0040071
M207	BLCA	3	85	M22	TTLL3,AMY2B,GTF2IRD2P1,ZNF862	SKELETAL_MUSCLE_ADAPTATION	0.639625	0.00402759
M201	BLCA	3	38	M21	MRPL37,TTC4	NA	1.56122	0.00409916
M46	BLCA	4	144	M8	MSRB3,CALD1,MYLK,PALLD,CLIC4,ZEB1	AORTA_DEVELOPMENT	1.55971	0.00442116
M811	BLCA	4	16	M207	AMY2B	DIGESTION	0.643938	0.00453605
M210	BLCA	3	109	M22	CDK3,C16orf79,YJEFN3,C17orf56,C6orf26,ZGLP1,PAQR6	NA	0.643785	0.00456982
M962	BLCA	6	10	M313	APLP1	NA	1.55245	0.00479391
M932	BLCA	6	46	M265	KIRREL	RENAL_SYSTEM_DEVELOPMENT	1.53852	0.0057743
M797	BLCA	4	22	M201	MRPL37	NA	1.53114	0.00592856
M39	BLCA	4	354	M8	LMOD1,HPSE2,CNN1,ACTA2,MYH11,SYNPO2,HSPB6,TAGLN,TNS1,DACT3,HSPB7,MYL9,HSPB2,CHRM2,RASL12,GPR124,SCRG1,ADRB3,MRVI1,PSD,DGKB,TCEAL2	MUSCLE_SYSTEM_PROCESS	1.53272	0.00594237
M262	BLCA	5	162	M36	AEBP1,EMILIN1,FAP,TIMP2	EXTRACELLULAR_STRUCTURE_ORGANIZATION	1.53603	0.00595207
M554	BLCA	4	14	M131		NA	0.65516	0.006429
M208	BLCA	3	295	M22	CCNL2,ZNF692,AHSA2,AGAP4,WASH7P,NPIPL3,TAF1C,PILRB,LOC91316,CHKB.CPT1B,KIAA0895L,TBC1D3B,C15orf17,CDK10,C1orf213	NA	0.657489	0.00680112
M810	BLCA	4	68	M207	TTLL3,GTF2IRD2P1,ZNF862	NA	0.660421	0.00747281
M265	BLCA	5	58	M36	KIRREL,KIAA0247	NA	1.51463	0.00752488
M930	BLCA	6	155	M262	AEBP1,EMILIN1,FAP,TIMP2	EXTRACELLULAR_STRUCTURE_ORGANIZATION	1.51729	0.00754315
M1608	BLCA	6	12	M1076	ZNF823	NA	0.665447	0.00859387
M450	BLCA	4	32	M117	ZNF193,ZNF184	NA	0.665602	0.00876241
M209	BLCA	3	63	M22	ANKS3,NARFL,CRYGS	NA	0.666101	0.00881153
M345	BLCA	5	55	M92	COL6A2,GFPT2	BONE_GROWTH	1.49171	0.0102276
M704	BLCA	4	11	M171		NA	1.48671	0.0102916
M110	BLCA	4	57	M18	DPYSL5	HYPOTHALAMUS_DEVELOPMENT	1.48832	0.0103633
M813	BLCA	4	29	M208	CDK10,CENPT	NA	0.672613	0.0103651
M417	BLCA	4	100	M117	FER1L4	ORGANIC_HYDROXY_COMPOUND_METABOLIC_PROCESS	0.671977	0.0109911
M606	BLCA	4	15	M143	LUC7L3	NA	0.674269	0.0113075
M818	BLCA	4	17	M209	CRYGS	NA	0.67769	0.0117549
M805	BLCA	4	18	M205	NSUN5P2,SUZ12P	RRNA_BASE_METHYLATION	0.676443	0.0117641
M276	BLCA	5	199	M39	LMOD1,MYH11,HSPB6,SYNPO2,CNN1,TNS1,HSPB7,DACT3,MRVI1	MUSCLE_SYSTEM_PROCESS	1.47687	0.0118881
M919	BLCA	6	155	M259	COL3A1,COL1A1,CDH11,COL6A3,COL5A2	EXTRACELLULAR_STRUCTURE_ORGANIZATION	1.48003	0.0121267
M443	BLCA	4	11	M117	CDKAL1	NA	0.681706	0.01322
M964	BLCA	6	84	M319	CD109,CORO1C,ADCY7,CD44	SUSCEPTIBILITY_TO_NATURAL_KILLER_CELL_MEDIATED_CYTOTOXICITY	1.47022	0.0132376
M936	BLCA	6	144	M276	LMOD1,MYH11,CNN1,HSPB7,SYNPO2,DACT3,TNS1,HSPB6,MRVI1	MUSCLE_SYSTEM_PROCESS	1.46769	0.0132953
M581	BLCA	4	24	M138	KIAA1267	NA	0.681212	0.0135123
M36	BLCA	4	751	M5	COL3A1,AEBP1,COL1A1,PDGFRB,COL5A1,KIRREL,CALU,COL6A3,SPARC,NID2,EMILIN1,DDR2,COL4A1,ADAMTS12,FAP,COL4A2,COL1A2,COL5A2,FNDC1,TIMP2,CDH11,ADAMTS2,DCN,MFRP,SFRP2,PRKG1,OLFML1,P4HA3,CCDC80,THY1,ZNF469,ISLR,PRRX1,RUNX1T1,KIAA0247,LUM,MFAP4,DPT,OMD,ARSI,GLI2,TCF21,MCFD2,FN1	EXTRACELLULAR_STRUCTURE_ORGANIZATION	1.46839	0.0136133
M247	BLCA	5	15	M26	HLA.DRA,HLA.DPA1	NA	0.690327	0.0160092
M1116	BLCA	5	16	M450	ZNF193,LOC646851	NA	0.68988	0.016338
M787	BLCA	4	32	M197	WASF2,FOXK1	NA	1.4463	0.0173576
M1594	BLCA	6	17	M1008	TUBA3C,SSX6	NA	0.693115	0.0177814
M608	BLCA	4	16	M143		NA	0.694219	0.018191
M781	BLCA	4	13	M195	ALKBH5	NA	1.44015	0.018538
M47	BLCA	4	117	M8	DCHS1,ZNF521,JAM3,FBXL7,FGFR1	NA	1.43688	0.019501
M353	BLCA	5	21	M92	JAM2	GLOMERULAR_BASEMENT_MEMBRANE_DEVELOPMENT	1.4336	0.0200288
M1091	BLCA	5	25	M433	C10orf129,BHMT	STEROID_HORMONE_SECRETION	0.698053	0.0201241
M1237	BLCA	5	84	M536	HIPK3,IL6ST	PHOSPHATIDYLINOSITOL_DEPHOSPHORYLATION	1.43162	0.0206704
M1092	BLCA	5	18	M434	ZNF461	NA	0.700715	0.0207702
M391	BLCA	4	40	M113	SPRR2E,SPRR2D,SPRR2B	PEPTIDE_CROSS_LINKING	1.42697	0.0212874
M434	BLCA	4	48	M117	ZNF461,ZNF420	POSITIVE_REGULATION_OF_DENDRITE_MORPHOGENESIS	0.702316	0.0215795
M834	BLCA	4	13	M215	CTBP1	NA	0.701182	0.0216258
M807	BLCA	4	10	M205	ZNF337	NA	0.701434	0.0217245
M416	BLCA	4	66	M117	ZNF253,ZNF443,ZNF493	DNA_INTEGRATION	0.70206	0.021971
M1076	BLCA	5	33	M426	TRAK1,ZNF823	AMINOGLYCAN_CATABOLIC_PROCESS	0.703224	0.0230804
M1547	BLCA	5	13	M887	EIF2S1	COENZYME_METABOLIC_PROCESS	1.41548	0.0243171
M342	BLCA	5	19	M91	XAF1,IFI44L	RESPONSE_TO_TYPE_I_INTERFERON	0.706517	0.0244031
M1570	BLCA	7	118	M936	LMOD1,CNN1,DACT3,MYH11,TNS1,HSPB6	MUSCLE_SYSTEM_PROCESS	1.41521	0.0247153
M319	BLCA	5	98	M70	CD109,CD44,CORO1C,ADCY7,CD82,AHNAK2	SUSCEPTIBILITY_TO_NATURAL_KILLER_CELL_MEDIATED_CYTOTOXICITY	1.41537	0.0249586
M5	BLCA	3	876	M2	COL3A1,AEBP1,COL1A1,PDGFRB,COL5A1,MT2A,KIRREL,CALU,COL6A3,SPARC,SPHK1,FAP,NID2,EMILIN1,DDR2,COL4A1,ADAMTS12,COL4A2,COL1A2,PLAUR,COL5A2,FNDC1,TIMP2,CDH11,ADAMTS2,CST6,CLDN9,DCN,MFRP,SFRP2,ARSI,PRKG1,OLFML1,P4HA3,CCDC80,C9orf21,THY1,ZNF469,ISLR,PRRX1,IFITM3,RUNX1T1,KIAA0247,TEAD4,LUM,MFAP4,DPT,OMD,GLI2,TCF21,MCFD2,FN1	EXTRACELLULAR_STRUCTURE_ORGANIZATION	1.41633	0.0250861
M1193	BLCA	5	21	M499	OTUD5	AUTOPHAGY_OF_MITOCHONDRION	0.709047	0.0258032
M1192	BLCA	5	13	M499	HSD17B10,TIMM17B	NA	0.709028	0.0262048
M103	BLCA	4	53	M17	ATCAY,SYT4	INNERVATION	1.40433	0.0275369
M536	BLCA	4	104	M128	HIPK3,IL6ST,REV3L	PHOSPHATIDYLINOSITOL_DEPHOSPHORYLATION	1.40635	0.0277341
M683	BLCA	4	20	M162	PCDHB12	HOMOPHILIC_CELL_ADHESION_VIA_PLASMA_MEMBRANE_ADHESION_MOLECULES	1.40248	0.0285287
M820	BLCA	4	27	M210	CDK3,C17orf56	NA	0.713105	0.0286641
M952	BLCA	6	91	M292	FXYD6,BOC,CLIP3,ANK2	MULTICELLULAR_ORGANISMAL_SIGNALING	1.39986	0.0298451
M132	BLCA	3	60	M21		NUCLEOSOME_ORGANIZATION	0.715948	0.0302942
M9	BLCA	3	435	M2	CD109,KATNAL1,MSN,OSMR,SNAI2,GNB4,ANXA2P2,IL1RAP,KLHL5,AHNAK2,CORO1C,CD44,STX2,ATP6V0E2,FRMD6,ANXA2,S100A10,SLC16A1,KCNJ11,ADCY7,SGCB,TCP1,CD82,TIGD3,ARSJ,PLEKHB1	MELANOCYTE_DIFFERENTIATION	1.39771	0.0304133
M564	BLCA	4	32	M134	UBN2	NA	0.716691	0.0311102
M1491	BLCA	5	15	M813	CDK10	NA	0.717299	0.0316055
M441	BLCA	4	12	M117	TGFBR3	NA	0.719057	0.0324334
M372	BLCA	5	48	M103	ATCAY,SYT4	INNERVATION	1.38963	0.0326943
M117	BLCA	3	2674	M20	UPK2,C17orf28,SNX31,KLHDC7A,FER1L4,LOC100188947,BCAS1,RAPGEFL1,FMO9P,CCDC64B,TJP3,VSIG2,TRAK1,SLC30A2,TOX3,UPK3A,C1orf172,C20orf151,SPINK1,UPK1A,ELF3,SSH3,RHOU,TMPRSS4,VGLL1,FLJ45983,BHMT,ACER2,BEND5,CGN,PIK3C2B,VASH2,ATP8B1,CAPNS2,ZNF253,TMEM97,SDC1,EPN3,HNF1B,TLE2,RAB25,SGK2,SYTL1,AP1M2,ERBB3,GPC2,C2orf15,CRB3,C10orf129,CYP4B1,NR2F6,MPZL2,MEX3A,FOXA1,CLCA4,SCNN1B,PPFIBP2,PPARG,C14orf105,ZNF443,…	MONOCARBOXYLIC_ACID_METABOLIC_PROCESS	0.719075	0.0330217
M171	BLCA	3	71	M21	EXOC5,SNX6,NAA30	REGULATION_OF_EPIDERMAL_GROWTH_FACTOR_ACTIVATED_RECEPTOR_ACTIVITY	1.38746	0.0335026
M886	BLCA	4	21	M233		NA	1.38826	0.0343719
M197	BLCA	3	69	M21	UNC119B,WASF2,FOXK1	NEGATIVE_REGULATION_OF_TYPE_I_INTERFERON_PRODUCTION	1.38511	0.0348538
M1115	BLCA	5	14	M450	ZNF184,ZKSCAN4	NA	0.722813	0.0360651
M1671	BLCA	6	73	M1237	HIPK3,IL6ST	EPHRIN_RECEPTOR_SIGNALING_PATHWAY	1.37951	0.0375059
M973	BLCA	6	13	M353	JAM2,AFF3,NTRK3	REGULATION_OF_POSTSYNAPTIC_SPECIALIZATION_ASSEMBLY	1.37905	0.0376251
M986	BLCA	5	13	M378		POSITIVE_REGULATION_OF_DEFENSE_RESPONSE_TO_BACTERIUM	1.37605	0.0379119
M821	BLCA	4	15	M210	C6orf26	NA	0.726569	0.0383682
M601	BLCA	4	12	M143	ZNF26	NA	0.727066	0.0391404
M420	BLCA	4	120	M117	SNX31,CYB5A,PHF19,SCNN1B,MFI2	NA	0.727335	0.0397396
M1468	BLCA	5	14	M785	UNC119B	NA	1.37027	0.0413994
M70	BLCA	4	136	M9	CD109,OSMR,IL1RAP,CD44,CORO1C,ADCY7,CD82	POSITIVE_REGULATION_OF_REGULATED_SECRETORY_PATHWAY	1.37131	0.0415801
M320	BLCA	5	13	M70	STAT3	NA	1.36973	0.0416122
M49	BLCA	4	120	M8	FXYD6,BOC,CLIP3,ANK2,REEP2	MULTICELLULAR_ORGANISMAL_SIGNALING	1.37066	0.0417805
M165	BLCA	3	55	M21	EIF3A,VPS26A	PROTEIN_TARGETING_TO_VACUOLE	1.36733	0.0421386
M825	BLCA	4	18	M210	YJEFN3	NA	0.731184	0.0422482
M245	BLCA	5	31	M25	NKG7,PRF1,CCL4	RESPONSE_TO_CHEMOKINE	0.732393	0.0425113
M1564	BLCA	7	93	M930	AEBP1,FAP	EXTRACELLULAR_STRUCTURE_ORGANIZATION	1.36963	0.0430786
M282	BLCA	5	16	M40	CPA3,TPSAB1	REGULATION_OF_ANGIOTENSIN_LEVELS_IN_BLOOD	1.36659	0.043246
M1145	BLCA	5	10	M472	COX4I1	NA	0.730396	0.0435849
M1590	BLCA	6	11	M1004	MAGEA12,CSAG1,MAGEA2	NA	0.733462	0.0442961
M376	BLCA	5	46	M110	DPYSL5,CCKBR,FBN3	NA	1.36384	0.044609
M20	BLCA	2	2792	M3	UPK2,C17orf28,SNX31,KLHDC7A,FER1L4,LOC100188947,BCAS1,RAPGEFL1,FMO9P,CCDC64B,TJP3,VSIG2,TRAK1,SLC30A2,TOX3,UPK3A,C1orf172,C20orf151,SPINK1,UPK1A,ELF3,SSH3,RHOU,TMPRSS4,VGLL1,FLJ45983,BHMT,ACER2,BEND5,CGN,PIK3C2B,VASH2,ATP8B1,CAPNS2,ZNF253,TMEM97,SDC1,EPN3,HNF1B,TLE2,RAB25,SGK2,SYTL1,AP1M2,ERBB3,GPC2,C2orf15,CRB3,C10orf129,CYP4B1,NR2F6,MPZL2,MEX3A,FOXA1,CLCA4,SCNN1B,PPFIBP2,PPARG,C14orf105,ZNF443,…	XENOBIOTIC_METABOLIC_PROCESS	0.733878	0.0451243
M760	BLCA	4	10	M187	PSMA7	NA	1.35994	0.0463571
M575	BLCA	4	28	M137	SLC4A1AP	RIBONUCLEOPROTEIN_COMPLEX_BIOGENESIS	1.35716	0.0476768
M1011	BLCA	5	32	M404	TOX3	NA	0.736753	0.0478534
M404	BLCA	4	39	M117	TOX3	NA	0.736753	0.0478534
M909	BLCA	6	20	M245	NKG7,PRF1	NATURAL_KILLER_CELL_MEDIATED_IMMUNITY	0.739055	0.0486743
M1288	BLCA	5	10	M581	KIAA1267	NA	0.736808	0.0486944
M1492	BLCA	5	14	M813	CENPT	NA	0.738202	0.0491052
M1127	BLCA	5	13	M458	WBP1	NA	0.738613	0.0495998
M1554	BLCA	7	48	M905	CD3E,SLAMF6	T_CELL_ACTIVATION	0.739863	0.0497398
M1010	BLCA	5	17	M403	TPTE,BAGE	NA	0.738936	0.0499463
M1444	BRCA	5	12	M908	LZTFL1	NA	0.492717	8.19766e-05
M375	BRCA	5	15	M63		FATTY_ACID_DERIVATIVE_CATABOLIC_PROCESS	0.520537	0.000285602
M9	BRCA	3	742	M2	ESR1,TBC1D9,AGR3,THSD4,GPR77,CA12,PGR,UQCRH,S100A8,GATA3,YBX1,ANXA9,MAGOH,AFF3,MAPT,DNALI1,ACE2,S100A9,NXNL2,PARD6B,CT62,UTP11L,KDM4B,SERPINA11,C6orf97,KCNK15,DACH1,ERI3,CACNA2D2,ARSG,FSIP1,MRPS15,CLSTN2,PSAT1,ABAT,APH1B,HSD3B2,DBNDD2,AKR1B15,TMPRSS6	HORMONE_METABOLIC_PROCESS	0.567676	0.00149522
M26	BRCA	2	645	M3	APOBEC4,CASC1,ZMYND10,DNAH7,TEKT1,PCSK4,CCDC24,C7orf63,LRRC48,LRRC46,CCDC96,C14orf45,C10orf79,SPEF1,PCP2,P4HTM,C1orf158,CCDC30,C2orf81,CIRBP,TTC8,WDR19,WDR38,TUBA4B,RSPH1,CCDC103,NEK10,C9orf116,REEP6,C11orf35,WDR93,ZBBX,SEPSECS,CDHR4,NBR1,RIBC1,KIAA1407,LZTFL1,TTC18,WDR65,G6PC3	CILIUM_ORGANIZATION	0.570095	0.00157155
M41	BRCA	4	18	M5	RARRES3,CFB	NA	0.573588	0.001803
M383	BRCA	5	21	M63	PDZK1,C1orf173,NXNL2	NA	0.579945	0.00205349
M967	BRCA	6	195	M374	ESR1,AGR3,GPR77,GATA3,DNALI1,C6orf97,CA12,PARD6B	SIGNAL_RELEASE	0.591509	0.003032
M900	BRCA	4	37	M292	TTC8,C14orf45	MONOCARBOXYLIC_ACID_METABOLIC_PROCESS	0.594129	0.00318531
M292	BRCA	3	520	M26	CASC1,ZMYND10,DNAH7,PCSK4,CCDC24,C7orf63,LRRC48,LRRC46,CCDC96,C14orf45,C10orf79,SPEF1,PCP2,P4HTM,CCDC30,C2orf81,CIRBP,TTC8,WDR19,RSPH1,CCDC103,NEK10,C9orf116,REEP6,C11orf35,WDR93,SEPSECS,NBR1,RIBC1,KIAA1407,LZTFL1,TTC18,WDR65,G6PC3	CILIUM_ORGANIZATION	0.593948	0.00328674
M1413	BRCA	5	11	M881	C16orf80	NA	1.66199	0.00398435
M1423	BRCA	5	25	M900	TTC8	THIOESTER_METABOLIC_PROCESS	0.605031	0.004409
M902	BRCA	4	77	M292	ZMYND10,SPEF1,C9orf116	CILIUM_ORGANIZATION	0.604984	0.00469923
M785	BRCA	4	24	M227	RBM5,RBM6	NA	0.609636	0.00501804
M382	BRCA	5	17	M63	KDM4B,LOC389033	NA	0.61158	0.00519664
M972	BRCA	6	19	M378	KCNK15,CXXC5	ESTABLISHMENT_OF_PIGMENT_GRANULE_LOCALIZATION	0.613004	0.0054187
M1443	BRCA	5	13	M908	DNAH7	MICROTUBULE_BASED_MOVEMENT	0.614983	0.00542603
M917	BRCA	6	173	M294	CD3E,CD2,ITK,CD3D,SLAMF6,SH2D1A,ZNF831,PRF1,SIRPG,BTLA,IL2RG	T_CELL_ACTIVATION	0.612637	0.00550607
M24	BRCA	2	1350	M3	TPX2,BUB1,CKAP2L,SUV39H2,CENPA,UBE2C,KIF2C,SRPK1,HJURP,NUDCD1,SGOL1,SHARPIN,STIL,CDCA8,MCM10,DCAF13,CDC20,CEP55,KIF4A,NCAPH,TROAP,CLSPN,MTDH,CENPI,KIF14,TTK,BUB1B,CDC123,EXOSC4,VCPIP1,MTERFD1,KLHDC1,MELK,TCEB1,PPP1R16A,FAM91A1,KARS,SETDB1,CASC5,ORC6L,TAF2,PIP5K1A,TUBA1C,XPO5,CDCA3,PTTG1,ARFGEF1,COX4NB,MSH2,PDSS1,UBR5,MRPL51,PSMD7,ASPM,CCNA2,CIRH1A,MAF1,CENPN,UBE2W,YWHAZ,CDT1,POGZ,PRUNE,E2F3,FAM54…	CHROMOSOME_SEGREGATION	1.62213	0.00625516
M762	BRCA	4	48	M216	HDAC2	NA	1.6176	0.00678571
M374	BRCA	5	244	M63	ESR1,GPR77,AGR3,PARD6B,GATA3,CT62,ANXA9,DNALI1,C6orf97,CA12	HORMONE_METABOLIC_PROCESS	0.621518	0.00704886
M63	BRCA	4	396	M9	ESR1,AGR3,GPR77,PGR,ANXA9,CA12,MAPT,DNALI1,NXNL2,PARD6B,GATA3,KDM4B,SERPINA11,CT62,KCNK15,C6orf97,ABAT,DBNDD2,TMPRSS6	HORMONE_METABOLIC_PROCESS	0.62369	0.00747373
M499	BRCA	4	13	M122	NCRNA00219	NA	0.625928	0.0079105
M938	BRCA	6	15	M314	GIMAP7	NA	0.627338	0.00807664
M1383	BRCA	5	11	M861	CENPN,ORC6L	NA	1.58957	0.00840264
M61	BRCA	4	182	M9	TBC1D9,THSD4,DACH1,CACNA2D2,YBX1,APH1B	NA	0.63294	0.0092985
M1455	BRCA	7	52	M917	ITK,SLAMF6,ZNF831,BTLA	T_CELL_ACTIVATION	0.632887	0.00934459
M268	BRCA	3	72	M24	KARS,CIRH1A,COX4NB	CELLULAR_RESPONSE_TO_NITROGEN_STARVATION	1.57149	0.00973867
M1429	BRCA	5	63	M902	ZMYND10,C9orf116,SPEF1	CILIUM_ORGANIZATION	0.636463	0.0104658
M961	BRCA	6	15	M364	C2orf40	POTASSIUM_ION_TRANSPORT	0.638695	0.0105716
M681	BRCA	4	40	M180	C5orf41	NA	0.639357	0.0105794
M553	BRCA	4	13	M134	UBXN11	NA	0.635446	0.0107702
M294	BRCA	5	209	M27	CD3E,CD2,ITK,CD3D,SLAMF6,SH2D1A,ZNF831,PRF1,SIRPG,BTLA,IL2RG,LCK	T_CELL_ACTIVATION	0.639161	0.0109776
M364	BRCA	5	20	M60	C2orf40,TSLP	POTASSIUM_ION_TRANSPORT	0.643226	0.0118147
M366	BRCA	5	151	M61	TBC1D9,THSD4,DACH1,CACNA2D2,YBX1	DORSAL_VENTRAL_PATTERN_FORMATION	0.643758	0.0122605
M901	BRCA	4	36	M292	C7orf63,NEK10	NA	0.646658	0.0123632
M301	BRCA	5	12	M30	HLA.DPA1	NA	0.644306	0.0125715
M253	BRCA	3	29	M22	FOXK1,GPRIN2	NA	1.54873	0.0129023
M1378	BRCA	5	62	M859	CDCA8,KIF2C	CHROMOSOME_SEGREGATION	1.54091	0.0139465
M163	BRCA	3	46	M22		NA	1.54074	0.0143817
M921	BRCA	6	76	M295	ACAP1,TBC1D10C,TMC8,JAK3,ZAP70	NA	0.65164	0.0148478
M840	BRCA	4	105	M263	TPX2,MELK	CELL_CYCLE_G1_S_PHASE_TRANSITION	1.53248	0.0151469
M591	BRCA	4	14	M149	ATG5,QRSL1	NA	1.53047	0.0155256
M296	BRCA	5	38	M27	FCRL5,TNFRSF17	NA	0.658614	0.0172505
M1427	BRCA	5	19	M901	C7orf63	NA	0.661298	0.0174692
M1382	BRCA	5	28	M861	CENPA	CHROMOSOME_SEGREGATION	1.51794	0.0175888
M908	BRCA	4	38	M292	DNAH7,LZTFL1,WDR19	MICROTUBULE_BASED_MOVEMENT	0.661582	0.0176174
M740	BRCA	4	34	M204	MRPS36,TAF9,COX7C	DNA_TEMPLATED_TRANSCRIPTION_TERMINATION	0.660456	0.0184623
M860	BRCA	4	56	M264	TROAP,UBE2C,PTTG1	REGULATION_OF_SISTER_CHROMATID_SEGREGATION	1.5134	0.0185419
M1394	BRCA	5	44	M867	DCAF13,MTERFD1	NA	1.51644	0.0186618
M56	BRCA	4	12	M6	LOC285548,SERPINB7	NA	1.50151	0.0191166
M1572	BRCA	6	38	M1378	CDCA8,KIF2C	CHROMOSOME_SEGREGATION	1.50673	0.0193824
M904	BRCA	4	45	M292	CCDC24,C2orf81	NA	0.66331	0.0197011
M208	BRCA	3	63	M22	SETD2,SLMAP,C3orf63,VPRBP	NA	0.667324	0.0199306
M378	BRCA	5	23	M63	KCNK15,CXXC5	CORNIFICATION	0.664795	0.0199634
M295	BRCA	5	101	M27	ACAP1,TBC1D10C,TMC8,PTPRCAP,JAK3,S1PR4,ZAP70	ANTIGEN_PROCESSING_AND_PRESENTATION_VIA_MHC_CLASS_IB	0.665052	0.0200185
M1577	BRCA	6	11	M1380	UBE2S,CDT1	NA	1.49794	0.0202462
M1243	BRCA	5	50	M650	IL6ST,RASEF	NA	0.667778	0.0205855
M906	BRCA	4	98	M292	CASC1,C10orf79,CCDC30	CILIUM_ORGANIZATION	0.669147	0.0210927
M555	BRCA	4	22	M134	ENO1,ADM,PLOD1,CA9	RESPONSE_TO_OXYGEN_LEVELS	1.49684	0.0211375
M650	BRCA	4	66	M168	IL6ST,RASEF,RAPGEF6	NA	0.670032	0.0216721
M1433	BRCA	5	35	M904	CCDC24	PRIMARY_ALCOHOL_CATABOLIC_PROCESS	0.668175	0.0220405
M745	BRCA	4	32	M208	SETD2	MICROTUBULE_CYTOSKELETON_ORGANIZATION_INVOLVED_IN_MITOSIS	0.672415	0.0228787
M216	BRCA	3	64	M22	HDAC2	NA	1.4888	0.0231361
M861	BRCA	4	66	M264	CENPA,ORC6L,CENPN,TUBA1C	CHROMOSOME_SEGREGATION	1.48504	0.0237054
M51	BRCA	4	21	M6	PCDHB12,PCDHB14	HOMOPHILIC_CELL_ADHESION_VIA_PLASMA_MEMBRANE_ADHESION_MOLECULES	1.48793	0.02383
M1302	BRCA	5	23	M734	TEX264	NA	0.675974	0.0248168
M14	BRCA	3	877	M2	FOXA1,MLPH,XBP1,CYP4Z2P,TFF3,SPDEF,PRR15,NOSTRIN,SIDT1,A2ML1,AR,TMC5,LIMA1,SPINK8,C1orf64,SLC44A4,ZNF552,DEGS2,KCNJ11,GALNT10,ZNF776,TFF1,ART3,INPP4B,FAM123B,LRRC31,PIP,AGR2,ZNF548,CAPN8,YEATS2,C17orf28,CYP4Z1,BCAM,TMBIM6,PALM	POTASSIUM_ION_TRANSPORT	0.678263	0.02583
M907	BRCA	4	32	M292	LRRC46,CCDC103	MICROTUBULE_BUNDLE_FORMATION	0.676977	0.0260603
M1586	BRCA	6	11	M1433	CCDC24	NA	0.675286	0.026768
M1438	BRCA	5	61	M906	CASC1	CILIUM_ORGANIZATION	0.681284	0.027472
M8	BRCA	3	350	M2	CLDN19,COL17A1,KRT16,TRIM29,KRT6B,KRTDAP,LY6D,C2orf40,SLC6A14,BBOX1,KRT17,PAK7,KRT5,SBSN,SLC7A3,KRT6C,SPRR1B,DSC3,PPP1R14C,PDZK1IP1,KRT6A,STAC2	CORNIFICATION	0.681018	0.0275384
M1307	BRCA	5	15	M740	TAF9,MRPS36	DNA_TEMPLATED_TRANSCRIPTION_TERMINATION	0.67867	0.0276267
M359	BRCA	5	46	M59	KRTDAP,SPRR1B,SFTPA1	CORNIFICATION	1.46641	0.0281629
M1411	BRCA	5	12	M880	KIAA0174,TERF2	NA	1.46397	0.028659
M168	BRCA	3	88	M22	IL6ST,RAPGEF6,RASEF	NA	0.683383	0.0287593
M1410	BRCA	5	27	M880		CELLULAR_RESPONSE_TO_NITROGEN_STARVATION	1.46364	0.0289406
M1580	BRCA	6	16	M1410	CIRH1A,NIP7	NA	1.46316	0.0295368
M1584	BRCA	6	55	M1429	ZMYND10,SPEF1	MICROTUBULE_BUNDLE_FORMATION	0.684795	0.0309055
M202	BRCA	3	61	M22	TEX264,NPRL2,CYB561D2,TMEM115	NA	0.686926	0.0316066
M264	BRCA	3	335	M24	CENPA,UBE2C,CDCA8,CDC20,KIF2C,TROAP,KLHDC1,HJURP,ORC6L,TUBA1C,CDCA3,PTTG1,MRPL51,CDT1,KIF18B,RANBP1,RAD54L,VPS35	CHROMOSOME_SEGREGATION	1.45611	0.0316442
M27	BRCA	4	401	M4	CD3E,ACAP1,TBC1D10C,CD3D,CD2,GBP5,ITK,TMC8,PTPRCAP,SLAMF6,SH2D1A,ZNF831,JAK3,PRF1,S1PR4,GBP1,ZAP70,SIRPG,BTLA,FCRL5,IL2RG,LCK,ICOS,IRF4,TIGIT	T_CELL_ACTIVATION	0.689068	0.033368
M863	BRCA	4	16	M264	VPS35,DNAJA2	NA	1.44841	0.0344807
M922	BRCA	6	18	M295	PTPRCAP,S1PR4	ACTIVATION_OF_JANUS_KINASE_ACTIVITY	0.691919	0.0349533
M645	BRCA	4	22	M163	DAAM1	NA	1.44654	0.0354981
M35	BRCA	4	64	M5	FLI1,C10orf54,GIMAP4,MFNG,GIMAP7	NA	0.69245	0.0360894
M1566	BRCA	6	92	M1367	BUB1,STIL,KIF4A,SGOL1	ORGANELLE_FISSION	1.43982	0.0382924
M206	BRCA	3	11	M22	PCDHA2	HOMOPHILIC_CELL_ADHESION_VIA_PLASMA_MEMBRANE_ADHESION_MOLECULES	1.43084	0.0402153
M363	BRCA	5	51	M60	CLDN19,COL17A1	NEUROTROPHIN_TRK_RECEPTOR_SIGNALING_PATHWAY	0.699561	0.0404253
M996	BRCA	6	14	M400	KIFC3	MUSCLE_HYPERTROPHY_IN_RESPONSE_TO_STRESS	1.42695	0.0407059
M60	BRCA	4	96	M8	CLDN19,COL17A1,C2orf40,PAK7,SLC7A3	NEUROTROPHIN_TRK_RECEPTOR_SIGNALING_PATHWAY	0.701494	0.0415427
M1446	BRCA	5	35	M909	PCSK4,CIRBP	NA	0.700061	0.0415568
M881	BRCA	4	33	M268	COX4NB,KARS,C16orf80	NA	1.42382	0.0419058
M255	BRCA	3	15	M22		NCRNA_EXPORT_FROM_NUCLEUS	1.42347	0.0423646
M559	BRCA	4	14	M136	VPS4A	NA	1.42087	0.0433643
M103	BRCA	4	38	M17	FAM126A	POSITIVE_REGULATION_OF_ERK1_AND_ERK2_CASCADE	0.704234	0.0448985
M1295	BRCA	5	12	M725		NA	0.703642	0.0454252
M415	BRCA	5	12	M73		NA	1.41632	0.045573
M46	BRCA	4	189	M6	COL5A2,COL1A2,LOX,COL6A3,THBS2,ASPN,FN1,FAP,LRRC15,DACT1	EXTRACELLULAR_STRUCTURE_ORGANIZATION	1.41421	0.0458256
M1301	BRCA	5	10	M734		NA	0.707488	0.0468589
M1309	BRCA	5	68	M741	DMXL1,TRIM23	NA	0.708428	0.047643
M89	BRCA	4	10	M15	ISG15,IFI35	NA	0.708396	0.0487488
M867	BRCA	4	72	M265	DCAF13,NUDCD1,MTERFD1,YWHAZ	NCRNA_METABOLIC_PROCESS	1.41406	0.0487562
M31	BRCA	4	146	M5	PTPRC,PIK3CG,IKZF1,GVIN1,GPR174,DOCK2,CD84	T_CELL_ACTIVATION	0.709381	0.0499431
M174	CESC	2	24	M3	WIZ	NA	0.354731	0.000260936
M1059	CESC	5	53	M320	ITGA5,ASAM,LOXL2	EXTRACELLULAR_STRUCTURE_ORGANIZATION	2.79008	0.000282915
M1033	CESC	5	16	M315	INHBA,ACTN1	INNERVATION	2.66698	0.000432106
M1576	CESC	6	33	M1059	ITGA5	EXTRACELLULAR_STRUCTURE_ORGANIZATION	2.6441	0.000480069
M972	CESC	4	13	M278	GFPT1	NA	2.60973	0.000630008
M1555	CESC	6	21	M1044	2022-03-04	POSITIVE_REGULATION_OF_VASCULAR_ENDOTHELIAL_GROWTH_FACTOR_RECEPTOR_SIGNALING_PATHWAY	2.49598	0.000852304
M793	CESC	3	17	M170		NA	0.403151	0.00107631
M320	CESC	4	98	M7	ITGA5,ITGA3,LAMC2,ASAM	HEMIDESMOSOME_ASSEMBLY	2.44361	0.00114205
M1577	CESC	6	16	M1059	ASAM,LATS2	HIPPO_SIGNALING	2.44267	0.00116529
M1066	CESC	5	38	M322	C6orf176,PTP4A1,B4GALT1	CELLULAR_RESPONSE_TO_FATTY_ACID	2.38977	0.00124194
M635	CESC	3	21	M93	CENPM	NA	0.412007	0.00129361
M204	CESC	3	10	M5		NA	2.39638	0.00146955
M441	CESC	3	16	M30	KHSRP	NA	0.423026	0.00168421
M618	CESC	3	38	M88	EIF3G	NA	0.418173	0.0017282
M1047	CESC	5	38	M317	AEBP1,MMP2,IGFBP7	REGULATION_OF_EXTRACELLULAR_MATRIX_ORGANIZATION	2.36477	0.00173137
M1067	CESC	5	69	M323	DKK3,COL5A1,MSRB3,CALD1	EXTRACELLULAR_STRUCTURE_ORGANIZATION	2.34993	0.0018725
M88	CESC	2	46	M3	EIF3G	NA	0.431538	0.00251376
M172	CESC	2	30	M3	SART3	COVALENT_CHROMATIN_MODIFICATION	0.448463	0.00271608
M1439	CESC	4	10	M797	RFC5,TIMELESS	NA	0.444672	0.00286191
M322	CESC	4	85	M7	C6orf176,CXCL2,PTP4A1,IL6,B4GALT1	RESPONSE_TO_MOLECULE_OF_BACTERIAL_ORIGIN	2.22709	0.00297104
M797	CESC	3	14	M172	SART3	NA	0.450442	0.00297699
M1734	CESC	7	13	M1555		POSITIVE_REGULATION_OF_VASCULAR_ENDOTHELIAL_GROWTH_FACTOR_RECEPTOR_SIGNALING_PATHWAY	2.19846	0.00308507
M1108	CESC	4	17	M354	PSME3	STEROL_BIOSYNTHETIC_PROCESS	2.21217	0.00352174
M1595	CESC	6	26	M1066	C6orf176	CELLULAR_RESPONSE_TO_FATTY_ACID	2.17254	0.00385694
M348	CESC	3	13	M14		NA	2.2431	0.0041782
M1064	CESC	5	33	M322	CXCL2,CXCL3	NEUTROPHIL_MIGRATION	2.17535	0.00439394
M452	CESC	3	30	M33	RHOT2,SPSB3	NA	0.46172	0.00440232
M427	CESC	3	23	M26	SERINC1,PPIL4	NA	2.22837	0.00459158
M1593	CESC	6	26	M1064	CXCL2,CXCL3	NEUTROPHIL_MIGRATION	2.16075	0.00473069
M303	CESC	3	11	M5	ELFN2	NA	2.13129	0.00483923
M28	CESC	2	77	M3	NDUFB7,NDUFA13	MITOCHONDRIAL_ELECTRON_TRANSPORT_NADH_TO_UBIQUINONE	0.468012	0.00516762
M519	CESC	3	14	M54	SDF2L1	NA	2.06419	0.00708657
M1025	CESC	5	30	M315	COL4A1	EXTRACELLULAR_STRUCTURE_ORGANIZATION	2.07058	0.00727448
M75	CESC	2	34	M3	URB2,TFB2M	NCRNA_METABOLIC_PROCESS	2.06754	0.00734458
M1061	CESC	5	114	M321	FERMT2,FSTL1,LAMB1,TIMP2	EXTRACELLULAR_STRUCTURE_ORGANIZATION	2.04313	0.00772867
M1700	CESC	7	124	M1501	CD3E,CD96,SLA2,CD2,SLAMF6,SIRPG	T_CELL_ACTIVATION	0.494185	0.00809742
M170	CESC	2	27	M3		NA	0.488067	0.00816418
M268	CESC	3	44	M5	RGL3,ENTPD8	NA	2.00989	0.00904247
M1774	CESC	8	88	M1700	CD3E,CD2,SLAMF6,TBX21	T_CELL_ACTIVATION	0.499664	0.00908961
M880	CESC	4	30	M212	ADH7,ABCC5,ABCA13	NA	0.494508	0.00914307
M359	CESC	3	10	M15		NA	2.01297	0.0107208
M589	CESC	3	26	M79	MFAP3,SLC25A46	NA	1.97609	0.0112002
M713	CESC	3	10	M127	PCMT1	NA	1.97682	0.0112254
M1129	CESC	4	17	M379	LUZP1	ACTIN_FILAMENT_ORGANIZATION	1.98824	0.0121403
M30	CESC	2	91	M3	NDUFA11,UQCR11,CLPP	RNA_SPLICING_VIA_TRANSESTERIFICATION_REACTIONS	0.508916	0.0128506
M1692	CESC	7	113	M1490	SASH3,CCR5,WAS,CD48,ITGAL,FERMT3,HCST	T_CELL_ACTIVATION	0.516184	0.0128875
M458	CESC	3	38	M35	ZNF134,ZNF772,ZNF304	NA	1.93676	0.0130671
M196	CESC	3	22	M5	DUOX1,PER3	INSULIN_SECRETION_INVOLVED_IN_CELLULAR_RESPONSE_TO_GLUCOSE_STIMULUS	0.515187	0.0133254
M1147	CESC	4	11	M398	ACBD3	NA	1.94199	0.01371
M1501	CESC	6	161	M1014	CD3E,CD96,SLA2,CD2,NKG7,ZNF831,SIRPG,SLAMF6	T_CELL_ACTIVATION	0.527063	0.0153002
M252	CESC	3	36	M5	BMP3	L_ALPHA_AMINO_ACID_TRANSMEMBRANE_TRANSPORT	0.523197	0.0157532
M637	CESC	3	10	M94	PCDHGA12	NA	1.90324	0.0164912
M292	CESC	3	16	M5	YPEL1	NA	0.529711	0.0178904
M1003	CESC	4	10	M301	2022-09-03	NA	0.534609	0.0179339
M72	CESC	2	41	M3	SGTA,CSNK1G2	NA	0.533857	0.019505
M1790	CESC	9	65	M1774	CD3E,SLAMF6	T_CELL_ACTIVATION	0.539929	0.0195624
M1035	CESC	5	11	M315	PCDHB17	NA	1.86118	0.0196138
M398	CESC	3	30	M18	C1orf58	REGULATION_OF_NUCLEOBASE_CONTAINING_COMPOUND_TRANSPORT	1.855	0.0202148
M416	CESC	3	53	M23	ZNF541,ZFR2,ABCA17P	CELLULAR_PROCESS_INVOLVED_IN_REPRODUCTION_IN_MULTICELLULAR_ORGANISM	0.539718	0.0205184
M1315	CESC	4	11	M618		NA	0.5418	0.0213244
M973	CESC	4	10	M278	DNAJC10,LYSMD4	NA	1.86028	0.021342
M636	CESC	3	12	M94	PCDHGA6	HOMOPHILIC_CELL_ADHESION_VIA_PLASMA_MEMBRANE_ADHESION_MOLECULES	1.86518	0.0216399
M1773	CESC	8	60	M1689	NCKAP1L,CYBB	REGULATION_OF_LEUKOCYTE_DIFFERENTIATION	0.545921	0.0218283
M1599	CESC	6	40	M1067	DKK3,MSRB3	EXTRACELLULAR_STRUCTURE_ORGANIZATION	1.84102	0.0220029
M287	CESC	3	12	M5	MMP3	COLLAGEN_CATABOLIC_PROCESS	1.84482	0.0226259
M1787	CESC	9	39	M1773	NCKAP1L	REGULATION_OF_LEUKOCYTE_DIFFERENTIATION	0.548647	0.0229285
M408	CESC	3	30	M22	C10orf119	REGULATION_OF_NUCLEAR_DIVISION	0.547503	0.0232964
M1755	CESC	7	35	M1599	DKK3,MSRB3	NERVE_GROWTH_FACTOR_SIGNALING_PATHWAY	1.82799	0.0235712
M1187	CESC	4	42	M440	NDUFA11,UQCR11	ATP_SYNTHESIS_COUPLED_ELECTRON_TRANSPORT	0.544686	0.0236317
M758	CESC	3	17	M148	C1orf43	NA	1.81775	0.0237539
M23	CESC	2	133	M3	ZNF541,SMC1B,ZFR2,C19orf57,ABCA17P,TCAM1P,KLHL35,SYCE2	HOMOLOGOUS_CHROMOSOME_SEGREGATION	0.551399	0.0244056
M878	CESC	4	14	M212	AKR1C1	PROGESTERONE_METABOLIC_PROCESS	0.550847	0.0252191
M735	CESC	3	10	M134	UBL4A	NA	0.555735	0.0258919
M212	CESC	3	52	M5	ADH7,AKR1C1,ABCC5	XENOBIOTIC_GLUCURONIDATION	0.551383	0.0262649
M1580	CESC	6	66	M1061	FERMT2,FSTL1	EXTRACELLULAR_STRUCTURE_ORGANIZATION	1.8022	0.0266769
M414	CESC	3	18	M23	C19orf57	NA	0.557931	0.0269194
M1490	CESC	6	138	M1013	SASH3,WAS,CCR5,CD48,FERMT3,MYO1F,ITGAL,HCST,RASAL3	LEUKOCYTE_CELL_CELL_ADHESION	0.557987	0.0270487
M379	CESC	3	30	M17	LUZP1	NA	1.82004	0.027093
M494	CESC	3	12	M47	NCKAP1	NA	1.808	0.0273353
M431	CESC	3	52	M28	NDUFB7,NDUFA13	MITOCHONDRIAL_ELECTRON_TRANSPORT_NADH_TO_UBIQUINONE	0.557107	0.0278445
M134	CESC	2	36	M3	EMD	NA	0.560827	0.0287873
M912	CESC	4	11	M234	KIF3C,NOXA1	NA	0.55742	0.0293107
M496	CESC	3	12	M47	ANAPC1	NA	1.78858	0.0301656
M843	CESC	4	43	M194	TMEM79	NA	0.562938	0.0307254
M1705	CESC	7	15	M1509	FCRL5,KIAA0125	NA	0.568982	0.0314789
M1218	CESC	4	20	M458	ZNF134,ZNF772	NA	1.76183	0.032188
M323	CESC	4	123	M7	PCYT1B,DKK3,COL5A1,MAP1B,MSRB3,MFGE8,CALD1	STRESS_RESPONSE_TO_METAL_ION	1.75486	0.033257
M1525	CESC	6	69	M1024	SPARC,NID2	EXTRACELLULAR_STRUCTURE_ORGANIZATION	1.75548	0.0332723
M578	CESC	3	10	M75	NUP133	NA	1.74354	0.0350767
M33	CESC	2	118	M3	MRPS34,NDUFB10,NUBP2,C16orf42,STUB1,RHOT2	TRANSLATIONAL_ELONGATION	0.574176	0.0351036
M1150	CESC	4	22	M408	C10orf119	NA	0.571757	0.0353276
M757	CESC	3	13	M148	SCAMP3	NA	1.74441	0.0359292
M247	CESC	3	35	M5	FAM83C	CORNIFICATION	0.571193	0.0360715
M94	CESC	2	26	M3	PCDHGA6,PCDHGA12	HOMOPHILIC_CELL_ADHESION_VIA_PLASMA_MEMBRANE_ADHESION_MOLECULES	1.75049	0.0369335
M148	CESC	2	64	M3	PRCC,SCAMP3,UBE2Q1	NA	1.73753	0.0370153
M569	CESC	3	12	M72	CSNK1G2	NA	0.574442	0.0376796
M956	CESC	4	29	M268	RGL3,CABP4	NA	1.72476	0.038141
M1701	CESC	7	19	M1501	NKG7,PDCD1	CYTOLYSIS	0.579906	0.0388968
M1018	CESC	5	35	M312	FCRL5	NA	0.582732	0.0392889
M627	CESC	3	18	M91	RIOK2,TAF9	NA	0.580565	0.0396079
M1460	CESC	5	12	M852	VWA3A	NA	1.7292	0.0406234
M567	CESC	3	17	M72	SGTA	POSITIVE_REGULATION_OF_PROTEIN_CATABOLIC_PROCESS	0.58136	0.0414341
M234	CESC	3	18	M5	C1orf210,KIF3C	NA	0.581334	0.0416612
M1014	CESC	5	254	M311	CD3E,TBC1D10C,PTPRCAP,CD96,SLA2,CD2,ACAP1,NKG7,SEPT1,ZNF831,SIRPG,SLAMF6	T_CELL_ACTIVATION	0.586657	0.0420809
M847	CESC	4	12	M196	DUOX1,CELSR2	REGULATION_OF_ANIMAL_ORGAN_MORPHOGENESIS	0.585474	0.042934
M846	CESC	4	22	M194	BNIPL	NA	0.586391	0.0429657
M440	CESC	3	75	M30	NDUFA11,UQCR11,CLPP	OXIDATIVE_PHOSPHORYLATION	0.584721	0.0439939
M1604	CESC	6	13	M1072	CHRM5	NA	0.587911	0.0445339
M280	CESC	3	14	M5		NA	0.587425	0.0452489
M278	CESC	3	27	M5	DNAJC10	RESPONSE_TO_ENDOPLASMIC_RETICULUM_STRESS	1.69968	0.0461125
M1329	CESC	4	11	M633	UQCR10,TXN2	NA	0.59342	0.0478884
M935	CESC	4	11	M252	GABRP,NR3C2	NA	0.590943	0.0480378
M1157	CESC	4	17	M415	SMC1B	NA	0.595634	0.0482554
M1509	CESC	6	23	M1018	FCRL5	POSITIVE_REGULATION_OF_INTERLEUKIN_10_PRODUCTION	0.59717	0.0491287
M907	CESC	4	49	M229	ZMYND10	CILIUM_ORGANIZATION	0.590039	0.0492578
M354	CESC	3	22	M15	PSME3	STEROL_BIOSYNTHETIC_PROCESS	1.68171	0.0493628
M472	CESC	3	20	M40	SNRPC	MITOCHONDRIAL_TRANSLATIONAL_TERMINATION	0.594251	0.0497011
M1670	CHOL	5	64	M893	TAOK1,NBEAL1,RIF1,KLHL11	NLS_BEARING_PROTEIN_IMPORT_INTO_NUCLEUS	0.206897	0.00568922
M893	CHOL	4	108	M284	TAOK1,HIPK3,NBEAL1,UHMK1,ETV3,RIF1	NLS_BEARING_PROTEIN_IMPORT_INTO_NUCLEUS	0.220655	0.00788655
M1306	CHOL	4	15	M500	ATXN7	NA	0.222264	0.00809933
M1020	CHOL	4	36	M336	REST	NA	0.244129	0.0130722
M500	CHOL	3	20	M80	ATXN7	NA	0.253203	0.0155867
M467	CHOL	3	54	M72	MRPL2,CSNK2B,MEA1	NA	3.85653	0.0174973
M1655	CHOL	5	10	M859		NA	3.85071	0.017589
M1285	CHOL	4	40	M492	POLK,AP3B1	NA	0.28477	0.0178616
M1681	CHOL	5	35	M901	RALGAPA2	REGULATION_OF_RECEPTOR_LOCALIZATION_TO_SYNAPSE	0.287781	0.0186945
M285	CHOL	3	51	M43	STUB1,NUBP2	BASE_EXCISION_REPAIR_AP_SITE_FORMATION	3.47486	0.0186945
M929	CHOL	4	37	M285	STUB1	BASE_EXCISION_REPAIR_AP_SITE_FORMATION	3.47486	0.0186945
M1672	CHOL	5	131	M894	CCNT1,KLHDC10,NCOA2,RAPGEF6,MYEOV2,APOOL	NA	0.289027	0.019055
M894	CHOL	4	172	M284	CCNT1,GPATCH8,MYEOV2,KLHDC10,C20orf94,NCOA2,APOOL,RAPGEF6	REGULATION_OF_CELLULAR_AMIDE_METABOLIC_PROCESS	0.289027	0.019055
M1142	CHOL	4	12	M394	FAM108A1	NA	3.76811	0.0195132
M1947	CHOL	5	14	M1285	POLK	PLASMA_MEMBRANE_ORGANIZATION	0.292958	0.0204962
M492	CHOL	3	189	M78	CTAGE1,SLC35F5,MPZL3,FCHO2,MIA2,FNIP2,POLK,ZGPAT	NA	0.29735	0.022252
M859	CHOL	4	25	M267	SPAG7,GABARAP,LSMD1	NA	3.30686	0.0232577
M284	CHOL	3	808	M43	CCNT1,ASXL2,TAOK1,RALGAPA2,HIPK3,UHMK1,KLHDC10,GPATCH8,SBNO1,RAPGEF6,NBEAL1,ZNF791,MYEOV2,KLHL11,RIF1,STRN,C20orf94,KIAA1267,MGAT5,ZNF281,PRKG1,ATP5E,HEATR5B,APOOL,ZNF641,NCOA2,EDIL3,CSNK2A1P,MLLT10,ETV3,ATAD2B,RRP1,INO80E,RNF111,USP32,DPP8,CLOCK,RNF169,ATRX,ATP6V1F,PRMT7	VESICLE_ORGANIZATION	0.302644	0.0236468
M43	CHOL	2	1226	M3	CCNT1,ASXL2,TAOK1,HIPK3,RALGAPA2,YIPF6,UHMK1,KLHDC10,GPATCH8,UEVLD,SBNO1,EHF,ZNF791,RAPGEF6,STUB1,SCAND1,NBEAL1,MYEOV2,MGAT5,KLHL11,RIF1,STRN,C20orf94,RPL7L1,KIAA1267,WDR43,ZNF641,ZNF281,PRKG1,ATP5E,NCKAP1,HEATR5B,NDUFC1,ETV3,APOOL,KCTD20,CYBA,NCOA2,EDIL3,C16orf42,CSNK2A1P,NUBP2,MLLT10,SNX22,TXNRD1,ATAD2B,RRP1,COPB1,NUP153,INO80E,DGUOK,SRPK2,RNF111,USP32,ZC3H15,DPP8,CLOCK,RNF169,FAM199X,ATRX,GRIN…	NA	0.302644	0.0236468
M342	CHOL	3	21	M50		NA	3.61115	0.0237301
M839	CHOL	5	13	M240	EPB41L3	NA	0.317821	0.0301211
M78	CHOL	2	261	M3	MIA2,CTAGE1,SLC35F5,MTIF3,MPZL3,FCHO2,SAP18,FNIP2,POLK,MRP63,POLR1D,CARKD,ZGPAT	NA	0.33071	0.0302353
M393	CHOL	3	94	M60	NDUFB7,NDUFA11,SGTA,UBXN6	MITOCHONDRIAL_ELECTRON_TRANSPORT_NADH_TO_UBIQUINONE	3.14754	0.0304143
M60	CHOL	2	409	M3	GADD45GIP1,NDUFB7,NDUFA11,C19orf53,ELOF1,TRAPPC5,ZNF81,C19orf56,SGTA,PAF1,C19orf62,SRA1,DYRK1B,KBTBD7,HDGFRP2,TAF1,BCOR,POLR2I,UBXN6,NDUFA13,TAF2,AKAP7	POSITIVE_REGULATION_OF_VIRAL_TRANSCRIPTION	3.14754	0.0304143
M1249	CHOL	4	27	M467	MRPL2	POSITIVE_REGULATION_OF_INSULIN_LIKE_GROWTH_FACTOR_RECEPTOR_SIGNALING_PATHWAY	3.3877	0.0315536
M1220	CHOL	4	15	M455	RHOC	CELLULAR_PIGMENTATION	3.02984	0.0356193
M1786	CHOL	5	54	M1027	SHPRH	NA	0.332748	0.0367604
M867	CHOL	4	30	M268	EXOC6B	NA	0.332748	0.0367604
M2158	CHOL	6	10	M1976	KIAA0494	NA	0.334967	0.0383974
M1250	CHOL	4	23	M467	MEA1	NA	2.94967	0.0400462
M1361	CHOL	4	25	M538	SDHB,C1orf151	MITOCHONDRIAL_TRANSPORT	2.86012	0.0421163
M1100	CHOL	4	10	M379	SIRT1	NA	0.368985	0.0479309
M1470	CHOL	5	12	M616	SETD2,NBEAL2,SMARCC1	NA	0.347564	0.0483781
M48	CHOL	2	153	M3	OTUD4,MAML2,SAMD8,SLC10A7,MRPS11,USP53	NA	0.352738	0.0484848
M243	COAD	5	23	M56	CDK10	NA	2.36698	0.000982842
M254	COAD	5	16	M56	TMEM151B	NA	2.33372	0.00101491
M353	COAD	5	26	M106	RBPMS2,PYGM	HEART_PROCESS	2.21114	0.00156264
M667	COAD	7	12	M492	YJEFN3	NA	2.25726	0.00161139
M124	COAD	4	15	M16	TUB,GALNTL1	NA	2.16416	0.00205431
M492	COAD	6	17	M255	YJEFN3	POSITIVE_REGULATION_OF_STRIATED_MUSCLE_CONTRACTION	2.13774	0.00291903
M255	COAD	5	24	M56	YJEFN3,SLC9A5	POSITIVE_REGULATION_OF_STRIATED_MUSCLE_CONTRACTION	2.11203	0.00310107
M16	COAD	3	1594	M5	MSRB3,FERMT2,LMOD1,SYNPO2,ZEB1,TCF4,TNS1,GLI3,CLIP3,JAM3,FBXL7,SLC22A17,MYH11,MAP1A,EVC,BOC,ANGPTL1,KIAA2022,ZNF853,FSTL1,HSPB8,MYL9,DZIP1,RNF150,GNAO1,CDO1,CALD1,ANTXR1,MYLK,MGP,FOXF1,RBPMS2,GPRASP1,PCDH18,APBB1,BNC2,MPDZ,FAT4,SCN7A,AOC3,TAGLN,ANK2,CADM3,CNN1,MRVI1,AKT3,SGCD,ETNK2,FHL1,D4S234E,TUB,NRXN3,LPHN2,EHD2,NACAD,ZNF568,KRT16,MRGPRF,DAAM2,PGR,PRELP,NEGR1,SALL2,JPH4,PTRF,MFAP4,LDB2,SYNM,PY…	HOMOPHILIC_CELL_ADHESION_VIA_PLASMA_MEMBRANE_ADHESION_MOLECULES	2.07706	0.00338876
M247	COAD	5	50	M56	ZNF767,DMTF1,NPHP3,CLK1	NA	2.04381	0.0046021
M482	COAD	6	63	M242	LENG8	NA	2.01953	0.00534483
M301	COAD	5	18	M66	SCAMP3	NA	2.02089	0.00640669
M92	COAD	4	25	M15	TRO,CPT1C	PIRNA_METABOLIC_PROCESS	1.92939	0.00741973
M110	COAD	4	181	M16	ZEB1,FBXL7,TCF4,MPDZ,AKT3,EVC,LDB2,SALL2,BMPR2,PGR,JAZF1,RAI14	POSITIVE_REGULATION_OF_OSSIFICATION	1.9572	0.00763302
M136	COAD	4	20	M17	SPOCK1	COLLAGEN_FIBRIL_ORGANIZATION	1.90958	0.00864548
M153	COAD	4	10	M18	HOXC6	NA	1.89034	0.00973388
M624	COAD	6	91	M363	ZEB1,MPDZ,AKT3	POSITIVE_REGULATION_OF_BONE_MINERALIZATION	1.88765	0.0114473
M120	COAD	4	15	M16	ANGPTL7,NRXN1,BAI3	NEUROTRANSMITTER_TRANSPORT	1.86785	0.0114887
M102	COAD	4	284	M16	MSRB3,FERMT2,CALD1,JAM3,DZIP1,SGCD,MYL9,FSTL1,MRVI1,GUCY1A3,NAP1L3,RNF180	MUSCLE_CONTRACTION	1.86902	0.0116615
M363	COAD	5	101	M110	ZEB1,MPDZ,AKT3,LDB2	POSITIVE_REGULATION_OF_BONE_MINERALIZATION	1.87826	0.0121029
M487	COAD	6	10	M246	TCTE3	NA	1.89611	0.0121369
M242	COAD	5	94	M56	LENG8,FLJ45340,SPDYE1	NA	1.85697	0.0126508
M113	COAD	4	11	M16	PTCH2	NA	1.84123	0.0131963
M205	COAD	5	19	M42	CXorf40B,SLC10A3	NA	1.83022	0.0133298
M118	COAD	4	64	M16	SLC22A17,NACAD	NA	1.82867	0.0140097
M464	COAD	6	127	M236	PILRB,CCNL2,HSF4,NSUN5P2,ZNF692	POSITIVE_REGULATION_OF_GTPASE_ACTIVITY	1.83745	0.0150487
M56	COAD	4	1004	M9	AHSA2,PILRB,LENG8,LOC91316,LOC440944,ZNF767,NKTR,AGAP4,CSAD,CCNL2,SFRS18,TTLL3,HSF4,SLC25A27,CHKB.CPT1B,LOC100190986,TAF1C,TCTE3,FLJ45340,WDR27,TUBGCP6,CDK10,NSUN5P2,KIAA0907,PABPC1L,STX16,TMEM151B,SPIRE2,PDXDC2,DMTF1,GIGYF1,YJEFN3,ZNF692,DDX12,CYP2D7P1,RPL32P3,ANO9,RASSF7,LOC147727,GOLGA6L10,FAM193B,LOC100272228,NCRNA00201,MAPK8IP3,NPHP3,RBM39,LOC200030,CTBP1,SNHG12,C17orf86,SPDYE1,SHISA7,LOC100…	NA	1.83673	0.0150715
M161	COAD	4	30	M18	CEP170,CAMSAP1L1	SYNAPTIC_GROWTH_AT_NEUROMUSCULAR_JUNCTION	1.81583	0.015169
M664	COAD	7	11	M478	AGER	NA	1.84837	0.0154212
M478	COAD	6	52	M241	LOC91316,CHKB.CPT1B,ATG16L2,AGER	NA	1.8246	0.0164838
M402	COAD	5	11	M140	ITGBL1	NA	1.79247	0.017649
M137	COAD	4	13	M17	VEGFC	NA	1.78566	0.0182432
M467	COAD	6	28	M236	TTLL3,PDXDC2	NA	1.78278	0.0185777
M17	COAD	3	44	M5	VEGFC	OSSIFICATION	1.77956	0.0189488
M241	COAD	5	88	M56	LOC91316,CHKB.CPT1B,AGER	NA	1.80014	0.019067
M345	COAD	5	40	M88	MXRA8	ANATOMICAL_STRUCTURE_REGRESSION	1.76411	0.0205223
M589	COAD	6	12	M303	FAM84A	NA	0.569183	0.020733
M236	COAD	5	196	M56	PILRB,AGAP4,TTLL3,CCNL2,CSAD,HSF4,NSUN5P2,ZNF692,PDXDC2,DDX12	POSITIVE_REGULATION_OF_GTPASE_ACTIVITY	1.76146	0.0226079
M86	COAD	4	97	M15	SPARC,COL1A2,MRC2,COL3A1,COL5A2,BGN	EXTRACELLULAR_STRUCTURE_ORGANIZATION	1.73056	0.024683
M237	COAD	5	169	M56	AHSA2,LOC200030,PABPC1L,RPL32P3,WDR27	NA	1.74327	0.0249094
M469	COAD	6	135	M237	AHSA2,LOC200030,RPL32P3	NA	1.73004	0.0269404
M618	COAD	6	114	M351	LMOD1,CNN1,FHL1,HSPB8	MUSCLE_CONTRACTION	1.71477	0.0273791
M256	COAD	5	18	M56	CPLX3	CELL_CELL_JUNCTION_ORGANIZATION	1.71393	0.02973
M9	COAD	3	1201	M3	AHSA2,PILRB,LENG8,LOC91316,LOC440944,ZNF767,NKTR,AKAP11,AGAP4,CSAD,CCNL2,SFRS18,TTLL3,MRPS31,N4BP2L2,KIAA1704,HSF4,SLC25A27,CHKB.CPT1B,LOC100190986,TAF1C,TCTE3,MED4,FLJ45340,WDR27,TUBGCP6,CUL4A,CDK10,KIAA0907,RNASEH2B,NSUN5P2,PABPC1L,STX16,TMEM151B,SPIRE2,PDXDC2,DMTF1,GIGYF1,YJEFN3,ZNF692,DDX12,CYP2D7P1,KPNA3,RPL32P3,ANO9,RASSF7,LOC147727,GOLGA6L10,FAM48A,FAM193B,LOC100272228,NCRNA00201,ARHGEF7,M…	NA	1.71388	0.0298529
M246	COAD	5	65	M56	LOC440944,TCTE3	NA	1.7059	0.0300433
M656	COAD	7	108	M464	PILRB,CCNL2,HSF4,NSUN5P2,ZNF692	NA	1.70403	0.0317377
M560	COAD	6	15	M291	ATAD3A,NOC2L	APOPTOTIC_DNA_FRAGMENTATION	0.588774	0.0319909
M347	COAD	5	173	M102	MSRB3,CALD1,SGCD,JAM3,MYL9,MRVI1	MUSCLE_CONTRACTION	1.69843	0.0322643
M133	COAD	4	15	M16	LTBP3	NA	1.68018	0.0334505
M61	COAD	4	50	M10	HIST1H2BJ,HIST1H1E	CHROMATIN_ASSEMBLY	1.70297	0.0336011
M106	COAD	4	232	M16	LMOD1,TNS1,RNF150,RBPMS2,HSPB8,CNN1,AOC3,PYGM,MFAP4,FHL1,CACNA2D1,RUNX1T1,RGMA	MUSCLE_CONTRACTION	1.67871	0.0341322
M123	COAD	4	19	M16	PCDHB12,PCDHB7	HOMOPHILIC_CELL_ADHESION_VIA_PLASMA_MEMBRANE_ADHESION_MOLECULES	1.67134	0.0346104
M122	COAD	4	32	M16	KIAA2022	NEGATIVE_REGULATION_OF_ACTIVIN_RECEPTOR_SIGNALING_PATHWAY	1.67583	0.0355939
M351	COAD	5	138	M106	LMOD1,CNN1,MFAP4,FHL1,RGMA,HSPB8	MUSCLE_CONTRACTION	1.66972	0.0360206
M376	COAD	5	49	M118	SLC22A17,NACAD	NA	1.66586	0.0363434
M15	COAD	3	517	M5	MXRA8,C1S,EFEMP2,EMILIN1,C1R,MRC2,AEBP1,SPARC,RAB34,TIMP2,COL1A2,TRO,SYDE1,COL3A1,PDLIM7,COL5A2,BGN,LPPR2,LGALS1,CPT1C,TUBB6,CCDC8,OLFML1,COL6A2,FLRT2,SERPING1,FAM176B,SEMA7A	EXTRACELLULAR_STRUCTURE_ORGANIZATION	1.66221	0.0369113
M107	COAD	4	127	M16	SYNPO2,MYH11,SCN7A,GNAO1,SYNM,ATP1A2	MUSCLE_CONTRACTION	1.66205	0.0372908
M114	COAD	4	61	M16	BOC,CLIP3,ANK2	SURFACTANT_HOMEOSTASIS	1.65473	0.039214
M354	COAD	5	102	M107	SYNPO2,MYH11,SCN7A,SYNM,ATP1A2	MUSCLE_CONTRACTION	1.65248	0.0412555
M33	COAD	4	11	M8	GOLGA6L1	NA	1.64479	0.0425666
M371	COAD	5	30	M116	CADM3,ANGPTL1	REGULATION_OF_MEMBRANE_POTENTIAL	1.63823	0.043051
M405	COAD	5	14	M143	CTHRC1	NA	1.63917	0.0440133
M387	COAD	5	11	M126	PLIN1	NA	1.62537	0.0452947
M394	COAD	5	10	M133	LTBP3	NA	1.62527	0.0476018
M37	COAD	4	75	M8	RALY,EIF6,CHMP4B,DYNLRB1,PSMA7	NA	1.62313	0.0480887
M152	COAD	4	72	M18	MAP3K12,ADAMTS10,IFFO1,NPR2,KCND1	REGULATION_OF_ION_TRANSMEMBRANE_TRANSPORT	1.61286	0.0484415
M117	COAD	4	36	M16	CDO1	KERATAN_SULFATE_CATABOLIC_PROCESS	1.61583	0.0486009
M411	COAD	5	15	M144	SPARCL1	NA	1.61536	0.0497171
M743	DLBC	3	16	M158	ANKRD24,SH3BP2	NA	13.4021	0.0171435
M332	DLBC	3	12	M27	BTBD9	NA	6.52282	0.0184542
M1120	DLBC	4	10	M420	CYP27A1	NA	0.0839792	0.0199245
M1075	DLBC	4	23	M379	LEPREL2	NA	0.0963795	0.0280429
M108	DLBC	2	44	M2	H2AFY2,MICALL2	NA	0.177254	0.0300873
M526	DLBC	3	43	M77	TEAD3,TGFB1I1	NA	0.0990682	0.0301075
M321	DLBC	3	63	M23	FTH1,SDSL,CD63	NA	0.180297	0.0326582
M981	DLBC	4	39	M321	FTH1,SDSL	NA	0.180297	0.0326582
M1209	DLBC	4	42	M501	PLAUR,C15orf48,SLC16A3	VENTRICULAR_SYSTEM_DEVELOPMENT	0.180333	0.032794
M1172	DLBC	4	10	M465	DUT	NA	0.181566	0.033452
M780	DLBC	4	27	M185	CTHRC1	REGULATION_OF_MORPHOGENESIS_OF_AN_EPITHELIUM	0.181566	0.033452
M1582	DLBC	5	21	M1209	PLAUR	REGULATION_OF_COAGULATION	0.183138	0.0344501
M71	DLBC	2	116	M2	KIFC3,PLAUR,TMEM51,MMP14	FIBRINOLYSIS	0.183138	0.0344501
M1104	DLBC	4	10	M411	LOC728643	NA	0.107802	0.0347131
M782	DLBC	4	16	M185	MMP2	NA	0.19293	0.0395339
M411	DLBC	3	25	M42	HNRNPA1L2,NCRNA00188	REGULATION_OF_MRNA_BINDING	0.116046	0.0410965
M185	DLBC	3	62	M5	CTHRC1,MMP2	EXTRACELLULAR_STRUCTURE_ORGANIZATION	0.196029	0.0414931
M1116	DLBC	4	21	M420	HSD17B14,APOE	NEGATIVE_REGULATION_OF_LIPID_BIOSYNTHETIC_PROCESS	0.193353	0.0415172
M380	DLBC	3	19	M36	EFEMP2,MXRA8	NA	0.196236	0.0417941
M501	DLBC	3	103	M71	KIFC3,PLAUR,TMEM51,MMP14	FIBRINOLYSIS	0.197804	0.0427184
M712	DLBC	3	10	M139	ETFA	NA	0.12399	0.0477236
M503	DLBC	3	43	M72	LOC100128811	NA	0.206626	0.049194
M983	DLBC	4	12	M322	RCN1	NA	0.20789	0.0498694
M370	ESCA	3	45	M54	COBRA1,URM1	NA	0.382367	0.00241823
M1107	ESCA	4	33	M370	COBRA1	NA	0.410554	0.00409978
M380	ESCA	3	14	M56		NA	2.33731	0.00447621
M489	ESCA	3	24	M79	ZFP36,DUSP1	RESPONSE_TO_RADIATION	2.23161	0.00807717
M79	ESCA	2	36	M1	ZFP36	RESPONSE_TO_OXIDATIVE_STRESS	2.13666	0.0119988
M1333	ESCA	4	11	M495	NAA50,ZBTB11	NA	2.03247	0.0150051
M706	ESCA	4	12	M143	PGC,FBP2	NA	0.492404	0.0189683
M318	ESCA	3	10	M41	PRUNE	NA	1.94939	0.0212002
M1665	ESCA	5	12	M952	TAF6	NA	0.522003	0.0289007
M198	ESCA	3	27	M24	EMD	NA	1.86118	0.0297969
M669	ESCA	4	10	M138	TCHHL1	NA	0.537355	0.0324013
M403	ESCA	3	28	M61	STAG2	PHOSPHATIDYLINOSITOL_DEPHOSPHORYLATION	1.86798	0.0334932
M320	ESCA	3	20	M41	PUM2	NA	1.86155	0.0344428
M54	ESCA	2	126	M1	COBRA1,SSNA1,C9orf114,DPM2	NA	0.533847	0.0351613
M1322	ESCA	4	15	M488		NA	1.87639	0.0358697
M1255	ESCA	4	12	M449	RPL7L1	NCRNA_METABOLIC_PROCESS	0.542336	0.0363125
M436	ESCA	3	46	M67		TRNA_METABOLIC_PROCESS	0.548151	0.0407673
M269	ESCA	3	33	M36	NKAP,RBMX2	NA	1.8029	0.0419199
M1203	ESCA	4	21	M419	BEX4	DICARBOXYLIC_ACID_CATABOLIC_PROCESS	1.78821	0.0431138
M756	ESCA	4	18	M168	CT45A1,CT45A2	NA	1.78194	0.0456478
M871	ESCA	4	12	M227	PDZK1IP1,LCN2	NA	0.560286	0.0493293
M310	GBM	4	11	M30	ZCCHC12	NA	1.92488	0.00132539
M69	GBM	3	13	M4	LOC286367	NA	1.82701	0.0024908
M218	GBM	3	38	M12	TANK,ARL1	NA	1.82919	0.00277951
M31	GBM	3	95	M4	SYN1,CPLX2,SYT5,SCN3B	REGULATION_OF_TRANS_SYNAPTIC_SIGNALING	1.79578	0.00309022
M32	GBM	3	25	M4	SYT13	SEROTONIN_RECEPTOR_SIGNALING_PATHWAY	1.77292	0.00430927
M98	GBM	3	75	M7	ERO1L,VEGFA,ADM,MAFF,SLC2A3	RESPONSE_TO_OXYGEN_LEVELS	1.73401	0.00478853
M313	GBM	4	12	M32	LOC285696	NA	1.70459	0.00783026
M141	GBM	3	24	M7	FPGT,CDC73	NUCLEAR_ENVELOPE_ORGANIZATION	0.594478	0.00834316
M366	GBM	4	15	M57	NCDN,KIAA0513	POST_GOLGI_VESICLE_MEDIATED_TRANSPORT	1.65513	0.00952627
M278	GBM	4	24	M20	PACSIN1	PERISTALSIS	1.62837	0.0120852
M473	GBM	4	18	M98	VEGFA	RESPONSE_TO_OXYGEN_LEVELS	1.63105	0.0122165
M34	GBM	3	27	M4		ANTERIOR_POSTERIOR_PATTERN_SPECIFICATION	1.62703	0.0127642
M1699	GBM	8	11	M1555	PLOD3	CHONDROITIN_SULFATE_BIOSYNTHETIC_PROCESS	1.61457	0.0127806
M79	GBM	4	49	M5	IL8,PI3	NEUTROPHIL_MIGRATION	1.59798	0.019077
M609	GBM	4	19	M141	FPGT,ACADM	NA	0.637015	0.0214796
M27	GBM	3	77	M4	GRIN1,CHD5,SLC12A5,HRNBP3,RLTPR	POTASSIUM_ION_TRANSPORT	1.5545	0.0236858
M94	GBM	4	58	M5	PGCP,MR1,STOM	NA	1.51998	0.0304778
M23	GBM	3	30	M4		RESPONSE_TO_ETHER	1.51462	0.0315548
M63	GBM	3	24	M4	SMPX,MARCH11,GABRG3	MELANIN_BIOSYNTHETIC_PROCESS	1.50424	0.0338026
M472	GBM	4	45	M98	ERO1L,SLC2A3,NDRG1	NEGATIVE_REGULATION_OF_GROWTH	1.50698	0.0352498
M57	GBM	3	31	M4	KIAA0513,KCNAB2	REGULATION_OF_PRESYNAPTIC_CYTOSOLIC_CALCIUM_ION_CONCENTRATION	1.50217	0.0356265
M1061	GBM	6	11	M441	IL1R1	NA	1.48851	0.0417436
M207	GBM	3	54	M12	ZNF282	NA	1.4855	0.0419523
M741	GBM	4	16	M197	ADRBK1,MAP3K11	POSITIVE_REGULATION_OF_MAP_KINASE_ACTIVITY	1.47295	0.0456768
M317	GBM	4	14	M34	HOXC11,HOXC10	REGIONALIZATION	1.46991	0.0485588
M459	GBM	5	31	M94	PGCP	NA	1.46287	0.0490777
M1374	HNSC	6	91	M749	IKZF1,ZNF831,PPP1R16B,ITK,GVIN1	T_CELL_ACTIVATION	0.556788	3.61516e-05
M749	HNSC	5	120	M188	IKZF1,ZNF831,GVIN1,PPP1R16B,ITK,SLAMF6,RASSF2,BTLA	T_CELL_ACTIVATION	0.560126	4.44429e-05
M70	HNSC	4	31	M12	CAV1,IGF2BP2	REGULATION_OF_CELLULAR_RESPONSE_TO_DRUG	1.76357	5.84705e-05
M1048	HNSC	6	19	M427	CIRH1A,NIP7	NA	1.74632	8.42808e-05
M105	HNSC	4	23	M15	ZNF799	NA	0.580269	0.000121079
M1623	HNSC	7	23	M1387	CXCR5,CD19,MS4A1	B_CELL_PROLIFERATION	0.602868	0.000362083
M619	HNSC	5	14	M132	WDR43,LRPPRC,PNPT1	MITOCHONDRIAL_GENE_EXPRESSION	1.64597	0.00043803
M1387	HNSC	6	28	M761	CXCR5,CD19,MS4A1	B_CELL_ACTIVATION	0.61101	0.000499894
M139	HNSC	4	22	M15	VAPA	NA	1.61153	0.00070345
M761	HNSC	5	49	M190	CXCR5,FCRL1,MS4A1	B_CELL_ACTIVATION	0.623117	0.000815136
M345	HNSC	5	21	M60	FAM176A	NA	1.59708	0.000849372
M466	HNSC	5	16	M94	DCAF13	MATURATION_OF_SSU_RRNA_FROM_TRICISTRONIC_RRNA_TRANSCRIPT_SSU_RRNA_5_8S_RRNA_LSU_RRNA_	1.58059	0.00109012
M1380	HNSC	6	41	M756	TBC1D10C,ARHGAP9	RESPIRATORY_BURST	0.631157	0.00111043
M1385	HNSC	6	40	M760	CD79A,FCRL5,TNFRSF17,MGC29506	NA	0.631438	0.00114597
M755	HNSC	5	122	M189	CD3E,NKG7,CD2,SH2D1A,CD8A	T_CELL_ACTIVATION	0.6349	0.00125426
M98	HNSC	4	45	M15	PHF6,STAG2	NA	1.58316	0.00126781
M181	HNSC	4	17	M15		NA	1.57066	0.00131883
M111	HNSC	4	15	M15		NEURON_PROJECTION_ORGANIZATION	1.56316	0.00152685
M551	HNSC	5	20	M112	SLC38A7,LONP2	NA	1.5594	0.00156546
M442	HNSC	5	12	M90	C17orf79	VACUOLE_ORGANIZATION	1.55614	0.0015868
M190	HNSC	4	105	M17	CD79A,CXCR5,FAM46C,FCRL1,MS4A1,FCRL5,CD19,TNFRSF17	B_CELL_ACTIVATION	0.640689	0.00167625
M427	HNSC	5	41	M85	DDX19A	NA	1.55466	0.00170566
M1378	HNSC	6	83	M755	CD3E,CD2,SH2D1A	T_CELL_ACTIVATION	0.645758	0.00186189
M1485	HNSC	7	23	M923	LMOD2	MUSCLE_SYSTEM_PROCESS	1.55128	0.00197959
M189	HNSC	4	278	M17	CD3E,TBC1D10C,SEPT1,CD2,MAP4K1,NKG7,LAT,PTPRCAP,NLRC3,SH2D1A,CD8A,ARHGAP9	T_CELL_ACTIVATION	0.647802	0.00204197
M85	HNSC	4	105	M13	NUTF2,COX4NB,DDX19A,NIP7	ESTABLISHMENT_OF_RNA_LOCALIZATION	1.51767	0.00287345
M260	HNSC	4	19	M35	SPSB3,NARFL	NA	0.662532	0.00348822
M923	HNSC	6	54	M352	LMOD2,CSRP3	MUSCLE_CONTRACTION	1.50649	0.0036691
M236	HNSC	4	16	M28	LOC100128842	NA	0.662901	0.00367205
M4	HNSC	2	2296	M1	DOCK2,NCKAP1L,CD53,IKZF1,SASH3,CD3E,IL17REL,TBC1D10C,LAIR1,SEPT1,PTPRC,SYCP2,FXYD6,VCAM1,ARHGEF6,MGAT3,ZFR2,ZNF853,BCL2,GBP4,PARM1,TYROBP,MYO1F,CD2,CYBB,DOK1,RNF150,FAM171A1,ZNF831,EVI2B,GPRIN3,STAG3,GVIN1,POU6F1,CACNA2D2,WAS,PLCL2,LAPTM5,GBP1,BEND5,MAP4K1,NKG7,IFIT3,PSMB9,C5orf56,NR3C2,IL17RB,XKR4,CD79A,SLC7A7,TAP1,IRF1,NBEA,RGAG4,FCER1G,IRF8,SPI1,C3AR1,GMFG,CXCR5,TRIM22,APOL3,TCAM1P,MCF2L,BEX2,…	T_CELL_ACTIVATION	0.665489	0.00370817
M227	HNSC	4	11	M27	UTY	NA	0.665101	0.00385274
M404	HNSC	5	15	M82	RBMX2,NDUFA1	NA	1.49359	0.0043206
M893	HNSC	6	12	M292		NA	0.674287	0.00480351
M725	HNSC	5	10	M179		NA	1.48376	0.00481003
M925	HNSC	6	51	M352	ARPP21,CAV3,MURC	MUSCLE_ORGAN_DEVELOPMENT	1.48441	0.00484526
M1373	HNSC	6	11	M748	GIMAP6	NA	0.67392	0.00487733
M1050	HNSC	6	11	M427	DDX19A	NA	1.48453	0.0049127
M12	HNSC	3	292	M2	ACTN1,INHBA,CAV1,SERPINE1,LAMC2,ITGA3,TGFBI,ITGA5,PXN,TNFRSF12A,FSTL3,LAMA3	HEMIDESMOSOME_ASSEMBLY	1.47442	0.00546196
M401	HNSC	5	35	M82	PHB,CCT7	MITOCHONDRIAL_TRANSLATIONAL_TERMINATION	1.47291	0.00553307
M750	HNSC	5	16	M188	CPA3,MS4A2	REGULATION_OF_ANGIOTENSIN_LEVELS_IN_BLOOD	0.678152	0.00565081
M987	HNSC	6	12	M392	EIF2S1,MED6	NA	1.4685	0.00593338
M756	HNSC	5	128	M189	SEPT1,TBC1D10C,MAP4K1,LAT,NLRC3,PTPRCAP,ARHGAP9	RESPIRATORY_BURST	0.681479	0.00624559
M765	HNSC	5	50	M193	C5orf56,TNFRSF14,IRF1	CYTIDINE_TO_URIDINE_EDITING	0.6823	0.00641057
M109	HNSC	4	58	M15	ZNF493,ZNF253,ZNF737	DNA_INTEGRATION	0.682708	0.00647631
M373	HNSC	5	18	M78	EMG1,MLF2	RRNA_BASE_METHYLATION	1.45927	0.00673957
M924	HNSC	6	87	M352	HFE2,C10orf71,PPP1R3A,DUSP26,MYH4	MUSCLE_SYSTEM_PROCESS	1.45789	0.00702861
M188	HNSC	4	691	M17	DOCK2,NCKAP1L,CD53,IKZF1,SASH3,PTPRC,ARHGEF6,EVI2B,GPRIN3,ZNF831,CYBB,MYO1F,GVIN1,WAS,IRF8,PLCL2,PIK3CG,ITK,SLAMF6,CD79B,WIPF1,GPSM3,HLA.DPB1,LCP2,PPP1R16B,IL10RA,PLXNC1,RASSF2,HLA.DMB,GIMAP4,BTK,CPA3,BTLA,MS4A2,P2RY10,EVI2A,CSF1R,SLCO2B1,P2RY8,RGAG4	T_CELL_ACTIVATION	0.686429	0.00722834
M613	HNSC	5	13	M130	CRAMP1L,SRRM2	NA	0.687429	0.00729847
M431	HNSC	5	20	M87	GAK,CTBP1	NA	0.687082	0.00741548
M71	HNSC	4	80	M12	ACTN1	SUBSTRATE_DEPENDENT_CELL_MIGRATION	1.45482	0.00747085
M760	HNSC	5	56	M190	CD79A,FAM46C,FCRL5,TNFRSF17	NEGATIVE_REGULATION_OF_RESPONSE_TO_ENDOPLASMIC_RETICULUM_STRESS	0.687153	0.00767456
M368	HNSC	5	25	M73	ITGA3	TISSUE_MIGRATION	1.44741	0.00808735
M446	HNSC	5	23	M90	ATAD2B,AFTPH	PROGRAMMED_NECROTIC_CELL_DEATH	0.690658	0.00809662
M1454	HNSC	6	31	M830	ZBTB7C,C20orf151	SODIUM_ION_TRANSMEMBRANE_TRANSPORT	0.691368	0.00834986
M44	HNSC	4	24	M8	CHPF	COLLAGEN_METABOLIC_PROCESS	1.44683	0.00840096
M575	HNSC	5	14	M118	ZNF236	SECONDARY_PALATE_DEVELOPMENT	0.693993	0.00898913
M988	HNSC	6	12	M392	FCF1	NA	1.43935	0.00924898
M352	HNSC	5	305	M64	HFE2,LMOD2,SMYD1,C10orf71,C20orf166,LDB3,CSRP3,ARPP21,ASB5,PPP1R3A,HHATL,MYOM1,YIPF7,CAV3,DUSP26	MUSCLE_SYSTEM_PROCESS	1.43703	0.00951042
M35	HNSC	3	36	M7	NARFL,SPSB3	NA	0.696399	0.01006
M1662	HNSC	8	21	M1506	C14orf153,SIVA1	NA	1.42825	0.0105124
M1506	HNSC	7	25	M983	C14orf153,SIVA1	NA	1.4251	0.0109632
M27	HNSC	3	25	M7		NA	0.700507	0.0110193
M406	HNSC	5	24	M82	PSMG3	NA	1.42374	0.0112577
M1198	HNSC	6	19	M541	ZNF493	NA	0.701607	0.0113596
M392	HNSC	5	27	M80	FCF1	NA	1.42215	0.0116149
M1375	HNSC	6	10	M749	GPR174	NA	0.704562	0.012052
M983	HNSC	6	30	M391	C14orf153	NA	1.41606	0.0124896
M638	HNSC	5	11	M138	KIAA0391	NA	1.41732	0.012516
M979	HNSC	6	25	M390	CTNNBL1,C20orf4	NA	1.41615	0.0125827
M1093	HNSC	6	10	M446	ATAD2B	NA	0.706088	0.0128629
M985	HNSC	6	17	M391	SSB	TRNA_TRANSPORT	1.4148	0.0132752
M76	HNSC	4	10	M12	RAB1A,DUSP11	NA	1.40641	0.0145132
M541	HNSC	5	34	M109	ZNF493,ZNF737	NA	0.710936	0.0145656
M28	HNSC	3	303	M7	LOC91316,AHSA2,PILRB,MDM4,AGAP6,AGAP4,GOLGA8A,PABPC1L,NCRNA00201,LOC100128842,LENG8,RPL32P3,MST1P2,PPP1R3E,CHKB.CPT1B,AMY2B,ZNF10,LOC100132287	NA	0.711634	0.0154185
M700	HNSC	5	17	M166	GTF2F2,MED4	NA	1.40126	0.015431
M1575	HNSC	7	15	M1198	ZNF493	NA	0.712718	0.0154416
M328	HNSC	5	32	M56	CALU	AMINO_SUGAR_METABOLIC_PROCESS	1.4006	0.0159763
M331	HNSC	5	18	M56	PRSS23	NA	1.39804	0.016431
M9	HNSC	3	487	M2	HFE2,LMOD2,C10orf71,SMYD1,MEF2C,C20orf166,LDB3,CSRP3,ARPP21,MYOM1,PYGM,MYH4,PGM5,PPP1R3A,ASB5,HHATL,ASB11,SYNPO2,ANK2,YIPF7,CHRND,CAV3,ASB15,MURC,CASQ1,DUSP26,IGF1,CABC1	MUSCLE_SYSTEM_PROCESS	1.39714	0.0166113
M73	HNSC	4	31	M12	ITGA3	TISSUE_MIGRATION	1.39541	0.0168135
M64	HNSC	4	396	M9	HFE2,LMOD2,C10orf71,SMYD1,C20orf166,LDB3,CSRP3,ARPP21,MYOM1,PYGM,MYH4,PPP1R3A,ASB5,HHATL,ASB11,YIPF7,CAV3,ASB15,CASQ1,DUSP26,CABC1	MUSCLE_SYSTEM_PROCESS	1.3959	0.0168166
M367	HNSC	5	23	M68	ITGA5,SERPINE1	PHAGOLYSOSOME_ASSEMBLY	1.39678	0.0171458
M152	HNSC	4	42	M15		PROTEIN_FOLDING_IN_ENDOPLASMIC_RETICULUM	1.39459	0.0172379
M1614	HNSC	7	93	M1368	DOCK2,PTPRC,NCKAP1L,EVI2B	ALPHA_BETA_T_CELL_ACTIVATION	0.717051	0.0173405
M138	HNSC	4	77	M15	EXOC5,PPP2R5E	NA	1.39324	0.0176091
M544	HNSC	5	10	M110	AURKA,PLK1	NA	1.39248	0.0176127
M1376	HNSC	6	15	M752	CD1A	ANTIGEN_PROCESSING_AND_PRESENTATION_VIA_MHC_CLASS_IB	0.719289	0.0182774
M134	HNSC	4	33	M15	ADSL,XRCC6	NA	1.38772	0.0189574
M364	HNSC	5	22	M67	SELP,DARC	NA	0.720384	0.0189995
M1272	HNSC	6	11	M603	TEX264	NA	0.719004	0.0195028
M329	HNSC	5	13	M56	C12orf23,KDELR3,P4HA1	NA	1.38514	0.0197681
M505	HNSC	5	36	M98	PHF6,STAG2	POSITIVE_REGULATION_OF_DENDRITE_DEVELOPMENT	1.3901	0.020032
M142	HNSC	4	59	M15	ZFP14,ZNF566	NA	0.72252	0.0202162
M418	HNSC	5	18	M82	CCDC58	NA	1.38452	0.0209529
M1405	HNSC	6	30	M765	C5orf56,IRF1,UBD	NATURAL_KILLER_CELL_DIFFERENTIATION	0.725023	0.021505
M508	HNSC	5	12	M99	TCP1	MITOCHONDRIAL_TRANSLATION	1.37859	0.0215274
M1461	HNSC	6	18	M831	TXNRD1	COFACTOR_METABOLIC_PROCESS	1.37919	0.0215565
M1459	HNSC	6	20	M831	ALDH3A1,PGD	XENOBIOTIC_METABOLIC_PROCESS	0.725503	0.0217451
M1360	HNSC	6	21	M746	HLA.DMB,HLA.DPB1,HLA.DRA	NA	0.726604	0.0220102
M68	HNSC	4	68	M12	INHBA,SERPINE1,ITGA5	EXTRACELLULAR_STRUCTURE_ORGANIZATION	1.37713	0.022181
M101	HNSC	4	42	M15	FAM3A,EMD	NA	1.37477	0.0226856
M520	HNSC	5	33	M101	FAM3A,EMD	SEMAPHORIN_PLEXIN_SIGNALING_PATHWAY_INVOLVED_IN_NEURON_PROJECTION_GUIDANCE	1.3737	0.0229581
M1149	HNSC	6	21	M505	STAG2	NA	1.37482	0.0234641
M670	HNSC	5	36	M151	BRMS1,YIF1A	NA	1.37017	0.024316
M419	HNSC	5	14	M82	EIF3B	XENOPHAGY	1.36755	0.0244856
M1128	HNSC	6	11	M472	WBP11P1,WBP11	NA	1.37294	0.0247582
M166	HNSC	4	28	M15	SAP18	NA	1.36666	0.0248159
M747	HNSC	5	228	M188	DOCK2,ARHGEF6,NCKAP1L,GPRIN3,PTPRC,PLCL2,PIK3CG,WIPF1,EVI2B,PLXNC1	LYMPHOCYTE_DIFFERENTIATION	0.730866	0.0248445
M1052	HNSC	6	45	M428	NUTF2	NA	1.36632	0.0250808
M426	HNSC	5	23	M84	HIST1H1B	CHROMATIN_ASSEMBLY	1.3657	0.0255325
M290	HNSC	5	12	M41	FNDC3B,LAMC1	NA	1.36435	0.0265734
M491	HNSC	5	11	M95	RNF4,ADD1	NA	0.735096	0.0271154
M80	HNSC	4	235	M13	C14orf156,COX16,ATP5E,ROMO1,C14orf153,APEX1,DNTTIP1	TRNA_PROCESSING	1.36022	0.0272114
M1510	HNSC	7	12	M985	METTL5	NA	1.3596	0.0284971
M978	HNSC	6	17	M390	DNTTIP1,C20orf43	NA	1.35582	0.0286136
M143	HNSC	4	42	M15	ZNF12,KLHL7,SNX13	NA	1.35557	0.0293184
M1094	HNSC	6	10	M446	AFTPH	NA	0.73984	0.030623
M193	HNSC	4	105	M18	GBP4,C5orf56,IRF1,TNFRSF14,APOL3	DEFENSE_RESPONSE_TO_VIRUS	0.739852	0.0308226
M74	HNSC	4	16	M12	FSTL3	NA	1.3507	0.0308352
M771	HNSC	5	14	M196	GLTP	CELLULAR_KETONE_BODY_METABOLIC_PROCESS	0.740381	0.031675
M603	HNSC	5	28	M127	NPRL2,TEX264	CELL_CYCLE_ARREST	0.74085	0.0319403
M1361	HNSC	6	75	M746	SASH3,WAS,IRF8	LEUKOCYTE_MIGRATION	0.741866	0.0325003
M533	HNSC	5	39	M104	MRPS34	POSITIVE_REGULATION_OF_PROTEIN_MODIFICATION_BY_SMALL_PROTEIN_CONJUGATION_OR_REMOVAL	1.34358	0.033825
M1368	HNSC	6	120	M747	DOCK2,NCKAP1L,PTPRC,EVI2B	LYMPHOCYTE_DIFFERENTIATION	0.745645	0.0355421
M118	HNSC	4	217	M15	NR2C2,CASP8AP2,EXOSC4,BDP1,SHARPIN,ERBB2IP,PIKFYVE,PKN2,RBBP4,ZNF236,ZNF644,DCK,GIGYF2	NA	0.745593	0.0356083
M384	HNSC	5	11	M78	BCAT2	NA	0.745419	0.0357148
M678	HNSC	5	13	M154	CHERP,ILF3	POSITIVE_REGULATION_BY_HOST_OF_VIRAL_TRANSCRIPTION	0.744952	0.0360454
M1016	HNSC	6	16	M409	ICT1	REGULATION_OF_CELLULAR_PROTEIN_CATABOLIC_PROCESS	1.33715	0.0367868
M680	HNSC	5	13	M155	C11orf57	NA	1.33743	0.0376897
M648	HNSC	5	32	M142	ZFP14	NA	0.748519	0.037863
M128	HNSC	4	65	M15	WDR82,QRICH1	NA	0.750085	0.0388096
M524	HNSC	5	12	M102	VPS26A	NA	1.3311	0.0402695
M30	HNSC	3	78	M7	TTLL3,SEC31B,ZNF767,MYO15B	NA	0.752048	0.0422175
M423	HNSC	5	13	M83	SAFB,RANBP3	DNA_TEMPLATED_TRANSCRIPTION_ELONGATION	0.754466	0.0430221
M1056	HNSC	6	26	M429	IRF2BP1,ZNF446,TBC1D17	POSITIVE_REGULATION_OF_TRIGLYCERIDE_LIPASE_ACTIVITY	0.755767	0.0441675
M563	HNSC	5	19	M115	KIAA0528,MBTD1	NA	0.755361	0.0442275
M912	HNSC	6	27	M328	CALU	RETINA_VASCULATURE_MORPHOGENESIS_IN_CAMERA_TYPE_EYE	1.32349	0.0447995
M624	HNSC	5	22	M134	ADSL,THOC5	ESTABLISHMENT_OF_PROTEIN_LOCALIZATION_TO_MITOCHONDRIAL_MEMBRANE	1.32016	0.0460202
M7	HNSC	2	1436	M1	LOC91316,CDK3,AHSA2,ZNF767,PILRB,TTLL3,NKTR,WASH7P,SNHG12,ZMAT1,ZNF692,LOC338799,SFRS18,BZRAP1,CCNL2,GLS2,ZNF37B,P4HTM,YPEL1,AGAP4,ANKS3,C16orf79,NCRNA00201,MDM4,PARD6A,AGAP6,NPIPL3,GOLGA8A,NSUN5P2,LOC200030,C2orf64,LOC400752,SLC29A2,MYO15B,PABPC1L,SEC31B,C12orf47,CCDC57,LOC100190986,HERC2P2,GCFC1,SNHG10,TCTE3,WBP1,LOC147727,C16orf59,LOC100128842,LENG8,YJEFN3,SUZ12P,LOC286367,UBXN11,RPL32P3,FLJ45…	SENSORY_PERCEPTION_OF_LIGHT_STIMULUS	0.756601	0.0462908
M183	HNSC	4	38	M15	CD164,CCNC	NA	1.31822	0.0467005
M233	HNSC	4	100	M28	LOC91316,NCRNA00201,CHKB.CPT1B	NA	0.757	0.0467542
M722	HNSC	5	14	M177	C15orf44	NA	1.31803	0.0471198
M112	HNSC	4	101	M15	LEPROT,ELK3,SLC38A7	NA	1.31904	0.0478571
M17	HNSC	3	1422	M4	DOCK2,NCKAP1L,CD53,IKZF1,SASH3,CD3E,TBC1D10C,LAIR1,SEPT1,PTPRC,ARHGEF6,TYROBP,MYO1F,CD2,CYBB,DOK1,ZNF831,EVI2B,GPRIN3,GVIN1,WAS,LAPTM5,MAP4K1,NKG7,CD79A,SLC7A7,FCER1G,IRF8,SPI1,C3AR1,GMFG,CXCR5,PLCL2,LAT,FAM46C,FCGR2A,PIK3CG,ITK,C1QC,SLAMF6,PPP1R16B,LILRB4,FCRL1,LAX1,CD79B,WIPF1,ARHGAP9,GPSM3,PLEKHO1,PTPRCAP,HLA.DPB1,LCP2,MS4A1,NLRC3,DUSP1,TNFSF12,FCRL5,SH2D1A,ITGAX,IL10RA,CD8A,CD19,PLXNC1,RASSF2…	T_CELL_ACTIVATION	0.759218	0.0484353
M37	HNSC	3	47	M7	P4HTM,PARD6A,ATP6V0E2	NA	0.759612	0.0487768
M210	HNSC	4	22	M21	F2RL1	COLLAGEN_ACTIVATED_TYROSINE_KINASE_RECEPTOR_SIGNALING_PATHWAY	1.31639	0.048961
M151	HNSC	4	43	M15	BRMS1,YIF1A	NA	1.31564	0.0494303
M652	HNSC	5	18	M143	SNX13	NA	1.31521	0.0495489
M1125	KICH	5	14	M423	C19orf6,GNA13	NA	0.0893697	0.0231234
M839	KICH	5	26	M226	HSD11B2	NA	0.0912216	0.0245877
M492	KICH	4	30	M78	LOC100302650	RESPONSE_TO_HYDROGEN_PEROXIDE	0.092652	0.0250361
M226	KICH	4	32	M30	HSD11B2,PLLP	NA	0.0945594	0.026618
M423	KICH	4	28	M61		NA	0.095088	0.026753
M337	KICH	4	139	M52	FAM3A,FAM195A,FAM58A,DCI,TMEM129	PROTEASOMAL_PROTEIN_CATABOLIC_PROCESS	0.0947077	0.0269945
M614	KICH	4	18	M136	OSBPL11,LZIC	REGULATION_OF_SEQUESTERING_OF_TRIGLYCERIDE	9.97556	0.0304771
M256	KICH	4	13	M32	DLD	NA	9.95326	0.0306161
M86	KICH	3	22	M10	BRIP1,PRR11	DNA_REPLICATION	9.87287	0.0311524
M1048	KICH	5	58	M384	NUBP2,WDR24	TOR_SIGNALING	0.104412	0.0333946
M1558	KICH	6	44	M1048	NUBP2	NA	0.104412	0.0333946
M1742	KICH	7	33	M1558	NUBP2	NA	0.104412	0.0333946
M126	KICH	3	18	M12	MARK2,KDM2A,CPSF7	NA	9.53374	0.0335677
M650	KICH	4	29	M141	RINT1,TRRAP	HISTONE_H2A_ACETYLATION	9.53124	0.0335883
M447	KICH	4	22	M66	PTPRB,TEK,TM4SF18	POSITIVE_REGULATION_OF_PHOSPHATIDYLINOSITOL_3_KINASE_SIGNALING	0.105092	0.0337601
M526	KICH	4	25	M99	NIPBL	NA	9.42924	0.0345883
M1559	KICH	6	11	M1048	ZNF500,ZNF646	NA	0.106638	0.0350722
M457	KICH	4	11	M70	FAM167B	NA	0.106995	0.0353064
M229	KICH	4	20	M30		NA	0.107213	0.0354336
M387	KICH	4	39	M56	FBRS,RNPS1	POSITIVE_REGULATION_OF_CHROMOSOME_ORGANIZATION	0.107121	0.0354695
M56	KICH	3	126	M6	FBRS,EDC4,CHMP1A,DEF8,C16orf7	NA	0.108934	0.0367853
M1053	KICH	5	13	M386	CHMP1A	NA	0.11008	0.0376689
M645	KICH	4	19	M141	GTPBP10	NA	9.03347	0.038035
M887	KICH	5	13	M251	EFHD1	NA	0.112863	0.0398324
M843	KICH	5	15	M229		NA	0.113406	0.0403096
M30	KICH	3	319	M5	PLA2G4F,CLCNKB,HSD11B2,CLCNKA,INPP5J,PLLP,PVALB,DLG3,ANKRD56,CDH1,FA2H,PKP2,LLGL2,NDRG2,ELMO3,SLC29A2,IDH2	MONOCARBOXYLIC_ACID_METABOLIC_PROCESS	0.114266	0.0410151
M232	KICH	4	33	M30	ELMO3,ESRP2	NA	0.115363	0.0420141
M99	KICH	3	46	M11	NIPBL,BDP1	NA	8.64647	0.0423005
M389	KICH	4	54	M56	EDC4,DEF8	NA	0.116007	0.0423857
M1195	KICH	5	11	M492	NR4A1,ZNF548	NA	0.196973	0.0432562
M386	KICH	4	22	M56	CHMP1A	NA	0.118245	0.044241
M1185	KICH	5	12	M477	RAD18	NA	8.45237	0.0445892
M1643	KICH	6	18	M1268	PHTF1,OSBPL9	NA	5.01985	0.0449933
M477	KICH	4	27	M75	KIAA1524,RAD18,ECT2	DNA_DAMAGE_RESPONSE_DETECTION_OF_DNA_DAMAGE	8.30138	0.0462623
M231	KICH	4	16	M30	COQ9,GPRC5C	NA	0.1211	0.0466291
M582	KICH	4	24	M131	SDR39U1	NA	0.205383	0.0493059
M453	KIRC	4	63	M101	ARFGAP1,NPEPL1	NA	3.42303	7.69796e-13
M1317	KIRC	7	17	M749	BMP1,TMEM44	NA	3.40998	9.39253e-13
M1054	KIRC	5	12	M440	CCDC137	NA	3.28437	2.46803e-12
M1060	KIRC	5	47	M443	ANKRD13D,ABCC10	NA	3.16861	1.05877e-11
M1521	KIRC	8	21	M1320	NUMBL	COLLAGEN_CATABOLIC_PROCESS	3.09596	1.75754e-11
M443	KIRC	4	59	M101	ANKRD13D,ABCC10	NA	3.08614	2.07165e-11
M440	KIRC	4	20	M101	C17orf70	NA	3.09102	2.27249e-11
M1075	KIRC	5	23	M453	ARFGAP1	NA	3.07183	2.69659e-11
M1076	KIRC	5	21	M453	NPEPL1	NA	3.02951	3.13494e-11
M487	KIRC	4	45	M102	KIF18B,AURKB	ORGANELLE_FISSION	3.00802	4.43163e-11
M119	KIRC	3	78	M9	FBXO3,SUCLA2,ALDH6A1,MUT,ACADM	SMALL_MOLECULE_CATABOLIC_PROCESS	0.327721	5.48325e-11
M252	KIRC	4	45	M45	GBA3,GIPC2	NA	0.335936	7.23008e-11
M319	KIRC	4	53	M73	ADRM1,ZNF668	RIBOSOME_BIOGENESIS	3.04656	9.87765e-11
M1315	KIRC	7	39	M749	LEPRE1,SERPINH1	CHONDROCYTE_DEVELOPMENT_INVOLVED_IN_ENDOCHONDRAL_BONE_MORPHOGENESIS	2.94536	1.03534e-10
M749	KIRC	6	77	M214	LEPRE1,TIMP1,BMP1,RIN1,GLT25D1	PROTEIN_HETEROTRIMERIZATION	2.9102	1.53806e-10
M391	KIRC	4	47	M87	PCBP4,TLR3,CIDECP	NA	0.343063	1.74045e-10
M1468	KIRC	6	10	M1075	ARFGAP1	NA	2.89237	2.09833e-10
M1320	KIRC	7	32	M750	NUMBL,KCND1	COLLAGEN_CATABOLIC_PROCESS	2.87787	2.75429e-10
M489	KIRC	4	15	M102	ORC6L,C12orf32,UBE2T	NA	2.86492	3.09191e-10
M754	KIRC	6	43	M215	TFF1,SPDEF,SCGB2A2	TISSUE_HOMEOSTASIS	2.79792	5.09494e-10
M50	KIRC	3	23	M6	C1orf210,MAP7	CYTOSKELETAL_ANCHORING_AT_PLASMA_MEMBRANE	0.362836	6.12851e-10
M441	KIRC	4	67	M101	AMAC1,CRX,NANOS2,RP1.177G6.2	SENSORY_PERCEPTION_OF_LIGHT_STIMULUS	2.78973	6.93064e-10
M753	KIRC	6	35	M215	MAGEA6,PAGE5	NA	2.77157	6.94148e-10
M877	KIRC	5	11	M319	GPR172A	NA	2.81041	7.49061e-10
M710	KIRC	6	11	M186	TRAF5,XAF1	NA	2.75975	8.56574e-10
M879	KIRC	5	25	M319	ZNF668	NA	2.80211	8.64455e-10
M45	KIRC	3	53	M6	GBA3,GIPC2	REGULATION_OF_ION_TRANSMEMBRANE_TRANSPORT	0.364929	9.66497e-10
M1120	KIRC	5	10	M503	C4orf12	NA	0.360798	1.11726e-09
M944	KIRC	5	26	M370	SH3BGRL3,RHOG	NA	2.76125	1.15876e-09
M254	KIRC	4	54	M46	LRP2	ORGANIC_ANION_TRANSPORT	0.365684	1.1667e-09
M265	KIRC	4	11	M50	C1orf210,ANKRD56	NA	0.373076	1.64194e-09
M967	KIRC	5	16	M388	ATP6V1C2,CEL	MONOVALENT_INORGANIC_CATION_HOMEOSTASIS	2.74869	1.71719e-09
M971	KIRC	5	17	M391	PCBP4	NA	2.71242	1.71881e-09
M750	KIRC	6	82	M214	PDLIM7,NUMBL,SPEG,KCND1,COL7A1	POSITIVE_REGULATION_OF_SYNAPTIC_TRANSMISSION_GLUTAMATERGIC	2.68886	1.81942e-09
M1520	KIRC	8	19	M1315	SERPINH1	CHONDROCYTE_DEVELOPMENT_INVOLVED_IN_ENDOCHONDRAL_BONE_MORPHOGENESIS	2.66034	2.12951e-09
M370	KIRC	4	69	M80	SH3BGRL3,HN1,S100A11,ARPC3	ORGANELLE_FUSION	2.69397	3.53489e-09
M503	KIRC	4	18	M103	WDR31,C4orf12	NA	0.369793	3.89234e-09
M732	KIRC	6	19	M212	IGDCC4	SYNAPTIC_TRANSMISSION_CHOLINERGIC	2.60381	4.12306e-09
M326	KIRC	4	18	M73	PHKG2,SNHG11	NA	2.66621	4.35083e-09
M371	KIRC	4	52	M80	TMSB10,LGALS1	RESPONSE_TO_TYPE_I_INTERFERON	2.63419	4.66534e-09
M361	KIRC	4	22	M78	BCL2L12,UBE2S	NEGATIVE_REGULATION_OF_PEPTIDASE_ACTIVITY	2.63457	5.35554e-09
M486	KIRC	4	69	M102	CCNB2,TPX2,CDCA8	ORGANELLE_FISSION	2.61219	5.39335e-09
M321	KIRC	4	21	M73	TXNDC17,NME1	NUCLEOSIDE_PHOSPHATE_METABOLIC_PROCESS	2.6252	6.01101e-09
M185	KIRC	5	36	M20	KIAA1949,PLEKHO1,FXYD5,SIPA1	NA	2.58445	6.55612e-09
M87	KIRC	3	83	M7	PCBP4,ZBTB47,TLR3,SMARCD3,DBN1	NA	2.58609	7.12089e-09
M1385	KIRC	7	17	M792	NR3C2	I_KAPPAB_KINASE_NF_KAPPAB_SIGNALING	0.384557	7.12792e-09
M215	KIRC	5	90	M31	TFF1,MAGEA6,SPDEF,FOXA1	CORNIFICATION	2.57051	8.46475e-09
M497	KIRC	4	32	M103	APOOL,TMEM184C,MSI2	NA	0.383459	9.31731e-09
M447	KIRC	4	52	M101	MYADML,BPESC1	CELLULAR_RESPONSE_TO_ELECTRICAL_STIMULUS	2.55126	9.36279e-09
M1316	KIRC	7	13	M749	TIMP1	NA	2.5397	1.12202e-08
M1104	KIRC	5	41	M486	CCNB2	ORGANELLE_FISSION	2.53996	1.23565e-08
M914	KIRC	5	26	M349	ZNF579	NA	2.57313	1.26924e-08
M349	KIRC	4	40	M75	ZNF579,PRR24	NA	2.56852	1.38364e-08
M428	KIRC	4	66	M101	LUC7L,AFG3L1,NPIPL3	NA	2.54831	1.51839e-08
M970	KIRC	5	17	M391	TLR3,MIA2	MDA_5_SIGNALING_PATHWAY	0.397149	1.67156e-08
M86	KIRC	3	112	M7	FBN3,MOG,LRRTM1,SPINK7,STXBP5L,ATP6V1C2,KLK3	SECRETION_BY_TISSUE	2.51191	1.83825e-08
M946	KIRC	5	36	M371	TMSB10,LGALS1	POSITIVE_REGULATION_OF_PROTEIN_OLIGOMERIZATION	2.50955	2.1541e-08
M38	KIRC	3	23	M6	PKHD1	NA	0.402499	2.26226e-08
M1287	KIRC	7	14	M730	SRPX2	NA	2.46806	2.28939e-08
M1308	KIRC	7	48	M746	GFPT2,STEAP3,PTPRH,MFI2	NA	2.4551	2.36826e-08
M200	KIRC	5	15	M26	IMPDH1	NA	2.46719	2.41465e-08
M445	KIRC	4	55	M101	CNOT3,GLTSCR1	REGULATION_OF_MRNA_PROCESSING	2.45668	2.45931e-08
M80	KIRC	3	132	M7	SH3BGRL3,TMSB10,HN1,LGALS1,S100A11,ARPC3	STRESS_RESPONSE_TO_METAL_ION	2.48946	2.80649e-08
M1313	KIRC	7	12	M748	INHA	NA	2.4813	2.8454e-08
M730	KIRC	6	62	M212	ADAM12,SRPX2,TMEM158	OSSIFICATION	2.44345	3.00515e-08
M1268	KIRC	7	54	M723	C1R,C1S	COMPLEMENT_ACTIVATION	2.44541	3.50556e-08
M46	KIRC	3	97	M6	LRP2,UGT2A3,PRUNE2,RGL1	NA	0.408554	3.80229e-08
M54	KIRC	3	13	M6	HMGA2,DCBLD2,RPSAP52	NA	2.41257	4.04311e-08
M723	KIRC	6	83	M212	C1R,C1S,PLTP,CFB	COMPLEMENT_ACTIVATION	2.42273	4.40273e-08
M214	KIRC	5	280	M31	PDLIM7,TAGLN,LEPRE1,TPM2,TIMP1,NUMBL,FHL3,COL6A2,MEIS3,DACT3,SPEG,BMP1,KCND1,PTGIR,GGT5,RIN1,GLT25D1,MAP7D1,COL7A1	PROTEIN_HETEROTRIMERIZATION	2.41984	4.47021e-08
M1306	KIRC	7	34	M745	IL20RB	NA	2.44582	4.49796e-08
M239	KIRC	4	17	M41	TAL2,TRNP1	NA	2.41307	4.97722e-08
M1036	KIRC	5	51	M428	LUC7L,NPIPL3	NA	2.44622	5.07485e-08
M242	KIRC	4	11	M41	EHHADH	NA	0.415026	5.09901e-08
M1044	KIRC	5	17	M432	TELO2,KIAA0415,C7orf27	NA	2.40955	5.25163e-08
M1302	KIRC	7	42	M745	SAA1,SAA2	ACUTE_PHASE_RESPONSE	2.41726	5.37855e-08
M88	KIRC	3	55	M7	APOA5,APOA2,CYP2A6,AHSG	STEROID_METABOLIC_PROCESS	2.43608	5.42111e-08
M988	KIRC	5	25	M406	ACAT1,ETFDH	LIPID_OXIDATION	0.416554	5.50205e-08
M35	KIRC	3	26	M6	ACAA2	SMALL_MOLECULE_CATABOLIC_PROCESS	0.417168	6.24482e-08
M41	KIRC	3	79	M6	DDC,TAL2,KHK,UPB1	SMALL_MOLECULE_CATABOLIC_PROCESS	0.416103	6.26614e-08
M1318	KIRC	7	15	M750	PDLIM7	NA	2.39115	7.04079e-08
M150	KIRC	3	24	M9	INADL,PRKAA2	NA	0.414999	7.31328e-08
M1064	KIRC	5	40	M445	CNOT3,SRRT	REGULATION_OF_MRNA_PROCESSING	2.37667	7.3859e-08
M961	KIRC	5	33	M380	SLC4A3,HOXB9,SPTBN2	POTASSIUM_ION_IMPORT_ACROSS_PLASMA_MEMBRANE	2.37836	8.4961e-08
M380	KIRC	4	37	M83	SLC4A3,HOXB9,UCHL1	POTASSIUM_ION_IMPORT_ACROSS_PLASMA_MEMBRANE	2.38437	8.54946e-08
M406	KIRC	4	54	M94	ACAT1,SLC25A4,CDS1	MONOCARBOXYLIC_ACID_METABOLIC_PROCESS	0.424312	9.98127e-08
M248	KIRC	4	11	M44	TMEM174,NAT8B	NA	0.422324	1.07604e-07
M186	KIRC	5	26	M20	DGKA,TRAF5	NA	2.35934	1.08485e-07
M746	KIRC	6	63	M213	GFPT2,PTPRH,PAEP,MFI2,STEAP3	NA	2.33873	1.14822e-07
M257	KIRC	4	11	M46	RGL1	NA	0.423585	1.17117e-07
M26	KIRC	4	55	M4	ARPC1B,KCTD17,IMPDH1	NA	2.36724	1.18203e-07
M1443	KIRC	6	157	M1006	CCNL2,GSDMB,SNHG3	NA	2.35843	1.27139e-07
M1404	KIRC	6	12	M883	MEA1	NA	2.38393	1.62613e-07
M102	KIRC	3	344	M8	TOP2A,TPX2,KIF18B,CKAP2L,BUB1B,CCNB2,AURKB,CDC20,CEP55,ASF1B,C12orf48,PLK1,PKMYT1,KIF14,CDCA8,ASPM,RRM2	ORGANELLE_FISSION	2.32806	1.63764e-07
M472	KIRC	4	28	M101	LOC349114,ABCC5	NA	2.33461	1.71689e-07
M939	KIRC	5	11	M366	MRPL12	NA	2.36788	1.74884e-07
M708	KIRC	6	22	M185	KIAA1949	RESPONSE_TO_VITAMIN_E	2.31964	1.85342e-07
M605	KIRC	4	19	M129	LYSMD3	NA	0.434736	1.95617e-07
M20	KIRC	4	76	M4	KIAA1949,HAPLN3	DEFENSE_RESPONSE_TO_VIRUS	2.31065	2.00416e-07
M1278	KIRC	7	25	M726	MAGED4B,MAGED4	N_ACETYLGLUCOSAMINE_METABOLIC_PROCESS	2.29303	2.11472e-07
M482	KIRC	4	12	M101	MAST1	NA	2.30877	2.14857e-07
M360	KIRC	4	60	M78	TAF10	NA	2.33468	2.39032e-07
M574	KIRC	4	59	M120	CHM	PROTEASOMAL_PROTEIN_CATABOLIC_PROCESS	0.433813	2.54127e-07
M280	KIRC	4	10	M64	SGSM1,CRY2	NA	0.436692	2.82622e-07
M910	KIRC	5	25	M348	HDGFRP2	REGULATION_OF_RNA_METABOLIC_PROCESS	2.27684	2.86431e-07
M388	KIRC	4	72	M86	FBN3,LRRTM1,ATP6V1C2	STEROID_CATABOLIC_PROCESS	2.29076	2.90056e-07
M1116	KIRC	5	17	M497	TMEM184C,MSI2	NA	0.4364	3.01777e-07
M241	KIRC	4	30	M41	DDC	CELLULAR_AMINO_ACID_CATABOLIC_PROCESS	0.439424	3.07165e-07
M1326	KIRC	7	20	M754	TFF1,SCGB2A2	TISSUE_HOMEOSTASIS	2.27162	3.22175e-07
M19	KIRC	4	25	M4	PLAUR,IL1RN	POSITIVE_REGULATION_OF_CYTOKINE_PRODUCTION	2.28985	3.31599e-07
M309	KIRC	4	98	M73	C19orf53,SERF2	RIBONUCLEOPROTEIN_COMPLEX_BIOGENESIS	2.32096	3.38352e-07
M237	KIRC	4	79	M40	NAT8,SLC5A10,HAO2,TMEM27	SMALL_MOLECULE_CATABOLIC_PROCESS	0.441425	3.41991e-07
M848	KIRC	5	11	M309	SERF2	NA	2.30693	3.52034e-07
M375	KIRC	4	17	M81	MRPS25,LOC401052	NA	2.27282	3.63775e-07
M183	KIRC	5	12	M19	PLAUR,SLAMF9	NA	2.26383	3.75446e-07
M865	KIRC	5	11	M313	SNRPF	NA	2.30142	3.82623e-07
M1413	KIRC	6	17	M919	C7orf47	NA	2.2913	3.8796e-07
M579	KIRC	4	35	M122	PPM1A	NA	0.442628	3.90369e-07
M919	KIRC	5	39	M353	TMUB1,C7orf47	NA	2.2817	3.91376e-07
M1202	KIRC	5	20	M585	RBM18,RAB14,SPTLC1	NA	0.442914	3.98989e-07
M199	KIRC	5	40	M26	ARPC1B,KCTD17,PYCARD	NA	2.27755	4.12585e-07
M883	KIRC	5	17	M322	SNRPC	NA	2.30508	4.14559e-07
M1199	KIRC	5	29	M579	PPM1A	NA	0.445196	4.30031e-07
M1006	KIRC	5	198	M419	CCNL2,CHKB.CPT1B,AGAP6,GSDMB,AGAP4,WDR52,SNHG3	NA	2.25831	4.49264e-07
M432	KIRC	4	137	M101	E4F1,C19orf6,TELO2,TRMT2A,SELO,ZGPAT	POSITIVE_REGULATION_OF_TUMOR_NECROSIS_FACTOR_MEDIATED_SIGNALING_PATHWAY	2.25876	4.58864e-07
M8	KIRC	2	3456	M3	CCNL2,NKTR,LENG8,AHSA2,C17orf56,FAM193B,CENPT,DMTF1,ATG16L2,E4F1,ARGLU1,RHOT2,FNBP4,CHKB.CPT1B,TTLL3,AGER,MYADML,MLL4,AMAC1,LUC7L,CNOT3,ZNF587,TOP2A,LOC146880,MTMR9L,ANKRD13D,ZNF692,AGAP6,ZNF335,CRX,ARFGAP1,LOC100190986,AGAP4,TAF1C,CCDC84,FAM156A,KIAA0907,C19orf6,CCDC130,ZNF276,TELO2,DNHD1,AFG3L1,SFRS18,TPX2,CDK3,KIF18B,CKAP2L,MSH5,LRDD,TRMT2A,LOC349114,SLC9A5,CLK2,UBXN11,REXO1,ZBTB48,WASH7P,L3MB…	ORGANELLE_FISSION	2.25685	4.59366e-07
M1312	KIRC	7	27	M748	MEIS3,TPM2	MULTI_MULTICELLULAR_ORGANISM_PROCESS	2.24005	4.80814e-07
M94	KIRC	3	87	M7	ACAT1,SDHD,SLC25A4,CDS1	LIPID_OXIDATION	0.449449	4.88672e-07
M247	KIRC	4	10	M44	G6PC	NA	0.445351	5.24687e-07
M6	KIRC	2	1311	M3	USH1C,ACY3,NAT8,GLYAT,LRP2,DDC,GBA3,SLC28A1,AGXT2,CLRN3,UGT2A3,TMEM176A,PKLR,HNF1A,ACSM2B,NAT8B,MAOB,PKHD1,ACSM2A,ENPP3,SLC22A12,SLC7A9,FUT6,PDZD3,SLC5A10,LRRK2,DNAH7,HAO2,PDZK1IP1,EPS8L2,GLYATL1,CCL15,C1orf210,CRY2,TAL2,PIH1D2,SLC39A5,ACE2,RBP5,ACAA2,C11orf54,PRUNE2,PSD3,CRB3,CDK18,NPHP1,DECR2,EHHADH,FAAH,PDK2,TMEM27,TMEM174,ANKS4B,SLC22A11,CDHR5,PDZK1,ACBD4,METTL7B,KHK,GIPC2,MYO15B,CASC1,SHMT1,…	SMALL_MOLECULE_CATABOLIC_PROCESS	0.446682	5.25908e-07
M31	KIRC	4	1488	M5	ADAM12,ISLR,GFPT2,SLPI,SAA1,C1R,COL5A1,COL3A1,LUM,TAGLN,PDLIM7,COL1A1,EMILIN1,TGFBI,PDGFRA,LEPRE1,TPM2,MICAL2,TIMP1,HSPB6,IL20RB,SRPX2,PODN,DCN,NUMBL,COL1A2,SAA2,COL16A1,MAGED4B,ITGA5,FHL3,PLTP,STEAP3,COL5A2,COL6A2,TFF1,FAP,MEIS3,RUNX1,MAGEA6,DACT3,SPDEF,PPP1R1A,GALNT2,IGDCC4,SPEG,LTBP2,BMP1,C1S,ROR2,ITGA11,GGT5,ATP8B2,KCND1,PTPRH,PTGIR,FSCN1,CNTN1,CCDC80,FOXA1,NAV1,F2,RARRES1,MOCOS,LBP,LAMB3,FMO…	EXTRACELLULAR_STRUCTURE_ORGANIZATION	2.22391	5.33615e-07
M1305	KIRC	7	14	M745	PPP1R1A,PSAT1	NA	2.24364	5.36454e-07
M521	KIRC	4	32	M105	SLK	NA	0.445855	5.42562e-07
M981	KIRC	5	13	M401		CHROMATIN_ASSEMBLY	2.24257	6.12185e-07
M1027	KIRC	5	121	M426	C17orf56,ZNF276,LRDD	TELOMERIC_LOOP_DISASSEMBLY	2.22221	6.12941e-07
M1144	KIRC	5	12	M521	NUP160	NA	0.448885	6.15286e-07
M1187	KIRC	5	41	M574	CHM,ATP7A	PROTEASOMAL_PROTEIN_CATABOLIC_PROCESS	0.447578	6.20997e-07
M1499	KIRC	6	37	M1187	CHM,ATP7A	PROTEASOMAL_PROTEIN_CATABOLIC_PROCESS	0.446656	6.43189e-07
M101	KIRC	3	3112	M8	CCNL2,NKTR,LENG8,AHSA2,C17orf56,FAM193B,CENPT,DMTF1,ATG16L2,E4F1,ARGLU1,RHOT2,FNBP4,CHKB.CPT1B,TTLL3,AGER,MYADML,MLL4,AMAC1,LUC7L,CNOT3,ZNF587,LOC146880,MTMR9L,ANKRD13D,ZNF692,AGAP6,ZNF335,CRX,ARFGAP1,LOC100190986,AGAP4,TAF1C,CCDC84,FAM156A,KIAA0907,C19orf6,CCDC130,ZNF276,TELO2,DNHD1,AFG3L1,SFRS18,CDK3,MSH5,LRDD,TRMT2A,LOC349114,SLC9A5,CLK2,UBXN11,REXO1,ZBTB48,WASH7P,L3MBTL,SFRS16,SPEF1,TUBGCP6,L…	REGULATION_OF_RNA_METABOLIC_PROCESS	2.22391	6.78456e-07
M392	KIRC	4	24	M88	AHSG,FGL1	PLATELET_DEGRANULATION	2.21647	6.93901e-07
M213	KIRC	5	261	M31	SLPI,SAA1,GFPT2,IL20RB,SAA2,STEAP3,PPP1R1A,PTPRH,F2,MOCOS,LBP,LAMB3,RARRES1,MFI2,PAEP,HP,MAT1A	ACUTE_PHASE_RESPONSE	2.21299	7.16625e-07
M929	KIRC	5	79	M358	PSMB3,BANF1,PSMB6	REGULATION_OF_CELLULAR_AMINO_ACID_METABOLIC_PROCESS	2.23569	7.46397e-07
M548	KIRC	4	17	M111	SECISBP2L	NA	0.448726	7.47348e-07
M419	KIRC	4	218	M101	CCNL2,CLK2,CHKB.CPT1B,AGAP6,GSDMB,AGAP4,WDR52,SNHG3	NA	2.22045	7.51685e-07
M592	KIRC	4	39	M125	RNF38	NA	0.448979	7.55429e-07
M745	KIRC	6	120	M213	SAA1,IL20RB,SAA2,PPP1R1A,F2,LBP,HP,MAT1A	ACUTE_PHASE_RESPONSE	2.22187	7.58712e-07
M1058	KIRC	5	17	M442	REXO1	NA	2.20805	7.68104e-07
M989	KIRC	5	15	M406	SLC25A4,OGDHL	MITOCHONDRIAL_GENOME_MAINTENANCE	0.450849	7.7232e-07
M52	KIRC	3	17	M6	LRRK2	NEURON_PROJECTION_ARBORIZATION	0.451671	8.35491e-07
M393	KIRC	4	31	M88	APOA5,CYP2A6,SLC10A1	MONOCARBOXYLIC_ACID_METABOLIC_PROCESS	2.2148	8.604e-07
M358	KIRC	4	102	M78	PSMB3,BANF1,PSMB6	SCF_DEPENDENT_PROTEASOMAL_UBIQUITIN_DEPENDENT_PROTEIN_CATABOLIC_PROCESS	2.21792	9.63081e-07
M1455	KIRC	6	36	M1039	FNBP4,SFRS2	RNA_SPLICING	2.18201	1.19646e-06
M442	KIRC	4	41	M101	REXO1,FBRS	REGULATION_OF_CHROMOSOME_ORGANIZATION	2.16716	1.26691e-06
M1544	KIRC	7	12	M1413	C7orf47	NA	2.19831	1.29068e-06
M1219	KIRC	5	11	M637	PEX1,NAPEPLD	NA	0.461961	1.31449e-06
M64	KIRC	3	23	M6	CRY2	RHYTHMIC_PROCESS	0.459712	1.31501e-06
M426	KIRC	4	175	M101	C17orf56,ZNF276,TAF1C,CHTF18,SFRS16,SUV420H2,ZNF335,LRDD,RAD9A	NA	2.1622	1.35257e-06
M1015	KIRC	5	14	M422	LOC146880	NA	2.1717	1.35406e-06
M1004	KIRC	5	97	M418	FAM193B,ZNF692,FAM156A,NCRNA00174,GIGYF1	NA	2.17282	1.38235e-06
M747	KIRC	6	77	M213	SLPI	NEGATIVE_REGULATION_OF_PEPTIDASE_ACTIVITY	2.16808	1.39017e-06
M1285	KIRC	7	40	M730	ADAM12	OSSIFICATION	2.15196	1.41921e-06
M350	KIRC	4	12	M75		NA	2.17521	1.42703e-06
M1507	KIRC	6	11	M1224	MEMO1,UBE2A	NA	2.17116	1.50448e-06
M1441	KIRC	6	90	M1004	FAM193B,FAM156A	NA	2.16311	1.58998e-06
M1042	KIRC	5	15	M432	TRMT2A	RNA_MODIFICATION	2.15765	1.64749e-06
M759	KIRC	6	16	M216	PDGFD,TLL1	NA	0.464464	1.65342e-06
M1091	KIRC	5	13	M474	PCNXL3,TMEM104	NA	2.1302	1.69308e-06
M129	KIRC	3	56	M9	PJA2,LYSMD3	NA	0.466215	1.76617e-06
M1017	KIRC	5	144	M423	AHSA2,KIAA0907,CSAD,LOC100270804,LOC91316	NA	2.14553	1.81092e-06
M456	KIRC	4	31	M101	SLC9A5,LOC728264,POM121L9P	NA	2.14985	1.84648e-06
M122	KIRC	3	89	M9	PPM1A,ARHGAP5,SYNJ2BP	NA	0.466752	1.90184e-06
M322	KIRC	4	36	M73	RDBP,MEA1	MATURATION_OF_SSU_RRNA_FROM_TRICISTRONIC_RRNA_TRANSCRIPT_SSU_RRNA_5_8S_RRNA_LSU_RRNA_	2.18495	1.91115e-06
M44	KIRC	3	68	M6	SLC22A12,NAT8B,TMEM174	ORGANIC_ANION_TRANSPORT	0.466689	1.91581e-06
M245	KIRC	4	23	M44	SLC22A12	ORGANIC_ANION_TRANSPORT	0.469459	2.11597e-06
M423	KIRC	4	193	M101	AHSA2,MSH5,TRPV1,VAMP1,KIAA0907,LOC91316,CSAD,LOC100270804,PRDXDD1P	NA	2.12908	2.14608e-06
M471	KIRC	4	13	M101	GATAD1,ZNF138	NA	2.14826	2.2625e-06
M787	KIRC	6	111	M221	ELK3,HIP1,SWAP70,ZNF366,UTRN,TGFBR2	HOMOPHILIC_CELL_ADHESION_VIA_PLASMA_MEMBRANE_ADHESION_MOLECULES	0.467441	2.35805e-06
M1517	KIRC	8	20	M1312	MEIS3	NA	2.11736	2.40692e-06
M801	KIRC	5	56	M237	NAT8,TMEM27	SMALL_MOLECULE_CATABOLIC_PROCESS	0.472521	2.44699e-06
M120	KIRC	3	81	M9	CHM,STAM2,SPOPL	PROTEASOMAL_PROTEIN_CATABOLIC_PROCESS	0.470266	2.66728e-06
M1266	KIRC	7	12	M722	LRRC15	NA	2.12352	2.68056e-06
M585	KIRC	4	38	M123	RAB14,RBM18,UBQLN1	NA	0.473071	2.74785e-06
M725	KIRC	6	81	M212	LUM,PDGFRA,DCN,CCDC80,FMOD	EXTRACELLULAR_STRUCTURE_ORGANIZATION	2.09589	2.80328e-06
M1041	KIRC	5	70	M432	E4F1,ZGPAT	POSITIVE_REGULATION_OF_TUMOR_NECROSIS_FACTOR_MEDIATED_SIGNALING_PATHWAY	2.11546	2.86599e-06
M915	KIRC	5	14	M349	PRR24,TOM1L1	NA	0.472959	2.9614e-06
M1158	KIRC	5	14	M543	GNA11,RGP1	NA	0.466302	2.98919e-06
M1195	KIRC	5	13	M576		NA	2.11892	2.98957e-06
M1057	KIRC	5	16	M442	FBRS,SETD1A	NA	2.09885	3.28875e-06
M368	KIRC	4	23	M79	DYNC2H1	INTRACILIARY_RETROGRADE_TRANSPORT	0.475575	3.95572e-06
M792	KIRC	6	45	M223	TSPAN7,NDRG2,NR3C2	NA	0.477378	4.06855e-06
M362	KIRC	4	32	M78	ALG3	NA	2.09947	4.15515e-06
M34	KIRC	3	74	M6	GLYAT,ACSM2B,ACSM2A,SHMT1	URATE_METABOLIC_PROCESS	0.482908	4.21e-06
M78	KIRC	3	266	M7	PSMB3,TAF10,ALG3,GPX1,BANF1,OAZ1,PSMB6,BCL2L12,ZDHHC24,UBE2S	REGULATION_OF_CELLULAR_AMINE_METABOLIC_PROCESS	2.09139	4.2592e-06
M240	KIRC	4	21	M41	C22orf45,UPB1	FATTY_ACID_CATABOLIC_PROCESS	0.480911	4.288e-06
M40	KIRC	3	112	M6	NAT8,SLC5A10,FUT6,PDZK1	SMALL_MOLECULE_CATABOLIC_PROCESS	0.482054	4.3665e-06
M83	KIRC	3	58	M7	SLC4A3,SPTBN2,HOXB9	POTASSIUM_ION_IMPORT_ACROSS_PLASMA_MEMBRANE	2.08231	4.54267e-06
M1360	KIRC	7	21	M776	DOCK9	DEVELOPMENT_OF_PRIMARY_FEMALE_SEXUAL_CHARACTERISTICS	0.480835	4.72284e-06
M418	KIRC	4	133	M101	FAM193B,NCRNA00174,FLJ45340,FAM156A,ZNF692,LOC150776,RBM33	ACTIVATION_OF_GTPASE_ACTIVITY	2.08232	4.78663e-06
M197	KIRC	5	19	M25	LIMK1,XPO6	NA	2.07522	4.96387e-06
M1011	KIRC	5	52	M421	TTLL3,CACNB1	RRNA_BASE_METHYLATION	2.07027	5.09616e-06
M488	KIRC	4	36	M102	ASF1B,PKMYT1	DNA_DEPENDENT_DNA_REPLICATION	2.07041	5.32511e-06
M353	KIRC	4	63	M76	C7orf47,MXD3,TMUB1	NA	2.07977	5.49979e-06
M576	KIRC	4	34	M121	TRIP11,YLPM1	DNA_REPLICATION_INDEPENDENT_NUCLEOSOME_ORGANIZATION	0.4812	5.62119e-06
M12	KIRC	4	178	M4	SPI1,WAS,TYROBP,DEF6,IKBKE,FCER1G,AIF1,GMIP,TNFAIP8L2,CEBPA	POSITIVE_REGULATION_OF_CELL_ACTIVATION	2.0647	5.75e-06
M1493	KIRC	6	22	M1162	MYO9A	NA	0.481691	5.84246e-06
M164	KIRC	5	95	M12	SPI1,WAS,DEF6	CYTOKINE_METABOLIC_PROCESS	2.05546	6.12331e-06
M169	KIRC	5	19	M13	PARP15	RESPONSE_TO_MAGNESIUM_ION	2.05207	6.37823e-06
M123	KIRC	3	57	M9	RBM18,RAB14,UBQLN1	PROSTANOID_METABOLIC_PROCESS	0.488275	6.38605e-06
M75	KIRC	3	308	M7	HSPBP1,CCDC124,RBM42,CCDC12,SIRT6,HDGFRP2,FKBP8,ZNF579,PRR24,SCAF1,SF3A2,CCDC94,XAB2,TSSC4,ZNF444,ZNF787,PTOV1	EXTRINSIC_APOPTOTIC_SIGNALING_PATHWAY	2.05861	6.39728e-06
M1224	KIRC	5	16	M638	MEMO1,UBE2A	NA	2.04776	6.84604e-06
M1542	KIRC	8	45	M1372	ELK3,TGFBR2	CELL_MATRIX_ADHESION	0.484672	6.94682e-06
M742	KIRC	6	10	M212	IKBIP	NA	2.03027	8.05204e-06
M121	KIRC	3	61	M9	FAM179B,TRIP11	RNA_SPLICING	0.490464	8.34086e-06
M51	KIRC	3	13	M6	DLST,KIAA1737	NA	0.490365	8.38788e-06
M1372	KIRC	7	59	M787	ELK3,TGFBR2,ITGA9,ZNF366	CELL_MATRIX_ADHESION	0.488278	8.60798e-06
M125	KIRC	3	62	M9	RNF38	REGULATION_OF_EPIDERMAL_CELL_DIFFERENTIATION	0.489729	8.61846e-06
M427	KIRC	4	101	M101	CENPT,CCDC84,WASH7P,ZNF26	NA	2.02955	8.70841e-06
M221	KIRC	5	122	M32	ELK3,HIP1,SWAP70,ZNF366,UTRN,TGFBR2	HOMOPHILIC_CELL_ADHESION_VIA_PLASMA_MEMBRANE_ADHESION_MOLECULES	0.491504	8.82408e-06
M738	KIRC	6	34	M212	ITGA5,LOXL2	NEGATIVE_REGULATION_OF_CELLULAR_RESPONSE_TO_TRANSFORMING_GROWTH_FACTOR_BETA_STIMULUS	2.01088	9.32558e-06
M1150	KIRC	5	11	M528	ZNF24,RPRD1A	NA	0.492636	9.36842e-06
M997	KIRC	5	10	M407	ACO2	NA	0.498175	9.6465e-06
M421	KIRC	4	61	M101	TTLL3,CACNB1	NA	2.02401	9.77752e-06
M474	KIRC	4	31	M101	PCNXL3,ATG2A,ARHGEF18	NA	1.9943	1.02697e-05
M1448	KIRC	6	43	M1011	TTLL3,CACNB1	NA	2.01871	1.04406e-05
M1049	KIRC	5	12	M434	ZRANB2	NA	2.01937	1.07766e-05
M707	KIRC	6	12	M185	SIPA1	NA	1.99922	1.08817e-05
M740	KIRC	6	11	M212	FKBP10	NA	2.00559	1.17151e-05
M48	KIRC	3	18	M6	NEK6,AK3L1	NA	0.495861	1.24394e-05
M386	KIRC	4	49	M85	PRSS22,GRHL2	EPIDERMIS_DEVELOPMENT	2.00366	1.29617e-05
M686	KIRC	6	47	M164	SPI1	GRANULOCYTE_DIFFERENTIATION	2.00069	1.33148e-05
M377	KIRC	4	26	M82	KLK6,C2orf71	POSITIVE_REGULATION_OF_DEFENSE_RESPONSE_TO_BACTERIUM	1.99364	1.35002e-05
M739	KIRC	6	40	M212	TGFBI,SPINK13	DIGESTION	1.98597	1.37579e-05
M528	KIRC	4	17	M105	ZNF24	REGULATION_OF_CENTRIOLE_REPLICATION	0.500658	1.39029e-05
M687	KIRC	6	71	M166	ACAP1,SEPT1,TBC1D10C,PSTPIP1,ARHGAP9	REGULATION_OF_LYMPHOCYTE_ACTIVATION	1.98446	1.59034e-05
M420	KIRC	4	173	M101	LENG8,TUBGCP6,DNHD1,LY6G5B,STAG3L3,LOC100272228,SYNGAP1,WDR27	NA	1.9834	1.60428e-05
M547	KIRC	4	31	M111	IREB2,UBR1,USP8	NA	0.504223	1.72315e-05
M818	KIRC	5	10	M288	FUT11,BICC1	NA	0.500449	1.73565e-05
M311	KIRC	4	70	M73	MRPL38,ASPSCR1	MITOCHONDRIAL_TRANSLATION	1.98351	1.82806e-05
M168	KIRC	5	17	M13	SP140	NEGATIVE_REGULATION_OF_DNA_BINDING_TRANSCRIPTION_FACTOR_ACTIVITY	1.96771	1.88976e-05
M294	KIRC	4	15	M71	AQP2,UMOD	SODIUM_ION_HOMEOSTASIS	1.97501	1.96143e-05
M433	KIRC	4	27	M101	SNORA57,RPPH1	NEGATIVE_REGULATION_OF_MEGAKARYOCYTE_DIFFERENTIATION	1.97189	2.07347e-05
M604	KIRC	4	10	M129	SMAD5	NA	0.510867	2.07766e-05
M348	KIRC	4	61	M75	HDGFRP2,SCAF1	RNA_SPLICING	1.9539	2.08765e-05
M97	KIRC	3	38	M7	P4HB	NA	1.95595	2.10258e-05
M1039	KIRC	5	46	M431	FNBP4,SFRS2	REGULATION_OF_MRNA_SPLICING_VIA_SPLICEOSOME	1.96127	2.11877e-05
M1194	KIRC	5	11	M576	TRIP11	NA	0.507028	2.13983e-05
M13	KIRC	4	175	M4	ACAP1,ARHGAP9,ARRDC5,ZAP70,PTPN7,PARP15,SEPT1,TBC1D10C,TMC8,PSTPIP1,LIMD2	T_CELL_ACTIVATION	1.95921	2.16518e-05
M847	KIRC	5	65	M309	C19orf53	RIBONUCLEOPROTEIN_COMPLEX_BIOGENESIS	1.9876	2.19679e-05
M320	KIRC	4	14	M73	GMPPA	NA	1.95858	2.28824e-05
M1373	KIRC	7	21	M787	SWAP70	NEGATIVE_REGULATION_OF_CELL_ADHESION_MEDIATED_BY_INTEGRIN	0.511072	2.31968e-05
M228	KIRC	4	63	M34	GLYAT,ACSM2B,ACSM2A,SHMT1	URATE_METABOLIC_PROCESS	0.513287	2.34598e-05
M1299	KIRC	7	22	M739	TGFBI,SPINK13	NEGATIVE_REGULATION_OF_DIGESTIVE_SYSTEM_PROCESS	1.94618	2.35851e-05
M726	KIRC	6	36	M212	MAGED4B,MAGED4,FGD1	EMBRYONIC_ORGAN_MORPHOGENESIS	1.93845	2.43225e-05
M25	KIRC	4	34	M4	LIMK1	POSITIVE_REGULATION_OF_DNA_BIOSYNTHETIC_PROCESS	1.95226	2.46438e-05
M92	KIRC	3	46	M7	HIST1H4H	CHROMATIN_ASSEMBLY	1.95276	2.63765e-05
M1349	KIRC	7	33	M768	TMEM88,RAMP3	NA	0.518032	2.89118e-05
M540	KIRC	4	26	M106	SERINC1	NA	0.514162	2.93635e-05
M1052	KIRC	5	10	M439	SNHG10	NA	1.94023	3.03025e-05
M1265	KIRC	7	12	M722	EMILIN1,CLEC11A	NA	1.92185	3.08669e-05
M1009	KIRC	5	164	M420	LENG8,TUBGCP6,DNHD1,LY6G5B,STAG3L3,LOC100272228,WDR27	NA	1.93099	3.20818e-05
M824	KIRC	5	61	M293	PLA2G4F	NA	1.94461	3.21277e-05
M637	KIRC	4	16	M139	PEX1,RAG1	NA	0.519306	3.43114e-05
M1297	KIRC	7	12	M739	RUNX1	PROGESTERONE_METABOLIC_PROCESS	1.91546	3.45105e-05
M293	KIRC	4	95	M71	PLA2G4F,INPP5J,FGF9	NA	1.92826	3.57878e-05
M1136	KIRC	5	33	M511	DPP8	CELLULAR_RESPONSE_TO_LEUCINE_STARVATION	0.517775	3.59965e-05
M233	KIRC	4	45	M37	SLC28A1,CDK18,DGCR5	NA	0.521884	3.89182e-05
M365	KIRC	4	67	M79	COX6B1,ATP5E,ATP5I,UQCR10	ATP_SYNTHESIS_COUPLED_ELECTRON_TRANSPORT	1.9296	3.90883e-05
M1157	KIRC	5	40	M543	RC3H2	MICROTUBULE_ANCHORING_AT_CENTROSOME	0.515507	3.93123e-05
M229	KIRC	4	11	M34	TRIM10	INTERACTION_WITH_HOST	0.52232	3.99862e-05
M405	KIRC	4	33	M94	SDHD,FBXO8,TSG101	PROTEASOMAL_PROTEIN_CATABOLIC_PROCESS	0.527304	4.01089e-05
M1145	KIRC	5	20	M521	SLK	NA	0.521497	4.30472e-05
M1264	KIRC	7	55	M722	COL5A1,COL1A1	EXTRACELLULAR_STRUCTURE_ORGANIZATION	1.89701	4.42638e-05
M932	KIRC	5	23	M362	ALG3	NA	1.91762	4.66734e-05
M1045	KIRC	5	17	M433	RPPH1,RMRP	NEGATIVE_REGULATION_OF_MEGAKARYOCYTE_DIFFERENTIATION	1.9079	4.74409e-05
M902	KIRC	5	12	M345	SHARPIN	NA	1.91467	4.82798e-05
M935	KIRC	5	13	M365	ATP5E	NA	0.524731	5.44345e-05
M79	KIRC	3	250	M7	NDUFS8,COX6B1,SLC25A39,ATP5E,TIMM50,MRPL12,MRPL41,DYNC2H1,CXorf57	ATP_SYNTHESIS_COUPLED_ELECTRON_TRANSPORT	1.90115	5.4646e-05
M722	KIRC	6	96	M212	COL5A1,COL1A1,NAV1,EMILIN1,PCOLCE,TRAM2	EXTRACELLULAR_STRUCTURE_ORGANIZATION	1.88034	5.53475e-05
M1102	KIRC	5	39	M485	TOP2A,NCAPG	CHROMOSOME_SEGREGATION	1.88158	6.09157e-05
M1276	KIRC	7	68	M725	LUM,PDGFRA,DCN	EXTRACELLULAR_STRUCTURE_ORGANIZATION	1.86975	6.23183e-05
M431	KIRC	4	72	M101	FNBP4,PRPF39,RBM39	RNA_SPLICING	1.87988	6.28133e-05
M1003	KIRC	5	20	M418	FLJ45340,RBM33	NA	1.88277	6.34729e-05
M374	KIRC	4	23	M81	SEC13	ANTIGEN_PROCESSING_AND_PRESENTATION_OF_PEPTIDE_ANTIGEN_VIA_MHC_CLASS_I	1.88432	6.56386e-05
M855	KIRC	5	34	M311	MRPL38	MITOCHONDRIAL_TRANSLATIONAL_TERMINATION	1.8881	6.94823e-05
M212	KIRC	5	853	M31	ADAM12,ISLR,C1R,COL5A1,COL3A1,LUM,COL1A1,TGFBI,PDGFRA,EMILIN1,MICAL2,HSPB6,SRPX2,DCN,COL1A2,PODN,COL16A1,MAGED4B,ITGA5,COL5A2,FAP,RUNX1,LTBP2,C1S,ROR2,ITGA11,ATP8B2,IGDCC4,FSCN1,CNTN1,PLTP,CCDC80,NAV1,FMOD,RPN2,PRELP,ITGB1,CPXM1,PDIA4,CFB,C7,PCOLCE,FLNA,FAM126A,LOXL2,TRAM2,MAGED4,MSRB3,MARCKSL1,APCDD1L,SPINK13,MPZL1,SULF2	EXTRACELLULAR_STRUCTURE_ORGANIZATION	1.85611	7.61766e-05
M776	KIRC	6	34	M219	DOCK9,KIAA0355	NA	0.534349	7.78176e-05
M752	KIRC	6	12	M215	KRT6A,KRT6B	CORNIFICATION	1.86561	7.78782e-05
M412	KIRC	4	24	M97	P4HB	NA	1.85672	7.87827e-05
M916	KIRC	5	31	M351	CCDC12	NA	1.86007	8.21247e-05
M1528	KIRC	8	20	M1332	CYYR1,CLEC14A	NA	0.538736	8.37954e-05
M7	KIRC	2	4631	M3	GADD45GIP1,C19orf53,PSMB3,NDUFS8,ROMO1,ATP6V1G3,NDUFB7,TRAPPC5,TAF10,FBN3,RPL18,COX5A,PLA2G4F,BSND,HSPBP1,COX6A1,UQCRFS1,DLD,UQCRC1,UQCR11,COX7B,SH3BGRL3,COX6B1,NUBP2,BANF1,MOG,FOXI1,RPS16,AURKAIP1,ANAPC11,NDUFS3,RPS11,MRPL55,TEX264,SLC25A39,ALG3,C19orf70,SIRT6,GPX1,PRDX5,CCDC12,SDHD,NDUFA13,CCDC124,INO80E,GRHL2,SSNA1,EXOSC7,TFAP2B,COX4I1,RBM42,FKBP8,RPS3,SETMAR,TCEB2,NDUFS7,PSMB4,C7orf47,TMEM213…	PROTEIN_TARGETING	1.86974	8.45311e-05
M318	KIRC	4	41	M73	PSMB4	MITOCHONDRIAL_TRANSLATIONAL_TERMINATION	1.86451	8.5812e-05
M434	KIRC	4	95	M101	DMTF1,CCDC76,SFRS11,TIA1	NA	1.85555	8.72845e-05
M577	KIRC	4	21	M121	FAM179B	NA	0.539343	8.96958e-05
M196	KIRC	5	17	M24	ATAD5	CILIARY_BASAL_BODY_PLASMA_MEMBRANE_DOCKING	1.84497	9.2296e-05
M155	KIRC	3	16	M9	CAD,PDCD11	RIBOSOME_BIOGENESIS	1.83371	9.64517e-05
M1552	KIRC	7	193	M1480	STRN,REST,GTF2A1,NHLRC2,RAPGEF6,HIPK3,PAFAH1B2	REGULATION_OF_RNA_METABOLIC_PROCESS	0.536316	9.67726e-05
M283	KIRC	4	52	M69	COX6A1,UBL5	ATP_SYNTHESIS_COUPLED_ELECTRON_TRANSPORT	1.85889	9.87212e-05
M1129	KIRC	5	217	M510	STRN,NHLRC2,REST,RAPGEF6,GTF2A1,HIPK3,PAFAH1B2,MAPK8,SBNO1,C9orf41	REGULATION_OF_RNA_METABOLIC_PROCESS	0.536857	9.93298e-05
M575	KIRC	4	22	M120	STAM2	NA	0.543395	9.9781e-05
M1203	KIRC	5	10	M603	CNIH	NA	0.543789	0.000102771
M436	KIRC	4	63	M101	RHOT2,SH2B1	NA	1.8442	0.000103052
M890	KIRC	5	53	M339	RPL18,RPL19	COTRANSLATIONAL_PROTEIN_TARGETING_TO_MEMBRANE	1.85056	0.000106045
M771	KIRC	6	23	M217		POSITIVE_REGULATION_OF_MACROPHAGE_DERIVED_FOAM_CELL_DIFFERENTIATION	0.543083	0.000106428
M259	KIRC	4	25	M47	HNF1A	NA	0.545921	0.000107781
M1414	KIRC	6	15	M919	TMUB1	NA	1.84763	0.000108252
M296	KIRC	4	11	M71	NRG4,TAF7L	NA	1.83934	0.00010912
M128	KIRC	3	42	M9	EIF2S1,CNIH	NA	0.545922	0.00011298
M58	KIRC	3	24	M6	CRB3,RAB17	EMBRYONIC_SKELETAL_JOINT_MORPHOGENESIS	0.547707	0.00011718
M73	KIRC	3	1002	M7	GADD45GIP1,C19orf53,ROMO1,TRAPPC5,ANAPC11,MRPL55,AURKAIP1,SSNA1,PSMB4,MRPL38,C17orf90,TCEB2,ASPSCR1,C19orf24,ADRM1,ZNF668,LSM7,DRAP1,C9orf142,RDBP,SERF2,SNRPD2,COQ4,BAD,BUD31,TRMT112,OST4,NHP2,NDUFA2,POLR2J,BLOC1S1,PHKG2,MRPL28,NME1,RPP21,MEA1,SNRPG,ZNHIT1,POLR2I,EDF1,MRPS34,POLR2L,ROBLD3,UQCRQ,LSMD1,FAM108A1,MRPL23,CLTB,HRAS,RFXANK,THAP3,LSM5,UBE2J2,TXNDC17	TRANSLATIONAL_TERMINATION	1.84169	0.000125278
M1021	KIRC	5	156	M425	NKTR,ARGLU1,SFRS18	NA	1.83061	0.000127973
M1451	KIRC	6	149	M1021	NKTR,ARGLU1	NA	1.83061	0.000127973
M390	KIRC	4	36	M87	ZBTB47,DBN1	NA	1.81893	0.000128252
M111	KIRC	3	82	M9	IREB2,SECISBP2L,UBR1,ARFGEF2	RAS_PROTEIN_SIGNAL_TRANSDUCTION	0.547729	0.000129043
M450	KIRC	4	20	M101	C9orf37	NA	1.82577	0.000129849
M295	KIRC	4	17	M71	STAP1,SYNGR3	NA	1.83037	0.000132163
M862	KIRC	5	53	M312	ROMO1	NA	1.83768	0.000139848
M422	KIRC	4	116	M101	ATG16L2,AGER,LOC146880,BAT1,KIAA0895L,ARHGAP33,TJAP1	NA	1.81829	0.000140927
M703	KIRC	6	21	M178	LOC96610	NA	1.82139	0.000143438
M543	KIRC	4	54	M108	RC3H2,RGP1	NA	0.545765	0.000151836
M82	KIRC	3	66	M7	TFAP2B,KLK6,TMPRSS4,KLK7	EPITHELIAL_CELL_DIFFERENTIATION_INVOLVED_IN_KIDNEY_DEVELOPMENT	1.82004	0.000153077
M202	KIRC	5	32	M27	PSMA5,C20orf24	CELLULAR_AMINO_ACID_METABOLIC_PROCESS	1.81669	0.000159069
M60	KIRC	3	18	M6	PDK2,ACBD4	NA	0.554395	0.000167015
M900	KIRC	5	21	M345	RBM42	NA	1.81104	0.000171609
M768	KIRC	6	46	M217	TMEM88,SLC9A3R2,RAMP3	POSITIVE_REGULATION_OF_PRI_MIRNA_TRANSCRIPTION_BY_RNA_POLYMERASE_II	0.556167	0.000172973
M107	KIRC	3	10	M9	COX15	NA	0.556234	0.000173645
M366	KIRC	4	123	M79	NDUFS8,SLC25A39,TIMM50,MRPL41,MRPL12	NA	1.81326	0.000175177
M974	KIRC	5	13	M392	AHSG,APOA2	NEGATIVE_REGULATION_OF_HYDROLASE_ACTIVITY	1.8018	0.000179229
M1148	KIRC	5	10	M527	ZNF568	NA	0.552993	0.000180254
M810	KIRC	5	20	M281	NDUFS3	ATP_SYNTHESIS_COUPLED_ELECTRON_TRANSPORT	1.81428	0.000182357
M1480	KIRC	6	211	M1129	STRN,NHLRC2,REST,RAPGEF6,GTF2A1,HIPK3,PAFAH1B2,MAPK8,SBNO1,C9orf41	REGULATION_OF_RNA_METABOLIC_PROCESS	0.551232	0.000183193
M580	KIRC	4	17	M122	BRMS1L	NA	0.556633	0.000185671
M27	KIRC	4	49	M4	PSMA5,C20orf24,PSMD14	CELLULAR_AMINO_ACID_METABOLIC_PROCESS	1.80232	0.000194315
M837	KIRC	5	51	M305	NUBP2	REGULATION_OF_AUTOPHAGY	1.79452	0.000205716
M886	KIRC	5	12	M325	SNRPG	NA	1.80495	0.000207734
M359	KIRC	4	29	M78	OAZ1,GPX1	NA	1.79233	0.000211846
M581	KIRC	4	11	M122	TOX4,PRMT5	NA	0.560146	0.000216503
M802	KIRC	5	13	M237	SLC5A10	NA	0.559437	0.000219649
M934	KIRC	5	40	M365	COX6B1,ATP5I	ATP_SYNTHESIS_COUPLED_ELECTRON_TRANSPORT	1.79336	0.00021997
M1257	KIRC	7	17	M701	PLCB2,PARVG	NA	1.78052	0.0002309
M47	KIRC	3	56	M6	PKLR,HNF1A,ALDH4A1	CELLULAR_AMINO_ACID_CATABOLIC_PROCESS	0.562831	0.000233886
M71	KIRC	3	399	M7	ATP6V1G3,PLA2G4F,BSND,FOXI1,TMEM213,TBC1D1,KRTAP5.8,PLCG2,ZDHHC3,INPP5J,ATP6V0A4,RHBG,HEPACAM2,GPR110,SETMAR,STAP1,KLHL3,CLNK,FGF9,ITGB1BP3,SFTPB,C6orf168,SLC9A4,KIT,ANO5,TBC1D14	MONOVALENT_INORGANIC_CATION_HOMEOSTASIS	1.78011	0.000238565
M81	KIRC	3	140	M7	UQCRC1,TEX264,EXOSC7,COX8A,MRPS25,SEC13,TMEM111,ATP6V0C	NA	1.77611	0.000254369
M163	KIRC	5	50	M12	TYROBP,FCER1G,CEBPA	VERY_LOW_DENSITY_LIPOPROTEIN_PARTICLE_CLEARANCE	1.77588	0.000266563
M9	KIRC	2	3913	M3	STRN,ASXL2,TAOK1,LATS1,UHMK1,CA9,DPP8,REST,SHPRH,SLC30A6,PAFAH1B2,UEVLD,CHM,NHLRC2,TTBK2,BPTF,TOP2B,SACM1L,MLL2,GTF2A1,ZDHHC20,CCNT1,RC3H2,STT3B,PJA2,C9orf102,GOLT1B,C1orf58,RAPGEF6,CSNK2A1P,UBR1,SBNO1,APOOL,RIF1,DNAJB14,LMTK2,ANGPTL4,SCYL2,MYSM1,PXK,BIRC6,SLC25A40,RNF38,NBEAL1,IREB2,ARHGAP5,EIF2S1,ASH1L,MYO9A,PPM1A,SPOPL,VTA1,ATF2,FAM179B,CREB1,CEP170,HIPK3,ZNF192,C12orf51,ALDH6A1,PDCD6IP,YLPM1,…	COVALENT_CHROMATIN_MODIFICATION	0.560923	0.000266969
M477	KIRC	4	18	M101	FOSL1,PLK3	NA	1.76908	0.000272258
M911	KIRC	5	16	M348	SCAF1,MAP1S	REGULATION_OF_CALCIUM_MEDIATED_SIGNALING	1.76686	0.000274191
M105	KIRC	3	703	M9	STRN,DPP8,REST,NHLRC2,GTF2A1,ZDHHC20,SBNO1,PAFAH1B2,RIF1,MAPK8,SLK,MGAT5,ATF2,RAPGEF6,MED1,ETV3,ACTR2,HIPK3,RBBP5,LOC284441,MED13,DDX21,HEATR5A,HUWE1,MAP3K2,C10orf119,ZNF24,ADAM10,TGFBRAP1,MTF1	NUCLEAR_TRANSPORT	0.561837	0.000278304
M243	KIRC	4	26	M42	SLC7A9,AGXT2	XENOBIOTIC_GLUCURONIDATION	0.5693	0.000281981
M37	KIRC	3	53	M6	SLC28A1,CDK18	NA	0.564631	0.000286015
M231	KIRC	4	29	M36	ENPP3,LOC100131551	REGULATION_OF_STEROID_BIOSYNTHETIC_PROCESS	0.5651	0.00029185
M211	KIRC	5	13	M30	CAPZA1,ARPC5	ACTIN_FILAMENT_ORGANIZATION	1.7658	0.000295009
M139	KIRC	3	61	M9	SNX13,PEX1	NA	0.570587	0.000303082
M179	KIRC	5	29	M18	CD19	B_CELL_ACTIVATION	1.76112	0.000310218
M938	KIRC	5	79	M366	NDUFS8,SLC25A39,MRPL41	NADH_DEHYDROGENASE_COMPLEX_ASSEMBLY	1.76703	0.000316076
M210	KIRC	5	10	M30	PABPC1	NA	1.75698	0.000323329
M839	KIRC	5	17	M305	UQCR11	NA	0.565957	0.000331277
M166	KIRC	5	112	M13	ACAP1,ARHGAP9,SEPT1,TBC1D10C,ZAP70,PSTPIP1,TMC8,LIMD2	NA	1.75292	0.00034526
M313	KIRC	4	34	M73	BUD31	RNA_SPLICING	1.76313	0.000349021
M298	KIRC	4	39	M71	ZDHHC3,SETMAR,GORASP1	NA	1.74173	0.000370659
M513	KIRC	4	11	M105	SPTY2D1	NA	0.572415	0.000373138
M965	KIRC	5	46	M388	FBN3	NA	1.7472	0.000376336
M108	KIRC	3	92	M9	RC3H2,RGP1,STX17	NA	0.571042	0.000397321
M874	KIRC	5	37	M318	PSMB4	MITOCHONDRIAL_TRANSLATIONAL_TERMINATION	1.74396	0.000434199
M345	KIRC	4	107	M75	HSPBP1,RBM42,CCDC124,SIRT6,FKBP8,TSSC4	NA	1.73837	0.000447678
M145	KIRC	3	26	M9	PMS1	NCRNA_PROCESSING	1.73294	0.00044932
M510	KIRC	4	348	M105	STRN,REST,GTF2A1,SBNO1,ZDHHC20,NHLRC2,ATF2,RAPGEF6,MGAT5,HIPK3,RBBP5,DDX21,PAFAH1B2,ADAM10,MAPK8,TGFBRAP1,C9orf41,LOC284441,LRCH3	DNA_REPLICATION	0.573239	0.000450532
M130	KIRC	3	40	M9		NA	0.578189	0.000467279
M18	KIRC	4	81	M4	CD19,POU2AF1,MGC29506	B_CELL_PROLIFERATION	1.72251	0.000504513
M987	KIRC	5	20	M405	SDHD,TSG101	AUTOPHAGOSOME_MATURATION	0.583558	0.00051166
M1476	KIRC	6	31	M1102	TOP2A	ORGANELLE_FISSION	1.71906	0.000521278
M551	KIRC	4	49	M113	SLC30A6	CLATHRIN_COAT_ASSEMBLY	0.580641	0.000526783
M96	KIRC	3	57	M7	SFTA2,LECT1,ABCA4	THYROID_HORMONE_GENERATION	1.71198	0.000545165
M438	KIRC	4	67	M101	MLL4,SIN3B	NA	1.70828	0.000558009
M401	KIRC	4	29	M92		CHROMATIN_ASSEMBLY	1.72452	0.000566037
M36	KIRC	3	116	M6	USH1C,ENPP3,LOC100131551	STEROID_METABOLIC_PROCESS	0.584821	0.000570454
M731	KIRC	6	22	M212	FSCN1,MARCKSL1	NA	1.7081	0.000572915
M756	KIRC	6	123	M216	MYCT1,CYYR1,S1PR1,MMRN2,FLT1,LDB2	SPROUTING_ANGIOGENESIS	0.584864	0.000613438
M867	KIRC	5	13	M314	BAD,BSCL2	NA	1.71341	0.000630507
M836	KIRC	5	10	M305	ATG4D,C6orf136	NA	0.585308	0.000642442
M901	KIRC	5	20	M345	CCDC124,FKBP8	REGULATION_OF_PROTEIN_COMPLEX_STABILITY	1.70625	0.000651637
M315	KIRC	4	33	M73	MRPL55	NA	1.70754	0.000685353
M1162	KIRC	5	46	M545	TTBK2,MYO9A	NA	0.584969	0.000692529
M327	KIRC	4	10	M73	TWF2	NA	1.69443	0.000709621
M1071	KIRC	5	12	M450	C9orf37,NDOR1	NA	1.69517	0.00070977
M958	KIRC	5	15	M377	KLK6,KLK7	EXCRETION	1.6925	0.000756577
M1209	KIRC	5	17	M622	HIAT1	NA	0.592915	0.000783466
M312	KIRC	4	77	M73	ROMO1,POLR2L	NA	1.69254	0.000805767
M316	KIRC	4	57	M73	TRAPPC5,C19orf24,FAM108A1,ZNF524	NEGATIVE_REGULATION_OF_PROTEIN_MODIFICATION_BY_SMALL_PROTEIN_CONJUGATION_OR_REMOVAL	1.69524	0.000806033
M1018	KIRC	5	29	M423	TRPV1,MSH5	NA	1.68095	0.000841608
M663	KIRC	4	10	M154	WASF2	NA	0.590436	0.000862931
M491	KIRC	4	32	M102	C12orf48	NUCLEAR_TRANSPORT	1.68074	0.000884643
M154	KIRC	3	15	M9		NA	0.590616	0.000905497
M980	KIRC	5	16	M401	HIST1H2BF,HIST1H3D	CHROMATIN_ASSEMBLY	1.68564	0.000918062
M308	KIRC	4	168	M73	GADD45GIP1,MRPL28,POLR2I,MRPS34,TCEB2,DRAP1,RFXANK	PROTEIN_CONTAINING_COMPLEX_DISASSEMBLY	1.68672	0.000942026
M797	KIRC	5	66	M230	USH1C,CLRN3	VITAMIN_TRANSMEMBRANE_TRANSPORT	0.600188	0.000973028
M682	KIRC	6	34	M163	TYROBP,FCER1G	INTERLEUKIN_6_PRODUCTION	1.67505	0.000985762
M425	KIRC	4	214	M101	NKTR,ARGLU1,SFRS18,PNN,RBM25,ZFC3H1	RNA_SPLICING	1.67484	0.000990121
M701	KIRC	6	47	M176	MYO1F,PLCB2,PARVG	REGULATION_OF_LEUKOCYTE_DIFFERENTIATION	1.66985	0.00101339
M98	KIRC	3	54	M7	GDE1,PPIF,AAGAB,GLB1	NA	1.66605	0.00102451
M136	KIRC	3	31	M9	ZNF549	NA	0.594924	0.00103311
M76	KIRC	3	117	M7	INO80E,C7orf47,MXD3,ZNF205,TMUB1	NA	1.67667	0.00103896
M748	KIRC	6	109	M214	TAGLN,TPM2,DACT3,MEIS3,PTGIR,GGT5	NA	1.66677	0.00104135
M30	KIRC	4	23	M4	CAPZA1	RESPONSE_TO_INTERLEUKIN_18	1.66176	0.0011118
M69	KIRC	3	343	M7	COX5A,COX6A1,COX7B,NDUFS3,BICC1,ATP5L,C14orf2,C9orf23,NDUFA9,COX7A2,FUT11,COQ9,UBL5,ATP5J,GOT2,NDUFB1,C9orf123,MAML2,TACO1	ATP_SYNTHESIS_COUPLED_ELECTRON_TRANSPORT	1.66831	0.00111766
M282	KIRC	4	61	M69	COX5A	CELLULAR_RESPIRATION	1.66722	0.00113928
M1112	KIRC	5	126	M495	ASXL2,CCNT1,LMTK2,NCOA2,C1orf58,SMCR8	PEPTIDYL_TYROSINE_DEPHOSPHORYLATION	0.599355	0.00116139
M1250	KIRC	7	11	M682	FCER1G	NA	1.6597	0.0011759
M301	KIRC	4	23	M71	TBC1D1,KIF13B	NA	0.601215	0.00120397
M23	KIRC	4	36	M4	ODF3B	NA	1.66255	0.00125996
M863	KIRC	5	15	M312	POLR2L	NA	1.64847	0.00129159
M498	KIRC	4	47	M103	UHMK1,DNAJB14	NA	0.605122	0.00132001
M91	KIRC	3	39	M7	TCEB1,POLR2K	NA	1.65528	0.00132966
M103	KIRC	3	387	M9	ASXL2,TAOK1,UHMK1,CCNT1,APOOL,LMTK2,NCOA2,DNAJB14,C1orf58,NBEAL1,AVL9,SMCR8,WDR31,TRIM44,KIAA1958,TMEM184C	NA	0.602098	0.00132977
M1280	KIRC	7	67	M727	ISLR,PODN	BONE_DEVELOPMENT	1.64149	0.00135353
M485	KIRC	4	100	M102	TOP2A,CKAP2L,BUB1B,ASPM	CHROMOSOME_SEGREGATION	1.64262	0.00140226
M376	KIRC	4	35	M82	TFAP2B,TMPRSS4	RESPONSE_TO_FIBROBLAST_GROWTH_FACTOR	1.64388	0.00141988
M602	KIRC	4	16	M128	EXOC5	NA	0.60969	0.00145843
M1013	KIRC	5	64	M422	ATG16L2,KIAA0895L,ARHGAP33	NA	1.64142	0.00147134
M329	KIRC	4	12	M73	PSMB1	RRNA_METABOLIC_PROCESS	1.64505	0.00147955
M957	KIRC	5	17	M374	SEC13,C2orf67	NA	0.610915	0.00149436
M511	KIRC	4	66	M105	DPP8,HEATR5A	NA	0.607298	0.00149496
M140	KIRC	3	71	M9	GOLT1B,TWF1,ERGIC2,UBE2A	NA	1.64636	0.00150978
M638	KIRC	4	67	M140	GOLT1B,TWF1,ERGIC2	NA	1.64636	0.00150978
M1110	KIRC	5	27	M491	C12orf48	DNA_REPLICATION	1.63671	0.00152252
M891	KIRC	5	21	M339	RPL27A,RPL38	COTRANSLATIONAL_PROTEIN_TARGETING_TO_MEMBRANE	1.64672	0.00155014
M603	KIRC	4	17	M128	CNIH,EIF2S1	REGULATION_OF_ER_TO_GOLGI_VESICLE_MEDIATED_TRANSPORT	0.611352	0.00155508
M351	KIRC	4	36	M75	CCDC12	NA	1.63594	0.00157982
M527	KIRC	4	17	M105	ZNF568	NA	0.610499	0.00158438
M968	KIRC	5	21	M390	ZBTB47,LPHN1	NA	1.62146	0.00175818
M1512	KIRC	8	60	M1280	ISLR,PODN	EXTRACELLULAR_STRUCTURE_ORGANIZATION	1.62225	0.00175999
M634	KIRC	4	24	M139	SNX13,TMEM106B	NA	0.618159	0.00186131
M194	KIRC	5	11	M23	NFKB2	NA	1.62613	0.00186709
M727	KIRC	6	80	M212	ISLR,COL16A1,PODN	EXTRACELLULAR_STRUCTURE_ORGANIZATION	1.61779	0.00186738
M647	KIRC	4	28	M144	NPM1	REGULATION_OF_TRANSLATIONAL_INITIATION_BY_EIF2_ALPHA_PHOSPHORYLATION	0.616923	0.00187213
M141	KIRC	3	23	M9	ZNF225	NA	0.61437	0.00188048
M520	KIRC	4	18	M105	MTF1	REGULATION_OF_RNA_SPLICING	0.614115	0.00190093
M343	KIRC	4	16	M74	MRPS18B,RNF5	NA	0.618613	0.00190338
M307	KIRC	4	10	M73		NA	1.62348	0.00191272
M223	KIRC	5	115	M32	TSPAN7,GPR116,MPPED2,NDRG2,ANGPT1,NR3C2,HDGFRP3,FRY,FAM13C	NA	0.619468	0.00211666
M288	KIRC	4	30	M69	BICC1,FUT11	NA	0.619579	0.00213804
M325	KIRC	4	19	M73	SNRPG,TOMM5	NA	1.61621	0.00216996
M986	KIRC	5	13	M405	FBXO8,MAPKSP1	NA	0.623452	0.00217448
M1218	KIRC	5	14	M634	TMEM106B	NA	0.624133	0.00224676
M1233	KIRC	5	21	M646	MMADHC,HAT1	NA	0.623322	0.00226752
M1332	KIRC	7	109	M756	MYCT1,CYYR1,S1PR1,MMRN2,FLT1,LDB2	SPROUTING_ANGIOGENESIS	0.623358	0.00235419
M869	KIRC	5	36	M316	TRAPPC5	NA	1.60982	0.00243028
M255	KIRC	4	13	M46	UGT2A3	URONIC_ACID_METABOLIC_PROCESS	0.626691	0.00254144
M178	KIRC	5	45	M18	MGC29506,POU2AF1,LOC96610,FCRL5	NA	1.5984	0.00255107
M85	KIRC	3	62	M7	PRSS22,GRHL2	EPIDERMIS_DEVELOPMENT	1.59892	0.00264273
M505	KIRC	4	10	M103	RBM43	NA	0.626004	0.00290702
M1487	KIRC	6	12	M1157	RC3H2,RAD54L2,PI4KA	NA	0.627767	0.00303274
M1001	KIRC	5	14	M412	P4HB,GAPDH	GLYCOLYTIC_PROCESS_THROUGH_FRUCTOSE_6_PHOSPHATE	1.5818	0.00310651
M785	KIRC	6	37	M220	FHOD1,PLEKHG2,EML3	NA	1.58013	0.00313079
M496	KIRC	4	77	M103	TAOK1,NBEAL1	NA	0.629705	0.00313435
M1279	KIRC	7	11	M726		NA	1.56707	0.00343167
M587	KIRC	4	10	M123		NA	0.637402	0.00362545
M557	KIRC	4	16	M114	API5,GRINL1A	NA	0.638153	0.00372309
M775	KIRC	6	33	M218	PLSCR3,SYDE1,SORBS3	NA	1.56635	0.00376707
M411	KIRC	4	14	M97	SDF4	NA	1.56181	0.00389319
M1223	KIRC	5	13	M638	TWF1	NA	1.5658	0.0038972
M408	KIRC	4	10	M95	DHX36	NA	0.641786	0.00405844
M281	KIRC	4	67	M69	NDUFS3,COX7B,COX7A2,ATP5J	ATP_SYNTHESIS_COUPLED_ELECTRON_TRANSPORT	1.55828	0.00460113
M976	KIRC	5	16	M393	CYP2A6,SLC10A1,CYP2A7	MONOCARBOXYLIC_ACID_METABOLIC_PROCESS	1.55211	0.00473025
M373	KIRC	4	100	M81	UQCRC1,TEX264,EXOSC7,COX8A,TMEM111,ATP6V0C	CELLULAR_RESPIRATION	1.54883	0.00485063
M558	KIRC	4	21	M114	TFAM,MARCH5	NA	0.648036	0.00493107
M4	KIRC	3	1717	M2	NCKAP1L,MYO1F,SPI1,WAS,MS4A6A,SASH3,DEF6,CYBB,ACAP1,DOCK2,IKZF1,EVI2B,ARHGAP9,TYROBP,CD3E,PTPN7,GBP5,ITGAL,LIMD2,ARPC1B,CD96,CD86,PARVG,AIF1,FYB,KIAA1949,IKBKE,BTK,CD53,SAMHD1,ARRDC5,PLCB2,PSMA5,ZAP70,VAV1,FCER1G,CD19,PLEKHO1,FAM102B,IL2RG,SIRPG,PSTPIP1,SEPT1,SLAMF6,C3AR1,HAPLN3,PARP15,LIMK1,TLR8,ZEB2,POU2AF1,TBC1D10C,KCTD17,LCP1,LCK,TMC8,TLR7,PKD2L1,CD2,SH2D1A,LAG3,CD84,LAPTM5,HCLS1,ITGA4,GMIP,N…	T_CELL_ACTIVATION	1.54627	0.00494748
M135	KIRC	3	62	M9	SLC25A24,HIAT1,USP1	NA	0.647406	0.00497176
M372	KIRC	4	11	M80	MT1E	NA	1.54051	0.00498411
M1272	KIRC	7	68	M724	COL3A1,FAP,COL1A2	EXTRACELLULAR_STRUCTURE_ORGANIZATION	1.53835	0.00519083
M1172	KIRC	5	77	M561	BPTF,BIRC6,ASH1L	SPINDLE_ASSEMBLY	0.647623	0.0054028
M292	KIRC	4	102	M71	ATP6V1G3,FOXI1,BSND,HEPACAM2,ATP6V0A4	REGULATION_OF_PH	1.53987	0.00543037
M846	KIRC	5	23	M308	MRPS34,MRPL28	ESCRT_COMPLEX_DISASSEMBLY	1.54275	0.0055069
M339	KIRC	4	139	M74	RPL18,RPS11,RPS16,RPL27A,RPL38,RPL19	COTRANSLATIONAL_PROTEIN_TARGETING_TO_MEMBRANE	1.53904	0.0056528
M63	KIRC	3	11	M6	LRRC2	NA	1.52934	0.00574721
M495	KIRC	4	146	M103	ASXL2,CCNT1,NCOA2,LMTK2,C1orf58,SMCR8	NA	0.648823	0.00575009
M230	KIRC	4	79	M36	USH1C,CLRN3	AMYLOID_FIBRIL_FORMATION	0.654255	0.00596544
M1159	KIRC	5	17	M544	STX17	NA	0.651137	0.00600382
M1527	KIRC	8	70	M1332	MYCT1,LDB2	REGULATION_OF_POSITIVE_CHEMOTAXIS	0.653342	0.00602248
M779	KIRC	6	91	M219	TCF4,ETS1,PLSCR4,NRP1,ZEB1	SYNAPSE_ASSEMBLY	0.652597	0.0060233
M153	KIRC	3	22	M9	BAT2L1,ZC3H7B	NA	0.650336	0.00614924
M216	KIRC	5	396	M32	MYCT1,CDH5,CYYR1,ERG,MMRN2,CXorf36,COL4A1,PTPRB,S1PR1,KDR,TEK,PCDH12,PDGFD,CLEC14A,ECSCR,FLT1,CD34,LDB2,ESAM,RHOJ,APOLD1,NID1,MCAM,ANGPT2,PLXND1,ST6GALNAC3,TIE1	EXTRACELLULAR_STRUCTURE_ORGANIZATION	0.654189	0.00618035
M1080	KIRC	5	10	M460	ZNF431	NA	1.5268	0.00646816
M478	KIRC	4	14	M101	KIAA0556,ZDHHC7	NA	1.52099	0.00649912
M561	KIRC	4	111	M116	BPTF,ASH1L,BIRC6	PEPTIDYL_LYSINE_MODIFICATION	0.655951	0.00677883
M544	KIRC	4	38	M108	STX17	NA	0.658308	0.00716241
M1510	KIRC	8	60	M1272	COL3A1,COL1A2,FAP	EXTRACELLULAR_STRUCTURE_ORGANIZATION	1.50656	0.00772859
M866	KIRC	5	38	M314	AURKAIP1,UBE2J2,THAP3	NA	1.51095	0.0077609
M116	KIRC	3	135	M9	BPTF,ASH1L,BIRC6,USP34	PEPTIDYL_LYSINE_MODIFICATION	0.662285	0.00814486
M562	KIRC	4	12	M116	HTT	NA	0.661355	0.00828386
M1556	KIRC	7	19	M1492	TTBK2	NA	0.66154	0.00832499
M226	KIRC	4	12	M33	GALNT14	NA	0.665739	0.00840253
M285	KIRC	4	12	M69	TACO1	NA	1.51063	0.00843189
M660	KIRC	4	12	M153	BAT2L1,CBX6,ZC3H7B	NA	0.661285	0.00848219
M1450	KIRC	6	20	M1018	TRPV1,MSH5	NA	1.50098	0.00848691
M95	KIRC	3	94	M7	DLD,NDUFS1,HADHB,HIBADH	TRICARBOXYLIC_ACID_CYCLE	0.667045	0.00849362
M1083	KIRC	5	16	M463	ZNF345,ZNF529	NA	1.50646	0.00852343
M407	KIRC	4	84	M95	DLD,NDUFS1,HADHB,HIBADH	TRICARBOXYLIC_ACID_CYCLE	0.667237	0.00852346
M1050	KIRC	5	13	M439	FLJ45244,LOC100216545	NA	1.49928	0.00861357
M413	KIRC	4	36	M98	GDE1,AAGAB	LIPOSACCHARIDE_METABOLIC_PROCESS	1.50088	0.00864171
M995	KIRC	5	11	M407	NDUFS1	NA	0.668283	0.00881443
M623	KIRC	4	18	M135	CDC73	NA	0.667273	0.00890645
M1420	KIRC	6	11	M950	TEX264	NA	1.49954	0.00892317
M1366	KIRC	7	84	M779	TCF4,ETS1,ZEB1	SYNAPSE_ASSEMBLY	0.667134	0.00903262
M269	KIRC	4	13	M55	PIH1D2,CASC1	NA	0.668761	0.0091602
M314	KIRC	4	51	M73	AURKAIP1,BAD,THAP3,UBE2J2	NA	1.49819	0.00926268
M446	KIRC	4	35	M101	MTMR9L,VIP	NA	1.49483	0.00932003
M724	KIRC	6	112	M212	COL3A1,MICAL2,LTBP2,ITGA11,FAP,COL1A2	EXTRACELLULAR_STRUCTURE_ORGANIZATION	1.49089	0.0093899
M1117	KIRC	5	34	M498	UHMK1	NA	0.669283	0.00991984
M921	KIRC	5	13	M354	RFNG	NA	1.4899	0.010259
M1492	KIRC	6	24	M1162	TTBK2	NA	0.670662	0.0103399
M113	KIRC	3	66	M9	SLC30A6,SEC23IP	ESTABLISHMENT_OF_ORGANELLE_LOCALIZATION	0.671982	0.010385
M1363	KIRC	7	12	M777	ARHGDIB	NA	1.48127	0.0107244
M598	KIRC	4	11	M127	TECPR2	NA	0.67332	0.0107917
M622	KIRC	4	32	M135	USP1,HIAT1	NA	0.675068	0.0109312
M429	KIRC	4	52	M101	ZBTB48,UBXN11	NA	1.4805	0.0112203
M399	KIRC	4	11	M91	GTF2A2	NA	1.48687	0.0115651
M644	KIRC	4	12	M143	ATAD2B	NA	1.47452	0.0115713
M170	KIRC	5	11	M13	GMFG	NA	1.47819	0.0116852
M437	KIRC	4	18	M101	MIB2	NA	1.46843	0.0124207
M950	KIRC	5	16	M373	TEX264	NA	0.678868	0.0126344
M636	KIRC	4	10	M139	C5orf44	NA	0.681948	0.0128698
M780	KIRC	6	14	M219	PDE3A	NA	0.679656	0.0129653
M1221	KIRC	5	30	M638	GOLT1B,ERGIC2	NA	1.4685	0.0131568
M920	KIRC	5	10	M354	INO80E,CEMP1	NA	1.46672	0.0136993
M1160	KIRC	5	11	M544	NFX1	NA	0.681602	0.0138559
M1155	KIRC	5	14	M540	KIAA0776	NA	0.684303	0.0141401
M1088	KIRC	5	11	M469	LRRC48,TTC25	NA	0.684807	0.0141425
M872	KIRC	5	25	M317	SSNA1	NA	1.46011	0.0143424
M146	KIRC	3	12	M9	SLC35A5,TBC1D23	NA	0.686646	0.0144293
M596	KIRC	4	22	M126	PKN2	NA	0.686232	0.0146811
M1170	KIRC	5	45	M556	UEVLD	NA	0.685723	0.0147317
M42	KIRC	3	34	M6	SLC7A9,AGXT2	XENOBIOTIC_GLUCURONIDATION	0.689799	0.0152812
M830	KIRC	5	10	M300	SLC43A1	NA	1.45236	0.0155625
M922	KIRC	5	12	M354	C16orf48	NA	1.44584	0.0173304
M302	KIRC	4	19	M71	ITGB1BP3,PLK5P,TRIM67	NA	1.44344	0.0174366
M641	KIRC	4	34	M142	SACM1L,GPD1L	NA	0.694217	0.0178824
M1338	KIRC	7	10	M764	RASIP1	NA	0.695043	0.0184
M643	KIRC	4	52	M143	CEP170,APAF1,HEATR1,WDR26	EXECUTION_PHASE_OF_APOPTOSIS	1.43384	0.0188844
M462	KIRC	4	14	M101	NEURL4	HIPPO_SIGNALING	1.43468	0.0189705
M770	KIRC	6	19	M217	CRIP2,INF2	CELLULAR_RESPONSE_TO_ELECTRICAL_STIMULUS	0.69796	0.0193119
M53	KIRC	3	19	M6	ASPDH	CELLULAR_DETOXIFICATION	0.699008	0.0193342
M1230	KIRC	5	38	M643	CEP170,CCDC88A,APAF1	NA	1.43154	0.0194821
M1310	KIRC	7	40	M748	TAGLN,DACT3	NA	1.43324	0.0194913
M625	KIRC	4	22	M136	ZNF549	NA	0.696222	0.0195849
M1212	KIRC	5	10	M623	CDC73	NA	0.698385	0.0196529
M347	KIRC	4	14	M75	CCDC85B,FAM176B	NA	1.43373	0.0198243
M158	KIRC	5	103	M11	CD3E,SIRPG,LAG3,CD3D,CD27,LCK,CD2	T_CELL_ACTIVATION	1.43208	0.0199647
M840	KIRC	5	12	M305	POLR2E	NA	0.700803	0.0202557
M607	KIRC	4	20	M131	DPY30	NA	1.43584	0.0206073
M11	KIRC	4	252	M4	CD3E,GBP5,CD96,SIRPG,SLAMF6,CD2,SH2D1A,LAG3,TAP1,LCK,TIGIT,CD3D,CD27,RHOH,EOMES	T_CELL_ACTIVATION	1.42873	0.0207919
M317	KIRC	4	38	M73	SSNA1	NA	1.42807	0.0209037
M1244	KIRC	7	62	M676	CD3E,LCK,CD3D	T_CELL_ACTIVATION	1.42859	0.0210848
M1561	KIRC	9	31	M1508	SASH3	LEUKOCYTE_MIGRATION	1.42405	0.0217392
M143	KIRC	3	72	M9	CEP170,CCDC88A,APAF1,HEATR1,WDR26	NA	1.41824	0.0226261
M951	KIRC	5	51	M373	UQCRC1,TMEM111	CELLULAR_RESPIRATION	1.42143	0.0226321
M538	KIRC	4	48	M106	SHPRH,ZNF192	NA	0.702452	0.0230581
M1356	KIRC	7	15	M772	CD248	NA	1.41849	0.0230905
M451	KIRC	4	46	M101	ZNF587,ZNF417	NA	1.41556	0.0240697
M537	KIRC	4	70	M106	LATS1	NA	0.70676	0.0247982
M332	KIRC	4	11	M73	PSMA2	NA	1.41487	0.0248016
M733	KIRC	6	14	M212	TLN1	CELL_JUNCTION_ORGANIZATION	0.707682	0.0256656
M74	KIRC	3	228	M7	RPL18,RPS16,RPS11,RPS3,RPL27A,RPL38,RPS5,RPL19	COTRANSLATIONAL_PROTEIN_TARGETING_TO_MEMBRANE	1.4118	0.0257485
M55	KIRC	3	27	M6	PIH1D2	NA	0.709525	0.0259644
M2	KIRC	2	4903	M1	TCF4,NCKAP1L,GPR124,ADAM12,ISLR,MYCT1,GFPT2,SLPI,SAA1,C1R,NOTCH3,MYO1F,ERG,COL5A1,COL3A1,PDGFRB,SPI1,LUM,WAS,CDH5,CXorf36,MS4A6A,CD93,TAGLN,ELK3,SASH3,NOTCH4,ARHGEF15,PDLIM7,COL1A1,DEF6,CYBB,LHFP,ACAP1,CYYR1,MMRN2,DOCK2,IKZF1,EVI2B,FLI1,EMILIN1,TGFBI,ARHGAP9,TYROBP,PDGFRA,GPR116,SYNPO2,CD3E,FLT4,LEPRE1,TPM2,COL4A1,PTPN7,GBP5,MICAL2,TIMP1,TSPAN7,HSPB6,IL20RB,SRPX2,ITGAL,LIMD2,DOCK9,PODN,DCN,PCDH12…	EXTRACELLULAR_STRUCTURE_ORGANIZATION	1.4072	0.0262995
M454	KIRC	4	10	M101	PARP10	NA	1.40773	0.0263017
M1491	KIRC	6	11	M1159	STX17	NA	0.7122	0.0278631
M144	KIRC	3	62	M9	MMADHC,YIPF5	RIBOSOMAL_LARGE_SUBUNIT_BIOGENESIS	0.713827	0.0280601
M106	KIRC	3	167	M9	LATS1,SHPRH,ZNF192,CDC40	PROTEIN_POLYUBIQUITINATION	0.71251	0.0280793
M217	KIRC	5	349	M32	NOTCH4,ARHGEF15,FLT4,RASIP1,TMEM88,NOVA2,ARAP3,C3orf54,USHBP1,RAMP3,ADCY4,SLC9A3R2,GJA4,ENG,ROBO4,SCN4A,C20orf160,RGS5,DOCK6,PDE2A,PEAR1,HRC,SH2D3C,AGTR1,VWA1,KANK3,BTNL9,CRIP2,SOX18	ENDOTHELIUM_DEVELOPMENT	0.713326	0.0287725
M766	KIRC	6	15	M217	CPA3,MS4A2	REGULATION_OF_ANGIOTENSIN_LEVELS_IN_BLOOD	0.715392	0.0289376
M809	KIRC	5	18	M281	COX7B,COX7A2,ATP5L	OXIDATIVE_PHOSPHORYLATION	1.40036	0.0301701
M220	KIRC	5	47	M32	FHOD1,PLEKHG2	NA	1.39307	0.0306501
M16	KIRC	4	140	M4	MYO1F,SASH3,ITGAL,PLCB2,VAV1,HCLS1,PARVG	LEUKOCYTE_MIGRATION	1.39233	0.0314442
M1311	KIRC	7	24	M748	PTGIR	NA	1.39086	0.0315895
M114	KIRC	3	129	M9	UEVLD,CSNK2A1P,API5,SLC25A40,TFAM,EIF4G2	NA	0.718369	0.0316101
M676	KIRC	6	80	M158	CD3E,LCK,CD3D,CD2	T_CELL_ACTIVATION	1.39328	0.031644
M1340	KIRC	7	13	M764	PDE2A	INTERLEUKIN_8_SECRETION	0.718563	0.0319298
M110	KIRC	3	118	M9	MYSM1,TTBK2,MYO9A,SMG1,KIAA1109	NA	0.717033	0.0323277
M1210	KIRC	5	15	M622	USP1,DEK	NA	0.720869	0.0331223
M142	KIRC	3	67	M9	SACM1L,PNPLA8,ARL8B	RESPONSE_TO_STARVATION	0.722046	0.0339668
M227	KIRC	4	13	M33	HSD3B7	NA	1.38462	0.0354138
M549	KIRC	4	21	M111	ARFGEF2	REGULATION_OF_SMALL_GTPASE_MEDIATED_SIGNAL_TRANSDUCTION	0.723282	0.0354667
M646	KIRC	4	34	M144	MMADHC,ZC3H15,HAT1	NA	0.724609	0.0356563
M398	KIRC	4	12	M91	POLR2K	NA	1.3818	0.0357479
M188	KIRC	5	14	M21	S100A8	DEFENSE_RESPONSE_TO_FUNGUS	1.3823	0.0358698
M992	KIRC	5	30	M407	DLD,HIBADH	AEROBIC_RESPIRATION	0.725301	0.035936
M1422	KIRC	6	43	M951	UQCRC1	CELLULAR_RESPIRATION	1.38092	0.036063
M728	KIRC	6	26	M212	HSPB6	MUSCLE_SYSTEM_PROCESS	1.37972	0.0362669
M126	KIRC	3	52	M9	CREB1,PKN2	NA	0.725743	0.0373691
M305	KIRC	4	263	M72	NDUFB7,NUBP2,C19orf70,NDUFS7,NDUFA11,UQCR11,DCI,NDUFA13,TIMM13,COPE,PRDX5,HAGH,ATP5D,FAM195A,ACADS,POLR2E	NADH_DEHYDROGENASE_COMPLEX_ASSEMBLY	1.37824	0.0375861
M479	KIRC	4	12	M101	IFT140	NEURAL_TUBE_DEVELOPMENT	1.37499	0.03765
M1074	KIRC	5	27	M451	ZNF587	NA	1.37459	0.0387318
M667	KIRC	6	14	M156	C1QB	SYNAPSE_PRUNING	1.37084	0.0398688
M556	KIRC	4	61	M114	UEVLD,SLC25A40,EIF4G2	ENDOPLASMIC_RETICULUM_TO_GOLGI_VESICLE_MEDIATED_TRANSPORT	0.73132	0.0418895
M545	KIRC	4	95	M110	MYSM1,TTBK2,MYO9A,SMG1,KIAA1109	NA	0.730099	0.0424969
M808	KIRC	5	15	M281	C14orf2,NDUFB1	NA	1.36824	0.0425686
M1508	KIRC	8	42	M1253	SASH3,ITGAL	LEUKOCYTE_MIGRATION	1.36331	0.0438971
M977	KIRC	5	13	M393	APOA5	ORGANIC_HYDROXY_COMPOUND_TRANSPORT	1.36332	0.0444034
M812	KIRC	5	16	M284	ERH	NA	1.3627	0.0453918
M1390	KIRC	6	82	M833	NDUFB7,NDUFA11,C19orf70,NDUFA13	MITOCHONDRIAL_ELECTRON_TRANSPORT_NADH_TO_UBIQUINONE	1.35688	0.0479847
M117	KIRC	3	88	M9	MLL2,C12orf51,EP400,SRRM2,ZBTB40	COVALENT_CHROMATIN_MODIFICATION	1.35371	0.0484925
M793	KIRC	6	36	M223	GPR116,FAM13C	NA	0.737797	0.0491904
M1087	KIRC	5	13	M466	MBTD1	NA	1.35189	0.0495956
M355	KIRP	3	55	M59	LDHD,COQ9,UQCRC1,PET112L	COENZYME_BIOSYNTHETIC_PROCESS	0.161555	1.04678e-05
M59	KIRP	2	100	M4	COQ9,LDHD,UQCRC1,PET112L	COENZYME_BIOSYNTHETIC_PROCESS	0.163576	1.20435e-05
M87	KIRP	4	76	M8	KCNK12,SPATA18,HHIPL2,ZIC2,SYPL2	REGIONALIZATION	5.35675	1.93576e-05
M376	KIRP	3	13	M63	POM121L2	NA	4.68431	3.88856e-05
M532	KIRP	5	26	M87	SPATA18,SYPL2,ZIC2	APPENDAGE_MORPHOGENESIS	0.239308	0.000137521
M235	KIRP	3	24	M29	PDF	NA	0.258331	0.000153339
M531	KIRP	5	40	M87	KCNK12,HHIPL2	NA	4.12498	0.00015974
M749	KIRP	4	17	M204	ASPM,CENPF	METAPHASE_PLATE_CONGRESSION	4.01941	0.000208556
M765	KIRP	4	18	M214	MED11	NEGATIVE_REGULATION_OF_FATTY_ACID_BIOSYNTHETIC_PROCESS	0.271329	0.00021134
M386	KIRP	3	18	M67	TBX5	NA	3.81143	0.000213607
M1281	KIRP	5	58	M751	CEP55,TOP2A	CHROMOSOME_SEGREGATION	3.65239	0.00021533
M539	KIRP	5	10	M91		NA	3.74984	0.000253587
M24	KIRP	2	129	M4	PSMB6,MED11,TIMM22,TRAPPC1	ORGANIC_HYDROXY_COMPOUND_METABOLIC_PROCESS	0.266011	0.000265586
M204	KIRP	3	32	M22	CENPF,ASPM	MITOTIC_SISTER_CHROMATID_SEGREGATION	3.52133	0.000329975
M977	KIRP	4	30	M355	UQCRC1,LDHD	MONOCARBOXYLIC_ACID_METABOLIC_PROCESS	0.285879	0.000348165
M751	KIRP	4	120	M205	CEP55,TPX2,KIF4A,TOP2A,HJURP,CDK1	MITOTIC_NUCLEAR_DIVISION	3.47439	0.000371164
M536	KIRP	5	26	M90	ASRGL1	RESPONSE_TO_FORSKOLIN	3.81136	0.000371335
M206	KIRP	3	33	M22	TROAP	CHROMOSOME_SEGREGATION	3.47142	0.000375239
M976	KIRP	4	21	M355	COQ9	NA	0.278041	0.000398665
M303	KIRP	3	16	M47	CDK10	NA	0.288566	0.000407751
M1353	KIRP	5	24	M977	LDHD,UQCRC1	THIOESTER_BIOSYNTHETIC_PROCESS	0.291962	0.000434149
M1279	KIRP	5	15	M751	HJURP	REGULATION_OF_CYCLIN_DEPENDENT_PROTEIN_KINASE_ACTIVITY	3.53578	0.000474072
M288	KIRP	3	32	M45	ATP5A1,C18orf55	NA	0.282493	0.000476621
M538	KIRP	5	20	M90	STK32B	NA	0.308454	0.000588018
M914	KIRP	4	19	M288	C18orf55,ATP5A1,AFG3L2	NA	0.302099	0.000639156
M330	KIRP	3	17	M53		GUANOSINE_CONTAINING_COMPOUND_METABOLIC_PROCESS	0.307776	0.00075254
M556	KIRP	5	17	M97	UPK2,UPK1A	NA	3.2477	0.000757979
M22	KIRP	2	268	M4	CEP55,TOP2A,HJURP,TPX2,KIF4A,CDK1,TROAP,CDC6,ASPM,AURKB,ASF1B,KIF11,EXO1,PKMYT1,CENPF,ATAD2	CHROMOSOME_SEGREGATION	3.12563	0.000820963
M1126	KIRP	5	19	M463	KCTD15	NA	3.35654	0.000841579
M214	KIRP	3	68	M24	PSMB6,MED11,TRAPPC1	NA	0.317983	0.000907669
M327	KIRP	3	20	M53	SUCLA2	TRICARBOXYLIC_ACID_CYCLE	0.323276	0.000918025
M1335	KIRP	5	49	M908	ATP5B	ORGANIC_ACID_CATABOLIC_PROCESS	0.314009	0.000924868
M212	KIRP	3	20	M23	SLC7A11,JAKMIP3,PANX2	RESPONSE_TO_ISCHEMIA	3.1679	0.000975172
M215	KIRP	3	41	M24	TIMM22	NA	0.303386	0.000998834
M753	KIRP	4	24	M206	TROAP,CDCA3	MITOTIC_SPINDLE_ORGANIZATION	3.06505	0.0009997
M768	KIRP	4	36	M215	TIMM22	NA	0.315389	0.00100447
M205	KIRP	3	129	M22	CEP55,TPX2,KIF4A,TOP2A,HJURP,CDK1	CHROMOSOME_SEGREGATION	3.06162	0.00101098
M908	KIRP	4	68	M286	ATP5B,IMMT,SDHA	ENERGY_DERIVATION_BY_OXIDATION_OF_ORGANIC_COMPOUNDS	0.31764	0.00103756
M1408	KIRP	6	14	M1125	RTDR1	NA	3.14395	0.00106513
M507	KIRP	5	18	M81	RHOG,NFKB2	GERMINAL_CENTER_FORMATION	3.05301	0.00108623
M1280	KIRP	5	13	M751	CCNB1	REGULATION_OF_CYCLIN_DEPENDENT_PROTEIN_KINASE_ACTIVITY	2.95528	0.00112297
M53	KIRP	2	131	M4	NDUFS1,ALDH6A1,MUT,SUCLA2,GFM1,LARS2	SMALL_MOLECULE_CATABOLIC_PROCESS	0.330307	0.00114678
M168	KIRP	3	13	M16	MTHFD2	AMINO_ACID_ACTIVATION	3.08915	0.00126209
M67	KIRP	2	58	M4	TUBA3C,TBX5,PAGE5,CALN1	NA	3.06737	0.00134824
M242	KIRP	3	13	M30	BCLAF1	NA	2.98331	0.00135847
M207	KIRP	3	26	M22	CDC6,DTL	DNA_REPLICATION	2.90189	0.00143091
M993	KIRP	4	12	M386	TBX5	NA	3.03763	0.00149754
M156	KIRP	3	16	M16	C1orf55	NA	3.02958	0.00153777
M339	KIRP	3	11	M55		NA	3.01431	0.00160667
M61	KIRP	2	27	M4		CHROMATIN_ASSEMBLY	2.90402	0.001737
M824	KIRP	4	19	M239	SENP1	NA	2.90078	0.00185587
M504	KIRP	5	17	M81	GPR68,SP140	NA	2.87614	0.00190652
M1111	KIRP	5	76	M462	KCNJ16,EMX2OS,MITF,EMX2,CASC1	NA	0.356658	0.00193865
M103	KIRP	4	38	M8	FAM171B	NA	2.82844	0.00224182
M759	KIRP	4	11	M212	SLC7A11	NA	2.82647	0.00225715
M1288	KIRP	5	15	M768	TIMM22	NA	0.360653	0.0022875
M54	KIRP	2	37	M4	NOP58,CCDC59,SSB	RIBOSOME_BIOGENESIS	2.82006	0.0023154
M518	KIRP	5	57	M84	AMN,TSPAN5	PROTEOGLYCAN_BIOSYNTHETIC_PROCESS	2.81585	0.00240789
M216	KIRP	3	20	M24	URGCP	NA	0.358508	0.00260431
M334	KIRP	3	12	M53	STYK1,KLF15	NA	2.66388	0.00273582
M511	KIRP	5	33	M82	PECAM1	NEGATIVE_REGULATION_OF_CELL_GROWTH	2.70284	0.00278893
M1477	KIRP	7	13	M1378	CASC1	NA	0.36143	0.00280604
M1169	KIRP	6	126	M517	ACY3,PDZD3,RDH5	NA	0.362756	0.00289122
M567	KIRP	5	25	M103	FAM171B,ELOVL4	NA	2.74849	0.00296758
M1488	KIRP	7	10	M1397	KRT39	NA	2.74152	0.00303402
M764	KIRP	4	24	M214	PSMB6	NA	0.371928	0.00304215
M286	KIRP	3	110	M45	ATP5B,IMMT,ATP5G3,NDUFA9,SLC25A3,SDHA	ENERGY_DERIVATION_BY_OXIDATION_OF_ORGANIC_COMPOUNDS	0.367106	0.00324159
M308	KIRP	3	31	M48	CDC73	NA	2.79801	0.00326469
M372	KIRP	3	32	M63	CCT3	RESPONSE_TO_INTERLEUKIN_7	2.77997	0.00358344
M1065	KIRP	5	10	M437	C19orf76,DMPK	NA	2.62968	0.00362068
M1378	KIRP	6	23	M1111	CASC1	NA	0.372579	0.00372267
M236	KIRP	3	31	M29	ECHS1,ACY1,ACAA1,PCYT2	SALIVARY_GLAND_DEVELOPMENT	2.60762	0.00396673
M517	KIRP	5	160	M84	ACY3,PDZD3,RDH5	NA	0.38985	0.00464201
M1109	KIRP	5	187	M462	SATB2,LOC723809,NOL4,AKAP5,FHL1,GRM5,HYDIN,WNT5A	UROGENITAL_SYSTEM_DEVELOPMENT	0.382474	0.00474448
M1121	KIRP	5	39	M463	CCDC65,TMEM98	NA	0.391405	0.00477514
M537	KIRP	5	15	M90	TPK1	NA	2.68058	0.00492899
M9	KIRP	3	96	M3	AMAC1,PABPC1P2,FLJ45079,ZSCAN10	NA	2.50865	0.00507415
M1473	KIRP	7	113	M1375	SATB2,FHL1	NEURON_PROJECTION_GUIDANCE	0.386363	0.00525024
M447	KIRP	4	36	M71	DTX3,ZNF853	NA	0.386776	0.00530599
M129	KIRP	3	53	M11	ARMC1,MTDH	NA	2.4807	0.0054178
M1478	KIRP	7	10	M1378		NA	0.397134	0.00547384
M408	KIRP	4	27	M68	SR140,ATAD5	REGULATION_OF_MITOCHONDRIAL_MEMBRANE_POTENTIAL	2.4702	0.00560833
M662	KIRP	4	13	M152	CLTC	NA	2.45879	0.00578688
M209	KIRP	3	12	M22	BRCA2	NA	2.49971	0.00617908
M271	KIRP	3	22	M39	L2HGDH	NA	0.40224	0.00619028
M1397	KIRP	6	19	M1117	COBL	CORNIFICATION	2.5261	0.00647395
M1403	KIRP	6	31	M1121	CCDC65,TMEM98,C5orf49,C1orf88	NA	0.41122	0.00647992
M952	KIRP	4	14	M327	SUCLA2	TRICARBOXYLIC_ACID_CYCLE	0.405143	0.0065623
M1411	KIRP	6	11	M1126	KCTD15	NA	2.46978	0.00659198
M90	KIRP	4	63	M8	ASRGL1,STK32B	NA	0.386395	0.00681688
M444	KIRP	4	47	M71	POGZ,KIAA0907,ZC3H11A,SFRS1	MRNA_TRANSPORT	2.41675	0.00683952
M1385	KIRP	6	34	M1113	DNAL1	NA	0.39824	0.00693983
M358	KIRP	3	20	M59	IDH3B	NA	0.398704	0.0069616
M742	KIRP	4	14	M199	LSM2	NA	2.45567	0.00697828
M786	KIRP	4	10	M227	H2AFX	NA	2.461	0.00700496
M84	KIRP	4	306	M8	ACY3,AMN,SLC39A5,PDZD3,TMEM82,RDH5,LOC151534,LGALS2,NIT2,CLRN3,LYG1,C14orf73,TSPAN5	AMINO_ACID_TRANSPORT	0.408989	0.00713393
M86	KIRP	4	139	M8	GLYAT,ACSM2A,TMEM27,GBA3,TFAP2A	ORGANIC_ANION_TRANSPORT	0.401399	0.00734496
M137	KIRP	3	15	M11		NA	0.423159	0.00777577
M293	KIRP	3	19	M45	PPARGC1A,SOX6	SUSCEPTIBILITY_TO_NATURAL_KILLER_CELL_MEDIATED_CYTOTOXICITY	0.419431	0.0077878
M1161	KIRP	6	10	M504	SP140	NA	2.41852	0.00796063
M1375	KIRP	6	145	M1109	SATB2,FHL1,GRM5,HYDIN,NOL4	UROGENITAL_SYSTEM_DEVELOPMENT	0.414286	0.00798914
M909	KIRP	4	12	M286	NDUFA9	NA	0.414321	0.00808012
M192	KIRP	3	26	M20	MRPL9,SNRPE	NA	2.41058	0.00809909
M280	KIRP	3	128	M43	CASP8AP2,AHCTF1,CEP350,ARID4B,TPR	RRNA_METABOLIC_PROCESS	2.38782	0.00833442
M930	KIRP	4	25	M308	CDC73	NA	2.45349	0.00834946
M1172	KIRP	6	31	M518	AMN	NA	2.38622	0.00894532
M175	KIRP	3	22	M17	TXN2	NA	0.427272	0.00905526
M122	KIRP	3	10	M11	DHX9	NA	2.42915	0.00913849
M462	KIRP	4	621	M72	SATB2,CREB5,LRRK2,AK7,DNAL1,PKHD1,FLJ32063,LRRN4,KCNJ16,LOC723809,CASC1,COBL,AKAP5,GPR125,VCAN,ITGB8,LFNG,ID1,TMEM43,HRH1,NOL4,RYR3,GRM5,HYDIN,TMEM130,FSTL1,GNAI1,FHL1,DACT2,EREG,C14orf45,ID4,EMX2OS,SMAD6,UPK1B,MITF,TNFRSF19,WNT5A,ISPD,DNAH7,B3GALT5	RENAL_SYSTEM_DEVELOPMENT	0.422578	0.00954866
M27	KIRP	2	174	M4	KRTCAP2,PSMB4,SNRPA,DPM3,SCNM1,PSMD4,MXD3,JTB,DCAF15,RAVER1	RNA_SPLICING	2.36268	0.00969624
M253	KIRP	3	13	M33	ALG3,NME1	POSITIVE_REGULATION_OF_CIRCADIAN_RHYTHM	2.32137	0.00980408
M451	KIRP	4	18	M71	FLJ37453,C5orf55,LOC147727	NA	0.424214	0.00990494
M826	KIRP	4	13	M239		NA	2.28399	0.0100854
M229	KIRP	3	34	M27	RAVER1	NA	2.35135	0.0100862
M105	KIRP	4	78	M9	AMAC1,PABPC1P2,FLJ45079,ZSCAN10	SENSORY_PERCEPTION_OF_LIGHT_STIMULUS	2.29275	0.0102902
M756	KIRP	4	38	M210	AKR1B10,EPHX1	GLYCOSIDE_METABOLIC_PROCESS	2.34749	0.0103943
M277	KIRP	3	19	M41	AMT	NA	0.427666	0.0106436
M41	KIRP	2	34	M4	AMT	NA	0.429807	0.0111632
M718	KIRP	4	12	M188	NACA,RPL6	NA	2.23455	0.0111694
M93	KIRP	4	116	M8	AGXT2,KHK,AGMAT,PEPD,GPD1	EMBRYONIC_SKELETAL_SYSTEM_DEVELOPMENT	0.437543	0.0112422
M109	KIRP	3	28	M10	COPS5	TRANSCRIPTION_COUPLED_NUCLEOTIDE_EXCISION_REPAIR	2.278	0.0116005
M413	KIRP	4	18	M68	PLXNB1	KIDNEY_MORPHOGENESIS	0.443544	0.0125458
M417	KIRP	4	10	M68	TRIM2,ZBTB8A	NA	0.446609	0.0135824
M488	KIRP	5	13	M78	LOC96610	NA	2.21379	0.0137507
M180	KIRP	3	29	M19	RPL19	TRANSLATIONAL_INITIATION	2.19996	0.0138721
M43	KIRP	2	182	M4	CASP8AP2,ZNF644,AHCTF1,CEP350,PKN2,ARID4B,TPR,ZNF292,HEATR1	RRNA_METABOLIC_PROCESS	2.23337	0.0140788
M72	KIRP	3	830	M5	SATB2,CREB5,ZMYND10,LRRK2,AK7,SPEF1,CASC1,DNAL1,PKHD1,FLJ32063,LRRN4,CCDC65,KCNJ16,LOC723809,TTC25,COBL,LRRC50,AKAP5,GPR125,VCAN,CCDC135,ITGB8,RTDR1,LFNG,ID1,TMEM43,HRH1,NOL4,RYR3,GRM5,HYDIN,TMEM130,FSTL1,GNAI1,FHL1,C17orf72,DACT2,TMEM98,EREG,LRRC48,MORN5,C14orf45,ID4,EMX2OS,SMAD6,UPK1B,MITF,TNFRSF19,WNT5A,ISPD,DNAH7,C22orf36,B3GALT5,TSGA14,KCTD15	RENAL_SYSTEM_DEVELOPMENT	0.442178	0.0141487
M1122	KIRP	5	41	M463	SPEF1,CCDC135	NA	0.447506	0.0142866
M1076	KIRP	5	16	M440	KAT2A	NEGATIVE_REGULATION_OF_CELL_CYCLE_PROCESS	2.17672	0.0154231
M626	KIRP	4	17	M133	ITFG1,GLB1	KERATAN_SULFATE_CATABOLIC_PROCESS	0.454299	0.015561
M547	KIRP	5	27	M93	AGMAT	DICARBOXYLIC_ACID_METABOLIC_PROCESS	0.459815	0.0158212
M763	KIRP	4	17	M214		REGULATION_OF_PROTEIN_COMPLEX_DISASSEMBLY	0.45668	0.0158487
M875	KIRP	4	10	M264	MRPL3	NA	2.26793	0.0162918
M45	KIRP	2	294	M4	ATP5B,UQCRFS1,ATP5A1,IMMT,SLC25A5,AFG3L2,ATP5G3,EARS2,GHITM,NDUFA9,SLC25A4,PPARGC1A,HSPA9,SLC25A3,SDHA,VDAC1	CELLULAR_RESPIRATION	0.458161	0.0165629
M602	KIRP	4	10	M123	SLC41A2	NA	2.15035	0.0168528
M120	KIRP	3	14	M11	COPA	RETROGRADE_VESICLE_MEDIATED_TRANSPORT_GOLGI_TO_ENDOPLASMIC_RETICULUM	2.17586	0.0169458
M527	KIRP	5	76	M86	GLYAT,GBA3	ORGANIC_ANION_TRANSPORT	0.452131	0.0170047
M1337	KIRP	5	24	M912	UQCRFS1	CELLULAR_RESPIRATION	0.465415	0.0170604
M1377	KIRP	6	32	M1111	KCNJ16	NA	0.475753	0.0177538
M1190	KIRP	6	20	M547	AGMAT	DICARBOXYLIC_ACID_METABOLIC_PROCESS	0.471438	0.0181131
M912	KIRP	4	38	M287	UQCRFS1	CELLULAR_RESPIRATION	0.471929	0.0191494
M783	KIRP	4	35	M227	KRTCAP2	NA	2.13748	0.0197177
M3	KIRP	2	1564	M1	ACY3,GLYAT,PKLR,AGXT2,KHK,LRP2,ACSM2A,AMAC1,ANKS4B,AMN,TRIM10,SLC39A5,AGMAT,PDZD3,AIFM1,SLC7A9,FMO1,ASRGL1,DAO,PABPC1P2,TMEM27,CLRN3,FLJ45983,PDZK1,CUBN,KCNK12,PEPD,DDC,SPATA18,HGD,GRHL2,HAO2,RDH5,FAM171B,ASPDH,TMEM82,HHIPL2,CAPNS2,STK32B,SLC22A7,ACMSD,CLIC4,PROM2,NAT8,ABCC6P2,LOC151534,SYPL2,FLJ45079,SLC28A1,LGALS2,NIT2,PLA2G12B,MTCH2,UGT2A3,ZIC2,ZNF750,ACSM2B,LYG1,C14orf73,LPAR3,TMEM200A,TFAP2A…	ORGANIC_ANION_TRANSPORT	0.468386	0.0199153
M8	KIRP	3	1467	M3	ACY3,GLYAT,PKLR,AGXT2,KHK,LRP2,ACSM2A,ANKS4B,AMN,TRIM10,SLC39A5,AGMAT,PDZD3,AIFM1,SLC7A9,FMO1,ASRGL1,DAO,TMEM27,CLRN3,FLJ45983,PDZK1,CUBN,KCNK12,PEPD,DDC,SPATA18,HGD,GRHL2,HAO2,RDH5,FAM171B,ASPDH,TMEM82,HHIPL2,CAPNS2,STK32B,SLC22A7,ACMSD,CLIC4,PROM2,NAT8,ABCC6P2,LOC151534,SYPL2,SLC28A1,LGALS2,NIT2,PLA2G12B,MTCH2,UGT2A3,ZIC2,ZNF750,ACSM2B,LYG1,C14orf73,TMEM200A,TFAP2A,MYL3,SLC22A11,GBA3,GPD1,PIPOX…	ORGANIC_ANION_TRANSPORT	0.468386	0.0199153
M679	KIRP	4	31	M171	ATP5D	NA	0.461117	0.0199538
M660	KIRP	4	20	M151		NA	0.474214	0.0199881
M500	KIRP	5	32	M80	PKD2L1,OTOA	NA	0.473651	0.0200602
M371	KIRP	3	17	M63	RAN	POSITIVE_REGULATION_OF_TRANSCRIPTION_OF_NUCLEOLAR_LARGE_RRNA_BY_RNA_POLYMERASE_I	2.12417	0.0207645
M967	KIRP	4	21	M349	EPN2	NA	0.480124	0.022005
M341	KIRP	3	15	M55	C1orf43	NA	2.14037	0.0220775
M222	KIRP	3	27	M25	PHF3	CELL_CYCLE_DNA_REPLICATION	2.1043	0.0224961
M582	KIRP	4	10	M109	TTC35	NA	2.10002	0.0228581
M331	KIRP	3	28	M53	ALDH6A1	CELLULAR_AMINO_ACID_CATABOLIC_PROCESS	0.479494	0.0239882
M1198	KIRP	6	18	M557	LPAR3	NA	2.03462	0.0239996
M1406	KIRP	6	19	M1124	ZMYND10,LRRC50	NA	0.479513	0.0240216
M1475	KIRP	7	27	M1377	KCNJ16	NA	0.492523	0.0240701
M219	KIRP	3	22	M25	PRPF40A,MARCH7,UBXN4	REGULATION_OF_T_CELL_ACTIVATION	2.05463	0.0248169
M948	KIRP	4	12	M325	DLD	BRANCHED_CHAIN_AMINO_ACID_CATABOLIC_PROCESS	0.482581	0.0256747
M1013	KIRP	5	23	M395	TSNAXIP1,WDR90	INTRACILIARY_TRANSPORT	0.484902	0.0262816
M619	KIRP	4	26	M129	MTDH,KIAA1429	IMP_BIOSYNTHETIC_PROCESS	2.01751	0.0266162
M199	KIRP	3	28	M21	LSM2	NA	2.05527	0.0271657
M1117	KIRP	5	109	M462	CREB5,LRRN4,COBL,LRRK2,ITGB8	THYROID_HORMONE_GENERATION	0.493049	0.0273128
M325	KIRP	3	19	M52	DLD	TRICARBOXYLIC_ACID_CYCLE	0.489974	0.0285962
M63	KIRP	2	109	M4	RAN,CCT3,STRAP,TMED2	RNA_DEPENDENT_DNA_BIOSYNTHETIC_PROCESS	2.01304	0.0289936
M349	KIRP	3	79	M57	EPN2,CNTROB,KCTD11,SMG6	NA	0.496891	0.0291099
M295	KIRP	3	15	M45		NA	2.03036	0.0296654
M678	KIRP	4	106	M171	NDUFB7,NDUFS7,NDUFS8	CELLULAR_RESPIRATION	0.498416	0.0299565
M264	KIRP	3	34	M35	COPB2,MRPL3	PROTEIN_ADP_RIBOSYLATION	2.02651	0.0302414
M48	KIRP	2	141	M4	YIPF6,ATF6,CDC73,IARS2,ACBD3,HSPA8	RESPONSE_TO_TOPOLOGICALLY_INCORRECT_PROTEIN	1.99976	0.0305677
M23	KIRP	2	150	M4	AKR1B10,ABCC2,TXNRD1,TALDO1,CMBL,UGT1A9,EPHX1,SLC7A11,GCLM	FLAVONOID_METABOLIC_PROCESS	2.01963	0.0312418
M1394	KIRP	6	43	M1117	CREB5	THYROID_HORMONE_GENERATION	0.502836	0.0319512
M1069	KIRP	5	44	M438	FLJ45244	SULFUR_COMPOUND_BIOSYNTHETIC_PROCESS	0.49763	0.032323
M178	KIRP	3	27	M17	SNRPG,SF3B14	NA	2.00765	0.0324682
M146	KIRP	3	17	M12	KIAA1715	NEGATIVE_REGULATION_OF_APOPTOTIC_SIGNALING_PATHWAY	1.96797	0.0324746
M336	KIRP	3	13	M54	NOP58	NA	1.98189	0.0326337
M361	KIRP	3	27	M60	NAGLU,VAT1	UDP_N_ACETYLGLUCOSAMINE_BIOSYNTHETIC_PROCESS	0.509225	0.0336693
M446	KIRP	4	59	M71	UBXN11	NA	0.507686	0.034275
M57	KIRP	2	102	M4	EPN2,CNTROB,KCTD11,SMG6,FAM109B	NA	0.508043	0.0344741
M1248	KIRP	5	86	M678	NDUFB7,NDUFS8,MRPL41	CELLULAR_RESPIRATION	0.510325	0.0359426
M210	KIRP	3	75	M23	AKR1B10,TALDO1,EPHX1,TXNRD1,GCLM	PENTOSE_PHOSPHATE_SHUNT	1.97739	0.0369979
M132	KIRP	3	10	M11	CYCS,NDUFA5	NA	0.505612	0.0370786
M1182	KIRP	6	16	M536	ASRGL1	NA	0.506303	0.0371893
M80	KIRP	4	111	M6	CD300LF,PKD2L1,DPEP2,OTOA,SLC15A3	LEUKOCYTE_MEDIATED_CYTOTOXICITY	0.517628	0.0375823
M918	KIRP	4	10	M293	SOX6,PRKAA2	NA	0.518075	0.0379189
M896	KIRP	4	82	M280	CASP8AP2,TPR,ARID4B	NA	1.94457	0.0380849
M47	KIRP	2	114	M4	ANKS3,SPSB3,CDK10,RHOT2,INO80E,C16orf48	NA	0.514042	0.0381585
M1113	KIRP	5	67	M462	AK7,DNAL1,GNAI1	NEGATIVE_REGULATION_OF_T_CELL_APOPTOTIC_PROCESS	0.513479	0.0382192
M1203	KIRP	5	35	M569	COX7A2,HDDC2	OXIDATIVE_PHOSPHORYLATION	0.515365	0.0383706
M823	KIRP	4	20	M238	SLK	NA	0.516185	0.039135
M781	KIRP	4	23	M222	PHF3	CELL_CYCLE_DNA_REPLICATION	1.93646	0.0392132
M1123	KIRP	5	16	M463	TTC25	NA	0.521141	0.0392504
M287	KIRP	3	49	M45	UQCRFS1	ELECTRON_TRANSPORT_CHAIN	0.522238	0.0397135
M465	KIRP	4	18	M73	CXCL1,CXCL6,CXCL5	ANTIMICROBIAL_HUMORAL_IMMUNE_RESPONSE_MEDIATED_BY_ANTIMICROBIAL_PEPTIDE	0.521172	0.0399647
M1238	KIRP	5	15	M660	FNDC3A	NA	0.522679	0.0401213
M770	KIRP	4	10	M216	CDHR3,LOC388387,URGCP	NA	0.517954	0.0403171
M346	KIRP	3	37	M56	ZNF211,ZNF419	NA	0.523008	0.0403328
M642	KIRP	4	35	M147	ATE1,SEC23IP,KIAA0196	NA	1.92944	0.0407747
M550	KIRP	5	23	M95	CLIC4	ORGANIC_HYDROXY_COMPOUND_CATABOLIC_PROCESS	0.519865	0.0409569
M134	KIRP	3	16	M11		ATF6_MEDIATED_UNFOLDED_PROTEIN_RESPONSE	1.90652	0.0410327
M900	KIRP	4	20	M281	ZNF644	NA	1.90796	0.0420206
M1250	KIRP	5	17	M679	ATP5D	NA	0.515199	0.0421361
M790	KIRP	4	27	M228	PSMB4	NA	1.91623	0.042348
M119	KIRP	3	55	M11	LEPROT,RRAGC	NA	0.526676	0.0425215
M784	KIRP	4	13	M227	MXD3	NA	1.88275	0.0433229
M1125	KIRP	5	19	M463	RTDR1	NA	1.9086	0.0436311
M1193	KIRP	6	21	M548	FLJ45983,GATA3	SODIUM_ION_HOMEOSTASIS	1.89033	0.0443952
M566	KIRP	5	10	M103	JAM3,MSRB3	NA	1.88288	0.0451025
M136	KIRP	3	20	M11	DCTN6	LATE_ENDOSOME_TO_VACUOLE_TRANSPORT	1.89724	0.0454209
M471	KIRP	4	13	M73	C1orf172	NA	0.53631	0.0469695
M1179	KIRP	6	40	M534	AIFM1,MTCH2	COFACTOR_METABOLIC_PROCESS	0.534197	0.0473238
M171	KIRP	3	176	M17	NDUFB7,ATP5D,NDUFS7,NDUFS8,MRPL41,ENDOG	OXIDATIVE_PHOSPHORYLATION	0.529373	0.047519
M1448	KIRP	6	11	M1240	ACTR2	ASYMMETRIC_CELL_DIVISION	1.86	0.0475375
M385	KIRP	3	32	M67	TUBA3C	NA	1.88396	0.047823
M1004	KIRP	5	26	M391	FNBP4	POSITIVE_REGULATION_OF_PROTEIN_DEACETYLATION	1.87215	0.047964
M1454	KIRP	6	34	M1264	RPL18	PROTEIN_LOCALIZATION_TO_ENDOPLASMIC_RETICULUM	1.8846	0.0481523
M1333	KIRP	5	62	M896	CASP8AP2,ARID4B,TPR,ZNF292	NA	1.87666	0.0482626
M709	KIRP	4	64	M187	RPL28,RPL18,RPS15,RPS19	COTRANSLATIONAL_PROTEIN_TARGETING_TO_MEMBRANE	1.88158	0.0487537
M227	KIRP	3	85	M27	KRTCAP2,DPM3,SNRPA,MXD3	NA	1.87572	0.0495288
M1166	KIRP	6	49	M510	FLI1	NEGATIVE_REGULATION_OF_INTERLEUKIN_6_PRODUCTION	1.84664	0.0496853
M312	KIRP	3	20	M49	RPS12	COTRANSLATIONAL_PROTEIN_TARGETING_TO_MEMBRANE	1.85703	0.0498611
M582	LGG	5	181	M168	AK2,GNG5,BCL2L12,VIM,TXNDC12,ACSL6,RHOC,SLC39A1,C1orf144,SHKBP1	NA	2.75594	1.10259e-10
M581	LGG	5	22	M168	GNG12	NA	0.371228	1.45664e-10
M363	LGG	4	21	M63	PQLC2	RESPONSE_TO_UV	2.70953	2.02894e-10
M308	LGG	4	17	M56	CAMLG,NCRNA00219	NA	0.377237	3.40472e-10
M1091	LGG	6	35	M582	BCL2L12	NA	2.62738	6.22271e-10
M946	LGG	5	17	M412	MRPL43,POLL,DNAJB12	NA	0.400562	2.54951e-09
M1089	LGG	6	65	M582	GNG5,RHOC,SLC39A1,VIM	NA	2.48728	3.27712e-09
M216	LGG	4	766	M28	STXBP1,STX1B,SYP,RUNDC3A,PPP3CB,BSN,JPH3,SNAP91,PSD,RAB3A,ATP6V1G2,DLG4,FAM126B,PAK7,DSCAML1,SYNGR1,GHITM,SHISA7,ATCAY,JPH4,GABRB3,MOAP1,FBXL16,EFHA2,KIF3C,DUSP26,PPFIA3,CBLN1,CPEB3,NAP1L3,DLGAP3,ELFN2,H2AFY2,BZRAP1,NCAM1,PPP1R3F,NLGN3,PDIA4,PTPRZ1,MAPRE3,PDXP,TSPYL1,DNM3,KDELR2,SLC9A6,DNAJC12,TOLLIP,ASB13,HMX1,VAMP2,WSCD1	REGULATION_OF_TRANS_SYNAPTIC_SIGNALING	0.395819	3.35869e-09
M1470	LGG	7	55	M1241	SNAP91,GABRB3,PAK7	REGULATION_OF_POSTSYNAPTIC_MEMBRANE_POTENTIAL	0.399246	3.70865e-09
M210	LGG	4	53	M27	GDAP1L1,ZDHHC22	NA	0.411359	4.33724e-09
M159	LGG	4	44	M23	CDCA8,KIF2C	CENTRIOLE_ASSEMBLY	2.41454	8.73063e-09
M1529	LGG	8	34	M1419	GNG5	NA	2.38359	1.53358e-08
M698	LGG	5	11	M210	ZDHHC22	NA	0.425742	1.55242e-08
M1419	LGG	7	47	M1089	GNG5,TXNDC12	NA	2.37479	1.57018e-08
M24	LGG	3	2268	M3	AK2,GNAI3,ZNF644,RSPH1,LSM10,WDR78,DOCK7,SLC30A7,GNG5,MRPS15,PRPF31,SEP15,STOML3,ZCCHC11,CSDE1,FAM183A,HMGCL,BCL2L12,KPNA6,C1orf88,WDR38,SF3A3,CCDC135,C10orf79,PKN2,HBXIP,TXNDC12,SNRNP40,ZMYM1,LRRC48,SPEF1,PEF1,NADK,MFN2,ZZZ3,RSPH4A,DRG2,MRPL20,RPF1,USP33,SSU72,SFRS11,SH3GLB1,GPBP1L1,TMEM67,C6orf103,AP2S1,TXLNA,SPAG1,FNDC3B,NPHP1,GLIS3,CDC42,IRF3,RTCD1,UBXN11,AGTRAP,C1orf192,TMEM167B,FAH,LOC10028…	CILIUM_ORGANIZATION	2.38957	1.62135e-08
M1087	LGG	6	11	M581	GNG12	NA	2.35964	1.65003e-08
M1241	LGG	6	75	M706	SNAP91,PAK7,GABRB3	REGULATION_OF_POSTSYNAPTIC_MEMBRANE_POTENTIAL	0.416807	1.68631e-08
M3	LGG	2	3275	M1	AK2,GNAI3,ZNF644,ESAM,COL4A2,RSPH1,LSM10,SLC30A7,WDR78,TPX2,DOCK7,GNG5,MRPS15,PRPF31,SEP15,STOML3,ZCCHC11,CSDE1,FAM183A,HMGCL,BCL2L12,KPNA6,C1orf88,WDR38,COL4A1,NCAPH,SF3A3,CCDC135,C10orf79,PKN2,HBXIP,FNDC3B,TXNDC12,SNRNP40,ZMYM1,LRRC48,SPEF1,KIFC1,PEF1,NADK,MFN2,ELTD1,ZZZ3,CDH5,RSPH4A,LAMC1,DRG2,ASF1B,MRPL20,RPF1,LMNB1,USP33,SSU72,SFRS11,SH3GLB1,COL1A2,ABCB1,GPBP1L1,TMEM67,C6orf103,RNASEH2A,CDCA…	ORGANELLE_FISSION	2.37506	1.69115e-08
M563	LGG	5	40	M159	CDCA8,KIF2C	CENTRIOLE_ASSEMBLY	2.35881	1.81556e-08
M106	LGG	4	19	M9	HOXD11	REGIONALIZATION	2.33669	3.83631e-08
M590	LGG	5	101	M168	SLC30A7,SH3GLB1,FNDC3B,SERP2,TXLNA,EML4	POLYSACCHARIDE_METABOLIC_PROCESS	2.34636	3.89178e-08
M192	LGG	4	45	M26	NAP1L2	SNRNA_3_END_PROCESSING	0.431437	3.90617e-08
M1130	LGG	6	43	M599	WDR78,RSPH4A	AXONEME_ASSEMBLY	2.30034	4.37268e-08
M626	LGG	5	47	M177	SYN1	REGULATION_OF_CALCIUM_ION_DEPENDENT_EXOCYTOSIS	0.433739	5.08858e-08
M1462	LGG	7	16	M1195	CHRNB2	REGULATION_OF_NEURON_PROJECTION_DEVELOPMENT	0.435394	5.42449e-08
M509	LGG	5	38	M128	MSN,MYL12A	NA	2.2777	5.55126e-08
M1195	LGG	6	23	M637	CHRNB2,UNC13A	NA	0.439061	6.76421e-08
M1461	LGG	7	12	M1194	KCNK3	NA	0.441822	7.9019e-08
M1191	LGG	6	62	M636	SVOP,L1CAM	NA	0.440033	8.12615e-08
M28	LGG	3	870	M4	STXBP1,STX1B,SYP,RUNDC3A,PPP3CB,BSN,JPH3,ALDH2,SNAP91,PSD,NDRG2,RAB3A,ATP6V1G2,DLG4,FAM126B,PAK7,DSCAML1,SYNGR1,GHITM,SHISA7,ATCAY,JPH4,GABRB3,MOAP1,FBXL16,EFHA2,KIF3C,DUSP26,ALDOC,PPFIA3,CBLN1,CPEB3,NAP1L3,HRSP12,DLGAP3,ELFN2,H2AFY2,BZRAP1,NCAM1,PPP1R3F,GABBR1,MRO,NCRNA00093,NLGN3,PDIA4,PTPRZ1,SLC25A18,MAPRE3,PDXP,TSPYL1,DNM3,KDELR2,SLC9A6,ENHO,DNAJC12,TOLLIP,ASB13,HMX1,VAMP2,WSCD1	REGULATION_OF_TRANS_SYNAPTIC_SIGNALING	0.441768	8.16542e-08
M1389	LGG	7	11	M1063	RER1	NA	2.26872	8.96538e-08
M1430	LGG	7	11	M1105	2022-09-15	NA	2.25568	9.26785e-08
M1249	LGG	6	127	M708	RUNDC3A,JPH3,JPH4,DUSP26,PSD,ASB13	REGULATION_OF_MEMBRANE_POTENTIAL	0.444352	1.05156e-07
M1114	LGG	6	17	M590	FNDC3B	NA	2.25816	1.17208e-07
M443	LGG	4	18	M82	ZFYVE20,CLASP2	NA	0.446346	1.31442e-07
M128	LGG	4	77	M16	MSN,PDPN,CD58	NA	2.22416	1.3206e-07
M1131	LGG	6	27	M599	C1orf88	CILIUM_ORGANIZATION	2.20728	1.39101e-07
M688	LGG	5	22	M202	PHYHIPL,TUB	NA	0.450641	1.42061e-07
M594	LGG	5	25	M168	LEPRE1,TMEM8A	NA	2.24643	1.42389e-07
M708	LGG	5	333	M216	STX1B,RUNDC3A,JPH3,ATP6V1G2,PSD,DSCAML1,SHISA7,SYP,ATCAY,JPH4,DUSP26,PPFIA3,CPEB3,NAP1L3,ELFN2,BZRAP1,PDIA4	REGULATION_OF_TRANS_SYNAPTIC_SIGNALING	0.449704	1.61865e-07
M82	LGG	3	95	M6	SOX6,FERMT1,FCHSD2,BMP2,TCF12,ZFYVE20	REGULATION_OF_MUSCLE_ORGAN_DEVELOPMENT	0.454675	1.68217e-07
M1429	LGG	7	14	M1103	KIAA0467,ZCCHC11	NA	2.2118	2.22075e-07
M637	LGG	5	62	M180	CHGB,CHRNB2,KCNK3	NA	0.456836	2.34082e-07
M1482	LGG	7	62	M1249	RUNDC3A,PSD	REGULATION_OF_MEMBRANE_POTENTIAL	0.455823	2.51239e-07
M1075	LGG	6	35	M577	NASP,HAUS5	TRANSCRIPTION_COUPLED_NUCLEOTIDE_EXCISION_REPAIR	2.19532	3.03971e-07
M992	LGG	5	15	M442	BMP2	CELL_SURFACE_RECEPTOR_SIGNALING_PATHWAY_INVOLVED_IN_HEART_DEVELOPMENT	0.463778	3.27647e-07
M180	LGG	4	188	M26	FAM123C,SVOP,CHGB,CHRNB2,XKR7,MARCH4,L1CAM,CACNG2,KCNK3,ACTL6B	REGULATION_OF_MEMBRANE_POTENTIAL	0.464009	3.76414e-07
M442	LGG	4	33	M82	FERMT1,BMP2	CELL_SURFACE_RECEPTOR_SIGNALING_PATHWAY_INVOLVED_IN_HEART_DEVELOPMENT	0.466462	4.02634e-07
M1194	LGG	6	32	M637	CHGB,KCNK3,CACNG2,KIAA1409	DERMATAN_SULFATE_BIOSYNTHETIC_PROCESS	0.464669	4.10009e-07
M1500	LGG	7	14	M1254	KDELR2,PDIA4	NA	2.13363	4.21571e-07
M168	LGG	4	1159	M24	AK2,GNAI3,ZNF644,SLC30A7,GNG5,SEP15,DOCK7,ZCCHC11,CSDE1,BCL2L12,KPNA6,SF3A3,PKN2,TXNDC12,ZMYM1,NADK,SNRNP40,MFN2,ZZZ3,DRG2,USP33,SFRS11,SH3GLB1,GPBP1L1,TXLNA,FNDC3B,CDC42,RTCD1,RPF1,TMEM167B,VIM,ZMYM4,HS2ST1,RAP1A,NRD1,GNL2,FOXJ3,C1orf144,CAP1,ACSL6,LEPRE1,TTC30B,MIER1,WDR47,HP1BP3,ASAP3,HIPK1,GNG12,LRRC41,DNAJC16,RHOC,SERP2,SLC39A1,GLIS3,KIAA0494,KIF1B,NECAP2,RSBN1,FPGT,PPP1R8,CNN3,NRAS,GLT25D1,…	NUCLEOSOME_ORGANIZATION	2.16535	4.3529e-07
M592	LGG	5	32	M168	RTCD1,PHTF1	NA	2.14858	4.41703e-07
M1090	LGG	6	50	M582	AK2,C1orf144	NA	2.14831	4.63906e-07
M1066	LGG	6	51	M576	HMGCL,AGTRAP,SERTAD3	GLUTATHIONE_DERIVATIVE_BIOSYNTHETIC_PROCESS	2.14777	5.31016e-07
M1076	LGG	6	61	M578	SF3A3,LRRC41,NADK,SNRNP40	NA	2.1464	5.5631e-07
M1106	LGG	6	23	M588	RAP1A,VAMP3	VESICLE_DOCKING	2.1238	5.57148e-07
M412	LGG	4	52	M75	CUEDC2,MRPL43	MITOCHONDRIAL_TRANSLATIONAL_TERMINATION	0.471453	6.0544e-07
M1494	LGG	7	26	M1253	ATP6V1G2,DNAJC12,NAP1L3	PROGESTERONE_METABOLIC_PROCESS	0.473008	6.2599e-07
M104	LGG	4	28	M9	HOXA5	PATTERN_SPECIFICATION_PROCESS	2.13069	6.94018e-07
M144	LGG	4	52	M20	ZNF821,CAST,IQGAP1	NA	2.08387	8.09684e-07
M636	LGG	5	85	M180	SVOP,FAM123C,L1CAM	SIGNAL_RELEASE	0.474701	8.29841e-07
M1113	LGG	6	23	M590	SH3GLB1	POLYSACCHARIDE_METABOLIC_PROCESS	2.1003	9.04758e-07
M1177	LGG	6	41	M626	SYN1	REGULATION_OF_CALCIUM_ION_DEPENDENT_EXOCYTOSIS	0.475166	9.21788e-07
M1112	LGG	6	33	M590	SLC30A7	NA	2.0987	1.01734e-06
M578	LGG	5	71	M168	SF3A3,LRRC41,NADK,SNRNP40	NA	2.10793	1.01989e-06
M362	LGG	4	31	M63	UBE2J2,C1orf86,RBM42	UBIQUITIN_DEPENDENT_ERAD_PATHWAY	2.0929	1.08279e-06
M813	LGG	5	10	M301	HSF2	NA	0.480167	1.11588e-06
M1460	LGG	7	17	M1194	CACNG2,CHGB,KIAA1409	DERMATAN_SULFATE_BIOSYNTHETIC_PROCESS	0.480132	1.12292e-06
M75	LGG	3	66	M6	CUEDC2,MRPL43	NA	0.481257	1.12678e-06
M1484	LGG	7	12	M1249	JPH4	NA	0.48056	1.1382e-06
M870	LGG	5	31	M347	NDUFV1	NADH_DEHYDROGENASE_COMPLEX_ASSEMBLY	0.479729	1.18204e-06
M1415	LGG	7	26	M1075	NASP,HAUS5	RNA_SPLICING	2.07962	1.35254e-06
M1342	LGG	6	23	M870	NDUFV1,C11orf68	NADH_DEHYDROGENASE_COMPLEX_ASSEMBLY	0.482376	1.3657e-06
M1247	LGG	6	10	M707	SERINC1	NA	0.480864	1.44806e-06
M1103	LGG	6	26	M587	ZCCHC11,KIAA0467	NA	2.09599	1.46716e-06
M1433	LGG	7	11	M1106	ATG4C,PTP4A2	NA	2.06484	1.60792e-06
M1254	LGG	6	37	M708	PDIA4,KDELR2,CPEB3	GLYCOPROTEIN_BIOSYNTHETIC_PROCESS	2.0629	1.66275e-06
M674	LGG	5	16	M195	SSX2IP	MEMBRANE_REPOLARIZATION_DURING_ACTION_POTENTIAL	2.0557	1.75516e-06
M1485	LGG	7	14	M1249	DUSP26,STARD10	NA	0.488598	1.77034e-06
M1136	LGG	6	30	M599	TMEM67	CILIUM_ORGANIZATION	2.04782	1.83039e-06
M706	LGG	5	103	M216	SNAP91,PAK7,GABRB3,CBLN1,H2AFY2	REGULATION_OF_POSTSYNAPTIC_MEMBRANE_POTENTIAL	0.490335	2.10721e-06
M587	LGG	5	56	M168	ZCCHC11,SFRS11	NA	2.05778	2.23384e-06
M1121	LGG	6	13	M593	HIST2H2BE	CHROMATIN_ASSEMBLY	2.07057	2.43786e-06
M695	LGG	5	46	M209	SOX8	GLIAL_CELL_FATE_COMMITMENT	0.495724	2.58159e-06
M414	LGG	4	39	M76	WAC,RAB18	NA	0.492374	2.63748e-06
M16	LGG	3	333	M2	EMP3,TIMP1,MSN,TAGLN2,PDPN,C1R,LOC541471,SERPING1,CD58,EVC2,MYL12A,IGFBP2,C1RL,CHI3L1,NCRNA00152,FSTL1,CLIC1,GPX8,ACTN1,VASN	EXTRACELLULAR_STRUCTURE_ORGANIZATION	2.02646	2.73704e-06
M36	LGG	3	66	M5	SNRNP70,ZNF814,DMPK,LOC100128842	NA	2.05572	2.78794e-06
M68	LGG	3	51	M6	ATP5G2,SUCLG1,DIABLO,TXN2	TELOMERE_ORGANIZATION	0.495291	2.93846e-06
M1105	LGG	6	48	M588	SEP15,CDC42,CAP1	NEGATIVE_REGULATION_OF_SUPRAMOLECULAR_FIBER_ORGANIZATION	2.01373	3.06633e-06
M202	LGG	4	62	M26	GALNT13,CSMD3,PHYHIPL,TUB	POSITIVE_REGULATION_OF_GONAD_DEVELOPMENT	0.496219	3.08321e-06
M1483	LGG	7	18	M1249	JPH3	EXPLORATION_BEHAVIOR	0.49691	3.30933e-06
M42	LGG	3	93	M5	CCNL2,SNHG12,ARHGEF1,OVGP1,AMY2B	FIBRINOLYSIS	2.02846	3.81365e-06
M1092	LGG	6	10	M582	DDOST,ABCC8,KCNJ11	NA	0.495927	3.81774e-06
M111	LGG	4	91	M11	SP100,CASP8,CASP4,TRIM38	DEFENSE_RESPONSE_TO_VIRUS	2.00592	3.87654e-06
[truncated: 2,751 more rows]
