# Supplementary material for: Multiscale network modeling reveals the gene regulatory landscape driving cancer prognosis in 32 cancer types
Source: Genome Res. 2023 Oct;33(10):1806–17. doi: 10.1101/gr.278063.123 (PMC10691533; doi:10.1101/gr.278063.123)
Supplement: Supplement 11 [file Supplemental_Table_S5.xlsx]

## Sheet: Supplemental_Table_S5
Supplemental Table S5. The cytobands enriched for prognostic modules
Cytoband	Module	Cancer	Size	Layer	Hazard_ratio	Survival_p	GeneRatio	BgRatio	pvalue	p.adjust
12q13.13	M80	ACC	13	3	5.24061	0.000899314	4/60	13/17275	9.18208e-08	9.09026e-06
12q13.13	M8	BRCA	350	3	0.681018	0.0275384	17/76	350/17355	1.33111e-13	3.77147e-12
12q13.13	M153	COAD	10	4	1.89034	0.00973388	6/40	10/8687	1.33472e-12	5.20539e-11
12q13.13	M34	GBM	27	3	1.62703	0.0127642	9/65	27/17622	3.15737e-16	2.84163e-14
12q13.13	M317	GBM	14	4	1.46991	0.0485588	6/65	14/17622	5.83328e-12	2.62497e-10
12q13.13	M215	KIRC	90	5	2.57051	8.46475e-09	5/72	90/17735	3.22011e-05	0.00107337
12q13.13	M456	KIRC	31	4	2.14985	1.84648e-06	4/72	31/17735	7.23095e-06	0.000687455
12q13.13	M422	KIRC	116	4	1.81829	0.000140927	4/72	116/17735	0.00126921	0.0253842
12q13.13	M1013	KIRC	64	5	1.64142	0.00147134	4/72	64/17735	0.000131983	0.00329958
12q13.13	M9	LGG	73	3	2.00119	4.04219e-06	9/67	73/17935	6.52178e-12	2.80437e-10
12q13.13	M129	LGG	108	4	1.96447	7.12211e-06	4/67	108/17935	0.00071203	0.0153086
12q13.13	M105	LGG	17	4	1.72232	0.000274103	9/67	17/17935	1.92304e-18	1.65382e-16
12q13.13	M685	LIHC	14	5	1.53927	0.0184711	6/63	14/17072	5.80448e-12	5.22403e-10
12q13.13	M209	LUAD	185	4	1.7263	0.000710443	11/70	185/17625	1.59745e-10	2.30033e-09
12q13.13	M584	LUAD	78	5	1.59015	0.00382368	6/70	78/17625	6.46865e-07	5.82179e-06
12q13.13	M1172	LUAD	12	6	1.42153	0.0277973	9/70	12/17625	3.14037e-20	2.26107e-18
12q13.13	M60	MESO	80	2	1.92023	0.0103556	5/76	80/17899	2.26523e-05	0.000845687
12q13.13	M16	MESO	37	2	1.67311	0.0455203	7/76	37/17899	1.74356e-10	1.95279e-08
12q13.13	M1398	OV	16	7	0.687972	0.0142089	5/76	16/18231	4.64195e-09	7.79848e-08
12q13.13	M772	OV	60	6	0.707025	0.0227875	13/76	60/18231	1.72598e-19	7.2491e-18
12q13.13	M487	OV	112	5	0.726366	0.0354805	17/76	112/18231	2.02529e-22	1.70125e-20
12q13.13	M43	OV	27	4	1.35915	0.0435166	6/76	27/18231	1.18509e-09	2.4887e-08
12q13.13	M131	PAAD	44	5	1.76262	0.00860858	7/74	44/17926	5.18207e-10	2.35784e-08
12q13.13	M17	PAAD	99	4	1.74413	0.0091889	8/74	99/17926	7.24994e-09	2.19915e-07
12q13.13	M508	SARC	132	4	0.476964	0.000605409	4/75	132/17085	0.00270878	0.0155139
12q13.13	M106	SARC	470	3	0.580604	0.010126	7/75	470/17085	0.00451995	0.0219044
12q13.13	M1189	TGCT	30	5	2.50769	0.0150254	4/74	30/18167	6.41437e-06	0.000113321
12q13.13	M631	TGCT	66	4	2.44784	0.0178776	4/74	66/18167	0.000151005	0.00145514
12q13.13	M308	TGCT	103	3	2.43103	0.0190051	4/74	103/18167	0.000826992	0.00730509
12q13.13	M1187	TGCT	57	5	2.26725	0.0257621	5/74	57/18167	3.47097e-06	7.35846e-05
12q13.13	M162	TGCT	201	3	2.15162	0.036809	13/74	201/18167	1.46007e-12	1.54767e-10
12q13.13	M171	THYM	443	3	3.77799	0.00965204	10/73	443/17619	1.37599e-05	0.000297213
12q13.13	M696	THYM	28	4	3.72038	0.0105026	4/73	28/17619	5.14963e-06	0.00013904
12q13.13	M1231	THYM	13	5	2.54649	0.0452929	4/73	13/17619	1.88485e-07	2.03564e-05
12q13.13	M89	UCEC	49	5	1.71103	0.0193238	6/53	49/15665	1.40155e-08	4.04262e-07
12q13.13	M10	UCEC	315	4	1.69536	0.0194404	8/53	315/15665	9.86735e-06	0.000202281
12q13.13	M431	UCEC	24	6	1.56531	0.0460862	5/53	24/15665	1.47901e-08	4.04262e-07
12q13.13	M48	UVM	36	2	2.86871	0.0459457	7/57	36/16266	3.41892e-11	2.80352e-09
16p13.3	M84	ACC	63	3	0.154277	0.000231717	7/151	63/17275	1.24543e-06	3.71553e-05
16p13.3	M881	ACC	29	4	4.38123	0.00154477	4/151	29/17275	0.000112386	0.00143693
16p13.3	M437	ACC	48	4	0.246056	0.00186646	7/151	48/17275	1.84918e-07	6.62007e-06
16p13.3	M1599	ACC	16	5	0.275999	0.00578484	4/151	16/17275	9.40819e-06	0.000187118
16p13.3	M124	ACC	81	3	3.24713	0.00585046	4/151	81/17275	0.00554341	0.0396908
16p13.3	M179	ACC	57	3	0.298346	0.00666304	4/151	57/17275	0.00154649	0.015379
16p13.3	M1115	ACC	28	5	0.303134	0.00727237	7/151	28/17275	3.44172e-09	1.54017e-07
16p13.3	M171	ACC	35	3	0.378068	0.0198292	4/151	35/17275	0.000237873	0.00283861
16p13.3	M1307	ACC	83	5	0.433357	0.0419297	14/151	83/17275	1.2991e-14	7.75127e-13
16p13.3	M638	ACC	147	4	0.433357	0.0419297	22/151	147/17275	3.4905e-21	6.248e-19
16p13.3	M209	BLCA	63	3	0.666101	0.00881153	24/144	63/17609	1.29309e-34	5.09816e-33
16p13.3	M904	BRCA	45	4	0.66331	0.0197011	4/154	45/17355	0.000669419	0.00414203
16p13.3	M1433	BRCA	35	5	0.668175	0.0220405	4/154	35/17355	0.000251998	0.00166319
16p13.3	M1586	BRCA	11	6	0.675286	0.026768	4/154	11/17355	1.87463e-06	1.54657e-05
16p13.3	M452	CESC	30	3	0.46172	0.00440232	20/148	30/17329	3.14645e-35	1.13272e-33
16p13.3	M268	CESC	44	3	2.00989	0.00904247	4/148	44/17329	0.000531789	0.0047861
16p13.3	M23	CESC	133	2	0.551399	0.0244056	5/148	133/17329	0.00569327	0.0409915
16p13.3	M33	CESC	118	2	0.574176	0.0351036	59/148	118/17329	2.52026e-94	2.72188e-92
16p13.3	M285	CHOL	51	3	3.47486	0.0186945	18/152	51/17619	5.4469e-25	1.01857e-22
16p13.3	M929	CHOL	37	4	3.47486	0.0186945	14/152	37/17619	3.53772e-20	3.30777e-18
16p13.3	M464	COAD	127	6	1.83745	0.0150487	4/42	127/8687	0.00317379	0.0345739
16p13.3	M656	COAD	108	7	1.70403	0.0317377	4/42	108/8687	0.00175841	0.030479
16p13.3	M260	HNSC	19	4	0.662532	0.00348822	11/150	19/17201	1.08838e-18	3.40118e-17
16p13.3	M750	HNSC	16	5	0.678152	0.00565081	4/150	16/17201	9.31954e-06	0.000116494
16p13.3	M613	HNSC	13	5	0.687429	0.00729847	7/150	13/17201	5.4712e-12	1.3678e-10
16p13.3	M35	HNSC	36	3	0.696399	0.01006	18/150	36/17201	2.36042e-28	9.83508e-27
16p13.3	M533	HNSC	39	5	1.34358	0.033825	26/150	39/17201	2.15341e-45	1.34588e-43
16p13.3	M337	KICH	139	4	0.0947077	0.0269945	8/145	139/17284	2.25577e-05	0.000233633
16p13.3	M1048	KICH	58	5	0.104412	0.0333946	14/145	58/17284	3.33672e-17	4.83824e-15
16p13.3	M1558	KICH	44	6	0.104412	0.0333946	10/145	44/17284	2.4544e-12	1.77944e-10
16p13.3	M1742	KICH	33	7	0.104412	0.0333946	9/145	33/17284	5.20646e-12	2.51646e-10
16p13.3	M1559	KICH	11	6	0.106638	0.0350722	4/145	11/17284	1.49812e-06	1.81023e-05
16p13.3	M387	KICH	39	4	0.107121	0.0354695	9/145	39/17284	2.74138e-11	9.93751e-10
16p13.3	M56	KICH	126	3	0.108934	0.0367853	12/145	126/17284	6.59524e-10	1.59385e-08
16p13.3	M432	KIRC	137	4	2.25876	4.58864e-07	8/148	137/17735	1.96232e-05	0.000359758
16p13.3	M1041	KIRC	70	5	2.11546	2.86599e-06	7/148	70/17735	1.88811e-06	3.89422e-05
16p13.3	M837	KIRC	51	5	1.79452	0.000205716	11/148	51/17735	3.35774e-13	2.77013e-11
16p13.3	M938	KIRC	79	5	1.76703	0.000316076	4/148	79/17735	0.00431009	0.0445673
16p13.3	M308	KIRC	168	4	1.68672	0.000942026	11/148	168/17735	1.65552e-07	9.10537e-06
16p13.3	M76	KIRC	117	3	1.67667	0.00103896	9/148	117/17735	5.90458e-07	1.62376e-05
16p13.3	M846	KIRC	23	5	1.54275	0.0055069	9/148	23/17735	1.1358e-13	1.87407e-11
16p13.3	M305	KIRC	263	4	1.37824	0.0375861	13/148	263/17735	3.21494e-07	1.06093e-05
16p13.3	M47	KIRP	114	2	0.514042	0.0381585	11/147	114/16335	6.26213e-09	1.36723e-07
16p13.3	M40	LGG	85	3	0.665757	0.0070252	6/159	85/17935	0.000108426	0.00314437
16p13.3	M60	LGG	226	3	0.692567	0.0127413	19/159	226/17935	1.43508e-13	1.4566e-11
16p13.3	M187	LIHC	243	4	1.91116	0.000483693	8/151	243/17072	0.00145456	0.00840412
16p13.3	M1402	LIHC	86	6	1.60423	0.0104488	5/151	86/17072	0.000992111	0.00606938
16p13.3	M1113	LIHC	17	5	0.640774	0.0148304	7/151	17/17072	6.64963e-11	6.91561e-10
16p13.3	M771	LIHC	98	5	1.49522	0.027959	5/151	98/17072	0.0017777	0.00954188
16p13.3	M699	LUAD	25	5	0.72687	0.0466535	11/151	25/17625	5.07359e-17	5.58095e-16
16p13.3	M814	MESO	65	4	0.571941	0.0232494	7/157	65/17899	1.5876e-06	2.67908e-05
16p13.3	M1033	OV	14	6	0.625418	0.0020625	11/157	14/18231	4.82099e-21	6.74938e-20
16p13.3	M564	OV	89	5	0.64277	0.00368854	42/157	89/18231	1.5863e-64	7.77286e-63
16p13.3	M565	OV	24	5	0.668234	0.00789135	15/157	24/18231	6.55813e-26	1.60674e-24
16p13.3	M332	OV	154	4	0.676694	0.0100288	67/157	154/18231	7.84509e-102	7.68818e-100
16p13.3	M1034	OV	11	6	0.709971	0.0237133	10/157	11/18231	1.8327e-20	2.24505e-19
16p13.3	M1356	PAAD	134	6	0.630319	0.031048	7/154	134/17926	0.000158962	0.00175994
16p13.3	M508	PAAD	309	4	0.637938	0.0354621	14/154	309/17926	4.60461e-07	6.48832e-06
16p13.3	M1366	PAAD	57	6	0.655352	0.0477919	9/154	57/17926	1.27507e-09	2.47045e-08
16p13.3	M162	PCPG	35	3	0.311129	0.0252839	4/155	35/17802	0.000234587	0.00239279
16p13.3	M86	READ	112	3	3.01012	0.034588	7/143	112/16176	6.08776e-05	0.000708394
16p13.3	M975	SARC	162	4	1.69187	0.01235	6/154	162/17085	0.00351268	0.0281015
16p13.3	M849	STAD	14	6	0.680028	0.0267816	11/133	14/13732	1.64043e-20	2.1599e-19
16p13.3	M133	UCEC	29	3	0.640097	0.0461944	4/140	29/15665	0.000122011	0.00178441
16p13.3	M588	UCS	26	4	2.35773	0.0186286	4/157	26/17473	8.03883e-05	0.0013666
16p13.3	M1325	UCS	12	5	2.19132	0.0311177	4/157	12/17473	2.93598e-06	8.98409e-05
16p13.3	M199	UCS	31	3	2.09122	0.0388493	21/157	31/17473	1.08618e-36	1.66186e-34
19p13.11	M416	BLCA	66	4	0.70206	0.021971	5/79	66/17609	1.15354e-05	0.000124162
19p13.11	M921	BRCA	76	6	0.65164	0.0148478	4/82	76/17355	0.00045862	0.00337711
19p13.11	M295	BRCA	101	5	0.665052	0.0200185	5/82	101/17355	0.000115604	0.000936391
19p13.11	M174	CESC	24	2	0.354731	0.000260936	11/77	24/17329	1.50807e-20	3.46855e-19
19p13.11	M28	CESC	77	2	0.468012	0.00516762	18/77	77/17329	7.18419e-27	4.95709e-25
19p13.11	M431	CESC	52	3	0.557107	0.0278445	14/77	52/17329	5.19603e-22	1.79263e-20
19p13.11	M60	CHOL	409	2	3.14754	0.0304143	11/77	409/17619	1.55755e-06	0.000200924
19p13.11	M1374	HNSC	91	6	0.556788	3.61516e-05	4/83	91/17201	0.00097925	0.0094008
19p13.11	M749	HNSC	120	5	0.560126	4.44429e-05	4/83	120/17201	0.00270828	0.0216663
19p13.11	M189	HNSC	278	4	0.647802	0.00204197	7/83	278/17201	0.000389046	0.00414982
19p13.11	M756	HNSC	128	5	0.681479	0.00624559	4/83	128/17201	0.00341645	0.0234271
19p13.11	M109	HNSC	58	4	0.682708	0.00647631	4/83	58/17201	0.000175367	0.00240503
19p13.11	M12	KIRC	178	4	2.0647	5.75e-06	6/81	178/17735	0.00016351	0.004333
19p13.11	M164	KIRC	95	5	2.05546	6.12331e-06	5/81	95/17735	7.36789e-05	0.00349549
19p13.11	M75	KIRC	308	3	2.05861	6.39728e-06	8/81	308/17735	8.09353e-05	0.00349549
19p13.11	M345	KIRC	107	4	1.73837	0.000447678	4/81	107/17735	0.00145869	0.0193276
19p13.11	M1390	KIRC	82	6	1.35688	0.0479847	4/81	82/17735	0.000538884	0.0114243
19p13.11	M244	LIHC	53	4	1.91066	0.000502994	4/79	53/17072	0.000104686	0.00232927
19p13.11	M28	LIHC	124	3	1.8592	0.000797153	4/79	124/17072	0.00261766	0.0291214
19p13.11	M915	LIHC	38	5	1.78405	0.00173694	4/79	38/17072	2.78146e-05	0.000825165
19p13.11	M199	LUAD	14	4	0.629744	0.00527069	8/83	14/17625	5.02141e-16	1.43947e-14
19p13.11	M1113	LUAD	122	6	0.649107	0.00737043	5/83	122/17625	0.000276149	0.00339268
19p13.11	M628	LUAD	198	5	0.653399	0.00848856	6/83	198/17625	0.000342996	0.00368721
19p13.11	M231	LUAD	82	4	0.655877	0.00907171	4/83	82/17625	0.000604906	0.00520219
19p13.11	M915	OV	49	6	0.674224	0.00997	7/83	49/18231	2.30587e-09	1.67999e-08
19p13.11	M508	PAAD	309	4	0.637938	0.0354621	6/83	309/17926	0.003104	0.0225557
19p13.11	M294	READ	253	5	2.78667	0.0362304	5/74	253/16176	0.00603076	0.0329918
19p13.11	M484	SARC	86	4	0.50911	0.00186142	4/77	86/17085	0.000612169	0.00785616
19p13.11	M716	SARC	13	4	1.67093	0.0155692	5/77	13/17085	2.03917e-09	3.9254e-08
19p13.11	M1024	SKCM	16	4	0.386298	0.0182783	4/84	16/17614	8.38455e-07	1.2457e-05
19p13.11	M283	STAD	18	5	0.566888	0.00122234	6/64	18/13732	1.43245e-10	1.3465e-09
19p13.11	M33	STAD	60	4	0.598441	0.0033742	13/64	60/13732	5.85145e-19	2.75018e-17
19p13.11	M841	STAD	21	6	0.649461	0.0140936	6/64	21/13732	4.14184e-10	3.24444e-09
19p13.11	M282	STAD	42	5	0.658159	0.0168244	7/64	42/13732	8.0886e-10	5.43092e-09
19p13.11	M656	STAD	219	6	1.45645	0.0344372	4/64	219/13732	0.0189858	0.0424921
19p13.11	M78	UCEC	254	5	0.504254	0.00263121	6/74	254/15665	0.00126332	0.0106208
19p13.11	M1561	UCS	13	5	2.15699	0.0380219	7/79	13/17473	4.93961e-14	7.90338e-13
19p13.11	M83	UVM	62	3	0.0418403	0.00221486	4/76	62/16266	0.00019992	0.0173938
19p13.3	M570	ACC	119	4	3.60113	0.0029273	7/165	119/17275	0.000145932	0.00215249
19p13.3	M1235	ACC	108	5	3.52582	0.003369	7/165	108/17275	7.92883e-05	0.00155934
19p13.3	M13	ACC	130	3	2.73271	0.0181684	7/165	130/17275	0.000252143	0.00297529
19p13.3	M485	ACC	51	4	2.6983	0.0196346	28/165	51/17275	4.10292e-44	3.63108e-42
19p13.3	M99	ACC	60	3	2.6983	0.0196346	30/165	60/17275	1.46754e-45	2.59754e-43
19p13.3	M877	ACC	94	4	2.41475	0.0347929	5/165	94/17275	0.002072	0.0203747
19p13.3	M1446	BRCA	35	5	0.700061	0.0415568	10/162	35/17355	5.70111e-13	7.98155e-12
19p13.3	M441	CESC	16	3	0.423026	0.00168421	13/157	16/17329	9.14016e-25	1.7671e-23
19p13.3	M30	CESC	91	2	0.508916	0.0128506	55/157	91/17329	2.27409e-92	2.63795e-90
19p13.3	M72	CESC	41	2	0.533857	0.019505	25/157	41/17329	1.04935e-41	4.05747e-40
19p13.3	M1187	CESC	42	4	0.544686	0.0236317	22/157	42/17329	1.09129e-34	3.16474e-33
19p13.3	M569	CESC	12	3	0.574442	0.0376796	9/157	12/17329	7.01409e-17	1.01704e-15
19p13.3	M567	CESC	17	3	0.58136	0.0414341	13/157	17/17329	3.85457e-24	6.38757e-23
19p13.3	M440	CESC	75	3	0.584721	0.0439939	42/157	75/17329	6.47131e-68	3.75336e-66
19p13.3	M393	CHOL	94	3	3.14754	0.0304143	11/158	94/17619	7.73365e-10	5.54245e-08
19p13.3	M60	CHOL	409	2	3.14754	0.0304143	26/158	409/17619	3.64886e-15	7.84506e-13
19p13.3	M423	HNSC	13	5	0.754466	0.0430221	7/156	13/17201	7.22639e-12	1.21945e-10
19p13.3	M910	KIRC	25	5	2.27684	2.86431e-07	4/162	25/17735	7.30617e-05	0.00116168
19p13.3	M432	KIRC	137	4	2.25876	4.58864e-07	8/162	137/17735	3.75752e-05	0.000663829
19p13.3	M75	KIRC	308	3	2.05861	6.39728e-06	21/162	308/17735	7.65149e-13	1.21659e-10
19p13.3	M348	KIRC	61	4	1.9539	2.08765e-05	7/162	61/17735	1.34354e-06	5.34056e-05
19p13.3	M345	KIRC	107	4	1.73837	0.000447678	8/162	107/17735	6.17447e-06	0.000163624
19p13.3	M316	KIRC	57	4	1.69524	0.000806033	9/162	57/17735	2.18982e-09	1.7409e-07
19p13.3	M869	KIRC	36	5	1.60982	0.00243028	4/162	36/17735	0.000314633	0.00454788
19p13.3	M305	KIRC	263	4	1.37824	0.0375861	12/162	263/17735	5.52116e-06	0.000163624
19p13.3	M1390	KIRC	82	6	1.35688	0.0479847	7/162	82/17735	9.97218e-06	0.000226511
19p13.3	M27	KIRP	174	2	2.36268	0.00969624	12/156	174/16335	1.0856e-07	2.65972e-06
19p13.3	M229	KIRP	34	3	2.35135	0.0100862	9/156	34/16335	2.24056e-11	8.23405e-10
19p13.3	M678	KIRP	106	4	0.498416	0.0299565	7/156	106/16335	6.99586e-05	0.00102839
19p13.3	M171	KIRP	176	3	0.529373	0.047519	10/156	176/16335	7.37812e-06	0.000154941
19p13.3	M588	LGG	71	5	1.90505	1.64184e-05	4/164	71/17935	0.00406991	0.0395686
19p13.3	M78	LGG	187	3	0.647621	0.00323748	8/164	187/17935	0.000329	0.00442885
19p13.3	M196	LIHC	48	4	1.51784	0.0213957	11/164	48/17072	7.62222e-13	1.372e-11
19p13.3	M678	LUAD	85	5	0.552386	0.000307737	5/162	85/17625	0.00111909	0.00803391
19p13.3	M704	LUAD	20	5	1.62051	0.00278757	4/162	20/17625	2.97067e-05	0.000294367
19p13.3	M374	LUAD	28	5	0.704935	0.0280504	4/162	28/17625	0.000118549	0.000998981
19p13.3	M423	MESO	18	3	1.95683	0.00795898	12/164	18/17899	4.12023e-21	1.57599e-19
19p13.3	M1359	PAAD	32	6	0.442992	0.00022976	11/166	32/17926	3.35146e-15	2.64765e-13
19p13.3	M1513	PAAD	26	7	0.46499	0.00052714	7/166	26/17926	2.91764e-09	5.12207e-08
19p13.3	M1024	PAAD	44	5	0.497666	0.00150401	11/166	44/17926	1.81062e-13	9.53595e-12
19p13.3	M1356	PAAD	134	6	0.630319	0.031048	8/166	134/17926	3.53998e-05	0.000466098
19p13.3	M508	PAAD	309	4	0.637938	0.0354621	24/166	309/17926	1.15722e-15	1.82841e-13
19p13.3	M78	SARC	10	3	0.629062	0.0287752	5/162	10/17085	1.74744e-08	2.88328e-07
19p13.3	M1024	SKCM	16	4	0.386298	0.0182783	5/164	16/17614	2.64655e-07	2.72216e-06
19p13.3	M53	STAD	22	4	0.496473	8.52386e-05	16/139	22/13732	3.54258e-28	8.05937e-27
19p13.3	M285	STAD	38	5	0.678126	0.0256289	23/139	38/13732	2.68521e-37	1.22177e-35
19p13.3	M34	STAD	52	4	0.679124	0.0261168	30/139	52/13732	1.15756e-47	1.05338e-45
19p13.3	M225	TGCT	75	3	2.27914	0.0288375	5/166	75/18167	0.000617924	0.00968081
19p13.3	M822	TGCT	68	4	2.27914	0.0288375	5/166	68/18167	0.000392849	0.00738555
19p13.3	M78	UCEC	254	5	0.504254	0.00263121	10/141	254/15665	0.00010116	0.000601011
19p13.3	M1314	UCEC	23	6	0.535216	0.00591879	11/141	23/15665	2.60677e-17	5.26567e-16
19p13.3	M665	UCEC	56	4	0.581182	0.016357	18/141	56/15665	7.81511e-24	3.94663e-22
19p13.3	M10	UCEC	315	4	1.69536	0.0194404	12/141	315/15665	2.78888e-05	0.000216675
19p13.3	M1149	UCEC	33	5	0.618549	0.031722	11/141	33/15665	3.4568e-15	4.98767e-14
19q13.43	M812	BLCA	256	4	0.635674	0.0035105	5/67	256/17609	0.00289621	0.00779749
19q13.43	M208	BLCA	295	3	0.657489	0.00680112	5/67	295/17609	0.00528238	0.0123256
19q13.43	M458	CESC	38	3	1.93676	0.0130671	12/61	38/17329	2.88929e-21	4.76733e-20
19q13.43	M1218	CESC	20	4	1.76183	0.032188	4/61	20/17329	6.45367e-07	2.66214e-06
19q13.43	M102	COAD	284	4	1.86902	0.0116615	4/26	284/8687	0.00947553	0.0379021
19q13.43	M347	COAD	173	5	1.69843	0.0322643	4/26	173/8687	0.00161236	0.00752436
19q13.43	M109	HNSC	58	4	0.682708	0.00647631	6/66	58/17201	8.75634e-08	4.01332e-07
19q13.43	M1056	HNSC	26	6	0.755767	0.0441675	5/66	26/17201	4.40511e-08	2.42281e-07
19q13.43	M423	KICH	28	4	0.095088	0.026753	4/67	28/17284	3.93632e-06	5.3534e-05
19q13.43	M75	KIRC	308	3	2.05861	6.39728e-06	5/65	308/17735	0.0053978	0.017146
19q13.43	M136	KIRC	31	3	0.594924	0.00103311	20/65	31/17735	6.0634e-43	3.27424e-41
19q13.43	M625	KIRC	22	4	0.696222	0.0195849	16/65	22/17735	1.04686e-35	2.82652e-34
19q13.43	M451	KIRC	46	4	1.41556	0.0240697	5/65	46/17735	6.90163e-07	6.21147e-06
19q13.43	M346	KIRP	37	3	0.523008	0.0403328	11/66	37/16335	1.5359e-18	2.76463e-17
19q13.43	M36	LGG	66	3	2.05572	2.78794e-06	6/67	66/17935	1.64776e-07	8.03282e-07
19q13.43	M933	LGG	46	5	1.93847	1.5417e-05	26/67	46/17935	1.5094e-53	1.96222e-52
19q13.43	M246	LGG	16	4	1.87356	3.0013e-05	4/67	16/17935	3.12939e-07	1.22046e-06
19q13.43	M398	LGG	54	4	1.85959	4.59265e-05	27/67	54/17935	1.18283e-53	1.96222e-52
19q13.43	M71	LGG	98	3	1.76925	0.000143711	33/67	98/17935	6.30394e-59	2.45853e-57
19q13.43	M400	LGG	10	4	1.49363	0.0067816	4/67	10/17935	3.6723e-08	2.04599e-07
19q13.43	M1409	LGG	20	7	1.45723	0.0119781	4/67	20/17935	8.23754e-07	2.92058e-06
19q13.43	M577	LGG	202	5	1.44673	0.0127289	16/67	202/17935	2.49796e-17	2.43551e-16
19q13.43	M1525	LGG	47	8	1.36265	0.0365118	6/67	47/17935	2.05833e-08	1.33792e-07
19q13.43	M31	LIHC	33	3	1.47521	0.0323194	10/68	33/17072	4.336e-17	6.0704e-16
19q13.43	M610	MESO	20	3	1.82405	0.0188035	9/68	20/17899	1.54473e-17	2.78052e-16
19q13.43	M1252	MESO	12	4	1.67926	0.0389017	6/68	12/17899	2.17708e-12	1.67946e-11
19q13.43	M1116	PAAD	55	5	0.420132	0.000112337	4/67	55/17926	5.26607e-05	0.000542256
19q13.43	M551	PAAD	76	4	0.478931	0.000836633	5/67	76/17926	9.43074e-06	0.000118827
19q13.43	M538	PAAD	71	4	0.51009	0.00202326	4/67	71/17926	0.000143444	0.00112962
19q13.43	M89	PAAD	363	3	0.526383	0.00356013	8/67	363/17926	6.02507e-05	0.000542256
19q13.43	M452	PAAD	44	4	0.596826	0.0164436	17/67	44/17926	3.78898e-31	2.38706e-29
19q13.43	M142	SARC	32	3	1.81425	0.00569661	23/68	32/17085	2.57606e-50	1.05618e-48
19q13.43	M936	SARC	34	4	1.5972	0.0288688	13/68	34/17085	1.61797e-23	3.31684e-22
19q13.43	M233	SKCM	51	3	2.33684	0.0412795	10/66	51/17614	3.02964e-15	3.15083e-14
19q13.43	M1325	STAD	43	8	1.84358	0.000648267	8/63	43/13732	1.5838e-11	1.3304e-10
19q13.43	M1152	STAD	49	7	1.83125	0.000706187	8/63	49/13732	4.82122e-11	2.89273e-10
19q13.43	M193	STAD	45	5	1.82756	0.000773819	4/63	45/13732	5.20496e-05	0.000182174
19q13.43	M188	STAD	68	5	1.81627	0.000838696	9/63	68/13732	1.98216e-11	1.38752e-10
19q13.43	M684	STAD	58	6	1.7087	0.0027008	8/63	58/13732	1.98434e-10	1.04178e-09
19q13.43	M812	THCA	20	5	1.86138	0.0421626	4/65	20/17039	8.92426e-07	7.43974e-05
19q13.43	M105	THYM	81	3	0.38292	0.0471519	5/66	81/17619	1.30032e-05	0.000420437
19q13.43	M25	UCEC	443	2	1.86655	0.00642749	6/60	443/15665	0.00682066	0.031623
19q13.43	M671	UCEC	10	4	0.617461	0.0317687	4/60	10/15665	4.01335e-08	3.41134e-07
19q13.43	M1487	UCS	13	5	2.06188	0.039265	7/69	13/17473	1.84404e-14	1.02447e-13
19q13.43	M76	UVM	11	3	0.307588	0.0290675	4/66	11/16266	7.98444e-08	7.02631e-06
1q21.3	M155	ACC	28	3	3.01828	0.0126045	4/99	28/17275	1.86944e-05	0.000444928
1q21.3	M585	ACC	61	4	2.60923	0.0242405	9/99	61/17275	6.23875e-11	7.42411e-09
1q21.3	M591	ACC	24	4	2.51656	0.0301139	5/99	24/17275	2.17637e-07	6.47471e-06
1q21.3	M391	BLCA	40	4	1.42697	0.0212874	9/125	40/17609	7.76652e-12	8.64026e-11
1q21.3	M8	BRCA	350	3	0.681018	0.0275384	8/105	350/17355	0.00128945	0.00636666
1q21.3	M359	BRCA	46	5	1.46641	0.0281629	4/105	46/17355	0.000169791	0.000958106
1q21.3	M758	CESC	17	3	1.81775	0.0237539	4/122	17/17329	5.18434e-06	3.62904e-05
1q21.3	M148	CESC	64	2	1.73753	0.0370153	13/122	64/17329	5.26606e-16	2.39606e-14
1q21.3	M301	COAD	18	5	2.02089	0.00640669	4/64	18/8687	7.5877e-06	6.72053e-05
1q21.3	M80	KIRC	132	3	2.48946	2.80649e-08	6/100	132/17735	0.000101999	0.00277948
1q21.3	M318	KIRC	41	4	1.86451	8.5812e-05	14/100	41/17735	3.96348e-22	4.3202e-20
1q21.3	M874	KIRC	37	5	1.74396	0.000434199	13/100	37/17735	8.26801e-21	4.50606e-19
1q21.3	M117	KIRC	88	3	1.35371	0.0484925	4/100	88/17735	0.00154429	0.0187031
1q21.3	M27	KIRP	174	2	2.36268	0.00969624	15/96	174/16335	8.67328e-14	1.10151e-11
1q21.3	M783	KIRP	35	4	2.13748	0.0197177	5/96	35/16335	1.7819e-06	4.52603e-05
1q21.3	M48	KIRP	141	2	1.99976	0.0305677	5/96	141/16335	0.00145399	0.0205174
1q21.3	M790	KIRP	27	4	1.91623	0.042348	6/96	27/16335	9.42447e-09	2.99227e-07
1q21.3	M227	KIRP	85	3	1.87572	0.0495288	5/96	85/16335	0.000142818	0.00273153
1q21.3	M1066	LGG	51	6	2.14777	5.31016e-07	4/106	51/17935	0.000232641	0.0177773
1q21.3	M209	LGG	101	4	0.538957	2.8852e-05	5/106	101/17935	0.000331254	0.0177773
1q21.3	M453	LIHC	28	4	1.76574	0.00195639	8/97	28/17072	2.29098e-12	2.97828e-11
1q21.3	M477	LIHC	41	4	1.71696	0.00321039	13/97	41/17072	4.31819e-20	9.82388e-19
1q21.3	M560	LIHC	14	4	1.62121	0.00793591	4/97	14/17072	9.38388e-07	7.76303e-06
1q21.3	M1119	LIHC	15	5	1.59784	0.0101039	4/97	15/17072	1.27405e-06	9.66155e-06
1q21.3	M84	LIHC	55	3	1.54597	0.0165323	17/97	55/17072	8.78622e-26	3.99773e-24
1q21.3	M1118	LIHC	13	5	1.52396	0.0216961	4/97	13/17072	6.73208e-07	6.80688e-06
1q21.3	M732	MESO	27	3	2.46752	0.000337791	6/111	27/17899	1.32127e-08	2.51041e-07
1q21.3	M162	MESO	48	2	1.86288	0.0130581	6/111	48/17899	4.92806e-07	8.0257e-06
1q21.3	M492	PAAD	18	4	0.50348	0.00174383	5/108	18/17926	5.82036e-08	1.13497e-06
1q21.3	M17	PAAD	99	4	1.74413	0.0091889	11/108	99/17926	1.82906e-11	5.35e-10
1q21.3	M132	PAAD	11	5	1.69844	0.0133704	8/108	11/17926	2.16726e-16	1.26785e-14
1q21.3	M1453	READ	32	5	2.95811	0.0378616	5/93	32/16176	1.00374e-06	1.1794e-05
1q21.3	M170	SARC	24	3	1.5366	0.0425933	10/94	24/17085	2.85933e-17	7.62489e-16
1q21.3	M1187	TGCT	57	5	2.26725	0.0257621	4/108	57/18167	0.000366146	0.00973948
1q21.3	M162	TGCT	201	3	2.15162	0.036809	21/108	201/18167	1.5387e-20	1.02323e-18
1q21.3	M486	THYM	33	4	0.293341	0.0169752	4/102	33/17619	3.80755e-05	0.0010915
1q21.3	M38	THYM	73	3	3.03759	0.0232937	6/102	73/17619	4.03685e-06	0.000138867
1q21.3	M103	THYM	61	3	2.80596	0.0331296	4/102	61/17619	0.000428894	0.00819663
1q21.3	M270	THYM	46	4	2.61089	0.0481143	6/102	46/17619	2.51976e-07	1.94154e-05
1q21.3	M632	UCEC	12	4	1.76591	0.0117819	4/83	12/15665	3.51134e-07	2.42283e-06
1q21.3	M794	UCEC	29	4	1.72854	0.0155309	6/83	29/15665	7.93523e-09	9.12551e-08
1q21.3	M89	UCEC	49	5	1.71103	0.0193238	6/83	49/15665	2.14697e-07	1.80195e-06
1q21.3	M10	UCEC	315	4	1.69536	0.0194404	10/83	315/15665	6.22235e-06	3.90311e-05
1q21.3	M432	UCEC	15	6	1.66027	0.0248458	6/83	15/15665	8.86991e-11	1.53006e-09
1q21.3	M183	UCEC	23	3	1.60813	0.0342469	8/83	23/15665	2.0207e-13	4.64762e-12
1q21.3	M36	UCS	85	2	0.469791	0.0337348	24/112	85/17473	1.09657e-33	1.16236e-31
1q21.3	M304	UCS	40	3	0.484284	0.0416228	13/112	40/17473	1.56703e-19	5.53683e-18
1q21.3	M37	UVM	151	2	7.45663	0.00222483	6/83	151/16266	0.000121417	0.00551142
1q21.3	M299	UVM	97	3	5.29092	0.0042984	5/83	97/16266	0.000136647	0.00551142
3p21.31	M116	ACC	61	3	0.38649	0.0221358	6/111	61/17275	2.55864e-06	6.90833e-05
3p21.31	M690	ACC	15	4	2.44855	0.0309492	5/111	15/17275	2.85368e-08	9.24593e-07
3p21.31	M1481	BLCA	167	5	0.619641	0.00205044	5/119	167/17609	0.00553881	0.0291517
3p21.31	M812	BLCA	256	4	0.635674	0.0035105	9/119	256/17609	6.06605e-05	0.000487106
3p21.31	M208	BLCA	295	3	0.657489	0.00680112	13/119	295/17609	1.00481e-07	1.00481e-06
3p21.31	M785	BRCA	24	4	0.609636	0.00501804	9/115	24/17355	2.15499e-14	3.51982e-13
3p21.31	M208	BRCA	63	3	0.667324	0.0199306	14/115	63/17355	3.97002e-18	7.78123e-17
3p21.31	M745	BRCA	32	4	0.672415	0.0228787	13/115	32/17355	7.38318e-21	1.80888e-19
3p21.31	M1302	BRCA	23	5	0.675974	0.0248168	8/115	23/17355	1.31048e-12	1.83468e-11
3p21.31	M202	BRCA	61	3	0.686926	0.0316066	27/115	61/17355	7.37852e-44	7.23095e-42
3p21.31	M1301	BRCA	10	5	0.707488	0.0468589	4/115	10/17355	3.72568e-07	4.56396e-06
3p21.31	M1470	CHOL	12	5	0.347564	0.0483781	5/117	12/17619	9.04157e-09	1.59132e-06
3p21.31	M464	COAD	127	6	1.83745	0.0150487	6/55	127/8687	0.000139886	0.00209829
3p21.31	M236	COAD	196	5	1.76146	0.0226079	6/55	196/8687	0.00141223	0.0169468
3p21.31	M656	COAD	108	7	1.70403	0.0317377	6/55	108/8687	5.67754e-05	0.00113551
3p21.31	M1272	HNSC	11	6	0.719004	0.0195028	5/120	11/17201	6.78925e-09	1.33522e-07
3p21.31	M603	HNSC	28	5	0.74085	0.0319403	11/120	28/17201	2.31761e-17	9.11594e-16
3p21.31	M128	HNSC	65	4	0.750085	0.0388096	22/120	65/17201	4.53752e-32	5.35428e-30
3p21.31	M30	HNSC	78	3	0.752048	0.0422175	6/120	78/17201	1.73359e-05	0.000227293
3p21.31	M81	KIRC	140	3	1.77611	0.000254369	8/122	140/17735	5.57288e-06	7.91956e-05
3p21.31	M98	KIRC	54	3	1.66605	0.00102451	4/122	54/17735	0.000516803	0.0054463
3p21.31	M351	KIRC	36	4	1.63594	0.00157982	5/122	36/17735	4.5088e-06	7.72132e-05
3p21.31	M373	KIRC	100	4	1.54883	0.00485063	7/122	100/17735	5.7807e-06	7.91956e-05
3p21.31	M951	KIRC	51	5	1.42143	0.0226321	6/122	51/17735	1.30943e-06	2.98986e-05
3p21.31	M1422	KIRC	43	6	1.38092	0.036063	6/122	43/17735	4.63597e-07	1.27026e-05
3p21.31	M355	KIRP	55	3	0.161555	1.04678e-05	6/113	55/16335	2.10921e-06	1.58894e-05
3p21.31	M59	KIRP	100	2	0.163576	1.20435e-05	12/113	100/16335	4.17619e-12	1.57303e-10
3p21.31	M977	KIRP	30	4	0.285879	0.000348165	6/113	30/16335	4.9717e-08	4.68168e-07
3p21.31	M1353	KIRP	24	5	0.291962	0.000434149	6/113	24/16335	1.16566e-08	1.3172e-07
3p21.31	M41	KIRP	34	2	0.429807	0.0111632	7/113	34/16335	2.89705e-09	4.09208e-08
3p21.31	M61	LGG	127	3	0.610457	0.00094266	6/118	127/17935	0.000193126	0.006518
3p21.31	M215	LGG	11	4	0.624348	0.00148417	5/118	11/17935	5.06743e-09	3.42052e-07
3p21.31	M60	LGG	226	3	0.692567	0.0127413	6/118	226/17935	0.00382665	0.0469635
3p21.31	M342	LGG	21	4	0.726484	0.0308903	8/118	21/17935	5.22978e-13	7.06021e-11
3p21.31	M969	LUAD	11	6	0.72689	0.0463174	9/115	11/17625	8.47657e-19	8.98516e-17
3p21.31	M589	MESO	24	3	0.545814	0.0160304	5/121	24/17899	4.9826e-07	5.64695e-06
3p21.31	M1225	MESO	15	4	0.562382	0.021141	4/121	15/17899	2.56052e-06	2.61173e-05
3p21.31	M1817	OV	15	7	0.686896	0.0136171	15/121	15/18231	8.69426e-34	2.49236e-32
3p21.31	M792	OV	29	6	0.72197	0.031434	9/121	29/18231	1.65484e-13	1.58129e-12
3p21.31	M1447	OV	24	7	0.725694	0.0341688	4/121	24/18231	1.77019e-05	0.000126864
3p21.31	M1177	OV	33	6	0.741478	0.0481996	18/121	33/18231	1.59336e-31	2.74058e-30
3p21.31	M1187	PAAD	111	5	0.417954	0.000112493	5/117	111/17926	0.000803364	0.0110864
3p21.31	M435	PAAD	105	4	1.77502	0.00767251	9/117	105/17926	2.80109e-08	7.73102e-07
3p21.31	M872	PAAD	15	5	0.609927	0.0226659	7/117	15/17926	2.59316e-12	1.78928e-10
3p21.31	M601	SARC	12	4	1.85948	0.00451976	6/117	12/17085	8.09752e-11	2.28755e-09
3p21.31	M101	SARC	88	3	0.606697	0.0196159	8/117	88/17085	1.54734e-07	3.49698e-06
3p21.31	M135	SKCM	37	2	0.377229	0.015475	6/120	37/17614	1.7247e-07	2.39733e-05
3p21.31	M164	TGCT	264	3	2.27129	0.0315504	9/117	264/18167	5.30988e-05	0.00147615
3p21.31	M632	TGCT	187	4	2.19096	0.0397079	6/117	187/18167	0.00133488	0.0309247
3p21.31	M24	UCEC	225	2	1.92859	0.00405437	7/106	225/15665	0.000840056	0.0112008
3p21.31	M681	UCEC	26	4	0.612408	0.0288918	4/106	26/15665	2.64014e-05	0.00105606
3p21.31	M340	UVM	67	3	0.071803	0.000841977	4/109	67/16266	0.00105715	0.0151525
3p21.31	M916	UVM	21	4	0.0842631	0.00138354	4/109	21/16266	1.04582e-05	0.000269822
3p21.31	M116	UVM	141	3	0.0460765	0.00299038	10/109	141/16266	3.56859e-08	1.15087e-06
3p21.31	M304	UVM	102	3	0.0460765	0.00299038	5/109	102/16266	0.000612674	0.00987937
3p21.31	M472	UVM	109	4	0.0460765	0.00299038	10/109	109/16266	2.94356e-09	3.7972e-07
3p21.31	M114	UVM	118	3	0.165225	0.00515328	10/109	118/16266	6.40033e-09	4.12821e-07
3p21.31	M469	UVM	80	4	0.167657	0.00554148	5/109	80/16266	0.000198675	0.0036613
3p21.31	M115	UVM	72	3	0.232634	0.0230046	8/109	72/16266	2.62982e-08	1.13082e-06
5q31.3	M1093	ACC	98	5	0.269207	0.00313418	5/79	98/17275	8.57197e-05	0.000634326
5q31.3	M76	ACC	248	3	0.271414	0.00332588	6/79	248/17275	0.000955025	0.0054363
5q31.3	M412	ACC	133	4	0.342764	0.0121352	5/79	133/17275	0.000358233	0.00240993
5q31.3	M683	BLCA	20	4	1.40248	0.0285287	16/76	20/17609	1.27692e-35	2.25589e-34
5q31.3	M51	BRCA	21	4	1.48793	0.02383	19/74	21/17355	1.55124e-44	7.60109e-43
5q31.3	M206	BRCA	11	3	1.43084	0.0402153	11/74	11/17355	3.89062e-27	9.53203e-26
5q31.3	M589	CESC	26	3	1.97609	0.0112002	4/68	26/17329	3.03727e-06	2.38643e-05
5q31.3	M637	CESC	10	3	1.90324	0.0164912	7/68	10/17329	1.23944e-15	2.27231e-14
5q31.3	M1035	CESC	11	5	1.86118	0.0196138	10/68	11/17329	4.75059e-24	2.61283e-22
5q31.3	M94	CESC	26	2	1.75049	0.0369335	12/68	26/17329	4.42236e-23	1.21615e-21
5q31.3	M123	COAD	19	4	1.67134	0.0346104	16/60	19/8687	2.88235e-33	1.06647e-31
5q31.3	M787	KIRC	111	6	0.467441	2.35805e-06	6/77	111/17735	8.66874e-06	7.47679e-05
5q31.3	M221	KIRC	122	5	0.491504	8.82408e-06	17/77	122/17735	1.89679e-21	6.54393e-20
5q31.3	M647	KIRC	28	4	0.616923	0.00187213	4/77	28/17735	6.21288e-06	6.12412e-05
5q31.3	M779	KIRC	91	6	0.652597	0.0060233	8/77	91/17735	5.5339e-09	9.54597e-08
5q31.3	M1366	KIRC	84	7	0.667134	0.00903262	5/77	84/17735	3.19524e-05	0.000244968
5q31.3	M144	KIRC	62	3	0.713827	0.0280601	4/77	62/17735	0.000151374	0.000949531
5q31.3	M27	LGG	261	3	0.538924	2.8009e-05	13/72	261/17935	3.21858e-11	2.86454e-09
5q31.3	M638	LUAD	191	5	0.629332	0.00404074	4/73	191/17625	0.00813185	0.042877
5q31.3	M285	LUSC	157	5	1.4515	0.017034	11/77	157/18019	6.28953e-11	6.41532e-10
5q31.3	M910	LUSC	133	6	1.39346	0.0323542	9/77	133/18019	5.22434e-09	4.44069e-08
5q31.3	M1915	MESO	62	8	2.1921	0.00185488	4/79	62/17899	0.000161437	0.00143276
5q31.3	M1843	MESO	183	7	2.1411	0.00256378	4/79	183/17899	0.0087578	0.0428949
5q31.3	M493	MESO	14	3	0.485599	0.00510577	4/79	14/17899	3.40182e-07	4.02548e-06
5q31.3	M499	OV	156	5	0.736843	0.0442161	16/78	156/18231	4.11163e-18	2.31279e-17
5q31.3	M1474	OV	52	7	0.741219	0.0485009	9/78	52/18231	9.46747e-13	4.73374e-12
5q31.3	M364	PAAD	44	4	0.418159	9.91643e-05	5/79	44/17926	1.3881e-06	6.38526e-05
5q31.3	M89	PAAD	363	3	0.526383	0.00356013	11/79	363/17926	5.32541e-07	4.89938e-05
5q31.3	M366	PAAD	133	4	0.571548	0.0107713	4/79	133/17926	0.0028313	0.03256
5q31.3	M29	SARC	270	2	1.82913	0.00442016	15/78	270/17085	1.16498e-12	1.93932e-11
5q31.3	M369	SARC	103	3	0.615691	0.0222572	11/78	103/17085	1.23132e-12	1.93932e-11
5q31.3	M1068	SARC	74	4	0.617601	0.0225816	6/78	74/17085	1.07808e-06	1.13199e-05
5q31.3	M700	STAD	94	6	2.07667	5.76547e-05	5/58	94/13732	4.64525e-05	0.000311895
5q31.3	M191	STAD	132	5	2.02582	9.47566e-05	14/58	132/13732	2.01606e-16	9.4755e-15
5q31.3	M200	STAD	35	5	2.00599	0.000122053	4/58	35/13732	1.36057e-05	0.000143428
5q31.3	M1159	STAD	68	7	1.98483	0.000149507	5/58	68/13732	9.59061e-06	0.000143428
5q31.3	M1187	STAD	80	7	1.82469	0.000790316	4/58	80/13732	0.000356827	0.00186343
5q31.3	M749	STAD	108	6	1.81378	0.000891875	4/58	108/13732	0.00110763	0.00520586
5q31.3	M640	STAD	111	6	1.70693	0.00271427	4/58	111/13732	0.00122627	0.0052395
5q31.3	M1137	STAD	45	7	1.63583	0.00557324	4/58	45/13732	3.7518e-05	0.000293891
5q31.3	M182	STAD	166	5	1.51777	0.018332	4/58	166/13732	0.00526211	0.0206099
5q31.3	M107	THYM	20	3	2.86929	0.0292805	13/76	20/17619	4.58828e-27	2.17943e-25
5q31.3	M432	UVM	16	4	0.190779	0.00457183	6/72	16/16266	4.7014e-11	1.44176e-09
5q31.3	M431	UVM	11	4	0.238461	0.0132809	10/72	11/16266	1.6496e-23	7.58815e-22
5q31.3	M52	UVM	38	2	0.279253	0.0185759	4/72	38/16266	2.32442e-05	0.000356411
5q31.3	M232	UVM	26	3	0.292289	0.0230882	5/72	26/16266	9.02921e-08	2.07672e-06
5q31.3	M82	UVM	27	3	0.267851	0.0238957	16/72	27/16266	4.54489e-32	4.1813e-30
6p22.2	M85	ACC	39	3	2.8617	0.0140087	18/40	39/17275	2.37178e-39	9.24994e-38
6p22.2	M438	ACC	17	4	2.26258	0.0491266	10/40	17/17275	2.50613e-23	4.88696e-22
6p22.2	M132	BLCA	60	3	0.715948	0.0302942	28/39	60/17609	6.99267e-64	1.53839e-62
6p22.2	M61	COAD	50	4	1.70297	0.0336011	23/32	50/8687	1.9997e-47	1.79973e-46
6p22.2	M426	HNSC	23	5	1.3657	0.0255325	14/41	23/17201	1.25481e-32	1.694e-31
6p22.2	M981	KIRC	13	5	2.24257	6.12185e-07	6/44	13/17735	2.7694e-13	2.28476e-12
6p22.2	M34	KIRC	74	3	0.482908	4.21e-06	4/44	74/17735	3.34081e-05	0.000157495
6p22.2	M92	KIRC	46	3	1.95276	2.63765e-05	22/44	46/17735	6.16461e-48	2.03432e-46
6p22.2	M401	KIRC	29	4	1.72452	0.000566037	16/44	29/17735	6.10003e-36	1.00651e-34
6p22.2	M980	KIRC	16	5	1.68564	0.000918062	10/44	16/17735	2.32381e-23	2.55619e-22
6p22.2	M11	KIRC	252	4	1.42873	0.0207919	4/44	252/17735	0.00345933	0.0114158
6p22.2	M61	KIRP	27	2	2.90402	0.001737	15/39	27/16335	3.59616e-34	1.29462e-32
6p22.2	M1121	LGG	13	6	2.07057	2.43786e-06	8/36	13/17935	1.45889e-19	2.55306e-18
6p22.2	M593	LGG	20	5	1.93766	1.50947e-05	12/36	20/17935	6.77611e-29	2.37164e-27
6p22.2	M598	LGG	12	5	1.61343	0.00133769	5/36	12/17935	1.91245e-11	2.23119e-10
6p22.2	M655	LIHC	22	5	0.602356	0.00605534	5/44	22/17072	2.29241e-09	2.00585e-08
6p22.2	M901	LUAD	11	6	1.5051	0.0113756	7/39	11/17625	4.81701e-17	4.09446e-16
6p22.2	M94	LUAD	42	4	1.47758	0.0149677	22/39	42/17625	1.12752e-50	3.83358e-49
6p22.2	M376	LUAD	28	5	1.41209	0.0308793	10/39	28/17625	1.02138e-20	1.15757e-19
6p22.2	M172	LUSC	21	4	0.731032	0.0439039	10/40	21/18019	2.96447e-22	1.40812e-21
6p22.2	M17	MESO	193	2	3.20727	8.34801e-06	8/41	193/17899	1.11352e-08	5.12437e-08
6p22.2	M1861	MESO	17	7	0.441491	0.00157685	8/41	17/17899	8.7733e-18	9.06574e-17
6p22.2	M1481	MESO	265	5	1.92723	0.00914907	18/41	265/17899	9.74446e-23	1.51039e-21
6p22.2	M1728	MESO	41	6	0.563445	0.0232366	18/41	41/17899	7.21336e-39	2.23614e-37
6p22.2	M6	PAAD	416	3	1.86221	0.0041811	4/41	416/17926	0.0147131	0.047082
6p22.2	M546	PAAD	17	4	1.70943	0.0146631	5/41	17/17926	2.94807e-10	3.14461e-09
6p22.2	M482	READ	19	4	4.10428	0.0121634	7/33	19/16176	3.6857e-15	5.71284e-14
6p22.2	M309	TGCT	467	3	2.53692	0.0135395	5/39	467/18167	0.00307695	0.0184617
6p22.2	M33	UCEC	391	2	1.89945	0.00455133	10/34	391/15665	6.42959e-09	2.25036e-08
6p22.2	M81	UCEC	51	5	0.628347	0.0395163	4/34	51/15665	4.29951e-06	1.00322e-05
6p22.2	M209	UCS	12	3	2.13327	0.0337966	5/39	12/17473	3.3237e-11	8.47543e-10
7q22.1	M417	BLCA	100	4	0.671977	0.0109911	5/89	100/17609	0.000151969	0.00240112
7q22.1	M23	CESC	133	2	0.551399	0.0244056	5/88	133/17329	0.000581078	0.0029884
7q22.1	M464	COAD	127	6	1.83745	0.0150487	6/38	127/8687	1.6319e-05	0.000266544
7q22.1	M236	COAD	196	5	1.76146	0.0226079	6/38	196/8687	0.00018477	0.00181074
7q22.1	M656	COAD	108	7	1.70403	0.0317377	5/38	108/8687	9.79922e-05	0.0012004
7q22.1	M1665	ESCA	12	5	0.522003	0.0289007	8/96	12/18422	1.96446e-16	2.81573e-15
7q22.1	M207	GBM	54	3	1.4855	0.0419523	10/91	54/17622	1.61134e-13	1.53077e-11
7q22.1	M28	HNSC	303	3	0.711634	0.0154185	9/93	303/17201	3.81814e-05	0.000617232
7q22.1	M1048	KICH	58	5	0.104412	0.0333946	6/89	58/17284	5.13096e-07	7.56817e-06
7q22.1	M1558	KICH	44	6	0.104412	0.0333946	6/89	44/17284	9.47981e-08	1.59803e-06
7q22.1	M1742	KICH	33	7	0.104412	0.0333946	4/89	33/17284	2.39785e-05	0.000314385
7q22.1	M919	KIRC	39	5	2.2817	3.91376e-07	10/96	39/17735	7.45515e-15	4.39854e-13
7q22.1	M353	KIRC	63	4	2.07977	5.49979e-06	10/96	63/17735	1.34778e-12	5.30128e-11
7q22.1	M427	KIRC	101	4	2.02955	8.70841e-06	5/96	101/17735	0.000219897	0.00370683
7q22.1	M1414	KIRC	15	6	1.84763	0.000108252	8/96	15/17735	3.41356e-15	4.02801e-13
7q22.1	M139	KIRC	61	3	0.570587	0.000303082	4/96	61/17735	0.000332189	0.00489979
7q22.1	M76	KIRC	117	3	1.67667	0.00103896	10/96	117/17735	7.40684e-10	2.18502e-08
7q22.1	M843	LGG	22	5	1.85709	4.73726e-05	10/90	22/17935	3.72187e-18	1.80511e-16
7q22.1	M61	LGG	127	3	0.610457	0.00094266	4/90	127/17935	0.00383204	0.0265506
7q22.1	M1323	LGG	13	6	1.50675	0.0057446	7/90	13/17935	1.05772e-13	3.41996e-12
7q22.1	M322	LGG	38	4	1.42927	0.0154343	15/90	38/17935	1.33225e-25	1.29229e-23
7q22.1	M31	LGG	85	3	1.3814	0.0301501	7/90	85/17935	2.27183e-07	3.1481e-06
7q22.1	M1092	LIHC	20	5	0.671563	0.0286164	7/90	20/17072	6.54202e-12	2.02803e-10
7q22.1	M435	LIHC	27	4	0.676804	0.0323679	7/90	27/17072	7.27384e-11	1.69117e-09
7q22.1	M502	LUSC	95	5	0.721004	0.0385016	5/93	95/18019	0.000132005	0.000950436
7q22.1	M33	MESO	40	2	0.568808	0.0247523	4/91	40/17899	4.96689e-05	0.000845909
7q22.1	M550	OV	38	5	1.48058	0.00973948	6/89	38/18231	2.77826e-08	2.43869e-07
7q22.1	M1185	PAAD	103	5	0.541877	0.00494272	4/90	103/17926	0.00179885	0.0350776
7q22.1	M1451	PAAD	61	6	0.555751	0.00767942	4/90	61/17926	0.00024917	0.00583058
7q22.1	M1107	SKCM	90	4	2.74347	0.0122757	4/91	90/17614	0.00121384	0.00801137
7q22.1	M224	UCEC	95	3	1.60078	0.0362457	4/84	95/15665	0.00169074	0.0214966
Xq28	M1242	ACC	131	5	0.122485	0.000119556	4/81	131/17275	0.00334841	0.0361628
Xq28	M844	ACC	142	4	0.203827	0.000727233	4/81	142/17275	0.00446329	0.0438214
Xq28	M380	ACC	13	4	0.375681	0.0215903	6/81	13/17275	1.47113e-11	9.27185e-10
Xq28	M1088	ACC	15	5	2.29102	0.0469345	6/81	15/17275	4.25891e-11	1.53321e-09
Xq28	M1237	BLCA	84	5	1.43162	0.0206704	4/90	84/17609	0.000901354	0.00676016
Xq28	M536	BLCA	104	4	1.40635	0.0277341	4/90	104/17609	0.00198792	0.0124245
Xq28	M1590	BLCA	11	6	0.733462	0.0442961	6/90	11/17609	6.81171e-12	8.51464e-11
Xq28	M735	CESC	10	3	0.555735	0.0258919	10/91	10/17329	9.57541e-24	2.36193e-22
Xq28	M134	CESC	36	2	0.560827	0.0287873	25/91	36/17329	1.56482e-50	1.15797e-48
Xq28	M205	COAD	19	5	1.83022	0.0133298	13/55	19/8687	1.50084e-25	5.10284e-24
Xq28	M198	ESCA	27	3	1.86118	0.0297969	22/95	27/18422	2.69524e-47	3.07257e-45
Xq28	M403	ESCA	28	3	1.86798	0.0334932	6/95	28/18422	5.50982e-09	1.5703e-07
Xq28	M741	GBM	16	4	1.47295	0.0456768	5/85	16/17622	9.71005e-09	1.14579e-06
Xq28	M98	HNSC	45	4	1.58316	0.00126781	5/72	45/17201	1.19693e-06	1.72358e-05
Xq28	M505	HNSC	36	5	1.3901	0.020032	5/72	36/17201	3.80284e-07	6.84511e-06
Xq28	M101	HNSC	42	4	1.37477	0.0226856	22/72	42/17201	6.51831e-43	2.34659e-41
Xq28	M520	HNSC	33	5	1.3737	0.0229581	22/72	33/17201	2.51777e-46	1.81279e-44
Xq28	M753	KIRC	35	6	2.77157	6.94148e-10	7/84	35/17735	2.50339e-10	3.07917e-08
Xq28	M215	KIRC	90	5	2.57051	8.46475e-09	7/84	90/17735	2.25619e-07	1.38756e-05
Xq28	M706	LGG	103	5	0.490335	2.10721e-06	5/82	103/17935	0.000108868	0.00435473
Xq28	M371	LGG	59	4	0.735204	0.0371804	4/82	59/17935	0.000152562	0.00457687
Xq28	M864	LIHC	34	5	1.68052	0.00435119	10/87	34/17072	8.22321e-16	1.23348e-14
Xq28	M1449	LIHC	20	6	1.61981	0.00807868	1987-06-01	20/17072	5.38129e-10	5.76567e-09
Xq28	M129	LIHC	38	3	1.51213	0.0234341	1987-04-01	38/17072	4.06845e-05	0.000339038
Xq28	M1584	LIHC	65	7	1.43253	0.0473353	1987-04-01	65/17072	0.000336083	0.00229147
Xq28	M78	MESO	41	2	0.536179	0.0137742	1985-09-01	41/17899	2.46059e-13	8.6941e-12
Xq28	M344	PAAD	114	4	0.514684	0.00262174	1981-04-01	114/17926	0.00177116	0.0342371
Xq28	M86	PAAD	383	3	0.559113	0.00785254	1981-07-01	383/17926	0.00172288	0.0342371
Xq28	M8	READ	385	2	2.87175	0.042061	1974-07-01	385/16176	0.00187407	0.0144815
Xq28	M120	SKCM	35	2	0.373718	0.0157555	1994-04-01	35/17614	3.50834e-05	0.000417103
Xq28	M167	STAD	211	5	1.44643	0.0366605	1963-05-01	211/13732	0.0027869	0.0133152
Xq28	M171	TGCT	28	3	0.413563	0.0250976	1994-12-01	28/18167	5.05447e-21	5.61047e-19
Xq28	M442	UCEC	63	6	2.57816	6.78826e-05	1971-04-01	63/15665	0.000188604	0.00257776
Xq28	M991	UCEC	21	7	2.14896	0.000941872	1971-04-01	21/15665	2.18741e-06	0.000111143
