# Supplementary material for: Multiscale network modeling reveals the gene regulatory landscape driving cancer prognosis in 32 cancer types
Source: Genome Res. 2023 Oct;33(10):1806–17. doi: 10.1101/gr.278063.123 (PMC10691533; doi:10.1101/gr.278063.123)
Supplement: Supplement 12 [file Supplemental_Table_S6.xlsx]

## Sheet: Supplemental_Table_S6
Supplemental Table S6. Module-enriched cytobands overlapping with copy number variation regions
Cytoband	Copy_number_Gistic2	chromosome	peak_start	peak_end
1q21.3	ACC_amp_1	1	155031376	155081940
1q21.3	BLCA_amp_3	1	150573911	150600181
1q21.3	BRCA_amp_1	1	150563314	150621176
1q21.3	CESC_amp_1	1	151300377	151331927
1q21.3	LIHC_amp_1	1	150711896	150713461
1q21.3	LUAD_amp_1	1	150812820	150879471
1q21.3	OV_amp_1	1	150647155	150647987
1q21.3	PAAD_amp_3	1	154496286	154833067
1q21.3	PCPG_amp_1	1	153495465	153618812
1q21.3	READ_amp_1	1	150286800	150632724
1q21.3	SARC_amp_3	1	153116097	153132984
1q21.3	STAD_amp_2	1	150600181	150622696
1q21.3	UCEC_amp_3	1	150519259	150584103
3p21.31	BRCA_del_4	3	49836465	49846890
3p21.31	DLBC_del_5	3	49501340	49586864
3p21.31	LGG_del_6	3	48444081	48725113
3p21.31	LUAD_del_4	3	48331332	48359256
3p21.31	PAAD_del_3	3	49972816	50138422
3p21.31	SARC_del_6	3	49225229	49305541
3p21.31	THYM_del_2	3	5291029	69821390
6p22.2	PAAD_del_9	6	26220523	26227104
7q22.1	PAAD_amp_9	7	98407758	98957204
7q22.1	PRAD_amp_7	7	98411980	98632433
7q22.1	STAD_amp_13	7	99578363	99602191
Xq28	ACC_amp_17	X	152699719	152713153
Xq28	CESC_amp_26	X	153231433	153254952
Xq28	DLBC_amp_14	X	149266914	153781435
Xq28	ESCA_amp_30	X	153055546	153180254
Xq28	HNSC_amp_28	X	152699719	152699719
Xq28	KIRC_amp_10	X	149121249	149189956
Xq28	LIHC_amp_27	X	153347588	153380726
Xq28	LUAD_amp_29	X	153690397	153765166
Xq28	LUSC_amp_30	X	153139775	153146400
Xq28	OV_amp_33	X	153242564	153282677
Xq28	PAAD_amp_23	X	148062498	148066431
Xq28	THCA_del_33	X	148623455	149402475
Xq28	UCEC_amp_49	X	153261066	153277244
12q13.13	READ_del_20	12	12914612	91452184
16p13.3	ACC_amp_12	16	2250207	2250207
16p13.3	ACC_del_20	16	6066740	7764030
16p13.3	BLCA_del_29	16	3773953	3932725
16p13.3	COAD_del_33	16	6066740	7764030
16p13.3	ESCA_del_37	16	653503	797786
16p13.3	LUAD_del_34	16	653503	751873
16p13.3	LUSC_del_39	16	3773953	3932725
16p13.3	MESO_del_19	16	6066740	7764030
16p13.3	OV_del_30	16	3773953	3932725
16p13.3	READ_del_25	16	6066740	7764030
16p13.3	STAD_del_39	16	6066740	7764030
16p13.3	UCEC_del_36	16	3773953	3932725
16p13.3	UCS_del_25	16	714155	1381917
19p13.3	BLCA_del_33	19	1103801	1107035
19p13.3	BRCA_del_37	19	1563472	1676369
19p13.3	CESC_amp_23	19	3383496	3401817
19p13.3	CESC_del_31	19	1186533	1271529
19p13.3	COAD_del_41	19	1518201	1535945
19p13.3	ESCA_del_44	19	1107160	1175396
19p13.3	GBM_amp_23	19	803086	807592
19p13.3	HNSC_del_43	19	1186533	1271529
19p13.3	KIRP_del_20	19	3975346	4040579
19p13.3	LGG_amp_18	19	750173	803086
19p13.3	LIHC_del_30	19	3354956	3481578
19p13.3	LUAD_del_39	19	284018	292583
19p13.3	LUSC_del_44	19	284018	292583
19p13.3	OV_del_35	19	1600597	1676369
19p13.3	PAAD_del_26	19	1403393	1498519
19p13.3	READ_del_32	19	284018	4182939
19p13.3	SARC_del_38	19	284018	292583
19p13.3	STAD_del_44	19	3051550	3073415
19p13.3	UCEC_del_45	19	3980367	3983991
19p13.3	UCS_del_29	19	284018	750173
19p13.3	UCS_del_31	19	2094638	2166395
19p13.11	THYM_del_9	19	18543353	18782377
19q13.43	BLCA_amp_35	19	57412253	57431135
19q13.43	DLBC_amp_13	19	56637730	57041257
19q13.43	HNSC_del_44	19	58580277	58581977
19q13.43	OV_del_36	19	58580277	58581977
19q13.43	PRAD_amp_22	19	56951009	56987172
19q13.43	SARC_del_37	19	58594503	58631676
19q13.43	UCEC_del_46	19	58865394	58878226
