# Supplementary material for: Multiscale network modeling reveals the gene regulatory landscape driving cancer prognosis in 32 cancer types
Source: Genome Res. 2023 Oct;33(10):1806–17. doi: 10.1101/gr.278063.123 (PMC10691533; doi:10.1101/gr.278063.123)
Supplement: Supplement 13 [file Supplemental_Table_S7.xlsx]

## Sheet: Supplemental_Table_S7
Supplemental Table S7. The Jaccard index of conserved modules in each cancer
Module	BLCA	BRCA	CESC	CHOL	COAD	DLBC	ESCA	GBM	HNSC	KICH	KIRC	KIRP	LGG	LIHC	LUAD	LUSC	MESO	OV	PAAD	PCPG	PRAD	READ	SARC	SKCM	STAD	TGCT	THCA	THYM	UCEC	UCS	UVM	ACC
ACC_M438	0.26	0.216667	0.37037	0.227273	0.323529	0.290323	0.30303	0.36	0.325	0.324324	0.235294	0.375	0.363636	0.458333	0.311111	0.318182	0.318182	0.310345	0.228571	0.323529	0.4	0.230769	0.37037	0.357143	0.366667	0.297297	0.361111	0.0862069	0.346154	0.318182	0.277778	1
ACC_M85	0.491228	0.461538	0.454545	0.130435	0.483333	0.265306	0.460317	0.391304	0.462687	0.479167	0.517857	0.466667	0.340909	0.428571	0.472727	0.5	0.428571	0.363636	0.302326	0.425532	0.4	0.283582	0.340909	0.470588	0.4	0.458333	0.510638	0.268657	0.357143	0.186047	0.283019	1
BLCA_M1254	1	0.298246	0.372093	0.166667	0.314286	0.171429	0.333333	0.458333	0.384615	0.25	0.36	0.318182	0.310345	0.333333	0.391304	0.363636	0.372093	0.419355	0.466667	0.277778	0.387097	0.48	0.310345	0.240741	0.5	0.361111	0.351351	0.142857	0.36	0.304348	0.236842	0.266667
BLCA_M1255	1	0.214286	0.292683	0.190476	0.333333	0.25	0.266667	0.321429	0.470588	0.409091	0.380952	0.21875	0.333333	0.387097	0.37931	0.333333	0.318182	0.269231	0.318182	0.32	0.266667	0.18	0.391304	0.375	0.2	0.411765	0.257143	0.0967742	0.363636	0.2	0.190476	0.208333
BLCA_M132	1	0.901639	0.603175	0.15873	0.71875	0.549296	0.793651	0.410448	0.888889	0.4375	0.709677	0.403226	0.333333	0.467742	0.672131	0.645161	0.578125	0.625	0.365079	0.375	0.590909	0.35443	0.311475	0.57971	0.459016	0.444444	0.508197	0.492958	0.258065	0.180328	0.253521	0.434783
BLCA_M556	1	0.789474	0.705882	0.191489	0.714286	0.371429	0.736842	0.510638	0.779661	0.529412	0.672727	0.489796	0.404255	0.571429	0.76	0.795918	0.673077	0.554217	0.44	0.45098	0.685185	0.409091	0.404255	0.583333	0.458333	0.54	0.591837	0.373134	0.333333	0.234043	0.271186	0.491228
BLCA_M557	1	0.263158	0.26087	0.08	0.238095	0.26087	0.318182	0.185185	0.37037	0.0625	0.227273	0.0666667	0.3	0.428571	0.0566038	0.526316	0.35	0.368421	0.107143	0.0930233	0.0350877	0.12	0.16	0.111111	0.5	0.227273	0.125	0.227273	0.411765	0.272727	0.0487805	0.0535714
BRCA_M116	0.333333	1	0.315789	0.0952381	0.375	0.272727	0.470588	0.178571	0.375	0.0681818	0.15	0.0277778	0.375	0.3	0.0555556	0.388889	0.4375	0.264706	0.0416667	0.102564	0.0454545	0.0515464	0.190476	0.0697674	0.258065	0.15	0.108108	0.25	0.25	0.2	0.047619	0.05
BRCA_M19	0.901639	1	0.644068	0.169492	0.709677	0.514286	0.816667	0.421053	0.854839	0.466667	0.728814	0.431034	0.333333	0.5	0.719298	0.689655	0.616667	0.616279	0.389831	0.4	0.629032	0.355263	0.333333	0.590909	0.440678	0.474576	0.54386	0.457143	0.298246	0.172414	0.231884	0.461538
CESC_M183	0.26087	0.315789	1	0.0487805	0.421053	0.340909	0.304348	0.25	0.583333	0.106383	0.555556	0.0833333	0.35	0.409091	0.208333	0.384615	0.555556	0.371429	0.138889	0.132075	0.0526316	0.16	0.304348	0.159091	0.333333	0.166667	0.179487	0.341463	0.315789	0.45	0.0416667	0.125
CESC_M49	0.705882	0.644068	1	0.2	0.642857	0.28	0.649123	0.609756	0.833333	0.622222	0.611111	0.581395	0.487805	0.674419	0.693878	0.765957	0.782609	0.595238	0.395833	0.5	0.72	0.419355	0.487805	0.607143	0.511628	0.674419	0.586957	0.225352	0.404762	0.261905	0.320755	0.454545
CESC_M500	0.404255	0.310345	1	0.166667	0.5	0.433333	0.4375	0.451613	0.435897	0.368421	0.423077	0.424242	0.428571	0.457143	0.409091	0.464286	0.418605	0.413793	0.37037	0.411765	0.354167	0.264151	0.481481	0.464286	0.517241	0.545455	0.485714	0.105263	0.52	0.28	0.324324	0.372093
COAD_M286	0.510204	0.448276	0.642857	0.205882	1	0.378378	0.5	0.766667	0.6	0.621622	0.5	0.617647	0.454545	0.638889	0.555556	0.590909	0.568182	0.588235	0.451613	0.6	0.553191	0.363636	0.6	0.53125	0.485714	0.552632	0.538462	0.138462	0.533333	0.333333	0.390244	0.425532
COAD_M287	0.322581	0.3	0.37037	0.185185	1	0.375	0.275862	0.40625	0.363636	0.125	0.416667	0.113636	0.259259	0.407407	0.207547	0.264706	0.346154	0.447368	0.230769	0.175439	0.208333	0.0967742	0.307692	0.20339	0.342105	0.104167	0.173913	0.387755	0.1875	0.2	0.0408163	0.173077
COAD_M554	0.294118	0.375	0.421053	0.047619	1	0.272727	0.285714	0.25	0.4	0.0888889	0.315789	0.0454545	0.411765	0.473684	0.111111	0.375	0.470588	0.333333	0.0555556	0.125	0.0754717	0.0833333	0.35	0.142857	0.205882	0.136364	0.131579	0.3	0.157895	0.3	0.0155039	0.0851064
COAD_M61	0.71875	0.709677	0.625	0.176471	1	0.408451	0.716667	0.470588	0.758065	0.54717	0.684211	0.509804	0.4	0.528302	0.642857	0.672727	0.596491	0.528736	0.357143	0.471698	0.637931	0.366197	0.372549	0.622951	0.37037	0.472727	0.54717	0.411765	0.333333	0.215686	0.295082	0.483333
DLBC_M106	0.254545	0.19697	0.433333	0.151515	0.378378	1	0.25641	0.37931	0.311111	0.27907	0.290323	0.351351	0.34375	0.366667	0.275	0.296296	0.290323	0.333333	0.290323	0.307692	0.297297	0.22807	0.34375	0.333333	0.342857	0.285714	0.341463	0.097561	0.366667	0.296296	0.268293	0.290323
DLBC_M1201	0.333333	0.333333	0.236842	0.166667	0.35	1	0.27027	0.38	0.28169	0.103448	0.270833	0.0925926	0.189189	0.371429	0.193548	0.292683	0.25	0.382979	0.183673	0.177215	0.166667	0.128205	0.257143	0.192982	0.355556	0.184211	0.188679	0.418182	0.245902	0.0952381	0.0243902	0.126984
DLBC_M491	0.464789	0.428571	0.340909	0.0754717	0.375	1	0.366197	0.424242	0.430556	0.151515	0.351852	0.109375	0.217391	0.363636	0.283582	0.382979	0.295455	0.480769	0.186441	0.179775	0.202703	0.1375	0.204082	0.25	0.431373	0.163265	0.190476	0.555556	0.239437	0.208333	0.0384615	0.185714
DLBC_M67	0.549296	0.514286	0.3	0.145455	0.408451	1	0.450704	0.428571	0.513889	0.242424	0.432836	0.184615	0.215686	0.32	0.373134	0.365385	0.26	0.509091	0.225806	0.181818	0.266667	0.154762	0.25	0.30303	0.436364	0.191176	0.242424	0.57377	0.236842	0.207547	0.0972222	0.236111
ESCA_M451	0.5	0.464286	0.456522	0.181818	0.5	0.25641	1	0.457143	0.47619	0.567568	0.469388	0.514286	0.4375	0.425	0.545455	0.446809	0.456522	0.46875	0.387097	0.542857	0.42	0.327273	0.393939	0.512195	0.470588	0.540541	0.526316	0.220339	0.517241	0.151515	0.309524	0.444444
ESCA_M452	0.25	0.172414	0.261905	0.222222	0.212121	0.181818	1	0.233333	0.263158	0.128205	0.217391	0.15	0.190476	0.2	0.212121	0.692308	0.232558	0.310345	0.571429	0.0810811	0.263158	0.24	0.230769	0.470588	0.16129	0.131579	0.128205	0.0740741	0.692308	0.333333	0.0869565	0.115385
ESCA_M453	0.318182	0.470588	0.304348	0.0869565	0.285714	0.27451	1	0.225806	0.461538	0.0681818	0.217391	0.105263	0.35	0.409091	0.14	0.333333	0.4	0.411765	0.103448	0.132075	0.111111	0.08	0.2	0.186047	0.294118	0.217391	0.119048	0.25	0.388889	0.16	0.0769231	0.08
ESCA_M72	0.793651	0.816667	0.649123	0.166667	0.716667	0.450704	1	0.444444	0.806452	0.517857	0.706897	0.481481	0.377358	0.5	0.696429	0.637931	0.62069	0.6	0.385965	0.446429	0.633333	0.369863	0.351852	0.619048	0.4	0.5	0.545455	0.394366	0.314815	0.203704	0.28125	0.460317
GBM_M1260	0.458333	0.280702	0.423077	0.142857	0.5	0.37931	0.34375	1	0.472222	0.361111	0.32	0.473684	0.37037	0.666667	0.404762	0.45	0.416667	0.653846	0.35	0.40625	0.472222	0.384615	0.608696	0.310345	0.64	0.371429	0.441176	0.0862069	0.346154	0.526316	0.352941	0.36
GBM_M1609	0.276923	0.253968	0.225806	0.222222	0.40625	0.395833	0.245902	1	0.277778	0.145833	0.368421	0.136364	0.206897	0.3	0.203704	0.294118	0.241379	0.473684	0.225	0.172414	0.192982	0.129032	0.296296	0.204082	0.3	0.08	0.173913	0.38	0.155172	0.121212	0.0645161	0.169811
GBM_M187	0.410448	0.390977	0.278195	0.0757576	0.356061	0.297101	0.358209	1	0.402985	0.219697	0.346154	0.2	0.20438	0.221374	0.315385	0.285714	0.259259	0.558824	0.174242	0.347518	0.279412	0.181208	0.155039	0.289855	0.19697	0.203008	0.248062	0.286765	0.300752	0.0846154	0.128571	0.226277
GBM_M687	0.341463	0.308642	0.25	0.111111	0.333333	0.428571	0.256098	1	0.351852	0.123288	0.316667	0.1	0.192308	0.269231	0.210526	0.314815	0.235294	0.45614	0.169231	0.21978	0.144578	0.0898876	0.181818	0.194444	0.274194	0.125	0.227273	0.432836	0.253333	0.207547	0.0533333	0.171053
GBM_M688	0.510638	0.421053	0.609756	0.266667	0.766667	0.371429	0.457143	1	0.648649	0.540541	0.5	0.575758	0.40625	0.69697	0.522727	0.595238	0.534884	0.758621	0.4	0.558824	0.555556	0.358491	0.607143	0.483871	0.53125	0.555556	0.5	0.126984	0.482759	0.37037	0.35	0.391304
HNSC_M1041	0.470588	0.232143	0.375	0.130435	0.413793	0.285714	0.344828	0.461538	1	0.333333	0.5	0.333333	0.269231	0.419355	0.411765	0.5625	0.428571	0.36	0.5	0.28125	0.288889	0.176471	0.375	0.416667	0.275862	0.388889	0.323529	0.09375	0.47619	0.136364	0.166667	0.209302
HNSC_M425	0.708333	0.586207	0.833333	0.210526	0.6	0.311111	0.561404	0.648649	1	0.581395	0.54717	0.575	0.513514	0.634146	0.625	0.772727	0.75	0.631579	0.44186	0.488372	0.723404	0.482143	0.473684	0.545455	0.538462	0.595238	0.581395	0.205882	0.459459	0.297297	0.326531	0.415094
HNSC_M426	0.37037	0.375	0.583333	0.0588235	0.4	0.431373	0.461538	0.351852	1	0.111111	0.44	0.0930233	0.296296	0.392857	0.203704	0.517241	0.5	0.513514	0.113636	0.12	0.0793651	0.15625	0.357143	0.229167	0.368421	0.241379	0.148936	0.465116	0.32	0.423077	0.04	0.169811
HNSC_M84	0.888889	0.854839	0.639344	0.142857	0.758065	0.513889	0.806452	0.423729	1	0.467742	0.721311	0.433333	0.338983	0.5	0.683333	0.683333	0.587302	0.651163	0.393443	0.403226	0.6	0.376623	0.338983	0.61194	0.419355	0.47541	0.542373	0.478873	0.305085	0.183333	0.257143	0.462687
KICH_M1085	0.409091	0.315789	0.428571	0.185185	0.516129	0.272727	0.451613	0.466667	0.410256	1	0.5	0.533333	0.454545	0.470588	0.46875	0.428571	0.384615	0.37931	0.44	0.6	0.391304	0.269231	0.444444	0.481481	0.30303	0.428571	0.416667	0.12069	0.48	0.24	0.371429	0.288889
KICH_M400	0.529412	0.466667	0.622222	0.184211	0.621622	0.27907	0.567568	0.540541	0.581395	1	0.529412	0.638889	0.529412	0.615385	0.608696	0.574468	0.553191	0.432432	0.4	0.621622	0.571429	0.362069	0.485714	0.511111	0.4	0.575	0.6	0.238095	0.470588	0.222222	0.355556	0.479167
KIRC_M401	0.435484	0.440678	0.375	0.105263	0.436364	0.385965	0.438596	0.368421	0.466667	0.270833	1	0.244444	0.25641	0.323529	0.482759	0.392157	0.322581	0.409091	0.571429	0.163265	0.326531	0.206349	0.28125	0.344828	0.325	0.22449	0.326087	0.442308	0.285714	0.228571	0.115385	0.333333
KIRC_M402	0.380952	0.303571	0.423077	0.2	0.5	0.290323	0.34375	0.5	0.5	0.5	1	0.419355	0.321429	0.5	0.5	0.652174	0.380952	0.407407	0.7	0.407407	0.377778	0.185185	0.37037	0.461538	0.242424	0.411765	0.361111	0.114286	0.521739	0.16	0.304348	0.272727
KIRC_M92	0.709677	0.728814	0.611111	0.18	0.684211	0.432836	0.706897	0.44898	0.721311	0.529412	1	0.489796	0.404255	0.480769	0.692308	0.660377	0.581818	0.5	0.44	0.396226	0.596491	0.328571	0.346939	0.610169	0.428571	0.480769	0.56	0.393939	0.333333	0.183673	0.271186	0.517857
KIRC_M980	0.36	0.263158	0.325581	0.368421	0.32	0.178571	0.277778	0.32	0.368421	0.297297	1	0.34375	0.333333	0.259259	0.428571	0.35	0.473684	0.235294	0.615385	0.193548	0.405405	0.25	0.4	0.226415	0.37931	0.236842	0.297297	0.24	0.391304	0.166667	0.130435	0.195652
KIRC_M981	0.227273	0.189655	0.555556	0.0512821	0.315789	0.266667	0.217391	0.241379	0.44	0.138889	1	0.0882353	0.315789	0.26087	0.227273	0.259259	0.444444	0.277778	0.114286	0.115385	0.0357143	0.173913	0.272727	0.166667	0.235294	0.047619	0.1	0.232558	0.117647	0.35	0.0454545	0.181818
KIRP_M363	0.318182	0.175439	0.347826	0.235294	0.344828	0.315789	0.233333	0.473684	0.305556	0.264706	0.227273	1	0.409091	0.45	0.3	0.232558	0.272727	0.333333	0.217391	0.3	0.333333	0.304348	0.347826	0.230769	0.4	0.2	0.388889	0.0961538	0.26087	0.4375	0.333333	0.272727
KIRP_M61	0.489796	0.431034	0.581395	0.275862	0.617647	0.351351	0.514286	0.575758	0.575	0.638889	0.489796	1	0.566667	0.567568	0.533333	0.533333	0.545455	0.5	0.375	0.617647	0.565217	0.345455	0.424242	0.465116	0.5	0.526316	0.638889	0.196721	0.451613	0.258065	0.435897	0.466667
LGG_M1121	0.315789	0.210526	0.32	0.277778	0.322581	0.285714	0.258065	0.304348	0.324324	0.454545	0.255319	0.37931	1	0.47619	0.366667	0.315789	0.317073	0.21875	0.277778	0.411765	0.407407	0.230769	0.375	0.265306	0.275862	0.257143	0.363636	0.113208	0.291667	0.470588	0.272727	0.363636
LGG_M593	0.404255	0.333333	0.487805	0.178571	0.454545	0.34375	0.4375	0.40625	0.513514	0.529412	0.404255	0.566667	1	0.52	0.409091	0.409091	0.487805	0.366667	0.321429	0.454545	0.451613	0.288462	0.333333	0.366667	0.419355	0.416667	0.575758	0.178571	0.407407	0.333333	0.361111	0.340909
LGG_M598	0.375	0.375	0.35	0.0869565	0.411765	0.217391	0.35	0.206897	0.296296	0.0888889	0.315789	0.0454545	1	0.333333	0.0810811	0.35	0.388889	0.25	0.115385	0.125	0.0555556	0.0909091	0.227273	0.170732	0.242424	0.0357143	0.102564	0.238095	0.142857	0.238095	0.0512821	0.108696
LIHC_M140	0.428571	0.3	0.409091	0.181818	0.473684	0.371429	0.409091	0.3	0.392857	0.0666667	0.323529	0.102564	0.333333	1	0.137255	0.423077	0.526316	0.361111	0.166667	0.166667	0.150943	0.166667	0.272727	0.181818	0.3	0.16	0.146341	0.333333	0.3	0.2	0.0833333	0.1
LIHC_M487	0.333333	0.275862	0.407407	0.178571	0.393939	0.366667	0.333333	0.666667	0.459459	0.428571	0.306122	0.451613	0.52	1	0.395349	0.428571	0.458333	0.5	0.333333	0.45	0.535714	0.275862	0.583333	0.3	0.5	0.361111	0.470588	0.122807	0.333333	0.428571	0.342857	0.458333
LIHC_M488	0.352941	0.232143	0.285714	0.238095	0.322581	0.166667	0.222222	0.310345	0.3	0.28	0.428571	0.212121	0.137931	1	0.322581	0.416667	0.388889	0.214286	0.363636	0.28125	0.208333	0.0909091	0.4	0.324324	0.272727	0.257143	0.153846	0.104167	0.24	0.115385	0.181818	0.155556
LIHC_M88	0.571429	0.5	0.674419	0.222222	0.638889	0.35	0.5	0.69697	0.634146	0.615385	0.5	0.567568	0.5	1	0.638889	0.625	0.6	0.575758	0.411765	0.594595	0.55102	0.322034	0.545455	0.509434	0.410256	0.55	0.536585	0.184615	0.441176	0.264706	0.363636	0.428571
LUAD_M375	0.391304	0.25	0.208333	0.142857	0.207547	0.207547	0.333333	0.192308	0.237288	0.210526	0.482759	0.205882	0.172414	0.142857	1	0.470588	0.368421	0.205128	0.5625	0.166667	0.190476	0.178571	0.3	0.190476	0.357143	0.25	0.277778	0.22449	0.2	0.166667	0.102564	0.261905
LUAD_M376	0.541667	0.473684	0.568182	0.151515	0.513514	0.275	0.472727	0.514286	0.52381	0.5	0.5	0.447368	0.371429	0.638889	1	0.458333	0.533333	0.421053	0.451613	0.473684	0.553191	0.271186	0.5	0.480769	0.3	0.340909	0.463415	0.174603	0.352941	0.333333	0.295455	0.288462
LUAD_M901	0.352941	0.196429	0.409091	0.238095	0.3	0.259259	0.321429	0.333333	0.411765	0.428571	0.473684	0.266667	0.333333	0.380952	1	0.642857	0.647059	0.333333	0.4	0.375	0.241379	0.16	0.6	0.391304	0.25	0.3125	0.264706	0.1	0.45	0.277778	0.25	0.272727
LUAD_M94	0.76	0.719298	0.693878	0.181818	0.642857	0.373134	0.696429	0.522727	0.683333	0.608696	0.692308	0.533333	0.409091	0.586957	1	0.68	0.693878	0.488095	0.446809	0.521739	0.641509	0.369231	0.47619	0.596491	0.5	0.489796	0.644444	0.333333	0.333333	0.255814	0.314815	0.472727
LUSC_M1318	0.333333	0.214286	0.454545	0.227273	0.37931	0.296296	0.407407	0.45	0.5625	0.409091	0.526316	0.344828	0.315789	0.428571	0.642857	1	0.526316	0.434783	0.45	0.375	0.297297	0.204082	0.666667	0.434783	0.333333	0.5	0.294118	0.133333	0.5	0.263158	0.242424	0.318182
LUSC_M143	0.795918	0.689655	0.765957	0.181818	0.672727	0.277778	0.637931	0.595238	0.772727	0.574468	0.660377	0.533333	0.409091	0.622222	0.68	1	0.693878	0.545455	0.446809	0.458333	0.673077	0.412698	0.47619	0.596491	0.434783	0.659091	0.541667	0.294118	0.363636	0.255814	0.290909	0.5
LUSC_M172	0.521739	0.347826	0.384615	0.0625	0.375	0.382979	0.333333	0.314815	0.517241	0.0571429	0.259259	0.0465116	0.32	0.423077	0.145455	1	0.307692	0.421053	0.117647	0.102041	0.0819672	0.129032	0.285714	0.14	0.347826	0.36	0.130435	0.326087	0.291667	0.346154	0.0416667	0.0714286
LUSC_M577	0.395833	0.375	0.47619	0.172414	0.53125	0.294118	0.424242	0.586207	0.545455	0.432432	0.652174	0.454545	0.322581	0.625	0.52381	1	0.461538	0.5	0.52	0.441176	0.375	0.214286	0.478261	0.5	0.323529	0.575758	0.394737	0.102564	0.56	0.178571	0.282051	0.363636
LUSC_M578	0.212766	0.175439	0.155556	0.235294	0.3125	0.173077	0.233333	0.172414	0.166667	0.194444	0.35	0.1875	0.148148	0.125	0.470588	1	0.277778	0.189189	0.294118	0.147059	0.146341	0.210526	0.4375	0.175	0.166667	0.2	0.194444	0.212766	0.173913	0.0869565	0.105263	0.190476
LUSC_M579	0.272727	0.157895	0.214286	0.25	0.176471	0.142857	0.692308	0.227273	0.277778	0.105263	0.3	0.166667	0.210526	0.217391	0.1875	1	0.222222	0.241379	0.666667	0.0555556	0.277778	0.26087	0.2	0.533333	0.147059	0.0789474	0.105263	0.0769231	0.538462	0.375	0.0952381	0.125
LUSC_M637	0.526316	0.388889	0.304348	0.0769231	0.285714	0.282609	0.304348	0.226415	0.357143	0.0612245	0.166667	0.05	0.35	0.347826	0.131579	1	0.217391	0.35	0.142857	0.0909091	0.0714286	0.0740741	0.2	0.133333	0.470588	0.333333	0.0930233	0.25	0.388889	0.26087	0.037037	0.0588235
MESO_M1728	0.673077	0.616667	0.782609	0.186047	0.596491	0.28	0.62069	0.534884	0.75	0.553191	0.581818	0.545455	0.487805	0.6	0.693878	0.693878	1	0.488889	0.395833	0.468085	0.653846	0.375	0.418605	0.578947	0.477273	0.531915	0.586957	0.208333	0.372093	0.261905	0.320755	0.428571
MESO_M1861	0.318182	0.280702	0.380952	0.185185	0.363636	0.291667	0.30303	0.416667	0.432432	0.384615	0.36	0.333333	0.304348	0.458333	0.647059	0.526316	1	0.433333	0.307692	0.323529	0.4	0.207547	0.578947	0.357143	0.322581	0.371429	0.324324	0.0833333	0.4	0.318182	0.243243	0.307692
MESO_M1862	0.304348	0.152542	0.204545	0.222222	0.294118	0.128205	0.2	0.208333	0.230769	0.189189	0.473684	0.181818	0.230769	0.153846	0.368421	0.277778	1	0.151515	0.310345	0.210526	0.230769	0.24	0.263158	0.190476	0.2	0.162162	0.157895	0.137255	0.4	0.142857	0.108108	0.16
MESO_M288	0.352941	0.4375	0.555556	0.0833333	0.470588	0.295455	0.4	0.241379	0.5	0.111111	0.444444	0.0277778	0.388889	0.526316	0.125	0.307692	1	0.388889	0.12	0.137255	0.0652174	0.173913	0.217391	0.113636	0.277778	0.0833333	0.157895	0.325	0.277778	0.35	0.0416667	0.106383
OV_M1302	0.367347	0.327586	0.47619	0.214286	0.53125	0.333333	0.46875	0.703704	0.5	0.432432	0.407407	0.5	0.366667	0.575758	0.4	0.5	0.377778	1	0.310345	0.484848	0.404255	0.283019	0.518519	0.4	0.551724	0.529412	0.432432	0.116667	0.444444	0.269231	0.351351	0.363636
OV_M347	0.625	0.616279	0.47619	0.107143	0.528736	0.4	0.6	0.558824	0.651163	0.337209	0.5	0.309524	0.240964	0.357143	0.488095	0.470588	0.44186	1	0.267442	0.290698	0.454545	0.287129	0.240964	0.419355	0.289157	0.325581	0.385542	0.34375	0.295918	0.130952	0.191489	0.326087
OV_M676	0.469388	0.413793	0.595238	0.181818	0.588235	0.324324	0.436364	0.758621	0.631579	0.414634	0.358491	0.472222	0.352941	0.540541	0.446809	0.545455	0.488889	1	0.3	0.421053	0.512195	0.363636	0.533333	0.388889	0.5625	0.540541	0.414634	0.125	0.375	0.357143	0.309524	0.326531
OV_M677	0.5	0.483333	0.371429	0.162162	0.447368	0.509091	0.457627	0.473684	0.513514	0.226415	0.436364	0.176471	0.25	0.361111	0.363636	0.421053	0.314286	1	0.229167	0.173077	0.258065	0.153846	0.297297	0.301887	0.44186	0.210526	0.3	0.410714	0.194444	0.27027	0.0877193	0.241379
PAAD_M1165	0.318182	0.175439	0.181818	0.166667	0.150943	0.150943	0.321429	0.166667	0.175	0.194444	0.421053	0.225806	0.192308	0.16	0.5625	0.294118	0.210526	0.157895	1	0.147059	0.175	0.15	0.277778	0.146341	0.4	0.2	0.264706	0.163265	0.125	0.136364	0.166667	0.190476
PAAD_M1166	0.270833	0.224138	0.244444	0.315789	0.25	0.146341	0.421053	0.28	0.307692	0.146341	0.347826	0.166667	0.272727	0.269231	0.23913	0.5625	0.244444	0.242424	1	0.130435	0.342105	0.259259	0.25	0.4	0.189189	0.15	0.175	0.12963	0.409091	0.35	0.12	0.142857
PAAD_M1449	0.272727	0.157895	0.243902	0.25	0.1875	0.142857	0.571429	0.35	0.277778	0.135135	0.238095	0.166667	0.277778	0.333333	0.266667	0.666667	0.243902	0.285714	1	0.105263	0.277778	0.26087	0.304348	0.533333	0.214286	0.108108	0.166667	0.0571429	0.444444	0.466667	0.15	0.173913
PAAD_M546	0.318182	0.303571	0.37037	0.25	0.451613	0.290323	0.387097	0.4	0.5	0.44	0.7	0.375	0.321429	0.411765	0.451613	0.52	0.348837	0.310345	1	0.40625	0.347826	0.185185	0.304348	0.461538	0.210526	0.333333	0.361111	0.114286	0.590909	0.16	0.277778	0.302326
PAAD_M565	0.466667	0.389831	0.395833	0.333333	0.357143	0.225806	0.385965	0.34375	0.44186	0.288889	0.615385	0.325	0.314286	0.333333	0.446809	0.446809	0.395833	0.3	1	0.2	0.47619	0.285714	0.277778	0.315789	0.470588	0.295455	0.380952	0.263158	0.4	0.225806	0.145833	0.25
PCPG_M100	0.45098	0.4	0.5	0.205882	0.6	0.307692	0.542857	0.558824	0.488372	0.621622	0.40625	0.617647	0.454545	0.594595	0.521739	0.458333	0.468085	0.484848	0.40625	1	0.489796	0.315789	0.454545	0.488372	0.368421	0.512821	0.538462	0.15625	0.533333	0.212121	0.425	0.425532
PCPG_M1149	0.26087	0.155172	0.291667	0.181818	0.258065	0.315789	0.321429	0.4	0.27027	0.363636	0.272727	0.357143	0.411765	0.45	0.375	0.352941	0.272727	0.333333	0.217391	1	0.384615	0.25	0.411765	0.230769	0.296296	0.3125	0.30303	0.1	0.26087	0.277778	0.3125	0.272727
PCPG_M489	0.32	0.283333	0.409091	0.172414	0.484848	0.222222	0.46875	0.4375	0.390244	0.6	0.407407	0.5	0.413793	0.444444	0.4	0.4	0.347826	0.448276	0.310345	1	0.375	0.259259	0.464286	0.4	0.323529	0.485714	0.394737	0.116667	0.392857	0.178571	0.351351	0.304348
PRAD_M1040	0.387097	0.306452	0.404255	0.206897	0.358974	0.297297	0.344828	0.448276	0.452381	0.390244	0.267857	0.444444	0.451613	0.535714	0.367347	0.395833	0.404255	0.416667	0.307692	0.394737	1	0.309091	0.40625	0.277778	0.4	0.4	0.461538	0.145161	0.30303	0.321429	0.317073	0.4
PRAD_M259	0.685185	0.629032	0.72	0.195652	0.637931	0.266667	0.633333	0.555556	0.723404	0.571429	0.596491	0.565217	0.444444	0.55102	0.641509	0.673077	0.653846	0.510638	0.392157	0.489796	1	0.393939	0.413043	0.540984	0.408163	0.52	0.571429	0.246575	0.369565	0.23913	0.298246	0.4
PRAD_M614	0.576923	0.483871	0.571429	0.243243	0.508772	0.255319	0.483333	0.472222	0.636364	0.446809	0.464286	0.536585	0.4	0.459459	0.529412	0.591837	0.54	0.512195	0.47619	0.361702	1	0.383333	0.435897	0.416667	0.463415	0.456522	0.478261	0.242424	0.368421	0.297297	0.27451	0.363636
READ_M482	0.48	0.190476	0.276596	0.16	0.236842	0.178571	0.24	0.384615	0.309524	0.1875	0.25	0.304348	0.258065	0.275862	0.244898	0.26087	0.25	0.363636	0.285714	0.25	0.294118	1	0.258065	0.230769	0.34375	0.190476	0.243902	0.0833333	0.346154	0.347826	0.170732	0.16
READ_M68	0.409091	0.355263	0.419355	0.14	0.366197	0.22807	0.369863	0.358491	0.482143	0.362069	0.328571	0.345455	0.288462	0.322034	0.369231	0.412698	0.375	0.351852	0.280702	0.315789	0.393939	1	0.313725	0.315068	0.339623	0.344828	0.362069	0.1625	0.25	0.229167	0.225806	0.283582
SARC_M237	0.404255	0.333333	0.487805	0.166667	0.6	0.34375	0.393939	0.608696	0.473684	0.485714	0.37037	0.424242	0.375	0.583333	0.5	0.52381	0.48	0.533333	0.304348	0.464286	0.435897	0.313725	1	0.38	0.517241	0.457143	0.444444	0.118644	0.357143	0.454545	0.289474	0.37037
SARC_M258	0.234043	0.192982	0.173913	0.294118	0.307692	0.257143	0.1875	0.296296	0.183333	0.128205	0.4	0.21875	0.185185	0.272727	0.3	0.4375	0.263158	0.25	0.277778	0.111111	0.230769	0.2	1	0.142857	0.16129	0.131579	0.189189	0.234043	0.12	0.0571429	0.1	0.16
SARC_M758	0.315789	0.232143	0.434783	0.217391	0.413793	0.285714	0.392857	0.5	0.368421	0.391304	0.363636	0.333333	0.3	0.55	0.6	0.666667	0.578947	0.478261	0.304348	0.416667	0.357143	0.22449	1	0.416667	0.37037	0.388889	0.323529	0.09375	0.409091	0.315789	0.277778	0.363636
SKCM_M1119	0.375	0.327586	0.464286	0.214286	0.53125	0.333333	0.46875	0.483871	0.461538	0.481481	0.461538	0.454545	0.366667	0.444444	0.391304	0.5	0.377778	0.4	0.461538	0.484848	0.375	0.259259	0.416667	1	0.363636	0.485714	0.432432	0.116667	0.695652	0.178571	0.351351	0.363636
SKCM_M408	0.5	0.533333	0.509804	0.166667	0.535714	0.30303	0.534483	0.418605	0.532258	0.511111	0.576923	0.465116	0.333333	0.488889	0.529412	0.5	0.480769	0.357143	0.432432	0.488372	0.446429	0.238806	0.333333	1	0.333333	0.55814	0.478261	0.28125	0.459459	0.116279	0.27451	0.470588
SKCM_M409	0.192308	0.112903	0.173913	0.210526	0.15	0.125	0.470588	0.2	0.195122	0.097561	0.208333	0.142857	0.181818	0.192308	0.171429	0.533333	0.190476	0.181818	0.533333	0.0512821	0.195122	0.230769	0.178571	1	0.121212	0.047619	0.097561	0.0535714	0.380952	0.315789	0.0833333	0.111111
SKCM_M59	0.583333	0.590909	0.607143	0.127273	0.622951	0.285714	0.619048	0.45098	0.61194	0.5	0.610169	0.433962	0.352941	0.509434	0.596491	0.596491	0.578947	0.419355	0.32	0.425926	0.540984	0.315068	0.38	1	0.351852	0.481481	0.472727	0.283784	0.34	0.22	0.258065	0.442623
STAD_M335	0.5	0.157895	0.315789	0.0952381	0.157895	0.2	0.25	0.132075	0.269231	0.0681818	0.210526	0.0277778	0.222222	0.3	0.0612245	0.470588	0.277778	0.294118	0.125	0.0784314	0.0377358	0.05	0.0869565	0.0952381	1	0.0512821	0.0789474	0.190476	0.125	0.263158	0	0.0652174
STAD_M47	0.459016	0.440678	0.333333	0.135135	0.362069	0.436364	0.389831	0.3	0.419355	0.22	0.363636	0.166667	0.242424	0.272727	0.245614	0.314815	0.272727	0.44186	0.210526	0.1875	0.275862	0.134328	0.222222	0.326531	1	0.25	0.132075	0.38	0.3	0.194444	0.0740741	0.172414
STAD_M48	0.5	0.37931	0.517241	0.214286	0.485714	0.342857	0.470588	0.64	0.538462	0.4	0.428571	0.5	0.419355	0.5	0.5	0.434783	0.477273	0.5625	0.470588	0.368421	0.463415	0.34375	0.517241	0.363636	1	0.447368	0.6	0.166667	0.4	0.333333	0.325	0.4
TGCT_M176	0.54	0.474576	0.674419	0.189189	0.552632	0.285714	0.540541	0.555556	0.595238	0.575	0.480769	0.526316	0.416667	0.55	0.489796	0.659091	0.531915	0.540541	0.333333	0.512821	0.52	0.344828	0.457143	0.55814	0.447368	1	0.5	0.203125	0.441176	0.162162	0.304348	0.458333
TGCT_M690	0.411765	0.192982	0.333333	0.136364	0.37931	0.206897	0.407407	0.321429	0.388889	0.333333	0.318182	0.258065	0.142857	0.30303	0.277778	0.5	0.26087	0.32	0.26087	0.32	0.212766	0.18	0.391304	0.375	0.241379	1	0.222222	0.0967742	0.363636	0.12	0.190476	0.26087
THCA_M312	0.591837	0.54386	0.586957	0.235294	0.54717	0.341463	0.545455	0.5	0.581395	0.6	0.56	0.638889	0.575758	0.536585	0.644444	0.541667	0.586957	0.432432	0.380952	0.538462	0.571429	0.362069	0.444444	0.478261	0.6	0.5	1	0.238095	0.470588	0.257143	0.386364	0.510638
THYM_M385	0.408451	0.371429	0.341463	0.06	0.377778	0.555556	0.309859	0.428571	0.465116	0.142857	0.352941	0.116667	0.238095	0.333333	0.242424	0.326087	0.325	0.403846	0.178571	0.188235	0.164384	0.106383	0.209302	0.266667	0.38	0.145161	0.20339	1	0.235294	0.227273	0.0298507	0.19697
THYM_M66	0.492958	0.457143	0.297872	0.142857	0.411765	0.57377	0.394366	0.432836	0.478873	0.238095	0.442308	0.196721	0.208333	0.319149	0.333333	0.294118	0.282609	0.410714	0.263158	0.175824	0.246575	0.1625	0.234043	0.283784	0.363636	0.203125	0.238095	1	0.216216	0.2	0.0980392	0.268657
UCEC_M180	0.36	0.241379	0.357143	0.3	0.3	0.137931	0.647059	0.28125	0.368421	0.263158	0.391304	0.228571	0.241379	0.259259	0.288889	0.348837	0.4	0.354839	0.444444	0.193548	0.368421	0.346154	0.285714	0.380952	0.212121	0.236842	0.2	0.169811	1	0.272727	0.097561	0.170213
UCEC_M189	0.363636	0.298246	0.52	0.192308	0.533333	0.366667	0.517241	0.482759	0.47619	0.48	0.521739	0.451613	0.407407	0.441176	0.45	0.56	0.4	0.444444	0.590909	0.533333	0.369565	0.25	0.409091	0.695652	0.4	0.441176	0.470588	0.111111	1	0.2	0.342857	0.357143
UCEC_M627	0.272727	0.137931	0.214286	0.176471	0.225806	0.142857	0.692308	0.25	0.210526	0.115385	0.181818	0.166667	0.0952381	0.138889	0.1875	0.538462	0.173913	0.333333	0.315789	0.117647	0.210526	0.26087	0.25	0.352941	0.133333	0.138889	0.0769231	0.0571429	1	0.294118	0.0952381	0.08
UCEC_M829	0.411765	0.25	0.315789	0.0952381	0.157895	0.2	0.388889	0.132075	0.32	0.0930233	0.166667	0.0571429	0.0454545	0.3	0.130435	0.388889	0.277778	0.194444	0.173913	0.0784314	0.0576923	0.0909091	0.190476	0.179487	0.3	0.0512821	0.0512821	0.190476	1	0.04	0.0454545	0.0888889
UCS_M209	0.304348	0.172414	0.28	0.222222	0.333333	0.3	0.333333	0.526316	0.297297	0.24	0.183673	0.4375	0.470588	0.428571	0.333333	0.375	0.318182	0.357143	0.466667	0.277778	0.321429	0.347826	0.454545	0.315789	0.333333	0.162162	0.257143	0.0833333	0.294118	1	0.25	0.318182
UCS_M386	0.333333	0.2	0.45	0.0384615	0.3	0.208333	0.16	0.207547	0.423077	0.0851064	0.35	0.0857143	0.238095	0.2	0.166667	0.346154	0.35	0.368421	0.136364	0.0681818	0.0357143	0.166667	0.26087	0.111111	0.263158	0.125	0.097561	0.227273	0.0740741	1	0.0434783	0.104167
UVM_M268	0.271186	0.231884	0.324324	0.135135	0.390244	0.268293	0.309524	0.352941	0.326531	0.371429	0.277778	0.435897	0.361111	0.363636	0.314815	0.290909	0.320755	0.351351	0.277778	0.425	0.317073	0.225806	0.289474	0.351351	0.325	0.304348	0.386364	0.0869565	0.342857	0.205882	1	0.283019
BLCA_M1259	1	0.333333	0.25	0.0952381	0.294118	0.2	0.190476	0.176471	0.32	0.0681818	0.210526	0.037037	0.375	0.368421	0	0.409091	0.352941	0.294118	0.0384615	0.102564	0.0243902	0.0909091	0.136364	0.0697674	0.428571	0.15	0.138889	0.219512	0.25	0.333333	0.0526316	0.05
ACC_M1441	0.5	0.47619	0.235294	0.307692	0.45	0.115385	0.352941	0.333333	0.107143	0.45	0.0860215	0.375	0.0769231	0.571429	0.615385	0.368421	0.294118	0.409091	0.0526316	0.0666667	0.333333	0.133333	0.411765	0.181818	0.0676692	0.151515	0.529412	0.304348	0.5	0.277778	0.166667	1
ACC_M1443	0.368421	0.5	0	0.333333	0.3125	0.0526316	0.4375	0.0357143	0.0333333	0.047619	0.5	0.4375	0.0344828	0.388889	0.388889	0.411765	0.4375	0.388889	0.08	0.0454545	0.315789	0.0851064	0.190476	0.333333	0.0454545	0.0857143	0	0.4375	0.4375	0.0526316	0.238095	1
ACC_M151	0.744681	0.395833	0.23913	0.306122	0.382979	0.0491803	0.327273	0.217391	0.116667	0.27451	0.23913	0.369565	0.0477816	0.553846	0.326087	0.347826	0.26087	0.686275	0.0588235	0.0461538	0.680851	0.318182	0.304348	0.527273	0.0920245	0.317647	0.319149	0.269231	0.375	0.156863	0.280702	1
ACC_M722	0.681818	0.652174	0.4	0.464286	0.565217	0.0909091	0.5	0.421053	0.151515	0.5	0.08	0.545455	0.0606061	0.625	0.555556	0.571429	0.45	0.52	0.0434783	0.0833333	0.521739	0.208333	0.631579	0.375	0.0797101	0.220588	0.65	0.423077	0.681818	0.25	0.4	1
ACC_M723	0.551724	0.37931	0.0810811	0.46875	0.333333	0.0681818	0.4	0.0540541	0.11215	0.0652174	0.37931	0.448276	0.04375	0.517241	0.517241	0.482759	0.4	0.5	0.0735294	0.0243902	0.517241	0.186441	0.375	0.425532	0.0540541	0.144578	0.0465116	0.4	0.448276	0.0833333	0.166667	1
BLCA_M162	1	0.461538	0.305556	0.395349	0.447368	0.0576923	0.4	0.277778	0.14	0.341463	0.305556	0.432432	0.04947	0.625	0.416667	0.444444	0.333333	0.9	0.0666667	0.0545455	0.916667	0.375	0.388889	0.608696	0.0909091	0.342105	0.405405	0.333333	0.473684	0.195122	0.340426	0.744681
BLCA_M682	1	0.6875	0.0517241	0.789474	0.588235	0.0638298	0.705882	0.0375	0.0927835	0.0666667	0.6875	0.8125	0.033557	0.9375	0.9375	0.875	0.705882	0.842105	0.0909091	0.025641	0.9375	0.163265	0.631579	0.652174	0	0.108108	0.0392157	0.705882	0.8125	0.125	0.230769	0.551724
BLCA_M683	1	0.782609	0.55	0.62963	0.772727	0.0833333	0.65	0.5	0.205882	0.56	0.0882353	0.761905	0.0555556	0.75	0.55	0.8	0.6	0.782609	0.0421053	0.0769231	0.809524	0.270833	0.7	0.565217	0.101449	0.264706	0.714286	0.538462	0.818182	0.32	0.409091	0.681818
BRCA_M206	0.6875	1	0	0.611111	0.571429	0.047619	0.846154	0.04	0.0520833	0.0491071	1	0.846154	0.010582	0.733333	0.733333	0.785714	0.846154	0.733333	0.1	0.0434783	0.625	0.130435	0.444444	0.5	0	0.115942	0	0.714286	0.846154	0.1	0.285714	0.5
BRCA_M342	0.391304	1	0.151515	0.241379	0.409091	0.0416667	0.21875	0.222222	0.1	0.291667	0.0510204	0.318182	0.0186567	0.5	0.4375	0.272727	0.2	0.32	0.047619	0.0481928	0.25	0.166667	0.3	0.217391	0.0666667	0.130435	0.4	0.210526	0.454545	0.136364	0.15	0.466667
BRCA_M51	0.782609	1	0.52381	0.551724	0.818182	0.0810811	0.619048	0.47619	0.2	0.538462	0.0873786	0.727273	0.0540541	0.791667	0.52381	0.681818	0.571429	0.615385	0.0416667	0.075	0.625	0.265306	0.666667	0.541667	0.100719	0.26087	0.761905	0.518519	0.863636	0.307692	0.391304	0.652174
BRCA_M58	0.0625	1	0.625	0.458333	0.03125	0.52381	0.555556	0.04	0.529412	0.545455	0.0689655	0.0810811	0.0697674	0.777778	0.764706	0.0490798	0.411765	0.470588	0.0857143	0.0416667	0.444444	0.0666667	0.0833333	0.0681818	0.6	0.0731707	0.0714286	0.0555556	0.631579	0.411765	0.03125	0.0645161
CESC_M1035	0.55	0.52381	1	0.458333	0.615385	0.047619	0.846154	0.615385	0.230769	0.428571	0.0408163	0.555556	0.0740741	0.5	0.294118	0.6875	0.642857	0.5	0.0359281	0.1	0.611111	0.209302	0.5625	0.588235	0.0697674	0.166667	0.588235	0.55	0.55	0.411765	0.466667	0.4
CESC_M636	0.0394737	0.625	1	0.375	0.0124481	0.428571	0.529412	0.0240964	0.5	0.52381	0.0555556	0.0379747	0.0731707	0.733333	0.647059	0.0496894	0.466667	0.642857	0.0909091	0.0454545	0.411765	0.0522388	0.0638298	0.0714286	0.692308	0.0769231	0.060241	0.15	0.526316	0.466667	0.08	0.0357143
CESC_M94	0.15	0.428571	1	0.382353	0.184211	0.466667	0.538462	0.039548	0.461538	0.586207	0.0526316	0.117647	0.0545455	0.517241	0.555556	0.122699	0.4375	0.615385	0.117647	0.046729	0.357143	0.0689655	0.0810811	0.0727273	0.384615	0.12	0.133333	0.233333	0.592593	0.257143	0.0833333	0.125
CHOL_M1241	0.789474	0.611111	0.05	1	0.526316	0.0612245	0.631579	0.0365854	0.0909091	0.0660793	0.611111	0.722222	0.0331126	0.833333	0.833333	0.777778	0.631579	0.681818	0.0877193	0.0333333	0.736842	0.156863	0.571429	0.6	0	0.105263	0.0377358	0.631579	0.722222	0.115385	0.214286	0.46875
CHOL_M363	0.0352941	0.458333	0.382353	1	0.0810811	0.392857	0.296296	0.0346821	0.375	0.464286	0.0555556	0.0645161	0.06	0.56	0.541667	0.0532544	0.366667	0.454545	0.09375	0.0490196	0.375	0.0540541	0.0727273	0.0588235	0.347826	0.108696	0.0777778	0.185185	0.52	0.24	0.0588235	0.0810811
CHOL_M364	0.62963	0.551724	0.458333	1	0.535714	0.075	0.541667	0.416667	0.184211	0.433333	0.0747664	0.464286	0.05	0.533333	0.4	0.538462	0.5	0.607143	0.0391061	0.0697674	0.555556	0.226415	0.52	0.37931	0.0833333	0.216216	0.538462	0.466667	0.571429	0.275862	0.346154	0.464286
CHOL_M54	0.382979	0.404255	0.339623	1	0.391304	0.26	0.531915	0.222222	0.23913	0.3	0.0625	0.319149	0.0443686	0.492537	0.326087	0.326087	0.27451	0.442857	0.0804598	0.046875	0.340426	0.162162	0.282609	0.270833	0.195652	0.168421	0.326087	0.27451	0.354167	0.170213	0.191489	0.265306
COAD_M123	0.772727	0.818182	0.578947	0.535714	1	0.0857143	0.684211	0.526316	0.212121	0.52	0.0891089	0.714286	0.0571429	0.64	0.5	0.666667	0.631579	0.666667	0.0461538	0.0789474	0.608696	0.25	0.571429	0.521739	0.110294	0.231884	0.666667	0.56	0.695652	0.333333	0.363636	0.565217
COAD_M132	0.588235	0.571429	0.0566038	0.526316	1	0.0465116	0.6	0.0352941	0.0631579	0.0454545	0.571429	0.714286	0.0205479	0.625	0.625	0.666667	0.6	0.529412	0.0784314	0.03125	0.529412	0.155556	0.444444	0.434783	0	0.084507	0	0.714286	0.714286	0.157895	0.227273	0.333333
COAD_M382	0.5	0.47619	0.615385	0.416667	1	0.0740741	0.642857	0.428571	0.03125	0.380952	0.0412371	0.421053	0.0769231	0.454545	0.5	0.529412	0.692308	0.444444	0.0526316	0.103448	0.473684	0.181818	0.5	0.368421	0.0714286	0.151515	0.625	0.428571	0.5	0.352941	0.615385	0.5
DLBC_M1289	0.0555556	0.52381	0.466667	0.392857	0.0571429	1	0.454545	0.0352941	0.578947	0.52	0.0606061	0.0731707	0.0597015	0.565217	0.619048	0.0736196	0.310345	0.416667	0.0983607	0.04	0.428571	0.0588235	0.0980392	0.0625	0.473684	0.0909091	0.0701754	0.16	0.590909	0.473684	0.0645161	0.0882353
DLBC_M583	0.047619	0.407407	0.388889	0.323529	0.0487805	1	0.357143	0.0340909	0.44	0.419355	0.0512821	0.0638298	0.0547945	0.448276	0.481481	0.0710059	0.257143	0.333333	0.0895522	0.0377358	0.333333	0.0551724	0.0877193	0.0555556	0.36	0.08	0.0677966	0.0909091	0.464286	0.272727	0.0540541	0.075
ESCA_M149	0.62069	0.5	0.407407	0.531915	0.586207	0.285714	1	0.37037	0.3	0.393939	0.0825688	0.466667	0.0526316	0.490909	0.357143	0.482759	0.444444	0.6	0.0555556	0.0652174	0.5	0.214286	0.413793	0.34375	0.37037	0.207792	0.482759	0.424242	0.516129	0.275862	0.266667	0.419355
ESCA_M347	0.705882	0.846154	0.0357143	0.631579	0.6	0.0434783	1	0.038961	0.0618557	0.0533333	0.846154	0.857143	0	0.75	0.75	0.8	0.857143	0.75	0.0961538	0.0277778	0.647059	0.148936	0.473684	0.521739	0	0.112676	0	0.733333	0.857143	0.142857	0.26087	0.4375
ESCA_M720	0.172414	0.555556	0.538462	0.296296	0.137931	0.454545	1	0.04	0.529412	0.545455	0.0350877	0.0833333	0.0634921	0.555556	0.578947	0.06875	0.333333	0.470588	0.0677966	0.0348837	0.444444	0.0514706	0.0769231	0.0681818	0.714286	0.047619	0.0714286	0.25	0.55	0.5	0.0810811	0.142857
ESCA_M721	0.65	0.619048	0.846154	0.541667	0.684211	0.0666667	1	0.769231	0.259259	0.52381	0.0612245	0.666667	0.0689655	0.590909	0.411765	0.8125	0.666667	0.545455	0.0454545	0.09375	0.722222	0.255814	0.588235	0.526316	0.0666667	0.19697	0.705882	0.65	0.65	0.444444	0.5	0.5
GBM_M456	0.5	0.47619	0.615385	0.416667	0.526316	0.0740741	0.769231	1	0.24	0.526316	0.0520833	0.5	0.0383142	0.466667	0.3125	0.625	0.466667	0.47619	0.0361446	0.0666667	0.555556	0.214286	0.411765	0.368421	0.0597015	0.151515	0.529412	0.5	0.5	0.352941	0.3125	0.421053
HNSC_M308	0.0666667	0.529412	0.5	0.375	0.107143	0.578947	0.529412	0.0434783	1	0.6	0.0318021	0.0909091	0.0655738	0.666667	0.75	0.0696203	0.333333	0.533333	0.109091	0.0315789	0.5	0.0681818	0.0869565	0.097561	0.571429	0.0769231	0.060241	0.277778	0.611111	0.692308	0.08	0.107143
KICH_M107	0.0810811	0.545455	0.586207	0.464286	0.114286	0.52	0.545455	0.0409357	0.6	1	0.0483871	0.103448	0.0612245	0.652174	0.714286	0.0792683	0.37931	0.55	0.0952381	0.049505	0.454545	0.0642857	0.0740741	0.0816327	0.5	0.111111	0.0909091	0.24	0.681818	0.428571	0.0606061	0.0833333
KICH_M261	0.56	0.538462	0.428571	0.433333	0.52	0.0857143	0.52381	0.526316	0.176471	1	0.0784314	0.44	0.0571429	0.518519	0.363636	0.521739	0.47619	0.481481	0.0402299	0.0789474	0.48	0.22449	0.5	0.346154	0.0785714	0.197183	0.590909	0.444444	0.56	0.28	0.25	0.5
KIRC_M788	0.6875	1	0	0.611111	0.571429	0.05	0.846154	0.04	0.0520833	0.0491071	1	0.846154	0.010582	0.733333	0.733333	0.785714	0.846154	0.733333	0.1	0.0434783	0.625	0.130435	0.444444	0.5	0	0.115942	0	0.714286	0.846154	0.1	0.285714	0.5
KIRP_M160	0.8125	0.846154	0.0545455	0.722222	0.714286	0.0444444	0.857143	0.038961	0.0729167	0.0580357	0.846154	1	0.0202703	0.866667	0.866667	0.928571	0.857143	0.75	0.0961538	0.04	0.75	0.173913	0.555556	0.590909	0	0.112676	0	0.857143	1	0.142857	0.26087	0.448276
KIRP_M182	0.761905	0.727273	0.555556	0.464286	0.714286	0.0606061	0.666667	0.5	0.1875	0.44	0.0693069	1	0.0606061	0.625	0.4	0.833333	0.526316	0.583333	0.0346821	0.0833333	0.75	0.234043	0.631579	0.736842	0.0833333	0.220588	0.571429	0.48	0.681818	0.304348	0.473684	0.545455
KIRP_M702	0.52381	0.5	0.352941	0.285714	0.55	0.0714286	0.470588	0.466667	0.222222	0.347826	0.0618557	1	0.0340909	0.416667	0.210526	0.555556	0.333333	0.375	0.0357143	0.037037	0.5	0.177778	0.368421	0.473684	0.0681818	0.147059	0.4	0.333333	0.454545	0.190476	0.210526	0.380952
LIHC_M16	0.75	0.791667	0.5	0.533333	0.64	0.0789474	0.590909	0.454545	0.194444	0.518519	0.0865385	0.625	0.0526316	1	0.5	0.652174	0.545455	0.592593	0.0412371	0.0731707	0.6	0.26	0.636364	0.461538	0.084507	0.257143	0.727273	0.5	0.826087	0.296296	0.375	0.625
LIHC_M17	0.9375	0.733333	0.0526316	0.833333	0.625	0.0652174	0.75	0.0379747	0.09375	0.0669643	0.733333	0.866667	0.0337838	1	1	0.933333	0.75	0.789474	0.0925926	0.037037	0.875	0.166667	0.666667	0.681818	0	0.109589	0.04	0.75	0.866667	0.130435	0.24	0.517241
LIHC_M174	0.454545	0.5	0.277778	0.333333	0.47619	0.107143	0.388889	0.466667	0.137931	0.409091	0.0842105	0.333333	0.047619	1	0.533333	0.333333	0.333333	0.434783	0.045977	0.0609756	0.304348	0.152174	0.3	0.166667	0.0746269	0.147059	0.473684	0.333333	0.52381	0.190476	0.1875	0.571429
LIHC_M176	0.0519481	0.75	0.733333	0.4	0.0123457	0.52381	0.555556	0.04	0.529412	0.545455	0.0689655	0.0810811	0.0697674	1	0.764706	0.0555556	0.5	0.5625	0.0857143	0.0416667	0.529412	0.0666667	0.106383	0.0681818	0.6	0.0731707	0.0588235	0.0857143	0.631579	0.5	0.0740741	0.0555556
LIHC_M18	0.0555556	0.777778	0.578947	0.56	0.0882353	0.565217	0.52381	0.0414201	0.666667	0.652174	0.0606061	0.0731707	0.0638298	1	0.888889	0.0670732	0.461538	0.611111	0.116667	0.0505051	0.578947	0.0652174	0.0980392	0.0851064	0.555556	0.116279	0.0804598	0.208333	0.75	0.473684	0.0645161	0.0882353
LIHC_M4	0.625	0.381818	0.306452	0.492537	0.345455	0.216667	0.490909	0.181818	0.218182	0.271186	0.2	0.309091	0.0551724	1	0.290909	0.290909	0.229508	0.761905	0.0721649	0.0444444	0.571429	0.28	0.254545	0.453125	0.181818	0.273684	0.290909	0.229508	0.339286	0.181818	0.242424	0.553846
LUAD_M601	0.55	0.52381	0.294118	0.4	0.5	0.111111	0.411765	0.3125	0.0473684	0.363636	0.0736842	0.4	0.0740741	0.533333	1	0.421053	0.4375	0.52381	0.05	0.0645161	0.380952	0.173913	0.470588	0.227273	0.0671642	0.166667	0.5	0.347826	0.55	0.263158	0.375	0.615385
LUAD_M608	0.9375	0.733333	0.0526316	0.833333	0.625	0.0652174	0.75	0.0379747	0.09375	0.0669643	0.733333	0.866667	0.0337838	1	1	0.933333	0.75	0.789474	0.0925926	0.037037	0.875	0.166667	0.666667	0.681818	0	0.109589	0.04	0.75	0.866667	0.130435	0.24	0.517241
LUAD_M610	0.0588235	0.764706	0.647059	0.541667	0.09375	0.619048	0.578947	0.0419162	0.75	0.714286	0.0645161	0.0769231	0.0666667	0.888889	1	0.0679012	0.5	0.6875	0.12069	0.0515464	0.647059	0.0661765	0.102041	0.0888889	0.625	0.121951	0.0823529	0.227273	0.833333	0.529412	0.0689655	0.09375
LUSC_M241	0.875	0.785714	0.0535714	0.777778	0.666667	0.0434783	0.8	0.0384615	0.0833333	0.0625	0.785714	0.928571	0.027027	0.933333	0.933333	1	0.8	0.736842	0.0943396	0.0384615	0.8125	0.170213	0.611111	0.636364	0	0.111111	0	0.8	0.928571	0.136364	0.25	0.482759
LUSC_M297	0.8	0.681818	0.6875	0.538462	0.666667	0.0606061	0.8125	0.625	0.233333	0.521739	0.0666667	0.833333	0.0625	0.652174	0.421053	1	0.555556	0.608696	0.0409357	0.0857143	0.888889	0.266667	0.666667	0.684211	0.0851064	0.223881	0.684211	0.565217	0.714286	0.380952	0.5	0.571429
MESO_M109	0.0526316	0.36	0.4375	0.366667	0.114286	0.310345	0.259259	0.0714286	0.333333	0.37931	0.0571429	0.103448	0.0612245	0.461538	0.5	0.0598802	1	0.409091	0.0952381	0.049505	0.391304	0.0555556	0.0943396	0.06	0.25	0.111111	0.0786517	0.148148	0.423077	0.25	0.0606061	0.0714286
MESO_M120	0.705882	0.846154	0.0357143	0.631579	0.6	0.0454545	0.857143	0.038961	0.0618557	0.0533333	0.846154	0.857143	0.0104712	0.75	0.75	0.8	1	0.75	0.0961538	0.04	0.647059	0.148936	0.473684	0.521739	0.0434783	0.112676	0	0.733333	0.857143	0.142857	0.26087	0.4375
MESO_M546	0.6	0.571429	0.642857	0.5	0.692308	0.0689655	0.666667	0.466667	0.178571	0.47619	0.0618557	0.526316	0.0714286	0.545455	0.4375	0.555556	1	0.555556	0.047619	0.0967742	0.5	0.272727	0.625	0.473684	0.0681818	0.181818	0.647059	0.52381	0.6	0.315789	0.533333	0.45
MESO_M625	0.0266667	0.411765	0.466667	0.347826	0.0125523	0.272727	0.333333	0.0258621	0.222222	0.304348	0.0576923	0.0295359	0.0769231	0.5	0.444444	0.0308642	1	0.5	0.0967742	0.0434783	0.375	0.037037	0.0666667	0.0487805	0.428571	0.0810811	0.0617284	0.105263	0.421053	0.25	0.0869565	0.0357143
OV_M123	0.9	0.418605	0.275	0.391304	0.404762	0.0740741	0.395833	0.25	0.12963	0.311111	0.275	0.390244	0.0487805	0.637931	0.375	0.4	0.3	1	0.0632911	0.0508475	0.825	0.35	0.35	0.56	0.0955414	0.325	0.365854	0.304348	0.428571	0.177778	0.313725	0.686275
OV_M124	0.0246914	0.363636	0.615385	0.423077	0.0606061	0.416667	0.363636	0.0384615	0.4	0.5	0.0517241	0.0373444	0.0666667	0.478261	0.52381	0.0824742	0.444444	1	0.1	0.0515464	0.473684	0.0583942	0.0384615	0.0888889	0.444444	0.15	0.108434	0.227273	0.65	0.368421	0.0689655	0.0606061
OV_M20	0.642857	0.350877	0.413793	0.442857	0.339286	0.233333	0.482143	0.178571	0.237288	0.288136	0.196429	0.303571	0.0486486	0.761905	0.267857	0.285714	0.225806	1	0.0707071	0.0441176	0.589286	0.276316	0.25	0.446154	0.178571	0.270833	0.263158	0.225806	0.310345	0.178571	0.238806	0.569231
OV_M293	0.782609	0.615385	0.454545	0.607143	0.666667	0.114286	0.6	0.47619	0.166667	0.481481	0.0873786	0.583333	0.0540541	0.592593	0.52381	0.608696	0.5	1	0.0416667	0.075	0.625	0.215686	0.521739	0.423077	0.108696	0.225352	0.541667	0.464286	0.64	0.307692	0.333333	0.52
OV_M294	0.842105	0.578947	0.0491803	0.681818	0.5	0.06	0.6	0.0361446	0.09	0.0657895	0.578947	0.684211	0.0328947	0.789474	0.789474	0.736842	0.6	1	0.0862069	0.0322581	0.789474	0.2	0.545455	0.576923	0.0384615	0.133333	0.0606061	0.6	0.684211	0.111111	0.210526	0.5
OV_M295	0.0263158	0.470588	0.642857	0.454545	0.0714286	0.380952	0.470588	0.0304878	0.533333	0.55	0.0566038	0.0454545	0.075	0.611111	0.6875	0.05	0.5	1	0.09375	0.0543478	0.642857	0.0606061	0.0425532	0.1	0.615385	0.138889	0.0609756	0.294118	0.647059	0.5	0.0833333	0.0714286
OV_M464	0.636364	0.48	0.5	0.538462	0.521739	0.133333	0.526316	0.444444	0.166667	0.4	0.0490196	0.5	0.0625	0.461538	0.421053	0.6	0.555556	1	0.04	0.0857143	0.619048	0.1875	0.428571	0.454545	0.0833333	0.171429	0.454545	0.44	0.5	0.318182	0.421053	0.375
OV_M467	0.722222	0.733333	0.04	0.571429	0.529412	0	0.75	0.0379747	0.0606061	0.0528634	0.733333	0.75	0.013245	0.666667	0.666667	0.705882	0.75	1	0.0925926	0.037037	0.666667	0.191489	0.428571	0.48	0.0416667	0.140845	0.0689655	0.647059	0.75	0.130435	0.24	0.419355
PRAD_M261	0.916667	0.384615	0.333333	0.416667	0.368421	0.046875	0.393939	0.30303	0.148936	0.3	0.333333	0.428571	0.05	0.571429	0.454545	0.484848	0.352941	0.825	0.0694444	0.0576923	1	0.37037	0.342857	0.651163	0.0714286	0.302632	0.361111	0.352941	0.394737	0.210526	0.363636	0.680851
PRAD_M529	0.025974	0.444444	0.411765	0.375	0.0689655	0.428571	0.444444	0.0240964	0.5	0.454545	0.0363636	0.0555556	0.047619	0.578947	0.647059	0.0496894	0.391304	0.642857	0.0892857	0.037037	1	0.0522388	0.0638298	0.097561	0.466667	0.105263	0.047619	0.277778	0.611111	0.466667	0.08	0.0689655
PRAD_M618	0.809524	0.625	0.611111	0.555556	0.608696	0.0588235	0.722222	0.555556	0.21875	0.48	0.0625	0.75	0.0588235	0.6	0.380952	0.888889	0.5	0.625	0.0404624	0.0810811	1	0.282609	0.6	0.619048	0.0816327	0.235294	0.619048	0.52	0.652174	0.347826	0.45	0.521739
PRAD_M619	0.9375	0.625	0.0526316	0.736842	0.529412	0.0652174	0.647059	0.0379747	0.09375	0.0622222	0.625	0.75	0.0337838	0.875	0.875	0.8125	0.647059	0.789474	0.0727273	0.012766	1	0.142857	0.578947	0.608696	0	0.0945946	0.04	0.647059	0.75	0.130435	0.192308	0.517241
SARC_M150	0.7	0.666667	0.5625	0.52	0.571429	0.1	0.588235	0.411765	0.129032	0.5	0.0714286	0.631579	0.0666667	0.636364	0.470588	0.666667	0.625	0.521739	0.0333333	0.0909091	0.6	0.25	1	0.578947	0.0888889	0.212121	0.764706	0.478261	0.7	0.285714	0.470588	0.631579
SARC_M360	0.631579	0.444444	0.0526316	0.571429	0.444444	0.0652174	0.473684	0.04	0.09375	0.0528634	0.444444	0.555556	0.0337838	0.666667	0.666667	0.611111	0.473684	0.545455	0.0727273	0.012766	0.578947	0.12	1	0.48	0	0.0945946	0.04	0.473684	0.555556	0.130435	0.148148	0.375
SKCM_M109	0.608696	0.289474	0.25641	0.365854	0.266667	0.0588235	0.307692	0.170732	0.0940171	0.1875	0.289474	0.342105	0.0381944	0.453125	0.394737	0.368421	0.307692	0.56	0.0649351	0.0526316	0.651163	0.274194	0.292683	1	0.057971	0.238095	0.227273	0.307692	0.342105	0.133333	0.3	0.527273
SKCM_M1303	0.368421	0.4	0.0327869	0.333333	0.235294	0.05	0.352941	0.0434783	0.0454545	0.030837	0.4	0.352941	0	0.388889	0.388889	0.411765	0.352941	0.318182	0.0588235	0.04	0.388889	0.0625	0.190476	1	0	0.0588235	0	0.352941	0.352941	0.0333333	0.130435	0.333333
SKCM_M1304	0.4	0.277778	0.0555556	0.363636	0.352941	0.0697674	0.315789	0.0348837	0.0736842	0.0350877	0.277778	0.388889	0.0444444	0.421053	0.421053	0.368421	0.315789	0.347826	0.047619	0.0175439	0.35	0.104167	0.421053	1	0	0.0540541	0	0.315789	0.388889	0.15	0.12	0.242424
SKCM_M593	0.565217	0.541667	0.588235	0.37931	0.521739	0.0625	0.526316	0.368421	0.15625	0.346154	0.0666667	0.736842	0.0625	0.461538	0.227273	0.684211	0.473684	0.454545	0.031746	0.0857143	0.619048	0.1875	0.578947	1	0.0851064	0.171429	0.454545	0.384615	0.5	0.26087	0.421053	0.375
SKCM_M594	0.652174	0.5	0.046875	0.6	0.434783	0.0769231	0.521739	0.0421053	0.0873786	0.0649351	0.5	0.590909	0.0363636	0.681818	0.681818	0.636364	0.521739	0.576923	0.0819672	0.027027	0.608696	0.145455	0.48	1	0	0.1	0.0350877	0.521739	0.590909	0.1	0.1875	0.416667
STAD_M701	0.0714286	0.6	0.692308	0.347826	0.0357143	0.473684	0.714286	0.0306748	0.571429	0.5	0.0377358	0.047619	0.0677966	0.6	0.625	0.04375	0.428571	0.615385	0.0714286	0.04	0.466667	0.0530303	0.0434783	0.075	1	0.0526316	0.0617284	0.166667	0.588235	0.538462	0.0869565	0.0740741
THCA_M87	0.714286	0.761905	0.588235	0.538462	0.666667	0.09375	0.705882	0.529412	0.193548	0.590909	0.07	0.571429	0.0625	0.727273	0.5	0.684211	0.647059	0.541667	0.0348837	0.0857143	0.619048	0.28	0.764706	0.454545	0.0851064	0.223881	1	0.565217	0.8	0.380952	0.421053	0.65
THYM_M107	0.538462	0.518519	0.55	0.466667	0.56	0.0540541	0.65	0.5	0.205882	0.444444	0.0673077	0.48	0.0555556	0.5	0.347826	0.565217	0.52381	0.464286	0.04	0.0769231	0.52	0.244898	0.478261	0.384615	0.0704225	0.194444	0.565217	1	0.538462	0.32	0.347826	0.423077
THYM_M95	0.705882	0.714286	0.0545455	0.631579	0.714286	0.0444444	0.733333	0.038961	0.0618557	0.0533333	0.714286	0.857143	0.0202703	0.75	0.75	0.8	0.733333	0.647059	0.0961538	0.037037	0.647059	0.173913	0.473684	0.521739	0	0.0972222	0	1	0.857143	0.142857	0.26087	0.4375
UCEC_M244	0.8125	0.846154	0.0545455	0.722222	0.714286	0.0444444	0.857143	0.038961	0.0729167	0.0580357	0.846154	1	0.0202703	0.866667	0.866667	0.928571	0.857143	0.75	0.0961538	0.04	0.75	0.173913	0.555556	0.590909	0	0.112676	0	0.857143	1	0.142857	0.26087	0.448276
UCEC_M54	0.818182	0.863636	0.55	0.571429	0.695652	0.0833333	0.65	0.5	0.205882	0.56	0.0882353	0.681818	0.0555556	0.826087	0.55	0.714286	0.6	0.64	0.0421053	0.0769231	0.652174	0.270833	0.7	0.5	0.0857143	0.264706	0.8	0.538462	1	0.32	0.409091	0.681818
UCEC_M60	0.0571429	0.631579	0.592593	0.52	0.0909091	0.590909	0.55	0.0416667	0.611111	0.681818	0.0508475	0.0740741	0.0652174	0.75	0.833333	0.0740741	0.423077	0.65	0.118644	0.0510204	0.611111	0.0656934	0.0784314	0.0869565	0.588235	0.119048	0.107143	0.217391	1	0.5	0.0666667	0.0909091
UCS_M121	0.32	0.307692	0.411765	0.275862	0.352941	0.0434783	0.444444	0.352941	0.133333	0.28	0.04	0.304348	0.0689655	0.296296	0.263158	0.380952	0.315789	0.318182	0.0416667	0.09375	0.347826	0.125	0.285714	0.26087	0.0431655	0.112676	0.380952	0.32	0.32	1	0.263158	0.277778
UCS_M198	0.0517241	0.28	0.304348	0.181818	0.0357143	0.333333	0.333333	0.0365854	0.428571	0.310345	0.0372671	0.0434783	0.103448	0.333333	0.36	0.0542169	0.1875	0.318182	0.0952381	0.029703	0.304348	0.057554	0.0566038	0.0625	0.333333	0.0434783	0.0933333	0.16	0.346154	1	0.0645161	0.0681818
UCS_M745	0.0454545	0.411765	0.466667	0.24	0.05	0.473684	0.5	0.047619	0.692308	0.428571	0.0283688	0.047619	0.0677966	0.5	0.529412	0.056962	0.25	0.5	0.0727273	0.0322581	0.466667	0.0610687	0.0666667	0.075	0.538462	0.0526316	0.0479042	0.133333	0.5	1	0.0869565	0.0833333
UVM_M431	0.409091	0.391304	0.466667	0.346154	0.615385	0.047619	0.5	0.3125	0.103448	0.25	0.08	0.473684	0.0740741	0.375	0.375	0.5	0.533333	0.421053	0.05	0.1	0.45	0.173913	0.470588	0.421053	0.0697674	0.149254	0.421053	0.347826	0.409091	0.263158	1	0.4
BLCA_M180	1	0.516484	0.493671	0.101449	0	0.0679612	0.518519	0.0571429	0.573333	0.204301	0.2875	0.202899	0.0731707	0.469388	0.433735	0.38806	0.304348	0.28169	0.268657	0.148649	0.217391	0.418803	0.304348	0.417476	0.420561	0.115942	0.0240964	0.0315789	0.482353	0.284553	0.245098	0.337079
BLCA_M737	1	0.278481	0.4375	0.0833333	0	0.0895522	0.413793	0.0769231	0.421053	0.219512	0.269231	0.243243	0.0571429	0.355556	0.285714	0.365854	0.358974	0.257143	0.297297	0.0909091	0.27027	0.322581	0.394737	0.295455	0.25	0.0810811	0.0434783	0.0517241	0.289855	0.236364	0.161765	0.223881
BRCA_M119	0.294118	1	0.269841	0.1875	0.0377358	0.0434783	0.290323	0.0512821	0.296296	0.15625	0.226415	0.216216	0.037037	0.333333	0.294118	0.410256	0.3	0.333333	0.146341	0.0606061	0.277778	0.214286	0.368421	0.228571	0.282051	0.0652174	0.0555556	0.0377358	0.239437	0.196429	0.141026	0.125
BRCA_M20	0.516484	1	0.444444	0.0813953	0	0.0517241	0.569767	0.0487805	0.477273	0.215686	0.277778	0.1875	0.0638298	0.485714	0.488636	0.329114	0.342105	0.288889	0.25974	0.154762	0.2	0.508475	0.275	0.449541	0.477477	0.126582	0.0232558	0.0377358	0.516484	0.349206	0.263636	0.29703
CESC_M105	0.493671	0.444444	1	0.114754	0.0186916	0.0625	0.554054	0.0645161	0.641791	0.238095	0.30137	0.229508	0.0810811	0.478261	0.460526	0.440678	0.344262	0.246753	0.283333	0.132353	0.225806	0.436364	0.344262	0.366337	0.411765	0.131148	0.0266667	0.0344828	0.512821	0.304348	0.265957	0.337349
CESC_M1360	0.37931	0.25	1	0.08	0.030303	0.0701754	0.24	0.0714286	0.5	0.263158	0.148936	0.214286	0.046875	0.47619	0.162162	0.189189	0.171429	0.25	0.2	0.04	0.285714	0.26087	0.35	0.285714	0.208333	0.12	0.0434783	0.0425532	0.391304	0.217391	0.135593	0.111111
CESC_M667	0.342466	0.294118	1	0.12766	0	0.04	0.357143	0.0952381	0.40625	0.217391	0.209677	0.122449	0.111111	0.387755	0.318841	0.354167	0.24	0.177778	0.23913	0.1875	0.208333	0.28972	0.243902	0.34	0.265306	0.113636	0.025974	0.0444444	0.454545	0.259259	0.253165	0.263889
CESC_M668	0.4375	0.192308	1	0.0645161	0.0277778	0.0634921	0.25	0.0588235	0.375	0.189189	0.176471	0.25	0.0428571	0.37037	0.258065	0.219512	0.236842	0.2	0.166667	0.0357143	0.222222	0.210526	0.342857	0.275	0.172043	0.0967742	0.0344828	0.0377358	0.310345	0.192308	0.123077	0.134328
ESCA_M517	0.413793	0.290323	0.272727	0.166667	0	0.0689655	1	0.0869565	0.315789	0.153846	0.27907	0.296296	0.0454545	0.25	0.416667	0.451613	0.3125	0.5	0.275862	0.136364	0.44	0.315789	0.3125	0.236842	0.37931	0.114286	0.0571429	0.0416667	0.291667	0.388889	0.144928	0.245614
ESCA_M87	0.518519	0.569767	0.554054	0.0833333	0.027027	0.0594059	1	0.0597015	0.691176	0.267442	0.298701	0.230769	0.0759494	0.5	0.506494	0.384615	0.318182	0.311688	0.301587	0.138889	0.191176	0.509259	0.338462	0.43	0.505051	0.138462	0.0215827	0.043956	0.576923	0.324786	0.291667	0.348837
HNSC_M141	0.573333	0.477273	0.641791	0.106061	0.0186916	0.0625	0.691176	0.0645161	1	0.268293	0.319444	0.229508	0.0810811	0.511111	0.5	0.465517	0.344262	0.297297	0.350877	0.166667	0.225806	0.504762	0.366667	0.4375	0.484536	0.15	0.0266667	0.0344828	0.552632	0.327434	0.265957	0.353659
HNSC_M645	0.30137	0.319149	0.403226	0.136364	0	0.0652174	0.393939	0.102564	1	0.208955	0.220339	0.130435	0.117647	0.329412	0.396825	0.347826	0.282609	0.222222	0.459459	0.227273	0.222222	0.285714	0.25	0.277778	0.287234	0.179487	0.027027	0.046875	0.4	0.226415	0.2	0.257143
HNSC_M646	0.392857	0.222222	0.5	0.0833333	0.0307692	0.0454545	0.177419	0.08	1	0.210526	0.0816327	0.137931	0.0909091	0.304348	0.078125	0.102564	0.0810811	0.318182	0.0606061	0.0416667	0.25	0.473684	0.212121	0.294118	0.333333	0.0454545	0.04	0.037037	0.347826	0.195652	0.137931	0.0952381
KIRC_M130	0.2875	0.277778	0.30137	0.104167	0	0.0555556	0.298701	0.108696	0.319444	0.289855	1	0.395349	0.0449438	0.271186	0.297297	0.428571	0.313725	0.209677	0.291667	0.192308	0.234043	0.269231	0.313725	0.336957	0.365385	0.122807	0.0333333	0.0714286	0.320513	0.163793	0.268293	0.352113
LIHC_M110	0.469388	0.485714	0.478261	0.0930233	0	0.0406504	0.5	0.0454545	0.511111	0.214953	0.260417	0.16092	0.06	1	0.397959	0.337349	0.270588	0.340659	0.240964	0.131868	0.172414	0.483871	0.270588	0.378151	0.465517	0.091954	0.019802	0.0265487	0.454545	0.294118	0.218487	0.292453
LIHC_M1219	0.35	0.275862	0.47619	0.111111	0	0.0666667	0.203125	0.1	0.304348	0.285714	0.163265	0.16	0.0447761	1	0.148148	0.205128	0.157895	0.32	0.181818	0.0357143	0.304348	0.28	0.419355	0.333333	0.230769	0.107143	0.0344828	0.04	0.296296	0.340909	0.147541	0.106061
LIHC_M555	0.355556	0.333333	0.341463	0.142857	0	0.0649351	0.283784	0.0851064	0.343284	0.229167	0.271186	0.222222	0.0352941	1	0.255814	0.326531	0.265306	0.310345	0.212766	0.0515464	0.241935	0.266055	0.44186	0.245283	0.252525	0.0652174	0.0363636	0.0294118	0.272727	0.262295	0.157895	0.181818
LUAD_M1159	0.285714	0.294118	0.298246	0.185185	0	0.0377358	0.416667	0.0344828	0.318182	0.172414	0.204082	0.3	0.0344828	0.255814	1	0.441176	0.210526	0.37037	0.138889	0.115385	0.333333	0.318182	0.352941	0.243902	0.375	0.0487805	0.0512821	0.0333333	0.230769	0.318182	0.185714	0.190476
LUAD_M217	0.433735	0.488636	0.460526	0.112903	0	0.0510204	0.506494	0.0512821	0.5	0.206897	0.297297	0.245902	0.0657895	0.397959	1	0.457627	0.296875	0.254237	0.278689	0.181818	0.262295	0.40708	0.276923	0.418367	0.367925	0.129032	0.0263158	0.045977	0.506329	0.237705	0.304348	0.302326
LUAD_M659	0.27907	0.253012	0.333333	0.135135	0.016129	0.0454545	0.333333	0.0526316	0.333333	0.164179	0.254545	0.361111	0.0384615	0.235955	1	0.439024	0.191489	0.305556	0.186047	0.114286	0.351351	0.375	0.302326	0.244898	0.35	0.06	0.0408163	0.0428571	0.277778	0.21875	0.223684	0.231884
LUSC_M160	0.38806	0.410256	0.440678	0.162162	0	0.0444444	0.451613	0.108108	0.465517	0.215385	0.428571	0.351351	0.0576923	0.337349	0.457627	1	0.357143	0.371429	0.3	0.138889	0.307692	0.365854	0.425	0.347826	0.341463	0.102041	0.04	0.031746	0.430769	0.25	0.236842	0.30303
OV_M1160	0.193548	0.333333	0.137931	0.2	0	0.0545455	0.444444	0.05	0.4	0.0833333	0.186047	0.192308	0.047619	0.210526	0.304348	0.333333	0.225806	1	0.1	0.105263	0.454545	0.235294	0.225806	0.208333	0.384615	0.0606061	0.0645161	0.08	0.138462	0.0816327	0.1	0.210526
OV_M1816	0.2	0.241379	0.25	0.0740741	0	0.04	0.178571	0.0714286	0.318182	0.238095	0.0769231	0.12	0.08	0.32	0.111111	0.0909091	0.075	1	0.0857143	0.037037	0.26087	0.409091	0.228571	0.236842	0.347826	0.0714286	0.04	0.04	0.259259	0.234043	0.15	0.0833333
OV_M619	0.257143	0.264706	0.196721	0.148148	0	0.0483871	0.5	0.0769231	0.272727	0.1	0.208333	0.225806	0.0606061	0.177778	0.37037	0.371429	0.216216	1	0.142857	0.12	0.5	0.294118	0.25	0.190476	0.433333	0.05	0.0526316	0.0625	0.246154	0.4	0.0933333	0.174603
PAAD_M477	0.297297	0.25974	0.283333	0.142857	0	0.0615385	0.301587	0.137931	0.459459	0.193548	0.291667	0.166667	0.119048	0.240964	0.278689	0.3	0.361111	0.219512	1	0.222222	0.194444	0.230769	0.296296	0.230769	0.214286	0.125	0.03125	0.0555556	0.287879	0.170213	0.176471	0.238095
PRAD_M522	0.27027	0.277778	0.225806	0.172414	0	0.0625	0.44	0.0666667	0.24	0.147541	0.196078	0.28125	0.04	0.191489	0.351351	0.307692	0.230769	0.5	0.194444	0.148148	1	0.305556	0.263158	0.195402	0.4375	0.0465116	0.0487805	0.0483871	0.193548	0.291667	0.133333	0.203125
READ_M364	0.322581	0.166667	0.26087	0.12	0.0416667	0.0508475	0.142857	0.107143	0.473684	0.25	0.0784314	0.173913	0.0833333	0.28	0.115385	0.0714286	0.105263	0.409091	0.0882353	0.0416667	0.217391	1	0.2	0.243243	0.363636	0.0740741	0.0357143	0.0416667	0.32	0.266667	0.172414	0.0869565
READ_M41	0.418803	0.508475	0.436364	0.0841121	0	0.0416667	0.509259	0.0363636	0.504762	0.178295	0.222222	0.138889	0.0491803	0.483871	0.40708	0.266667	0.226415	0.309091	0.190476	0.116071	0.16	1	0.214953	0.409091	0.488372	0.0833333	0	0.0298507	0.45614	0.365517	0.192857	0.242188
SARC_M281	0.394737	0.368421	0.344262	0.176471	0.0253165	0.0422535	0.338462	0.075	0.366667	0.186047	0.313725	0.342857	0.038961	0.44186	0.352941	0.425	0.285714	0.27907	0.25641	0.0571429	0.263158	0.232558	1	0.26087	0.268293	0.108108	0.0425532	0.0508475	0.304348	0.254545	0.151899	0.220588
SKCM_M71	0.417476	0.449541	0.366337	0.0786517	0	0.04	0.43	0.0561798	0.4375	0.211009	0.336957	0.197674	0.0588235	0.378151	0.418367	0.329412	0.264368	0.227723	0.22093	0.129032	0.195402	0.409091	0.25	1	0.433333	0.0898876	0.0204082	0.0350877	0.46	0.308824	0.278261	0.32381
STAD_M1095	0.243902	0.282051	0.290323	0.151515	0	0.0588235	0.37931	0.0588235	0.290323	0.176471	0.27451	0.25	0.037037	0.22449	0.375	0.341463	0.3	0.433333	0.175	0.206897	0.4375	0.342105	0.268293	0.23913	1	0.0857143	0.0444444	0.0512821	0.257143	0.25	0.141026	0.208955
STAD_M163	0.420561	0.477477	0.411765	0.07	0	0.0542636	0.505051	0.0526316	0.484536	0.301887	0.357895	0.159574	0.0654206	0.465517	0.367925	0.265957	0.26087	0.238095	0.206522	0.168421	0.170213	0.488372	0.195876	0.433333	1	0.131868	0.0196078	0.0420168	0.447619	0.333333	0.285714	0.294643
STAD_M601	0.315217	0.357143	0.269663	0.0857143	0.0147059	0.0294118	0.404762	0.0632911	0.345238	0.202247	0.180723	0.0684932	0.0921053	0.349515	0.23913	0.147059	0.164384	0.253165	0.176471	0.176471	0.190476	0.341667	0.138462	0.293578	1	0.142857	0.0245902	0.0344828	0.315217	0.275	0.173077	0.175258
UCEC_M115	0.482353	0.516484	0.512821	0.101449	0.0263158	0.0377358	0.576923	0.0571429	0.552632	0.217391	0.320513	0.202899	0.0731707	0.454545	0.506329	0.430769	0.323529	0.283951	0.287879	0.180556	0.183099	0.45614	0.304348	0.46	0.447619	0.132353	0.0240964	0.0425532	1	0.350427	0.257426	0.337079
UCEC_M507	0.402597	0.445783	0.454545	0.125	0	0.0333333	0.438356	0.0769231	0.449275	0.236842	0.268657	0.160714	0.09375	0.4	0.422535	0.388889	0.333333	0.235294	0.264151	0.218182	0.236364	0.333333	0.244898	0.350877	0.34	0.113208	0.0307692	0.0322581	1	0.238095	0.282353	0.311688
BLCA_M1248	1	0.392857	0.423077	0.21875	0	0.0689655	0.24	0.130435	0.470588	0.2	0.192308	0.027027	0.0873786	0.142857	0.344828	0.195652	0.0666667	0.588235	0.2	0.166667	0.0410959	0.0833333	0.0104603	0.2	0.36	0.04	0.0357143	0.0384615	0.444444	0.217391	0.166667	0.142857
BLCA_M131	1	0.393443	0.383333	0.278846	0	0.166667	0.241935	0.209877	0.360656	0.151515	0.0921053	0.125	0.410714	0.163934	0.328125	0.442857	0.336449	0.532258	0.253012	0.173913	0.17284	0.192771	0.194805	0.290698	0.333333	0.0735294	0.0958904	0.0759494	0.283333	0.351351	0.0724638	0.230769
BLCA_M554	1	0.344828	0.48	0.258065	0	0.0689655	0.409091	0.368421	0.423077	0.153846	0.0588235	0.0612245	0.0967742	0.238095	0.315789	0.421053	0.368421	0.324324	0.304348	0.25	0.0652174	0.104167	0.0434783	0.227273	0.36	0.08	0.0967742	0.114286	0.24	0.5625	0.05	0.0833333
BRCA_M162	0.393443	1	0.714286	0.351351	0	0.135135	0.4	0.233333	0.655172	0.322581	0.135135	0.0747664	0.171429	0.243902	0.785714	0.434783	0.193548	0.666667	0.366667	0.352941	0.0714286	0.122807	0.0285714	0.333333	0.607143	0.0277778	0.0714286	0.111111	0.615385	0.477273	0.114286	0.129032
BRCA_M643	0.263158	1	0.32	0.25	0	0.08	0.35	0.1	0.32	0.181818	0.0526316	0.0309278	0.0588235	0.2	0.346154	0.352941	0.1	0.352941	0.238095	0.192308	0.0606061	0.111111	0.00630252	0.333333	0.428571	0.0145985	0.0416667	0.0454545	0.227273	0.263158	0.0588235	0.111111
CESC_M1055	0.27381	0.384615	1	0.285714	0.0172414	0.0666667	0.328571	0.229167	0.489362	0.166667	0.126582	0.134615	0.168831	0.245283	0.384615	0.313433	0.156863	0.389831	0.235294	0.214286	0.0670732	0.163636	0.105263	0.240506	0.367347	0.0847458	0.0515464	0.107692	0.306122	0.407407	0.0892857	0.197802
CESC_M1566	0.48	0.714286	1	0.454545	0	0.111111	0.538462	0.4	0.916667	0.3	0.142857	0.0761905	0.130841	0.288889	0.655172	0.454545	0.25	0.657143	0.444444	0.375	0.0545455	0.107143	0.0285714	0.321429	0.72	0.0909091	0.075	0.116279	0.6	0.465116	0.121212	0.137931
CHOL_M357	0.258065	0.351351	0.454545	1	0	0.105263	0.448276	0.193548	0.454545	0.205882	0.0769231	0.0571429	0.0884956	0.304348	0.315789	0.269231	0.15625	0.333333	0.413793	0.243243	0.0588235	0.125	0.0277778	0.225806	0.5	0.0555556	0.0714286	0.0638298	0.272727	0.3	0.0833333	0.09375
ESCA_M242	0.409091	0.4	0.538462	0.448276	0	0.0625	1	0.26087	0.538462	0.222222	0.0384615	0.0490196	0.0648148	0.3	0.354839	0.428571	0.208333	0.368421	0.5	0.225806	0.04	0.0980392	0.037037	0.304348	0.608696	0.0714286	0.0571429	0.105263	0.307692	0.333333	0.075	0.08
GBM_M1288	0.368421	0.233333	0.4	0.193548	0.0909091	0.0434783	0.26087	1	0.4	0.12	0.0740741	0.0416667	0.1	0.146341	0.352941	0.232558	0.411765	0.294118	0.217391	0.178571	0.0444444	0.12	0.0571429	0.214286	0.230769	0.136364	0.103448	0.121212	0.16	0.352941	0.0588235	0.16
HNSC_M106	0.2875	0.416667	0.534884	0.283019	0.0576923	0.0714286	0.333333	0.27907	1	0.18	0.174603	0.12	0.205128	0.333333	0.446809	0.5	0.218391	0.418182	0.255319	0.28	0.0684932	0.108108	0.214286	0.302083	0.4	0.0566038	0.0645161	0.0793651	0.333333	0.31746	0.0925926	0.105882
HNSC_M1192	0.470588	0.44	0.478261	0.333333	0	0.12	0.333333	0.0952381	1	0.227273	0.217391	0.028169	0.0792079	0.233333	0.384615	0.238095	0.0952381	0.5	0.285714	0.230769	0.0454545	0.0909091	0.0434783	0.2	0.55	0.0384615	0.03125	0.0588235	0.4375	0.25	0.190476	0.235294
HNSC_M536	0.423077	0.655172	0.916667	0.454545	0.0294118	0.111111	0.538462	0.4	1	0.3	0.142857	0.0761905	0.130841	0.288889	0.655172	0.454545	0.25	0.611111	0.444444	0.333333	0.0740741	0.107143	0.0207469	0.321429	0.72	0.0909091	0.075	0.116279	0.6	0.431818	0.121212	0.137931
LGG_M71	0.410714	0.258621	0.233645	0.195804	0.0679612	0.151724	0.195804	0.277778	0.272727	0.174699	0.205607	0.273381	1	0.216216	0.309091	0.333333	0.483607	0.309735	0.245614	0.198675	0.117647	0.160305	0.25	0.333333	0.201923	0.102857	0.0851064	0.0884956	0.238095	0.253165	0.0901639	0.221477
LUAD_M1228	0.315789	0.384615	0.36	0.241379	0.0454545	0.0952381	0.333333	0.352941	0.416667	0.173913	0.05	0.0520833	0.105263	0.193548	1	0.411765	0.277778	0.277778	0.227273	0.185185	0.1	0.105263	0.0105263	0.2	0.291667	0.0416667	0.107143	0.0909091	0.333333	0.25	0.0571429	0.12
LUAD_M685	0.344828	0.785714	0.655172	0.315789	0.0571429	0.135135	0.354839	0.321429	0.655172	0.322581	0.166667	0.0849057	0.171429	0.243902	1	0.466667	0.233333	0.578947	0.322581	0.314286	0.0714286	0.163636	0.0416667	0.381818	0.551724	0.0277778	0.0714286	0.0869565	0.615385	0.413043	0.114286	0.129032
LUSC_M1416	0.421053	0.407407	0.44	0.266667	0	0.0714286	0.428571	0.190476	0.384615	0.26087	0.0454545	0.0729167	0.0727273	0.258065	0.411765	1	0.190476	0.3	0.318182	0.214286	0.0434783	0.0952381	0.027027	0.368421	0.375	0.0384615	0.1	0.0555556	0.363636	0.285714	0.0833333	0.0833333
LUSC_M195	0.355556	0.318182	0.328125	0.35	0.0571429	0.0909091	0.234375	0.176471	0.5	0.119718	0.177215	0.128	0.333333	0.324324	0.338462	1	0.22549	0.426471	0.181818	0.185714	0.154762	0.1	0.230769	0.345794	0.28125	0.0675676	0.0625	0.0769231	0.253968	0.291139	0.0659341	0.123077
LUSC_M690	0.442857	0.434783	0.454545	0.325581	0.0392157	0.0740741	0.318182	0.232558	0.454545	0.163265	0.0943396	0.0916667	0.230088	0.206349	0.466667	1	0.238095	0.583333	0.266667	0.215686	0.206349	0.12	0.0416667	0.277778	0.418605	0.0588235	0.0701754	0.0819672	0.348837	0.372881	0.0576923	0.116071
MESO_M104	0.336449	0.284314	0.231579	0.171123	0.0795455	0.111111	0.19084	0.242424	0.28866	0.132075	0.191011	0.255814	0.483607	0.188119	0.252427	0.27	1	0.231481	0.221154	0.155556	0.113208	0.161017	0.25	0.259542	0.162791	0.0753623	0.078125	0.102041	0.197917	0.22	0.0825688	0.159722
MESO_M1249	0.368421	0.193548	0.25	0.15625	0.0909091	0.0740741	0.208333	0.411765	0.25	0.0425532	0.047619	0.0416667	0.118644	0.142857	0.277778	0.190476	1	0.175	0.166667	0.222222	0.0952381	0.1	0.0571429	0.148148	0.185185	0.0869565	0.0666667	0.0882353	0.128205	0.4375	0.0588235	0.0740741
OV_M1138	0.588235	0.461538	0.565217	0.266667	0	0.153846	0.25	0.190476	0.5	0.16	0.153846	0.04	0.0882353	0.181818	0.461538	0.3	0.136364	1	0.208333	0.259259	0.0416667	0.0952381	0.04	0.277778	0.434783	0.0416667	0.0361446	0.04	0.388889	0.232558	0.125	0.15
OV_M611	0.532258	0.666667	0.657143	0.333333	0	0.106383	0.368421	0.27027	0.611111	0.243902	0.106383	0.0683761	0.220183	0.22807	0.578947	0.583333	0.240506	1	0.342105	0.272727	0.129032	0.121212	0.0327869	0.283582	0.571429	0.0666667	0.0576923	0.111111	0.485714	0.530612	0.0888889	0.133333
PAAD_M439	0.304348	0.366667	0.444444	0.413793	0	0.0645161	0.5	0.217391	0.444444	0.28	0.0645161	0.0291262	0.0857143	0.243902	0.322581	0.318182	0.166667	0.342105	1	0.233333	0.0408163	0.1	0	0.208333	0.565217	0.0740741	0.0588235	0.0789474	0.32	0.302326	0.0769231	0.0740741
STAD_M539	0.36	0.607143	0.72	0.5	0	0.121212	0.608696	0.230769	0.72	0.333333	0.15625	0.047619	0.12381	0.309524	0.551724	0.418605	0.185185	0.571429	0.565217	0.322581	0.0784314	0.139535	0.03125	0.269231	1	0.0645161	0.0526316	0.0714286	0.48	0.463415	0.133333	0.153846
UCEC_M1184	0.444444	0.423077	0.4	0.15625	0	0.0740741	0.115385	0.142857	0.4375	0.217391	0.208333	0.0416667	0.111111	0.137931	0.423077	0.232558	0.121951	0.388889	0.166667	0.178571	0.0571429	0.12	0.0416667	0.214286	0.28	0.0434783	0.0454545	0.0882353	1	0.238095	0.181818	0.157895
UCEC_M766	0.409091	0.615385	0.6	0.272727	0	0.0740741	0.307692	0.16	0.6	0.375	0.172414	0.07	0.127451	0.225806	0.615385	0.363636	0.133333	0.485714	0.32	0.266667	0.0769231	0.1	0.0344828	0.259259	0.48	0.0357143	0.0571429	0.0769231	1	0.357143	0.148148	0.125
UCS_M11	0.257426	0.295775	0.407407	0.210526	0.0131579	0.0461538	0.217391	0.141176	0.267606	0.121622	0.135417	0.112676	0.130137	0.19685	0.260274	0.255814	0.130435	0.342105	0.185714	0.142857	0.0893855	0.105263	0.136986	0.168317	0.279412	0.05	0.0608696	0.0823529	0.217391	1	0.0519481	0.162162
UCS_M173	0.351351	0.477273	0.465116	0.3	0.0204082	0.0555556	0.325581	0.209302	0.431818	0.191489	0.0754717	0.0569106	0.159664	0.209677	0.413043	0.372881	0.170455	0.530612	0.302326	0.22	0.0655738	0.112676	0.0408163	0.22973	0.463415	0.0392157	0.0526316	0.101695	0.357143	1	0.0625	0.0782609
UCS_M702	0.5625	0.285714	0.36	0.241379	0	0.0769231	0.333333	0.352941	0.307692	0.08	0.03125	0.0434783	0.0655738	0.15	0.222222	0.263158	0.4375	0.3125	0.285714	0.28	0.0588235	0.111111	0.0285714	0.142857	0.291667	0.0909091	0.0689655	0.0909091	0.12	1	0.047619	0.0689655
BLCA_M553	1	0.378378	0.289474	0.217391	0	0.0555556	0.162162	0.175	0.384615	0.166667	0.131579	0.0806452	0.192308	0.145455	0.307692	0.425532	0.126582	0.525	0.166667	0.119048	0.15625	0.171429	0.0357143	0.193548	0.314286	0.0540541	0.0425532	0.0434783	0.357143	0.269231	0.111111	0.145833
BLCA_M156	1	0.675676	0.627907	0.025641	0.411765	0.047619	0.104167	0.354167	0.4375	0.0681818	0.6	0.056266	0.477273	0.0887574	0.6	0.466667	0.5	0.558824	0.533333	0.40625	0.55814	0.28125	0.393939	0.176471	0.258065	0.0789474	0.395349	0.0298507	0.465116	0.0512821	0.047619	0.037037
BRCA_M1180	0.387097	1	0.481481	0.0344828	0.269231	0	0.0857143	0.4	0.107143	0.0384615	0.28125	0.0205128	0.285714	0.0304878	0.375	0.16	0.255814	0.1875	0.24	0.291667	0.388889	0.0512821	0.148148	0.0246305	0.0505051	0.04	0.097561	0.0384615	0.230769	0.04	0	0
BRCA_M139	0.675676	1	0.681818	0.0232558	0.368421	0.0434783	0.0961538	0.38	0.388889	0.0625	0.578947	0.0530303	0.5	0.0833333	0.575758	0.371429	0.489796	0.5	0.515152	0.46875	0.651163	0.25	0.388889	0.0607477	0.228571	0.0714286	0.454545	0.0322581	0.456522	0.0487805	0.0434783	0.0352941
BRCA_M571	0.34375	1	0.380952	0.0416667	0.222222	0.0740741	0.0555556	0.136364	0.409091	0.103448	0.55	0.0310881	0.351351	0.0432099	0.32	0.380952	0.255814	0.407407	0.47619	0.304348	0.333333	0.0434783	0.409091	0.0405405	0.111111	0.0833333	0.40625	0.0384615	0.3	0.0434783	0.0740741	0.0454545
BRCA_M572	0.411765	1	0.666667	0.0294118	0.266667	0	0.075	0.32	0.16129	0.0487805	0.277778	0.0333333	0.322581	0.0857143	0.407407	0.172414	0.282609	0.228571	0.241379	0.285714	0.357143	0.0454545	0.16129	0.25	0.0480769	0.0333333	0.162791	0.0322581	0.261905	0.0434783	0	0
CESC_M639	0.257143	0.380952	1	0.0384615	0.172414	0.133333	0.0714286	0.209302	0.454545	0.1	0.454545	0.0425532	0.45	0.0559006	0.172414	0.363636	0.222222	0.3	0.333333	0.291667	0.232558	0.227273	0.28	0.04	0.0869565	0.08	0.314286	0.1	0.37931	0.0416667	0.0714286	0.0447761
CESC_M640	0.486486	0.666667	1	0.025	0.25	0.027027	0.0869565	0.377778	0.194444	0.0449438	0.358974	0.0353535	0.371429	0.097561	0.451613	0.205882	0.32	0.315789	0.264706	0.318182	0.52381	0.0816327	0.228571	0.233333	0.0545455	0.0183486	0.23913	0.03125	0.304348	0.0394737	0	0.027027
CESC_M95	0.627907	0.681818	1	0.0192308	0.304348	0.0909091	0.0833333	0.350877	0.414634	0.0535714	0.545455	0.0572139	0.480769	0.0888889	0.463415	0.365854	0.472727	0.477273	0.414634	0.478261	0.680851	0.0625	0.348837	0.181818	0.186047	0.06	0.44	0.0945946	0.5	0.0444444	0.037037	0.0322581
COAD_M282	0.411765	0.368421	0.304348	0.030303	1	0.0625	0.075	0.32	0.384615	0.0571429	0.393939	0.0333333	0.25	0.0609756	0.407407	0.416667	0.255319	0.34375	0.44	0.333333	0.295455	0.631579	0.285714	0.111111	0.0480769	0	0.25	0.0294118	0.472222	0.0588235	0	0.0422535
COAD_M543	0.235294	0.230769	0.181818	0	1	0	0.0571429	0.166667	0.2	0	0.212121	0.0179487	0.129032	0.0306748	0.230769	0.166667	0.152174	0.15625	0.25	0.25	0.159091	0.470588	0.153846	0.0197044	0.040404	0	0.1	0.0177515	0.342857	0.03125	0	0
GBM_M1613	0.34375	0.4	0.333333	0.0344828	0.32	0.04	0.0857143	1	0.192308	0.0253165	0.28125	0.0205128	0.2	0.0304878	0.434783	0.208333	0.255814	0.225806	0.148148	0.291667	0.315789	0	0.192308	0.190476	0.04	0.04	0.153846	0.0384615	0.2	0.046875	0	0.04
HNSC_M377	0.4375	0.409091	0.454545	0.03125	0.384615	0.0666667	0.0789474	0.232558	1	0.0606061	0.478261	0.0408163	0.358974	0.075	0.44	0.6	0.390244	0.576923	0.478261	0.258065	0.410256	0.318182	0.416667	0.12	0.227273	0.115385	0.454545	0.0363636	0.4	0.0606061	0.0666667	0.0434783
KIRC_M1045	0.4375	0.55	0.454545	0.0357143	0.333333	0.125	0.0512821	0.177778	0.478261	0.09375	1	0.0388601	0.409091	0.068323	0.44	0.52381	0.295455	0.518519	0.478261	0.258065	0.341463	0.318182	0.307692	0.0454545	0.0862069	0.115385	0.411765	0.0754717	0.5	0.0447761	0.0666667	0.0434783
KIRC_M433	0.6	0.578947	0.545455	0.027027	0.393939	0.0952381	0.108696	0.3125	0.419355	0.0714286	1	0.0538462	0.465116	0.0898204	0.586207	0.448276	0.395833	0.59375	0.517241	0.419355	0.477273	0.0277778	0.375	0.1875	0.275862	0.114286	0.45	0.0634921	0.487805	0.0526316	0.05	0.0379747
LGG_M267	0.264706	0.333333	0.45	0.037037	0.178571	0.179487	0.115385	0.243902	0.347826	0.103448	0.409091	0.0512821	1	0.153846	0.178571	0.380952	0.173913	0.266667	0.192308	0.304348	0.181818	0.181818	0.291667	0.0604027	0.0759494	0.0833333	0.323529	0.125	0.392857	0.04	0	0.0454545
LGG_M268	0.307692	0.410256	0.371429	0.030303	0.171429	0.031746	0.121951	0.288889	0.181818	0.0322581	0.289474	0.0278481	1	0.0512821	0.28125	0.193548	0.24	0.210526	0.344828	0.258065	0.395349	0.0277778	0.21875	0.222222	0.185185	0.0263158	0.232558	0.0333333	0.166667	0.0416667	0	0.0294118
LGG_M46	0.477273	0.5	0.480769	0.0212766	0.25	0.114754	0.0909091	0.263158	0.358974	0.0588235	0.465116	0.05	1	0.0833333	0.341463	0.378378	0.357143	0.363636	0.394737	0.426471	0.510204	0.0406504	0.358974	0.146341	0.0789474	0.0666667	0.456522	0.117647	0.372549	0.0470588	0	0.045977
LUAD_M119	0.6	0.575758	0.463415	0.030303	0.407407	0.0625	0.075	0.434783	0.44	0.0571429	0.586207	0.0413437	0.341463	0.0674847	1	0.478261	0.475	0.482759	0.5	0.333333	0.5	0.291667	0.44	0.2	0.208333	0.0689655	0.351351	0.0322581	0.333333	0.0588235	0	0.0384615
LUSC_M1053	0.466667	0.380952	0.365854	0.0344828	0.416667	0.0714286	0.0540541	0.214286	0.6	0.1	0.52381	0.0425532	0.380952	0.0759494	0.478261	1	0.341463	0.5	0.52381	0.263158	0.358974	0.285714	0.454545	0.0460526	0.190476	0.125	0.4375	0.0377358	0.37931	0.0461538	0	0.0447761
MESO_M80	0.5	0.489796	0.472727	0.0196078	0.255319	0.0588235	0.0847458	0.357143	0.390244	0.0490196	0.395833	0.049505	0.357143	0.0773481	0.475	0.341463	1	0.391304	0.357143	0.383562	0.471698	0.181818	0.295455	0.108696	0.162791	0.04	0.365385	0.0526316	0.326531	0.0449438	0.0377358	0.0273973
OV_M675	0.558824	0.5	0.477273	0.030303	0.34375	0.0540541	0.116279	0.25	0.576923	0.0769231	0.59375	0.0461538	0.363636	0.0783133	0.482759	0.5	0.391304	1	0.464286	0.328125	0.44186	0.285714	0.413793	0.129032	0.416667	0.125	0.447368	0.0322581	0.441176	0.0547945	0.0540541	0.0394737
PAAD_M582	0.533333	0.515152	0.414634	0.037037	0.44	0.0666667	0.108108	0.232558	0.478261	0.09375	0.517241	0.0415584	0.394737	0.068323	0.5	0.52381	0.357143	0.464286	1	0.258065	0.410256	0.45	0.478261	0.166667	0.285714	0.115385	0.371429	0.0275229	0.378378	0.0606061	0.0666667	0.0434783
PCPG_M96	0.40625	0.46875	0.478261	0.0441176	0.212121	0.179775	0.117647	0.347518	0.258065	0.0578512	0.419355	0.0520095	0.426471	0.149254	0.290323	0.245902	0.383562	0.328125	0.258065	1	0.414286	0.0699301	0.238095	0.125	0.111111	0.057971	0.460317	0.188235	0.438356	0.0416667	0.0142857	0.0416667
PRAD_M287	0.55814	0.651163	0.680851	0	0.295455	0.0392157	0.107143	0.37037	0.410256	0.0566038	0.477273	0.0523691	0.510204	0.0782123	0.5	0.358974	0.471698	0.44186	0.410256	0.414286	1	0.190476	0.341463	0.166667	0.2	0.0638298	0.4375	0.04	0.411765	0.045977	0.0392157	0.0333333
READ_M382	0.28125	0.25	0.227273	0.0384615	0.631579	0.08	0.0588235	0.116279	0.318182	0.0714286	0.318182	0.0232558	0.181818	0.0372671	0.291667	0.285714	0.181818	0.285714	0.45	0.153846	0.190476	1	0.26087	0.0416667	0.0408163	0.142857	0.162162	0.0294118	0.352941	0.0483871	0	0.046875
SARC_M1055	0.393939	0.409091	0.348837	0.037037	0.285714	0.0666667	0.0789474	0.204545	0.416667	0.09375	0.375	0.0408163	0.358974	0.068323	0.44	0.454545	0.295455	0.413793	0.478261	0.269231	0.341463	0.26087	1	0.217391	0.173913	0.115385	0.371429	0.0273973	0.342105	0.0447761	0	0.0434783
STAD_M774	0.258065	0.228571	0.186047	0.05	0.0107991	0.0434783	0.172414	0.15	0.227273	0.0266667	0.275862	0.0180879	0.185185	0.0357143	0.208333	0.190476	0.162791	0.416667	0.285714	0.195652	0.2	0.0571429	0.173913	0.02	1	0.157895	0.171429	0.0180723	0.222222	0.047619	0	0.0416667
THCA_M111	0.395349	0.454545	0.44	0.025	0.25	0.190476	0.1	0.259259	0.454545	0.0652174	0.45	0.0453401	0.456522	0.146341	0.351351	0.4375	0.365385	0.447368	0.371429	0.460317	0.4375	0.162162	0.371429	0.105263	0.171429	0.0487805	1	0.20339	0.413043	0.097561	0.025	0.0447761
UCEC_M1223	0.421053	0.380952	0.404255	0.0606061	0.333333	0.189189	0.0810811	0.24	0.4	0.075	0.5	0.0407125	0.392857	0.108108	0.333333	0.37931	0.326531	0.441176	0.354839	0.365079	0.3125	0.275862	0.3125	0.0631068	0.0597015	0.0882353	0.365854	0.140351	1	0.0331126	0.0526316	0.038961
UCEC_M302	0.377358	0.375	0.416667	0.0384615	0.369565	0.245902	0.204082	0.300752	0.270833	0.0657895	0.392157	0.0597015	0.311475	0.2	0.26	0.255319	0.272727	0.333333	0.297872	0.438356	0.344262	0.272727	0.270833	0.126761	0.196721	0.117647	0.388889	0.235294	1	0.0740741	0.0350877	0.0641026
UCEC_M828	0.465116	0.456522	0.5	0.047619	0.472222	0.152174	0.0943396	0.272727	0.342105	0.0631579	0.487805	0.047619	0.372549	0.0869565	0.325	0.324324	0.321429	0.414634	0.378378	0.41791	0.411765	0.352941	0.342105	0.184211	0.222222	0.0697674	0.413043	0.121212	1	0.0357143	0.0425532	0.0348837
BLCA_M175	1	0.319149	0.275449	0.207921	0	0.0232558	0.2	0.0641026	0.305882	0.34965	0.315217	0.19802	0.109589	0.389474	0.451327	0.44	0.164384	0.2625	0.202703	0.109589	0.309211	0.347561	0.292135	0.367742	0.298701	0.142857	0.039801	0.0387097	0.457143	0.346939	0.133929	0.238806
BRCA_M265	0.227586	1	0.209677	0.0649351	0	0.0224215	0.28	0.0504202	0.261538	0.263441	0.124138	0.131148	0.0606061	0.330769	0.401361	0.248062	0.0866142	0.246269	0.133333	0.0512821	0.259542	0.258373	0.127119	0.314554	0.253521	0.0603448	0.0246305	0.0318471	0.289773	0.237113	0.18797	0.168539
BRCA_M269	0.319149	1	0.157143	0.182796	0	0.027027	0.241379	0.0512821	0.245902	0.206667	0.184783	0.1	0.078125	0.323529	0.366197	0.411765	0.123077	0.219178	0.241935	0.112903	0.222222	0.208092	0.271605	0.244681	0.313433	0.0793651	0.0307692	0.0253165	0.255556	0.222222	0.161616	0.140741
CESC_M31	0.235294	0.287356	1	0.0357143	0	0.0384615	0.276596	0.1	0.446154	0.258065	0.215385	0.192982	0.084507	0.413043	0.466667	0.358209	0.302326	0.135417	0.347826	0.117647	0.37931	0.346154	0.431818	0.162791	0.409836	0.075	0.0533333	0.0574713	0.180328	0.1875	0.153846	0.311111
HNSC_M172	0.37037	0.259259	0.304348	0.36	0	0.04	0.171429	0.09375	1	0.16129	0.178571	0.242424	0.0967742	0.384615	0.418605	0.395349	0.233333	0.375	0.322581	0.1	0.243243	0.3	0.32	0.191176	0.212121	0.103448	0.0540541	0.027027	0.262295	0.259259	0.140625	0.153846
HNSC_M94	0.375	0.354839	0.446154	0.046875	0.015873	0.0315789	0.257862	0.078125	1	0.164557	0.177215	0.188406	0.105263	0.376471	0.415584	0.46875	0.22807	0.14433	0.310345	0.0970149	0.434211	0.292308	0.305085	0.197861	0.370787	0.0983607	0.0449438	0.049505	0.211268	0.267606	0.150442	0.216667
KICH_M656	0.34965	0.263441	0.261682	0.154839	0	0.023622	0.178261	0.0328467	0.2	1	0.210884	0.163399	0.0697674	0.235294	0.407643	0.18705	0.109375	0.221477	0.131783	0.0866142	0.242718	0.317536	0.202797	0.353211	0.184049	0.0703125	0.027027	0.0283019	0.3125	0.342105	0.148148	0.198925
LIHC_M240	0.297297	0.197531	0.413043	0.075	0	0.0540541	0.216216	0.142857	0.344828	0.235294	0.233333	0.232558	0.107143	1	0.378378	0.203704	0.242424	0.121951	0.285714	0.0825688	0.3	0.309524	0.333333	0.129032	0.339623	0.0923077	0.0540541	0.0694444	0.1875	0.196078	0.153846	0.257143
LIHC_M480	0.36	0.323529	0.204082	0.297297	0	0.0333333	0.315789	0.0652174	0.384615	0.230769	0.208333	0.145833	0.119048	1	0.415094	0.45098	0.159091	0.288462	0.341463	0.146341	0.25	0.232558	0.265625	0.240964	0.294118	0.179487	0.0465116	0.0350877	0.358209	0.2	0.107143	0.157895
LUAD_M185	0.379747	0.366197	0.2	0.202532	0	0.0338983	0.265306	0.0566038	0.418605	0.22619	0.220779	0.169811	0.0588235	0.415094	1	0.5	0.137255	0.321429	0.265306	0.173913	0.267857	0.304348	0.275362	0.291139	0.297872	0.12766	0.04	0.03125	0.324324	0.24	0.105882	0.110294
LUAD_M186	0.258065	0.386555	0.338028	0.0793651	0	0.030303	0.348485	0.09375	0.415584	0.232877	0.175	0.202899	0.0697674	0.356322	1	0.461538	0.245614	0.272727	0.262295	0.104478	0.358025	0.25	0.3	0.243094	0.396552	0.0625	0.0444444	0.0490196	0.30303	0.197368	0.176	0.213115
LUAD_M29	0.451327	0.401361	0.295238	0.181102	0	0.0245902	0.287234	0.0882353	0.327434	0.407643	0.273504	0.192	0.0686275	0.325	1	0.324324	0.142857	0.275	0.168317	0.123711	0.279661	0.360656	0.243478	0.430108	0.438596	0.0909091	0.0305344	0.034965	0.5	0.345238	0.170543	0.2125
LUAD_M545	0.324324	0.25	0.466667	0.047619	0	0.0526316	0.314286	0.138889	0.403509	0.254902	0.226415	0.255814	0.0888889	0.378378	1	0.466667	0.448276	0.144578	0.454545	0.122642	0.534884	0.365854	0.484848	0.241379	0.485714	0.0833333	0.0655738	0.0684932	0.212121	0.236842	0.151515	0.363636
LUSC_M156	0.275862	0.294737	0.358209	0.0512821	0	0.0326087	0.270968	0.0746269	0.458333	0.163934	0.168831	0.19697	0.0657895	0.295455	0.452055	1	0.240741	0.15873	0.280702	0.0992366	0.376623	0.263158	0.275862	0.169312	0.350877	0.0847458	0.0465116	0.0510204	0.208633	0.2	0.122271	0.206897
LUSC_M161	0.44	0.411765	0.181818	0.227273	0	0.0344828	0.272727	0.0784314	0.395349	0.18705	0.1625	0.150943	0.12766	0.45098	0.5	1	0.163265	0.431373	0.297872	0.12766	0.245283	0.204082	0.261905	0.231707	0.276596	0.155556	0.0408163	0.0188679	0.328767	0.270833	0.151163	0.136364
LUSC_M600	0.340426	0.253731	0.290323	0.0597015	0	0.0392157	0.270833	0.0784314	0.46875	0.176471	0.161765	0.214286	0.0769231	0.2875	0.466667	1	0.272727	0.172043	0.291667	0.0991736	0.376812	0.297872	0.3125	0.147541	0.346939	0.104167	0.0533333	0.0574713	0.180328	0.225806	0.113122	0.255319
MESO_M429	0.181818	0.153846	0.302326	0.0215054	0	0.0384615	0.181818	0.12	0.363636	0.227273	0.195652	0.222222	0.104167	0.242424	0.448276	0.272727	1	0.0897436	0.357143	0.103448	0.333333	0.243243	0.392857	0.181818	0.4	0.115385	0.0714286	0.0793651	0.217391	0.238095	0.137931	0.296296
OV_M527	0.282051	0.297872	0.194444	0.146341	0	0.0238095	0.225	0.0324324	0.261905	0.144578	0.131579	0.148936	0.0952381	0.288462	0.4	0.431373	0.0638298	1	0.227273	0.15	0.188679	0.155556	0.277778	0.172414	0.181818	0.125	0.047619	0.0217391	0.216216	0.170732	0.0697674	0.131579
PAAD_M556	0.363636	0.160494	0.347826	0.0526316	0	0.0666667	0.272727	0.09375	0.310345	0.22449	0.196078	0.136364	0.0925926	0.27027	0.454545	0.291667	0.357143	0.109756	1	0.0952381	0.291667	0.346154	0.363636	0.185185	0.333333	0.0666667	0.0701754	0.0882353	0.241379	0.234043	0.107692	0.242424
PRAD_M275	0.3	0.322917	0.338028	0.030303	0	0.0298507	0.218182	0.09375	0.434211	0.177215	0.205128	0.220588	0.103896	0.311111	0.421053	0.376812	0.245614	0.108911	0.241935	0.0962963	1	0.25	0.344828	0.153846	0.366667	0.0793651	0.0430108	0.0490196	0.175676	0.197368	0.12987	0.193548
PRAD_M661	0.26	0.217391	0.37931	0.0357143	0	0.0298507	0.25	0.122449	0.342857	0.21875	0.234375	0.236364	0.084507	0.3	0.534884	0.358209	0.333333	0.10101	0.291667	0.108333	1	0.272727	0.369565	0.162791	0.404255	0.0617284	0.0512821	0.0574713	0.180328	0.22	0.153846	0.255319
SARC_M69	0.210526	0.206897	0.431818	0.06	0	0.0571429	0.228571	0.0909091	0.37037	0.244898	0.215686	0.214286	0.0714286	0.333333	0.484848	0.3125	0.392857	0.108434	0.363636	0.126214	0.369565	0.292683	1	0.137931	0.4	0.0645161	0.0689655	0.0416667	0.166667	0.257143	0.123077	0.4
SKCM_M319	0.367742	0.282828	0.256522	0.151163	0	0.0265487	0.208333	0.0529801	0.214286	0.351759	0.238994	0.158824	0.0682731	0.283951	0.428571	0.218543	0.0878378	0.211009	0.107383	0.0902778	0.29717	0.375	0.232258	1	0.204545	0.0684932	0.0288809	0.025974	0.338462	0.343137	0.15894	0.247423
SKCM_M41	0.352273	0.314554	0.245059	0.137056	0	0.0251046	0.239216	0.0451977	0.197861	0.353211	0.205405	0.137755	0.0656934	0.258065	0.430108	0.193182	0.0809249	0.226744	0.101124	0.0764706	0.275424	0.351464	0.198895	1	0.246073	0.0581395	0.0264026	0.0233463	0.334884	0.357466	0.178683	0.229358
STAD_M265	0.254545	0.229167	0.409836	0.0989011	0	0.0344828	0.269231	0.173077	0.351351	0.183099	0.197183	0.254237	0.0779221	0.339623	0.42	0.310811	0.24	0.138614	0.283019	0.103175	0.387097	0.288136	0.301887	0.2	1	0.0952381	0.0493827	0.0537634	0.234848	0.175439	0.156627	0.25
STAD_M29	0.246575	0.261261	0.317073	0.109091	0	0.034188	0.244186	0.121622	0.370787	0.184049	0.150538	0.21519	0.0769231	0.284314	0.438596	0.337079	0.183099	0.155235	0.216216	0.0878378	0.366667	0.209877	0.22973	0.246073	1	0.0754717	0.038835	0.0434783	0.267123	0.178571	0.141667	0.191781
STAD_M814	0.25641	0.22807	0.346939	0.0540541	0.0263158	0.0277778	0.241379	0.108108	0.333333	0.185185	0.226415	0.227273	0.0888889	0.275	0.485714	0.350877	0.4	0.130952	0.333333	0.101852	0.404255	0.272727	0.4	0.16129	1	0.0491803	0.0655738	0.0684932	0.142857	0.27027	0.134328	0.323529
UCEC_M1062	0.420455	0.255556	0.261538	0.247191	0	0.0361446	0.15873	0.0588235	0.262295	0.272727	0.264368	0.182796	0.0769231	0.359551	0.378378	0.328767	0.174603	0.216216	0.164179	0.147541	0.296875	0.272727	0.238095	0.298969	0.219178	0.131148	0.0461538	0.037037	1	0.289655	0.11194	0.148148
UCEC_M114	0.360294	0.289773	0.235849	0.155405	0.0186335	0.0223464	0.179372	0.0645161	0.185185	0.301075	0.205674	0.148649	0.0833333	0.239726	0.5	0.23622	0.107438	0.2	0.108527	0.0743802	0.215686	0.298077	0.214815	0.338462	0.267123	0.0840336	0.0397351	0.0275862	1	0.279793	0.133333	0.174863
UCEC_M505	0.457143	0.236842	0.263736	0.198276	0	0.027027	0.147727	0.0526316	0.219048	0.3125	0.254545	0.179487	0.0769231	0.307018	0.436508	0.28866	0.133333	0.234783	0.132653	0.101124	0.255814	0.314917	0.281553	0.308571	0.231579	0.114943	0.0340136	0.0291971	1	0.30303	0.120253	0.180645
BLCA_M177	1	0.494949	0.481481	0.242857	0	0.173913	0.413793	0.181818	0.288462	0.291667	0.163636	0.28	0.5	0.386555	0.61039	0.630137	0.405405	0.315217	0.327586	0.47541	0.177419	0.349206	0.254545	0.373626	0.365079	0.160714	0.0454545	0.06	0.5	0.316456	0.238095	0.191176
BLCA_M728	1	0.28125	0.4	0.272727	0	0.111111	0.253968	0.175	0.47619	0.205128	0.222222	0.263158	0.48	0.237288	0.409091	0.340426	0.245283	0.225806	0.4375	0.32	0.266667	0.407407	0.129032	0.218182	0.375	0.259259	0.0344828	0.056338	0.40625	0.258621	0.146789	0.219512
BRCA_M266	0.494949	1	0.291667	0.190909	0	0.106195	0.444444	0.119266	0.181818	0.302198	0.0909091	0.206897	0.270833	0.48227	0.527273	0.429825	0.298246	0.330645	0.289256	0.300971	0.141667	0.445946	0.153061	0.333333	0.27451	0.112245	0.0309735	0.0487805	0.432	0.286957	0.234568	0.157407
CESC_M448	0.481481	0.297872	1	0.3125	0	0.212766	0.264706	0.189189	0.433333	0.285714	0.25	0.341463	0.517241	0.403509	0.388889	0.590909	0.351852	0.357143	0.514286	0.404255	0.232143	0.278689	0.322581	0.311688	0.589744	0.171429	0.06	0.0649351	0.385965	0.355932	0.2	0.23913
ESCA_M342	0.413793	0.444444	0.238938	0.15748	0	0.0930233	1	0.104	0.194245	0.271357	0.0785714	0.147059	0.232143	0.380368	0.40458	0.398438	0.242424	0.321168	0.228571	0.229508	0.201439	0.385542	0.131579	0.272727	0.237288	0.106195	0.0280612	0.0444444	0.344828	0.293103	0.186813	0.137097
HNSC_M1237	0.47619	0.153846	0.266667	0.216216	0	0.0833333	0.166667	0.181818	1	0.125	0.235294	0.193548	0.368421	0.148148	0.538462	0.466667	0.107143	0.227273	0.346154	0.222222	0.285714	0.285714	0.0454545	0.121622	0.368421	0.210526	0.047619	0.03125	0.214286	0.208333	0.0754717	0.166667
HNSC_M571	0.354839	0.322581	0.324324	0.191489	0	0.0638298	0.234375	0.146341	1	0.175	0.142857	0.2	0.321429	0.237288	0.347826	0.32	0.123077	0.357143	0.4375	0.269231	0.266667	0.225806	0.0857143	0.189873	0.375	0.259259	0.0444444	0.0319149	0.2	0.258621	0.106195	0.162791
HNSC_M573	0.37037	0.170732	0.433333	0.24	0	0.222222	0.269231	0.217391	1	0.208333	0.285714	0.18	0.291667	0.218182	0.4	0.409091	0.25	0.294118	0.25	0.204545	0.181818	0.173913	0.473684	0.173077	0.25641	0.181818	0.0810811	0.0869565	0.245283	0.218182	0.101852	0.238095
LGG_M306	0.5	0.270833	0.421053	0.22	0	0.145833	0.272727	0.181818	0.285714	0.238095	0.225806	0.325	1	0.25641	0.361111	0.367647	0.278689	0.202532	0.378378	0.422222	0.162162	0.228571	0.30303	0.253165	0.333333	0.21875	0.0540541	0.0810811	0.313253	0.3	0.171171	0.25
LGG_M825	0.48	0.285714	0.517241	0.243902	0	0.184211	0.289474	0.185185	0.368421	0.235294	0.272727	0.387097	1	0.236364	0.3	0.4	0.22	0.269231	0.518519	0.4	0.227273	0.269231	0.115385	0.219178	0.388889	0.26087	0.0416667	0.0447761	0.333333	0.346154	0.142857	0.25
LIHC_M234	0.350649	0.37037	0.403509	0.279412	0	0.140845	0.261538	0.12069	0.237288	0.20625	0.142857	0.274194	0.238095	1	0.362637	0.382353	0.276316	0.390805	0.305085	0.304348	0.177215	0.336449	0.160714	0.259259	0.409836	0.12069	0.0405405	0.06	0.355263	0.283951	0.2	0.208955
LIHC_M25	0.386555	0.48227	0.236842	0.165354	0.0193548	0.0923077	0.380368	0.103175	0.145299	0.27	0.0775862	0.189394	0.230088	1	0.423077	0.384615	0.269231	0.263889	0.22695	0.247934	0.132353	0.383234	0.130435	0.287582	0.225	0.0956522	0.0288066	0.0441989	0.380282	0.248963	0.219101	0.154472
LUAD_M183	0.409091	0.153846	0.225806	0.125	0	0.0540541	0.217391	0.0909091	0.538462	0.176471	0.166667	0.15625	0.3	0.107143	1	0.222222	0.0877193	0.227273	0.25	0.157895	0.227273	0.285714	0.0434783	0.0980392	0.368421	0.15	0.00837989	0.03125	0.133333	0.127273	0.0666667	0.166667
LUAD_M28	0.61039	0.527273	0.388889	0.229885	0	0.134831	0.40458	0.152941	0.208333	0.286765	0.12	0.274725	0.361111	0.423077	1	0.597701	0.393258	0.317757	0.32	0.358025	0.177083	0.366906	0.186667	0.368421	0.358974	0.118421	0.037037	0.0571429	0.47619	0.265306	0.266187	0.202381
LUSC_M1311	0.32	0.230769	0.290323	0.175	0	0.108108	0.2	0.272727	0.466667	0.151515	0.333333	0.181818	0.4	0.163636	0.25	1	0.163265	0.205882	0.233333	0.219512	0.210526	0.208333	0.0740741	0.208333	0.333333	0.25	0.0434783	0.0352941	0.16129	0.347826	0.104762	0.15
LUSC_M1312	0.310345	0.166667	0.333333	0.185185	0	0.125	0.36	0.16	0.409091	0.2	0.0769231	0.132075	0.103448	0.192982	0.285714	1	0.173077	0.25	0.205882	0.148936	0.0961538	0.217391	0.45	0.148148	0.219512	0.125	0.0789474	0.0833333	0.218182	0.130435	0.0810811	0.173913
LUSC_M141	0.630137	0.429825	0.397059	0.2	0	0.142857	0.398438	0.1625	0.223881	0.268657	0.128571	0.247191	0.367647	0.384615	0.597701	1	0.4	0.283019	0.282828	0.381579	0.173913	0.34058	0.217391	0.4	0.311688	0.111111	0.038835	0.0514706	0.456311	0.265957	0.248175	0.170732
LUSC_M573	0.446154	0.301887	0.590909	0.283333	0	0.183333	0.252033	0.170213	0.295455	0.259259	0.2	0.264706	0.348837	0.382353	0.443038	1	0.359375	0.339623	0.395833	0.333333	0.238806	0.314286	0.222222	0.337209	0.461538	0.122449	0.046875	0.0535714	0.409091	0.305556	0.206612	0.20339
MESO_M82	0.405405	0.298246	0.333333	0.191781	0.0228571	0.140845	0.242424	0.147059	0.218182	0.258065	0.142857	0.21519	0.278689	0.269231	0.393258	0.4	1	0.35	0.244444	0.304348	0.140625	0.223022	0.15	0.295238	0.30303	0.105263	0.031746	0.0578512	0.373333	0.209302	0.19084	0.208955
PAAD_M1091	0.4375	0.25	0.514286	0.22449	0	0.148936	0.238806	0.138889	0.4375	0.214286	0.193548	0.333333	0.518519	0.305085	0.310345	0.395833	0.206897	0.3125	1	0.321429	0.3125	0.235294	0.1875	0.240506	0.512821	0.1875	0.0408163	0.0606061	0.361111	0.305085	0.162162	0.2
PAAD_M1394	0.333333	0.230769	0.433333	0.190476	0	0.157895	0.230769	0.192308	0.285714	0.26087	0.285714	0.3125	0.47619	0.218182	0.4	0.295455	0.176471	0.28	1	0.285714	0.230769	0.230769	0.217391	0.173333	0.361111	0.217391	0.0384615	0.0869565	0.392857	0.259259	0.122642	0.189189
PCPG_M94	0.47541	0.300971	0.404255	0.216667	0.0204082	0.175439	0.229508	0.163636	0.229167	0.230769	0.162791	0.27451	0.422222	0.304348	0.358025	0.381579	0.304348	0.258824	0.3125	1	0.19697	0.222222	0.186047	0.305882	0.333333	0.159091	0.0408163	0.0555556	0.328358	0.304348	0.193277	0.139535
READ_M1631	0.407407	0.193548	0.25	0.238095	0.0263158	0.0952381	0.171875	0.153846	0.285714	0.228571	0.26087	0.257143	0.269231	0.210526	0.285714	0.255319	0.15	0.214286	0.235294	0.318182	0.214286	1	0.107143	0.188679	0.214286	0.153846	0.04	0.0333333	0.28125	0.2	0.110092	0.2
READ_M340	0.3	0.406015	0.239583	0.166667	0.0272727	0.100917	0.326797	0.103774	0.166667	0.221053	0.0957447	0.205357	0.158416	0.336449	0.325203	0.284553	0.214286	0.269841	0.247934	0.205607	0.147826	1	0.106383	0.261538	0.22549	0.11828	0.0314961	0.0388889	0.290909	0.254386	0.203704	0.121495
READ_M36	0.349206	0.445946	0.186992	0.141791	0.0238095	0.0808824	0.385542	0.0992366	0.130081	0.257282	0.0743802	0.165468	0.2	0.383234	0.366906	0.34058	0.223022	0.241611	0.219178	0.209302	0.119718	1	0.115702	0.264901	0.178295	0.10084	0.0302267	0.038835	0.313725	0.238866	0.2	0.113636
SARC_M79	0.4	0.206897	0.322581	0.115385	0	0.2	0.347826	0.115385	0.473684	0.285714	0.0869565	0.190476	0.115385	0.160714	0.269231	0.45	0.16	0.235294	0.227273	0.2	0.0909091	0.25	1	0.146667	0.205128	0.2	0.0857143	0.0952381	0.230769	0.160714	0.0833333	0.263158
STAD_M52	0.375	0.313725	0.589744	0.301887	0	0.188679	0.264151	0.146341	0.375	0.22449	0.210526	0.270833	0.388889	0.409836	0.358974	0.461538	0.316667	0.369565	0.512821	0.333333	0.25	0.235294	0.205128	0.296703	1	0.146341	0.0535714	0.060241	0.349206	0.323077	0.169492	0.26
UCEC_M1044	0.40625	0.188119	0.368421	0.18	0.025	0.12766	0.166667	0.142857	0.21875	0.25	0.2	0.259259	0.333333	0.206349	0.263158	0.375	0.254545	0.204545	0.392857	0.265306	0.205882	0.28125	0.193548	0.22807	0.26087	0.121212	0.0327869	0.0625	1	0.206349	0.153153	0.204545
UCEC_M112	0.5	0.432	0.290698	0.168317	0	0.12	0.344828	0.123711	0.181818	0.256757	0.104651	0.221154	0.313253	0.380282	0.47619	0.456311	0.323529	0.288136	0.276786	0.301075	0.148148	0.313725	0.156627	0.325397	0.285714	0.103448	0.0336134	0.0460526	1	0.273585	0.214286	0.178947
UCEC_M500	0.471429	0.373832	0.385965	0.211268	0.0232558	0.176471	0.293651	0.132353	0.245283	0.305085	0.145455	0.266667	0.283333	0.355263	0.447059	0.439024	0.391304	0.333333	0.305882	0.328358	0.164557	0.290909	0.230769	0.35	0.349206	0.122807	0.045977	0.05	1	0.303797	0.220472	0.230769
BLCA_M230	1	0.265306	0.301887	0.290323	0.288136	0.0410959	0.513889	0.25	0.466667	0.10101	0.141026	0.0307692	0.157895	0.189655	0.537037	0.5	0.211538	0.372549	0.314815	0.0285714	0.0263158	0.220588	0.480769	0.322034	0.333333	0.245283	0.0327869	0.0175439	0.046875	0.271605	0.037037	0.35
BLCA_M879	1	0.176471	0.352941	0.137255	0.384615	0.0277778	0.46875	0.371429	0.5	0.121212	0.196429	0.15625	0.121212	0.258065	0.452381	0.484848	0.366667	0.394737	0.314286	0.0416667	0.037037	0.285714	0.410256	0.28125	0.282051	0.375	0.0512821	0.025	0.0566038	0.292683	0.0307692	0.27907
BLCA_M880	1	0.241379	0.434783	0.344828	0.0555556	0.0416667	0.220588	0.076087	0.357143	0.0606061	0.1	0.0363636	0.176471	0.228571	0.212766	0.36	0.0857143	0.375	0.285714	0.0285714	0.0322581	0.152174	0.214286	0.15625	0.21875	0.0466667	0.027027	0.0322581	0.0454545	0.105263	0.0357143	0.204545
BRCA_M782	0.265306	1	0.315789	0.238095	0.153846	0.05	0.4	0.0705882	0.2	0.0869565	0.0909091	0.0869565	0.103448	0.285714	0.470588	0.5	0.0714286	0.5	0.48	0.0909091	0.0434783	0.184211	0.388889	0.272727	0.266667	0.142857	0.0384615	0.04	0.0555556	0.263158	0.0638298	0.290323
CESC_M1370	0.434783	0.315789	1	0.272727	0.08	0.0540541	0.25	0.060241	0.35	0.0555556	0.0625	0.047619	0.0810811	0.142857	0.4	0.277778	0.125	0.434783	0.416667	0.0322581	0.05	0.135135	0.212121	0.130435	0.166667	0.047619	0.0416667	0.0454545	0.0606061	0.107143	0.0681818	0.233333
CESC_M680	0.433333	0.229167	1	0.1875	0.0571429	0.0425532	0.166667	0.0689655	0.321429	0.0909091	0.0684932	0.0666667	0.243243	0.354839	0.24	0.178571	0.222222	0.30303	0.294118	0.03125	0.0333333	0.216667	0.206897	0.0909091	0.117647	0.0469799	0.030303	0.0645161	0.0465116	0.28125	0.0555556	0.305556
COAD_M281	0.384615	0.0819672	0.3	0.132075	1	0.0192308	0.361111	0.219512	0.333333	0.114286	0.189655	0.0363636	0.0701754	0.079646	0.340426	0.416667	0.30303	0.375	0.2	0.0222222	0.0277778	0.236842	0.325581	0.34375	0.238095	0.243243	0.047619	0	0.0612245	0.25	0.0298507	0.212766
COAD_M541	0.266667	0.0434783	0.185185	0.0645161	1	0	0.269231	0.259259	0.209302	0.0909091	0.104167	0.0454545	0.0952381	0.0909091	0.3	0.368421	0.294118	0.3	0.230769	0.0434783	0.0434783	0.24	0.444444	0.35	0.2	0.153846	0.08	0.030303	0.0315789	0.147059	0.047619	0.205882
ESCA_M119	0.315789	0.4	0.25	0.181818	0.0769231	0.05	1	0.0705882	0.173913	0.0789474	0.12	0.0869565	0.103448	0.129032	0.5625	0.578947	0.0754717	0.333333	0.275862	0.04	0.047619	0.184211	0.315789	0.318182	0.266667	0.107143	0.0384615	0.0434783	0.0416667	0.263158	0.0638298	0.25
ESCA_M120	0.46875	0.129032	0.322581	0.152174	0.361111	0.0322581	1	0.34375	0.487805	0.142857	0.148148	0.103448	0.103448	0.259259	0.346154	0.571429	0.384615	0.37931	0.366667	0.0294118	0.0333333	0.25	0.4	0.333333	0.285714	0.344828	0.0294118	0.0285714	0.0526316	0.333333	0.0333333	0.25
ESCA_M8	0.513889	0.209677	0.246154	0.223684	0.271429	0.106061	1	0.220588	0.463768	0.0892857	0.120879	0.0746269	0.0681818	0.15625	0.476923	0.492537	0.169231	0.306667	0.253731	0.140625	0.0333333	0.170732	0.384615	0.263889	0.307692	0.19697	0.0454545	0.0569106	0.0425532	0.234043	0.142857	0.247423
GBM_M167	0.371429	0.0714286	0.137931	0.102041	0.259259	0.03125	0.34375	1	0.319149	0.137931	0.235294	0.178571	0.170213	0.09375	0.44	0.451613	0.37037	0.441176	0.272727	0.037037	0.0322581	0.28125	0.384615	0.193548	0.210526	0.25	0.0882353	0.0465116	0.0384615	0.25641	0.0285714	0.275
HNSC_M136	0.5	0.2	0.363636	0.2	0.333333	0.0229885	0.487805	0.319149	1	0.108696	0.173913	0.108696	0.0895522	0.261905	0.5	0.612245	0.25	0.367347	0.363636	0.0322581	0.0416667	0.229167	0.4375	0.428571	0.333333	0.288889	0.0377358	0.0186335	0.05	0.288462	0.0253165	0.254545
LUAD_M104	0.537037	0.289474	0.341463	0.240741	0.340426	0.05	0.476923	0.266667	0.5	0.121951	0.169231	0.0952381	0.0816327	0.230769	1	0.608696	0.219512	0.461538	0.414634	0.0350877	0.0465116	0.25	0.488372	0.27451	0.282609	0.261905	0.0416667	0.0217391	0.0521739	0.304348	0.0289855	0.25
LUAD_M399	0.428571	0.037037	0.315789	0.0952381	0.3	0.0416667	0.346154	0.44	0.317073	0.136364	0.195652	0.0869565	0.136364	0.125	1	0.555556	0.380952	0.413793	0.36	0.0217391	0.0434783	0.32	0.333333	0.318182	0.1875	0.185185	0.0740741	0.0285714	0.037037	0.242424	0.037037	0.228571
LUAD_M400	0.222222	0.470588	0.222222	0.15	0.125	0.0540541	0.5625	0.060241	0.173913	0.0857143	0.105263	0.1	0.16	0.2	1	0.6875	0.0673077	0.434783	0.36	0.105263	0.05	0.2	0.466667	0.238095	0.206897	0.16	0.047619	0.0454545	0.0357143	0.4	0.05	0.233333
LUSC_M1227	0.484848	0.0571429	0.307692	0.145833	0.416667	0.030303	0.571429	0.451613	0.5	0.133333	0.254902	0.1	0.133333	0.16129	0.541667	1	0.357143	0.5625	0.34375	0.0263158	0.03125	0.3125	0.423077	0.357143	0.236842	0.28125	0.0555556	0.027027	0.0689655	0.315789	0.0322581	0.238095
LUSC_M1228	0.285714	0.5	0.227273	0.217391	0.103448	0.047619	0.578947	0.0689655	0.191489	0.075	0.0895522	0.08	0.172414	0.16	0.6875	1	0.0841121	0.407407	0.392857	0.0833333	0.04	0.205128	0.5	0.347826	0.25	0.133333	0.0357143	0.04	0.0322581	0.3	0.0612245	0.235294
LUSC_M1779	0.37931	0.037037	0.214286	0.0697674	0.368421	0.0416667	0.4	0.44	0.35	0.111111	0.170213	0.136364	0.136364	0.08	0.555556	1	0.26087	0.464286	0.36	0.0344828	0.0434783	0.32	0.333333	0.318182	0.266667	0.28	0.037037	0.0285714	0.037037	0.171429	0.04	0.264706
LUSC_M501	0.5	0.292683	0.372093	0.20339	0.367347	0.0307692	0.492537	0.297872	0.612245	0.111111	0.19403	0.111111	0.0961538	0.209302	0.608696	1	0.227273	0.375	0.319149	0.0327869	0.0425532	0.234043	0.478261	0.352941	0.369565	0.295455	0.0384615	0.0208333	0.0550459	0.27027	0.0416667	0.285714
MESO_M1234	0.366667	0.0357143	0.3	0.119048	0.30303	0.04	0.384615	0.37037	0.285714	0.130435	0.191489	0.130435	0.130435	0.166667	0.380952	0.357143	1	0.416667	0.25	0.0425532	0.0357143	0.307692	0.380952	0.304348	0.147059	0.269231	0.0714286	0.0555556	0.0412371	0.272727	0.037037	0.222222
MESO_M1605	0.241379	0.0434783	0.166667	0.0638298	0.294118	0.05	0.24	0.333333	0.162791	0.130435	0.133333	0.105263	0.105263	0.047619	0.263158	0.222222	1	0.26087	0.153846	0.047619	0.047619	0.26087	0.411765	0.190476	0.133333	0.166667	0.0869565	0.0645161	0.0333333	0.15625	0.00833333	0.21875
OV_M132	0.394737	0.0434783	0.236842	0.0925926	0.375	0.027027	0.371429	0.441176	0.367347	0.105263	0.236364	0.117647	0.132075	0.1	0.413793	0.5625	0.354839	1	0.382353	0.0444444	0.0666667	0.243243	0.28125	0.272727	0.214286	0.285714	0.05	0.0416667	0.075	0.255814	0.025641	0.244444
OV_M308	0.375	0.5	0.434783	0.258065	0.1875	0.0416667	0.333333	0.11236	0.357143	0.0833333	0.128571	0.0645161	0.111111	0.206897	0.461538	0.407407	0.0857143	1	0.5	0.0666667	0.0322581	0.177778	0.342105	0.241379	0.258065	0.176471	0.03125	0.030303	0.0697674	0.28	0.0545455	0.263158
OV_M309	0.323529	0.0526316	0.21875	0.108696	0.305556	0.0344828	0.37931	0.413793	0.311111	0.1	0.176471	0.153846	0.130435	0.103448	0.32	0.448276	0.416667	1	0.3	0.0540541	0.0810811	0.225806	0.269231	0.259259	0.194444	0.37037	0.03125	0.05	0.0606061	0.243243	0.0322581	0.230769
PAAD_M573	0.314815	0.48	0.416667	0.222222	0.181818	0.0408163	0.275862	0.0714286	0.3	0.0816327	0.126761	0.0625	0.138889	0.241379	0.414634	0.392857	0.0982143	0.5	1	0.0645161	0.0645161	0.173913	0.333333	0.233333	0.236842	0.138889	0.0375	0.0294118	0.0444444	0.269231	0.0535714	0.289474
SARC_M205	0.480769	0.30303	0.289474	0.150943	0.325581	0.0555556	0.384615	0.275	0.4375	0.111111	0.131579	0.111111	0.0689655	0.2	0.488372	0.478261	0.222222	0.342105	0.333333	0.0392157	0.0487805	0.254902	1	0.311111	0.325	0.305556	0.047619	0.0263158	0.0550459	0.272727	0.0540541	0.271429
SARC_M705	0.18	0.388889	0.192308	0.210526	0.125	0.0540541	0.315789	0.0434783	0.186047	0.0677966	0.113636	0.15	0.0740741	0.142857	0.466667	0.5	0.0571429	0.269231	0.259259	0.105263	0.105263	0.185185	1	0.238095	0.25	0.208333	0.047619	0.05	0.0384615	0.3125	0.0952381	0.126984
SARC_M706	0.37931	0.12	0.214286	0.0697674	0.444444	0.0416667	0.4	0.384615	0.317073	0.190476	0.145833	0.136364	0.0869565	0.173913	0.333333	0.423077	0.411765	0.28125	0.214286	0.037037	0.04	0.32	1	0.318182	0.1875	0.230769	0.0740741	0.0277778	0.0416667	0.28125	0.0434783	0.228571
SKCM_M126	0.322034	0.157895	0.219512	0.148148	0.26087	0.025974	0.263889	0.130435	0.428571	0.108108	0.0810811	0.0789474	0.0789474	0.131579	0.27451	0.352941	0.184211	0.240741	0.282051	0.026087	0.0344828	0.166667	0.311111	1	0.285714	0.230769	0.0465116	0.025641	0.045045	0.164384	0.047619	0.184211
BRCA_M318	0.177215	1	0.444444	0.25	0.388889	0.0350877	0.181818	0.346154	0.5	0.387097	0.526316	0.344828	0.285714	0.357143	0.416667	0.45	0.333333	0.45	0.529412	0.407407	0.478261	0.384615	0.375	0.0384615	0	0.04	0.375	0.296296	0.333333	0.275	0.277778	0.208333
BRCA_M37	0.317757	1	0.252747	0.267442	0.361111	0.0632911	0.340426	0.257576	0.263158	0.246575	0.232877	0.242857	0.273973	0.372093	0.340909	0.228261	0.2	0.138614	0.204545	0.264706	0.282353	0.183099	0.294118	0.0746988	0.0297619	0.0864198	0.247059	0.238806	0.419753	0.2375	0.220779	0.152174
CESC_M1706	0.115385	0.444444	1	0.195122	0.257143	0.0301205	0.142857	0.45	0.5	0.321429	0.4375	0.375	0.3	0.333333	0.333333	0.533333	0.243243	0.533333	0.538462	0.391304	0.4	0.304348	0.5	0.0181818	0	0.0526316	0.333333	0.380952	0.272727	0.25	0.181818	0.209302
COAD_M78	0.337349	0.388889	0.272727	0.377358	1	0.102041	0.315068	0.394737	0.416667	0.452381	0.305556	0.425	0.369565	0.442623	0.404762	0.33871	0.272727	0.27027	0.257143	0.473684	0.404762	0.35	0.37931	0.0612245	0.02	0.0740741	0.407407	0.261905	0.440678	0.408163	0.333333	0.245902
GBM_M1041	0.2	0.346154	0.45	0.288889	0.394737	0.0833333	0.208955	1	0.5	0.4375	0.28	0.5	0.411765	0.413793	0.419355	0.391304	0.222222	0.391304	0.380952	0.413793	0.37037	0.3	0.44	0.03125	0	0.075	0.270833	0.357143	0.378378	0.35	0.196078	0.244898
GBM_M430	0.216867	0.290323	0.36	0.26	0.380952	0.0731707	0.211268	1	0.413793	0.378378	0.233333	0.46875	0.358974	0.352941	0.361111	0.321429	0.22449	0.321429	0.307692	0.352941	0.361111	0.294118	0.366667	0.0410256	0	0.0666667	0.294118	0.30303	0.333333	0.340909	0.227273	0.222222
HNSC_M1390	0.205128	0.5	0.5	0.302326	0.416667	0.0571429	0.19697	0.5	1	0.466667	0.428571	0.481481	0.352941	0.625	0.521739	0.428571	0.325	0.428571	0.5	0.5	0.458333	0.275862	0.619048	0.0336788	0.0238095	0.0384615	0.311111	0.333333	0.441176	0.333333	0.236842	0.282609
KICH_M132	0.223529	0.387097	0.321429	0.32	0.452381	0.0930233	0.236111	0.4375	0.466667	1	0.37931	0.470588	0.365854	0.441176	0.368421	0.333333	0.26	0.333333	0.321429	0.53125	0.368421	0.342857	0.419355	0.0407125	0.0263158	0.0408163	0.352941	0.277778	0.404762	0.409091	0.295455	0.277778
KICH_M594	0.170732	0.296296	0.26087	0.234043	0.358974	0.0540541	0.173913	0.407407	0.44	1	0.333333	0.448276	0.297297	0.366667	0.375	0.230769	0.222222	0.230769	0.173077	0.413793	0.294118	0.21875	0.333333	0.0344828	0.0333333	0.0487805	0.270833	0.225806	0.307692	0.317073	0.25641	0.196078
KIRC_M162	0.183908	0.3125	0.245902	0.203704	0.276596	0.0322581	0.239437	0.219512	0.264706	0.292683	1	0.25641	0.341463	0.269841	0.257143	0.25	0.215686	0.21875	0.259259	0.371429	0.416667	0.314286	0.241379	0.0488432	0	0.0638298	0.236364	0.285714	0.241935	0.244898	0.302326	0.152542
KIRC_M681	0.153846	0.526316	0.4375	0.209302	0.305556	0.0295858	0.171875	0.28	0.428571	0.37931	1	0.333333	0.354839	0.296296	0.409091	0.368421	0.25641	0.368421	0.4375	0.521739	0.55	0.375	0.363636	0.0434783	0	0.0454545	0.352941	0.333333	0.285714	0.263158	0.30303	0.195652
KIRP_M197	0.219512	0.344828	0.375	0.347826	0.425	0.102564	0.268657	0.5	0.481481	0.470588	0.333333	1	0.405405	0.451613	0.371429	0.333333	0.255319	0.333333	0.32	0.5	0.454545	0.34375	0.428571	0.0411311	0	0.0681818	0.382979	0.354839	0.375	0.414634	0.3	0.27451
LGG_M120	0.261905	0.285714	0.338983	0.307692	0.369565	0.0652174	0.318841	0.411765	0.352941	0.365854	0.354839	0.405405	1	0.33871	0.31746	0.278689	0.203704	0.235294	0.224138	0.5	0.5	0.324324	0.352941	0.0538462	0	0.0816327	0.339623	0.333333	0.311475	0.333333	0.229167	0.224138
LIHC_M150	0.350515	0.372093	0.253012	0.328571	0.442623	0.0724638	0.364706	0.258621	0.325301	0.306452	0.269841	0.327586	0.33871	1	0.35	0.271605	0.264151	0.1875	0.230769	0.333333	0.362069	0.254237	0.282051	0.0738916	0.0263158	0.0985915	0.411765	0.196721	0.329114	0.289855	0.246753	0.2
LIHC_M655	0.222222	0.357143	0.333333	0.270833	0.435897	0.105263	0.2	0.413793	0.625	0.441176	0.296296	0.451613	0.275	1	0.46875	0.346154	0.26087	0.346154	0.333333	0.419355	0.37931	0.235294	0.5	0.0358974	0.0434783	0.0454545	0.361702	0.242424	0.459459	0.357143	0.230769	0.28
LUAD_M1553	0.214286	0.322581	0.296296	0.230769	0.404762	0.097561	0.191781	0.419355	0.5	0.375	0.310345	0.371429	0.317073	0.46875	1	0.266667	0.22	0.266667	0.296296	0.342857	0.30303	0.184211	0.4	0.0409207	0.0263158	0.015748	0.264151	0.257143	0.425	0.276596	0.222222	0.218182
LUAD_M1729	0.1875	0.416667	0.333333	0.212766	0.333333	0.0555556	0.176471	0.37037	0.521739	0.323529	0.409091	0.322581	0.305556	0.37931	1	0.347826	0.227273	0.347826	0.4	0.333333	0.384615	0.225806	0.4	0.0335917	0.0322581	0.0243902	0.22449	0.321429	0.388889	0.232558	0.263158	0.2
LUSC_M959	0.153846	0.45	0.533333	0.209302	0.305556	0.0645161	0.209677	0.391304	0.428571	0.333333	0.368421	0.333333	0.235294	0.346154	0.347826	1	0.225	0.625	0.533333	0.346154	0.409091	0.375	0.428571	0.025974	0	0.0454545	0.304348	0.333333	0.285714	0.297297	0.228571	0.222222
OV_M266	0.125	0.45	0.533333	0.209302	0.27027	0.0645161	0.153846	0.391304	0.428571	0.333333	0.368421	0.333333	0.235294	0.346154	0.347826	0.625	0.225	1	0.533333	0.346154	0.409091	0.375	0.428571	0.0243902	0.0344828	0.0454545	0.277778	0.333333	0.285714	0.263158	0.228571	0.222222
PAAD_M180	0.12987	0.529412	0.538462	0.166667	0.257143	0.0454545	0.125	0.380952	0.5	0.321429	0.4375	0.32	0.21875	0.333333	0.4	0.533333	0.243243	0.533333	1	0.333333	0.473684	0.363636	0.35	0.0208333	0	0.0526316	0.333333	0.318182	0.272727	0.216216	0.212121	0.181818
PCPG_M174	0.253165	0.407407	0.391304	0.355556	0.473684	0.105263	0.272727	0.413793	0.5	0.53125	0.521739	0.5	0.5	0.419355	0.342857	0.346154	0.26087	0.346154	0.333333	1	0.46875	0.5	0.5	0.0493506	0	0.0697674	0.361702	0.366667	0.384615	0.390244	0.333333	0.28
PRAD_M196	0.228916	0.413793	0.296296	0.28	0.404762	0.0465116	0.279412	0.361111	0.354839	0.368421	0.461538	0.454545	0.5	0.362069	0.30303	0.345455	0.270833	0.310345	0.346154	0.46875	1	0.451613	0.290909	0.0544041	0	0.0888889	0.367347	0.333333	0.310345	0.333333	0.375	0.218182
PRAD_M461	0.202532	0.478261	0.4	0.23913	0.368421	0.0346821	0.212121	0.37037	0.458333	0.363636	0.55	0.366667	0.382353	0.37931	0.384615	0.409091	0.285714	0.409091	0.473684	0.428571	1	0.407407	0.346154	0.038961	0	0.05	0.276596	0.321429	0.351351	0.325	0.304348	0.25
READ_M287	0.197531	0.384615	0.304348	0.255319	0.35	0.0810811	0.223881	0.3	0.275862	0.342857	0.375	0.34375	0.324324	0.254237	0.225806	0.375	0.217391	0.375	0.363636	0.5	0.451613	1	0.275862	0.0360825	0	0.0731707	0.363636	0.3	0.245614	0.309524	0.315789	0.192308
SARC_M488	0.175	0.375	0.5	0.302326	0.378378	0.0882353	0.19697	0.44	0.619048	0.419355	0.363636	0.428571	0.352941	0.5	0.4	0.428571	0.232558	0.428571	0.35	0.5	0.346154	0.275862	1	0.0681818	0.03125	0.0384615	0.311111	0.333333	0.4	0.333333	0.205128	0.282609
THCA_M663	0.27957	0.26087	0.260274	0.285714	0.407407	0.0877193	0.283951	0.294118	0.311111	0.352941	0.236364	0.382979	0.339623	0.411765	0.28	0.3	0.232323	0.195652	0.235294	0.361702	0.367347	0.319149	0.333333	0.0626566	0	0.047619	1	0.196078	0.347826	0.327586	0.272727	0.217391
UCEC_M405	0.252874	0.333333	0.272727	0.290909	0.434783	0.0833333	0.27027	0.378378	0.441176	0.404762	0.285714	0.375	0.297872	0.459459	0.425	0.285714	0.230769	0.285714	0.272727	0.384615	0.351351	0.238095	0.4	0.0454545	0	0.0384615	0.345455	0.243902	1	0.34	0.254237	0.275862
UCEC_M81	0.347368	0.419753	0.311688	0.333333	0.440678	0.0757576	0.345238	0.296296	0.307692	0.322034	0.241935	0.321429	0.311475	0.329114	0.3125	0.333333	0.247619	0.185185	0.223684	0.327273	0.315068	0.245614	0.347222	0.0717822	0	0.0714286	0.347826	0.25	1	0.323077	0.273973	0.207792
UCS_M1658	0.244444	0.275	0.268657	0.275862	0.408163	0.0784314	0.25974	0.35	0.333333	0.409091	0.263158	0.414634	0.333333	0.357143	0.276596	0.297297	0.224138	0.263158	0.216216	0.390244	0.333333	0.309524	0.333333	0.0503778	0.0283019	0.0352941	0.327586	0.227273	0.34	1	0.262295	0.262295
BLCA_M495	1	0.5	0.0327869	0.136364	0.0333333	0	0.444444	0.0416667	0	0.0967742	0.102041	0.0625	0.0434783	0.411765	0.6	0.52381	0.08	0.444444	0.4	0.0519481	0.28	0.470588	0.136364	0.121951	0.333333	0.04	0.025641	0.0357143	0.0322581	0.411765	0.0684932	0.0769231
BLCA_M516	1	0.857143	0.025641	0.030303	0.0285714	0.0454545	0.647059	0.08	0.769231	0.217391	0.152174	0.0344828	0.0294118	0.846154	0.333333	0.21875	0.0454545	0.666667	0.227273	0.277778	0.55	0.0588235	0.5	0.0967742	0.222222	0.125	0.0416667	0.0740741	0.0583942	0.705882	0.125	0.0909091
BRCA_M182	0.5	1	0.0322581	0.111111	0	0	0.47619	0.0357143	0.0078125	0.147059	0.113208	0.0540541	0.0357143	0.45	0.45	0.608696	0.0666667	0.555556	0.32	0.0487805	0.233333	0.363636	0.111111	0.108696	0.26087	0.0487805	0	0.030303	0.0421053	0.45	0.0779221	0.102941
BRCA_M252	0.857143	1	0.0344828	0.03125	0	0.0344828	0.647059	0.08	0.769231	0.217391	0.152174	0.0454545	0.0294118	0.846154	0.333333	0.21875	0.0454545	0.785714	0.227273	0.277778	0.55	0.0641026	0.5	0.0967742	0.222222	0.125	0.0416667	0.0740741	0.0583942	0.8125	0.115942	0.0909091
ESCA_M1321	0.444444	0.47619	0.030303	0.15	0	0	1	0.0454545	0.00795756	0.185185	0.130435	0.0666667	0.047619	0.466667	0.571429	0.666667	0.047619	0.521739	0.368421	0.0533333	0.25	0.4375	0.15	0.0731707	0.222222	0.0588235	0	0.0384615	0.0437158	0.833333	0.0704225	0.0967742
ESCA_M1322	0.647059	0.647059	0.0338983	0.037037	0.0465116	0.0416667	1	0.0740741	0.5625	0.25	0.122449	0.0416667	0	0.625	0.416667	0.28125	0.0416667	0.588235	0.26087	0.25	0.434783	0.0714286	0.368421	0.106383	0.179487	0.115385	0.0384615	0.0689655	0.057554	0.722222	0.128571	0.09375
ESCA_M488	0.37931	0.37931	0.0425532	0.0857143	0.0363636	0.0277778	1	0.0512821	0.321429	0.225806	0.218182	0.0681818	0.04	0.357143	0.642857	0.65625	0.0526316	0.675676	0.464286	0.193548	0.551724	0.266667	0.357143	0.0943396	0.15625	0.0789474	0.0392157	0.075	0.0529801	0.433333	0.181818	0.122951
HNSC_M560	0.769231	0.769231	0.0173913	0.0344828	0	0.047619	0.5625	0.0909091	1	0.190476	0.162791	0.0526316	0	0.909091	0.318182	0.241379	0.0526316	0.692308	0.263158	0.333333	0.555556	0.0645161	0.615385	0.0879121	0.242424	0.142857	0.047619	0.0833333	0.0518519	0.666667	0.105263	0.1
LIHC_M329	0.846154	0.846154	0.0172414	0.0333333	0	0.05	0.625	0.0869565	0.909091	0.181818	0.159091	0.05	0.03125	1	0.304348	0.233333	0.0384615	0.769231	0.25	0.3125	0.526316	0.0625	0.571429	0.0869565	0.235294	0.136364	0.0454545	0.08	0.0592593	0.75	0.102941	0.0967742
LIHC_M376	0.411765	0.45	0.0357143	0.166667	0	0	0.466667	0.05	0.030303	0.111111	0.0869565	0.0714286	0.0434783	1	0.428571	0.473684	0.05	0.375	0.333333	0.0405405	0.333333	0.4	0.166667	0.0769231	0.176471	0.0454545	0	0.0416667	0.0526316	0.538462	0.0571429	0.1
LUAD_M1324	0.6	0.45	0.0294118	0.166667	0	0	0.571429	0.05	0	0.111111	0.111111	0.0714286	0.0434783	0.428571	1	0.555556	0.0952381	0.466667	0.5	0.0547945	0.272727	0.4	0.166667	0.135135	0.428571	0.0454545	0	0.0416667	0.04	0.538462	0.0571429	0.0819672
LUAD_M732	0.375	0.333333	0.0243902	0.111111	0.0425532	0.0285714	0.642857	0.0645161	0.318182	0.259259	0.204082	0.0833333	0.03125	0.304348	1	0.607143	0.0666667	0.5	0.65	0.26087	0.608696	0.25	0.428571	0.108696	0.162791	0.1	0.0465116	0.09375	0.0342466	0.346154	0.152778	0.102941
LUSC_M212	0.37931	0.451613	0.0416667	0.0882353	0.0263158	0	0.65625	0.0526316	0.241379	0.171875	0.2	0.0697674	0.0285714	0.333333	0.607143	1	0.0540541	0.648649	0.481481	0.2	0.419355	0.321429	0.321429	0.0943396	0.2	0.0810811	0.04	0.0769231	0.0512821	0.384615	0.168831	0.123288
LUSC_M747	0.52381	0.608696	0.046875	0.115385	0	0	0.666667	0.0357143	0.0243902	0.151515	0.115385	0.0555556	0.037037	0.473684	0.555556	1	0.0689655	0.708333	0.333333	0.0493827	0.2	0.45	0.115385	0.111111	0.272727	0.05	0	0.03125	0.0534759	0.555556	0.0933333	0.104478
OV_M1565	0.444444	0.409091	0.0333333	0.0952381	0	0	0.411765	0.047619	0.047619	0.1	0.106383	0.103448	0.047619	0.375	0.466667	0.428571	0.0869565	1	0.444444	0.1	0.25	0.352941	0.210526	0.1	0.294118	0.0588235	0	0.0384615	0.047619	0.375	0.0555556	0.0967742
OV_M521	0.297297	0.384615	0.0364964	0.0697674	0	0	0.675676	0.0425532	0.285714	0.166667	0.209677	0.0576923	0.0227273	0.314286	0.5	0.648649	0.0454545	1	0.361111	0.153846	0.432432	0.243243	0.314286	0.0925926	0.153846	0.0652174	0.0338983	0.0625	0.0503145	0.342105	0.178571	0.109756
OV_M888	0.423077	0.555556	0.0285714	0.0967742	0	0	0.521739	0.03125	0.03125	0.131579	0.125	0.075	0.03125	0.32	0.434783	0.708333	0.0588235	1	0.321429	0.0645161	0.205882	0.36	0.133333	0.1	0.222222	0.0681818	0	0.027027	0.0520833	0.434783	0.0875	0.112676
OV_M889	0.666667	0.785714	0.0347826	0.0322581	0	0.0434783	0.588235	0.0434783	0.692308	0.173913	0.130435	0.047619	0.030303	0.769231	0.291667	0.1875	0.047619	1	0.181818	0.222222	0.428571	0.0645161	0.4375	0.0860215	0.194444	0.130435	0.0434783	0.0769231	0.0588235	0.75	0.117647	0.09375
PAAD_M498	0.4	0.32	0.00688073	0.136364	0	0	0.464286	0.0769231	0.263158	0.16	0.2	0.0967742	0.0384615	0.333333	0.65	0.481481	0.08	0.444444	1	0.2	0.52381	0.315789	0.388889	0.0952381	0.263158	0.08	0.04	0.0714286	0.0416667	0.411765	0.114286	0.111111
PRAD_M528	0.55	0.55	0.0245902	0.115385	0	0	0.551724	0.0666667	0.555556	0.222222	0.234043	0.0857143	0.0322581	0.526316	0.608696	0.419355	0.056338	0.432432	0.52381	0.272727	1	0.208333	0.611111	0.0918367	0.195122	0.103448	0.047619	0.0967742	0.048951	0.478261	0.138889	0.0882353
READ_M486	0.470588	0.363636	0.0344828	0.157895	0.037037	0	0.4375	0.047619	0.027027	0.148148	0.108696	0.0333333	0.0416667	0.4	0.4	0.45	0.0465116	0.36	0.315789	0.05	0.208333	1	0.157895	0.0588235	0.166667	0.0434783	0	0.0416667	0.05	0.5	0.0714286	0.0806452
READ_M70	0.409091	0.333333	0.0285714	0.12	0.030303	0	0.380952	0.0384615	0.0078534	0.121212	0.117647	0.0571429	0.0333333	0.35	0.35	0.4	0.0425532	0.333333	0.291667	0.05	0.206897	1	0.12	0.0652174	0.173913	0.0344828	0	0.0333333	0.0652174	0.421053	0.08	0.0895522
SARC_M65	0.5	0.5	0.0172414	0.1	0	0.05	0.368421	0.0869565	0.615385	0.130435	0.159091	0.05	0.03125	0.571429	0.428571	0.321429	0.05	0.4375	0.388889	0.3125	0.611111	0.157895	1	0.0638298	0.2	0.136364	0.0571429	0.08	0.0454545	0.421053	0.102941	0.0967742
STAD_M114	0.333333	0.26087	0.027027	0.0454545	0	0.0434783	0.222222	0	0.0434783	0.0869565	0.0869565	0.0714286	0.0434783	0.176471	0.428571	0.272727	0.0952381	0.294118	0.263158	0.0547945	0.12	0.173913	0.05	0.105263	1	0.0384615	0	0	0.0645161	0.25	0.0833333	0.05
UCS_M118	0.705882	0.8125	0.0512821	0.0357143	0.0454545	0.037037	0.722222	0.0714286	0.625	0.24	0.142857	0.04	0.0357143	0.6875	0.346154	0.2	0.04	0.75	0.2	0.238095	0.478261	0.0764331	0.421053	0.105263	0.205128	0.111111	0.037037	0.0666667	0.0714286	1	0.142857	0.0909091
UCS_M297	0.411765	0.45	0.0322581	0.166667	0	0.0107527	0.833333	0.05	0.008	0.2	0.136364	0.0714286	0.047619	0.538462	0.538462	0.555556	0.05	0.434783	0.411765	0.0547945	0.272727	0.5	0.166667	0.0769231	0.25	0.0625	0	0.0416667	0.0441989	1	0.0724638	0.1
UCS_M627	0.642857	0.769231	0.0173913	0.0333333	0	0.047619	0.5625	0.0909091	0.666667	0.190476	0.111111	0.0526316	0	0.75	0.26087	0.2	0.0526316	0.692308	0.2	0.333333	0.4	0.0645161	0.4	0.076087	0.171429	0.142857	0	0.0833333	0.0518519	1	0.105263	0.1
BLCA_M605	1	0.642857	0.428571	0.25	0	0.08	0.45	0.4375	0.526316	0.142857	0.32	0.25	0.375	0.37037	0.4	0.588235	0.294118	0.454545	0.666667	0.25	0.0322581	0.35	0.35	0.294118	0.5	0.08	0.181818	0.0416667	0.533333	0.5625	0.0967742	0.0900901
BRCA_M1279	0.642857	1	0.357143	0.266667	0.0416667	0.08	0.454545	0.444444	0.52381	0.125	0.241379	0.15	0.666667	0.37931	0.47619	0.5	0.342857	0.590909	0.4375	0.217391	0.0361446	0.304348	0.428571	0.25	0.428571	0.0714286	0.208333	0.0357143	0.529412	0.473684	0.0882353	0.117117
BRCA_M703	0.5	1	0.40625	0.285714	0.0322581	0.148936	0.625	0.366667	0.56	0.0967742	0.34375	0.242424	0.454545	0.62069	0.809524	0.761905	0.5	0.909091	0.5	0.296296	0.0449438	0.48	0.681818	0.28	0.761905	0.125	0.2	0.0526316	0.571429	0.666667	0.0731707	0.18018
CESC_M1342	0.428571	0.363636	1	0.166667	0	0.125	0.388889	0.277778	0.318182	0.0594059	0.269231	0.333333	0.157895	0.275862	0.333333	0.35	0.222222	0.333333	0.538462	0.136364	0.05	0.35	0.227273	0.222222	0.421053	0.0833333	0.130435	0.04	0.277778	0.470588	0.0625	0.0707965
CESC_M645	0.346154	0.40625	1	0.219512	0	0.0925926	0.333333	0.243243	0.375	0.114286	0.333333	0.166667	0.233333	0.368421	0.34375	0.354839	0.282609	0.382353	0.296296	0.212121	0.0638298	0.354839	0.235294	0.194444	0.354839	0.0526316	0.171429	0.031746	0.357143	0.37931	0.0652174	0.133333
CESC_M98	0.294118	0.384615	1	0.204082	0	0.133333	0.325	0.213115	0.5	0.116279	0.325581	0.128205	0.233645	0.355556	0.3	0.342105	0.307692	0.365854	0.257143	0.25641	0.0535714	0.307692	0.243902	0.181818	0.342105	0.1	0.162791	0.0384615	0.342857	0.324324	0.0740741	0.141732
ESCA_M237	0.45	0.625	0.333333	0.257143	0.0357143	0.104167	1	0.290323	0.52	0.1	0.354839	0.16	0.291667	0.483871	0.48	0.636364	0.358974	0.64	0.45	0.307692	0.0278884	0.384615	0.384615	0.291667	0.565217	0.0740741	0.166667	0.0535714	0.52381	0.545455	0.0540541	0.130435
ESCA_M897	0.388889	0.458333	0.388889	0.290323	0.0416667	0.0666667	1	0.241379	0.416667	0.0740741	0.225806	0.190476	0.285714	0.354839	0.32	0.454545	0.25641	0.48	0.5625	0.25	0.0416667	0.333333	0.28	0.285714	0.454545	0.0666667	0.148148	0.0576923	0.4	0.5	0.0606061	0.0956522
GBM_M1451	0.4375	0.444444	0.277778	0.151515	0.0416667	0.111111	0.230769	1	0.28	0.0740741	0.241379	0.210526	0.315789	0.212121	0.291667	0.304348	0.236842	0.296296	0.352941	0.166667	0.0434783	0.25	0.25	0.238095	0.304348	0.0714286	0.16	0.04	0.3	0.333333	0.0909091	0.0689655
HNSC_M1275	0.526316	0.56	0.394737	0.294118	0	0.0909091	0.52	0.290323	1	0.1	0.448276	0.26087	0.347826	0.4375	0.423077	0.565217	0.358974	0.518519	0.45	0.36	0.0526316	0.384615	0.384615	0.347826	0.5	0.0909091	0.206897	0.0535714	0.52381	0.478261	0.102564	0.12069
HNSC_M129	0.238095	0.409091	0.381818	0.245283	0.0588235	0.113208	0.326087	0.261538	1	0.130081	0.27451	0.26	0.272727	0.352941	0.333333	0.372093	0.3125	0.391304	0.238095	0.23913	0.0588235	0.282609	0.282609	0.176471	0.372093	0.0943396	0.115385	0.046875	0.27907	0.325581	0.0645161	0.159091
HNSC_M609	0.344828	0.53125	0.5	0.227273	0	0.15	0.454545	0.254545	1	0.0862069	0.368421	0.181818	0.242424	0.435897	0.424242	0.483871	0.4	0.5	0.344828	0.257143	0.0416667	0.393939	0.352941	0.242424	0.483871	0.0714286	0.153846	0.0454545	0.4	0.466667	0.0816327	0.147541
KIRC_M141	0.32	0.34375	0.333333	0.142857	0	0.0961538	0.354839	0.333333	0.448276	0.125	1	0.222222	0.163462	0.282051	0.322581	0.37931	0.295455	0.323529	0.269231	0.266667	0.0666667	0.290323	0.25	0.296296	0.333333	0.1	0.147059	0.05	0.333333	0.310345	0.0930233	0.107438
LGG_M399	0.375	0.666667	0.233333	0.233333	0.0434783	0.0833333	0.291667	0.315789	0.347826	0.1	0.136364	0.1	1	0.258065	0.304348	0.318182	0.243243	0.416667	0.294118	0.227273	0.0571429	0.26087	0.318182	0.153846	0.318182	0.047619	0.217391	0.0322581	0.315789	0.35	0.0909091	0.0884956
LIHC_M1171	0.25	0.391304	0.222222	0.107143	0	0.121951	0.291667	0.178571	0.242424	0.0857143	0.222222	0.222222	0.210526	1	0.428571	0.380952	0.210526	0.36	0.222222	0.173913	0.04	0.26087	0.380952	0.0909091	0.45	0.166667	0.0606061	0.0625	0.25	0.35	0.0666667	0.0884956
LIHC_M507	0.37037	0.62069	0.368421	0.268293	0	0.0892857	0.483871	0.263158	0.4375	0.0806452	0.282051	0.2	0.258065	1	0.5	0.571429	0.355556	0.580645	0.37037	0.272727	0.04	0.375	0.419355	0.21875	0.571429	0.102564	0.162162	0.0806452	0.428571	0.5	0.0689655	0.189655
LUAD_M694	0.4	0.809524	0.34375	0.194444	0.0344828	0.155556	0.48	0.344828	0.424242	0.0769231	0.322581	0.21875	0.304348	0.5	1	0.666667	0.405405	0.73913	0.4	0.222222	0.045977	0.458333	0.590909	0.25	0.666667	0.133333	0.172414	0.0545455	0.47619	0.571429	0.0625	0.151786
LUSC_M148	0.588235	0.761905	0.354839	0.272727	0	0.108696	0.636364	0.357143	0.565217	0.107143	0.37931	0.225806	0.318182	0.571429	0.666667	1	0.378378	0.695652	0.588235	0.333333	0.0344828	0.478261	0.478261	0.318182	0.789474	0.1	0.222222	0.0555556	0.666667	0.684211	0.0789474	0.142857
MESO_M1250	0.294118	0.5	0.307692	0.18	0.0222222	0.133333	0.358974	0.309524	0.4	0.136364	0.295455	0.170213	0.269231	0.355556	0.405405	0.378378	1	0.473684	0.294118	0.195122	0.078125	0.275	0.378378	0.181818	0.378378	0.0851064	0.111111	0.113208	0.305556	0.361111	0.0909091	0.16
OV_M1385	0.454545	0.909091	0.382353	0.27027	0.030303	0.142857	0.64	0.34375	0.518519	0.0917431	0.323529	0.228571	0.416667	0.580645	0.73913	0.695652	0.473684	1	0.454545	0.275862	0.043956	0.444444	0.625	0.259259	0.695652	0.117647	0.1875	0.0689655	0.521739	0.608696	0.0697674	0.176991
PAAD_M476	0.666667	0.5	0.538462	0.296296	0	0.08	0.5625	0.352941	0.45	0.0909091	0.269231	0.25	0.294118	0.37037	0.4	0.588235	0.294118	0.454545	1	0.25	0.0375	0.421053	0.35	0.294118	0.588235	0.08	0.181818	0.0638298	0.533333	0.666667	0.0967742	0.0900901
READ_M476	0.35	0.48	0.354839	0.235294	0	0.0625	0.384615	0.310345	0.393939	0.0754717	0.290323	0.173913	0.26087	0.375	0.458333	0.478261	0.275	0.444444	0.421053	0.28	0.05	1	0.307692	0.26087	0.545455	0.0666667	0.222222	0.0555556	0.428571	0.52381	0.108108	0.113043
SARC_M149	0.35	0.681818	0.243902	0.2	0.0357143	0.148148	0.384615	0.310345	0.384615	0.08	0.25	0.225806	0.318182	0.419355	0.590909	0.478261	0.378378	0.625	0.35	0.230769	0.0357143	0.307692	1	0.166667	0.545455	0.137931	0.1	0.0555556	0.363636	0.454545	0.0645161	0.132743
STAD_M135	0.391304	0.615385	0.333333	0.27027	0	0.0980392	0.464286	0.30303	0.416667	0.0666667	0.285714	0.228571	0.259259	0.484848	0.538462	0.625	0.333333	0.571429	0.454545	0.275862	0.0326087	0.444444	0.444444	0.214286	1	0.117647	0.1875	0.0508475	0.458333	0.608696	0.0697674	0.146552
STAD_M502	0.5	0.761905	0.421053	0.272727	0	0.108696	0.565217	0.357143	0.5	0.075	0.333333	0.266667	0.318182	0.571429	0.666667	0.789474	0.378378	0.695652	0.588235	0.333333	0.0344828	0.545455	0.545455	0.26087	1	0.137931	0.222222	0.0555556	0.578947	0.777778	0.0789474	0.142857
UCEC_M134	0.533333	0.571429	0.357143	0.225806	0	0.0930233	0.52381	0.3	0.52381	0.125	0.333333	0.172414	0.315789	0.428571	0.47619	0.666667	0.305556	0.521739	0.533333	0.333333	0.0361446	0.428571	0.363636	0.315789	0.578947	0.0952381	0.26087	0.0555556	1	0.555556	0.0571429	0.117117
UCS_M824	0.5625	0.666667	0.470588	0.290323	0	0.0888889	0.545455	0.384615	0.478261	0.0740741	0.310345	0.2	0.35	0.5	0.571429	0.684211	0.361111	0.608696	0.666667	0.304348	0.0352941	0.52381	0.454545	0.285714	0.777778	0.107143	0.192308	0.0576923	0.555556	1	0.0833333	0.125
BLCA_M91	1	0.385827	0.434783	0.211864	0.306306	0.0703125	0.423729	0.27027	0.371069	0.0238095	0.141414	0.0470588	0.290909	0.048	0.207746	0.339623	0.269231	0.324742	0.330645	0.282209	0.231481	0.333333	0.344595	0.257143	0.0168067	0.144231	0.283784	0.283019	0.320261	0.300885	0.196581	0.121495
BRCA_M15	0.38255	1	0.441667	0.198413	0.275	0.0733945	0.491525	0.284483	0.386503	0.0534351	0.130841	0.0449438	0.347561	0.0454545	0.244681	0.388889	0.342697	0.448087	0.373016	0.331288	0.27027	0.333333	0.389262	0.310345	0.0155039	0.144144	0.294118	0.263158	0.363636	0.313559	0.195312	0.122807
BRCA_M442	0.352459	1	0.434783	0.222222	0.272727	0.0947368	0.483516	0.333333	0.34058	0.0319149	0.212121	0.0583942	0.328947	0.0537634	0.192308	0.434211	0.277419	0.350746	0.389474	0.298969	0.298701	0.402439	0.31746	0.255034	0.0227273	0.162162	0.319328	0.2875	0.369565	0.390244	0.188889	0.191781
BRCA_M88	0.385827	1	0.489583	0.222222	0.294737	0.0849057	0.489796	0.322222	0.361111	0.0384615	0.181818	0.0540541	0.317241	0.0480769	0.215909	0.428571	0.314465	0.40146	0.415842	0.307692	0.305882	0.384615	0.340909	0.277419	0.020202	0.182927	0.322835	0.325581	0.397959	0.344086	0.191919	0.166667
CESC_M1022	0.434783	0.489583	1	0.325301	0.382716	0.0833333	0.551724	0.35	0.412214	0.0430108	0.212121	0.0583942	0.328947	0.0769231	0.187739	0.493151	0.311258	0.346154	0.419355	0.3125	0.333333	0.4375	0.349593	0.272109	0.0227273	0.178082	0.298507	0.355263	0.369565	0.425	0.215909	0.175676
COAD_M77	0.306306	0.294737	0.382716	0.285714	1	0.115385	0.369048	0.396825	0.259542	0.0547945	0.22449	0.059322	0.327869	0.04	0.146245	0.435484	0.240964	0.276596	0.4	0.277108	0.403509	0.484375	0.350877	0.218978	0	0.137931	0.34	0.296875	0.325	0.323944	0.225352	0.196429
ESCA_M233	0.423729	0.491525	0.551724	0.298851	0.369048	0.0972222	1	0.353659	0.413534	0.0638298	0.202899	0.0571429	0.333333	0.0412371	0.199234	0.555556	0.322368	0.359281	0.467391	0.329897	0.337662	0.475	0.420168	0.30137	0	0.186667	0.300813	0.341772	0.357895	0.376471	0.223404	0.168831
ESCA_M888	0.292308	0.328947	0.383562	0.253968	0.285714	0.146341	1	0.262295	0.26087	0.020202	0.289474	0.0754717	0.320755	0.0212766	0.116	0.413043	0.24	0.238636	0.311688	0.266667	0.301887	0.408163	0.273585	0.271429	0	0.195652	0.272727	0.384615	0.266667	0.257576	0.333333	0.217391
GBM_M78	0.27027	0.333333	0.35	0.323077	0.396825	0.125	0.353659	1	0.229008	0.057971	0.333333	0.0707965	0.45283	0.0394737	0.11284	0.416667	0.253165	0.303371	0.384615	0.307692	0.407407	0.444444	0.327273	0.189781	0.0175439	0.0508475	0.431818	0.274194	0.259259	0.363636	0.222222	0.235294
HNSC_M763	0.371069	0.386503	0.412214	0.189781	0.259542	0.0753425	0.413534	0.229008	1	0.0416667	0.117647	0.0421053	0.308989	0.0613497	0.234694	0.338843	0.274112	0.325359	0.312057	0.258242	0.214286	0.302326	0.319277	0.263158	0.0152672	0.120968	0.242604	0.228346	0.305882	0.246269	0.15942	0.102362
KIRC_M184	0.188679	0.212121	0.212121	0.288889	0.4	0.3	0.289474	0.363636	0.26087	0.0333333	1	0.0941176	0.289474	0	0.0530612	0.375	0.205882	0.222222	0.19403	0.174603	0.380952	0.333333	0.25	0.192982	0	0.030303	0.521739	0.388889	0.213115	0.291667	0.35	0.346154
LGG_M119	0.253731	0.328947	0.328947	0.338983	0.327869	0.140625	0.333333	0.45283	0.25	0.0491803	0.289474	0.0654206	1	0.0576923	0.138776	0.471698	0.226667	0.282353	0.346667	0.319444	0.408163	0.4375	0.32	0.236111	0	0.1	0.4	0.241379	0.266667	0.31746	0.214286	0.272727
LUSC_M1664	0.264706	0.371429	0.371429	0.321429	0.378378	0.135135	0.413043	0.358491	0.261905	0.0517241	0.375	0.0686275	0.444444	0.0465116	0.118367	1	0.242857	0.283951	0.352113	0.25	0.6	0.488372	0.297872	0.235294	0.0196078	0.162791	0.416667	0.288462	0.267606	0.344828	0.264706	0.243902
LUSC_M315	0.318966	0.37931	0.445783	0.289474	0.388889	0.1	0.518519	0.352113	0.330769	0.0759494	0.236364	0.064	0.390625	0.0298507	0.164062	1	0.353659	0.310078	0.428571	0.341176	0.491525	0.419355	0.370968	0.25	0	0.15625	0.339286	0.22973	0.252747	0.342105	0.219512	0.190476
LUSC_M964	0.339623	0.434211	0.493151	0.338462	0.435484	0.152174	0.555556	0.416667	0.338843	0.0882353	0.295455	0.0701754	0.471698	0.0357143	0.166667	1	0.333333	0.329545	0.453333	0.373333	0.571429	0.509804	0.45098	0.251908	0	0.166667	0.422222	0.269841	0.271605	0.4	0.219178	0.230769
OV_M10	0.324742	0.448087	0.341317	0.154286	0.228916	0.0520231	0.359281	0.197605	0.325359	0.0384615	0.0886076	0.0349345	0.265116	0.0547264	0.233129	0.269461	0.300448	1	0.287356	0.282297	0.2	0.254545	0.329897	0.245536	0.0151515	0.10559	0.238806	0.203704	0.324873	0.25	0.159091	0.0848485
OV_M63	0.304878	0.414013	0.330882	0.195489	0.257812	0.0692308	0.352941	0.256	0.3	0.0503597	0.121739	0.0430108	0.244565	0.0368098	0.204698	0.327731	0.3	1	0.321168	0.264045	0.262712	0.28125	0.279762	0.222798	0.0148148	0.106557	0.256098	0.235772	0.286765	0.246377	0.183824	0.114754
PAAD_M79	0.330645	0.415842	0.419355	0.25	0.4	0.0947368	0.467391	0.384615	0.312057	0.0430108	0.19403	0.0661765	0.346667	0.0619469	0.187739	0.453333	0.285714	0.359223	1	0.3125	0.333333	0.455696	0.328	0.230263	0	0.194444	0.308333	0.303797	0.340426	0.325581	0.188889	0.175676
PRAD_M176	0.185185	0.191176	0.242424	0.272727	0.333333	0.173913	0.219512	0.325581	0.2	0.0357143	0.380952	0.0444444	0.351351	0.025	0.0571429	0.363636	0.2	0.259259	0.208955	0.209677	1	0.324324	0.314286	0.173913	0	0	0.565217	0.3	0.209677	0.26	0.35	0.241379
PRAD_M31	0.238806	0.305882	0.333333	0.344828	0.403509	0.15	0.337662	0.407407	0.225	0.0833333	0.371429	0.0761905	0.408163	0.0526316	0.116466	0.6	0.3	0.301205	0.333333	0.305556	1	0.416667	0.382979	0.25	0	0.08	0.486486	0.285714	0.27027	0.322581	0.236842	0.25
READ_M282	0.333333	0.402439	0.4375	0.328571	0.484375	0.109091	0.475	0.444444	0.302326	0.038961	0.26	0.0666667	0.423729	0.03	0.158103	0.483871	0.239726	0.336957	0.455696	0.313253	0.383333	1	0.355932	0.25	0	0.210526	0.346154	0.387097	0.345679	0.447761	0.232877	0.206897
READ_M980	0.33871	0.333333	0.408451	0.368421	0.403509	0.15	0.410959	0.407407	0.233871	0.031746	0.333333	0.0761905	0.4375	0.0352941	0.120968	0.509804	0.263889	0.301205	0.369863	0.287671	0.416667	1	0.354167	0.239437	0	0.125	0.410256	0.339623	0.305556	0.413793	0.236842	0.222222
SARC_M1093	0.282051	0.24359	0.310811	0.318182	0.350877	0.138889	0.315789	0.327273	0.209677	0.0508475	0.25	0.0677966	0.32	0.0327869	0.11336	0.45098	0.257143	0.22093	0.293333	0.263889	0.382979	0.355932	1	0.268293	0	0.108696	0.405405	0.235294	0.263889	0.338983	0.222222	0.130435
SARC_M376	0.344595	0.389262	0.349593	0.2	0.269565	0.0697674	0.420168	0.234783	0.319277	0.0234375	0.14	0.0467836	0.281437	0.047619	0.190311	0.33913	0.281768	0.329897	0.328	0.296296	0.229358	0.295652	1	0.277457	0.0314961	0.121495	0.256579	0.245455	0.28481	0.275862	0.184874	0.12037
THCA_M1111	0.156863	0.151515	0.173913	0.148936	0.291667	0.157895	0.184211	0.238095	0.190476	0.0434783	0.5	0.0470588	0.184211	0	0.0367347	0.25	0.233333	0.208333	0.134328	0.129032	0.388889	0.189189	0.138889	0.142857	0	0	1	0.3125	0.147541	0.183673	0.352941	0.24
THCA_M664	0.22807	0.26087	0.298507	0.354167	0.4	0.222222	0.285714	0.431818	0.222222	0.0277778	0.521739	0.0638298	0.4	0	0.0772358	0.422222	0.263158	0.290323	0.279412	0.227273	0.565217	0.410256	0.405405	0.222222	0	0	1	0.391304	0.246154	0.326923	0.307692	0.3125
UCS_M1178	0.300885	0.390244	0.425	0.277778	0.323944	0.111111	0.376471	0.363636	0.246269	0.0394737	0.291667	0.0672269	0.31746	0.0526316	0.140625	0.4	0.22449	0.257732	0.325581	0.333333	0.322581	0.447761	0.338983	0.207143	0.0285714	0.133333	0.326923	0.287879	0.301205	1	0.205128	0.210526
BRCA_M218	0.113208	1	0.474576	0.20339	0.4	0.0923077	0.483333	0.140625	0.525424	0.129412	0.0338983	0.0714286	0.0697674	0.529412	0.254545	0.326923	0.285714	0.57971	0.179487	0.0537634	0.0666667	0.268293	0.22449	0.370968	0.436364	0.0392157	0.019802	0.0379747	0.0545455	0.333333	0.0769231	0.1625
BRCA_M767	0.128205	1	0.384615	0.191489	0.266667	0.0980392	0.396226	0.115385	0.454545	0.157143	0.0454545	0.0952381	0.0694444	0.5	0.257143	0.294118	0.236842	0.446154	0.222222	0.0641026	0.0833333	0.219512	0.216216	0.4	0.361702	0.045977	0.0232558	0.046875	0.06	0.26087	0.0543478	0.2
BRCA_M768	0.04	1	0.275862	0.0857143	0.294118	0.0769231	0.176471	0.0810811	0.444444	0.142857	0.0416667	0.135135	0.030303	0.193548	0.285714	0.241379	0.181818	0.290323	0.0357143	0.0289855	0.047619	0.222222	0.285714	0.0677966	0.179487	0.0454545	0.0384615	0.0246914	0.0869565	0.368421	0.0731707	0.107143
CESC_M604	0.0232558	0.372549	1	0.25	0.457143	0.125	0.369565	0.0681818	0.375	0.0930233	0.0322581	0.0888889	0.0625	0.444444	0.34375	0.387097	0.4375	0.516129	0.0645161	0.0555556	0.0434783	0.275	0.36	0.18	0.394737	0.0392157	0.0294118	0.0566038	0.185185	0.288889	0.102564	0.12069
CESC_M83	0.190476	0.474576	1	0.24	0.36	0.12766	0.6	0.142857	0.588235	0.141304	0.04	0.102041	0.0641026	0.4375	0.22449	0.25	0.285714	0.470588	0.169014	0.0408163	0.114286	0.233766	0.214286	0.333333	0.521739	0.0319149	0.0224719	0.0428571	0.113636	0.388889	0.107527	0.183099
COAD_M260	0.0810811	0.4	0.457143	0.238095	1	0.106383	0.372549	0.08	0.365385	0.102041	0.0125	0.0566038	0.06	0.342105	0.388889	0.388889	0.432432	0.459459	0.0735294	0.0394737	0.038961	0.287879	0.322581	0.245283	0.428571	0.0481928	0.0243902	0.0327869	0.0472973	0.354167	0.0813953	0.121212
ESCA_M1240	0.0416667	0.162162	0.333333	0.178571	0.259259	0.142857	1	0.09375	0.25	0.0606061	0.0526316	0.0416667	0.1	0.28	0.615385	0.4	0.263158	0.346154	0.12	0.0833333	0.0178571	0.227273	0.466667	0.0930233	0.171429	0.0461538	0.018018	0.0454545	0.0666667	0.222222	0.0571429	0.0784314
ESCA_M1241	0.2	0.351852	0.454545	0.170732	0.255814	0.0540541	1	0.136364	0.425532	0.106061	0.0408163	0.117647	0.08	0.341463	0.230769	0.257143	0.25641	0.323077	0.133333	0.0571429	0.0847458	0.2	0.275862	0.319149	0.473684	0.037037	0.0234375	0.0535714	0.129032	0.326087	0.0588235	0.129032
ESCA_M443	0.209302	0.483333	0.6	0.230769	0.372549	0.122449	1	0.178571	0.627451	0.1375	0.0384615	0.102041	0.0759494	0.44898	0.291667	0.291667	0.326531	0.43662	0.180556	0.0392157	0.0958904	0.25974	0.232558	0.368421	0.531915	0.0421053	0.021978	0.0416667	0.0851064	0.45283	0.105263	0.194444
HNSC_M1334	0.0925926	0.45	0.28	0.2	0.225	0.0833333	0.32	0.0869565	1	0.109756	0.0285714	0.0555556	0.0652174	0.375	0.16129	0.285714	0.21875	0.306122	0.210526	0.056338	0.0754717	0.2	0.15625	0.291667	0.302326	0.0506329	0.025641	0.0535714	0.0681818	0.321429	0.0348837	0.147541
HNSC_M167	0.204545	0.525424	0.588235	0.226415	0.365385	0.12	0.627451	0.196429	1	0.136842	0.0377358	0.0961538	0.0886076	0.44	0.26	0.285714	0.294118	0.514706	0.246377	0.0574713	0.0945946	0.240506	0.2	0.362069	0.553191	0.0416667	0.0217391	0.0410959	0.0847458	0.444444	0.0927835	0.191781
HNSC_M701	0.235294	0.454545	0.4	0.173913	0.217391	0.097561	0.411765	0.12	1	0.128571	0.0285714	0.0952381	0.0576923	0.326087	0.2	0.282051	0.184211	0.352941	0.271186	0.0519481	0.111111	0.170732	0.131579	0.333333	0.377778	0.0470588	0.025	0.0483871	0.104167	0.333333	0.0555556	0.1875
HNSC_M702	0.047619	0.444444	0.375	0.133333	0.333333	0.0909091	0.268293	0.16129	1	0.16129	0.0909091	0.0857143	0.0576923	0.269231	0.333333	0.28	0.25	0.333333	0.0357143	0.0454545	0.0508475	0.25	0.4375	0.0909091	0.272727	0.05	0.04	0.025974	0.105263	0.466667	0.0810811	0.08
LIHC_M104	0.0491803	0.529412	0.444444	0.232558	0.317073	0.0816327	0.44898	0.170213	0.44	0.103448	0.0487805	0.0487805	0.0882353	1	0.243902	0.289474	0.317073	0.4375	0.138462	0.0526316	0.0566038	0.246377	0.354839	0.34	0.386364	0.0352941	0.0204082	0.0491803	0.142857	0.294118	0.0930233	0.136364
LIHC_M540	0.0294118	0.428571	0.333333	0.25	0.352941	0.097561	0.340426	0.146341	0.391304	0.0930233	0.0606061	0.0425532	0.1	1	0.32	0.264706	0.333333	0.355556	0.142857	0.0588235	0.0588235	0.258065	0.259259	0.311111	0.325	0.03125	0	0.0294118	0.0666667	0.318182	0.0886076	0.155172
LUAD_M1262	0.00616016	0.204082	0.32	0.214286	0.346154	0.136364	0.615385	0.0909091	0.294118	0.0588235	0.05	0.0555556	0.0952381	0.32	1	0.571429	0.315789	0.44	0.115385	0.08	0.0333333	0.217391	0.4375	0.0909091	0.235294	0.0454545	0.0178571	0.0434783	0.105263	0.210526	0.0869565	0.0769231
LUAD_M695	0.0434783	0.285714	0.34375	0.189189	0.388889	0.129032	0.47619	0.0952381	0.333333	0.0697674	0.0333333	0.0434783	0.0655738	0.30303	1	0.4	0.285714	0.4375	0.0833333	0.0571429	0.0434783	0.222222	0.434783	0.0943396	0.238095	0.04	0.0163934	0.030303	0.0487805	0.212766	0.0759494	0.0666667
LUSC_M157	0.015444	0.326923	0.387097	0.189189	0.388889	0.129032	0.347826	0.0784314	0.285714	0.0757576	0.0322581	0.030303	0.0645161	0.264706	0.4	1	0.363636	0.483871	0.0655738	0.0571429	0.0322581	0.241935	0.375	0.183673	0.333333	0.04	0.0322581	0.0377358	0.0689655	0.266667	0.0759494	0.0847458
LUSC_M603	0	0.25	0.315789	0.133333	0.25	0.136364	0.4	0.0588235	0.222222	0.0454545	0.047619	0.0434783	0.0952381	0.222222	0.571429	1	0.206897	0.285714	0.0740741	0.08	0.047619	0.217391	0.4375	0.0909091	0.166667	0.0298507	0.0134228	0.025974	0.05	0.15	0.0714286	0.0769231
MESO_M629	0.030303	0.285714	0.4375	0.236842	0.432432	0.119048	0.326531	0.0740741	0.294118	0.104478	0.030303	0.0625	0.0816327	0.317073	0.296296	0.363636	1	0.4	0.0625	0.0526316	0.0638298	0.25	0.285714	0.22	0.447368	0.0512821	0.030303	0.0357143	0.133333	0.333333	0.1	0.116667
OV_M1079	0.0350877	0.431373	0.516129	0.263158	0.459459	0.114286	0.404255	0.111111	0.395833	0.0869565	0.0294118	0.0833333	0.0615385	0.341463	0.44	0.483871	0.4	1	0.112903	0.0512821	0.0410959	0.265625	0.321429	0.169811	0.365854	0.0506329	0.0333333	0.0535714	0.09375	0.326087	0.0853659	0.114754
OV_M341	0.107692	0.57971	0.470588	0.183099	0.363636	0.0909091	0.43662	0.146667	0.514706	0.133929	0.0422535	0.0704225	0.0714286	0.378788	0.205882	0.25	0.231884	1	0.193182	0.0471698	0.0752688	0.244681	0.15873	0.324324	0.415385	0.0347826	0.0315789	0.0326087	0.0685714	0.328767	0.0683761	0.139785
OV_M586	0.057971	0.553571	0.418605	0.24	0.416667	0.0816327	0.403509	0.163636	0.472727	0.0875	0.0612245	0.0819672	0.0779221	0.4375	0.304348	0.333333	0.285714	1	0.136986	0.0470588	0.0597015	0.25	0.214286	0.245902	0.346154	0.0430108	0.027027	0.0428571	0.0652174	0.315789	0.0729167	0.0933333
SARC_M161	0.0384615	0.285714	0.36	0.129032	0.322581	0.130435	0.466667	0.0882353	0.4375	0.0882353	0.047619	0.0540541	0.0566038	0.259259	0.4375	0.4375	0.3	0.321429	0.0714286	0.04	0.05	0.172414	1	0.0888889	0.228571	0.0294118	0	0.03125	0.1	0.210526	0.0789474	0.0754717
STAD_M142	0.135135	0.436364	0.521739	0.2	0.428571	0.125	0.531915	0.12	0.553191	0.141176	0.0285714	0.0952381	0.0714286	0.386364	0.238095	0.333333	0.447368	0.415385	0.163265	0.0384615	0.09375	0.242857	0.228571	0.307692	1	0.0597015	0.0238095	0.031746	0.108108	0.395833	0.104651	0.169231
UCS_M355	0.175	0.333333	0.388889	0.229167	0.354167	0.136364	0.45283	0.109091	0.444444	0.131579	0.0425532	0.0677966	0.0526316	0.318182	0.212766	0.266667	0.333333	0.328767	0.126761	0.0638298	0.0714286	0.210526	0.170732	0.327273	0.395833	0.032967	0.0223881	0.0309278	0.0697674	1	0.0989011	0.191176
UCS_M976	0.047619	0.368421	0.269231	0.0625	0.25	0.0909091	0.241379	0.0588235	0.466667	0.15	0.05	0.0857143	0	0.178571	0.185185	0.185185	0.25	0.241379	0.016	0.0230769	0.047619	0.212121	0.210526	0.0909091	0.235294	0.05	0.05	0.025974	0.166667	1	0.0810811	0.102041
ACC_M567	0.541667	0.0212766	0.0181818	0.371429	0	0.625	0.666667	0.04	0.538462	0.764706	0.478261	0.55	0.684211	0.526316	0.6	0.5	0.6	0.2	0.684211	0.611111	0.04	0.0416667	0.684211	0.545455	0.733333	0.764706	0.666667	0.0699301	0.0357143	0.0384615	0.6875	1
BLCA_M206	1	0.0294118	0	0.410256	0.025	0.434783	0.615385	0.03125	0.62069	0.681818	0.708333	0.652174	0.772727	0.565217	0.772727	0.689655	0.625	0.195122	0.695652	0.636364	0.0327103	0.0204082	0.772727	0.576923	0.5	0.681818	0.681818	0.0738255	0	0	0.576923	0.541667
BLCA_M808	1	0	0	0.189189	0	0.222222	0.347826	0.025641	0.285714	0.368421	0.428571	0.421053	0.555556	0.25	0.4	0.357143	0.4	0.12	0.473684	0.470588	0.0232558	0	0.473684	0.363636	0.375	0.444444	0.368421	0.047619	0	0	0.304348	0.3
CHOL_M124	0.410256	0.047619	0.025641	1	0.0465116	0.294118	0.358974	0.0363636	0.380952	0.454545	0.368421	0.361111	0.388889	0.382353	0.428571	0.363636	0.388889	0.132075	0.388889	0.342857	0.0311111	0.0487805	0.428571	0.368421	0.333333	0.411765	0.454545	0.0621118	0.0465116	0.0444444	0.405405	0.371429
DLBC_M542	0.434783	0	0	0.294118	0	1	0.47619	0	0.384615	0.625	0.363636	0.421053	0.555556	0.388889	0.473684	0.357143	0.473684	0.151515	0.555556	0.470588	0.0344828	0.047619	0.555556	0.428571	0.571429	0.625	0.529412	0.0693069	0	0	0.642857	0.625
ESCA_M541	0.333333	0.00806452	0	0.194444	0.0112994	0.4	1	0	0.5	0.388889	0.26087	0.3	0.35	0.333333	0.35	0.37037	0.421053	0.137931	0.35	0.333333	0.0333333	0.0526316	0.35	0.26087	0.3125	0.388889	0.315789	0.0496454	0.0526316	0.0344828	0.466667	0.470588
ESCA_M94	0.615385	0	0	0.358974	0	0.47619	1	0.0333333	0.730769	0.666667	0.5	0.565217	0.608696	0.545455	0.608696	0.678571	0.681818	0.205128	0.681818	0.545455	0.0330189	0.0344828	0.681818	0.625	0.55	0.75	0.590909	0.0748299	0.0344828	0	0.56	0.666667
HNSC_M227	0.434783	0.0434783	0.0333333	0.257143	0.0344828	0.375	0.5	0.05	1	0.444444	0.428571	0.421053	0.333333	0.5625	0.473684	0.357143	0.333333	0.151515	0.333333	0.388889	0.0344828	0	0.4	0.363636	0.294118	0.368421	0.529412	0.05	0	0	0.4375	0.368421
HNSC_M27	0.62069	0.027027	0	0.380952	0.0392157	0.384615	0.730769	0.0444444	1	0.6	0.517241	0.518519	0.5	0.56	0.615385	0.857143	0.615385	0.155556	0.555556	0.444444	0.0322581	0.09375	0.615385	0.517241	0.44	0.6	0.6	0.0723684	0.0263158	0.0277778	0.517241	0.538462
KICH_M19	0.681818	0.037037	0	0.454545	0.030303	0.625	0.666667	0.0416667	0.6	1	0.619048	0.722222	0.777778	0.705882	0.777778	0.555556	0.777778	0.2	0.777778	0.705882	0.0338164	0	0.882353	0.7	0.733333	0.875	0.875	0.0699301	0	0	0.8	0.764706
KIRC_M17	0.708333	0.0322581	0	0.368421	0	0.363636	0.5	0.0344828	0.517241	0.619048	1	0.666667	0.636364	0.65	0.714286	0.533333	0.565217	0.15	0.636364	0.736842	0.0331754	0	0.714286	0.583333	0.428571	0.619048	0.7	0.0642202	0	0	0.52	0.478261
KIRP_M432	0.652174	0	0.0285714	0.361111	0.0357143	0.421053	0.565217	0.04	0.518519	0.722222	0.666667	1	0.65	0.666667	0.833333	0.535714	0.65	0.194444	0.65	0.666667	0.0336538	0	0.736842	0.590909	0.5	0.722222	0.722222	0.0660377	0	0	0.590909	0.55
LGG_M88	0.772727	0	0	0.388889	0	0.555556	0.608696	0.037037	0.5	0.777778	0.636364	0.65	1	0.55	0.7	0.571429	0.619048	0.222222	0.789474	0.823529	0.0334928	0	0.789474	0.636364	0.647059	0.777778	0.684211	0.0689655	0	0	0.636364	0.684211
LIHC_M70	0.565217	0	0	0.382353	0	0.388889	0.545455	0.0416667	0.5625	0.705882	0.65	0.666667	0.55	1	0.722222	0.518519	0.55	0.171429	0.55	0.647059	0.0289855	0	0.631579	0.65	0.470588	0.611111	0.8125	0.0571429	0	0	0.571429	0.526316
LUAD_M680	0.772727	0.0344828	0	0.428571	0.0285714	0.473684	0.608696	0.037037	0.615385	0.777778	0.714286	0.833333	0.7	0.722222	1	0.62963	0.7	0.189189	0.7	0.631579	0.0334928	0	0.789474	0.565217	0.555556	0.777778	0.777778	0.0654206	0	0	0.636364	0.6
LUSC_M133	0.689655	0.025641	0.0444444	0.363636	0.0377358	0.357143	0.678571	0.0425532	0.857143	0.555556	0.533333	0.535714	0.571429	0.518519	0.62963	1	0.571429	0.173913	0.517241	0.464286	0.0319635	0.0294118	0.62963	0.533333	0.407407	0.555556	0.555556	0.0714286	0.0277778	0.0263158	0.483871	0.5
MESO_M22	0.625	0.0344828	0	0.388889	0	0.473684	0.681818	0.0384615	0.615385	0.777778	0.565217	0.65	0.619048	0.55	0.7	0.571429	1	0.176471	0.7	0.55	0.0285714	0.0215054	0.789474	0.565217	0.555556	0.777778	0.684211	0.0689655	0	0	0.705882	0.6
PAAD_M442	0.695652	0	0	0.388889	0	0.555556	0.681818	0.037037	0.555556	0.777778	0.636364	0.65	0.789474	0.55	0.7	0.517241	0.7	0.189189	1	0.722222	0.0334928	0	0.789474	0.565217	0.647059	0.882353	0.684211	0.0689655	0	0	0.636364	0.684211
PCPG_M140	0.636364	0	0	0.342857	0	0.470588	0.545455	0.0416667	0.444444	0.705882	0.736842	0.666667	0.823529	0.647059	0.631579	0.464286	0.55	0.171429	0.722222	1	0.0339806	0	0.722222	0.65	0.5625	0.705882	0.705882	0.0673077	0	0	0.571429	0.611111
SARC_M308	0.772727	0.0344828	0	0.428571	0	0.555556	0.681818	0.037037	0.615385	0.882353	0.714286	0.736842	0.789474	0.631579	0.789474	0.62963	0.789474	0.189189	0.789474	0.722222	0.0334928	0	1	0.714286	0.647059	0.882353	0.777778	0.0689655	0	0	0.714286	0.684211
SKCM_M72	0.576923	0	0	0.368421	0	0.428571	0.625	0.0344828	0.517241	0.7	0.583333	0.590909	0.636364	0.65	0.565217	0.533333	0.565217	0.210526	0.565217	0.65	0.0331754	0	0.714286	1	0.5	0.619048	0.7	0.0680272	0	0	0.583333	0.545455
STAD_M199	0.5	0	0	0.333333	0	0.571429	0.55	0.047619	0.44	0.733333	0.428571	0.5	0.647059	0.470588	0.555556	0.407407	0.555556	0.151515	0.647059	0.5625	0.0243902	0	0.647059	0.5	1	0.733333	0.625	0.0567376	0	0	0.642857	0.733333
TGCT_M186	0.681818	0.037037	0	0.411765	0	0.625	0.75	0.04	0.6	0.875	0.619048	0.722222	0.777778	0.611111	0.777778	0.555556	0.777778	0.2	0.882353	0.705882	0.0338164	0	0.882353	0.619048	0.733333	1	0.764706	0.0699301	0	0	0.7	0.764706
THCA_M56	0.681818	0	0.0294118	0.454545	0	0.529412	0.590909	0.04	0.6	0.875	0.7	0.722222	0.684211	0.8125	0.777778	0.555556	0.684211	0.2	0.684211	0.705882	0.0338164	0	0.777778	0.7	0.625	0.764706	1	0.0699301	0	0	0.7	0.666667
UVM_M442	0.545455	0.0175439	0	0.363636	0	0.642857	0.52381	0	0.48	0.8	0.47619	0.555556	0.611111	0.529412	0.611111	0.444444	0.705882	0.206897	0.611111	0.529412	0.0292683	0	0.705882	0.55	0.642857	0.6875	0.6875	0.0714286	0	0	1	0.6875
UVM_M92	0.576923	0.015625	0	0.405405	0	0.5	0.56	0.0232558	0.517241	0.789474	0.52	0.590909	0.636364	0.571429	0.636364	0.483871	0.636364	0.179487	0.636364	0.571429	0.0331754	0.0319149	0.714286	0.583333	0.578947	0.7	0.7	0.0753425	0.0363636	0	1	0.619048
BLCA_M312	1	0.0192308	0.642857	0.0434783	0	0.015873	0.08	0.0454545	0.047619	0.227273	0.0322581	0.0384615	0.454545	0.037037	0.318182	0.130435	0.0434783	0.1	0.421053	0.384615	0.22	0.375	0.0588235	0.333333	0.0520833	0.0175439	0.352941	0.04	0.0769231	0.0769231	0.0666667	0.0952381
CESC_M563	0.642857	0	1	0.0416667	0	0.021164	0.12	0.0652174	0.0454545	0.28	0.03125	0.037037	0.434783	0.05	0.304348	0.173913	0.0416667	0.115385	0.4	0.37037	0.215686	0.533333	0.0571429	0.380952	0.0625	0.0384615	0.5	0.0384615	0.0961538	0.0740741	0.1	0.142857
CESC_M564	0.305556	0.108108	1	0.0722892	0.205882	0.05	0.0465116	0.0740741	0.0833333	0.285714	0.0701754	0.111111	0.338983	0.107143	0.409091	0.162791	0.0526316	0.1	0.214286	0.294118	0.452381	0.0597015	0.045977	0.27027	0.0521739	0.0434783	0.296296	0.0304878	0.0808081	0.0697674	0.057971	0.037037
CESC_M70	0.255814	0.0930233	1	0.0631579	0.152174	0.0416667	0.0727273	0.0606061	0.0714286	0.441558	0.0669291	0.107692	0.491803	0.104478	0.485294	0.127273	0.0434783	0.171053	0.235294	0.5	0.55	0.2	0.0430108	0.383333	0.0991736	0.0344828	0.438596	0.0438596	0.0720721	0.0545455	0.0493827	0.0576923
KICH_M319	0.217391	0.0818182	0.441558	0.0677966	0.114286	0.0394737	0.0512821	0.0555556	0.0559441	1	0.0724638	0.114943	0.487179	0.076087	0.536585	0.144737	0.042735	0.175258	0.217391	0.430556	0.594595	0.161765	0.0375	0.402597	0.112676	0.0285714	0.486111	0.0285714	0.0629921	0.0375	0.047619	0.0540541
KICH_M50	0.176471	0.0714286	0.365591	0.0597015	0.0826446	0.0326087	0.0425532	0.0471698	0.0503145	1	0.0684932	0.0970874	0.404255	0.0648148	0.44898	0.119565	0.037594	0.150442	0.176471	0.352273	0.488889	0.130952	0.03125	0.333333	0.101266	0.0247934	0.397727	0.025641	0.0559441	0.03125	0.0413223	0.0322581
KICH_M948	0.227273	0.0444444	0.34375	0.037037	0.0465116	0.0228311	0.0535714	0.038961	0.0588235	1	0.0383142	0.0588235	0.421875	0.0724638	0.422535	0.127273	0.0181818	0.126582	0.311111	0.5	0.47619	0.227273	0.030303	0.33871	0.0901639	0.0375	0.490909	0.0347826	0.0784314	0.0344828	0.0491803	0.0576923
LGG_M396	0.454545	0.0285714	0.434783	0.030303	0.0689655	0.0253807	0.0882353	0.0545455	0.0322581	0.391304	0.0204918	0.0416667	1	0.0833333	0.5	0.142857	0.0263158	0.135593	0.48	0.483871	0.339623	0.391304	0.0697674	0.52	0.0673077	0.0243902	0.444444	0.0322581	0.0864198	0.0555556	0.0769231	0.1
LGG_M70	0.306122	0.11236	0.491803	0.049505	0.183673	0.0344828	0.0666667	0.056338	0.0737705	0.487179	0.07393	0.115942	1	0.112676	0.558824	0.175439	0.0515464	0.220779	0.306122	0.596154	0.580645	0.204082	0.0440252	0.466667	0.121951	0.0273973	0.581818	0.0333333	0.0689655	0.05	0.0465116	0.0526316
LUAD_M285	0.318182	0.0322581	0.304348	0.027027	0	0.037037	0.0967742	0.0588235	0.05	0.297872	0.0285714	0.0638298	0.5	0.0454545	1	0.137931	0.0333333	0.0847458	0.307692	0.34375	0.236364	0.318182	0.0487805	0.458333	0.0485437	0.0322581	0.5	0.0357143	0.0862069	0.0606061	0.0833333	0.111111
LUAD_M286	0.382353	0.108108	0.409091	0.0470588	0.171429	0.05	0.0714286	0.0545455	0.0857143	0.337838	0.0746888	0.153846	0.385965	0.107143	1	0.219512	0.0625	0.166667	0.214286	0.434783	0.525	0.0769231	0.0454545	0.46875	0.08	0.0512821	0.372549	0.04	0.0808081	0.0697674	0.0735294	0.0512821
LUAD_M70	0.233333	0.09	0.485294	0.0357143	0.114754	0.0344828	0.0588235	0.0365854	0.0681818	0.536585	0.071161	0.115385	0.558824	0.0987654	1	0.149254	0.046729	0.209302	0.275862	0.55	0.588235	0.189655	0.0381679	0.441176	0.104478	0.030303	0.515625	0.0307692	0.0683761	0.0428571	0.0526316	0.0447761
LUAD_M8	0.177215	0.0756303	0.37931	0.0305344	0.0875	0.030303	0.045977	0.029703	0.0655738	0.464646	0.0664336	0.0927835	0.436782	0.08	1	0.116279	0.0396825	0.171429	0.207792	0.417722	0.45977	0.142857	0.0337079	0.376471	0.0915033	0.0235294	0.39759	0.027907	0.0588235	0.0378788	0.0438596	0.0481928
PAAD_M54	0.421053	0.0555556	0.4	0.0344828	0	0.0260417	0.0714286	0.06	0.0384615	0.311111	0.0264901	0.0465116	0.48	0.05	0.307692	0.148148	0.0357143	0.127273	1	0.576923	0.269231	0.35	0.0512821	0.269231	0.0707071	0.0254237	0.36	0.0571429	0.0714286	0.0645161	0.0882353	0.12
PCPG_M374	0.384615	0.0444444	0.37037	0	0.0294118	0.0294118	0.0789474	0.0508475	0.0425532	0.416667	0.0314465	0.0588235	0.483871	0.0566038	0.383333	0.111111	0.027027	0.163934	0.576923	1	0.388889	0.384615	0.0416667	0.448276	0.0952381	0.0285714	0.482759	0.0454545	0.0833333	0.05	0.0697674	0.0882353
PCPG_M80	0.307692	0.0886076	0.5	0.0222222	0.153846	0.0285714	0.0652174	0.0434783	0.0630631	0.5	0.0562249	0.142857	0.596154	0.137931	0.55	0.173913	0.0229885	0.208955	0.416667	1	0.574074	0.314286	0.0344828	0.5	0.106195	0.025	0.608696	0.0373832	0.0736842	0.0638298	0.0566038	0.0681818
PRAD_M276	0.269231	0.0978261	0.55	0.0485437	0.153846	0.0379747	0.0491803	0.0405405	0.0813008	0.594595	0.0733591	0.128571	0.580645	0.109589	0.588235	0.169492	0.0505051	0.185185	0.269231	0.574074	1	0.196078	0.046875	0.428571	0.09375	0.0344828	0.618182	0.0413223	0.0677966	0.0634921	0.0574713	0.0333333
PRAD_M664	0.352941	0.109589	0.452381	0.060241	0.212121	0.0508475	0.0731707	0.0555556	0.1	0.361111	0.0705394	0.156863	0.392857	0.12963	0.525	0.225	0.0632911	0.151515	0.25	0.354167	1	0.0769231	0.0523256	0.4375	0.0666667	0.0526316	0.416667	0.0408163	0.0816327	0.0714286	0.0746269	0.0357143
READ_M193	0.375	0.0571429	0.533333	0.05	0	0.0434783	0.125	0.0666667	0.047619	0.227273	0	0.0384615	0.391304	0.0508475	0.318182	0.130435	0.0416667	0.14	0.35	0.384615	0.196078	1	0.0588235	0.272727	0.0744681	0.0265487	0.533333	0.04	0.0980392	0.0769231	0.103448	0.15
SKCM_M18	0.244444	0.0819672	0.383333	0.0638298	0.136364	0.0625	0.0588235	0.0405405	0.0512821	0.402597	0.046875	0.15	0.466667	0.126984	0.441176	0.18	0.0561798	0.178082	0.22449	0.5	0.428571	0.159091	0.0576923	1	0.101695	0.0363636	0.436364	0.0357143	0.0727273	0.0377358	0.0517241	0.0869565
SKCM_M227	0.333333	0	0.380952	0.037037	0	0.0384615	0.0645161	0.0606061	0.0512821	0.276596	0	0.0652174	0.52	0.0666667	0.458333	0.142857	0.0344828	0.0862069	0.269231	0.448276	0.240741	0.272727	0.028169	1	0.07	0.0322581	0.458333	0.0449438	0.0877193	0.0625	0.0857143	0.115385
SKCM_M229	0.333333	0.106383	0.304348	0.04	0.0862069	0.0352941	0.0714286	0.0487805	0.0677966	0.217391	0.042735	0.216216	0.254902	0.119048	0.46875	0.25	0.0769231	0.148148	0.241379	0.368421	0.4375	0.0454545	0.0689655	1	0.049505	0.0487805	0.423077	0.04	0.0606061	0.0689655	0.0740741	0.0833333
THCA_M1015	0.352941	0.0555556	0.5	0.0454545	0	0.021164	0.12	0.0652174	0.0227273	0.25	0	0.0307692	0.375	0.05	0.363636	0.125	0	0.115385	0.272727	0.37037	0.215686	0.533333	0.0384615	0.380952	0.0736842	0.0263158	1	0.0243902	0.0961538	0.0740741	0.1	0.142857
THCA_M117	0.25	0.0714286	0.438596	0.0319149	0.102564	0.0232558	0.0816327	0.0410959	0.042735	0.490909	0.0511811	0.152542	0.581818	0.111111	0.515625	0.234043	0.0449438	0.197183	0.309524	0.608696	0.618182	0.25	0.0215054	0.436364	0.102564	0.0425532	1	0.036036	0.0816327	0.0588235	0.0526316	0.0625
THCA_M528	0.275862	0.0754717	0.268293	0.0408163	0.347826	0.021978	0.09375	0.0571429	0.0625	0.253521	0.0462185	0.190476	0.352941	0.0833333	0.368421	0.290323	0.056338	0.135593	0.242424	0.347826	0.416667	0.0526316	0.0322581	0.423077	0.0597015	0.0689655	1	0.0324675	0.0576923	0.0909091	0.0677966	0.0333333
THCA_M529	0.318182	0.047619	0.363636	0	0	0.037037	0.0967742	0.0588235	0.05	0.355556	0	0.0416667	0.444444	0.0652174	0.5	0.0571429	0.0322581	0.103448	0.36	0.482759	0.307692	0.526316	0.0333333	0.458333	0.0693069	0.025	1	0.0357143	0.0862069	0.0606061	0.0833333	0.111111
BLCA_M198	1	0.34	0.571429	0.2	0	0.0333333	0.52	0.0967742	0.488889	0.133333	0.0697674	0.193182	0.0333333	0.161765	0.510638	0.471429	0.325	0.337838	0.08	0.0888889	0.0384615	0.428571	0.369565	0.125	0.283582	0.0588235	0.0408163	0.0327869	0.0847458	0.298507	0.0746269	0.241758
BLCA_M790	1	0.410256	0.542857	0.16129	0	0.0285714	0.488372	0.0980392	0.32	0.147059	0.0410959	0.148148	0.0416667	0.0943396	0.404762	0.441176	0.205882	0.318182	0.1	0.121212	0.05	0.5	0.307692	0.137931	0.275862	0.0526316	0.04	0.0408163	0.0540541	0.268293	0.0909091	0.174419
BRCA_M530	0.410256	1	0.431818	0.153846	0	0	0.351852	0.12069	0.254902	0.116279	0.06	0.159091	0.0365854	0.117647	0.333333	0.333333	0.136364	0.28	0.0909091	0.0952381	0.0625	0.357143	0.276596	0.15	0.296875	0.0454545	0.0338983	0.0344828	0.0434783	0.235294	0.0847458	0.195652
CESC_M116	0.568627	0.327586	1	0.208333	0	0.0285714	0.457627	0.0833333	0.509804	0.109091	0.0566038	0.173469	0.0333333	0.202703	0.472727	0.479167	0.234043	0.252874	0.0820896	0.0727273	0.0491803	0.428571	0.351852	0.122449	0.230769	0.0666667	0.029703	0.028169	0.0724638	0.293333	0.0694444	0.242424
CESC_M685	0.571429	0.431818	1	0.189189	0	0.025	0.565217	0.103448	0.431818	0.146341	0.0769231	0.16092	0.037037	0.136364	0.522727	0.676471	0.195122	0.333333	0.108108	0.097561	0.0638298	0.6	0.475	0.171429	0.242424	0.0869565	0.0344828	0.0350877	0.0526316	0.296875	0.0862069	0.252874
ESCA_M1323	0.292683	0.219512	0.361111	0.107143	0	0.0327869	1	0.0625	0.25	0.0701754	0.0740741	0.1	0.0666667	0.107143	0.3125	0.466667	0.16129	0.291667	0.12	0.0487805	0.0322581	0.30303	0.37037	0.0381679	0.166667	0.121212	0.0363636	0.0454545	0.0625	0.206897	0.0333333	0.16
ESCA_M1325	0.461538	0.236842	0.352941	0.12	0	0.037037	1	0.0666667	0.25	0.107143	0.0588235	0.130435	0.0416667	0.0925926	0.35	0.242424	0.178571	0.3	0.0648148	0.115385	0.0967742	0.25	0.194444	0.0869565	0.2	0.0384615	0.0416667	0.037037	0.0322581	0.189189	0.119048	0.12
ESCA_M491	0.52	0.351852	0.565217	0.125	0	0.0238095	1	0.104478	0.327273	0.117647	0.0535714	0.15625	0.0377358	0.148649	0.375	0.522727	0.204082	0.458333	0.0846154	0.0784314	0.0526316	0.406593	0.38	0.0851064	0.352941	0.0714286	0.025641	0.0298507	0.0917431	0.273973	0.106061	0.239583
ESCA_M80	0.359551	0.216495	0.378947	0.11236	0	0.030837	1	0.0818182	0.282609	0.0625	0.0416667	0.130435	0.031746	0.171171	0.244898	0.509804	0.142857	0.327434	0.0628571	0.0620155	0.037594	0.453782	0.212766	0.0482456	0.256881	0.039604	0.0409556	0.0252101	0.0679612	0.221239	0.0630631	0.214815
HNSC_M169	0.488889	0.285714	0.509804	0.184211	0	0.0350877	0.327273	0.12069	1	0.0909091	0.075	0.133333	0.0306122	0.169231	0.387755	0.414634	0.25	0.315789	0.105263	0.05	0.0576923	0.316327	0.276596	0.15	0.220588	0.0851064	0.0340909	0.0344828	0.0892857	0.253731	0.0465116	0.21875
LUAD_M105	0.510638	0.333333	0.522727	0.225	0.0172414	0.0165746	0.375	0.0952381	0.387755	0.106383	0.0930233	0.139785	0.0348837	0.0958904	1	0.512195	0.255814	0.25641	0.0952381	0.0869565	0.0535714	0.418605	0.361702	0.15	0.242857	0.0784314	0.04	0.0350877	0.0655738	0.294118	0.0735294	0.23913
LUSC_M1251	0.344828	0.297297	0.424242	0.16	0	0.0263158	0.416667	0.103448	0.238095	0.103448	0.0384615	0.0967742	0.0714286	0.0526316	0.3	1	0.16	0.227273	0.0833333	0.111111	0.0344828	0.413793	0.375	0.181818	0.196429	0.0816327	0.04	0.047619	0.0322581	0.225806	0.0434783	0.173913
LUSC_M128	0.471429	0.333333	0.43038	0.140845	0	0.0222222	0.513889	0.10989	0.388889	0.0769231	0.0487805	0.159664	0.037037	0.154639	0.368421	1	0.178082	0.534884	0.0700637	0.0512821	0.0340909	0.586538	0.263158	0.108108	0.367816	0.0481928	0.0241935	0.0212766	0.0977444	0.263158	0.0752688	0.280702
LUSC_M517	0.166667	0.14	0.233333	0.0857143	0	0.0425532	0.245283	0.0882353	0.37931	0.0833333	0.075	0.0705882	0.0357143	0.0769231	0.121212	1	0.206897	0.428571	0.0289855	0.0909091	0.030303	0.325581	0.129032	0.038961	0.169231	0.0606061	0.0285714	0.027027	0.119565	0.1	0.0566038	0.1875
LUSC_M518	0.452381	0.318182	0.676471	0.147059	0	0.0167598	0.522727	0.134615	0.414634	0.166667	0.0571429	0.116279	0.0526316	0.09375	0.512195	1	0.222222	0.321429	0.125	0.111111	0.0425532	0.5	0.5	0.2	0.262295	0.097561	0.031746	0.0384615	0.05	0.263158	0.0943396	0.209302
OV_M331	0.337838	0.28	0.30137	0.1	0	0.0232558	0.458333	0.0777778	0.217391	0.0958904	0.0512821	0.107438	0.0318021	0.102041	0.25	0.534884	0.138889	1	0.0718954	0.0540541	0.026087	0.451923	0.226667	0.0581395	0.292135	0.0306122	0.021978	0.0135135	0.0923077	0.221053	0.0786517	0.224138
OV_M561	0.236364	0.203125	0.1875	0.0943396	0	0.0298507	0.34375	0.0555556	0.304348	0.0701754	0.0677966	0.0776699	0.0350877	0.107143	0.140845	0.448718	0.166667	1	0.0431655	0.0566038	0.03125	0.425926	0.140625	0.0576923	0.246753	0.0377358	0.0181818	0.0277778	0.108108	0.168675	0.084507	0.149533
OV_M562	0.285714	0.216216	0.333333	0.181818	0	0	0.291667	0.0697674	0.173913	0.115385	0.0416667	0.15	0.0416667	0.0555556	0.25641	0.258065	0.0833333	1	0.0697674	0.0434783	0.0666667	0.407407	0.28	0.0454545	0.122807	0.0322581	0.0434783	0.04	0.037037	0.166667	0.0434783	0.2
READ_M1124	0.14	0.0909091	0.130435	0.0816327	0	0.0322581	0.246154	0.04	0.2	0.04	0.0943396	0.06	0.0202703	0.14	0.104167	0.27451	0.137255	0.416667	0.0229885	0.0408163	0.032967	1	0.0967742	0.035503	0.166667	0.0326087	0.0196078	0.0298507	0.0727273	0.0952381	0.0746269	0.12766
READ_M1125	0.5	0.357143	0.6	0.225806	0	0.0168539	0.404255	0.0943396	0.295455	0.138889	0.0277778	0.144578	0.04	0.0615385	0.418605	0.5	0.117647	0.407407	0.09375	0.0833333	0.047619	1	0.325	0.166667	0.225806	0.0689655	0.0384615	0.0392157	0.0384615	0.255814	0.0877193	0.2
READ_M1664	0.113636	0.103448	0.128205	0.0714286	0	0.037037	0.258621	0.047619	0.209302	0.047619	0.0869565	0.0652174	0.0232558	0.117647	0.097561	0.325581	0.136364	0.425926	0.0253165	0.0487805	0.0361446	1	0.111111	0.0372671	0.169014	0.0357143	0	0.0338983	0.0784314	0.105263	0.0847458	0.114286
READ_M399	0.355556	0.226804	0.389474	0.123596	0	0.0183486	0.453782	0.0714286	0.293478	0.0729167	0.05	0.121429	0.0314961	0.159292	0.308511	0.534653	0.153846	0.451923	0.0625	0.0412371	0.0291262	1	0.223404	0.0777778	0.28972	0.0392157	0.020979	0.0176991	0.0645161	0.241071	0.0625	0.240602
READ_M47	0.333333	0.277228	0.365385	0.111111	0	0.0168067	0.452381	0.0833333	0.316327	0.0660377	0.0454545	0.136054	0.0291971	0.155738	0.303922	0.586538	0.138614	0.412281	0.0591398	0.0373832	0.0344828	1	0.213592	0.0882353	0.309735	0.0357143	0.0202312	0.0162602	0.0606061	0.231405	0.0661157	0.241135
SARC_M185	0.369565	0.276596	0.475	0.138889	0.025	0.0338983	0.38	0.0892857	0.276596	0.128205	0.114286	0.1	0.05	0.107692	0.361702	0.5	0.210526	0.242424	0.0857143	0.105263	0.0408163	0.325	1	0.0857143	0.19697	0.0930233	0.047619	0.0697674	0.0555556	0.25	0.0909091	0.218391
ACC_M1675	0.35	0.0311419	0.291667	0.0833333	0.285714	0.352941	0.4	0	0.35	0.4375	0.3	0.118644	0.05	0.315789	0.242424	0.4	0.0592593	0.105263	0.333333	0.318182	0.347826	0.32	0.2	0.4375	0.380952	0.0328947	0.333333	0.5	0.151515	0.047619	0.0333333	1
BLCA_M282	1	0.0520833	0.5	0.157895	0.333333	0.333333	0.545455	0	0.6	0.473684	0.409091	0.245614	0.04	0.428571	0.314286	0.571429	0.0882353	0.130435	0.434783	0.307692	0.333333	0.357143	0.382353	0.4	0.416667	0.0384615	0.526316	0.368421	0.162162	0.024	0.0307692	0.35
CESC_M1016	0.5	0.0549828	1	0.142857	0.333333	0.333333	0.583333	0.0344828	0.636364	0.444444	0.521739	0.271186	0.0351759	0.545455	0.388889	0.681818	0.101449	0.153846	0.37037	0.407407	0.428571	0.272727	0.416667	0.391304	0.461538	0.0440252	0.434783	0.363636	0.175	0.031746	0.0289855	0.291667
COAD_M147	0.333333	0.0376712	0.333333	0.0731707	1	0.272727	0.307692	0	0.333333	0.473684	0.24	0.20339	0.020202	0.363636	0.277778	0.434783	0.0724638	0.130435	0.375	0.307692	0.384615	0.407407	0.305556	0.333333	0.478261	0.0318471	0.26087	0.368421	0.131579	0.0322581	0.0307692	0.285714
DLBC_M451	0.333333	0.0274914	0.333333	0.0810811	0.272727	1	0.375	0	0.4	0.411765	0.35	0.135593	0.0206186	0.444444	0.2	0.380952	0.0588235	0.222222	0.26087	0.304348	0.333333	0.259259	0.228571	0.5	0.25	0.0463576	0.470588	0.466667	0.181818	0.0285714	0.0327869	0.352941
ESCA_M229	0.545455	0.0445205	0.583333	0.15	0.307692	0.25	1	0.037037	0.545455	0.423077	0.375	0.280702	0.037037	0.391304	0.371429	0.521739	0.0869565	0.0769231	0.590909	0.285714	0.310345	0.25	0.4	0.304348	0.5	0.0314465	0.409091	0.333333	0.153846	0.030303	0.037037	0.318182
ESCA_M875	0.444444	0.047619	0.363636	0.117647	0.3	0.375	1	0	0.529412	0.375	0.315789	0.160714	0.0434783	0.411765	0.212121	0.421053	0.0518519	0.111111	0.35	0.217391	0.25	0.230769	0.242424	0.466667	0.333333	0.04	0.533333	0.428571	0.15625	0.0263158	0.0338983	0.4
HNSC_M750	0.6	0.0484429	0.636364	0.157895	0.333333	0.4	0.545455	0.04	1	0.473684	0.47619	0.245614	0.04	0.428571	0.314286	0.833333	0.0882353	0.181818	0.434783	0.36	0.384615	0.266667	0.382353	0.473684	0.416667	0.0451613	0.611111	0.529412	0.162162	0.0281124	0.0307692	0.35
KICH_M178	0.458333	0.0479452	0.444444	0.146341	0.346154	0.291667	0.423077	0.0487805	0.458333	1	0.478261	0.233333	0.0645161	0.375	0.4	0.44	0.110294	0.0540541	0.5	0.48	0.444444	0.322581	0.388889	0.347826	0.48	0.0377358	0.391304	0.380952	0.179487	0.0277778	0.0294118	0.363636
KICH_M753	0.473684	0.04	0.391304	0.0810811	0.473684	0.411765	0.375	0.047619	0.473684	1	0.421053	0.175439	0.04	0.368421	0.3125	0.526316	0.0827068	0.157895	0.45	0.428571	0.391304	0.36	0.34375	0.5	0.5	0.04	0.470588	0.571429	0.181818	0.0434783	0.0327869	0.4375
KIRC_M766	0.409091	0.0449827	0.521739	0.131579	0.24	0.35	0.375	0	0.47619	0.478261	1	0.25	0.0416667	0.526316	0.363636	0.454545	0.0888889	0.190476	0.391304	0.5	0.458333	0.275862	0.393939	0.421053	0.375	0.0454545	0.473684	0.315789	0.2	0.0323887	0.03125	0.3
LIHC_M624	0.428571	0.0487805	0.545455	0.135135	0.363636	0.444444	0.411765	0	0.428571	0.375	0.526316	0.254545	0.025641	1	0.333333	0.47619	0.0814815	0.2	0.347826	0.391304	0.478261	0.333333	0.40625	0.529412	0.333333	0.0457516	0.588235	0.411765	0.205882	0.0325203	0.031746	0.315789
LUAD_M1126	0.314286	0.0602007	0.388889	0.0943396	0.277778	0.2	0.371429	0.025641	0.314286	0.4	0.363636	0.307692	0.0334928	0.333333	1	0.342857	0.109589	0.0810811	0.382353	0.333333	0.428571	0.268293	0.386364	0.235294	0.411765	0.0352941	0.264706	0.290323	0.117647	0.026616	0.0444444	0.242424
LUSC_M265	0.571429	0.0519031	0.681818	0.125	0.434783	0.380952	0.521739	0.0384615	0.833333	0.526316	0.454545	0.241379	0.0384615	0.47619	0.342857	1	0.0955882	0.173913	0.36	0.4	0.423077	0.344828	0.411765	0.526316	0.521739	0.0448718	0.5	0.588235	0.157895	0.028	0.030303	0.4
PAAD_M351	0.434783	0.0446735	0.37037	0.125	0.375	0.26087	0.590909	0.0384615	0.434783	0.5	0.391304	0.309091	0.0384615	0.347826	0.382353	0.36	0.0875912	0.08	1	0.346154	0.48	0.344828	0.411765	0.26087	0.521739	0.0316456	0.363636	0.35	0.157895	0.03125	0.0384615	0.333333
PCPG_M907	0.307692	0.0409556	0.407407	0.121951	0.307692	0.304348	0.285714	0.0487805	0.36	0.48	0.5	0.196721	0.111111	0.391304	0.333333	0.4	0.0948905	0.166667	0.346154	1	0.407407	0.290323	0.324324	0.363636	0.384615	0.0416667	0.347826	0.333333	0.153846	0.0526316	0.0967742	0.318182
PRAD_M26	0.333333	0.0586207	0.428571	0.116279	0.384615	0.333333	0.310345	0	0.384615	0.444444	0.458333	0.339286	0.0351759	0.478261	0.428571	0.423077	0.101449	0.153846	0.48	0.407407	1	0.354839	0.378378	0.391304	0.52	0.0440252	0.32	0.428571	0.175	0.0358566	0.0289855	0.347826
READ_M283	0.357143	0.0474576	0.272727	0.0869565	0.407407	0.259259	0.25	0.0273973	0.266667	0.36	0.275862	0.203125	0.0606061	0.333333	0.268293	0.344828	0.0769231	0.103448	0.344828	0.290323	0.354839	1	0.325	0.307692	0.37931	0.037037	0.25	0.28	0.139535	0.0555556	0.0363636	0.32
SARC_M505	0.382353	0.0779661	0.416667	0.113208	0.305556	0.228571	0.4	0.0263158	0.382353	0.388889	0.393939	0.387097	0.031746	0.40625	0.386364	0.411765	0.108844	0.108108	0.411765	0.324324	0.378378	0.325	1	0.30303	0.324324	0.0411765	0.333333	0.28125	0.137255	0.0379747	0.025	0.204545
SKCM_M225	0.4	0.0381944	0.391304	0.111111	0.333333	0.5	0.466667	0	0.473684	0.5	0.421053	0.155172	0.0259067	0.529412	0.235294	0.526316	0.0666667	0.222222	0.26087	0.363636	0.391304	0.307692	0.30303	1	0.304348	0.0463576	0.5625	0.571429	0.181818	0.0285714	0.0327869	0.4375
STAD_M187	0.416667	0.04811	0.461538	0.0952381	0.478261	0.25	0.5	0.025641	0.416667	0.5	0.375	0.280702	0.037037	0.333333	0.411765	0.521739	0.102941	0.0769231	0.521739	0.384615	0.52	0.37931	0.324324	0.304348	1	0.0314465	0.291667	0.4	0.153846	0.0238095	0.0298507	0.380952
THCA_M670	0.526316	0.0416667	0.434783	0.138889	0.26087	0.470588	0.533333	0.0183486	0.611111	0.470588	0.473684	0.214286	0.0205128	0.588235	0.264706	0.5	0.0740741	0.210526	0.363636	0.347826	0.32	0.25	0.333333	0.5625	0.291667	0.0460526	1	0.4375	0.176471	0.0284553	0.0322581	0.333333
THYM_M48	0.368421	0.03125	0.363636	0.0555556	0.368421	0.466667	0.428571	0	0.529412	0.571429	0.315789	0.140351	0.026178	0.411765	0.290323	0.588235	0.0676692	0.176471	0.35	0.333333	0.428571	0.28	0.28125	0.571429	0.4	0.0434783	0.4375	1	0.15625	0.025641	0.0338983	0.5
ACC_M905	0.736842	0.5	0.521739	0.333333	0.608696	0.5	0.55	0.0408163	0.56	0.0754717	0.7	0.481481	0.4	0.434783	0	0.5	0.405405	0.461538	0.34375	0.133333	0.107692	0.275862	0.269231	0.5	0.5	0.147059	0.25	0.611111	0.5	0.357143	0.125	1
BLCA_M247	1	0.588235	0.52381	0.321429	0.619048	0.5	0.555556	0.0163934	0.565217	0.0663507	0.722222	0.48	0.393939	0.428571	0	0.555556	0.4	0.521739	0.37931	0.142857	0.078125	0.259259	0.26	0.571429	0.56	0.16129	0.275862	0.625	0.5	0.346154	0.112903	0.736842
BRCA_M301	0.588235	1	0.380952	0.259259	0.47619	0.263158	0.5625	0.0123967	0.434783	0.0471698	0.473684	0.36	0.264706	0.285714	0	0.392857	0.277778	0.333333	0.37037	0.097561	0.0689655	0.24	0.176471	0.428571	0.384615	0.178571	0.307692	0.4375	0.263158	0.230769	0.1	0.5
CESC_M1488	0.52381	0.380952	1	0.258065	0.44	0.318182	0.428571	0.0540541	0.461538	0.0607477	0.5	0.344828	0.297297	0.28	0.0392157	0.375	0.307692	0.37037	0.272727	0.111111	0.0757576	0.241379	0.226415	0.458333	0.366667	0.117647	0.21875	0.473684	0.45	0.275862	0.0757576	0.521739
COAD_M315	0.619048	0.47619	0.44	0.322581	1	0.409091	0.6	0.0258065	0.538462	0.0700935	0.666667	0.518519	0.351351	0.36	0.0217391	0.4375	0.358974	0.444444	0.419355	0.130435	0.0735294	0.310345	0.240741	0.48	0.482759	0.142857	0.28125	0.5	0.409091	0.3	0.123077	0.608696
DLBC_M598	0.5	0.263158	0.318182	0.214286	0.409091	1	0.315789	0.0416667	0.375	0.0471698	0.555556	0.36	0.264706	0.285714	0.0357143	0.344828	0.277778	0.333333	0.193548	0.0714286	0.1	0.148148	0.176471	0.4375	0.333333	0.0952381	0.0967742	0.533333	0.5	0.28	0.0645161	0.5
ESCA_M3	0.555556	0.5625	0.428571	0.346154	0.6	0.315789	1	0.0165289	0.545455	0.056872	0.611111	0.458333	0.333333	0.4	0	0.37931	0.305556	0.375	0.407407	0.121951	0.0677966	0.333333	0.196078	0.47619	0.423077	0.214286	0.346154	0.6	0.315789	0.32	0.116667	0.55
HNSC_M1360	0.565217	0.434783	0.461538	0.30303	0.538462	0.375	0.545455	0.016	1	0.0744186	0.608696	0.433333	0.333333	0.333333	0.0454545	0.411765	0.341463	0.413793	0.4375	0.102041	0.0714286	0.25	0.232143	0.5	0.451613	0.135135	0.264706	0.52381	0.375	0.322581	0.102941	0.56
KIRC_M668	0.722222	0.473684	0.5	0.310345	0.666667	0.555556	0.611111	0.0217391	0.608696	0.07109	1	0.583333	0.382353	0.47619	0	0.482759	0.388889	0.565217	0.366667	0.139535	0.09375	0.346154	0.254902	0.545455	0.538462	0.15625	0.266667	0.6875	0.555556	0.333333	0.129032	0.7
KIRP_M1144	0.48	0.36	0.344828	0.257143	0.518519	0.36	0.458333	0.0282258	0.433333	0.0642202	0.583333	1	0.292683	0.321429	0	0.361111	0.302326	0.4	0.305556	0.122449	0.0704225	0.28125	0.22807	0.37931	0.393939	0.131579	0.222222	0.434783	0.36	0.235294	0.117647	0.481481
LIHC_M627	0.428571	0.285714	0.28	0.233333	0.36	0.285714	0.4	0.0666667	0.333333	0.0465116	0.47619	0.321429	0.277778	1	0	0.3125	0.25641	0.296296	0.212121	0.116279	0.0655738	0.214286	0.166667	0.269231	0.3	0.16129	0.233333	0.444444	0.285714	0.25	0.131148	0.434783
LUSC_M861	0.555556	0.392857	0.375	0.25641	0.4375	0.344828	0.37931	0.037037	0.411765	0.0675676	0.482759	0.361111	0.318182	0.3125	0.027027	1	0.326087	0.342857	0.268293	0.111111	0.08	0.243243	0.229508	0.363636	0.378378	0.116279	0.195122	0.407407	0.344828	0.27027	0.109589	0.5
MESO_M757	0.4	0.277778	0.307692	0.244444	0.358974	0.277778	0.305556	0.0392157	0.341463	0.079646	0.388889	0.302326	0.27451	0.25641	0.030303	0.326087	1	0.285714	0.229167	0.0983607	0.0731707	0.261905	0.205882	0.3	0.318182	0.1	0.166667	0.323529	0.277778	0.227273	0.1	0.405405
OV_M153	0.521739	0.333333	0.37037	0.2	0.444444	0.333333	0.375	0.0434783	0.413793	0.0599078	0.565217	0.4	0.275	0.296296	0.0384615	0.342857	0.285714	1	0.285714	0.12766	0.0724638	0.258065	0.192982	0.461538	0.419355	0.138889	0.2	0.409091	0.391304	0.212121	0.0882353	0.461538
PAAD_M663	0.37931	0.37037	0.272727	0.205128	0.419355	0.193548	0.407407	0.1	0.4375	0.125	0.366667	0.305556	0.217391	0.212121	0.0869565	0.268293	0.229167	0.285714	1	0.0943396	0.0714286	0.189189	0.177419	0.34375	0.324324	0.121951	0.236842	0.285714	0.193548	0.184211	0.0821918	0.34375
SKCM_M1399	0.444444	0.277778	0.333333	0.178571	0.363636	0.4375	0.333333	0.0225564	0.391304	0.0473934	0.421053	0.269231	0.2	0.130435	0.0454545	0.266667	0.216216	0.347826	0.241379	0.05	0.0655738	0.111111	0.134615	1	0.346154	0.0793651	0.137931	0.375	0.352941	0.24	0.0606061	0.380952
SKCM_M767	0.571429	0.428571	0.458333	0.25	0.48	0.304348	0.47619	0.0540541	0.5	0.0654206	0.545455	0.37931	0.289474	0.269231	0.0344828	0.363636	0.3	0.461538	0.34375	0.108696	0.0625	0.233333	0.2	1	0.448276	0.147059	0.25	0.45	0.363636	0.266667	0.0909091	0.5
STAD_M1114	0.56	0.384615	0.366667	0.243243	0.482759	0.333333	0.423077	0.0227273	0.451613	0.0684932	0.538462	0.393939	0.309524	0.3	0.0392157	0.378378	0.318182	0.419355	0.324324	0.117647	0.0684932	0.228571	0.220339	0.448276	1	0.125	0.277778	0.4	0.384615	0.294118	0.0985915	0.5
THYM_M1121	0.625	0.4375	0.473684	0.32	0.5	0.533333	0.6	0.0124481	0.52381	0.052381	0.6875	0.434783	0.354839	0.444444	0	0.407407	0.323529	0.409091	0.285714	0.1	0.0833333	0.25	0.204082	0.45	0.4	0.142857	0.222222	1	0.533333	0.347826	0.101695	0.611111
UCEC_M943	0.5	0.263158	0.45	0.214286	0.409091	0.5	0.315789	0.0645161	0.375	0.0471698	0.555556	0.36	0.264706	0.285714	0	0.344828	0.277778	0.391304	0.193548	0.097561	0.1	0.24	0.2	0.363636	0.384615	0.0952381	0.0967742	0.533333	1	0.185185	0.0645161	0.5
BLCA_M1092	1	0.423077	0.56	0.170732	0	0.135135	0.52	0.28	0.26087	0.105769	0.111111	0.0727273	0.181818	0.184615	0.317073	0.3125	0.228571	0.40625	0.233333	0.133333	0.111111	0.230769	0.32	0.091954	0.347826	0.0675676	0.0909091	0.0487805	0.344828	0.421053	0.0555556	0.233333
BLCA_M434	1	0.33871	0.347826	0.164179	0	0.0897436	0.283019	0.169811	0.258824	0.141732	0.0833333	0.0853659	0.189655	0.258824	0.448276	0.425	0.140625	0.315789	0.196429	0.0983607	0.0769231	0.275862	0.454545	0.126126	0.270833	0.0582524	0.047619	0.030303	0.189655	0.354839	0.0461538	0.178571
BRCA_M1283	0.423077	1	0.481481	0.139535	0	0.162162	0.392857	0.375	0.25	0.0841121	0.09375	0.0526316	0.212121	0.164179	0.309524	0.387097	0.294118	0.4375	0.310345	0.166667	0.0789474	0.184211	0.342105	0.129412	0.230769	0.0555556	0.0769231	0.0731707	0.290323	0.486486	0.0465116	0.357143
BRCA_M187	0.256098	1	0.315789	0.19403	0	0.112676	0.254237	0.169492	0.272727	0.206349	0.2	0.127119	0.206349	0.5	0.326087	0.390805	0.253521	0.350877	0.181818	0.140496	0.0828402	0.241379	0.263158	0.294118	0.4	0.115385	0.0923077	0.0666667	0.214286	0.58209	0.0533333	0.257576
BRCA_M704	0.33871	1	0.37931	0.12069	0	0.156863	0.309524	0.25641	0.216216	0.137931	0.155556	0.0857143	0.302326	0.27027	0.416667	0.507463	0.2	0.512195	0.227273	0.133333	0.0653595	0.173077	0.367347	0.178947	0.230769	0.0786517	0.0545455	0.0526316	0.244444	0.510638	0.0517241	0.227273
CESC_M536	0.56	0.481481	1	0.214286	0	0.153846	0.518519	0.296296	0.28	0.134615	0.105263	0.0877193	0.235294	0.230769	0.425	0.363636	0.243243	0.5	0.333333	0.111111	0.102564	0.236842	0.358974	0.126437	0.478261	0.0649351	0.0833333	0.0697674	0.272727	0.461538	0.0789474	0.290323
ESCA_M209	0.52	0.392857	0.518519	0.136364	0	0.1	1	0.307692	0.291667	0.103774	0.148148	0.0892857	0.171429	0.161765	0.37037	0.375	0.216216	0.424242	0.21875	0.125	0.105263	0.243243	0.346154	0.09375	0.434783	0.0540541	0.0857143	0.0465116	0.28125	0.4	0.0526316	0.21875
LGG_M580	0.214286	0.302326	0.258065	0.0697674	0	0.097561	0.233333	0.129032	0.347826	0.150943	0.291667	0.107143	1	0.176471	0.239437	0.451613	0.166667	0.454545	0.25	0.09375	0.0454545	0.125	0.241379	0.0888889	0.228571	0.0649351	0.0666667	0.0454545	0.269231	0.357143	0.0526316	0.180328
LIHC_M94	0.258824	0.5	0.316456	0.2	0	0.103448	0.238095	0.148148	0.257143	0.164179	0.15493	0.132231	0.176471	1	0.285714	0.27551	0.207792	0.285714	0.169492	0.138462	0.0685714	0.206349	0.318841	0.259259	0.306452	0.100917	0.102941	0.0632911	0.2	0.447368	0.0675676	0.29771
LUAD_M178	0.448276	0.309524	0.425	0.222222	0	0.106061	0.333333	0.219512	0.283784	0.146552	0.114286	0.084507	0.23913	0.25	1	0.324675	0.173077	0.369565	0.25	0.116279	0.115385	0.319149	0.446809	0.118812	0.324324	0.0430108	0.0588235	0.0517241	0.212766	0.358491	0.0566038	0.27907
LUAD_M27	0.385542	0.416667	0.333333	0.154762	0.0173913	0.11828	0.194444	0.182927	0.22973	0.233083	0.135135	0.0958904	0.239437	0.285714	1	0.511364	0.121951	0.342857	0.162162	0.111111	0.0893855	0.223684	0.375	0.152	0.19403	0.0578512	0.0588235	0.034965	0.161765	0.337662	0.0449438	0.229167
LUAD_M536	0.25	0.241379	0.357143	0.0930233	0	0.0512821	0.37037	0.125	0.166667	0.14	0.0925926	0.0740741	0.225806	0.101449	1	0.366667	0.107143	0.375	0.241379	0.107143	0.0540541	0.194444	0.185185	0.0681818	0.5	0.0322581	0.0606061	0.0540541	0.151515	0.292683	0.0487805	0.16129
LUSC_M198	0.425	0.507463	0.3875	0.129412	0	0.107527	0.228571	0.198758	0.201923	0.13986	0.136986	0.0918367	0.225352	0.27551	0.511364	1	0.1375	0.385714	0.180556	0.0897436	0.0718232	0.190083	0.380282	0.172131	0.19697	0.0583333	0.0431034	0.0340909	0.175676	0.416667	0.0361446	0.193878
LUSC_M703	0.3125	0.475	0.363636	0.125	0.00983607	0.170732	0.375	0.1875	0.307692	0.185185	0.307692	0.12069	0.451613	0.169014	0.366667	1	0.195122	0.7	0.264706	0.142857	0.0482759	0.190476	0.3	0.114286	0.37037	0.0493827	0.0606061	0.0425532	0.333333	0.578947	0.047619	0.171875
OV_M764	0.40625	0.512195	0.5	0.163265	0	0.186047	0.424242	0.322581	0.321429	0.196429	0.275862	0.133333	0.454545	0.228571	0.375	0.7	0.268293	1	0.352941	0.138889	0.0652174	0.232558	0.3125	0.142857	0.428571	0.047619	0.0638298	0.0612245	0.3	0.615385	0.06	0.243243
SARC_M132	0.454545	0.367347	0.4	0.192308	0	0.131148	0.3	0.314286	0.246575	0.102564	0.0909091	0.0735294	0.204545	0.318841	0.446809	0.380282	0.1875	0.311111	0.214286	0.133333	0.102041	0.26087	1	0.184783	0.184211	0.0769231	0.0638298	0.0555556	0.204545	0.333333	0.04	0.307692
STAD_M731	0.347826	0.230769	0.478261	0.131579	0	0.0416667	0.434783	0.173913	0.2	0.152174	0.111111	0.148936	0.214286	0.125	0.5	0.37037	0.0857143	0.428571	0.28	0.08	0.129032	0.3	0.184211	0.0833333	1	0.0454545	0.107143	0.0416667	0.172414	0.361111	0.0540541	0.163636
UCS_M258	0.301887	0.58209	0.384615	0.169231	0	0.102941	0.290909	0.203704	0.25	0.22314	0.174603	0.162162	0.263158	0.447368	0.282609	0.415094	0.197183	0.444444	0.22807	0.118644	0.0783133	0.236364	0.257576	0.242718	0.283019	0.0873786	0.0983607	0.0555556	0.207547	1	0.0597015	0.236641
UCS_M823	0.421053	0.510638	0.461538	0.137931	0	0.132075	0.4	0.282051	0.210526	0.1875	0.210526	0.149254	0.357143	0.266667	0.358491	0.578947	0.22	0.615385	0.27907	0.130435	0.0740741	0.215686	0.333333	0.153061	0.361111	0.0543478	0.0588235	0.0517241	0.266667	1	0.0508475	0.225352
BLCA_M72	1	0.404255	0.4	0.244898	0.488372	0.0540541	0.111675	0.0703125	0.446809	0.235294	0.377358	0.322581	0.212121	0.390244	0.375	0.5	0.432432	0.057508	0.0948276	0.4	0.131579	0.351852	0.323529	0.513514	0.34375	0.228571	0.318182	0.09375	0.358974	0.28125	0.333333	0.322581
BRCA_M296	0.404255	1	0.489796	0.224138	0.510204	0.0425532	0.145	0.0729927	0.402985	0.181818	0.360656	0.307692	0.190476	0.313725	0.333333	0.388889	0.285714	0.072327	0.096	0.340909	0.129412	0.33871	0.222222	0.469388	0.261905	0.21519	0.283019	0.0849057	0.4	0.275	0.288889	0.243902
CESC_M1018	0.4	0.489796	1	0.22449	0.479167	0.0454545	0.124378	0.0746269	0.339286	0.225	0.333333	0.297297	0.205128	0.333333	0.298851	0.410256	0.333333	0.0764331	0.107438	0.333333	0.134146	0.333333	0.209302	0.408163	0.219512	0.24	0.226415	0.0980392	0.463415	0.263158	0.27907	0.263158
CESC_M1509	0.378378	0.386364	1	0.170732	0.372093	0.0625	0.0918367	0.0731707	0.285714	0.275862	0.283019	0.241379	0.25	0.3	0.202381	0.30303	0.333333	0.0653595	0.0990991	0.333333	0.125	0.283019	0.176471	0.325581	0.225806	0.227273	0.204545	0.0869565	0.5	0.333333	0.30303	0.285714
COAD_M72	0.488372	0.510204	0.479167	0.232143	1	0.0444444	0.140704	0.0820896	0.381818	0.190476	0.396552	0.361111	0.230769	0.382979	0.310345	0.365854	0.355556	0.0727848	0.097561	0.325581	0.146341	0.421053	0.325	0.4	0.275	0.220779	0.294118	0.107843	0.418605	0.324324	0.3125	0.25641
HNSC_M1385	0.446809	0.368421	0.339286	0.196721	0.381818	0.05	0.143564	0.0719424	1	0.173913	0.307692	0.204545	0.181818	0.232143	0.242105	0.342105	0.226415	0.0619195	0.0944882	0.270833	0.126437	0.268657	0.266667	0.37037	0.195652	0.166667	0.296296	0.0934579	0.354167	0.261905	0.22449	0.232558
HNSC_M760	0.4	0.402985	0.338235	0.186667	0.373134	0.0416667	0.181818	0.0645161	1	0.129032	0.346667	0.189655	0.133333	0.231884	0.288462	0.37234	0.246154	0.0684524	0.0839161	0.203125	0.117647	0.2625	0.196721	0.428571	0.183333	0.175258	0.297297	0.0813008	0.265625	0.189655	0.1875	0.169492
KIRC_M178	0.377358	0.360656	0.333333	0.21875	0.396552	0.037037	0.140097	0.0694444	0.346667	0.156863	1	0.234043	0.163265	0.396226	0.294737	0.289157	0.296296	0.0609756	0.107692	0.222222	0.144444	0.267606	0.265306	0.410714	0.22449	0.183908	0.25	0.109091	0.272727	0.208333	0.203704	0.183673
KIRP_M488	0.322581	0.307692	0.297297	0.318182	0.361111	0.0434783	0.0680628	0.0517241	0.204545	0.227273	0.36	1	0.25	0.388889	0.290323	0.5	0.357143	0.0454545	0.0769231	0.259259	0.0757576	0.26087	0.25	0.322581	0.473684	0.145161	0.264706	0.0833333	0.4	0.238095	0.32	0.238095
LUAD_M1523	0.375	0.27451	0.265306	0.181818	0.235294	0.0512821	0.0686275	0.0425532	0.220588	0.108108	0.230769	0.290323	0.114286	0.166667	1	0.424242	0.268293	0.0377358	0.0769231	0.263158	0.0493827	0.2	0.1	0.25	0.3125	0.118421	0.196429	0.0612245	0.2	0.142857	0.175	0.111111
LUSC_M1652	0.5	0.380952	0.410256	0.285714	0.365854	0.0689655	0.0876289	0.057377	0.304348	0.214286	0.28125	0.5	0.230769	0.289474	0.424242	1	0.363636	0.0453074	0.0818182	0.28125	0.0833333	0.25	0.193548	0.411765	0.4	0.181818	0.219512	0.0777778	0.346154	0.222222	0.290323	0.222222
MESO_M1416	0.432432	0.285714	0.333333	0.234043	0.355556	0.0588235	0.0854271	0.046875	0.246154	0.147059	0.352941	0.357143	0.15625	0.285714	0.268293	0.363636	1	0.044586	0.0782609	0.210526	0.0921053	0.272727	0.2	0.432432	0.37931	0.169014	0.27451	0.0857143	0.282051	0.151515	0.184211	0.151515
READ_M987	0.351852	0.33871	0.333333	0.186441	0.421053	0.037037	0.129187	0.0694444	0.268657	0.156863	0.267606	0.26087	0.163265	0.298246	0.277108	0.304878	0.272727	0.0674847	0.107692	0.269231	0.119565	1	0.192308	0.338983	0.22449	0.211765	0.214286	0.109091	0.296296	0.208333	0.25	0.208333
SKCM_M1393	0.513514	0.434783	0.369565	0.270833	0.391304	0.0344828	0.117347	0.0703125	0.377049	0.272727	0.403846	0.322581	0.212121	0.390244	0.25	0.411765	0.432432	0.0608974	0.114035	0.289474	0.162162	0.303571	0.323529	1	0.34375	0.228571	0.36	0.117021	0.325	0.242424	0.263158	0.28125
SKCM_M758	0.512195	0.469388	0.408163	0.264151	0.4	0.04	0.136364	0.0671642	0.428571	0.230769	0.410714	0.305556	0.179487	0.369565	0.244898	0.384615	0.404762	0.0698413	0.117647	0.27907	0.15	0.338983	0.307692	1	0.289474	0.260274	0.321429	0.121212	0.340909	0.205128	0.285714	0.27027
STAD_M1310	0.34375	0.261905	0.225806	0.212121	0.275	0.04	0.0618557	0.0420168	0.195652	0.16	0.384615	0.473684	0.173913	0.285714	0.3125	0.4	0.37931	0.0416667	0.0654206	0.241379	0.0735294	0.22449	0.185185	0.34375	1	0.123077	0.25	0.12	0.304348	0.166667	0.206897	0.166667
UCEC_M412	0.358974	0.4	0.5	0.219512	0.418605	0.0588235	0.102041	0.0806452	0.354167	0.3	0.272727	0.310345	0.275862	0.35	0.197674	0.323529	0.282051	0.0649351	0.127273	0.314286	0.169014	0.296296	0.235294	0.340909	0.25	0.202899	0.222222	0.111111	1	0.357143	0.323529	0.310345
UCEC_M947	0.30303	0.325	0.461538	0.212121	0.342105	0.037037	0.0673575	0.0689655	0.25	0.26087	0.241379	0.4	0.35	0.222222	0.2	0.346154	0.25	0.042623	0.0961538	0.333333	0.123077	0.22449	0.230769	0.264706	0.304348	0.15873	0.216216	0.0769231	1	0.4	0.346154	0.333333
SKCM_M182	0.466667	0.433962	0.377358	0.245614	0.37037	0.0379747	0.133663	0.0652174	0.402985	0.209302	0.383333	0.275	0.162791	0.34	0.226415	0.348837	0.369565	0.0689655	0.113821	0.255319	0.142857	0.31746	0.27907	1	0.261905	0.246753	0.3	0.116505	0.3125	0.186047	0.26087	0.243902
BRCA_M200	0.266667	1	0.59375	0.133333	0	0.0606061	0.521739	0.129032	0.517241	0.0909091	0.114286	0.0740741	0.0793651	0.178571	0.540541	0.394737	0.15	0.515152	0.375	0.142857	0.25	0.259259	0.5625	0.206897	0.24	0.0571429	0.125	0.0625	0.666667	0.484848	0.153846	0.145833
BRCA_M730	0.166667	1	0.444444	0.190476	0	0.047619	0.571429	0.0909091	0.458333	0.047619	0.114286	0.03125	0.0925926	0.142857	0.297297	0.333333	0.15	0.4375	0.333333	0.107143	0.181818	0.190476	0.413793	0.130435	0.0615385	0.0769231	0.111111	0.047619	0.55	0.37931	0.16129	0.105263
CESC_M1053	0.27027	0.59375	1	0.102564	0.0243902	0.0731707	0.419355	0.166667	0.472222	0.0697674	0.116279	0.0806452	0.1	0.2	0.609756	0.377778	0.171429	0.638889	0.272727	0.0888889	0.222222	0.194444	0.594595	0.257143	0.212121	0.0526316	0.125	0.075	0.53125	0.567568	0.148936	0.254902
CESC_M1564	0.25	0.444444	1	0.173913	0	0.0172414	0.5	0.181818	0.275862	0.0434783	0.108108	0.04	0.0892857	0.238095	0.25	0.314286	0.136364	0.315789	0.238095	0.1	0.166667	0.125	0.264706	0.16	0.0714286	0.0434783	0.142857	0.08	0.375	0.368421	0.151515	0.12069
CESC_M1565	0.380952	0.423077	1	0.0810811	0.037037	0.111111	0.153846	0.111111	0.3	0.0666667	0.172414	0.104167	0.0655738	0.0851064	0.405405	0.304348	0.125	0.40625	0.166667	0.0384615	0.25	0.16	0.40625	0.304348	0.3	0.04	0.113636	0.0740741	0.296296	0.375	0.0909091	0.219512
ESCA_M243	0.125	0.529412	0.473684	0.173913	0	0.0434783	1	0.166667	0.423077	0.0434783	0.108108	0.0416667	0.0892857	0.238095	0.351351	0.277778	0.190476	0.387097	0.3	0.137931	0.166667	0.173913	0.433333	0.125	0.0909091	0.0909091	0.142857	0.0434783	0.5	0.444444	0.117647	0.12069
ESCA_M906	0.1	0.571429	0.5	0.15	0	0.0526316	1	0.142857	0.375	0.0526316	0.121212	0.05	0.0754717	0.222222	0.333333	0.3	0.235294	0.3125	0.222222	0.115385	0.2	0.15	0.344828	0.0952381	0.111111	0.0833333	0.166667	0.0454545	0.45	0.466667	0.0967742	0.12963
HNSC_M105	0.212121	0.517241	0.472222	0.125	0	0.0882353	0.423077	0.166667	1	0.0540541	0.111111	0.0714286	0.09375	0.346154	0.404762	0.410256	0.172414	0.444444	0.4	0.105263	0.275862	0.285714	0.529412	0.193548	0.32	0.0540541	0.171429	0.0588235	0.555556	0.457143	0.146341	0.117647
LUAD_M1411	0.285714	0.333333	0.484848	0.0666667	0.0333333	0.1	0.269231	0.148148	0.4	0.0606061	0.109091	0.0566038	0.0789474	0.192308	1	0.19697	0.153846	0.5	0.347826	0.0857143	0.269231	0.28	0.454545	0.269231	0.318182	0.0344828	0.130435	0.0666667	0.407407	0.46875	0.131579	0.177778
LUAD_M231	0.357798	0.243902	0.311111	0.0555556	0.0297619	0.0327103	0.267327	0.251309	0.318182	0.101124	0.215686	0.146341	0.179245	0.211765	1	0.329545	0.151899	0.352273	0.13913	0.122222	0.0909091	0.125	0.430108	0.161905	0.166667	0.0645161	0.122951	0.0413793	0.202381	0.235955	0.0707071	0.285714
LUAD_M789	0.261905	0.540541	0.609756	0.0888889	0.0212766	0.0638298	0.351351	0.164286	0.404762	0.0851064	0.102041	0.0895522	0.0943396	0.170732	1	0.352113	0.146341	0.547619	0.263158	0.1	0.190476	0.195122	0.585366	0.25	0.179487	0.04	0.112903	0.0425532	0.447368	0.488372	0.111111	0.22807
LUSC_M460	0.230769	0.394737	0.377778	0.153846	0	0.0454545	0.277778	0.189189	0.410256	0.119048	0.113208	0.047619	0.136364	0.257143	0.333333	1	0.117647	0.355556	0.257143	0.0888889	0.210526	0.184211	0.326087	0.125	0.135135	0.0434783	0.162791	0.0465116	0.307692	0.25	0.142857	0.136986
OV_M1045	0.166667	0.4375	0.315789	0.142857	0.027027	0.0434783	0.3125	0.210526	0.307692	0.0416667	0.0857143	0.0275229	0.0740741	0.15	0.205128	0.264706	0.125	1	0.277778	0.0714286	0.136364	0.142857	0.25	0.136364	0.166667	0.0384615	0.0740741	0.0434783	0.363636	0.258065	0.166667	0.0714286
OV_M569	0.314286	0.515152	0.638889	0.135135	0.025	0.102564	0.387097	0.194444	0.444444	0.047619	0.0923077	0.0645161	0.101449	0.205882	0.547619	0.369231	0.176471	1	0.28125	0.116279	0.194444	0.272727	0.657143	0.30303	0.258065	0.0540541	0.107143	0.0540541	0.6	0.628571	0.152174	0.235294
SARC_M166	0.236364	0.384615	0.472727	0.0847458	0.016129	0.0655738	0.276316	0.202312	0.321429	0.0819672	0.134146	0.0932203	0.175	0.127273	0.474576	0.337349	0.0877193	0.428571	0.188679	0.111111	0.160714	0.163636	1	0.197368	0.150943	0.0461538	0.105263	0.0491803	0.346154	0.385965	0.119403	0.202128
SARC_M639	0.393939	0.5625	0.594595	0.135135	0.025	0.102564	0.433333	0.194444	0.529412	0.1	0.0769231	0.0819672	0.101449	0.171429	0.585366	0.348485	0.142857	0.657143	0.322581	0.116279	0.228571	0.272727	1	0.30303	0.258065	0.0540541	0.127273	0.0540541	0.6	0.628571	0.152174	0.211538
UCEC_M255	0.285714	0.666667	0.53125	0.142857	0	0.0645161	0.5	0.178571	0.555556	0.0625	0.0952381	0.0566038	0.0819672	0.192308	0.447368	0.307692	0.2	0.6	0.347826	0.151515	0.222222	0.333333	0.6	0.269231	0.26087	0.0294118	0.130435	0.0740741	1	0.62069	0.162162	0.152174
UCS_M294	0.285714	0.484848	0.567568	0.108108	0.025641	0.0769231	0.354839	0.166667	0.457143	0.047619	0.0784314	0.0655738	0.102941	0.142857	0.488372	0.275362	0.181818	0.628571	0.290323	0.119048	0.2	0.242424	0.628571	0.3125	0.225806	0.0421053	0.109091	0.0555556	0.62069	1	0.130435	0.215686
UCS_M890	0.25	0.333333	0.368421	0.0869565	0	0.0416667	0.466667	0.238095	0.296296	0.04	0.114286	0.0434783	0.0967742	0.2	0.297297	0.272727	0.0882353	0.366667	0.333333	0.192308	0.181818	0.136364	0.366667	0.3	0.1	0.0322581	0.153846	0.016129	0.47619	1	0.0909091	0.121951
BRCA_M231	0.30303	1	0.419355	0.178571	0	0.03125	0.296296	0.470588	0.421053	0.241379	0.265306	0.454545	0.285714	0.366667	0.588235	0.410256	0.0921053	0.540541	0.266667	0.25	0.097561	0.304348	0.384615	0.25	0.384615	0.15625	0.0869565	0.0714286	0.423077	0.382353	0.0689655	0.205882
CESC_M1567	0.241379	0.419355	1	0.0571429	0.0285714	0.030303	0.21875	0.35	0.392857	0.111111	0.178571	0.241379	0.240741	0.166667	0.380952	0.357143	0.0740741	0.352941	0.272727	0.214286	0.0704225	0.307692	0.176471	0.241379	0.290323	0.138889	0.0769231	0.0625	0.322581	0.342105	0.027027	0.178082
ESCA_M244	0.227273	0.296296	0.21875	0.0625	0	0.0416667	1	0.375	0.2	0.107143	0.105263	0.227273	0.137255	0.368421	0.409091	0.380952	0.0425532	0.321429	0.222222	0.0869565	0.0526316	0.25	0.118644	0.125	0.55	0.142857	0.0645161	0.0377358	0.28	0.105263	0.0333333	0.115942
GBM_M1346	0.217391	0.407407	0.3125	0.148148	0.03125	0.0322581	0.375	1	0.238095	0.0967742	0.176471	0.5	0.22	0.26087	0.405405	0.292683	0.0540541	0.37931	0.241379	0.166667	0.102564	0.333333	0.172414	0.111111	0.36	0.129032	0.0909091	0.0571429	0.346154	0.216216	0.0322581	0.15942
GBM_M734	0.263158	0.470588	0.35	0.131579	0.0227273	0.0304878	0.323529	1	0.306122	0.15	0.180328	0.354839	0.280702	0.205882	0.454545	0.382979	0.0689655	0.425532	0.230769	0.142857	0.0784314	0.333333	0.179487	0.2	0.352941	0.119048	0.103896	0.0617284	0.382353	0.266667	0.0232558	0.226667
HNSC_M1575	0.227273	0.296296	0.392857	0.0625	0	0.0416667	0.2	0.25	1	0.08	0.14	0.173913	0.183673	0.130435	0.347826	0.45	0.0684932	0.321429	0.32	0.190476	0.0571429	0.388889	0.178571	0.227273	0.291667	0.103448	0.0416667	0.0576923	0.28	0.25	0.04	0.149254
HNSC_M541	0.315789	0.421053	0.348837	0.0930233	0.025	0.0444444	0.265625	0.306122	1	0.0869565	0.206349	0.210526	0.222222	0.25	0.416667	0.4375	0.116667	0.42	0.202899	0.157895	0.0728477	0.222222	0.25	0.243243	0.257143	0.0851064	0.0853659	0.0724638	0.275	0.35	0.0714286	0.2
KIRP_M318	0.2	0.454545	0.241379	0.190476	0	0.04	0.227273	0.5	0.210526	0.217391	0.227273	1	0.222222	0.277778	0.352941	0.27027	0.056338	0.324324	0.25	0.157895	0.121212	0.466667	0.217391	0.173913	0.272727	0.115385	0.0806452	0.0793651	0.380952	0.258065	0.037037	0.138462
LUAD_M1408	0.388889	0.588235	0.380952	0.119048	0.0232558	0.0359281	0.324324	0.454545	0.416667	0.162791	0.245902	0.352941	0.283333	0.341463	1	0.5	0.102273	0.577778	0.238095	0.157895	0.0728477	0.294118	0.25	0.210526	0.388889	0.133333	0.0853659	0.0588235	0.378378	0.326087	0.0465116	0.246753
LUAD_M1696	0.272727	0.333333	0.333333	0.0512821	0	0.04	0.409091	0.36	0.347826	0.103448	0.16	0.333333	0.18	0.227273	1	0.666667	0.0683761	0.461538	0.259259	0.130435	0.0555556	0.444444	0.175439	0.166667	0.52381	0.178571	0.0625	0.0566038	0.375	0.194444	0.0384615	0.147059
LUAD_M1697	0.2	0.407407	0.166667	0.192308	0.037037	0.0333333	0.191489	0.230769	0.32	0.133333	0.132075	0.2	0.150943	0.392857	1	0.261905	0.0825688	0.27907	0.155172	0.12	0.0526316	0.09375	0.307692	0.222222	0.217391	0.037037	0.057971	0.0769231	0.166667	0.225806	0.0357143	0.15
LUAD_M788	0.4	0.434783	0.296296	0.0925926	0.0378788	0.0335196	0.244898	0.357143	0.37931	0.127273	0.222222	0.26087	0.236111	0.367347	1	0.557692	0.131783	0.596154	0.185185	0.12	0.0674847	0.217391	0.347826	0.196078	0.291667	0.105263	0.122222	0.0515464	0.285714	0.303571	0.0363636	0.270588
LUSC_M102	0.383562	0.410256	0.311111	0.116279	0.0413223	0.0357143	0.237288	0.382979	0.4375	0.108696	0.222222	0.27027	0.21875	0.4	0.557692	1	0.134454	0.6	0.2	0.153846	0.0653595	0.25	0.378378	0.25	0.25	0.106383	0.125	0.0754717	0.333333	0.341463	0.0545455	0.25974
LUSC_M426	0.238095	0.259259	0.357143	0.0344828	0	0.0434783	0.380952	0.294118	0.45	0.0833333	0.12	0.238095	0.14	0.25	0.666667	1	0.0659341	0.5	0.230769	0.142857	0.0588235	0.411765	0.160714	0.238095	0.428571	0.148148	0.038961	0.0588235	0.409091	0.214286	0.0416667	0.151515
OV_M530	0.373333	0.540541	0.326087	0.111111	0.0322581	0.0352941	0.3	0.425532	0.42	0.152174	0.253968	0.324324	0.25	0.318182	0.596154	0.6	0.122951	1	0.222222	0.146341	0.0714286	0.27027	0.394737	0.209302	0.358974	0.125	0.135802	0.0568182	0.384615	0.333333	0.0434783	0.269231
OV_M917	0.257143	0.4	0.352941	0.0606061	0.0272727	0.0322581	0.321429	0.37931	0.333333	0.0857143	0.207547	0.259259	0.181818	0.228571	0.461538	0.540541	0.079646	1	0.212121	0.230769	0.0731707	0.333333	0.357143	0.214286	0.407407	0.147059	0.084507	0.0508475	0.444444	0.354839	0.0645161	0.217391
READ_M1115	0.157895	0.3125	0.307692	0.0454545	0	0.0526316	0.25	0.333333	0.388889	0.130435	0.155556	0.466667	0.204545	0.235294	0.444444	0.411765	0.0449438	0.333333	0.333333	0.176471	0.0606061	1	0.130435	0.222222	0.368421	0.173913	0.0769231	0.047619	0.421053	0.25	0.0434783	0.142857
STAD_M730	0.272727	0.384615	0.290323	0.0606061	0	0.03125	0.55	0.36	0.291667	0.142857	0.115385	0.272727	0.204082	0.35	0.52381	0.428571	0.059322	0.407407	0.307692	0.09375	0.0789474	0.368421	0.135593	0.166667	1	0.137931	0.0625	0.0512821	0.434783	0.162162	0.0344828	0.147059
UCEC_M135	0.202899	0.423077	0.322581	0.111111	0	0.0384615	0.28	0.382353	0.28	0.178571	0.18	0.380952	0.22449	0.272727	0.378378	0.409091	0.0555556	0.444444	0.25	0.227273	0.08	0.421053	0.178571	0.208333	0.434783	0.133333	0.0606061	0.0555556	1	0.275862	0.0333333	0.19697
BLCA_M120	1	0.522727	0.271523	0.151515	0	0.0865385	0.325581	0.178295	0.450704	0.0894309	0.166667	0.280374	0.111111	0.503401	0.346457	0.36	0.205882	0.424837	0.225225	0.0462963	0.0285714	0.333333	0.220588	0.370968	0.460317	0.0943396	0.0283019	0.0662252	0.207792	0.245283	0.188406	0.144144
BRCA_M131	0.522727	1	0.33557	0.17037	0.0175439	0.0810811	0.401575	0.234783	0.470149	0.0846154	0.206897	0.170732	0.131148	0.540541	0.401575	0.37013	0.181818	0.315789	0.254386	0.0434783	0.0415094	0.241135	0.290323	0.386243	0.414815	0.0789474	0.0274262	0.083871	0.221519	0.227545	0.187793	0.135593
ESCA_M85	0.325581	0.401575	0.387097	0.167832	0.026616	0.125	1	0.166667	0.357724	0.0882353	0.134021	0.159091	0.149351	0.384615	0.243697	0.31068	0.176471	0.351648	0.162162	0.0588235	0.0412371	0.293333	0.354167	0.333333	0.471264	0.0941176	0.0273973	0.0866142	0.189781	0.174497	0.169014	0.141304
HNSC_M116	0.450704	0.458904	0.36	0.151515	0.0168067	0.0683761	0.335766	0.235294	1	0.0814815	0.198347	0.151261	0.15847	0.522876	0.464	0.5	0.205357	0.292135	0.286957	0.039823	0.0381679	0.304348	0.32	0.315271	0.410072	0.103448	0.0254777	0.0613497	0.192771	0.25	0.168605	0.141667
HNSC_M565	0.376812	0.470149	0.392593	0.16	0.0194175	0.0792079	0.357724	0.259615	1	0.092437	0.205607	0.174757	0.166667	0.486301	0.452174	0.456	0.20202	0.260504	0.306931	0.0409836	0.0434783	0.233083	0.354545	0.293814	0.343284	0.0769231	0.0283688	0.0680272	0.213333	0.24359	0.163522	0.12844
LIHC_M246	0.312	0.379032	0.317073	0.186275	0.025974	0.0921053	0.247788	0.3125	0.454545	0.106383	0.256098	0.163043	0.135922	1	0.46875	0.431193	0.24	0.291667	0.376623	0.0641026	0.0444444	0.314286	0.428571	0.222826	0.294118	0.0695652	0.0347826	0.0843373	0.19084	0.263158	0.165289	0.144578
LIHC_M29	0.503401	0.540541	0.343558	0.179348	0.025641	0.0852713	0.384615	0.218045	0.522876	0.0878378	0.176471	0.188406	0.146465	1	0.375	0.4	0.171875	0.331522	0.244275	0.0394737	0.0385965	0.27451	0.323529	0.402985	0.397351	0.0833333	0.0283976	0.0804598	0.217143	0.271186	0.186813	0.132353
LUAD_M332	0.305085	0.352941	0.256198	0.19403	0.0142857	0.0967742	0.230769	0.30137	0.383333	0.119048	0.309859	0.154762	0.103093	0.44186	1	0.474747	0.257576	0.373494	0.371429	0.0581395	0.0504587	0.292929	0.265823	0.182692	0.285714	0.0865385	0.0380952	0.0958904	0.15873	0.17037	0.120301	0.148649
LUAD_M856	0.262295	0.307692	0.263158	0.220339	0.016129	0.111111	0.257143	0.26087	0.327731	0.116883	0.307692	0.149254	0.11236	0.414634	1	0.42268	0.25	0.341772	0.333333	0.0641026	0.0555556	0.237113	0.295775	0.185567	0.236364	0.09375	0.0412371	0.107692	0.140496	0.171875	0.110236	0.129032
LUAD_M86	0.346457	0.401575	0.290076	0.185185	0.019802	0.0759494	0.243697	0.349398	0.464	0.11	0.264368	0.151515	0.117117	0.46875	1	0.567308	0.219512	0.393617	0.329412	0.0485437	0.0520833	0.294643	0.25	0.198529	0.267717	0.0813953	0.0327869	0.0804598	0.164286	0.19863	0.138462	0.172414
LUSC_M1036	0.300699	0.368794	0.268966	0.191667	0.0535714	0.0526316	0.244275	0.295918	0.456	0.0956522	0.22549	0.135922	0.120968	0.431193	0.567308	1	0.197917	0.327273	0.28	0.0423729	0.0461538	0.259843	0.281553	0.1875	0.275362	0.0693069	0.0306122	0.0686275	0.155844	0.1875	0.138365	0.135922
LUSC_M404	0.36	0.37013	0.254658	0.166667	0.0461538	0.0551181	0.222973	0.25	0.5	0.0827068	0.201681	0.139535	0.105634	0.403226	0.508333	1	0.176991	0.373494	0.247863	0.0367647	0.0410448	0.29927	0.239669	0.210046	0.302013	0.0769231	0.0258621	0.0583333	0.152941	0.181818	0.137143	0.144068
OV_M490	0.424837	0.315789	0.173913	0.122222	0.0263158	0.0460526	0.313433	0.152174	0.292135	0.0821918	0.121429	0.257812	0.0621118	0.331522	0.317568	0.373494	0.130769	1	0.151079	0.0264901	0.0316901	0.288591	0.171053	0.268182	0.3	0.0687023	0.0243902	0.0511364	0.117021	0.14433	0.145773	0.11194
SARC_M1156	0.267857	0.267241	0.301887	0.178571	0.0377358	0.113208	0.366667	0.208955	0.346535	0.115385	0.19697	0.163934	0.148148	0.428571	0.295775	0.316456	0.254545	0.190476	0.261538	0.084507	0.0606061	0.375	1	0.157895	0.276316	0.0508475	0.0377358	0.1	0.168142	0.16129	0.135922	0.163636
SARC_M403	0.235294	0.290323	0.336283	0.144928	0.030303	0.107692	0.354167	0.205128	0.354545	0.0941176	0.164557	0.150685	0.152174	0.413793	0.26506	0.3	0.223881	0.189474	0.233766	0.0714286	0.0506329	0.316667	1	0.188525	0.294118	0.056338	0.030303	0.0821918	0.150794	0.189394	0.130435	0.149254
SKCM_M29	0.370968	0.386243	0.228155	0.146119	0.0201729	0.0674847	0.333333	0.139535	0.315271	0.0714286	0.108571	0.151163	0.110638	0.402985	0.189744	0.210046	0.108571	0.268182	0.145349	0.0366492	0.0248447	0.198953	0.201835	1	0.353591	0.0662651	0.0220884	0.0673077	0.170616	0.161435	0.225071	0.0877193
STAD_M258	0.227642	0.274194	0.282051	0.136842	0	0.166667	0.471264	0.159574	0.278261	0.109756	0.111111	0.15493	0.11828	0.262411	0.231884	0.241379	0.176471	0.308824	0.2	0.0447761	0.0410959	0.241935	0.294118	0.247059	1	0.0895522	0.03125	0.0727273	0.144	0.139706	0.153153	0.105263
STAD_M26	0.460317	0.414815	0.246575	0.146341	0	0.107527	0.376068	0.193277	0.410072	0.0973451	0.182692	0.209524	0.117647	0.397351	0.285714	0.302013	0.189474	0.3	0.2	0.0367647	0.0362319	0.338983	0.243478	0.353591	1	0.0927835	0.03125	0.0785714	0.197279	0.212903	0.193333	0.105769
BLCA_M226	1	0.433333	0.346154	0.166667	0.233333	0.0606061	0.428571	0.212121	0.37931	0.084507	0.0465116	0.114286	0.393939	0.106383	0.382353	0.390244	0.516129	0.307692	0.142857	0.0416667	0.05	0.172414	0.457143	0.297872	0.580645	0.0606061	0.0322581	0.0465116	0.133333	0.4375	0.0422535	0.222222
BLCA_M871	1	0.375	0.388889	0.190476	0.285714	0.0416667	0.45	0.2	0.304348	0.08	0.0606061	0.0454545	0.384615	0.0930233	0.275862	0.27027	0.48	0.333333	0.0985915	0.0526316	0.03125	0.0869565	0.380952	0.243902	0.392857	0.0588235	0.0384615	0.0606061	0.0789474	0.333333	0.0491803	0.214286
BRCA_M874	0.433333	1	0.428571	0.2	0.230769	0.0344828	0.307692	0.206897	0.346154	0.0714286	0.0526316	0.133333	0.413793	0.0879121	0.4	0.238095	0.448276	0.269231	0.136986	0.0465116	0.0571429	0.208333	0.4375	0.272727	0.571429	0.0344828	0.027027	0.0526316	0.0697674	0.366667	0.0454545	0.181818
CESC_M488	0.388889	0.428571	1	0.222222	0.333333	0.047619	0.444444	0.227273	0.421053	0.0909091	0.103448	0.0833333	0.434783	0.0581395	0.36	0.222222	0.36	0.235294	0.119403	0.0571429	0.0434783	0.3125	0.368421	0.2	0.44	0.047619	0.0357143	0.0666667	0.0357143	0.434783	0.0517241	0.24
ESCA_M1231	0.45	0.307692	0.444444	0.130435	0.333333	0.0416667	1	0.24	0.24	0.0769231	0.0909091	0.0444444	0.275862	0.0674157	0.1875	0.297297	0.357143	0.26087	0.0972222	0.0512821	0.0381679	0.25	0.304348	0.238095	0.37931	0.0571429	0.03125	0.0588235	0.0526316	0.275862	0.0483871	0.129032
ESCA_M1773	0.25	0.25	0.157895	0.1	0.0434783	0	1	0.125	0.421053	0.047619	0.037037	0.130435	0.222222	0.0869565	0.36	0.157895	0.315789	0.3125	0.056338	0.0384615	0.0740741	0.0681818	0.225806	0.142857	0.285714	0.030303	0	0.0227273	0.0740741	0.294118	0.0384615	0.148148
ESCA_M436	0.428571	0.27451	0.23913	0.0961538	0.156863	0.0363636	1	0.169811	0.291667	0.0854271	0.046875	0.0701754	0.259259	0.0769231	0.301887	0.316667	0.326923	0.233766	0.111111	0.0458716	0.05	0.12	0.280702	0.257576	0.365385	0.030303	0.0350877	0.0307692	0.109756	0.308824	0.0322581	0.157895
HNSC_M410	0.37931	0.346154	0.421053	0.173913	0.26087	0.0384615	0.421053	0.230769	1	0.0740741	0.0571429	0.107143	0.310345	0.0714286	0.5	0.289474	0.444444	0.3	0.126761	0.05	0.0315789	0.181818	0.34375	0.232558	0.366667	0.025641	0.0344828	0.0571429	0.0701754	0.407407	0.047619	0.16129
LGG_M415	0.393939	0.413793	0.434783	0.178571	0.25	0.03125	0.275862	0.117647	0.310345	0.0606061	0.075	0.0882353	1	0.0851064	0.323529	0.25	0.40625	0.185185	0.131579	0.0434783	0.029703	0.142857	0.441176	0.18	0.46875	0.03125	0.0333333	0.0487805	0.046875	0.375	0.0434783	0.2
LUAD_M74	0.382353	0.4	0.36	0.172414	0.16129	0.03125	0.36	0.21875	0.5	0.0681818	0.047619	0.117647	0.323529	0.0618557	1	0.4	0.352941	0.269231	0.144737	0.0857143	0.117647	0.137931	0.428571	0.276596	0.371429	0.03125	0.0327869	0.047619	0.114754	0.451613	0.057971	0.194444
LUSC_M520	0.390244	0.238095	0.222222	0.0731707	0.243243	0.0238095	0.316667	0.25641	0.289474	0.0886076	0.0588235	0.0434783	0.25	0.0660377	0.4	1	0.272727	0.27027	0.102273	0.0408163	0.0434783	0.131579	0.304348	0.25	0.414634	0.0377358	0.028169	0.0384615	0.164179	0.333333	0.0375	0.12766
MESO_M135	0.516129	0.448276	0.36	0.172414	0.2	0.030303	0.357143	0.258065	0.444444	0.0625	0.047619	0.117647	0.40625	0.119565	0.352941	0.272727	1	0.321429	0.12987	0.0425532	0.0512821	0.178571	0.351351	0.304348	0.411765	0.0465116	0.0277778	0.047619	0.0793651	0.40625	0.0428571	0.162162
MESO_M686	0.407407	0.375	0.315789	0.190476	0.08	0.0416667	0.315789	0.2	0.363636	0.0634921	0.04	0.16	0.384615	0.105882	0.321429	0.230769	1	0.263158	0.0985915	0.0384615	0.0666667	0.136364	0.322581	0.214286	0.344828	0.0588235	0.037037	0.0416667	0.0925926	0.388889	0.015873	0.133333
SARC_M264	0.457143	0.4375	0.357143	0.151515	0.25	0.0512821	0.280702	0.228571	0.34375	0.0765027	0.0666667	0.105263	0.441176	0.0808081	0.428571	0.304348	0.351351	0.233333	0.151899	0.0392157	0.0465116	0.0862069	1	0.306122	0.529412	0.0555556	0.0307692	0.0434783	0.102041	0.4	0.0405405	0.236842
SARC_M795	0.380952	0.307692	0.368421	0.0833333	0.333333	0.04	0.304348	0.148148	0.24	0.0769231	0.0909091	0.0714286	0.423077	0.0555556	0.266667	0.263158	0.266667	0.122807	0.0972222	0.0512821	0.037037	0.190476	1	0.130435	0.428571	0.04	0.0294118	0.0588235	0.0833333	0.321429	0.0483871	0.206897
STAD_M125	0.580645	0.571429	0.44	0.16129	0.310345	0.015748	0.37931	0.205882	0.366667	0.0714286	0.0697674	0.111111	0.46875	0.09375	0.371429	0.414634	0.411765	0.25	0.141026	0.0408163	0.0487805	0.206897	0.529412	0.24	1	0.0588235	0.0263158	0.0454545	0.0833333	0.46875	0.0416667	0.216216
UCS_M373	0.4375	0.366667	0.434783	0.178571	0.206897	0.03125	0.307692	0.1875	0.407407	0.0714286	0.075	0.121212	0.375	0.0736842	0.451613	0.309524	0.40625	0.28	0.131579	0.0434783	0.0526316	0.185185	0.4	0.229167	0.46875	0.0322581	0.0285714	0.0487805	0.0526316	1	0.0434783	0.235294
UCS_M54	0.367347	0.291667	0.327869	0.102041	0.142857	0.0188679	0.337349	0.204082	0.282609	0.116279	0.0491803	0.0952381	0.3	0.117647	0.346939	0.336842	0.404255	0.295775	0.114583	0.0298507	0.038961	0.152174	0.372549	0.311475	0.36	0.0483871	0.0188679	0.0322581	0.147541	1	0.0338983	0.145455
BLCA_M695	1	0.4375	0.4375	0.0714286	0	0.0588235	0.518519	0.0416667	0.48	0.1	0.0645161	0.136364	0.0689655	0.433333	0.333333	0.222222	0.0606061	0.26087	0.380952	0.0714286	0.2	0.454545	0.517241	0.08	0.4	0.2	0.0714286	0.0606061	0.148148	0.192308	0.0487805	0.115385
BRCA_M1386	0.32	1	0.28125	0.08	0	0.0434783	0.333333	0.0285714	0.333333	0.0434783	0.046875	0.097561	0.0714286	0.428571	0.4	0.162162	0.0416667	0.232558	0.411765	0.0416667	0.25	0.285714	0.344828	0.0535714	0.190476	0.107143	0.0384615	0.04	0.0833333	0.130435	0.0416667	0.0740741
BRCA_M862	0.4375	1	0.5	0.0555556	0.0277778	0.0277778	0.441176	0.0359712	0.551724	0.0833333	0.0512821	0.0943396	0.0740741	0.457143	0.411765	0.238095	0.0487805	0.346939	0.447368	0.0555556	0.25	0.333333	0.529412	0.0877193	0.351351	0.157895	0.0555556	0.0487805	0.114286	0.142857	0.0408163	0.0882353
CESC_M580	0.4375	0.5	1	0.0555556	0.025641	0.047619	0.463415	0.0357143	0.551724	0.0833333	0.0526316	0.115385	0.0545455	0.378378	0.411765	0.268293	0.0487805	0.25	0.341463	0.0555556	0.219512	0.333333	0.485714	0.0689655	0.388889	0.157895	0.0555556	0.0487805	0.114286	0.111111	0.0526316	0.0882353
ESCA_M1247	0.518519	0.441176	0.441176	0.0967742	0	0.0833333	1	0.0405405	0.538462	0.0930233	0.0588235	0.12766	0.0816327	0.4375	0.387097	0.307692	0.0588235	0.326087	0.351351	0.0645161	0.25	0.346154	0.516129	0.0754717	0.439024	0.21875	0.03125	0.0645161	0.133333	0.307692	0.0454545	0.0666667
ESCA_M445	0.405405	0.428571	0.463415	0.0714286	0	0.0869565	1	0.0491803	0.416667	0.0740741	0.0444444	0.103448	0.0731707	0.325581	0.384615	0.319149	0.0444444	0.3125	0.297872	0.047619	0.217391	0.243243	0.414634	0.0625	0.458333	0.177419	0.047619	0.047619	0.097561	0.216216	0.0363636	0.116279
HNSC_M373	0.48	0.551724	0.551724	0.0740741	0.03125	0.0408163	0.538462	0.0425532	1	0.102564	0.0689655	0.113636	0.0652174	0.4	0.444444	0.34375	0.0625	0.314286	0.483871	0.0740741	0.28125	0.47619	0.535714	0.111111	0.464286	0.206897	0.0357143	0.0625	0.153846	0.192308	0.05	0.0769231
LIHC_M1032	0.296296	0.428571	0.30303	0.0384615	0	0.0444444	0.357143	0.0335821	0.307692	0.0666667	0.037037	0.0930233	0.0666667	1	0.37037	0.205882	0.04	0.25	0.375	0.0555556	0.181818	0.26087	0.421053	0.0526316	0.177778	0.222222	0.04	0.037037	0.0666667	0.0740741	0.0384615	0.107143
LIHC_M380	0.433333	0.457143	0.378378	0.0606061	0	0.0377358	0.4375	0.0377358	0.4	0.0652174	0.0555556	0.122449	0.0588235	1	0.363636	0.225	0.0526316	0.340426	0.444444	0.0606061	0.205128	0.321429	0.484848	0.0535714	0.244898	0.205882	0.030303	0.0285714	0.0909091	0.121212	0.0294118	0.0833333
LUAD_M467	0.333333	0.411765	0.411765	0.0625	0	0.0384615	0.387097	0.047619	0.444444	0.0697674	0.0425532	0.130435	0.0612245	0.37037	1	0.243243	0.0333333	0.25641	0.324324	0.0666667	0.333333	0.307692	0.352941	0.0566038	0.294118	0.151515	0.0322581	0.0571429	0.1	0.0645161	0.03125	0.0909091
LUAD_M974	0.333333	0.290323	0.290323	0.0645161	0	0.0416667	0.296296	0.0294118	0.347826	0.0857143	0.0434783	0.1	0.0731707	0.275862	1	0.210526	0.0454545	0.28125	0.4375	0.0909091	0.333333	0.368421	0.310345	0.0434783	0.285714	0.111111	0.0434783	0.0740741	0.136364	0.0869565	0.0416667	0.0769231
PAAD_M135	0.380952	0.411765	0.275862	0.0714286	0	0.047619	0.28	0.0226415	0.4	0.0606061	0.05	0.138889	0.108108	0.307692	0.4375	0.25	0.047619	0.266667	1	0.105263	0.3125	0.533333	0.4	0.0576923	0.3125	0.08	0.0454545	0.0833333	0.157895	0.157895	0.0625	0.0526316
PAAD_M18	0.342857	0.447368	0.341463	0.0833333	0.0238095	0.0338983	0.351351	0.0535714	0.483871	0.0816327	0.05	0.113208	0.0727273	0.444444	0.324324	0.325	0.047619	0.288462	1	0.0540541	0.214286	0.366667	0.394737	0.0862069	0.275	0.184211	0.0540541	0.047619	0.0810811	0.118644	0.04	0.0857143
READ_M610	0.454545	0.333333	0.333333	0.0909091	0	0.0606061	0.346154	0.047619	0.47619	0.0857143	0.08	0.128205	0.0526316	0.321429	0.368421	0.266667	0.0740741	0.242424	0.533333	0.0909091	0.2	1	0.407407	0.0869565	0.285714	0.2	0.0434783	0.0740741	0.136364	0.136364	0.0571429	0.0952381
SARC_M1081	0.517241	0.529412	0.485714	0.0588235	0.025641	0.0294118	0.516129	0.037037	0.535714	0.0869565	0.0540541	0.142857	0.0980392	0.484848	0.352941	0.255814	0.0512821	0.394737	0.4	0.0588235	0.241379	0.407407	1	0.0909091	0.319149	0.166667	0.0285714	0.0512821	0.121212	0.151515	0.0425532	0.0606061
SARC_M1511	0.304348	0.315789	0.1875	0.05	0.0243902	0.0454545	0.222222	0.05	0.208333	0	0.0512821	0.0769231	0.0952381	0.421053	0.263158	0.3125	0.05	0.219512	0.4	0.047619	0.172414	0.333333	1	0.0416667	0.116279	0.12	0.047619	0.0333333	0.08	0.0454545	0.0434783	0.0833333
STAD_M341	0.4	0.351351	0.388889	0.0625	0	0.0526316	0.40625	0.0384615	0.464286	0.0909091	0.0588235	0.08	0.0588235	0.236842	0.294118	0.2	0.0540541	0.243902	0.275	0.0625	0.179487	0.285714	0.297297	0.0625	1	0.111111	0.030303	0.0540541	0.129032	0.166667	0.0444444	0.0645161
STAD_M50	0.365854	0.333333	0.361702	0.166667	0	0.08	0.458333	0.0347222	0.375	0.0689655	0.0416667	0.0701754	0.0588235	0.244898	0.322034	0.269231	0.0408163	0.252427	0.25	0.0434783	0.153846	0.219512	0.319149	0.0512821	1	0.241935	0.0217391	0.0392157	0.0888889	0.229508	0.0338983	0.106383
BRCA_M98	0.0869565	1	0.692308	0.466667	0	0.0666667	0.0727273	0.588235	0.642857	0.714286	0.0645161	0.178571	0.37931	0.466667	0.666667	0.0648148	0.263158	0.47619	0.230769	0.0367647	0.0434783	0.785714	0.466667	0.277778	0	0.5	0.0392157	0.0909091	0.125	0.458333	0.0909091	0.0485437
CESC_M204	0.0952381	0.692308	1	0.538462	0	0.0697674	0.0961538	0.666667	0.615385	0.692308	0.0689655	0.192308	0.310345	0.428571	0.769231	0.0761905	0.294118	0.45	0.25	0.0373134	0.047619	0.642857	0.428571	0.4	0	0.473684	0.0408163	0.1	0.136364	0.434783	0.0952381	0.049505
CHOL_M1450	0.0952381	0.466667	0.538462	1	0.047619	0.0697674	0.0961538	0.388889	0.3125	0.571429	0.0526316	0.192308	0.1875	0.25	0.4375	0.0526316	0.375	0.26087	0.111111	0.0145985	0.1	0.352941	0.176471	0.4	0.047619	0.272727	0.0434783	0.1	0.05	0.32	0.04	0.04
GBM_M86	0.0882353	0.588235	0.666667	0.388889	0.047619	0.0851064	0.107143	1	0.625	0.6875	0.0588235	0.25	0.34375	0.470588	0.75	0.0727273	0.285714	0.545455	0.206897	0.0434783	0.0384615	0.647059	0.470588	0.368421	0	0.5	0.0566038	0.08	0.111111	0.461538	0.0851064	0.0689655
HNSC_M145	0.0606061	0.642857	0.615385	0.3125	0	0.0930233	0.0740741	0.625	1	0.642857	0.0666667	0.238095	0.344828	0.5	0.714286	0.0654206	0.210526	0.5	0.192308	0.047619	0.0186047	0.714286	0.615385	0.294118	0.0133929	0.526316	0.0612245	0.0645161	0.130435	0.416667	0.0930233	0.0490196
KICH_M176	0.0923077	0.714286	0.692308	0.571429	0	0.0909091	0.113208	0.6875	0.642857	1	0.0645161	0.285714	0.333333	0.571429	0.785714	0.0648148	0.411765	0.47619	0.185185	0.0291971	0.0909091	0.666667	0.466667	0.4375	0.0133333	0.5	0.06	0.0909091	0.125	0.521739	0.0666667	0.0384615
KICH_M20	0.233333	0.416667	0.391304	0.333333	0.28	0.0740741	0.0952381	0.423077	0.375	1	0.0487805	0.387097	0.25	0.333333	0.458333	0.222222	0.259259	0.322581	0.296296	0.131579	0.0625	0.4	0.28	0.269231	0.017094	0.481481	0.05	0.09375	0.32	0.363636	0.16	0.09375
LGG_M104	0.0609756	0.37931	0.310345	0.1875	0	0.0666667	0.0714286	0.34375	0.344828	0.333333	0.0588235	0.139535	1	0.266667	0.366667	0.0564516	0.142857	0.305556	0.170732	0.0466667	0.0285714	0.413793	0.266667	0.181818	0	0.314286	0.0615385	0.0526316	0.075	0.307692	0.0666667	0.0420168
LIHC_M205	0.0952381	0.466667	0.428571	0.25	0	0.05	0.0555556	0.470588	0.5	0.571429	0.0689655	0.192308	0.266667	1	0.533333	0.05	0.157895	0.380952	0.2	0.0296296	0.0186916	0.533333	0.428571	0.235294	0	0.4	0.0258065	0.1	0.136364	0.32	0.0697674	0.0392157
LUAD_M164	0.0909091	0.666667	0.769231	0.4375	0	0.0888889	0.111111	0.75	0.714286	0.785714	0.0625	0.272727	0.366667	0.533333	1	0.0740741	0.315789	0.52381	0.222222	0.0364964	0.047619	0.733333	0.533333	0.411765	0.0132743	0.55	0.0588235	0.0869565	0.12	0.5	0.0888889	0.0480769
MESO_M42	0.0923077	0.263158	0.294118	0.375	0	0.0909091	0.113208	0.285714	0.210526	0.411765	0.0512821	0.173913	0.142857	0.157895	0.315789	0.0333333	1	0.192308	0.0625	0.0344828	0.0909091	0.25	0.1	0.352941	0.0133333	0.2	0.06	0.0909091	0	0.25	0.037037	0.0294118
OV_M33	0.0684932	0.47619	0.45	0.26087	0.0357143	0.0784314	0.0819672	0.545455	0.5	0.47619	0.1	0.176471	0.305556	0.380952	0.52381	0.111111	0.192308	1	0.181818	0.0422535	0.0227273	0.52381	0.380952	0.25	0	0.423077	0.0526316	0.0689655	0.0967742	0.354839	0.0784314	0.0454545
READ_M43	0.0833333	0.785714	0.642857	0.352941	0	0.0888889	0.0909091	0.647059	0.714286	0.666667	0.0625	0.217391	0.413793	0.533333	0.733333	0.0642202	0.25	0.52381	0.222222	0.0364964	0.0184332	1	0.533333	0.333333	0.0132743	0.55	0.0588235	0.0869565	0.12	0.44	0.0888889	0.0480769
SARC_M114	0.05	0.466667	0.428571	0.176471	0.0454545	0.0454545	0.0714286	0.470588	0.615385	0.466667	0.0689655	0.148148	0.266667	0.428571	0.533333	0.0560748	0.1	0.380952	0.2	0.0373134	0.0186916	0.533333	1	0.166667	0.0135135	0.4	0.0408163	0.05	0.136364	0.32	0.0952381	0.049505
SKCM_M276	0.09375	0.277778	0.4	0.4	0	0.0930233	0.115385	0.368421	0.294118	0.4375	0.0526316	0.185185	0.181818	0.235294	0.411765	0.047619	0.352941	0.25	0.0689655	0	0.0454545	0.333333	0.166667	1	0.0133929	0.26087	0.0612245	0.0952381	0	0.259259	0.08	0.0218579
TGCT_M941	0.1	0.5	0.473684	0.272727	0.12	0.08	0.0833333	0.5	0.526316	0.5	0.0540541	0.3	0.314286	0.4	0.55	0.115385	0.2	0.423077	0.266667	0.114286	0.018018	0.55	0.4	0.26087	0.03125	1	0.0535714	0.111111	0.115385	0.366667	0.125	0.107143
UCS_M164	0.0789474	0.458333	0.434783	0.32	0.030303	0.0727273	0.09375	0.461538	0.416667	0.521739	0.0612245	0.189189	0.307692	0.32	0.5	0.0769231	0.25	0.354839	0.162162	0.0340136	0.0606061	0.44	0.32	0.259259	0.0127119	0.366667	0.0491803	0.0606061	0.0857143	1	0.0727273	0.0438596
BLCA_M119	1	0.375	0.598039	0.180723	0.427536	0.0759494	0.525862	0.37931	0.56044	0.0888889	0.125984	0.330189	0.0545455	0.415094	0.313953	0.425532	0.27551	0.313953	0.201835	0.364706	0.244186	0.347826	0.241758	0.266129	0.2	0.113924	0.0487805	0.105263	0.115385	0.403361	0.0819672	0.236364
BLCA_M477	1	0.491803	0.484536	0.144928	0.348485	0.1	0.436364	0.442857	0.413793	0.0821918	0.137615	0.207921	0.0543478	0.323232	0.328947	0.409836	0.247059	0.236364	0.2	0.293333	0.294118	0.329114	0.242424	0.2	0.25	0.131148	0.0634921	0.0729167	0.125	0.321429	0.0985915	0.158416
BRCA_M500	0.491803	1	0.351064	0.127273	0.248062	0.139535	0.347826	0.3125	0.3	0.0689655	0.0610687	0.169014	0.0425532	0.23913	0.333333	0.352941	0.183099	0.214286	0.196078	0.25	0.267857	0.275362	0.3	0.152381	0.21875	0.109091	0.028169	0.0441989	0.145833	0.269231	0.12963	0.121951
CESC_M10	0.598039	0.358824	1	0.161616	0.496503	0.0736842	0.539683	0.317308	0.528846	0.0747664	0.111111	0.319277	0.0472441	0.452174	0.292453	0.424528	0.256637	0.326531	0.193548	0.317073	0.203883	0.330189	0.203704	0.26087	0.159292	0.117647	0.040404	0.0978261	0.130435	0.4375	0.0875912	0.208861
COAD_M171	0.427536	0.325	0.496503	0.120301	1	0.0434783	0.461538	0.248175	0.408759	0.0492958	0.0960452	0.240196	0.0372671	0.296774	0.276119	0.360294	0.17931	0.233083	0.144654	0.227941	0.19697	0.286765	0.138889	0.195402	0.156398	0.0962963	0.0247934	0.0823529	0.078125	0.297619	0.0764706	0.159794
COAD_M19	0.289593	0.242958	0.342222	0.0734266	1	0.0406504	0.476987	0.161435	0.271493	0.0304348	0.0681818	0.231047	0.0240964	0.24569	0.193548	0.235294	0.168142	0.312253	0.106557	0.264957	0.133641	0.209402	0.115044	0.15942	0.110368	0.0925926	0.020979	0.0612245	0.0976744	0.24898	0.0503876	0.113879
ESCA_M174	0.525862	0.31016	0.539683	0.141593	0.461538	0.0642202	1	0.268908	0.418033	0.057377	0.115385	0.245989	0.05	0.371212	0.279661	0.410256	0.228346	0.241379	0.173913	0.235294	0.169492	0.270492	0.180328	0.205128	0.160622	0.103448	0.0353982	0.0847458	0.102804	0.356164	0.0666667	0.19186
ESCA_M21	0.417219	0.276018	0.45283	0.106667	0.476987	0.0571429	1	0.220779	0.346154	0.0440252	0.0989583	0.255814	0.039548	0.329268	0.236842	0.320261	0.229299	0.324873	0.14218	0.264045	0.151316	0.207547	0.167742	0.185714	0.139738	0.1	0.0266667	0.0772059	0.107383	0.335227	0.0582011	0.157895
GBM_M477	0.442857	0.3125	0.317308	0.16129	0.282353	0.0727273	0.358491	1	0.348837	0.0746269	0.103774	0.210526	0.0588235	0.319149	0.322581	0.35	0.189873	0.22	0.20339	0.285714	0.191176	0.342466	0.229508	0.18018	0.189189	0.148148	0.0714286	0.0585106	0.0833333	0.27027	0.109375	0.133929
HNSC_M92	0.56044	0.304348	0.528846	0.189873	0.408759	0.0761905	0.418033	0.348837	1	0.0930233	0.0961538	0.356436	0.046729	0.403846	0.274725	0.529412	0.26087	0.329268	0.177215	0.349398	0.223684	0.363636	0.197531	0.275	0.186667	0.105263	0.0512821	0.111111	0.12987	0.314516	0.107143	0.211382
LIHC_M53	0.415094	0.260116	0.452174	0.159091	0.296774	0.0722892	0.371212	0.319149	0.403846	0.0736842	0.122137	0.283186	0.0526316	1	0.203883	0.38	0.24	0.3	0.153846	0.304348	0.231707	0.319588	0.193878	0.238462	0.168675	0.108434	0.0465116	0.1	0.0963855	0.357143	0.0860215	0.202703
LUAD_M113	0.328947	0.272727	0.292453	0.0909091	0.276119	0.0925926	0.279661	0.287671	0.274725	0.0588235	0.0833333	0.148148	0.0363636	0.203883	1	0.490566	0.207317	0.196078	0.166667	0.205479	0.109589	0.225	0.209677	0.0992908	0.222222	0.20339	0.0291262	0.0344828	0.0833333	0.175	0.0757576	0.0925926
LUAD_M415	0.328358	0.333333	0.262626	0.0909091	0.223077	0.119048	0.333333	0.322581	0.324324	0.0526316	0.0714286	0.136364	0.0465116	0.178947	1	0.425532	0.2	0.25641	0.192308	0.1875	0.131148	0.2	0.26	0.0980392	0.266667	0.229167	0.0333333	0.0261438	0.0888889	0.194444	0.0925926	0.119048
LUSC_M191	0.425532	0.278481	0.424528	0.131579	0.360294	0.0735294	0.410256	0.35	0.529412	0.0617284	0.119658	0.277228	0.04	0.38	0.367089	1	0.241379	0.294872	0.178218	0.3	0.17284	0.365854	0.219178	0.228814	0.191176	0.101449	0.0571429	0.107692	0.0821918	0.291667	0.103896	0.175
LUSC_M680	0.409836	0.352941	0.32	0.117647	0.253333	0.128205	0.390244	0.338983	0.333333	0.0754717	0.0967742	0.205128	0.047619	0.238636	0.490566	1	0.217391	0.243243	0.168831	0.190476	0.2	0.276923	0.304348	0.115385	0.237288	0.12	0.0238095	0.0465116	0.08	0.2	0.0930233	0.135135
UCS_M10	0.403361	0.259615	0.4375	0.133333	0.297619	0.06	0.356164	0.27027	0.314516	0.0530973	0.0860927	0.218579	0.0458015	0.357143	0.194444	0.291667	0.226087	0.229358	0.160305	0.24812	0.18	0.26087	0.196078	0.210884	0.134454	0.0727273	0.038835	0.0884956	0.102041	1	0.0699301	0.174699
BLCA_M225	1	0.232558	0.370968	0.0769231	0	0.037037	0.333333	0.0689655	0.403509	0.0574713	0.0689655	0.107143	0.0363636	0.333333	0.358974	0.325843	0.28	0.394737	0.14	0.101695	0.0533333	0.254902	0.311475	0.0901639	0.446429	0.0327869	0.0289855	0.037037	0.0588235	0.222222	0.0588235	0.125
BLCA_M869	1	0.277778	0.418182	0.0888889	0	0.0425532	0.361446	0.0416667	0.46	0.0625	0.0784314	0.114286	0.0416667	0.390244	0.394366	0.353659	0.325581	0.434783	0.162791	0.115385	0.0588235	0.295455	0.351852	0.0956522	0.510204	0.0363636	0.0322581	0.0425532	0.0655738	0.255319	0.0681818	0.146341
CESC_M78	0.418182	0.238095	1	0.104478	0.0363636	0.0322581	0.367816	0.06	0.717391	0.0581395	0.0701754	0.0884956	0.0285714	0.4	0.478873	0.4625	0.26	0.438356	0.12	0.103448	0.0461538	0.3125	0.385965	0.0819672	0.538462	0.0327869	0.0212766	0.0377358	0.0597015	0.226415	0.06	0.12766
ESCA_M62	0.361446	0.12987	0.367816	0.09	0.0909091	0.025641	1	0.0566038	0.357143	0.0421053	0.0614035	0.104651	0.045977	0.225	0.489362	0.55102	0.152941	0.573034	0.115385	0.0645161	0.0813953	0.180723	0.252747	0.0636943	0.402439	0.0394737	0.047619	0.0238095	0.049505	0.190476	0.0352941	0.147368
HNSC_M161	0.46	0.27027	0.717391	0.0869565	0	0.021978	0.357143	0.0434783	1	0.0617284	0.0769231	0.0825688	0.0246914	0.45	0.428571	0.44898	0.288889	0.428571	0.236842	0.113208	0.0428571	0.348837	0.45098	0.0854701	0.5625	0.0357143	0.0350877	0.0416667	0.0645161	0.25	0.0666667	0.142857
LIHC_M373	0.390244	0.347826	0.4	0.0816327	0	0.0487805	0.235294	0.0285714	0.45	0.0735294	0.107143	0.103448	0.03125	1	0.307692	0.309524	0.3125	0.292308	0.24	0.162162	0.0363636	0.4	0.26087	0.0776699	0.404762	0.05	0.0487805	0.0625	0.0363636	0.189189	0.103448	0.152174
LUAD_M100	0.394366	0.15873	0.478873	0.144578	0.0555556	0.027027	0.489362	0.05	0.428571	0.046729	0.0594059	0.0827068	0.0348837	0.292308	1	0.604651	0.2	0.615385	0.140625	0.0759494	0.0421053	0.217391	0.25	0.0699301	0.442857	0.035461	0.0240964	0.027027	0.0574713	0.194444	0.0422535	0.144578
LUAD_M389	0.375	0.333333	0.411765	0.0508475	0.0416667	0.0487805	0.307692	0.0851064	0.367347	0.0533333	0.0888889	0.0789474	0.047619	0.307692	1	0.488372	0.214286	0.309859	0.212121	0.0833333	0.0645161	0.243902	0.264151	0.0533333	0.446809	0.0462963	0.0357143	0.0487805	0.0727273	0.232558	0.0789474	0.0689655
LUSC_M108	0.353659	0.133333	0.4625	0.126316	0.0490196	0.0232558	0.55102	0.0434783	0.417722	0.0420168	0.0625	0.0833333	0.0595238	0.246753	0.604651	1	0.156627	0.623529	0.118421	0.0659341	0.0465116	0.185185	0.272727	0.0645161	0.467532	0.04	0.0265487	0.0241935	0.0505051	0.209877	0.0361446	0.138298
LUSC_M447	0.346154	0.257143	0.407407	0.0444444	0.0212766	0.0444444	0.37037	0.0784314	0.44898	0.0681818	0.0985915	0.0714286	0.0666667	0.309524	0.488372	1	0.195652	0.405797	0.189189	0.0980392	0.0606061	0.222222	0.339623	0.0598291	0.531915	0.0540541	0.037037	0.0444444	0.0862069	0.266667	0.0714286	0.0819672
OV_M1514	0.225	0.277778	0.2	0.0588235	0	0.0434783	0.36	0.0967742	0.190476	0.0555556	0.0961538	0.0909091	0.08	0.0967742	0.30303	0.342857	0.142857	1	0.15	0.0869565	0.0652174	0.133333	0.26087	0.0444444	0.434783	0.0549451	0.0434783	0.0192308	0.105263	0.16129	0.0434783	0
OV_M510	0.344828	0.123457	0.366667	0.107843	0.0462963	0.0217391	0.533981	0.0449438	0.340909	0.04	0.059322	0.0728477	0.043956	0.228916	0.531915	0.544554	0.146067	1	0.109756	0.0618557	0.0430108	0.172414	0.242105	0.06875	0.4	0.0384615	0.0337079	0.0230769	0.047619	0.155556	0.0337079	0.13
OV_M854	0.434783	0.15873	0.438356	0.104651	0.0555556	0.027027	0.573034	0.05	0.428571	0.046729	0.07	0.0827068	0.0547945	0.292308	0.615385	0.623529	0.183099	1	0.140625	0.0759494	0.0421053	0.217391	0.298701	0.0774648	0.507463	0.0434783	0.0240964	0.027027	0.0574713	0.194444	0.0422535	0.158537
SARC_M234	0.351852	0.175	0.385965	0.0638298	0.03125	0.021978	0.348837	0.0408163	0.45098	0.0595238	0.0769231	0.0825688	0.0408163	0.26087	0.264151	0.339623	0.26087	0.298701	0.146341	0.0925926	0.0428571	0.234043	1	0.0948276	0.363636	0.0357143	0.0224719	0.0208333	0.047619	0.22449	0.0434783	0.142857
STAD_M364	0.244444	0.363636	0.24	0.0645161	0.02	0.0285714	0.366667	0.108108	0.266667	0.0465116	0.103448	0.107143	0.0625	0.242424	0.428571	0.5	0.171429	0.434783	0.25	0.103448	0.0566038	0.242424	0.23913	0.0496454	1	0.0510204	0.0294118	0.0180723	0.0652174	0.228571	0.0689655	0.04
STAD_M61	0.510204	0.263158	0.538462	0.0851064	0.0165289	0.0344828	0.402439	0.0727273	0.5625	0.0609756	0.0789474	0.101852	0.04	0.404762	0.446809	0.531915	0.282609	0.507463	0.155556	0.111111	0.0422535	0.340909	0.363636	0.0847458	1	0.0431034	0.03125	0.0408163	0.0634921	0.244898	0.0652174	0.147541
BLCA_M235	1	0.518519	0.307692	0.047619	0	0.0625	0.65	0.0526316	0.307692	0.0384615	0.0909091	0.0588235	0.166667	0.0714286	0.459459	0.52381	0.0666667	0.387097	0.173913	0.0357143	0.0588235	0.307692	0.0425532	0.0543478	0.45	0.416667	0.0357143	0.0540541	0.0392157	0.416667	0.0588235	0.0714286
BLCA_M891	1	0.346154	0.333333	0.0555556	0	0.0434783	0.6875	0.105263	0.272727	0.05	0.0714286	0.0714286	0.157895	0.0909091	0.297297	0.444444	0.0833333	0.321429	0.166667	0.0454545	0.0555556	0.333333	0.0238095	0.0340909	0.533333	0.217391	0.0454545	0.047619	0.0333333	0.473684	0.0416667	0.0909091
BRCA_M237	0.518519	1	0.205882	0.030303	0	0.0512821	0.333333	0.0967742	0.322581	0.0714286	0.0487805	0.0886076	0.25	0.0769231	0.452381	0.344828	0.0540541	0.428571	0.133333	0.0285714	0.0595238	0.380952	0.0566038	0.0533333	0.285714	0.366667	0.0294118	0.0555556	0.047619	0.28125	0.0487805	0.0285714
ESCA_M447	0.6875	0.333333	0.32	0.0487805	0	0.0357143	1	0.0833333	0.269231	0.0307692	0.09375	0.0606061	0.125	0.0740741	0.358974	0.409091	0.0689655	0.3125	0.130435	0.037037	0.0519481	0.26087	0.0434783	0.0434783	0.555556	0.269231	0.037037	0.0384615	0.0306122	0.434783	0.0113314	0.0740741
HNSC_M181	0.307692	0.322581	0.188406	0.0357143	0	0.133333	0.269231	0.125	1	0.0857143	0.0714286	0.0689655	0.272727	0.0714286	0.5	0.314286	0.0689655	0.25	0.125	0.0357143	0.0649351	0.342105	0.133333	0.0430108	0.208333	0.222222	0.037037	0.12	0.0571429	0.172414	0.0132743	0.0666667
LUAD_M109	0.459459	0.452381	0.259259	0.0425532	0	0.102041	0.358974	0.0697674	0.384615	0.0545455	0.0638298	0.0879121	0.230769	0.0775862	1	0.368421	0.0408163	0.491228	0.119048	0.0338983	0.0515464	0.42	0.0731707	0.0454545	0.289474	0.317073	0.0217391	0.0666667	0.0384615	0.285714	0.037037	0.0425532
LUAD_M405	0.363636	0.405405	0.207792	0.0526316	0	0.125	0.257143	0.0857143	0.40625	0.0652174	0.0789474	0.097561	0.258065	0.0841121	1	0.264706	0.05	0.407407	0.117647	0.04	0.0568182	0.409091	0.0821918	0.0506329	0.142857	0.222222	0.027027	0.0833333	0.0434783	0.125	0.0444444	0.0470588
LUAD_M936	0.285714	0.307692	0.119403	0.04	0	0.125	0.181818	0.176471	0.5	0.107143	0.0740741	0.08	0.3125	0.0416667	1	0.181818	0.0454545	0.210526	0.111111	0.047619	0.056338	0.277778	0.0701754	0.0384615	0.157895	0.181818	0.05	0.0909091	0.0714286	0.1	0.0357143	0.0416667
LUSC_M511	0.52381	0.344828	0.333333	0.05	0	0.037037	0.409091	0.0869565	0.259259	0.047619	0.0322581	0.0405405	0.181818	0.12	0.368421	1	0.0714286	0.285714	0.190476	0.037037	0.0625	0.289474	0.0444444	0.0447761	0.285714	0.454545	0.04	0.0571429	0.04	0.28	0.0625	0.0769231
OV_M1084	0.358974	0.428571	0.202381	0.0327869	0.0222222	0.0816327	0.238095	0.0697674	0.232558	0.0363636	0.0425532	0.0888889	0.236842	0.0652174	0.46	0.275	0.0413223	1	0.0530973	0.0327869	0.0412371	0.296296	0.0625	0.045977	0.230769	0.325	0.0231214	0.0638298	0.037037	0.292683	0.027027	0.0425532
OV_M1772	0.387097	0.428571	0.162162	0.0392157	0.0217391	0.0277778	0.3125	0.0909091	0.194444	0.0444444	0.0540541	0.060241	0.15625	0.0555556	0.369565	0.28125	0.0512821	1	0.0582524	0.0392157	0.045977	0.258065	0.0545455	0.0294118	0.310345	0.30303	0.0277778	0.0810811	0.0454545	0.387097	0.025641	0.0540541
OV_M588	0.354167	0.384615	0.215054	0.0380952	0.0175439	0.0655738	0.28	0.0571429	0.25	0.0531915	0.0701754	0.0891089	0.18	0.0708661	0.491228	0.285714	0.05	1	0.0943396	0.0333333	0.0462963	0.301587	0.0526316	0.0406504	0.2	0.27451	0.0263158	0.0508475	0.030303	0.25	0.0307692	0.0338983
READ_M404	0.307692	0.380952	0.253165	0.0952381	0	0.0851064	0.190476	0.0731707	0.342105	0.0576923	0.0681818	0.0786517	0.216216	0.0701754	0.42	0.289474	0.0434783	0.301587	0.128205	0.037037	0.0531915	1	0.0759494	0.0470588	0.15	0.219512	0.047619	0.0714286	0.0384615	0.133333	0.0392157	0.0652174
STAD_M214	0.533333	0.285714	0.26087	0.0416667	0	0.0416667	0.555556	0.1	0.208333	0.047619	0.0689655	0.0434783	0.15	0.0869565	0.289474	0.285714	0.08	0.310345	0.1	0.0416667	0.0405405	0.25	0.0606061	0.0434783	1	0.208333	0.0434783	0.0416667	0.025	0.45	0.03125	0.0416667
TGCT_M140	0.416667	0.366667	0.259259	0.047619	0	0.0384615	0.269231	0.038961	0.2	0.0357143	0.027027	0.0533333	0.166667	0.111111	0.317073	0.454545	0.0344828	0.325	0.125	0.0344828	0.0588235	0.186047	0.0652174	0.0434783	0.208333	1	0.0357143	0.0540541	0.0392157	0.259259	0.0588235	0.0714286
UCS_M562	0.473684	0.28125	0.259259	0.047619	0	0.037037	0.434783	0.0384615	0.172414	0.0384615	0.0909091	0.0357143	0.0769231	0.0714286	0.285714	0.28	0.0666667	0.387097	0.08	0.0357143	0.0379747	0.2	0.0526316	0.0430108	0.45	0.259259	0.0357143	0.0344828	0.0208333	1	0.0363636	0.0714286
BLCA_M361	1	0.238095	0	0.25	0.315789	0.08	0.0186335	0.354839	0.588235	0.388889	0.0697674	0.2	0.391304	0.26087	0.588235	0.529412	0.155556	0.230769	0.473684	0.2	0.0218182	0.208333	0.380952	0.375	0	0.217391	0.0221519	0.166667	0.625	0.526316	0.186047	0.217391
BRCA_M403	0.238095	1	0	0.0833333	0.235294	0.0454545	0.0124481	0.25	0.210526	0.235294	0.105263	0.128205	0.166667	0.0869565	0.352941	0.375	0.0909091	0.166667	0.333333	0.16	0.04	0.0869565	0.470588	0.208333	0.0294118	0.115385	0.05	0.0434783	0.294118	0.388889	0.0681818	0.2
COAD_M153	0.315789	0.235294	0	0.176471	1	0.05	0.0145833	0.263158	0.375	0.538462	0.0512821	0.162162	0.227273	0.0083682	0.375	0.3125	0.119048	0.227273	0.4375	0.192308	0.0344828	0.263158	0.333333	0.272727	0	0.157895	0.022508	0.0555556	0.5	0.411765	0.0952381	0.15
GBM_M34	0.354839	0.1875	0.0275229	0.282051	0.233333	0.0540541	0.0724638	1	0.3	0.275862	0.0545455	0.153846	0.294118	0.205882	0.526316	0.310345	0.306122	0.421053	0.333333	0.371429	0.0357143	0.171429	0.28125	0.551724	0	0.181818	0.0436137	0.142857	0.357143	0.322581	0.285714	0.142857
HNSC_M213	0.588235	0.210526	0.04	0.294118	0.375	0.0909091	0.016632	0.3	1	0.466667	0.0487805	0.216216	0.380952	0.3	0.5	0.4375	0.166667	0.26087	0.470588	0.178571	0.0232558	0.238095	0.368421	0.363636	0	0.25	0.0322581	0.190476	0.642857	0.444444	0.170732	0.25
KICH_M177	0.388889	0.235294	0	0.25	0.538462	0.1	0.0434783	0.333333	0.466667	1	0.0512821	0.194444	0.285714	0.263158	0.466667	0.4	0.146341	0.227273	0.533333	0.192308	0.0285714	0.333333	0.411765	0.333333	0	0.210526	0.0159744	0.15	0.615385	0.411765	0.121951	0.15
LGG_M105	0.391304	0.166667	0.0238095	0.227273	0.227273	0.0740741	0.0714286	0.294118	0.380952	0.285714	0.0434783	0.162791	1	0.291667	0.45	0.4	0.148936	0.214286	0.363636	0.1875	0.0216606	0.192308	0.291667	0.296296	0	0.2	0.0333333	0.153846	0.4	0.347826	0.204545	0.153846
LUAD_M1172	0.588235	0.352941	0	0.294118	0.375	0.0909091	0.0384615	0.344828	0.5	0.466667	0.075	0.285714	0.45	0.3	1	0.642857	0.166667	0.294118	0.5625	0.32	0.0220588	0.238095	0.625	0.428571	0	0.315789	0.0191083	0.190476	0.642857	0.529412	0.2	0.190476
LUAD_M668	0.277778	0.166667	0.0265487	0.255814	0.171429	0.0487805	0.0704225	0.526316	0.264706	0.205882	0.0508475	0.185185	0.263158	0.184211	1	0.272727	0.283019	0.380952	0.294118	0.368421	0.0333333	0.152174	0.285714	0.484848	0	0.162162	0.0462963	0.1	0.272727	0.25	0.288462	0.128205
LUSC_M154	0.529412	0.375	0	0.235294	0.3125	0.0454545	0.0187891	0.315789	0.4375	0.4	0.105263	0.189189	0.4	0.25	0.642857	1	0.142857	0.217391	0.5	0.185185	0.0454545	0.190476	0.470588	0.380952	0	0.2	0.0159236	0.142857	0.571429	0.5625	0.175	0.2
OV_M43	0.222222	0.117647	0.0540541	0.190476	0.15625	0.0487805	0.0724638	0.421053	0.181818	0.15625	0.0545455	0.0909091	0.157895	0.138889	0.380952	0.208333	0.254902	1	0.176471	0.230769	0.0357143	0.195122	0.171429	0.40625	0	0.181818	0.0339506	0.0727273	0.151515	0.171429	0.211538	0.142857
PAAD_M32	0.473684	0.333333	0.08	0.277778	0.4375	0.0869565	0.0689655	0.35	0.470588	0.533333	0.0731707	0.210526	0.363636	0.285714	0.5625	0.5	0.190476	0.25	1	0.214286	0.021978	0.285714	0.5	0.409091	0	0.238095	0.0190476	0.181818	0.6	0.5	0.166667	0.181818
SARC_M387	0.380952	0.470588	0.0434783	0.2	0.333333	0.0833333	0.025641	0.333333	0.368421	0.411765	0.097561	0.236842	0.291667	0.217391	0.625	0.470588	0.159091	0.24	0.5	0.25	0.0416667	0.217391	1	0.333333	0	0.227273	0.0157729	0.125	0.470588	0.473684	0.136364	0.173913
SKCM_M140	0.375	0.208333	0.03	0.322581	0.272727	0.0714286	0.0530303	0.551724	0.363636	0.333333	0.0652174	0.186047	0.296296	0.230769	0.484848	0.380952	0.27907	0.40625	0.409091	0.392857	0.0425532	0.185185	0.333333	1	0	0.25	0.0415335	0.148148	0.380952	0.333333	0.255814	0.148148
UCEC_M99	0.625	0.294118	0	0.3125	0.5	0.0952381	0.0187891	0.357143	0.642857	0.615385	0.05	0.222222	0.4	0.25	0.642857	0.571429	0.142857	0.235294	0.6	0.28	0.0333333	0.315789	0.470588	0.380952	0	0.263158	0.0191693	0.2	1	0.5625	0.175	0.142857
UCS_M1683	0.526316	0.388889	0	0.2	0.411765	0.0434783	0.0186722	0.322581	0.444444	0.411765	0.097561	0.175	0.347826	0.217391	0.529412	0.5625	0.133333	0.24	0.5	0.25	0.0357143	0.217391	0.473684	0.333333	0	0.173913	0.0157729	0.125	0.5625	1	0.162791	0.227273
BLCA_M380	1	1	0.833333	0.166667	0	0.411765	0.833333	0.0714286	0.103448	0.0526316	0.833333	0.049505	0.0833333	0.785714	0.916667	0.923077	0.0740741	0.833333	0.170213	0.846154	0.047619	0.347826	0.5	0.769231	0	0.103448	0.833333	0.0983607	0	0.222222	0.642857	0.0584416
BRCA_M484	1	1	0.833333	0.166667	0	0.411765	0.833333	0.0714286	0.103448	0.0526316	0.833333	0.049505	0.0833333	0.785714	0.916667	0.923077	0.0740741	0.833333	0.170213	0.846154	0.047619	0.347826	0.5	0.769231	0	0.103448	0.833333	0.0983607	0	0.222222	0.642857	0.0584416
CESC_M341	0.833333	0.833333	1	0.181818	0	0.294118	0.666667	0.05	0.0714286	0.0555556	0.666667	0.0505051	0.0648148	0.642857	0.75	0.769231	0.08	0.666667	0.12766	0.833333	0.05	0.318182	0.375	0.75	0	0.0344828	0.818182	0.0833333	0	0.235294	0.615385	0.0454545
DLBC_M546	0.411765	0.411765	0.294118	0.0769231	0	1	0.466667	0.0714286	0.0666667	0.0526316	0.375	0.0416667	0.0636364	0.388889	0.4375	0.388889	0.0740741	0.466667	0.1	0.333333	0	0.148148	0.333333	0.277778	0.03125	0.103448	0.294118	0.0519481	0.047619	0.128205	0.352941	0.047619
ESCA_M118	0.833333	0.833333	0.666667	0.181818	0	0.466667	1	0.0769231	0.111111	0.0555556	0.666667	0.0505051	0.0849057	0.769231	0.909091	0.769231	0.08	1	0.177778	0.692308	0.05	0.318182	0.466667	0.615385	0	0.111111	0.666667	0.101695	0	0.235294	0.75	0.0592105
KIRC_M430	0.833333	0.833333	0.666667	0.181818	0	0.375	0.666667	0.0769231	0.111111	0.0322581	1	0.04	0.0648148	0.642857	0.75	0.769231	0.0384615	0.666667	0.152174	0.692308	0.05	0.318182	0.375	0.615385	0	0.111111	0.666667	0.0833333	0	0.235294	0.5	0.0522876
LIHC_M202	0.785714	0.785714	0.642857	0.16	0	0.388889	0.769231	0.0689655	0.1	0.0512821	0.642857	0.0490196	0.0825688	1	0.846154	0.733333	0.0714286	0.769231	0.166667	0.666667	0.0465116	0.28	0.470588	0.6	0.0714286	0.1	0.642857	0.0967742	0	0.216216	0.6	0.0580645
LUAD_M64	0.916667	0.916667	0.75	0.173913	0	0.4375	0.909091	0.0740741	0.107143	0.0540541	0.75	0.05	0.0841121	0.846154	1	0.846154	0.0769231	0.909091	0.173913	0.769231	0.0487805	0.304348	0.533333	0.692308	0	0.107143	0.75	0.1	0	0.228571	0.692308	0.0588235
LUSC_M41	0.923077	0.923077	0.769231	0.16	0	0.388889	0.769231	0.0689655	0.1	0.0512821	0.769231	0.0490196	0.0825688	0.733333	0.846154	1	0.0714286	0.769231	0.166667	0.785714	0.0465116	0.333333	0.470588	0.714286	0	0.1	0.769231	0.0967742	0	0.216216	0.6	0.0580645
OV_M595	0.833333	0.833333	0.666667	0.181818	0	0.466667	1	0.0769231	0.111111	0.0555556	0.666667	0.0505051	0.0849057	0.769231	0.909091	0.769231	0.08	1	0.177778	0.692308	0.05	0.318182	0.466667	0.615385	0	0.111111	0.666667	0.101695	0	0.235294	0.75	0.0592105
PCPG_M151	0.846154	0.846154	0.833333	0.166667	0	0.333333	0.692308	0.0714286	0.0666667	0.0526316	0.692308	0.049505	0.0733945	0.666667	0.769231	0.785714	0.0740741	0.692308	0.145833	1	0.047619	0.347826	0.411765	0.642857	0	0.0666667	0.833333	0.0806452	0	0.210526	0.533333	0.0516129
SARC_M899	0.5	0.5	0.375	0.047619	0	0.333333	0.466667	0.0714286	0.0666667	0.0810811	0.375	0.0291262	0.0636364	0.470588	0.533333	0.470588	0.0740741	0.466667	0.1	0.411765	0.0416667	0.148148	1	0.352941	0	0.103448	0.375	0.0519481	0.04	0.128205	0.352941	0.0444444
SKCM_M164	0.526316	0.526316	0.5	0.137931	0	0.208333	0.421053	0.047619	0.0571429	0.0465116	0.421053	0.0471698	0.0608696	0.428571	0.473684	0.5	0.0625	0.421053	0.111111	0.45	0.0243902	0.2	0.26087	1	0.0263158	0.0333333	0.421053	0.075	0	0.166667	0.4	0.0612245
SKCM_M740	0.769231	0.769231	0.75	0.173913	0	0.277778	0.615385	0.0496454	0.0689655	0.0540541	0.615385	0.05	0.0642202	0.6	0.692308	0.714286	0.0769231	0.615385	0.125	0.642857	0.0285714	0.25	0.352941	1	0	0.0333333	0.615385	0.0819672	0	0.222222	0.571429	0.0454545
THCA_M264	0.833333	0.833333	0.818182	0.181818	0	0.294118	0.666667	0.0769231	0.0714286	0.0378378	0.666667	0.04	0.0648148	0.642857	0.75	0.769231	0.0384615	0.666667	0.152174	0.833333	0.05	0.380952	0.375	0.615385	0	0.0714286	1	0.0833333	0	0.235294	0.5	0.0454545
UVM_M305	0.642857	0.642857	0.615385	0.173913	0	0.352941	0.75	0.0571429	0.107143	0.0540541	0.5	0.05	0.0740741	0.6	0.692308	0.6	0.0769231	0.75	0.148936	0.533333	0.0487805	0.25	0.352941	0.571429	0	0.0689655	0.5	0.1	0	0.222222	1	0.0519481
BLCA_M1545	1	0.47619	0.0235294	0.047619	0	0.142857	0.45	0.0769231	0.5	0.166667	0.130435	0.121212	0.03125	0.125	0.3	0.5	0.047619	0.391304	0.0869565	0.04	0.0689655	0.192308	0.1	0.0571429	0.307692	0.0512821	0.0454545	0.0416667	0.0810811	0.166667	0.0384615	0.125
BLCA_M231	1	0.433333	0.0759494	0.031746	0	0.113924	0.576923	0.0625	0.607143	0.159091	0.117647	0.166667	0.037037	0.3	0.407407	0.714286	0.0833333	0.578947	0.166667	0.0925926	0.102564	0.28	0.214286	0.117647	0.533333	0.0465116	0.03125	0.0294118	0.0612245	0.25	0.0277778	0.147059
BLCA_M882	1	0.565217	0.025	0.0384615	0	0.130435	0.545455	0.0701754	0.727273	0.130435	0.148148	0.166667	0.027027	0.142857	0.55	0.518519	0.0449438	0.608696	0.111111	0.0380952	0.125	0.333333	0.173913	0.0540541	0.392857	0.0506329	0.04	0.0344828	0.0714286	0.130435	0.0344828	0.103448
BRCA_M240	0.565217	1	0.0606061	0.0333333	0	0.153846	0.461538	0.0655738	0.555556	0.153846	0.129032	0.107143	0.03125	0.0909091	0.4	0.451613	0.0430108	0.464286	0.133333	0.0366972	0.0810811	0.212121	0.107143	0.0588235	0.34375	0.06	0.0344828	0.030303	0.0652174	0.135135	0.0322581	0.0588235
ESCA_M103	0.576923	0.461538	0.0382166	0.0357143	0	0.107143	1	0.0425532	0.538462	0.121951	0.115385	0.128205	0.0240964	0.172414	0.375	0.535714	0.0967742	0.625	0.142857	0.0373832	0.0625	0.204082	0.115385	0.0833333	0.413793	0.0434783	0.037037	0.0322581	0.0714286	0.217391	0.0344828	0.133333
HNSC_M139	0.727273	0.555556	0.0571429	0.03125	0	0.142857	0.538462	0.0634921	1	0.142857	0.121212	0.230769	0.0377358	0.225806	0.423077	0.678571	0.0857143	0.482759	0.0909091	0.0606061	0.105263	0.272727	0.222222	0.0789474	0.551724	0.0612245	0.030303	0.0277778	0.0967742	0.189189	0.025641	0.117647
LUAD_M79	0.55	0.4	0.0252101	0.04	0	0.136364	0.375	0.0277778	0.423077	0.0869565	0.153846	0.108108	0.0277778	0.0361446	1	0.37931	0.0222222	0.529412	0.115385	0.037037	0.09375	0.421053	0.181818	0.0384615	0.266667	0.0512821	0.0416667	0.0416667	0.0384615	0.0882353	0.0384615	0.0344828
LUSC_M1110	0.5	0.25	0.0285714	0.05	0	0.15	0.333333	0.0576923	0.333333	0.142857	0.166667	0.2	0.0322581	0.238095	0.294118	1	0.0526316	0.333333	0.1	0.0454545	0.0714286	0.214286	0.105263	0.1	0.5	0.0526316	0.047619	0.0434783	0.0833333	0.25	0.030303	0.181818
LUSC_M434	0.714286	0.451613	0.0740741	0.0425532	0	0.129032	0.535714	0.0606061	0.678571	0.152174	0.111111	0.214286	0.0357143	0.366667	0.37931	1	0.0789474	0.512195	0.15625	0.0892857	0.097561	0.346939	0.2	0.134615	0.714286	0.0576923	0.0294118	0.0263158	0.0882353	0.27027	0.0277778	0.138889
OV_M1086	0.608696	0.464286	0.0322581	0.0322581	0.03125	0.0967742	0.625	0.04	0.482759	0.107143	0.125	0.146341	0.0247934	0.121212	0.5	0.483871	0.0333333	1	0.129032	0.0363636	0.0789474	0.28125	0.103448	0.0784314	0.375	0.047619	0.0333333	0.0408163	0.0638298	0.148148	0.03125	0.0882353
OV_M1774	0.5	0.347826	0.0350877	0.04	0	0.0952381	0.380952	0.0282258	0.375	0.166667	0.181818	0.0882353	0.03125	0.0512821	0.529412	0.285714	0	1	0.190476	0.0434783	0.0740741	0.291667	0.1	0.0454545	0.133333	0.047619	0.05	0.04	0.0666667	0.05	0.0454545	0.046875
OV_M589	0.578947	0.325581	0.0645161	0.028169	0.0208333	0.146067	0.447368	0.0416667	0.439024	0.132075	0.0833333	0.147541	0.04	0.232558	0.333333	0.512195	0.0816327	1	0.139535	0.0895522	0.06	0.322034	0.263158	0.0952381	0.428571	0.046875	0.0217391	0.0384615	0.0888889	0.229167	0.0225989	0.0961538
READ_M687	0.333333	0.185185	0.0392157	0.0454545	0	0.157895	0.153846	0.0416667	0.259259	0.0526316	0.125	0.0952381	0.0434783	0.0434783	0.421053	0.233333	0.047619	0.277778	0.0612245	0.0434783	0.103448	1	0.210526	0.0434783	0.206897	0.0454545	0.0434783	0.0357143	0.0434783	0.0967742	0.0454545	0.047619
STAD_M101	0.533333	0.34375	0.0625	0.0444444	0	0.137931	0.413793	0.0625	0.551724	0.133333	0.0967742	0.195122	0.037037	0.3	0.266667	0.714286	0.0833333	0.428571	0.129032	0.0588235	0.102564	0.361702	0.172414	0.117647	1	0.0816327	0.0294118	0.0294118	0.129032	0.285714	0.0253165	0.147059
STAD_M444	0.37931	0.233333	0.0675676	0.0512821	0	0.111111	0.296296	0.0508475	0.344828	0.107143	0.12	0.131579	0.037037	0.32	0.208333	0.5	0.0645161	0.35	0.16	0.06	0.0645161	0.380952	0.0277778	0.133333	1	0.0681818	0.0357143	0.0333333	0.0740741	0.227273	0.027027	0.178571
BLCA_M167	1	0.0680101	0.471698	0.06	0.25	0.0853659	0.5	0.0943396	0.470588	0.04	0.0384615	0.0952381	0.130435	0.45098	0.56	0.547619	0.15	0.421053	0.283019	0.0352941	0.038961	0.315789	0.418182	0.0547945	0.470588	0.0561798	0.0300752	0.05	0.0545455	0.169811	0.0363636	0.0606061
BLCA_M693	1	0.0487179	0.465116	0.0555556	0.277778	0.0862069	0.459459	0.102564	0.366667	0.0571429	0.0434783	0.084507	0.121212	0.404762	0.5	0.5625	0.181818	0.388889	0.261905	0.0428571	0.0263158	0.214286	0.3125	0.0689655	0.428571	0.0526316	0.0277778	0.0666667	0.075	0.171429	0.05	0.0576923
CESC_M134	0.471698	0.0582278	1	0.0930233	0.25	0.0779221	0.5	0.0612245	0.5	0.046875	0.0363636	0.0617284	0.15	0.446809	0.469388	0.552632	0.170732	0.416667	0.265306	0.0307692	0.03125	0.285714	0.44	0.0597015	0.468085	0.0612245	0.0266667	0.0555556	0.0612245	0.162791	0.0408163	0.0888889
ESCA_M198	0.5	0.0568475	0.5	0.117647	0.333333	0.0882353	1	0.102564	0.366667	0.0571429	0.038961	0.0536913	0.233333	0.512821	0.536585	0.666667	0.21875	0.470588	0.261905	0.0357143	0.0336134	0.285714	0.536585	0.0588235	0.621622	0.102564	0.0307692	0.0398406	0.0560748	0.205882	0.05	0.0784314
HNSC_M101	0.4	0.0521092	0.418182	0.0740741	0.150943	0.0722892	0.301887	0.0545455	1	0.0545455	0.0677966	0.0967742	0.0833333	0.275862	0.3	0.354167	0.127273	0.333333	0.172414	0.0307692	0.0833333	0.25	0.344828	0.1	0.271186	0.0588235	0.0784314	0.145455	0.0756303	0.191489	0.0508475	0.0704225
HNSC_M1176	0.366667	0.0366492	0.35	0.0869565	0.227273	0.0869565	0.366667	0.111111	1	0.0416667	0.046875	0.0666667	0.142857	0.277778	0.351351	0.48	0.238095	0.321429	0.212121	0.0434783	0.04	0.205882	0.315789	0.0485437	0.305556	0.0434783	0.0222222	0.0606061	0.0714286	0.272727	0.0322581	0.0769231
HNSC_M520	0.470588	0.0532995	0.5	0.0731707	0.181818	0.0810811	0.363636	0.0652174	1	0.0454545	0.0384615	0.0779221	0.102564	0.326531	0.352941	0.435897	0.132075	0.375	0.204082	0.0357143	0.0441176	0.263889	0.408163	0.0495868	0.32	0.0588235	0.0384615	0.0588235	0.0652174	0.236842	0.06	0.0701754
LIHC_M466	0.45098	0.0769231	0.446809	0.131579	0.323529	0.0821918	0.512821	0.0909091	0.326531	0.0677966	0.047619	0.0819672	0.166667	1	0.511111	0.527778	0.189189	0.341463	0.26087	0.0327869	0.0406504	0.304348	0.416667	0.0769231	0.511628	0.0909091	0.037037	0.0472441	0.0465116	0.210526	0.0491803	0.0714286
LIHC_M80	0.421053	0.0652174	0.415094	0.111111	0.268293	0.075	0.434783	0.0784314	0.309091	0.0606061	0.0408163	0.0735294	0.03125	1	0.442308	0.44186	0.159091	0.329114	0.226415	0.0294118	0.0465116	0.310811	0.388889	0.0813008	0.44	0.0784314	0.045977	0.045977	0.0416667	0.177778	0.0441176	0.0634921
LUAD_M274	0.56	0.0636132	0.469388	0.0930233	0.25641	0.0833333	0.536585	0.106383	0.352941	0.046875	0.0444444	0.0886076	0.179487	0.511111	1	0.552632	0.170732	0.36	0.319149	0.046875	0.04	0.287671	0.384615	0.0597015	0.468085	0.0833333	0.0357143	0.0555556	0.0612245	0.191489	0.0384615	0.0666667
LUSC_M412	0.5625	0.0546875	0.552632	0.0967742	0.285714	0.09375	0.666667	0.114286	0.48	0.0645161	0.047619	0.0735294	0.178571	0.527778	0.552632	1	0.206897	0.4375	0.4	0.0384615	0.0338983	0.315789	0.475	0.0636364	0.513514	0.0833333	0.0327869	0.0731707	0.0833333	0.194444	0.0555556	0.0851064
OV_M1520	0.388889	0.0465116	0.311111	0.0625	0.272727	0.0625	0.470588	0.147059	0.321429	0.0384615	0.0606061	0.0428571	0.178571	0.341463	0.340909	0.4375	0.166667	1	0.166667	0.025	0.0294118	0.173913	0.340909	0.0617284	0.435897	0.0645161	0.0285714	0.0588235	0.0588235	0.162162	0.0555556	0.0625
OV_M856	0.421053	0.0717703	0.416667	0.0694444	0.205128	0.0660377	0.347826	0.0649351	0.375	0.0325203	0.0263158	0.0740741	0.0280702	0.329114	0.36	0.348485	0.134146	1	0.194805	0.0241935	0.0318471	0.256757	0.416667	0.0526316	0.375	0.0535714	0.0243902	0.0481928	0.0410959	0.126761	0.0315789	0.0533333
SARC_M167	0.418182	0.0609137	0.44	0.0930233	0.25641	0.0921053	0.536585	0.0612245	0.408163	0.0454545	0.0348837	0.0506329	0.15	0.416667	0.384615	0.475	0.2	0.416667	0.192308	0.0363636	0.0422535	0.285714	1	0.0569106	0.533333	0.0833333	0.027027	0.0425532	0.0517241	0.166667	0.0461538	0.0666667
STAD_M99	0.470588	0.066838	0.468085	0.128205	0.314286	0.0958904	0.621622	0.0888889	0.32	0.0666667	0.0361446	0.0653595	0.194444	0.511628	0.468085	0.513514	0.25	0.435897	0.204082	0.0322581	0.0441176	0.304348	0.533333	0.0625	1	0.0888889	0.028169	0.0429688	0.0530973	0.236842	0.0483871	0.0625
BRCA_M405	0.348485	1	0.363636	0.178571	0.244444	0.0727273	0.309091	0.314815	0.0625	0.137931	0.287879	0.304348	0.269231	0.354167	0.366667	0.392857	0.264368	0.302326	0.261905	0.230769	0.215909	0.215686	0.377778	0.208333	0.384615	0.0252101	0.27957	0.372093	0.444444	0.344262	0.029703	0.205128
CESC_M250	0.371429	0.363636	1	0.227273	0.257143	0.0681818	0.411765	0.282609	0	0.0384615	0.307692	0.411765	0.191781	0.241379	0.272727	0.428571	0.180723	0.352941	0.322581	0.166667	0.193548	0.392857	0.315789	0.210526	0.428571	0.0294118	0.205882	0.342857	0.394737	0.272727	0.0285714	0.296296
ESCA_M489	0.297297	0.304348	0.411765	0.2	0.257143	0.0714286	1	0.229167	0.025641	0.0384615	0.275	0.263158	0.16	0.261905	0.272727	0.346939	0.195122	0.210526	0.36	0.123288	0.193548	0.392857	0.25	0.210526	0.428571	0.0294118	0.175824	0.305556	0.394737	0.272727	0.0277778	0.296296
ESCA_M79	0.289855	0.309091	0.304348	0.178571	0.302326	0.0609756	1	0.267857	0.0196078	0.1	0.3125	0.311688	0.192771	0.326531	0.301587	0.392857	0.195652	0.268293	0.325	0.132075	0.188889	0.319149	0.291667	0.183673	0.44	0.0263158	0.226804	0.255319	0.413043	0.322581	0.0625	0.236842
GBM_M85	0.239437	0.314815	0.282609	0.203704	0.170213	0.0487805	0.267857	1	0.0185185	0.12069	0.291667	0.282609	0.324324	0.28	0.246154	0.327586	0.224719	0.261364	0.333333	0.283784	0.191011	0.22	0.418605	0.163265	0.314815	0.0253165	0.238095	0.288889	0.391304	0.306452	0.0240964	0.210526
KIRP_M514	0.230769	0.304348	0.411765	0.227273	0.1	0.0681818	0.263158	0.282609	0.0263158	0.0512821	0.342105	1	0.225352	0.2	0.186441	0.294118	0.180723	0.352941	0.28125	0.2	0.206897	0.21875	0.351351	0.179487	0.304348	0.0311111	0.242424	0.305556	0.325	0.296296	0.0277778	0.296296
LUSC_M326	0.319444	0.392857	0.404255	0.2	0.291667	0.0568182	0.392857	0.327586	0.0178571	0.0909091	0.326923	0.35443	0.25	0.267857	0.333333	1	0.247312	0.282609	0.311111	0.2	0.189474	0.307692	0.36	0.163636	0.471698	0.0330579	0.302083	0.326531	0.392157	0.375	0.0280374	0.232558
LUSC_M987	0.212121	0.238095	0.428571	0.179487	0.16129	0.04	0.290323	0.214286	0	0.0408163	0.30303	0.290323	0.144928	0.166667	0.169811	1	0.125	0.266667	0.222222	0.169231	0.173913	0.368421	0.272727	0.1875	0.333333	0.0319149	0.269231	0.258065	0.285714	0.24	0.0384615	0.285714
PAAD_M306	0.346154	0.375	0.322581	0.236842	0.233333	0.0666667	0.325	0.333333	0	0.119048	0.333333	0.28125	0.19403	0.352941	0.272727	0.311111	0.166667	0.269231	1	0.159091	0.2	0.30303	0.34375	0.181818	0.325	0.0321101	0.269231	0.333333	0.4375	0.285714	0.0235294	0.333333
PAAD_M76	0.253731	0.236842	0.27907	0.173077	0.186047	0.060241	0.264151	0.294118	0	0.0892857	0.26087	0.222222	0.205128	0.25	0.222222	0.258621	0.166667	0.205128	1	0.140351	0.159091	0.212766	0.23913	0.12766	0.264151	0.0461538	0.205128	0.255814	0.446809	0.222222	0.031746	0.2
READ_M264	0.19697	0.215686	0.351351	0.142857	0.243243	0.0506329	0.351351	0.22	0.0232558	0.0769231	0.177778	0.22973	0.186667	0.222222	0.241379	0.307692	0.176471	0.235294	0.30303	0.116883	0.193548	1	0.238095	0.2	0.377778	0.0288462	0.166667	0.225	0.447368	0.241379	0.0277778	0.0377358
SARC_M102	0.253968	0.377778	0.315789	0.217391	0.210526	0.0547945	0.291667	0.418605	0.0277778	0.0980392	0.325	0.351351	0.236111	0.309524	0.263158	0.36	0.204819	0.263158	0.34375	0.228571	0.181818	0.242424	1	0.230769	0.291667	0.030837	0.30303	0.289474	0.527778	0.309091	0.032967	0.275862
STAD_M222	0.308824	0.384615	0.428571	0.178571	0.333333	0.0727273	0.44	0.314815	0.0217391	0.118644	0.340426	0.383562	0.2375	0.27451	0.301587	0.471698	0.264368	0.302326	0.325	0.185185	0.229885	0.377778	0.291667	0.16	1	0.0350877	0.265957	0.282609	0.382979	0.344262	0.029703	0.27027
UCEC_M434	0.267606	0.377358	0.326087	0.196429	0.266667	0.0561798	0.351852	0.333333	0.017094	0.0983607	0.306122	0.275	0.25	0.294118	0.31746	0.338983	0.261364	0.292683	0.446809	0.182927	0.2	0.369565	0.431818	0.18	0.327273	0.0422535	0.237113	0.304348	1	0.31746	0.0289855	0.230769
UCEC_M971	0.301587	0.444444	0.394737	0.229167	0.324324	0.0526316	0.413043	0.391304	0.0183486	0.113208	0.365854	0.325	0.260274	0.348837	0.363636	0.392157	0.2875	0.363636	0.4375	0.202703	0.235294	0.447368	0.527778	0.214286	0.382979	0.0304348	0.258427	0.368421	1	0.363636	0.0210526	0.290323
BLCA_M1232	1	0.285714	0.529412	0.181818	0	0.0238095	0.307692	0.285714	0.142857	0.125	0.0857143	0.368421	0.0465116	0.05	0.382353	0.545455	0.145833	0.333333	0.113208	0.344828	0.0357143	0.136364	0.5	0.52381	0.130435	0.0857143	0.04	0.097561	0.192308	0.0645161	0.153846	0.259259
CESC_M1201	0.529412	0.25	1	0.142857	0	0.0125786	0.2	0.172414	0.25	0.1	0.1	0.263158	0.047619	0.0517241	0.285714	0.333333	0.111111	0.222222	0.0754717	0.193548	0.047619	0.15	0.36	0.363636	0.2	0.075	0.0434783	0.102564	0.16	0.0493827	0.12	0.185185
ESCA_M1357	0.107143	0.15	0.166667	0.0526316	0	0.05	1	0.166667	0.4	0	0.176471	0.16	0.105263	0.105263	0.131579	0.277778	0.166667	0.2	0.0384615	0.105263	0.0909091	0.0833333	0.333333	0.0258065	0.571429	0.08	0.05	0.0869565	0.04	0.235294	0.08	0.0645161
ESCA_M514	0.257143	0.228571	0.230769	0.0506329	0	0.0333333	1	0.268293	0.5	0.106383	0.111111	0.324324	0.138889	0.205882	0.465116	0.465116	0.2	0.320755	0.153846	0.2	0.047619	0.2	0.3	0.230769	0.4	0.102041	0.0333333	0.0465116	0.236842	0.138889	0.0444444	0.219512
ESCA_M86	0.247525	0.175439	0.180328	0.0571429	0.0147059	0.0344828	1	0.225806	0.338462	0.0704225	0.134328	0.280702	0.140351	0.131313	0.380952	0.403226	0.233871	0.287671	0.222222	0.161765	0.030303	0.225806	0.261682	0.16129	0.222222	0.0967742	0.03125	0.0392157	0.183333	0.140625	0.0447761	0.15625
HNSC_M984	0.147059	0.192308	0.285714	0.111111	0	0.0416667	0.5	0.115385	1	0.0810811	0.166667	0.193548	0.16	0.208333	0.307692	0.307692	0.241379	0.230769	0.105263	0.09375	0.0666667	0.114286	0.391304	0.125	0.666667	0.0606061	0.0357143	0.0645161	0.206897	0.115385	0.0606061	0.117647
KIRP_M313	0.32	0.230769	0.24	0.192308	0	0.0344828	0.324324	0.28125	0.193548	0.0789474	0.171429	1	0.0714286	0.0869565	0.3	0.318182	0.2	0.40625	0.163636	0.192308	0.0645161	0.19697	0.36	0.275862	0.192308	0.075	0.0689655	0.0441176	0.241379	0.135135	0.09375	0.258065
LUAD_M161	0.382353	0.263158	0.285714	0.125	0	0.037037	0.465116	0.309524	0.307692	0.1	0.128205	0.3	0.157895	0.222222	1	0.736842	0.137931	0.475	0.130435	0.234043	0.027027	0.162791	0.341463	0.378378	0.216216	0.0754717	0.047619	0.0847458	0.219512	0.0731707	0.0888889	0.204545
LUSC_M192	0.382353	0.243243	0.285714	0.153846	0	0.031746	0.465116	0.341463	0.307692	0.1	0.128205	0.3	0.222222	0.257143	0.736842	1	0.147826	0.475	0.114286	0.234043	0.0277778	0.190476	0.341463	0.342105	0.25	0.0754717	0.0416667	0.0847458	0.219512	0.128205	0.0888889	0.204545
LUSC_M682	0.545455	0.222222	0.333333	0.142857	0	0.0171821	0.37931	0.354839	0.151515	0.105263	0.1	0.333333	0.0689655	0.107143	0.514286	1	0.11215	0.483871	0.101695	0.285714	0.0338983	0.107143	0.448276	0.407407	0.103448	0.0731707	0.0481928	0.108696	0.233333	0.0714286	0.125	0.212121
OV_M285	0.290323	0.3	0.1875	0.151515	0.027027	0.0277778	0.302326	0.371429	0.189189	0.0909091	0.0666667	0.40625	0.0882353	0.121212	0.475	0.483871	0.116667	1	0.0923077	0.186047	0.0263158	0.122449	0.297297	0.257143	0.151515	0.0869565	0.0571429	0.04	0.228571	0.0540541	0.05	0.243243
SARC_M1035	0.5	0.206897	0.36	0.133333	0	0.030303	0.354839	0.294118	0.163934	0.128205	0.117647	0.36	0.06	0.0816327	0.341463	0.448276	0.130841	0.297297	0.0806452	0.382353	0.0416667	0.159091	1	0.428571	0.0916031	0.0952381	0.0470588	0.104167	0.181818	0.0714286	0.117647	0.3125
SKCM_M996	0.52381	0.148148	0.363636	0.111111	0	0.030303	0.310345	0.176471	0.125	0.142857	0.0769231	0.304348	0.0425532	0.115385	0.378378	0.407407	0.156863	0.257143	0.105263	0.264706	0.03125	0.115385	0.428571	1	0.0714286	0.05	0.0365854	0.0888889	0.206897	0.037037	0.133333	0.266667
STAD_M113	0.130435	0.25	0.2	0.142857	0	0.0454545	0.571429	0.15	0.666667	0.0416667	0.222222	0.192308	0.15	0.15	0.216216	0.315789	0.25	0.238095	0.0754717	0.0952381	0.0833333	0.107692	0.368421	0.0714286	1	0.0740741	0.0454545	0.08	0.16	0.15	0.0740741	0.0666667
BLCA_M154	1	0.243697	0.495935	0.08	0.020979	0.0551181	0.3125	0.15942	0.384615	0.0841121	0.0990991	0.177515	0.211538	0.343137	0.316176	0.336207	0.276074	0.368421	0.19	0.318966	0.06	0.261745	0.448276	0.310606	0.36	0.1	0.059322	0.0659898	0.0789474	0.333333	0.0402685	0.142857
CESC_M65	0.495935	0.248	1	0.0967742	0.0188679	0.0584416	0.302521	0.166667	0.447619	0.100775	0.106557	0.203488	0.207207	0.394231	0.375	0.372781	0.241379	0.378151	0.209524	0.330579	0.0654206	0.289474	0.396825	0.311594	0.333333	0.1	0.0472441	0.0634146	0.075	0.333333	0.0362319	0.133333
ESCA_M270	0.3125	0.230769	0.302521	0.126984	0.0441176	0.0493827	1	0.119658	0.402439	0.105263	0.113636	0.148649	0.182927	0.2	0.295597	0.354839	0.154839	0.341176	0.323529	0.24	0.0310078	0.155844	0.311321	0.274336	0.573529	0.09375	0.0434783	0.0523256	0.0543478	0.225	0.0285714	0.142857
ESCA_M37	0.277027	0.140187	0.296053	0.0761905	0.0272727	0.0625	1	0.105769	0.286885	0.0808824	0.0872483	0.131944	0.130081	0.194915	0.278351	0.419162	0.133333	0.278689	0.2	0.185714	0.0434783	0.140625	0.248276	0.2	0.40566	0.0849057	0.0518868	0.0484848	0.12931	0.173913	0.0234375	0.119266
ESCA_M952	0.255319	0.243902	0.223301	0.0769231	0.05	0.0576923	1	0.097561	0.30303	0.0909091	0.125	0.110236	0.192982	0.2	0.225	0.276316	0.166667	0.287879	0.25	0.202532	0.0465116	0.108108	0.264368	0.223684	0.418182	0.0789474	0.0487805	0.0482759	0.030303	0.156863	0.0238095	0.159091
HNSC_M121	0.384615	0.279412	0.447619	0.133333	0.025	0.0519481	0.402439	0.153153	1	0.108696	0.130952	0.176056	0.220779	0.280488	0.300885	0.430233	0.173333	0.44186	0.26087	0.301075	0.0474576	0.246377	0.402062	0.27027	0.444444	0.111111	0.0689655	0.0532544	0.0645161	0.274336	0.0298507	0.149254
LUSC_M103	0.294798	0.167832	0.372781	0.0659898	0.0377358	0.0502793	0.419162	0.175141	0.28	0.0789474	0.0883978	0.133028	0.137255	0.193548	0.309598	1	0.153153	0.291139	0.128378	0.218182	0.041958	0.191919	0.241379	0.20765	0.218543	0.0791367	0.0361446	0.057377	0.0993377	0.204301	0.0223464	0.0903955
LUSC_M429	0.336207	0.225	0.358333	0.112676	0.021978	0.0634921	0.354839	0.139344	0.430233	0.0795455	0.115789	0.163399	0.166667	0.208333	0.284553	1	0.147239	0.40625	0.240506	0.233645	0.038961	0.227941	0.300885	0.262136	0.385542	0.140845	0.0508475	0.0617978	0.0514706	0.24	0.025641	0.113924
OV_M1622	0.3	0.162162	0.301724	0.135593	0	0.0666667	0.341176	0.186916	0.353659	0.0744681	0.1125	0.129252	0.207792	0.195402	0.269565	0.311828	0.166667	1	0.211268	0.25	0.0390244	0.174242	0.285714	0.268817	0.430556	0.112903	0.0454545	0.0411765	0.0314961	0.232759	0.0306122	0.142857
OV_M923	0.368421	0.222222	0.378151	0.111111	0	0.0714286	0.295918	0.176471	0.44186	0.0786517	0.120879	0.147436	0.177778	0.244681	0.251969	0.40625	0.189873	1	0.178571	0.266667	0.0414747	0.235294	0.309735	0.271845	0.380952	0.0933333	0.0606061	0.0614525	0.0510949	0.258065	0.027027	0.141026
PAAD_M1060	0.19	0.238095	0.209524	0.131579	0.0487805	0.0512821	0.323529	0.121951	0.26087	0.1	0.15	0.142857	0.169492	0.212121	0.25	0.240506	0.142857	0.211268	1	0.2	0.0272109	0.22	0.21978	0.183673	0.413043	0.153846	0.0461538	0.0337838	0.0288462	0.20202	0.025	0.130435
SARC_M112	0.448276	0.206897	0.396825	0.0952381	0.0543478	0.05	0.311321	0.1875	0.402062	0.08	0.144231	0.216561	0.229167	0.316327	0.257353	0.300885	0.265823	0.309735	0.21978	0.318182	0.0543933	0.267606	1	0.32	0.347368	0.119048	0.0446429	0.0520833	0.0909091	0.3125	0.0352113	0.142857
STAD_M324	0.257732	0.25	0.262136	0.210526	0	0.0520833	0.430769	0.152174	0.343284	0.0833333	0.113636	0.135593	0.220339	0.185714	0.279412	0.392157	0.155172	0.369231	0.413043	0.285714	0.047619	0.185185	0.23913	0.276316	1	0.125	0.0597015	0.0469799	0.0280374	0.232323	0.0434783	0.170213
STAD_M44	0.36	0.277778	0.333333	0.153846	0.0526316	0.0454545	0.573529	0.142857	0.444444	0.0930233	0.125	0.160584	0.228571	0.227848	0.263636	0.385542	0.174825	0.430556	0.385965	0.284091	0.0434783	0.165354	0.347368	0.303922	1	0.113208	0.0493827	0.0493827	0.0361446	0.259259	0.0333333	0.169492
BLCA_M500	1	0.192308	0.16129	0.151515	0	0.192308	0.307692	0.137931	0.52	0.208333	0.208333	0.108696	0.0526316	0.102041	0.225806	0.44	0.0689655	0.30303	0.0740741	0.0344828	0.135135	0.155556	0.230769	0.0833333	0.433333	0.0740741	0.0357143	0.0322581	0.178571	0.166667	0.037037	0.0967742
BRCA_M784	0.340426	1	0.241379	0.0677966	0	0.136842	0.40625	0.208333	0.212766	0.245614	0.176471	0.206349	0.0519481	0.215385	0.346667	0.342105	0.0909091	0.440678	0.0943396	0.0394737	0.240741	0.327586	0.196721	0.142857	0.352941	0.0491803	0.0294118	0.0275229	0.16	0.104167	0.0273973	0.12963
ESCA_M392	0.307692	0.16	0.0689655	0.16129	0	0.115385	1	0.130435	0.44	0.1	0.137931	0.125	0.0857143	0.12	0.275862	0.583333	0.0465116	0.576923	0.08	0.0363636	0.117647	0.162791	0.210526	0.162791	0.64	0.08	0.0384615	0.0344828	0.148148	0.181818	0.0175439	0.0625
ESCA_M59	0.226415	0.40625	0.225806	0.135593	0.0294118	0.166667	1	0.192308	0.34	0.25	0.185185	0.176471	0.0615385	0.220588	0.418919	0.394737	0.0704225	0.263158	0.0543478	0.0375	0.253968	0.311828	0.283333	0.173913	0.411765	0.0461538	0.031746	0.0340909	0.148148	0.0615385	0.0208333	0.140351
HNSC_M168	0.52	0.269231	0.228571	0.176471	0	0.103448	0.44	0.25	1	0.192308	0.193548	0.152174	0.0769231	0.166667	0.3	0.555556	0.0434783	0.363636	0.0689655	0.037037	0.181818	0.227273	0.219512	0.125	0.551724	0.0689655	0.0555556	0.0277778	0.206897	0.153846	0.0285714	0.0909091
LUAD_M34	0.238095	0.375	0.144737	0.114286	0	0.160377	0.418919	0.216667	0.3	0.211268	0.209677	0.213333	0.0526316	0.175	1	0.519481	0.0481928	0.298701	0.0611111	0.034188	0.304348	0.430108	0.257143	0.226667	0.31746	0.0298507	0.027027	0.030303	0.15873	0.111111	0.0394737	0.151515
LUSC_M1169	0.44	0.192308	0.138889	0.151515	0	0.111111	0.416667	0.137931	0.52	0.16	0.208333	0.133333	0.0810811	0.148936	0.245902	1	0.0447761	0.387097	0.0740741	0.0689655	0.111111	0.192308	0.263158	0.106383	0.433333	0.0740741	0.0357143	0.0333333	0.178571	0.166667	0.037037	0.125
LUSC_M117	0.253968	0.355556	0.149254	0.128571	0.0322581	0.169811	0.394737	0.174603	0.316667	0.175676	0.1875	0.194805	0.0519481	0.1875	0.519481	1	0.047619	0.383562	0.0803571	0.0326087	0.246575	0.456522	0.253521	0.177215	0.272727	0.038961	0.0266667	0.03	0.174603	0.078125	0.0324675	0.149254
LUSC_M475	0.428571	0.166667	0.125	0.135135	0	0.129032	0.583333	0.15625	0.555556	0.137931	0.181818	0.142857	0.0731707	0.16	0.311475	1	0.0422535	0.516129	0.0645161	0.0606061	0.125	0.2125	0.238095	0.142857	0.566667	0.0645161	0.0526316	0.03125	0.15625	0.142857	0.0322581	0.111111
OV_M984	0.319149	0.440678	0.203704	0.0508475	0	0.122449	0.26	0.1875	0.211538	0.147541	0.134615	0.153846	0.0434783	0.164179	0.298701	0.383562	0.0597015	1	0.0947368	0.04	0.254237	0.314607	0.241379	0.125984	0.387755	0.0392157	0.0185185	0.0277778	0.117647	0.0816327	0.0215827	0.153846
OV_M985	0.30303	0.117647	0.102564	0.125	0	0.151515	0.576923	0.09375	0.363636	0.0816327	0.142857	0.0943396	0.0681818	0.0882353	0.296875	0.516129	0.0555556	1	0.0909091	0.03125	0.137931	0.176471	0.170213	0.134615	0.470588	0.0588235	0.0285714	0.0263158	0.111111	0.206897	0.0294118	0.0487805
READ_M204	0.217949	0.326923	0.155556	0.091954	0	0.157025	0.311828	0.153846	0.217949	0.157303	0.15	0.148936	0.032	0.193548	0.430108	0.456522	0.0721649	0.314607	0.0612245	0.0373832	0.215909	1	0.235294	0.165563	0.294872	0.0322581	0.0240964	0.0258621	0.139241	0.0617284	0.0294118	0.120482
STAD_M568	0.433333	0.266667	0.148936	0.125	0	0.121212	0.64	0.176471	0.551724	0.12766	0.166667	0.125	0.0681818	0.12963	0.31746	0.566667	0.0384615	0.470588	0.0588235	0.03125	0.14	0.18	0.195652	0.156863	1	0.0588235	0.0487805	0.0263158	0.142857	0.166667	0.0149254	0.0789474
ACC_M455	0.333333	0.354839	0.15625	0.102041	0.0243902	0.0434783	0.375	0.121951	0.0645161	0.0555556	0.0363636	0.0722892	0.0634921	0.0666667	0.46875	0.363636	0.0512821	0.390244	0.433333	0.0357143	0.0434783	0.0612245	0.216667	0.116279	0.166667	0.34375	0.0434783	0.0444444	0.0487805	0.113924	0.0487805	1
BLCA_M170	1	0.647059	0.277778	0.142857	0	0.0454545	0.578947	0.103448	0.106383	0.0909091	0.0454545	0.08	0.0434783	0.0454545	0.571429	0.722222	0.0526316	0.433333	0.611111	0.0294118	0.0384615	0.0555556	0.18	0.172414	0.0576923	0.380952	0.0322581	0.0434783	0.0666667	0.0882353	0.0416667	0.333333
BRCA_M248	0.647059	1	0.25	0.135135	0.037037	0.0526316	0.52381	0.0625	0.102041	0.0882353	0.0465116	0.0740741	0.04	0.0588235	0.521739	0.571429	0.0833333	0.470588	0.631579	0.0454545	0.0384615	0.0769231	0.22	0.16129	0.0503145	0.409091	0.030303	0.0606061	0.0625	0.08	0.0384615	0.354839
ESCA_M280	0.448276	0.419355	0.147059	0.12	0.0227273	0.0277778	1	0.0666667	0.0887097	0.0810811	0.0350877	0.0963855	0.0454545	0.0446429	0.484848	0.424242	0.0547945	0.552632	0.451613	0.0263158	0.0227273	0.0677966	0.171875	0.111111	0.208333	0.285714	0.0434783	0.025641	0.0434783	0.138889	0.0465116	0.365854
ESCA_M966	0.578947	0.52381	0.173913	0.1	0	0.0384615	1	0.0909091	0.0980392	0.0769231	0.037037	0.0930233	0.037037	0.039604	0.608696	0.521739	0.0357143	0.424242	0.571429	0	0.03125	0.0625	0.188679	0.117647	0.121951	0.375	0.037037	0.037037	0.0588235	0.0985915	0.03125	0.375
LUAD_M385	0.555556	0.363636	0.136364	0.105263	0	0.0416667	0.454545	0.0967742	0.102041	0.0833333	0.046875	0.0740741	0.0576923	0.0416667	1	0.571429	0.0677966	0.451613	0.409091	0.04	0.03125	0.0652174	0.173077	0.0909091	0.192308	0.291667	0.037037	0.04	0.0625	0.125	0.030303	0.3125
LUAD_M98	0.571429	0.521739	0.2	0.119048	0	0.0344828	0.608696	0.0833333	0.113208	0.0689655	0.0434783	0.0789474	0.0714286	0.0344828	1	0.583333	0.0625	0.612903	0.636364	0.0333333	0.029703	0.0588235	0.245283	0.138889	0.241379	0.44	0.0338983	0.0333333	0.0540541	0.185185	0.0322581	0.46875
LUSC_M275	0.722222	0.571429	0.217391	0.125	0.0333333	0.037037	0.521739	0.0882353	0.0961538	0.0740741	0.037037	0.0666667	0.0545455	0.037037	0.583333	1	0.0740741	0.5	0.545455	0.00934579	0.030303	0.0612245	0.207547	0.147059	0.0967742	0.307692	0.0277778	0.0357143	0.0571429	0.112676	0.0344828	0.363636
OV_M1260	0.352941	0.470588	0.176471	0.0882353	0	0.0526316	0.3	0.0625	0.0642202	0.05	0.0526316	0.105263	0.0508475	0.0526316	0.363636	0.272727	0.05	1	0.444444	0.0327869	0.04	0.0526316	0.142857	0.148148	0.0833333	0.368421	0.0434783	0.05	0.05	0.1	0.0740741	0.233333
OV_M661	0.433333	0.40625	0.142857	0.117647	0	0.0273973	0.552632	0.0909091	0.0967742	0.0512821	0.0379747	0.0697674	0.0769231	0.0526316	0.612903	0.5	0.0540541	1	0.483871	0.0487805	0.0338983	0.0684932	0.206349	0.108696	0.277778	0.352941	0.0425532	0.0416667	0.0425532	0.2	0.0425532	0.390244
PAAD_M485	0.611111	0.631579	0.238095	0.131579	0	0.0357143	0.571429	0.09375	0.1	0.08	0.04	0.0714286	0.0384615	0.0384615	0.636364	0.545455	0.0491803	0.483871	1	0	0	0.0512821	0.215686	0.15625	0.103448	0.454545	0.030303	0.0322581	0.0606061	0.1	0.037037	0.433333
TGCT_M92	0.380952	0.409091	0.130435	0.102564	0	0.04	0.375	0.09375	0.0784314	0.08	0.0357143	0.0714286	0.0384615	0.04	0.44	0.307692	0.0491803	0.368421	0.454545	0.0357143	0.04	0.0416667	0.215686	0.121212	0.0714286	1	0.0163043	0.0588235	0.0384615	0.0769231	0.0191083	0.34375
BLCA_M561	1	0.366667	0.237288	0.171429	0.0769231	0.0555556	0.302326	0.322581	0.25	0.142857	0.111111	0.219178	0.212121	0.314286	0.37931	0.413793	0.180723	0.361111	0.266667	0.175	0.0727273	0.133333	0.272727	0.154639	0.0769231	0.106383	0.0454545	0.0666667	0.325581	0.153846	0.047619	0.142857
BRCA_M203	0.297297	1	0.178571	0.206897	0.0638298	0.0735294	0.282051	0.25	0.346154	0.0869565	0.148148	0.169014	0.172414	0.290323	0.416667	0.346154	0.137931	0.30303	0.28	0.0512821	0.0645161	0.0851064	0.285714	0.12766	0.0377358	0.0697674	0.0437956	0.0606061	0.275	0.185185	0.0344828	0.166667
BRCA_M737	0.366667	1	0.153846	0.272727	0	0.0869565	0.34375	0.333333	0.473684	0.102564	0.142857	0.169231	0.227273	0.375	0.588235	0.473684	0.156863	0.384615	0.388889	0.0625	0.0833333	0.0833333	0.380952	0.11236	0.0434783	0.0540541	0.0416667	0.0434783	0.257143	0.212121	0.0434783	0.206897
ESCA_M271	0.302326	0.34375	0.171875	0.162162	0	0.0526316	1	0.34375	0.264706	0.0740741	0.0714286	0.123457	0.135135	0.263158	0.354839	0.482759	0.104478	0.416667	0.25	0.0888889	0.0714286	0.0816327	0.257143	0.128713	0.0677966	0.0588235	0.0272109	0	0.282609	0.122449	0.0487805	0.136364
GBM_M118	0.322581	0.333333	0.153846	0.166667	0	0.0869565	0.34375	1	0.4	0.075	0.0869565	0.117647	0.125	0.375	0.421053	0.647059	0.113208	0.384615	0.388889	0.0967742	0.0606061	0.0645161	0.380952	0.1	0.04	0.0833333	0.030303	0.037037	0.222222	0.0810811	0.03125	0.129032
HNSC_M683	0.242424	0.473684	0.153846	0.217391	0	0.0869565	0.264706	0.4	1	0.162162	0.0909091	0.117647	0.173913	0.32	0.421053	0.333333	0.118421	0.333333	0.315789	0.1	0.039604	0.117647	0.318182	0.125	0.0666667	0.017094	0.0461538	0.0689655	0.157895	0.176471	0.0392157	0.25
LIHC_M427	0.314286	0.375	0.203704	0.222222	0.0434783	0.0714286	0.263158	0.375	0.32	0.142857	0.103448	0.153846	0.142857	1	0.454545	0.434783	0.216216	0.322581	0.363636	0.181818	0.047619	0.075	0.416667	0.11828	0.1	0.128205	0.0444444	0.0588235	0.225	0.184211	0.0333333	0.176471
LUAD_M276	0.37931	0.588235	0.134615	0.285714	0	0.0909091	0.354839	0.421053	0.421053	0.103448	0.130435	0.136364	0.238095	0.454545	1	0.588235	0.137255	0.458333	0.5	0.0666667	0.0612245	0.0869565	0.473684	0.101124	0.0416667	0.0169492	0.0305344	0.04	0.264706	0.147059	0.030303	0.133333
LUSC_M427	0.413793	0.473684	0.176471	0.217391	0.0434783	0.0869565	0.482759	0.647059	0.333333	0.075	0.0869565	0.142857	0.173913	0.434783	0.588235	1	0.134615	0.5	0.470588	0.0967742	0.0714286	0.0645161	0.45	0.11236	0.04	0.0833333	0.03125	0.037037	0.294118	0.142857	0.037037	0.129032
OV_M624	0.361111	0.384615	0.214286	0.2	0.0322581	0.0645161	0.416667	0.384615	0.333333	0.0851064	0.137931	0.150685	0.166667	0.322581	0.458333	0.5	0.135593	1	0.32	0.166667	0.0761905	0.0697674	0.321429	0.163043	0.030303	0.0681818	0.0359712	0.0416667	0.333333	0.2	0.0285714	0.162162
PAAD_M963	0.266667	0.388889	0.117647	0.25	0	0.0882353	0.25	0.388889	0.315789	0.142857	0.0909091	0.140625	0.142857	0.363636	0.5	0.470588	0.191489	0.32	1	0.0714286	0.0408163	0.153846	0.444444	0.116279	0.0454545	0.0285714	0.0390625	0.0491803	0.171429	0.0882353	0.03125	0.142857
SARC_M616	0.272727	0.380952	0.173077	0.26087	0.037037	0.130435	0.257143	0.380952	0.318182	0.0731707	0.0769231	0.115942	0.12	0.416667	0.473684	0.45	0.153846	0.321429	0.444444	0.0625	0.0392157	0.0833333	1	0.0989011	0.0384615	0.0526316	0.030303	0.0357143	0.184211	0.108108	0.04	0.0909091
BLCA_M602	1	0.3	0.285714	0.0645161	0	0.0384615	0.269231	0.0454545	0.444444	0.0952381	0.0434783	0.0952381	0.0869565	0.147059	0.0735294	0.111111	0.238095	0.304348	0.08	0.1	0.0238095	0.157895	0.411765	0.263158	0.25	0.0615385	0.0540541	0.0454545	0.210526	0.185185	0.025	0.047619
BRCA_M673	0.3	1	0.357143	0.0416667	0.0322581	0.0689655	0.25	0.0434783	0.647059	0.0967742	0.0434783	0.0869565	0.173913	0.108108	0.0869565	0.0833333	0.333333	0.4	0.1	0.0909091	0.0909091	0.142857	0.368421	0.3	0.391304	0.08	0.108108	0.0408163	0.136364	0.172414	0.037037	0.0434783
CESC_M46	0.285714	0.357143	1	0.0294118	0.025641	0.0512821	0.40625	0.0357143	0.461538	0.0731707	0.0526316	0.0606061	0.0571429	0.108696	0.0897436	0.107143	0.310345	0.529412	0.0487805	0.0789474	0.0625	0.133333	0.322581	0.2	0.3125	0.102564	0.0851064	0.0338983	0.129032	0.222222	0.03125	0.0425532
ESCA_M359	0.269231	0.25	0.40625	0.0322581	0.03125	0.0606061	1	0.0263158	0.346154	0.0789474	0.0555556	0.0666667	0.0625	0.142857	0.108108	0.134615	0.458333	0.4	0.0526316	0.0857143	0.0689655	0.24	0.310345	0.269231	0.444444	0.0985915	0.0666667	0.0338983	0.142857	0.28125	0.031746	0.0454545
HNSC_M590	0.444444	0.647059	0.461538	0.0416667	0.0322581	0.0689655	0.346154	0.0434783	1	0.0967742	0.0416667	0.0869565	0.125	0.171429	0.102941	0.130435	0.333333	0.454545	0.0645161	0.0909091	0.0909091	0.263158	0.529412	0.444444	0.454545	0.109375	0.108108	0.0408163	0.136364	0.214286	0.0344828	0.0434783
MESO_M1602	0.238095	0.333333	0.310345	0.0416667	0.0350877	0.0689655	0.458333	0.0333333	0.333333	0.0967742	0.0638298	0.0869565	0.08	0.108108	0.0869565	0.142857	1	0.333333	0.0645161	0.0689655	0.0909091	0.263158	0.347826	0.238095	0.391304	0.08	0.0789474	0.0416667	0.136364	0.214286	0.0273224	0.0540541
OV_M1436	0.290323	0.4	0.529412	0.0263158	0.0454545	0.0465116	0.4	0.0333333	0.448276	0.0666667	0.0491803	0.0540541	0.0789474	0.122449	0.0853659	0.118644	0.272727	1	0.0444444	0.0714286	0.0555556	0.151515	0.363636	0.25	0.352941	0.103896	0.0784314	0.04	0.114286	0.297297	0.0306122	0.0434783
OV_M1997	0.304348	0.333333	0.448276	0.0357143	0.0327869	0.0606061	0.392857	0.04	0.454545	0.0857143	0.0588235	0.0740741	0.0689655	0.125	0.0821918	0.12	0.333333	1	0.031746	0.09375	0.0769231	0.217391	0.4	0.25	0.333333	0.0882353	0.097561	0.0377358	0.0740741	0.151515	0.0322581	0.0487805
SARC_M1362	0.411765	0.368421	0.285714	0.047619	0.0344828	0.08	0.269231	0.0454545	0.529412	0.0666667	0.0454545	0.0454545	0.136364	0.181818	0.1	0.0909091	0.3	0.363636	0.0689655	0.0769231	0.0487805	0.08	1	0.333333	0.304348	0.0689655	0.114286	0.0454545	0.15	0.28	0.0769231	0.0571429
SARC_M822	0.318182	0.347826	0.322581	0.0384615	0.0294118	0.0666667	0.310345	0.0408163	0.47619	0.0882353	0.06	0.037037	0.111111	0.157895	0.08	0.0784314	0.347826	0.4	0.0588235	0.0645161	0.0666667	0.173913	1	0.26087	0.296296	0.0909091	0.128205	0.037037	0.12	0.233333	0.0645161	0.0769231
SKCM_M1534	0.263158	0.3	0.2	0.0135135	0.0344828	0.0740741	0.269231	0.0357143	0.444444	0.103448	0.0625	0.0952381	0.136364	0.147059	0.0895522	0.157895	0.238095	0.25	0.0408163	0.12	0.0487805	0.222222	0.333333	1	0.363636	0.0952381	0.0540541	0	0.0952381	0.230769	0.0454545	0.0454545
STAD_M146	0.25	0.391304	0.3125	0.0357143	0.0588235	0.0606061	0.444444	0.03125	0.454545	0.0857143	0.0384615	0.0740741	0.148148	0.153846	0.112676	0.142857	0.391304	0.352941	0.0882353	0.0769231	0.0769231	0.272727	0.304348	0.363636	1	0.119403	0.0465116	0.0333333	0.115385	0.266667	0.015873	0.0357143
BRCA_M873	0.264706	1	0.318182	0.24	0	0.047619	0.4	0.0909091	0.421053	0.0909091	0.0273973	0.119048	0.571429	0.296296	0.304348	0.275862	0.0847458	0.227273	0.26087	0.0869565	0.190476	0.3	0.45	0.0952381	0.32	0.0416667	0.0869565	0.130435	0.104651	0.409091	0.2	0.1
CESC_M175	0.297297	0.318182	1	0.285714	0	0.0384615	0.434783	0.102564	0.391304	0.115385	0.0434783	0.130435	0.421053	0.37931	0.458333	0.4	0.131148	0.19697	0.214286	0.122449	0.192308	0.257143	0.416667	0.12	0.407407	0.166667	0.0344828	0.107143	0.172414	0.333333	0.16	0.08
ESCA_M1059	0.305556	0.4	0.434783	0.346154	0	0.04	1	0.0847458	0.55	0.166667	0.03125	0.159091	0.529412	0.444444	0.36	0.464286	0.114754	0.205128	0.32	0.148936	0.2	0.387097	0.65	0.173913	0.541667	0.125	0.0740741	0.111111	0.137931	0.458333	0.217391	0.130435
HNSC_M256	0.393939	0.421053	0.391304	0.307692	0	0.0416667	0.55	0.0862069	1	0.125	0.0344828	0.136364	0.5625	0.357143	0.32	0.428571	0.135593	0.25	0.391304	0.152174	0.26087	0.272727	0.52381	0.130435	0.5	0.0833333	0.0769231	0.115385	0.166667	0.478261	0.173913	0.136364
LGG_M826	0.28125	0.571429	0.421053	0.26087	0	0.111111	0.529412	0.0943396	0.5625	0.157895	0.047619	0.153846	1	0.32	0.333333	0.346154	0.107143	0.25	0.421053	0.142857	0.210526	0.275862	0.5	0.105263	0.409091	0.05	0.0952381	0.142857	0.125	0.380952	0.222222	0.111111
LIHC_M236	0.317073	0.296296	0.37931	0.272727	0.030303	0.0285714	0.444444	0.113636	0.357143	0.115044	0.0540541	0.115385	0.32	1	0.28125	0.411765	0.119403	0.287879	0.212121	0.150943	0.275862	0.315789	0.428571	0.214286	0.375	0.0967742	0.0588235	0.0882353	0.191011	0.3125	0.129032	0.1
LUAD_M184	0.25641	0.304348	0.458333	0.193548	0	0.037037	0.36	0.1	0.32	0.0714286	0.0357143	0.104167	0.333333	0.28125	1	0.30303	0.105263	0.178571	0.166667	0.0980392	0.148148	0.25	0.346154	0.0740741	0.3	0.115385	0.03125	0.0666667	0.134831	0.275862	0.111111	0.0769231
LUSC_M574	0.365854	0.275862	0.4	0.294118	0.025641	0.0315789	0.464286	0.0851064	0.428571	0.121212	0.0666667	0.132075	0.346154	0.411765	0.30303	1	0.149254	0.338462	0.3125	0.166667	0.314286	0.3	0.4	0.16129	0.533333	0.125	0.0555556	0.0833333	0.2	0.466667	0.15625	0.09375
PAAD_M559	0.263158	0.26087	0.214286	0.16129	0	0.08	0.32	0.0487805	0.391304	0.131579	0.0740741	0.106383	0.421053	0.212121	0.171053	0.3125	0.131148	0.170732	1	0.170213	0.225806	0.189189	0.259259	0.105263	0.357143	0.037037	0.0714286	0.0689655	0.149425	0.241379	0.0740741	0.0952381
SARC_M87	0.297297	0.45	0.416667	0.333333	0	0.0344828	0.65	0.102564	0.52381	0.16	0.0357143	0.155556	0.5	0.428571	0.346154	0.4	0.15	0.230769	0.259259	0.170213	0.192308	0.333333	1	0.12	0.461538	0.12	0.0714286	0.107143	0.136364	0.5	0.16	0.125
STAD_M67	0.3	0.32	0.407407	0.290323	0	0.0320285	0.541667	0.078125	0.5	0.137931	0.0285714	0.142857	0.409091	0.375	0.3	0.533333	0.123077	0.285714	0.357143	0.134615	0.206897	0.333333	0.461538	0.103448	1	0.103448	0.0625	0.09375	0.155556	0.538462	0.178571	0.107143
UCS_M168	0.25	0.409091	0.333333	0.310345	0	0.0322581	0.458333	0.0806452	0.478261	0.107143	0.0357143	0.125	0.380952	0.3125	0.275862	0.466667	0.126984	0.259259	0.241379	0.117647	0.222222	0.277778	0.5	0.111111	0.538462	0.0714286	0.0666667	0.1	0.146067	1	0.192308	0.115385
ACC_M631	0.0344828	0.291667	0.106667	0.18	0.0645161	0.125	0.269231	0.0357143	0.36	0.212121	0.146667	0.375	0.0701754	0.103448	0.269231	0.3125	0.347826	0.0689655	0.0571429	0.458333	0.0454545	0.153846	0.428571	0.0576923	0.291667	0.0344828	0.0344828	0.0638298	0.0851064	0.0967742	0.037037	1
BRCA_M569	0.0344828	1	0.137931	0.121951	0.04	0.0980392	0.352941	0.0416667	0.421053	0.178571	0.0972222	0.368421	0.0641026	0.0869565	0.3	0.4	0.5	0.222222	0.0454545	0.454545	0.0909091	0.135135	0.4375	0.0909091	0.411765	0.0384615	0.0454545	0.0487805	0.128205	0.08	0	0.291667
HNSC_M996	0.0344828	0.421053	0.125	0.178571	0	0.113208	0.238095	0.037037	1	0.2	0.108108	0.318182	0.0754717	0.12	0.380952	0.52	0.421053	0.173913	0.047619	0.521739	0.08	0.153846	0.625	0.0625	0.35	0.0363636	0.04	0.0697674	0.119048	0.111111	0.030303	0.36
KIRP_M570	0.0357143	0.368421	0.130435	0.263158	0.0769231	0.0943396	0.217391	0.0278884	0.318182	0.25	0.140845	1	0.0897436	0.0566038	0.333333	0.37037	0.238095	0.142857	0.0416667	0.478261	0.0512821	0.136364	0.315789	0.0869565	0.238095	0.037037	0.0285714	0.0185185	0.0952381	0.16	0	0.375
LUAD_M12	0.0357143	0.3	0.166667	0.142857	0.0769231	0.0740741	0.333333	0.032	0.380952	0.166667	0.0945946	0.333333	0.0493827	0.0566038	1	0.423077	0.3	0.130435	0.0416667	0.307692	0.0434783	0.136364	0.388889	0.0434783	0.3	0.03125	0.04	0.0465116	0.0408163	0.0740741	0.0408163	0.269231
LUSC_M1078	0.0555556	0.4	0.157895	0.211538	0.0882353	0.0983607	0.275862	0.0470588	0.52	0.222222	0.125	0.37037	0.0681818	0.0588235	0.423077	1	0.346154	0.137931	0.04	0.433333	0.0638298	0.177778	0.416667	0.0727273	0.296296	0.0483871	0.030303	0.0384615	0.1	0.0857143	0.0344828	0.3125
MESO_M430	0.0179856	0.5	0.137931	0.121951	0.04	0.12	0.238095	0.0416667	0.421053	0.137931	0.0821918	0.238095	0.0588235	0.136364	0.3	0.346154	1	0.0909091	0.0382166	0.333333	0.0540541	0.135135	0.4375	0.0909091	0.263158	0.0384615	0.0454545	0.0487805	0.1	0.08	0.0434783	0.347826
PCPG_M1183	0.0333333	0.333333	0.15625	0.191489	0.0357143	0.111111	0.227273	0.0357143	0.47619	0.2	0.136986	0.428571	0.0609756	0.115385	0.304348	0.344828	0.333333	0.166667	0.0465116	1	0.037037	0.121951	0.6875	0.0612245	0.333333	0.0689655	0.0384615	0.0681818	0.0909091	0.107143	0	0.458333
PCPG_M527	0.0606061	0.454545	0.171429	0.227273	0.03125	0.122807	0.291667	0.0352941	0.521739	0.22807	0.144737	0.478261	0.0833333	0.137931	0.307692	0.433333	0.333333	0.185185	0.0426829	1	0.0681818	0.162791	0.55	0.0769231	0.333333	0.0606061	0.0333333	0.0625	0.130435	0.129032	0	0.444444
SARC_M1495	0.04	0.4375	0.142857	0.133333	0	0.122449	0.25	0.0434783	0.625	0.150943	0.114286	0.315789	0.06	0.0909091	0.388889	0.416667	0.4375	0.15	0.0526316	0.6875	0.0454545	0.138889	1	0.0444444	0.4375	0.0392157	0.047619	0.0769231	0.075	0.0833333	0.0344828	0.428571
STAD_M245	0.0179856	0.411765	0.137931	0.0697674	0	0.0566038	0.277778	0.0322581	0.35	0.178571	0.0972222	0.238095	0.0384615	0.0416667	0.3	0.296296	0.263158	0.2	0.0344828	0.333333	0.0909091	0.135135	0.4375	0.0434783	1	0.0384615	0.0454545	0.0487805	0.1	0.0384615	0.0333333	0.291667
BLCA_M174	1	0.467532	0.312977	0.103448	0	0.126582	0.506024	0.152778	0.239437	0.0918367	0.113636	0.218391	0.138462	0.152778	0.421053	0.445783	0.15	0.260274	0.158416	0.0384615	0.0581395	0.280899	0.343284	0.149425	0.278481	0.102941	0.0434783	0.0384615	0.132353	0.36036	0.0666667	0.110092
BLCA_M715	1	0.522388	0.267717	0.0882353	0	0.147059	0.443038	0.180328	0.241935	0.0786517	0.12987	0.223881	0.166667	0.147541	0.492308	0.434211	0.145695	0.265625	0.164835	0.0420168	0.0666667	0.240964	0.274194	0.1125	0.216216	0.122807	0.032967	0.0447761	0.103448	0.308411	0.0705882	0.0891089
BRCA_M214	0.522388	1	0.254545	0.0992366	0	0.174603	0.428571	0.214286	0.25	0.0833333	0.152778	0.246575	0.113208	0.0819672	0.631579	0.567164	0.134228	0.240385	0.159091	0.0526316	0.0704225	0.291667	0.196078	0.15	0.162162	0.176471	0.0344828	0.047619	0.121951	0.342466	0.0833333	0.0927835
BRCA_M756	0.387097	1	0.292683	0.0940171	0	0.16	0.342857	0.181818	0.227273	0.102941	0.175439	0.171875	0.131579	0.0985915	0.45283	0.390625	0.116788	0.177083	0.179487	0.0634921	0.0833333	0.222222	0.204082	0.204545	0.216216	0.257143	0.031746	0.0638298	0.0857143	0.301587	0.0888889	0.111111
ESCA_M60	0.506024	0.428571	0.310078	0.0833333	0	0.102564	1	0.123077	0.223881	0.0842105	0.091954	0.211765	0.102941	0.142857	0.438356	0.5	0.152866	0.236842	0.106796	0.043956	0.0568182	0.290698	0.225352	0.182927	0.272727	0.142857	0.0367647	0.04	0.121212	0.321429	0.0594059	0.122222
LUAD_M165	0.492308	0.631579	0.28	0.103175	0	0.169492	0.438356	0.26	0.27451	0.0875	0.164179	0.283582	0.148936	0.0892857	1	0.587302	0.126984	0.266667	0.141176	0.0540541	0.0757576	0.353846	0.217391	0.142857	0.191489	0.195652	0.0377358	0.0338983	0.16	0.347826	0.0714286	0.118644
LUAD_M23	0.3	0.325397	0.202128	0.0700637	0.0137931	0.0833333	0.306569	0.116279	0.24031	0.101695	0.0780142	0.151079	0.0909091	0.14876	1	0.492857	0.101852	0.32	0.089172	0.0462428	0.0743802	0.227273	0.125	0.132616	0.109244	0.10219	0.026506	0.0223464	0.0878378	0.242424	0.0514706	0.09375
LUSC_M107	0.313559	0.414141	0.24375	0.0751445	0.0169492	0.115385	0.369369	0.170213	0.242991	0.0634921	0.0775862	0.176991	0.0824742	0.108911	0.492857	1	0.104712	0.568807	0.116279	0.0451613	0.0729167	0.273585	0.147059	0.134454	0.0957447	0.127273	0.025	0.0285714	0.107438	0.25	0.0545455	0.0737705
LUSC_M1130	0.373134	0.466667	0.311111	0.0894309	0	0.163636	0.386364	0.348837	0.363636	0.0933333	0.140625	0.307692	0.152174	0.0909091	0.566038	1	0.116667	0.295455	0.164557	0.0576923	0.0819672	0.33871	0.275	0.156863	0.186047	0.190476	0.0441176	0.037037	0.171429	0.313433	0.0784314	0.0909091
LUSC_M443	0.445783	0.567164	0.291339	0.0942029	0	0.173913	0.5	0.25	0.305085	0.0769231	0.111111	0.25641	0.111111	0.0860215	0.587302	1	0.113924	0.295238	0.159574	0.0495868	0.0641026	0.351351	0.214286	0.151515	0.134146	0.155172	0.0352941	0.0428571	0.151163	0.329114	0.0746269	0.103448
OV_M523	0.166667	0.240385	0.175	0.0542169	0.0212766	0.0606061	0.264368	0.164706	0.207921	0.05	0.0654206	0.119266	0.0930233	0.134831	0.32	0.568807	0.0695187	1	0.0689655	0.0408163	0.0823529	0.164062	0.164835	0.117117	0.119048	0.153061	0.023622	0.0211268	0.0982143	0.162162	0.0714286	0.0619469
CESC_M1043	0.15	0.0633803	1	0.0384615	0.0465116	0	0.0714286	0.583333	0.037037	0.0444444	0.419355	0.030303	0.6	0.714286	0.0424242	0.0384615	0.121951	0.108434	0.117647	0.285714	0.025	0.04	0.473684	0.117647	0.0512821	0.030303	0.0333333	0.5	0.0465116	0.0352941	0.0175439	0.204545
GBM_M428	0.0983607	0.0505051	0.428571	0.0357143	0.0487805	0	0.0769231	1	0.0357143	0.0384615	0.3125	0.0322581	0.428571	0.36	0.0416667	0.0333333	0.097561	0.0909091	0.1	0.212766	0.0254237	0.0434783	0.238095	0.125	0.0540541	0.0322581	0.0357143	0.315789	0.0487805	0.04	0.0151515	0.125
GBM_M80	0.136364	0.0608108	0.583333	0.0294118	0.0408163	0	0.0588235	1	0.0277778	0.0392157	0.470588	0.025641	0.652174	0.555556	0.0409357	0.0263158	0.126437	0.101124	0.105263	0.382979	0.0285714	0.0322581	0.36	0.1	0.0444444	0.025641	0.0277778	0.434783	0.0408163	0.0666667	0	0.229167
KIRC_M355	0.109589	0.0516129	0.419355	0.034188	0.0363636	0.0857143	0.05	0.470588	0.027972	0.0447761	1	0.0461538	0.466667	0.5	0.0337079	0.0153374	0.0947368	0.0721649	0.078125	0.5	0.0227273	0.0291971	0.25	0.0869565	0.0392157	0.025641	0.0625	0.3	0.0363636	0.0666667	0.0526316	0.203704
LGG_M108	0.15	0.0633803	0.6	0.0384615	0	0	0.0714286	0.652174	0	0	0.466667	0.030303	1	0.5	0.0424242	0.0159236	0.115385	0.0857143	0.117647	0.384615	0.025	0.04	0.473684	0.117647	0.0224719	0.030303	0	0.588235	0.0465116	0.0833333	0	0.204545
LIHC_M220	0.0625	0.0273973	0.47619	0.0869565	0.047619	0.0416667	0.0416667	0.37037	0.0344828	0.0454545	0.34375	0.0294118	0.291667	1	0.04	0.0285714	0.0581395	0.0705882	0.0357143	0.4	0.03125	0.0357143	0.227273	0.0416667	0.0526316	0.0357143	0.0344828	0.111111	0.04	0.0344828	0	0.209302
LIHC_M23	0.140625	0.0616438	0.714286	0.0366972	0.0425532	0.111111	0.0625	0.555556	0.0298507	0.0408163	0.5	0.0273973	0.5	1	0.0414201	0.025	0.116279	0.103448	0.109091	0.428571	0.027027	0.0310078	0.391304	0.105263	0.0465116	0.030303	0.0294118	0.409091	0.0425532	0.0337079	0.0169492	0.266667
PCPG_M254	0.0833333	0.038961	0.242424	0.0454545	0.0277778	0.0307692	0.0540541	0.305556	0.0277778	0.0277778	0.472222	0.0425532	0.322581	0.363636	0.0350877	0.0277778	0.0857143	0.0434783	0.047619	1	0.0227273	0.0294118	0.275862	0.0315789	0.0277778	0.0277778	0.025641	0.241379	0.0322581	0.0377358	0	0.215686
PCPG_M878	0.0895522	0.0402685	0.285714	0.03125	0.0322581	0.111111	0.0625	0.354839	0.0298507	0.0322581	0.5	0.0273973	0.384615	0.428571	0.0232558	0	0.1	0.0487805	0.0517241	1	0.0344828	0.0344828	0.333333	0.0322581	0.0322581	0.0322581	0.0294118	0.291667	0.0263158	0.0416667	0	0.23913
SARC_M130	0.12069	0.05	0.473684	0.0526316	0	0.0144404	0.0833333	0.36	0.0173913	0	0.25	0	0.473684	0.391304	0.04	0.03125	0.136364	0.0625	0.104167	0.333333	0.0352941	0.037037	1	0.0967742	0.0357143	0.015	0	0.533333	0	0.0384615	0.0181818	0.195122
THYM_M665	0.142857	0.057971	0.5	0.029703	0	0.0108303	0.0869565	0.434783	0	0.0434783	0.3	0	0.588235	0.409091	0.04375	0.0161812	0.142857	0.1	0.130435	0.291667	0.026087	0.05	0.533333	0.137931	0.0204082	0.0157895	0	1	0.0526316	0.0375	0.0183486	0.176471
CESC_M1068	0.160714	0.0190476	1	0.318182	0.214286	0.269231	0.0434783	0.238095	0.0535714	0.26087	0.444444	0	0.368421	0.444444	0.5	0.470588	0.0869565	0.0291262	0.0391304	0.243243	0.0660377	0	0.409091	0.347826	0.0967742	0.217391	0.421053	0.130435	0.5625	0.272727	0.030303	0.0555556
CHOL_M106	0.122807	0.0357143	0.318182	1	0.162791	0.185185	0.0357143	0.136364	0.0446429	0.166667	0.315789	0.03125	0.25	0.315789	0.368421	0.333333	0.0909091	0.0333333	0.0333333	0.184211	0.0566038	0.0416667	0.304348	0.25	0.0806452	0.173913	0.3	0.136364	0.411765	0.230769	0.0416667	0.0487805
KIRC_M372	0.173077	0	0.444444	0.315789	0.236842	0.272727	0.0246914	0.294118	0.0529801	0.25	1	0.0454545	0.571429	0.692308	0.642857	0.615385	0.105263	0.047619	0.0444444	0.3125	0.0686275	0.0344828	0.5	0.421053	0.0847458	0.263158	0.533333	0.1	0.75	0.263158	0.0384615	0.0625
LGG_M716	0.150943	0	0.368421	0.25	0.205128	0.26087	0.0289256	0.294118	0.0460526	0.25	0.571429	0	1	0.571429	0.533333	0.615385	0.105263	0.037037	0.0416667	0.235294	0.0582524	0	0.421053	0.35	0.0666667	0.263158	0.4375	0.1	0.615385	0.208333	0	0.0625
LIHC_M451	0.173077	0	0.444444	0.315789	0.236842	0.272727	0.0246914	0.294118	0.0529801	0.25	0.692308	0.030303	0.571429	1	0.642857	0.615385	0.105263	0.0416667	0.039823	0.272727	0.0686275	0	0.5	0.421053	0.0847458	0.263158	0.533333	0.1	0.75	0.263158	0	0.0625
LUAD_M603	0.192308	0.0625	0.5	0.368421	0.263158	0.304348	0.0291971	0.277778	0.0596026	0.3	0.642857	0	0.533333	0.642857	1	0.692308	0.1	0.0909091	0.0442478	0.34375	0.0784314	0.047619	0.555556	0.473684	0.101695	0.25	0.6	0.15	0.833333	0.315789	0.0454545	0.0606061
LUSC_M184	0.176471	0	0.470588	0.333333	0.243243	0.333333	0.0454545	0.3125	0.0533333	0.333333	0.615385	0	0.615385	0.615385	0.692308	1	0.111111	0.0416667	0.04	0.28125	0.0693069	0	0.529412	0.444444	0.0862069	0.277778	0.571429	0.166667	0.818182	0.277778	0.05	0.0645161
SARC_M1023	0.178571	0	0.409091	0.304348	0.238095	0.27027	0.1	0.227273	0.0580645	0.25	0.5	0.037037	0.421053	0.5	0.555556	0.529412	0.0833333	0.0740741	0.0434783	0.305556	0.0857143	0.0322581	1	0.391304	0.125	0.208333	0.473684	0.125	0.625	0.26087	0.0384615	0.0540541
SKCM_M152	0.157895	0.0384615	0.347826	0.25	0.209302	0.236842	0.0241935	0.173913	0.0530973	0.2	0.421053	0	0.35	0.421053	0.473684	0.444444	0.0833333	0.037037	0.038961	0.236842	0.0654206	0.0333333	0.391304	1	0.078125	0.16	0.4	0.125	0.529412	0.26087	0.04	0.0540541
THCA_M207	0.169811	0.0454545	0.421053	0.3	0.230769	0.304348	0.0291971	0.277778	0.0526316	0.238095	0.533333	0	0.4375	0.533333	0.6	0.571429	0.1	0.047619	0.0396476	0.264706	0.0679612	0	0.473684	0.4	0.0833333	0.25	1	0.15	0.692308	0.25	0.03125	0.0606061
UCEC_M306	0.2	0	0.5625	0.411765	0.277778	0.333333	0.0296296	0.3125	0.0604027	0.333333	0.75	0	0.615385	0.75	0.833333	0.818182	0.111111	0.0330033	0.0446429	0.322581	0.08	0	0.625	0.529412	0.105263	0.277778	0.692308	0.166667	1	0.352941	0	0.0645161
CESC_M96	0.0921053	0.0487805	1	0.0697674	0.025641	0.0350877	0.4	0.0263158	0.172414	0.030303	0.0461538	0.0652174	0.128205	0.125	0.0909091	0.333333	0.0645161	0.37931	0.193548	0.0933333	0.0526316	0.214286	0.413793	0.104478	0.137931	0.333333	0.0294118	0.0434783	0.130435	0.056338	0.0873786	0.214286
ESCA_M1290	0.0909091	0.0231959	0.296296	0.0606061	0.0357143	0.047619	1	0.0224719	0.0833333	0.0333333	0.0454545	0.0857143	0.1	0.0714286	0.0895522	0.434783	0.0454545	0.26087	0.3	0.0441176	0.04	0.210526	0.304348	0.0677966	0.151515	0.388889	0.0344828	0.0243902	0.0512821	0.0491803	0.0454545	0.151515
ESCA_M473	0.075	0.0454545	0.4	0.0869565	0.0238095	0.0333333	1	0.025641	0.15625	0.0263158	0.0597015	0.0612245	0.146341	0.181818	0.128205	0.424242	0.0943396	0.410714	0.176471	0.0555556	0.0357143	0.233333	0.294118	0.1	0.163636	0.344828	0.025974	0.027027	0.1	0.0684932	0.0681818	0.238095
LUSC_M207	0.0535714	0.0859375	0.301587	0.0779221	0	0.0217391	0.393443	0.032967	0.166667	0.0409357	0.04	0.0561798	0.144737	0.125	0.104651	1	0.1	0.473684	0.0895522	0.0825688	0.0224719	0.129032	0.241935	0.10101	0.2125	0.2	0.025974	0.0241935	0.0864198	0.05	0.144144	0.164384
LUSC_M731	0.08	0.047619	0.333333	0.0731707	0.0322581	0.0363636	0.434783	0.0416667	0.0606061	0.030303	0.0322581	0.0681818	0.135135	0.0507812	0.102041	1	0.0263158	0.583333	0.206897	0.0526316	0.0294118	0.28	0.344828	0.0909091	0.119048	0.545455	0.0322581	0.0294118	0.0416667	0.057971	0.0322581	0.175
OV_M1053	0.0694444	0.0508475	0.391304	0.0810811	0.030303	0.0392157	0.30303	0.0454545	0.0689655	0.0357143	0.0666667	0.075	0.151515	0.06	0.106383	0.583333	0.08	1	0.24	0.0704225	0.0333333	0.333333	0.4	0.114754	0.133333	0.5	0.0571429	0.0333333	0.0454545	0.0615385	0.037037	0.194444
OV_M335	0.0560748	0.0813008	0.357143	0.0694444	0.028169	0.0294118	0.410714	0.025	0.142857	0.031746	0.0425532	0.060241	0.121212	0.118644	0.0923077	0.473684	0.0897436	1	0.0983607	0.0980392	0.0240964	0.122807	0.20339	0.0833333	0.166667	0.222222	0.028169	0.0263158	0.0789474	0.05	0.0923077	0.161765
OV_M571	0.0714286	0.107692	0.315789	0.0638298	0.0232558	0.0327869	0.261905	0.037037	0.075	0.0540541	0.0545455	0.06	0.116279	0.0742188	0.0961538	0.411765	0.0882353	1	0.171429	0.075	0.025	0.225806	0.285714	0.0985915	0.131579	0.333333	0.0444444	0.025	0.037037	0.0533333	0.0555556	0.177778
READ_M1210	0.0740741	0.0179949	0.238095	0.05	0.037037	0	0.233333	0	0.05	0.0454545	0.0566038	0.0434783	0.105263	0.0357143	0.0769231	0.28	0.047619	0.333333	0.190476	0.0645161	0.0206186	1	0.26087	0.127273	0.173913	0.411765	0.047619	0.125	0.047619	0.0769231	0.0384615	0.233333
SARC_M244	0.0684932	0.0333333	0.413793	0.108108	0.0294118	0.0384615	0.304348	0.0444444	0.0666667	0.0357143	0.0333333	0.1	0.147059	0.0588235	0.112676	0.344828	0.05	0.4	0.230769	0.0405405	0.0377358	0.26087	1	0.0952381	0.0731707	0.409091	0.0344828	0.0322581	0.0444444	0.0769231	0.038835	0.208333
TGCT_M112	0.0735294	0.04	0.4	0.0645161	0	0.0454545	0.388889	0.05	0.0384615	0.04	0.0416667	0.0540541	0.133333	0.0434783	0.0989011	0.545455	0.04	0.5	0.227273	0.04	0.03	0.411765	0.409091	0.0847458	0.115385	1	0.0172414	0.0357143	0.0434783	0.0483871	0.0163934	0.21875
BLCA_M1396	1	0.533333	0.0823529	0.157895	0	0.0545455	0.222222	0.173913	0.277778	0.047619	0.16	0.157895	0.0454545	0.125	0.24	0.3	0.0847458	0.3	0.1	0.115385	0.0434783	0.142857	0.0612245	0.190476	0.217391	0.0789474	0.0425532	0.047619	0.0483871	0.0483871	0.075	0.0465116
BLCA_M703	1	0.5	0.09375	0.166667	0	0.0508475	0.181818	0.192308	0.227273	0.04	0.137931	0.170732	0.0384615	0.115385	0.206897	0.25	0.114754	0.25	0.130435	0.1	0.037037	0.155556	0.0566038	0.16	0.230769	0.0714286	0.0392157	0.04	0.0454545	0.0465116	0.0681818	0.0454545
BRCA_M1241	0.533333	1	0.0740741	0.175	0	0.0454545	0.107143	0.238095	0.222222	0.05	0.166667	0.131579	0.030303	0.121212	0.25	0.315789	0.105263	0.25	0.166667	0.08	0.0434783	0.146341	0.0851064	0.142857	0.173913	0.0769231	0.037037	0.05	0.0491803	0.0526316	0.0769231	0.0454545
BRCA_M647	0.5	1	0.1	0.159091	0	0.0517241	0.25	0.304348	0.3	0.0416667	0.28	0.119048	0.037037	0.14	0.36	0.45	0.135593	0.45	0.136364	0.107143	0.04	0.159091	0.0784314	0.166667	0.16	0.0731707	0.0322581	0.0416667	0.0793651	0.047619	0.0697674	0.08
GBM_M185	0.192308	0.304348	0.1	0.121951	0	0.0517241	0.136364	1	0.3	0.047619	0.185185	0.0526316	0.0416667	0.14	0.285714	0.45	0.0983607	0.208333	0.0740741	0.118644	0.04	0.186047	0.0416667	0.166667	0.0952381	0.0869565	0.0322581	0.0333333	0.0461538	0.0625	0.0666667	0.0666667
HNSC_M638	0.277778	0.3	0.115385	0.119048	0.0434783	0.0555556	0.3125	0.3	1	0.0526316	0.166667	0.075	0.05	0.12766	0.3125	0.5625	0.0862069	0.25	0.0638298	0.0877193	0.0434783	0.205128	0.0851064	0.0909091	0.125	0.0625	0.05	0.037037	0.0454545	0.0952381	0.0769231	0.0714286
LUAD_M103	0.194444	0.314286	0.11	0.240741	0	0.0266667	0.28125	0.243243	0.3125	0.0344828	0.2	0.105263	0.04	0.15873	1	0.40625	0.106667	0.363636	0.0769231	0.108108	0.0266667	0.264151	0.0697674	0.181818	0.119048	0.08	0.0327869	0.0434783	0.105263	0.0632911	0.0508475	0.0777778
LUAD_M396	0.24	0.36	0.102564	0.145833	0	0.0357143	0.380952	0.16129	0.25	0.0357143	0.2	0.133333	0.0526316	0.0892857	1	0.269231	0.109375	0.434783	0.0357143	0.129032	0.0344828	0.122449	0.0967742	0.108434	0.137931	0.105263	0.0357143	0.0588235	0.0666667	0.047619	0.0416667	0.0689655
LUSC_M440	0.3	0.45	0.142857	0.162791	0	0.0526316	0.333333	0.45	0.5625	0.0487805	0.347826	0.0952381	0.0434783	0.12	0.40625	1	0.118644	0.333333	0.0689655	0.101695	0.0416667	0.25	0.08	0.173913	0.153846	0.0909091	0.0454545	0.0333333	0.0806452	0.0634921	0.0689655	0.0681818
OV_M286	0.3	0.45	0.103448	0.0967742	0	0.0434783	0.263158	0.24	0.25	0.0434783	0.291667	0.121951	0.0434783	0.0980392	0.434783	0.333333	0.1	1	0.0416667	0.0833333	0.0416667	0.111111	0.115385	0.125	0.217391	0.102564	0.0434783	0.0689655	0.0833333	0.0416667	0.0465116	0.0833333
BLCA_M435	1	0.148148	0.409091	0.075	0	0.0882353	0.208333	0.125	0.277778	0.104167	0.4375	0.045977	0.214286	0.135135	0.3	0.238095	0.136364	0.212121	0.2	0.08	0.117647	0.115385	0.12	0.0666667	0.411765	0.0714286	0.0434783	0.030303	0.190476	0.142857	0.0666667	0.103448
CESC_M1054	0.409091	0.285714	1	0.121212	0.0714286	0.103448	0.241935	0.129032	0.5	0.138614	0.4	0.107143	0.258065	0.205128	0.636364	0.272727	0.230769	0.25	0.296296	0.142857	0.102564	0.125	0.26087	0.123596	0.318182	0.09375	0.0512821	0.05	0.25	0.18	0.115385	0.0952381
ESCA_M840	0.208333	0.159091	0.172414	0.0697674	0.031746	0.111111	1	0.0833333	0.529412	0.12	0.3	0.0754717	0.233333	0.0869565	0.16	0.212121	0.0714286	0.228571	0.166667	0.0714286	0.0512821	0.1	0.0689655	0.0740741	0.1875	0.0333333	0.0540541	0.0357143	0.166667	0.155556	0.03125	0.0983607
HNSC_M1195	0.277778	0.216216	0.272727	0.0810811	0	0.133333	0.529412	0.111111	1	0.162791	0.538462	0.0851064	0.347826	0.0952381	0.277778	0.307692	0.0909091	0.321429	0.208333	0.0909091	0.0606061	0.113636	0.0869565	0.0952381	0.235294	0.0512821	0.05	0.0294118	0.294118	0.210526	0	0.109091
HNSC_M540	0.275862	0.166667	0.5	0.131579	0.0285714	0.0909091	0.290323	0.108108	1	0.185185	0.307692	0.0736842	0.25	0.152174	0.4	0.230769	0.1875	0.243902	0.322581	0.0857143	0.113636	0.105263	0.129032	0.121951	0.210526	0.0789474	0.0606061	0.0434783	0.2	0.180952	0.0535714	0.136364
KIRC_M1148	0.4375	0.153846	0.4	0.0740741	0.047619	0.0625	0.3	0.0909091	0.538462	0.162791	1	0.0851064	0.291667	0.142857	0.352941	0.3125	0.0909091	0.275862	0.125	0.0634921	0.09375	0.130435	0.0869565	0.0952381	0.4	0.0512821	0.05	0.0204082	0.466667	0.210526	0.05	0.0892857
LUAD_M177	0.375	0.241379	0.636364	0.121212	0.0344828	0.106383	0.241935	0.129032	0.4	0.138614	0.272727	0.291667	0.181818	0.236842	1	0.344828	0.28	0.184211	0.296296	0.142857	0.075	0.125	0.30303	0.136364	0.26087	0.09375	0.0512821	0.0769231	0.208333	0.233333	0.115385	0.0833333
LUAD_M534	0.3	0.192308	0.631579	0.142857	0.0416667	0.0882353	0.2	0.153846	0.37037	0.12766	0.352941	0.130435	0.214286	0.173913	1	0.233333	0.173913	0.212121	0.304348	0.173913	0.0555556	0.148148	0.263158	0.09375	0.333333	0.0714286	0.0588235	0.0909091	0.25	0.142857	0.0909091	0.0967742
STAD_M1165	0.411765	0.121951	0.318182	0.0714286	0.0952381	0.0606061	0.125	0.0869565	0.235294	0.0851064	0.4	0.0465116	0.185185	0.111111	0.333333	0.206897	0.047619	0.1875	0.12	0.0869565	0.0588235	0.08	0.1	0.05	1	0.0434783	0.047619	0	0.210526	0.119048	0.047619	0.103448
UCEC_M288	0.190476	0.175	0.25	0.105263	0	0.0909091	0.166667	0.130435	0.294118	0.130435	0.466667	0.06	0.269231	0.109375	0.25	0.352941	0.130435	0.3	0.192308	0.142857	0.0277778	0.136364	0.128205	0.0869565	0.214286	0.0487805	0.0606061	0.0571429	1	0.230769	0.0454545	0.0689655
BLCA_M622	1	0.424242	0.428571	0.179487	0.0240964	0.0784314	0.424242	0.153846	0.411765	0.0681818	0.133333	0.113208	0.0612245	0.111111	0.342857	0.351351	0.225	0.435897	0.157895	0.169492	0.0793651	0.184211	0.230769	0.25641	0.3125	0.105263	0.04	0.057971	0.185185	0.209302	0.0892857	0.0754717
BRCA_M1311	0.424242	1	0.434783	0.318182	0.0268456	0.0857143	0.5	0.0740741	0.47619	0.0857143	0.159091	0.15625	0.0555556	0.107143	0.428571	0.375	0.230769	0.444444	0.0714286	0.155556	0.0851064	0.177778	0.192308	0.333333	0.470588	0.136364	0.037037	0.0566038	0.119048	0.25	0.047619	0.0416667
CESC_M663	0.428571	0.434783	1	0.230769	0.0263158	0.0540541	0.375	0.109091	0.619048	0.1	0.148936	0.142857	0.0588235	0.0786517	0.434783	0.5	0.25	0.555556	0.0714286	0.145833	0.0588235	0.107143	0.133333	0.291667	0.473684	0.0769231	0.030303	0.0350877	0.108108	0.225806	0.0681818	0.0487805
ESCA_M463	0.424242	0.5	0.375	0.318182	0.02	0.0857143	1	0.0943396	0.47619	0.0714286	0.159091	0.121212	0.0606061	0.107143	0.666667	0.5	0.230769	0.392857	0.0714286	0.181818	0.108696	0.152174	0.148148	0.4	0.470588	0.136364	0.0416667	0.0384615	0.119048	0.296296	0.0731707	0.08
HNSC_M1269	0.411765	0.47619	0.619048	0.304348	0.0266667	0.0833333	0.47619	0.113208	1	0.107143	0.181818	0.151515	0.0540541	0.0930233	0.55	0.545455	0.222222	0.428571	0.0769231	0.177778	0.0833333	0.125	0.142857	0.380952	0.625	0.130435	0.0357143	0.0363636	0.116279	0.285714	0.0714286	0.0512821
LUAD_M469	0.342857	0.428571	0.434783	0.318182	0.0268456	0.0857143	0.666667	0.115385	0.55	0.111111	0.159091	0.135135	0.0555556	0.107143	1	0.571429	0.230769	0.392857	0.0384615	0.181818	0.0851064	0.152174	0.192308	0.4	0.470588	0.136364	0.0416667	0.037037	0.146341	0.296296	0.0731707	0.08
LUSC_M1057	0.351351	0.375	0.5	0.28	0.0196078	0.108108	0.5	0.109091	0.545455	0.1	0.148936	0.111111	0.0512821	0.103448	0.571429	1	0.25	0.448276	0.111111	0.170213	0.08	0.142857	0.172414	0.347826	0.4	0.12	0.0333333	0.0350877	0.111111	0.266667	0.0681818	0.075
LUSC_M411	0.295455	0.290323	0.387097	0.21875	0.01875	0.0909091	0.37931	0.0967742	0.413793	0.0833333	0.12963	0.128205	0.0434783	0.107527	0.428571	1	0.2	0.361111	0.0882353	0.169811	0.0701754	0.125	0.138889	0.272727	0.296296	0.09375	0.027027	0.04	0.0961538	0.216216	0.0588235	0.0869565
OV_M752	0.435897	0.444444	0.555556	0.225806	0.0253165	0.0681818	0.392857	0.116667	0.428571	0.0681818	0.153846	0.125	0.0444444	0.108696	0.392857	0.448276	0.205882	1	0.0555556	0.173077	0.0714286	0.127273	0.142857	0.28125	0.416667	0.0967742	0.0277778	0.0483871	0.0769231	0.257143	0.0816327	0.0625
STAD_M825	0.352941	0.470588	0.473684	0.263158	0.0206897	0	0.470588	0.0816327	0.625	0.1	0.179487	0.111111	0.0143885	0.0731707	0.470588	0.4	0.285714	0.416667	0.0416667	0.146341	0.0697674	0.125	0.130435	0.352941	1	0.111111	0.0454545	0.047619	0.105263	0.304348	0.0833333	0.0540541
KIRC_M102	0.16285	0.232938	0.0756303	0.347751	0.0249307	0.108163	0.221429	0.275701	0.10241	0.311582	1	0.471154	0.199482	0.190594	0.261404	0.208889	0.244275	0.149871	0.412639	0.429333	0.383698	0.129771	0.241379	0.219665	0.165926	0.0810811	0.466146	0.173828	0.232218	0.0769231	0.289157	0.178241
KIRP_M22	0.151815	0.220207	0.084507	0.354528	0.0218978	0.123711	0.245014	0.291209	0.107034	0.330896	0.471154	1	0.213166	0.194444	0.287671	0.205212	0.236052	0.135385	0.398773	0.528239	0.445221	0.128834	0.255132	0.239609	0.173267	0.0872483	0.550955	0.171875	0.212766	0.0891089	0.353982	0.190341
PAAD_M6	0.162637	0.28267	0.0679157	0.344392	0.0199667	0.118182	0.216216	0.271605	0.125	0.301634	0.412639	0.398773	0.173246	0.161765	0.253566	0.216438	0.254766	0.126362	1	0.37246	0.381295	0.121739	0.236052	0.219739	0.191401	0.0727273	0.374459	0.176573	0.226345	0.0741573	0.256729	0.193018
PCPG_M13	0.19214	0.25	0.115385	0.33121	0.0251256	0.133333	0.280142	0.331081	0.108527	0.317172	0.429333	0.528239	0.259109	0.209559	0.296053	0.216102	0.234568	0.14902	0.37246	1	0.420074	0.15873	0.303704	0.234957	0.162362	0.102222	0.527881	0.194149	0.230986	0.123894	0.408088	0.214286
PCPG_M199	0.18254	0.167883	0.113402	0.225806	0.025641	0.122449	0.201258	0.304348	0.129032	0.330357	0.272727	0.326316	0.169231	0.171429	0.189427	0.179487	0.127072	0.125	0.275229	1	0.25	0.135135	0.1875	0.224	0.154639	0.127273	0.412214	0.163043	0.17094	0.12069	0.275449	0.176
PRAD_M268	0.170492	0.148796	0.0747664	0.322835	0.0253807	0.132911	0.208754	0.206154	0.131474	0.247601	0.312039	0.387879	0.184685	0.204268	0.252396	0.182573	0.197115	0.135802	0.278481	0.420074	1	0.09375	0.245552	0.183267	0.136445	0.0933333	0.400685	0.191781	0.176678	0.0927835	0.355872	0.204947
PRAD_M64	0.131387	0.232012	0.0798898	0.347603	0.0192719	0.113333	0.211628	0.253394	0.107356	0.311793	0.383698	0.445221	0.1775	0.167064	0.246998	0.190751	0.22905	0.129676	0.381295	0.402062	1	0.124378	0.230769	0.226141	0.165689	0.0708661	0.396088	0.164436	0.203629	0.0725389	0.295943	0.180365
THCA_M10	0.176471	0.230321	0.0882353	0.337423	0.03125	0.134897	0.247588	0.283537	0.125899	0.313346	0.466146	0.550955	0.229091	0.198653	0.279635	0.184906	0.263789	0.146953	0.374459	0.527881	0.400685	0.131206	0.293515	0.237838	0.155323	0.0869565	1	0.192982	0.230769	0.106299	0.366667	0.205212
THCA_M121	0.192771	0.202073	0.154412	0.266272	0.0403226	0.126316	0.238095	0.300654	0.12234	0.365517	0.299401	0.389831	0.202532	0.221154	0.255906	0.19774	0.210526	0.129534	0.263804	0.423963	0.323276	0.118557	0.276498	0.20678	0.15942	0.108974	1	0.183544	0.194719	0.154839	0.381166	0.170124
UVM_M32	0.157447	0.145349	0.0947867	0.248148	0.0304569	0.11838	0.254355	0.231975	0.108949	0.225989	0.289157	0.353982	0.169811	0.15415	0.247619	0.148594	0.168618	0.126016	0.256729	0.408088	0.355872	0.110687	0.21875	0.173228	0.137681	0.0929204	0.381166	0.159468	0.141361	0.1	1	0.152104
BLCA_M151	1	0.21875	0.324675	0.240964	0.015625	0.0967742	0.385542	0.221053	0.313131	0.0909091	0.153846	0.217949	0.102857	0.183099	0.405797	0.438356	0.164384	0.293578	0.20202	0.15	0.0849057	0.18617	0.301887	0.0933333	0.410959	0.1	0.0735294	0.0422535	0.263889	0.257576	0.05	0.105556
ESCA_M1729	0.385542	0.182609	0.298851	0.2	0.0263158	0.112676	1	0.282828	0.330189	0.0808081	0.116883	0.177778	0.110092	0.1875	0.402299	0.39759	0.173469	0.321739	0.226415	0.131868	0.080292	0.2	0.318584	0.0733333	0.373494	0.115942	0.0632911	0.0686275	0.2	0.287671	0.0555556	0.111111
ESCA_M1919	0.367647	0.218182	0.28169	0.21875	0.037037	0.14	1	0.280488	0.322222	0.0897436	0.142857	0.135135	0.10303	0.196721	0.369863	0.362319	0.183673	0.27451	0.227273	0.125	0.0833333	0.152174	0.309278	0.0757576	0.415385	0.122449	0.0689655	0.0481928	0.206897	0.263158	0.08	0.0994152
LUAD_M1649	0.372549	0.257812	0.339806	0.230088	0	0.0833333	0.36036	0.299145	0.383333	0.0731707	0.132653	0.190909	0.122549	0.257143	1	0.5	0.186441	0.382812	0.22449	0.163636	0.0785714	0.233333	0.328244	0.0967742	0.39	0.0851064	0.0480769	0.0555556	0.198113	0.19	0.0426829	0.129808
LUAD_M1767	0.405063	0.25	0.329268	0.235955	0	0.102941	0.402299	0.366667	0.356436	0.0729167	0.138889	0.146067	0.129944	0.273333	1	0.623188	0.194805	0.357798	0.247934	0.192771	0.0701754	0.223404	0.330275	0.0681818	0.428571	0.123077	0.0666667	0.0606061	0.189189	0.2	0.045977	0.113514
LUAD_M1784	0.405797	0.290909	0.30137	0.230769	0	0.12963	0.35	0.329268	0.333333	0.0722892	0.172414	0.128205	0.107143	0.237762	1	0.580645	0.2	0.288462	0.258427	0.197183	0.0693069	0.19337	0.31	0.0714286	0.391304	0.0925926	0.0819672	0.0601504	0.15625	0.1875	0.0444444	0.103448
LUSC_M149	0.438356	0.215385	0.355263	0.268293	0	0.131148	0.39759	0.314607	0.378947	0.0898876	0.117647	0.156627	0.134503	0.287879	0.623188	1	0.179775	0.365385	0.237113	0.1625	0.0740741	0.205882	0.336538	0.0860215	0.464789	0.196429	0.06	0.0645161	0.205882	0.217391	0.0493827	0.0928962
STAD_M262	0.410959	0.222222	0.280303	0.275362	0	0.135593	0.415385	0.277778	0.357895	0.0795455	0.138462	0.13253	0.109827	0.203947	0.428571	0.464789	0.183908	0.320755	0.242105	0.123457	0.0857143	0.222222	0.317308	0.08	1	0.101695	0.0588235	0.05	0.19403	0.261538	0.0506329	0.116667
STAD_M28	0.357143	0.189189	0.258741	0.2375	0.0645161	0.114286	0.355263	0.247525	0.320755	0.0707071	0.118421	0.117021	0.103261	0.197531	0.375	0.402439	0.163265	0.290598	0.216981	0.108696	0.0775862	0.2	0.286957	0.0769231	1	0.0857143	0.0506329	0.0463576	0.166667	0.223684	0.0444444	0.10687
BRCA_M84	0.259259	1	0.315068	0.241379	0.0909091	0.133333	0.186441	0.203704	0.196078	0.102941	0.274194	0.309278	0.342857	0.307692	0.540984	0.4375	0.284314	0.53125	0.295775	0.0737705	0.0909091	0.101266	0.538462	0.25	0.229167	0.0434783	0.0543478	0.0397351	0.244898	0.310811	0.0666667	0.19697
CESC_M35	0.2	0.315068	1	0.241379	0.0909091	0.0909091	0.346154	0.160714	0.244898	0.0943396	0.129032	0.198113	0.228916	0.416667	0.323944	0.415385	0.212963	0.342466	0.373134	0.10084	0.106667	0.188679	0.355932	0.207547	0.185185	0.0412371	0.0757576	0.0606061	0.222222	0.2125	0.0666667	0.1875
LGG_M398	0.357143	0.342105	0.228916	0.183333	0.0819672	0.118182	0.154545	0.224138	0.156627	0.126866	0.25	0.231481	1	0.22973	0.369863	0.274725	0.304762	0.405405	0.272727	0.119403	0.0675676	0.120482	0.323077	0.236364	0.265625	0.0757576	0.0909091	0.128571	0.264706	0.256098	0.0722892	0.188119
LGG_M933	0.292683	0.342857	0.205128	0.188679	0.0545455	0.116505	0.15534	0.235294	0.157895	0.108527	0.241935	0.237624	1	0.202899	0.373134	0.25	0.29	0.432836	0.25	0.102564	0.0441176	0.118421	0.322034	0.236364	0.280702	0.0677966	0.0704225	0.126984	0.238095	0.25	0.08	0.203125
LIHC_M107	0.236842	0.333333	0.416667	0.196078	0.0652174	0.12963	0.372093	0.148936	0.282051	0.116667	0.192982	0.234043	0.22973	1	0.33871	0.306452	0.282051	0.359375	0.285714	0.100917	0.125	0.238095	0.38	0.232558	0.232558	0.0612245	0.0769231	0.0508475	0.341463	0.246377	0.0666667	0.214286
LUAD_M691	0.294118	0.540984	0.323944	0.272727	0.0943396	0.138614	0.214286	0.188679	0.294118	0.0895522	0.172414	0.237624	0.373134	0.33871	1	0.525424	0.252427	0.476923	0.343284	0.075	0.0943396	0.103896	0.444444	0.283019	0.303571	0.0531915	0.0857143	0.0472973	0.229167	0.283784	0.0684932	0.203125
LUSC_M214	0.306122	0.4375	0.415385	0.259259	0.12	0.13	0.271739	0.173077	0.266667	0.109375	0.137931	0.226415	0.267857	0.306452	0.525424	1	0.27	0.46875	0.353846	0.104348	0.0980392	0.152778	0.461538	0.245283	0.339623	0.056338	0.0724638	0.030303	0.212766	0.207792	0.0704225	0.229508
OV_M612	0.22807	0.53125	0.342466	0.233333	0.0689655	0.121212	0.182692	0.240741	0.211538	0.105263	0.309091	0.34375	0.432836	0.359375	0.476923	0.46875	0.231481	1	0.27027	0.0813008	0.0689655	0.0987654	0.464286	0.285714	0.222222	0.05625	0.0490196	0.0422535	0.236364	0.394366	0.0649351	0.208955
SARC_M142	0.333333	0.538462	0.355932	0.272727	0.0731707	0.10989	0.255814	0.225	0.285714	0.113208	0.227273	0.204545	0.323077	0.38	0.444444	0.461538	0.285714	0.464286	0.333333	0.0769231	0.1	0.146341	1	0.255814	0.264706	0.0677966	0.0833333	0.0384615	0.25	0.227273	0.0491803	0.235294
BLCA_M1152	1	0.409091	0.142857	0.1	0.04	0.0540541	0.388889	0.111111	0.0824742	0.0434783	0.142857	0.192308	0.0434783	0.25	0.196078	0.285714	0.117647	0.238095	0.111111	0.0454545	0.02	0.307692	0.185185	0.0909091	0.294118	0.0555556	0.0392157	0.04	0.0520833	0.0740741	0.115385	0.277778
BRCA_M541	0.409091	1	0.190476	0.173077	0.0294118	0.0344828	0.365854	0.163265	0.122807	0.0980392	0.145833	0.311111	0.0327869	0.2	0.225806	0.478261	0.153846	0.571429	0.318182	0.0363636	0.05	0.322581	0.344828	0.116279	0.444444	0.0857143	0.0344828	0.0422535	0.0909091	0.101695	0.125	0.25
ESCA_M449	0.264151	0.365854	0.234043	0.179104	0.0177515	0.0217391	1	0.136364	0.261905	0.0571429	0.123077	0.425926	0.028169	0.175182	0.205128	0.368421	0.125	0.275	0.175	0.0444444	0.0344828	0.317073	0.23913	0.107955	0.521739	0.0862069	0.0298507	0.0363636	0.0769231	0.0866142	0.145833	0.181818
ESCA_M71	0.288136	0.298246	0.194444	0.197531	0.0160428	0.0232558	1	0.120482	0.224138	0.0454545	0.0963855	0.532258	0.0340909	0.18543	0.166667	0.25	0.0963855	0.313433	0.13253	0.031746	0.0263158	0.298969	0.229508	0.139037	0.396825	0.0657895	0.0235294	0.0280374	0.0746269	0.0833333	0.106061	0.152778
KIRP_M174	0.340909	0.311111	0.267857	0.205882	0.0174419	0.0204082	0.532258	0.114286	0.166667	0.0694444	0.101449	1	0.037037	0.188406	0.154762	0.27907	0.118644	0.297872	0.128571	0.0377358	0.0327869	0.244444	0.276596	0.151163	0.431373	0.0819672	0.0285714	0.0344828	0.0769231	0.0846154	0.115385	0.192982
LUSC_M1707	0.285714	0.478261	0.210526	0.117647	0	0.04	0.368421	0.152174	0.133333	0.0612245	0.108696	0.27907	0.0350877	0.15493	0.2	1	0.108108	0.45	0.190476	0.0416667	0.0194175	0.275862	0.25	0.08	0.411765	0.0625	0.0444444	0.0606061	0.0947368	0.109091	0.142857	0.181818
OV_M1414	0.238095	0.571429	0.133333	0.142857	0.0645161	0.0416667	0.35	0.155556	0.137931	0.0625	0.0909091	0.2	0.0512821	0.15625	0.145161	0.45	0.0869565	1	0.263158	0.038961	0.0322581	0.2	0.259259	0.0833333	0.35	0.0333333	0.0377358	0.0454545	0.0729167	0.0714286	0.107143	0.190476
STAD_M257	0.3	0.444444	0.255814	0.137931	0	0.0232558	0.521739	0.126984	0.289474	0.0606061	0.169492	0.431373	0.0408163	0.190476	0.232877	0.411765	0.156863	0.305556	0.194444	0.0289855	0.037037	0.316456	0.292683	0.140625	1	0.0925926	0.031746	0.06	0.0990991	0.128571	0.133333	0.173077
BLCA_M555	1	0.28	0.173913	0.233333	0	0.233333	0.178571	0.15625	0.169811	0.0681818	0.0819672	0.242424	0.269231	0.409091	0.294118	0.306122	0.333333	0.275862	0.230769	0.111111	0.0576923	0.113208	0.333333	0.272727	0.382353	0.0625	0.111111	0.047619	0.32	0.304348	0.04	0.133333
BRCA_M435	0.28	1	0.132075	0.26087	0.0434783	0.0833333	0.25	0.208333	0.108108	0.0952381	0.129032	0.178571	0.234043	0.352941	0.294118	0.24	0.263158	0.380952	0.217391	0.0454545	0.0645161	0.0625	0.222222	0.368421	0.4375	0.0483871	0.0615385	0.0588235	0.470588	0.24	0.0909091	0.0540541
LIHC_M1152	0.409091	0.352941	0.125	0.12	0	0.0769231	0.142857	0.166667	0.0714286	0.0857143	0.133333	0.105263	0.1875	1	0.235294	0.2	0.4375	0.333333	0.145833	0.105263	0.0666667	0.136364	0.228571	0.315789	0.466667	0.0491803	0.1	0.0606061	0.333333	0.4	0.0606061	0.105263
MESO_M1252	0.294118	0.263158	0.111111	0.16	0.0434783	0.0740741	0.136364	0.16	0.1	0.0833333	0.129032	0.1	0.137931	0.4375	0.157895	0.148148	1	0.208333	0.0980392	0.1	0.0645161	0.108108	0.189189	0.181818	0.285714	0.0487805	0.0952381	0.0588235	0.190476	0.157895	0.0454545	0.0684932
OV_M1143	0.275862	0.380952	0.27451	0.259259	0	0.107143	0.304348	0.214286	0.113208	0.1	0.0810811	0.151515	0.235294	0.333333	0.35	0.386364	0.208333	1	0.244898	0.08	0.0555556	0.12	0.324324	0.347826	0.555556	0.0625	0.0714286	0.0512821	0.304348	0.227273	0.0652174	0.0921053
STAD_M1010	0.296296	0.35	0.145455	0.230769	0	0.115385	0.217391	0.230769	0.136364	0.135135	0.1875	0.16129	0.270833	0.444444	0.315789	0.36	0.296296	0.454545	0.229167	0.0869565	0.0810811	0.151515	0.236842	0.321429	1	0.0461538	0.0833333	0.0540541	0.272727	0.190476	0.0681818	0.15
STAD_M1256	0.347826	0.4375	0.156863	0.272727	0	0.0869565	0.263158	0.272727	0.0714286	0.117647	0.0967742	0.185185	0.23913	0.466667	0.3125	0.363636	0.291667	0.555556	0.222222	0.105263	0.0666667	0.133333	0.264706	0.388889	1	0.05	0.0689655	0.0606061	0.333333	0.235294	0.075	0.105263
UCEC_M791	0.32	0.470588	0.109091	0.2	0	0.0714286	0.3	0.153846	0.105263	0.0555556	0.125	0.214286	0.204082	0.333333	0.229167	0.333333	0.222222	0.304348	0.212766	0.0769231	0.0625	0.12	0.216216	0.285714	0.333333	0.04	0.0487805	0.0571429	1	0.185185	0.0571429	0.1
BLCA_M710	1	0.272727	0.166667	0.0425532	0.0652174	0.0740741	0.55	0.0347826	0.184211	0.272727	0.0961538	0.151515	0.06	0.387097	0.272727	0.35	0.125	0.361111	0.0952381	0.0921053	0.05	0.2	0.3125	0.375	0.28	0.0333333	0.0769231	0.0357143	0.037037	0.291667	0.0652174	0.0384615
BRCA_M728	0.272727	1	0.0909091	0.0952381	0.131579	0.0952381	0.470588	0.0714286	0.12	0.157895	0.0724638	0.15	0.030303	0.230769	0.210526	0.3125	0.3125	0.363636	0.166667	0.0666667	0.0434783	0.2	0.333333	0.421053	0.172414	0.0869565	0.0952381	0.0425532	0.0384615	0.315789	0.075	0.0869565
ESCA_M189	0.55	0.470588	0.190476	0.0689655	0.0952381	0.0454545	1	0.0645161	0.148148	0.315789	0.08	0.166667	0.0638298	0.333333	0.315789	0.411765	0.263158	0.5	0.107143	0.0606061	0.0540541	0.173913	0.344828	0.578947	0.318182	0.0769231	0.0869565	0.04	0.0416667	0.333333	0.0697674	0.0740741
LUSC_M1740	0.35	0.3125	0.235294	0.157895	0.105263	0.1	0.411765	0.037037	0.0869565	0.3125	0.0638298	0.222222	0.0697674	0.347826	0.3125	1	0.176471	0.272727	0.173913	0.107143	0.0606061	0.235294	0.4	0.666667	0.25	0.0568182	0.105263	0.0416667	0.0263158	0.2	0.105263	0.0909091
OV_M1472	0.333333	0.363636	0.136986	0.107143	0.159091	0.0689655	0.5	0.0555556	0.125	0.153846	0.134615	0.107143	0.05	0.25	0.24	0.26087	0.26087	1	0.0909091	0.0897436	0.0740741	0.28	0.333333	0.4	0.2	0.1	0.0689655	0.0425532	0.0344828	0.222222	0.0851064	0.0645161
OV_M809	0.361111	0.228571	0.185185	0.0731707	0.142857	0.0491803	0.4375	0.0408163	0.153846	0.162162	0.16129	0.104167	0.0461538	0.288889	0.222222	0.272727	0.235294	1	0.0892857	0.113636	0.05	0.253521	0.390244	0.333333	0.205128	0.0952381	0.0487805	0.0458716	0.0322581	0.265625	0.0666667	0.0454545
SKCM_M1037	0.285714	0.4	0.166667	0.157895	0.135135	0.1	0.5	0.0740741	0.0952381	0.235294	0.111111	0.222222	0.0697674	0.291667	0.235294	0.666667	0.25	0.318182	0.125	0.107143	0.0606061	0.166667	0.4	1	0.190476	0.0909091	0.105263	0.0434783	0.0322581	0.18	0.0769231	0.0909091
SKCM_M358	0.375	0.421053	0.126761	0.12	0.142857	0.0769231	0.578947	0.0606061	0.1	0.227273	0.0980392	0.166667	0.0612245	0.321429	0.217391	0.529412	0.238095	0.4	0.137931	0.0882353	0.0512821	0.16	0.366667	1	0.181818	0.0714286	0.08	0.0384615	0.0294118	0.25	0.0909091	0.0714286
BRCA_M688	0.128205	1	0.285714	0.0454545	0.333333	0.0666667	0.352941	0.190476	0.111111	0.142857	0.0465116	0.1	0.241379	0.0454545	0.4	0.258065	0.0869565	0.423077	0.210526	0.129032	0.047619	0.222222	0.106383	0.125	0.346154	0.0487805	0.0416667	0.047619	0.0952381	0.171429	0.0322581	0.103448
COAD_M490	0.1	0.333333	0.227273	0.037037	1	0	0.4375	0.136364	0.0869565	0.111111	0.0384615	0.0470588	0.0540541	0.0416667	0.272727	0.21875	0.0869565	0.275862	0.2	0.09375	0.0454545	0.166667	0.106383	0.0588235	0.296296	0.0454545	0.028169	0.047619	0.027027	0.171429	0.0206186	0.103448
ESCA_M1210	0.102564	0.352941	0.3	0.0454545	0.4375	0.019802	1	0.142857	0.0888889	0.114286	0.0833333	0.0952381	0.166667	0.0526316	0.35	0.310345	0.0909091	0.44	0.352941	0.0967742	0.0458716	0.166667	0.108696	0.09375	0.36	0.105263	0.04	0.05	0.1	0.212121	0.047619	0.107143
LUAD_M279	0.116279	0.4	0.291667	0.0487805	0.32	0	0.35	0.216216	0.148936	0.189189	0.107143	0.107143	0.25	0.0655738	1	0.34375	0.115385	0.464286	0.272727	0.0833333	0.0438596	0.181818	0.12	0.0810811	0.444444	0.0465116	0.0357143	0.04	0.08	0.216216	0.0384615	0.125
LUSC_M527	0.113208	0.258065	0.272727	0.0273973	0.257143	0.025	0.310345	0.244444	0.160714	0.122449	0.0833333	0.0810811	0.214286	0.0743802	0.34375	1	0.0810811	0.485714	0.181818	0.0869565	0.05	0.121212	0.116667	0.0851064	0.315789	0.0465116	0.0277778	0.0555556	0.0857143	0.217391	0.0454545	0.119048
OV_M1166	0.117647	0.423077	0.290323	0.037037	0.3125	0.0465116	0.44	0.285714	0.145455	0.152174	0.0810811	0.1	0.225	0.0882353	0.464286	0.485714	0.0857143	1	0.275862	0.0909091	0.0406504	0.129032	0.12069	0.195122	0.454545	0.0606061	0.027027	0.0285714	0.0588235	0.285714	0.0285714	0.097561
OV_M622	0.084507	0.23913	0.232143	0.027027	0.192308	0.031746	0.244444	0.193548	0.169014	0.106061	0.0555556	0.0714286	0.169492	0.0724638	0.270833	0.411765	0.0943396	1	0.191489	0.0925926	0.034965	0.0987654	0.103896	0.131148	0.283019	0.0576923	0.0185185	0.037037	0.0769231	0.253165	0.0491803	0.0833333
STAD_M62	0.0784314	0.346154	0.236842	0.0416667	0.333333	0.0263158	0.36	0.155556	0.150943	0.133333	0.0588235	0.122449	0.236842	0.0677966	0.444444	0.315789	0.0909091	0.454545	0.214286	0.0952381	0.0413223	0.137931	0.0862069	0.175	1	0.1	0.0285714	0.0285714	0.0625	0.262295	0.0280374	0.1
BRCA_M781	0.09375	1	0.322581	0.0789474	0.025641	0.0307692	0.36	0.325	0.233333	0.0851064	0.125	0.0909091	0.166667	0.25	0.129032	0.16129	0.0888889	0.213333	0.0909091	0.0350877	0.0277778	0.225806	0.366667	0.309524	0.413793	0.0625	0.0333333	0.0588235	0.0359712	0.333333	0.0294118	0.290323
CESC_M1368	0	0.291667	1	0.047619	0.037037	0.04	0.571429	0.294118	0.470588	0.0540541	0.0625	0.0444444	0.0714286	0.137931	0.0512821	0.0138889	0.0886076	0.428571	0.0909091	0.0454545	0	0.230769	0.318182	0.30303	0.45	0.0833333	0.0454545	0.0434783	0.0393701	0.185185	0.0344828	0.217391
CESC_M679	0	0.322581	1	0.0357143	0.1	0.0333333	0.0384615	0.314286	0.363636	0.0833333	0.0566038	0.16	0.135135	0.117647	0.0454545	0.0134228	0.0833333	0.458333	0.101695	0.0689655	0.0425532	0.321429	0.259259	0.371429	0.619048	0.0810811	0.037037	0.0357143	0.0378788	0.15625	0.0294118	0.178571
ESCA_M201	0.0263158	0.380952	0.571429	0.047619	0	0.0434783	1	0.344828	0.4375	0.0571429	0.0652174	0.047619	0.12	0.192308	0.105263	0.1	0.0909091	0.333333	0.0943396	0.0454545	0.0333333	0.25	0.35	0.205882	0.615385	0.0882353	0.05	0.047619	0.04	0.25	0.037037	0.3
HNSC_M766	0	0.28	0.470588	0.0454545	0.0357143	0.0235294	0.4375	0.277778	1	0.0526316	0.0434783	0.0434783	0.117647	0.214286	0.0909091	0.0416667	0.0609756	0.347826	0.0892857	0.0416667	0.0217391	0.222222	0.363636	0.189189	0.411765	0.111111	0.0434783	0.0416667	0.0390625	0.178571	0.0333333	0.208333
OV_M471	0.0357143	0.233333	0.458333	0.0625	0.0625	0.025	0.333333	0.27027	0.347826	0.0714286	0.0740741	0.0555556	0.131579	0.181818	0.115385	0.0714286	0.0697674	1	0.1	0.0666667	0.0416667	0.266667	0.25	0.289474	0.346154	0.097561	0.0666667	0.0645161	0.037594	0.151515	0.0277778	0.172414
STAD_M1015	0.0394737	0.304348	0.4375	0.05	0.0384615	0.047619	0.615385	0.333333	0.411765	0.0857143	0.0638298	0.0454545	0.208333	0.142857	0.0285714	0.15	0.0625	0.26087	0.113208	0.0454545	0.0285714	0.24	0.217391	0.235294	1	0.0555556	0.047619	0.0454545	0.0357143	0.192308	0.0357143	0.173913
STAD_M550	0.0365854	0.413793	0.619048	0.0357143	0.1	0.0333333	0.5	0.393939	0.363636	0.0833333	0.0769231	0.16	0.166667	0.117647	0.0487805	0.26087	0.0705882	0.346154	0.101695	0.0357143	0.0425532	0.37037	0.259259	0.371429	1	0.0810811	0.037037	0.0357143	0.03125	0.15625	0.0294118	0.178571
CESC_M523	0.145161	0.2	1	0.0454545	0.0333333	0.0677966	0.35	0.173913	0.130435	0.0833333	0.16	0.0769231	0.0638298	0.159091	0.307692	0.32	0.217391	0.269231	0.111111	0.0952381	0.0666667	0.285714	0.137931	0.137931	0.409091	0.0465116	0.0454545	0.0454545	0.310345	0.272727	0.0384615	0.0740741
ESCA_M1249	0.180328	0.21875	0.35	0.0434783	0.03125	0.0847458	1	0.217391	0.125	0.104167	0.25	0.208333	0.0625	0.181818	0.521739	0.36	0.208333	0.36	0.107143	0.0909091	0.08	0.193548	0.133333	0.259259	0.454545	0.0869565	0.0434783	0.0434783	0.258065	0.34375	0.0714286	0.111111
LUAD_M1280	0.24	0.277778	0.307692	0.030303	0	0.0757576	0.521739	0.25	0.103896	0.153846	0.193548	0.16129	0.0810811	0.204082	1	0.518519	0.285714	0.322581	0.0857143	0.107143	0.0625	0.222222	0.205882	0.205882	0.444444	0.0666667	0.0363636	0.0333333	0.352941	0.428571	0.0571429	0.155172
LUSC_M1397	0.3	0.217391	0.272727	0.025	0.0666667	0.0675676	0.34375	0.232558	0.135135	0.133333	0.125	0.128205	0.0689655	0.240741	0.470588	1	0.294118	0.324324	0.0697674	0.117647	0.05	0.209302	0.289474	0.139535	0.424242	0.0526316	0.0263158	0.0263158	0.317073	0.380952	0.0263158	0.171875
LUSC_M1836	0.304348	0.216216	0.32	0.0322581	0.0263158	0.0769231	0.36	0.307692	0.178571	0.134615	0.16129	0.09375	0.0833333	0.208333	0.518519	1	0.296296	0.333333	0.0882353	0.111111	0.0645161	0.228571	0.333333	0.142857	0.407407	0.0689655	0.0344828	0.0344828	0.285714	0.324324	0.0344828	0.157895
OV_M1267	0.181818	0.125	0.269231	0.0344828	0.0833333	0.0606061	0.36	0.172414	0.12	0.0727273	0.125	0.166667	0.0540541	0.21875	0.322581	0.333333	0.166667	1	0.0666667	0.0909091	0.0645161	0.194444	0.111111	0.176471	0.461538	0.0689655	0.0540541	0.0344828	0.184211	0.324324	0.0344828	0.118644
STAD_M278	0.1875	0.166667	0.409091	0.0344828	0.0882353	0.0793651	0.454545	0.230769	0.123288	0.0961538	0.172414	0.178571	0.0576923	0.244444	0.444444	0.424242	0.269231	0.461538	0.09375	0.0967742	0.0769231	0.242424	0.151515	0.225806	1	0.115385	0.030303	0.0487805	0.228571	0.342857	0.0163043	0.142857
UCS_M1031	0.359375	0.255814	0.272727	0.0540541	0.0909091	0.0675676	0.34375	0.162162	0.0918367	0.133333	0.153846	0.257143	0.0909091	0.175439	0.428571	0.380952	0.257143	0.384615	0.075	0.125	0.05	0.181818	0.195122	0.225	0.342857	0.075	0.031746	0.0263158	0.384615	1	0.0232558	0.170732
BLCA_M1209	1	0.115385	0.4	0.133333	0.0416667	0.047619	0.375	0.047619	0.4	0.0952381	0.0769231	0.0454545	0.2	0.0769231	0.625	0.163934	0.107143	0.272727	0.0434783	0.137931	0.0571429	0.130435	0.411765	0.15	0.25	0.0740741	0.0689655	0.0666667	0.0363636	0.115385	0.0714286	0.05
BLCA_M523	1	0.0882353	0.5	0.105263	0.0512821	0.0549451	0.304348	0.0462963	0.5	0.0857143	0.0588235	0.037037	0.142857	0.111111	0.619048	0.277778	0.0833333	0.333333	0.103448	0.115385	0.0465116	0.0967742	0.392857	0.233333	0.12766	0.0571429	0.0540541	0.0526316	0.0731707	0.121212	0.0555556	0.0740741
CESC_M477	0.5	0.121212	1	0.105263	0.0512821	0.0549451	0.304348	0.0909091	0.392857	0.0714286	0.0588235	0.0689655	0.103448	0.111111	0.545455	0.253968	0.0740741	0.285714	0.103448	0.171429	0.0714286	0.121951	0.333333	0.193548	0.166667	0.0571429	0.0333333	0.0555556	0.037037	0.15625	0.0454545	0.0740741
HNSC_M411	0.5	0.0526316	0.392857	0.0714286	0.0731707	0.0531915	0.375	0.0833333	1	0.0666667	0.0833333	0.03125	0.0609756	0.12766	0.321429	0.289474	0.03125	0.21875	0.1	0.1	0.0142857	0.0888889	0.206897	0.142857	0.192308	0.111111	0.030303	0.025	0.0625	0.111111	0.0263158	0.0909091
LUAD_M133	0.625	0.129032	0.545455	0.111111	0.0517241	0.0444444	0.333333	0.0625	0.35	0.0909091	0.0625	0.0740741	0.153846	0.0909091	1	0.222222	0.0882353	0.36	0.0967742	0.125	0.0487805	0.128205	0.48	0.206897	0.181818	0.0606061	0.0571429	0.0588235	0.0769231	0.129032	0.0588235	0.08
SARC_M1165	0.411765	0.222222	0.333333	0.117647	0.0357143	0.0337079	0.368421	0.0444444	0.333333	0.0416667	0.0666667	0.04	0.166667	0.0697674	0.428571	0.238095	0.09375	0.230769	0.0869565	0.121212	0.0512821	0.135135	1	0.162162	0.263158	0.0645161	0.0606061	0.0588235	0.04	0.0645161	0.0625	0.0483871
SARC_M408	0.392857	0.176471	0.3	0.097561	0.03125	0.0421053	0.269231	0.047619	0.24	0.138889	0.0540541	0.0350877	0.129032	0.0625	0.48	0.205882	0.0789474	0.258065	0.0666667	0.185185	0.0434783	0.113636	1	0.142857	0.117647	0.0625	0.05	0.0487805	0.146341	0.0526316	0.0512821	0.0434783
BLCA_M146	1	0.25	0.407407	0.0740741	0	0.0617284	0.15625	0.147059	0.1875	0.0666667	0.0588235	0.153846	0.0512821	0.172414	0.44	0.384615	0.142857	0.311111	0.0645161	0.0625	0.321429	0.193548	0.153846	0.193548	0.179487	0.0740741	0.0625	0.0754717	0.103448	0.12	0.09375	0.16
CESC_M562	0.407407	0.363636	1	0.0666667	0.03125	0.121212	0.259259	0.181818	0.333333	0.0666667	0.114286	0.184211	0.0512821	0.259259	0.44	0.5	0.28	0.45	0.0666667	0.0967742	0.423077	0.233333	0.25	0.233333	0.322581	0.1	0.0526316	0.0961538	0.230769	0.2	0.166667	0.171429
LUAD_M83	0.44	0.333333	0.44	0.0681818	0.08	0.09375	0.166667	0.0882353	0.183673	0.0714286	0.0606061	0.131579	0.0540541	0.142857	1	0.416667	0.111111	0.357143	0.0344828	0.0384615	0.296296	0.129032	0.166667	0.152174	0.157895	0.08	0.0666667	0.0384615	0.2	0.12	0.137931	0.181818
LUSC_M1086	0.24	0.277778	0.347826	0.0952381	0.027027	0.0714286	0.285714	0.185185	0.192308	0.0869565	0.103448	0.0714286	0.0625	0.125	0.26087	1	0.315789	0.466667	0.0416667	0.04	0.304348	0.210526	0.0952381	0.153846	0.259259	0.0689655	0.0434783	0.0740741	0.25	0.15	0.272727	0.103448
LUSC_M422	0.384615	0.333333	0.5	0.0769231	0	0.0714286	0.230769	0.15625	0.285714	0.0714286	0.0882353	0.102564	0.0540541	0.142857	0.416667	1	0.25	0.421053	0.0714286	0.0384615	0.4	0.25	0.217391	0.206897	0.3	0.125	0.0357143	0.0625	0.2	0.166667	0.269231	0.0909091
OV_M1314	0.26087	0.4	0.45	0.0606061	0	0.0769231	0.315789	0.153846	0.159091	0.0952381	0.111111	0.0689655	0.0666667	0.0930233	0.285714	0.466667	0.210526	1	0.04	0.0416667	0.217391	0.166667	0.105263	0.217391	0.15625	0.0526316	0.0526316	0.08	0.277778	0.111111	0.238095	0.176471
PRAD_M627	0.321429	0.26087	0.423077	0.0769231	0	0.0689655	0.178571	0.151515	0.204082	0.0344828	0.0857143	0.157895	0.0526316	0.222222	0.296296	0.4	0.192308	0.217391	0.0434783	0.0645161	1	0.241379	0.115385	0.125	0.290323	0.0882353	0.0540541	0.0606061	0.192308	0.16	0.0625	0.142857
BLCA_M188	1	0.318841	0.295775	0.121693	0.253731	0.0819672	0.554054	0.231884	0.393939	0.144444	0.0967742	0.0967742	0.191176	0.211268	0.197917	0.555556	0.220183	0.547945	0.137931	0.0394737	0.342857	0.191781	0.169492	0.146789	0.292308	0.0583333	0.0327103	0.025641	0.122449	0.259259	0.0917431	0.149123
BRCA_M221	0.318841	1	0.340426	0.142012	0.236111	0.146341	0.28	0.181818	0.377358	0.162162	0.0888889	0.159091	0.192308	0.25	0.297297	0.360656	0.225806	0.424242	0.212121	0.0434783	0.363636	0.157895	0.121951	0.164835	0.382979	0.0365854	0.020202	0.0338983	0.151899	0.136842	0.0655738	0.154639
ESCA_M444	0.554054	0.28	0.279412	0.130208	0.253659	0.05	1	0.25	0.385714	0.148936	0.0895522	0.104478	0.211268	0.197368	0.22449	0.455556	0.232143	0.45679	0.130435	0.0454545	0.253165	0.176471	0.15625	0.160714	0.308824	0.047619	0.0226244	0.0240964	0.105769	0.229885	0.0782609	0.123967
HNSC_M137	0.393939	0.377358	0.396226	0.114943	0.267606	0.0909091	0.385714	0.179487	1	0.118421	0.111111	0.136364	0.235294	0.214286	0.25974	0.4	0.210526	0.461538	0.157143	0.047619	0.333333	0.193548	0.108696	0.175824	0.32	0.0361446	0.0304569	0.0188679	0.121951	0.191489	0.0631579	0.153061
LUSC_M124	0.555556	0.3375	0.37234	0.2	0.333333	0.0933333	0.455556	0.298969	0.384615	0.19802	0.0769231	0.0909091	0.24359	0.186047	0.271845	1	0.262712	0.517544	0.185567	0.040404	0.264368	0.219653	0.118421	0.165746	0.265823	0.0592593	0.0366972	0.0359712	0.115044	0.216495	0.0989011	0.195122
OV_M489	0.365217	0.266055	0.355932	0.182648	0.37156	0.0660377	0.317073	0.266129	0.287037	0.169231	0.0635838	0.0747664	0.196262	0.115385	0.275591	0.517544	0.258741	1	0.15873	0.0387597	0.236842	0.241026	0.135922	0.19802	0.224299	0.0481928	0.0307692	0.0416667	0.121429	0.208333	0.0993377	0.219178
OV_M777	0.547945	0.424242	0.319444	0.137566	0.233333	0.078125	0.45679	0.241758	0.461538	0.139785	0.0923077	0.0923077	0.183099	0.2	0.268817	0.5	0.247706	1	0.146067	0.0465116	0.347222	0.171598	0.133333	0.196262	0.318182	0.04	0.0322581	0.0246914	0.141414	0.222222	0.0990991	0.155172
BLCA_M227	1	0.111111	0.378378	0.128205	0.0909091	0.0465116	0.3125	0.0810811	0.461538	0.0638298	0.0434783	0.0789474	0.0588235	0.1875	0.375	0.377778	0.164384	0.28169	0.0625	0.0576923	0.0731707	0.0909091	0.0655738	0.0526316	0.266667	0.0283019	0.027027	0.038961	0.111111	0.0408163	0.037037	0.0909091
BLCA_M873	1	0.113636	0.3	0.185185	0.09375	0.037037	0.428571	0.12	0.363636	0.0857143	0.0384615	0.0625	0.0769231	0.130435	0.52381	0.315789	0.177419	0.227273	0.0545455	0.0740741	0.103448	0.0909091	0.0816327	0.0441176	0.368421	0.0357143	0.04	0.0183486	0.166667	0.0289855	0.047619	0.0714286
CESC_M82	0.378378	0.105263	1	0.0833333	0.1	0.0588235	0.48	0.0625	0.529412	0.097561	0.0512821	0.0909091	0.0882353	0.375	0.344828	0.23913	0.235294	0.307692	0.0666667	0.0638298	0.0625	0.0833333	0.0384615	0.0555556	0.222222	0.0392157	0.0645161	0.0416667	0.129032	0.0952381	0.0263158	0.0576923
ESCA_M406	0.428571	0.129412	0.48	0.111111	0.0952381	0.0645161	1	0.0869565	0.34375	0.125	0.0394737	0.04	0.0606061	0.333333	0.428571	0.230769	0.137931	0.388889	0.0566038	0.0666667	0.0869565	0.0697674	0.0714286	0.0740741	0.5	0.0555556	0.0434783	0.0143885	0.181818	0.0571429	0.0416667	0.0697674
HNSC_M153	0.461538	0.0882353	0.529412	0.12963	0.0701754	0.05	0.34375	0.0652174	1	0.0625	0.0428571	0.0769231	0.075	0.344828	0.285714	0.340426	0.2	0.226667	0.0512821	0.0566038	0.0526316	0.0701754	0.0588235	0.0512821	0.181818	0.037037	0.031746	0.0384615	0.108108	0.0833333	0.0754717	0.0701754
LUAD_M388	0.52381	0.126437	0.344828	0.142857	0.116279	0.0645161	0.428571	0.0769231	0.285714	0.0857143	0.0384615	0.0740741	0.0606061	0.181818	1	0.25	0.140625	0.35	0.0714286	0.0625	0.08	0.0909091	0.0444444	0.0597015	0.368421	0.0526316	0.0487805	0.03125	0.166667	0.0298507	0.0384615	0.0714286
STAD_M115	0.368421	0.108434	0.222222	0.130435	0.0285714	0.0384615	0.5	0.105263	0.181818	0.0571429	0.04	0.0344828	0.0384615	0.111111	0.368421	0.157895	0.115385	0.166667	0.0612245	0.047619	0.105263	0.105263	0.0512821	0.0483871	1	0.0625	0.0277778	0.025	0.1	0.0454545	0.0454545	0.05
BRCA_M212	0.0344828	1	0.206897	0.178571	0.0344828	0.037037	0.21875	0.125	0.384615	0.173913	0.037037	0.1	0.272727	0.347826	0.458333	0.4	0.357143	0.434783	0.0625	0.037037	0.0384615	0.304348	0.2	0.137931	0.391304	0.0555556	0.037037	0.0277778	0.192308	0.217391	0.0350877	0.0816327
LUAD_M106	0.0340909	0.458333	0.20339	0.115385	0.0333333	0.0357143	0.290323	0.121212	0.37037	0.20339	0.0363636	0.135593	0.212766	0.333333	1	0.565217	0.444444	0.416667	0.0615385	0.0357143	0.031746	0.47619	0.32	0.172414	0.434783	0.0322581	0.0365854	0.0322581	0.235294	0.208333	0.0588235	0.0588235
LUSC_M521	0.0571429	0.4	0.191489	0.208333	0.0333333	0.0357143	0.290323	0.121212	0.321429	0.166667	0.0555556	0.116667	0.212766	0.333333	0.565217	1	0.344828	0.36	0.0615385	0.0357143	0.031746	0.347826	0.269231	0.21875	0.434783	0.0322581	0.0645161	0.0322581	0.166667	0.208333	0.0357143	0.08
MESO_M134	0.0465116	0.357143	0.233333	0.142857	0.030303	0.0333333	0.264706	0.0930233	0.37931	0.193548	0.0344828	0.111111	0.2	0.296296	0.444444	0.344828	1	0.48	0.0434783	0.0322581	0.030303	0.307692	0.241379	0.15625	0.285714	0.0322581	0.0352941	0.03125	0.222222	0.28	0.0327869	0.0754717
OV_M1012	0.030303	0.434783	0.169492	0.125	0	0.04	0.225806	0.09375	0.346154	0.15	0.0377358	0.12069	0.170213	0.304348	0.416667	0.36	0.48	1	0.04	0.0384615	0.0392157	0.318182	0.205882	0.15625	0.47619	0.0344828	0.0384615	0.0344828	0.196078	0.285714	0.0384615	0.0612245
READ_M1145	0.0361446	0.304348	0.118644	0.115385	0	0.0434783	0.166667	0.185185	0.28	0.157895	0.0434783	0.107143	0.181818	0.285714	0.47619	0.347826	0.307692	0.318182	0.0491803	0.0171429	0.0150376	1	0.333333	0.172414	0.4	0.0100671	0.0434783	0.04	0.16	0.142857	0.0377358	0.0454545
STAD_M73	0.0263158	0.391304	0.177778	0.181818	0.037037	0.0289855	0.321429	0.0967742	0.259259	0.114754	0.04	0.122807	0.148936	0.318182	0.434783	0.434783	0.285714	0.47619	0.0416667	0.0333333	0.04	0.4	0.290323	0.2	1	0.0322581	0.0344828	0.0357143	0.176471	0.238095	0.0133929	0.0851064
BRCA_M271	0.262295	1	0.371429	0.0930233	0.227273	0.0465116	0.366667	0.28	0.258065	0.2	0.09375	0.241379	0.0967742	0.325	0.121951	0.352941	0.0526316	0.111111	0.0526316	0.075	0.535714	0.173913	0.16129	0.0725806	0.3	0.0804598	0.030303	0.0588235	0.0419162	0.189655	0.0588235	0.103448
CESC_M162	0.246154	0.371429	1	0.101124	0.208333	0.0454545	0.285714	0.244444	0.433333	0.212121	0.0540541	0.176471	0.130435	0.390244	0.136364	0.388889	0.0612245	0.166667	0.0632911	0.0740741	0.46875	0.26087	0.212121	0.096	0.264706	0.0769231	0.0357143	0.032967	0.0532544	0.258621	0.0784314	0.0909091
ESCA_M1244	0.28	0.366667	0.285714	0.0714286	0.133333	0.05	1	0.225	0.16129	0.178571	0.0555556	0.222222	0.153846	0.25	0.111111	0.30303	0.0659341	0.1	0.0405405	0.0408163	0.428571	0.214286	0.222222	0.0483871	0.285714	0.045977	0.0333333	0.0333333	0.0392157	0.153846	0.0645161	0.115385
HNSC_M700	0.228571	0.258065	0.433333	0.0606061	0.195122	0.0526316	0.16129	0.175	1	0.24	0.037037	0.148148	0.16	0.263158	0.115385	0.28125	0.043956	0.171875	0.0416667	0.0517241	0.357143	0.195122	0.192308	0.0689655	0.214286	0.0722892	0.0357143	0.0526316	0.0540541	0.185185	0.0697674	0.111111
LIHC_M137	0.211268	0.325	0.390244	0.0957447	0.188679	0.0384615	0.25	0.171429	0.263158	0.191489	0.0447761	0.184211	0.131579	1	0.145833	0.309524	0.0582524	0.141026	0.133333	0.138889	0.444444	0.211538	0.153846	0.126984	0.230769	0.0729167	0.111111	0.0465116	0.0517241	0.2	0.0735294	0.0882353
LUSC_M491	0.253968	0.352941	0.388889	0.105263	0.205882	0.0487805	0.30303	0.307692	0.333333	0.1875	0.0625	0.151515	0.125	0.309524	0.170732	1	0.0967742	0.188406	0.0649351	0.0625	0.451613	0.191489	0.1875	0.0887097	0.28125	0.0909091	0.0375	0.0337079	0.0697674	0.2	0.06	0.114286
PRAD_M302	0.259259	0.535714	0.46875	0.0813953	0.232558	0.047619	0.428571	0.347826	0.357143	0.25	0.0625	0.206897	0.137931	0.444444	0.0714286	0.451613	0.0511364	0.161765	0.0675676	0.0483871	1	0.292683	0.25	0.0731707	0.266667	0.0813953	0.03125	0.0190476	0.075	0.172414	0.0606061	0.148148
BRCA_M591	0.166667	1	0.16	0.0869565	0.0434783	0.12	0.444444	0.148148	0.209302	0.05	0.0810811	0.0769231	0.153846	0.190476	0.333333	0.5	0.107143	0.304348	0.137931	0.0851064	0.0810811	0.148148	0.3	0.0877193	0.35	0.0769231	0.0434783	0.0517241	0.138889	0.368421	0.0909091	0.190476
ESCA_M1182	0.178571	0.444444	0.227273	0.15	0.0434783	0.130435	1	0.16	0.162791	0.0571429	0.117647	0.114286	0.166667	0.210526	0.304348	0.466667	0.0740741	0.217391	0.148148	0.09375	0.12	0.208333	0.263158	0.111111	0.315789	0.0833333	0	0.047619	0.147059	0.333333	0.0909091	0.210526
LUAD_M201	0.147059	0.333333	0.178571	0.0740741	0.0392157	0.0851064	0.304348	0.129032	0.217391	0.0555556	0.0819672	0.0714286	0.121212	0.26087	1	0.56	0.097561	0.285714	0.15625	0.1	0.107143	0.206897	0.25	0.137931	0.347826	0.0666667	0.0416667	0.0483871	0.125	0.2	0.0714286	0.115385
LUSC_M1158	0.166667	0.4	0.2	0.0869565	0.037037	0.09375	0.32	0.117647	0.229167	0.0512821	0.112903	0.116279	0.142857	0.185185	0.56	1	0.117647	0.3	0.142857	0.115385	0.12069	0.166667	0.222222	0.131148	0.416667	0.0606061	0.0444444	0.0465116	0.116279	0.178571	0.0675676	0.142857
LUSC_M1758	0.148148	0.5	0.190476	0.0833333	0	0.142857	0.466667	0.173913	0.142857	0.0714286	0.0769231	0.0909091	0.130435	0.235294	0.333333	1	0.08	0.3	0.16	0.0681818	0.102041	0.173913	0.294118	0.115385	0.4375	0.0909091	0.0588235	0.0526316	0.15625	0.294118	0.1	0.235294
LUSC_M467	0.307692	0.294118	0.164384	0.0807453	0.031746	0.0862069	0.25	0.142857	0.214286	0.0465116	0.164179	0.14	0.15	0.146341	0.411765	1	0.236842	0.283333	0.12	0.121212	0.170732	0.189189	0.177778	0.164179	0.30303	0.047619	0.037037	0.0487805	0.106061	0.166667	0.076087	0.108108
STAD_M42	0.259259	0.35	0.272727	0.135135	0.0454545	0.08	0.315789	0.111111	0.243902	0.0645161	0.109091	0.111111	0.15	0.159091	0.347826	0.4375	0.153846	0.26087	0.166667	0.136364	0.14	0.125	0.285714	0.12963	1	0.08	0.0357143	0.0571429	0.142857	0.25	0.0869565	0.2
BRCA_M763	0.28125	1	0.2	0.121212	0.030303	0.037037	0.272727	0.137931	0.272727	0.0555556	0.4	0.0851064	0.0344828	0.166667	0.176471	0.52	0.0843373	0.458333	0.166667	0.111111	0.0555556	0.0714286	0.444444	0.0701754	0.285714	0.0384615	0.0833333	0.08	0.08	0.0740741	0.166667	0.130435
ESCA_M178	0.3	0.350649	0.245283	0.1	0	0.106383	1	0.177778	0.209302	0.0689655	0.157895	0.102941	0.113208	0.254237	0.207547	0.508475	0.145161	0.272727	0.134615	0.166667	0.0384615	0.209302	0.25	0.15	0.285714	0.0603448	0.0638298	0.0769231	0.133333	0.178571	0.130435	0.111111
LUSC_M1154	0.236842	0.52	0.297297	0.0833333	0.025641	0.133333	0.409091	0.147059	0.133333	0.047619	0.307692	0.0961538	0.0789474	0.166667	0.179487	1	0.0786517	0.413793	0.138889	0.0909091	0.047619	0.0833333	0.333333	0.08	0.178571	0.039604	0.0666667	0.05	0.1	0.09375	0.133333	0.16129
LUSC_M466	0.345455	0.361446	0.271186	0.164179	0	0.109091	0.508475	0.236559	0.22	0.0757576	0.168675	0.0909091	0.152542	0.220588	0.327273	1	0.15942	0.295082	0.152542	0.207792	0.0540541	0.173077	0.204082	0.167568	0.358491	0.056	0.0535714	0.0833333	0.111111	0.171875	0.138298	0.105263
OV_M1159	0.128205	0.458333	0.184211	0.0888889	0.0322581	0.0689655	0.204082	0.0789474	0.0689655	0.0512821	0.24	0.08	0.03125	0.107143	0.075	0.413793	0.0568182	1	0.0606061	0.1	0.0512821	0.0645161	0.208333	0.0449438	0.142857	0.0322581	0.0740741	0.0540541	0.0714286	0.0571429	0.148148	0.137931
OV_M618	0.222222	0.4375	0.212121	0.0925926	0.0273973	0.05	0.272727	0.0930233	0.166667	0.04	0.2	0.0833333	0.0425532	0.142857	0.148936	0.405405	0.0833333	1	0.0888889	0.0882353	0.04	0.0666667	0.290323	0.0706522	0.171429	0.0272727	0.0526316	0.0512821	0.0512821	0.0769231	0.105263	0.1
SARC_M164	0.25	0.444444	0.176471	0.0833333	0.037037	0.0289855	0.25	0.125	0.294118	0.0666667	0.222222	0.0465116	0.0526316	0.222222	0.133333	0.333333	0.0909091	0.290323	0.16	0.142857	0.0540541	0.12	1	0.0598802	0.235294	0.0176991	0.04	0.05	0.105263	0.1	0.157895	0.105263
BRCA_M917	0.348936	1	0.320158	0.249084	0.247525	0.127796	0.271186	0.322115	0.28821	0.289199	0.276276	0.393939	0.283843	0.330247	0.277551	0.324818	0.282116	0.381625	0.315789	0.403226	0.275362	0.230126	0.322476	0.278481	0.362319	0.333333	0.351111	0.114407	0.421687	0.34767	0.165165	0.189655
KIRP_M75	0.339921	0.393939	0.29927	0.260417	0.268519	0.129518	0.257812	0.296943	0.283401	0.347079	0.358663	1	0.269076	0.336283	0.288462	0.346154	0.320896	0.404762	0.325103	0.385768	0.265487	0.215385	0.35873	0.25969	0.351111	0.286385	0.341564	0.103586	0.39777	0.33557	0.178161	0.204771
OV_M38	0.33518	0.381625	0.300275	0.229299	0.227273	0.111732	0.254545	0.300813	0.273408	0.309148	0.266846	0.404762	0.284091	0.337079	0.247387	0.346535	0.303529	1	0.277778	0.403571	0.211765	0.202128	0.322581	0.254237	0.287402	0.278689	0.307116	0.0989011	0.4	0.332278	0.17027	0.207294
PCPG_M247	0.367601	0.403226	0.317647	0.284644	0.263682	0.112853	0.268908	0.325359	0.296943	0.352727	0.29003	0.385768	0.351598	0.365931	0.230469	0.332117	0.290404	0.403571	0.313043	1	0.242991	0.218107	0.364548	0.28692	0.290909	0.309278	0.342105	0.118143	0.441296	0.384615	0.214953	0.290657
UCEC_M1257	0.299383	0.386555	0.325	0.235741	0.275676	0.138514	0.285068	0.295	0.316038	0.282609	0.256039	0.380392	0.281106	0.28882	0.280172	0.339768	0.26087	0.378676	0.279188	0.400844	0.271795	0.235556	0.266234	0.310502	0.336683	0.318436	0.339535	0.129187	1	0.368821	0.188498	0.219931
UCEC_M397	0.32	0.421456	0.310219	0.232323	0.259091	0.128358	0.27451	0.282051	0.300813	0.29085	0.260504	0.374126	0.281124	0.302857	0.280303	0.328767	0.268409	0.377483	0.257511	0.412879	0.251082	0.222222	0.282738	0.28125	0.329004	0.289199	0.310757	0.111969	1	0.359322	0.186782	0.207317
UCEC_M939	0.328358	0.421687	0.330739	0.241993	0.280788	0.13522	0.288703	0.304147	0.323144	0.307958	0.273529	0.39777	0.290598	0.314371	0.294355	0.349091	0.279703	0.4	0.277778	0.441296	0.271028	0.232653	0.29375	0.290456	0.35514	0.306533	0.333333	0.119835	1	0.381295	0.196375	0.21865
CESC_M112	0.285714	0.301587	1	0.246914	0.224138	0.0291262	0.389381	0.0298507	0.471429	0.0606061	0.031746	0.0581395	0.0540541	0.370968	0.245614	0.625	0.298701	0.396694	0.121212	0.1	0.0283019	0.342105	0.295082	0.283333	0.328358	0.0609756	0.03125	0.0298507	0.224138	0.229508	0.0632911	0.3125
ESCA_M82	0.219048	0.216981	0.389381	0.193548	0.134615	0.02	1	0.0265487	0.339286	0.0353982	0.0285714	0.0615385	0.046729	0.2	0.113208	0.464286	0.245763	0.449664	0.0893855	0.0660377	0.0263158	0.241667	0.166667	0.256944	0.20354	0.0307692	0.0243902	0.0205128	0.12381	0.161905	0.0396825	0.277311
HNSC_M87	0.254237	0.315789	0.471429	0.189873	0.254902	0.0333333	0.339286	0.0353982	1	0.0481928	0.0357143	0.0632911	0.0597015	0.344828	0.207547	0.506849	0.409091	0.327869	0.110236	0.134615	0.0294118	0.357143	0.309091	0.186916	0.28125	0.0526316	0.047619	0.0333333	0.230769	0.259259	0.0694444	0.324324
LUSC_M216	0.294118	0.348485	0.625	0.255814	0.238095	0.0272727	0.464286	0.027027	0.506849	0.0547945	0.0285714	0.0537634	0.0746269	0.333333	0.21875	1	0.407895	0.491525	0.123188	0.123077	0.0306122	0.379747	0.283582	0.281818	0.315068	0.0561798	0.0319149	0.0179372	0.181818	0.242424	0.0581395	0.365854
LUSC_M761	0.38	0.320755	0.580645	0.236111	0.311111	0.0363636	0.36	0.0363636	0.358209	0.0740741	0.0392157	0.0465116	0.0645161	0.377358	0.311111	1	0.313433	0.381579	0.105691	0.102041	0.0333333	0.343284	0.296296	0.326531	0.4	0.0714286	0.04	0.0196078	0.255319	0.188679	0.0588235	0.328571
MESO_M133	0.20339	0.241379	0.298701	0.123457	0.244898	0.0350877	0.245763	0.0307692	0.409091	0.037037	0.0377358	0.0454545	0.0625	0.229508	0.196078	0.407895	1	0.251969	0.0697674	0.142857	0.0307692	0.277778	0.232143	0.196429	0.234375	0.0694444	0.037037	0.0181818	0.244898	0.226415	0.0571429	0.25
OV_M337	0.206897	0.215517	0.396694	0.19403	0.12069	0.0207254	0.449664	0.0286885	0.327869	0.032	0.0222222	0.056338	0.0782609	0.210084	0.140351	0.491525	0.251969	1	0.0837696	0.059322	0.0306748	0.257812	0.194915	0.304054	0.213115	0.035461	0.0232558	0.0276243	0.140351	0.145299	0.0362319	0.28125
BLCA_M1193	1	0.478261	0.272727	0.0322581	0.333333	0.106383	0.244898	0.0606061	0.295455	0.0294118	0.0625	0.0555556	0.047619	0.09375	0.34375	0.230769	0.222222	0.208955	0.206897	0.0555556	0.0625	0.214286	0.146341	0.0365854	0.2	0.15625	0.0277778	0.0425532	0.0487805	0.214286	0.0689655	0.217391
BLCA_M1660	1	0.529412	0.169811	0.0434783	0.28	0.142857	0.152174	0.08	0.277778	0.0384615	0.0833333	0.0461538	0.0454545	0.0384615	0.25	0.142857	0.0689655	0.153846	0.227273	0.0714286	0.0487805	0.194444	0.108108	0.0434783	0.166667	0.16	0.0357143	0.0160428	0.00947867	0.162162	0	0.2
BRCA_M517	0.529412	1	0.148148	0.0434783	0.454545	0.142857	0.204545	0.08	0.352941	0.0384615	0.0833333	0.0625	0.0545455	0.125	0.458333	0.25	0.136364	0.232558	0.173913	0.0714286	0.075	0.194444	0.09375	0.0547945	0.333333	0.0740741	0.0243902	0.030303	0.0357143	0.209302	0.0333333	0.2
COAD_M50	0.333333	0.454545	0.152542	0.0357143	1	0.111111	0.204082	0.0645161	0.380952	0.03125	0.0727273	0.0571429	0.0491803	0.0645161	0.380952	0.314286	0.107143	0.204082	0.178571	0.0666667	0.0652174	0.166667	0.097561	0.0506329	0.307692	0.0606061	0	0	0.0294118	0.16	0.0740741	0.173913
LUAD_M309	0.24	0.4375	0.0925926	0.05	0.380952	0.166667	0.136364	0.0909091	0.333333	0.0666667	0.0638298	0.0483871	0.0454545	0.0909091	1	0.275862	0.1	0.219512	0.142857	0.0454545	0.0810811	0.111111	0.0322581	0.0422535	0.315789	0.047619	0.04	0.018018	0.04	0.139535	0	0.173913
LUAD_M80	0.34375	0.458333	0.183333	0.0588235	0.322581	0.1	0.265306	0.0588235	0.230769	0.047619	0.0606061	0.0547945	0.037037	0.0909091	1	0.4	0.214286	0.291667	0.125	0.0444444	0.0612245	0.155556	0.0909091	0.0361446	0.233333	0.047619	0.0294118	0.0638298	0.0731707	0.22	0	0.212766
BLCA_M1283	1	0.0136986	0.294118	0.135135	0	0.05	0.208333	0.047619	0.25	0.238095	0.0526316	0.235294	0.047619	0.272727	0.35	0.139535	0.111111	0.192308	0.208333	0.428571	0.0434783	0.25	0.0471698	0.0545455	0.047619	0.0416667	0.047619	0.0769231	0.030303	0.111111	0.047619	0.166667
CESC_M386	0.142857	0.037037	1	0.289474	0	0.0769231	0.304348	0.0689655	0.285714	0.181818	0.03125	0.236842	0.0625	0.166667	0.318182	0.191489	0.285714	0.117647	0.16129	0.423077	0.0333333	0.173913	0.0350877	0.0483871	0.142857	0.0740741	0.0263158	0.0526316	0.0344828	0.227273	0.09375	0.209302
ESCA_M399	0.205128	0.0545455	0.285714	0.352941	0.0408163	0.0434783	1	0.0440252	0.175	0.261905	0.0361446	0.367347	0.0555556	0.27907	0.289474	0.433962	0.146341	0.206349	0.12	0.425	0.025641	0.345455	0.0697674	0.0625	0.166667	0.0574713	0.0208333	0.037037	0.0350877	0.12766	0.0576923	0.241379
KIRP_M244	0.212121	0.0408163	0.236842	0.377778	0.047619	0.0298507	0.367347	0.047619	0.176471	0.277778	0.0344828	1	0.0638298	0.263158	0.27027	0.408163	0.0652174	0.194444	0.113636	0.428571	0.0338983	0.240741	0.0650407	0.0540541	0.166667	0.0625	0.0363636	0.0434783	0.0454545	0.0592105	0.0434783	0.226415
LUSC_M745	0.227273	0.176471	0.191489	0.339623	0.152174	0.027027	0.433962	0.0434783	0.139535	0.207921	0.0357143	0.408163	0.0675676	0.195876	0.275	1	0.113636	0.392857	0.113636	0.311111	0.0294118	0.204082	0.0526316	0.0549451	0.243902	0.0714286	0.047619	0.0508475	0.0377358	0.122449	0.0555556	0.206897
PCPG_M388	0.428571	0.0338983	0.423077	0.368421	0	0.0689655	0.425	0.0625	0.304348	0.235294	0.0454545	0.428571	0.0666667	0.266667	0.28	0.311111	0.2	0.119048	0.181818	1	0.0333333	0.25	0.0521739	0.0625	0.108696	0.0666667	0.0253165	0.075	0.0186916	0.153846	0.0857143	0.195652
BLCA_M1590	1	0.12766	0.228571	0.0540541	0.148148	0.0384615	0.4375	0.107143	0	0.0454545	0.0952381	0.0357143	0.0243902	0.125	0.126984	0.4	0.047619	0.142857	0.0952381	0.115385	0.05	0.142857	0.291667	0.352941	0	0.181818	0.0142857	0.0952381	0.04	0.333333	0	0.181818
ESCA_M107	0.4375	0.173913	0.257143	0.0526316	0.142857	0.037037	1	0.142857	0	0.030303	0.119048	0.037037	0.0267857	0.179487	0.16129	0.52381	0.130435	0.195122	0.0909091	0.304348	0.047619	0.178571	0.333333	0.411765	0.0294118	0.25	0.0106383	0.0909091	0.0384615	0.5625	0	0.227273
LUSC_M1557	0.4	0.106383	0.2	0.0555556	0.111111	0.0384615	0.466667	0.0714286	0	0.0526316	0.0714286	0	0.0246914	0.157895	0.129032	1	0.0909091	0.119048	0.1	0.166667	0.047619	0.0689655	0.2	0.294118	0.05	0.151515	0.0143369	0.1	0.04	0.352941	0	0.190476
LUSC_M782	0.347826	0.215686	0.268293	0.0434783	0.142857	0.0307692	0.52381	0.111111	0.0967742	0.0344828	0.145833	0.0344828	0.0336134	0.148936	0.212121	1	0.0967742	0.185185	0.0666667	0.266667	0.0344828	0.138889	0.333333	0.52381	0.0333333	0.2	0.0138408	0.0666667	0.0336134	0.375	0	0.216216
SKCM_M190	0.352941	0.2	0.222222	0.0526316	0.142857	0.0357143	0.411765	0.142857	0.1	0.03125	0.205128	0	0.0454545	0.15	0.125	0.52381	0.0833333	0.2	0.142857	0.25	0.0909091	0.137931	0.333333	1	0	0.212121	0.0106383	0.0909091	0.036036	0.388889	0	0.233333
UCS_M584	0.333333	0.170213	0.25	0.0512821	0.137931	0.0344828	0.5625	0.137931	0	0.03125	0.116279	0	0.0265487	0.146341	0.123077	0.375	0.125	0.162791	0	0.24	0	0.133333	0.32	0.388889	0	0.242424	0.0106007	0.0869565	0.0357143	1	0	0.217391
BLCA_M229	1	0.142857	0.227273	0.0689655	0.0208333	0.0434783	0.0869565	0.0625	0.166667	0.117647	0.0408163	0.0869565	0.333333	0.285714	0.121212	0.0722892	0.0574713	0.15625	0.421053	0.26087	0.611111	0.391304	0.0526316	0.0384615	0.291667	0.0384615	0.0731707	0.037037	0.108108	0.0833333	0.0416667	0.241379
LGG_M666	0.333333	0.0491803	0.227273	0.0416667	0.0277778	0	0.0416667	0.0833333	0.166667	0.117647	0.04	0.0869565	1	0.285714	0.121212	0.0595238	0.0697674	0.121212	0.588235	0.380952	0.318182	0.391304	0.0357143	0.0280374	0.409091	0.037037	0.047619	0.0769231	0.0789474	0.0416667	0.0416667	0.333333
PAAD_M567	0.421053	0.05	0.238095	0.0434783	0	0	0.0434783	0.0555556	0.138889	0.121212	0.0571429	0.0909091	0.588235	0.25	0.125	0.060241	0.045977	0.125	1	0.333333	0.333333	0.409091	0.037037	0.0357143	0.428571	0.037037	0.0487805	0.08	0.111111	0.0454545	0.0322581	0.4
PRAD_M564	0.611111	0.12	0.166667	0.0666667	0	0.0377358	0.0833333	0.0606061	0.162162	0.147059	0.0357143	0.0833333	0.318182	0.275862	0.117647	0.0465116	0.0568182	0.225806	0.333333	0.304348	1	0.32	0.0512821	0.037037	0.28	0.0357143	0.0465116	0.0357143	0.105263	0.0810811	0.0357143	0.275862
READ_M225	0.391304	0.0625	0.24	0.0357143	0	0.04	0.0357143	0.0379747	0.210526	0.105263	0.0377358	0.0740741	0.391304	0.333333	0.108108	0.0813953	0.0786517	0.108108	0.409091	0.32	0.32	1	0.03125	0.0322581	0.458333	0.0344828	0.0666667	0.0322581	0.097561	0.0357143	0.0357143	0.25
STAD_M215	0.291667	0.046875	0.153846	0.0344828	0	0.0645161	0.037037	0.05	0.125	0.108108	0.0357143	0.0232558	0.409091	0.258065	0.0810811	0.0697674	0.0555556	0.0810811	0.428571	0.185185	0.28	0.458333	0.037037	0.03125	1	0.0344828	0.0444444	0.0689655	0.1	0.0333333	0.037037	0.258065
BLCA_M232	1	0.222222	0.40625	0.0526316	0.193548	0.0408163	0.142857	0.14	0.470588	0.0810811	0.0625	0.169492	0.030303	0.121212	0.315789	0.277778	0.241935	0.272727	0.0731707	0.194444	0.0555556	0.190476	0.416667	0.25	0.266667	0.0566038	0.133333	0.0606061	0.133333	0.325	0.0285714	0.268293
CESC_M634	0.40625	0.171429	1	0.0526316	0.172414	0.0434783	0.125	0.173913	0.424242	0.0571429	0.0909091	0.178571	0.04	0.0967742	0.205128	0.259259	0.213115	0.204545	0.0759494	0.202899	0.0606061	0.205128	0.347826	0.196429	0.1875	0.06	0.142857	0.0461538	0.0689655	0.315789	0.03125	0.166667
HNSC_M1294	0.40625	0.322581	0.4	0.0526316	0.214286	0.0434783	0.285714	0.2	1	0.0555556	0.0689655	0.157895	0.0333333	0.172414	0.342857	0.307692	0.321429	0.394737	0.0897436	0.220588	0.05	0.236842	0.347826	0.264151	0.310345	0.06	0.129032	0.0377358	0.0416667	0.428571	0.0322581	0.166667
HNSC_M644	0.470588	0.277778	0.424242	0.0465116	0.181818	0.0392157	0.25	0.18	1	0.0769231	0.0588235	0.163934	0.0285714	0.147059	0.333333	0.314815	0.338983	0.348837	0.0843373	0.205479	0.0526316	0.209302	0.333333	0.333333	0.264706	0.0545455	0.111111	0.0571429	0.125	0.447368	0.0277778	0.2
SARC_M1499	0.416667	0.25	0.347826	0.0833333	0.352941	0.05	0.172414	0.142857	0.347826	0.05	0.111111	0.145833	0.0526316	0.15	0.285714	0.277778	0.25	0.235294	0.0882353	0.142857	0.0638298	0.2	1	0.217391	0.285714	0.0769231	0.0909091	0.05	0.111111	0.3125	0.05	0.210526
UCS_M252	0.325	0.195122	0.315789	0.0434783	0.135135	0.037037	0.177778	0.127273	0.447368	0.0537634	0.0512821	0.121212	0.0263158	0.125	0.222222	0.321429	0.28125	0.27907	0.0689655	0.166667	0.0487805	0.122449	0.307692	0.271186	0.179487	0.0689655	0.102564	0.0327869	0.0641026	1	0.025	0.117647
BLCA_M482	1	0.104167	0.4375	0.0952381	0	0.05	0.466667	0.1	0.444444	0.1	0.0869565	0.24	0.0333333	0.047619	0.222222	0.333333	0.105263	0.162162	0.0454545	0.111111	0.0384615	0.368421	0.105263	0.0909091	0.428571	0.0769231	0.0526316	0.0384615	0.0810811	0.05	0.12	0.0555556
CESC_M140	0.291667	0.185185	1	0.0666667	0	0.0571429	0.375	0.148148	0.423077	0.047619	0.0754717	0.235294	0.075	0.142857	0.166667	0.258065	0.12766	0.164384	0.0833333	0.0333333	0.047619	0.233333	0.108108	0.0869565	0.291667	0.0681818	0.0333333	0.03125	0.0625	0.147059	0.147059	0.139535
CESC_M746	0.4375	0.142857	1	0.0833333	0	0.0416667	0.470588	0.136364	0.526316	0.0434783	0.0769231	0.259259	0.0416667	0.0625	0.227273	0.291667	0.097561	0.166667	0.0367647	0.0454545	0.0454545	0.318182	0.1	0.107143	0.352941	0.0666667	0.0454545	0.0266667	0.0487805	0.0869565	0.148148	0.108108
ESCA_M1255	0.466667	0.122449	0.470588	0.0869565	0.04	0.0454545	1	0.125	0.555556	0.0434783	0.08	0.32	0.03125	0.1	0.181818	0.363636	0.1	0.178571	0.1	0.047619	0.0434783	0.4	0.15	0.115385	0.571429	0.0689655	0.0454545	0.047619	0.0769231	0.111111	0.111111	0.142857
HNSC_M566	0.444444	0.134615	0.526316	0.0740741	0	0.037037	0.555556	0.0810811	1	0.037037	0.0833333	0.275862	0.06	0.0740741	0.21875	0.36	0.0909091	0.212121	0.04	0.04	0.0384615	0.28	0.0909091	0.153846	0.444444	0.129032	0.04	0.037037	0.0697674	0.0967742	0.133333	0.128205
STAD_M800	0.428571	0.104167	0.352941	0.0952381	0	0.05	0.571429	0.1	0.444444	0.0645161	0.0869565	0.24	0.0666667	0.0952381	0.222222	0.272727	0.105263	0.176471	0.0526316	0.0526316	0.0434783	0.238095	0.105263	0.0869565	1	0.0588235	0.047619	0.0526316	0.0810811	0.0769231	0.0769231	0.0857143
BLCA_M834	1	0.304348	0.214286	0.0869565	0.611111	0.0384615	0.416667	0.0357143	0.244898	0.0769231	0.0952381	0.0454545	0.125	0.347826	0.526316	0.357143	0.285714	0.291667	0.0909091	0.2	0.04	0.285714	0.193548	0.346154	0.27027	0.0540541	0.0909091	0	0.45	0.1	0.105263	0.166667
BRCA_M1098	0.304348	1	0.241379	0.0862069	0.32	0.0571429	0.272727	0.0384615	0.275862	0.103448	0.08	0.0666667	0.111111	0.305556	0.5	0.4	0.215686	0.346154	0.12	0.217391	0.0588235	0.290323	0.242424	0.3	0.243902	0.0652174	0.0769231	0.0240964	0.375	0.121212	0.0697674	0.173913
COAD_M248	0.611111	0.32	0.224138	0.0769231	1	0.0263158	0.423077	0.025	0.254902	0.0689655	0.0833333	0.0425532	0.114286	0.307692	0.52381	0.366667	0.363636	0.259259	0.08	0.173913	0.0377358	0.26	0.25	0.310345	0.351351	0.05	0.08	0	0.391304	0.0909091	0.097561	0.178571
ESCA_M1338	0.416667	0.225806	0.288136	0.0983607	0.423077	0.0294118	1	0.0277778	0.254545	0.0588235	0.0689655	0.0555556	0.1	0.307692	0.37037	0.352941	0.296296	0.3	0.0857143	0.142857	0.0344828	0.236364	0.184211	0.264706	0.25	0.0444444	0.0666667	0.0333333	0.321429	0.138889	0.0869565	0.148148
LUAD_M108	0.526316	0.5	0.245614	0.0877193	0.52381	0.037037	0.37037	0.04	0.241379	0.107143	0.0833333	0.0425532	0.114286	0.36	1	0.366667	0.2	0.307692	0.08	0.173913	0.0384615	0.344828	0.162162	0.357143	0.351351	0.05	0.08	0.0243902	0.52381	0.12	0.097561	0.181818
UCEC_M672	0.45	0.375	0.224138	0.107143	0.391304	0.037037	0.321429	0.0465116	0.333333	0.0689655	0.0833333	0.04	0.114286	0.314286	0.52381	0.366667	0.244898	0.307692	0.09	0.125	0.0408163	0.258065	0.194444	0.310345	0.282051	0.0909091	0.08	0.0384615	1	0.2	0.097561	0.181818
BRCA_M516	0.153846	1	0.0740741	0.0526316	0.0869565	0.1	0.333333	0.1	0.333333	0.15	0.153846	0.111111	0.0612245	0.0606061	0.0625	0.111111	0.0454545	0.4375	0.115385	0.0888889	0.0526316	0.0645161	0.190476	0.12	0.0857143	0.08	0.05	0.0384615	0.0384615	0.0357143	0	0.1
ESCA_M199	0.309091	0.307692	0.134831	0.0638298	0.0540541	0.047619	1	0.0697674	0.461538	0.0882353	0.1	0.102564	0.0681818	0.105263	0.0967742	0.21875	0.0277778	0.321429	0.0571429	0.145455	0.030303	0.0606061	0.3	0.176471	0.113924	0.0882353	0.0294118	0.0625	0.129032	0.0909091	0.0833333	0.0833333
ESCA_M832	0.265306	0.333333	0.1375	0.0810811	0.0740741	0.0625	1	0.0909091	0.555556	0.0833333	0.0967742	0.137931	0.0882353	0.142857	0.142857	0.26087	0.0416667	0.35	0.08	0.152174	0.0434783	0.0869565	0.45	0.2	0.130435	0.125	0.0416667	0.0434783	0.190476	0.12	0.115385	0.115385
HNSC_M380	0.265306	0.333333	0.151899	0.0810811	0.0384615	0.0625	0.555556	0.0909091	1	0.0833333	0.0967742	0.137931	0.0882353	0.142857	0.0857143	0.208333	0.0526316	0.5	0.08	0.177778	0.0149254	0.0869565	0.45	0.2	0.114286	0.125	0.0416667	0.0434783	0.190476	0.12	0.0740741	0.0740741
OV_M1570	0.230769	0.4375	0.097561	0.0416667	0.0769231	0.0454545	0.35	0.0869565	0.5	0.130435	0.137931	0.0952381	0.0576923	0.107143	0.0882353	0.08	0.0434783	1	0.0833333	0.130435	0.0164835	0.0526316	0.333333	0.115385	0.084507	0.130435	0.0434783	0.0434783	0.142857	0.0454545	0.0645161	0.0869565
SARC_M1047	0.211538	0.190476	0.121951	0.0789474	0.0714286	0.0384615	0.45	0.0882353	0.45	0.08	0.0606061	0.133333	0.0857143	0.137931	0.0869565	0.2	0.0512821	0.333333	0.0869565	0.173913	0.0294118	0.0833333	1	0.192308	0.128571	0.12	0.04	0.0434783	0.181818	0.16	0.0714286	0.08
BRCA_M532	0.263158	1	0.234043	0.130435	0	0.0454545	0.214286	0.0869565	0.285714	0.0909091	0.0909091	0.0555556	0	0.117647	0.275862	0.25	0.181818	0.409091	0.04	0.0952381	0.0384615	0.296296	0.15	0.0375	0.275862	0.0666667	0.0454545	0.0487805	0.135135	0.190476	0.0571429	0.142857
ESCA_M492	0.1875	0.214286	0.157895	0.133333	0.0294118	0.047619	1	0.1	0.177778	0.142857	0.0322581	0.0666667	0.0689655	0.140351	0.259259	0.407407	0.172414	0.444444	0.0392157	0.0333333	0.0322581	0.387097	0.148148	0.0487805	0.25	0.030303	0.0322581	0.0322581	0.0638298	0.137931	0.0714286	0.172414
LUAD_M722	0.2	0.130435	0.190476	0.130435	0	0.0416667	0.259259	0.0625	0.32	0.0909091	0.0333333	0.0810811	0.0454545	0.153846	1	0.428571	0.210526	0.4375	0.0227273	0.0952381	0.04	0.129032	0.15	0.0375	0.233333	0.0454545	0.0454545	0.05	0.045977	0.25	0.0357143	0.0833333
LUSC_M519	0.172414	0.25	0.107143	0.111111	0	0.0357143	0.407407	0.0740741	0.225	0.12	0.037037	0.0731707	0.0517241	0.133333	0.428571	1	0.111111	0.666667	0.0333333	0.08	0.0571429	0.227273	0.2	0.0689655	0.28125	0.0344828	0.037037	0.037037	0.0454545	0.16	0.0512821	0.111111
OV_M1573	0.173913	0.210526	0.1	0.15	0	0.047619	0.409091	0.0833333	0.166667	0.105263	0.0145985	0.0666667	0.0588235	0.102041	0.4375	0.5	0.210526	1	0.0384615	0.111111	0.0454545	0.230769	0.25	0.0382166	0.259259	0	0.0526316	0.0526316	0.0526316	0.222222	0.0625	0.0952381
OV_M893	0.152174	0.409091	0.188679	0.148148	0	0.0344828	0.444444	0.0769231	0.315789	0.0740741	0.0357143	0.0714286	0.0508475	0.107143	0.291667	0.666667	0.148148	1	0.037037	0.0769231	0.0555556	0.290323	0.166667	0.0666667	0.235294	0.0322581	0.037037	0.037037	0.0930233	0.2	0.05	0.107143
BRCA_M863	0.0697674	1	0.32	0.125	0.529412	0.0625	0.103448	0.0769231	0.2	0.12	0.037037	0.135135	0.0666667	0.238095	0.1	0.619048	0.214286	0.611111	0.0441176	0.0689655	0.0833333	0.181818	0.044586	0.268293	0.0857143	0.0833333	0.0285714	0.0465116	0.0810811	0.193548	0.107143	0.111111
COAD_M228	0.0740741	0.416667	0.25	0.0277778	1	0.017094	0.0909091	0.0714286	0.151515	0.0810811	0.0327869	0.0851064	0.0416667	0.133333	0.0645161	0.384615	0.105882	0.409091	0.027027	0.0645161	0.0444444	0.0769231	0.0408163	0.2	0.0588235	0.0645161	0.0289855	0.0444444	0.0789474	0.114286	0.1	0.09375
COAD_M463	0.0810811	0.529412	0.285714	0.166667	1	0.0243902	0.12	0.0120482	0.153846	0.0526316	0.00787402	0.125	0.05	0.25	0.08	0.473684	0.166667	0.533333	0.0357143	0.0869565	0.111111	0.176471	0.0487805	0.210526	0.103448	0.0952381	0.0327869	0.0540541	0.0882353	0.0540541	0.0869565	0.0909091
LUSC_M423	0.0666667	0.619048	0.4	0.115385	0.473684	0.0588235	0.133333	0.0740741	0.225806	0.111111	0.0344828	0.128205	0.0638298	0.272727	0.117647	1	0.333333	0.722222	0.0428571	0.0645161	0.0769231	0.166667	0.0645161	0.255814	0.0810811	0.0857143	0.0289855	0.0444444	0.0789474	0.181818	0.1	0.117647
OV_M1313	0.075	0.611111	0.363636	0.142857	0.533333	0.0689655	0.115385	0.0909091	0.222222	0.136364	0.0416667	0.147059	0.0714286	0.277778	0.111111	0.722222	0.24	1	0.0461538	0.037037	0.05	0.210526	0.0454545	0.25641	0.09375	0.0888889	0.0384615	0.05	0.0694444	0.133333	0.12	0.1
OV_M679	0.311111	0.302326	0.340909	0.064	0.219512	0.0740741	0.16	0.0909091	0.176471	0.0689655	0.0714286	0.137931	0.0434783	0.2	0.357143	0.45	0.26087	1	0.0391061	0.0576923	0.183673	0.115385	0.111111	0.288136	0.175439	0.0857143	0.0266667	0.04	0.12766	0.109091	0.12	0.191011
COAD_M335	0.266667	0.0471311	0.169492	0.16	1	0.0416667	0.259259	0.0310078	0.227273	0.0714286	0.25	0.142857	0.0238095	0.150685	0.1875	0.163636	0.2	0.0512821	0.171171	0.205128	0.173913	0.404255	0.171429	0.192308	0.395349	0.288889	0.153846	0.131579	0.15625	0.036036	0.0408163	0.0422535
COAD_M79	0.181818	0.066	0.197368	0.210526	1	0.0319149	0.323529	0.0402685	0.259259	0.0634921	0.261538	0.181818	0.034632	0.218391	0.271739	0.228571	0.265306	0.0501475	0.245902	0.232143	0.206349	0.442623	0.181818	0.253731	0.345455	0.290323	0.230769	0.16129	0.2	0.0458015	0.038961	0.0493827
KIRC_M179	0.222222	0.0494845	0.264151	0.1875	0.261538	0.0327869	0.32	0.0314961	0.278689	0.114286	1	0.28125	0.0789474	0.205882	0.273973	0.265306	0.219512	0.0539683	0.163636	0.451613	0.268293	0.391304	0.176471	0.25	0.183673	0.324324	0.257143	0.183099	0.285714	0.0462963	0.0769231	0.0428571
PCPG_M872	0.235294	0.0333333	0.317073	0.184211	0.232143	0.0416667	0.292683	0.0350877	0.3	0.181818	0.451613	0.4	0.12	0.277778	0.212121	0.289474	0.208333	0.0424837	0.138614	1	0.3	0.416667	0.155172	0.275862	0.291667	0.44	0.190476	0.163934	0.311111	0.0526316	0.102564	0.0555556
READ_M292	0.244898	0.0510204	0.280702	0.2	0.442623	0.0454545	0.384615	0.0384615	0.3125	0.097561	0.391304	0.27027	0.0681818	0.257143	0.302632	0.283019	0.261905	0.0529595	0.218182	0.416667	0.288889	1	0.178082	0.346939	0.333333	0.347826	0.220779	0.168831	0.278689	0.0530973	0.0689655	0.0629371
TGCT_M1411	0.243243	0.0309278	0.26087	0.166667	0.243902	0.03125	0.266667	0.0252101	0.264706	0.111111	0.324324	0.185185	0.0666667	0.177419	0.217391	0.204545	0.181818	0.0453074	0.144231	0.44	0.194444	0.309524	0.126984	0.214286	0.206897	1	0.161765	0.153846	0.211538	0.0505051	0.0681818	0.0620155
ESCA_M442	0.131579	0.136364	0.0540541	0.192308	0.153846	0.0810811	1	0.2	0.411765	0.1875	0.0416667	0.08	0.0666667	0.160714	0.333333	0.0882353	0.0473373	0.45	0.0322581	0.0416667	0.0454545	0.25	0.227273	0.0405405	0.380952	0.0408163	0.0333333	0.0384615	0.125	0.148148	0.0416667	0.12
HNSC_M699	0.138889	0.15	0.0571429	0.115385	0.194444	0.0857143	0.411765	0.294118	1	0.241379	0.0434783	0.0869565	0.0454545	0.145455	0.571429	0.129032	0.0479042	0.421053	0.0454545	0.0454545	0.0166667	0.310345	0.25	0.0416667	0.5	0.0434783	0.00867052	0.0416667	0.190476	0.16	0.0454545	0.130435
LUAD_M322	0.102041	0.126761	0.136364	0.166667	0.302326	0.0625	0.321429	0.322581	0.458333	0.324324	0.0491803	0.151515	0.0727273	0.145833	1	0.170732	0.0681818	0.428571	0.0649351	0.0461538	0.0714286	0.307692	0.266667	0.047619	0.37931	0.0434783	0.027027	0.0555556	0.117647	0.272727	0.0392157	0.133333
LUAD_M849	0.108108	0.15	0.0882353	0.0779221	0.228571	0.0555556	0.333333	0.217391	0.571429	0.241379	0.0625	0.0869565	0.0571429	0.15	1	0.09375	0.0416667	0.35	0.037037	0.0416667	0.0666667	0.1875	0.190476	0.0322581	0.35	0.0416667	0	0.0416667	0.136364	0.115385	0.0454545	0.111111
OV_M776	0.121951	0.125	0.0769231	0.172414	0.230769	0.075	0.45	0.32	0.421053	0.242424	0.037037	0.111111	0.0851064	0.152542	0.428571	0.084507	0.0588235	1	0.0422535	0.0384615	0.04	0.264706	0.304348	0.0769231	0.333333	0.0384615	0.0151515	0.0384615	0.153846	0.214286	0.037037	0.130435
STAD_M394	0.121951	0.12	0.105263	0.172414	0.263158	0.075	0.380952	0.222222	0.5	0.205882	0.0454545	0.25	0.0625	0.152542	0.37931	0.111111	0.0650888	0.333333	0.0422535	0.0480769	0.0882353	0.228571	0.2	0.0512821	1	0.047619	0.0625	0.037037	0.153846	0.214286	0.037037	0.130435
GBM_M1046	0.284916	0.321429	0.273196	0.264706	0.27907	0.136752	0.198582	1	0.260606	0.286364	0.267176	0.347107	0.457746	0.292683	0.26257	0.244444	0.284722	0.277311	0.360902	0.311558	0.273381	0.203488	0.244604	0.220339	0.317568	0.32	0.358333	0.122449	0.292553	0.307692	0.140152	0.243421
GBM_M432	0.28125	0.322115	0.270531	0.253333	0.248276	0.128	0.186528	1	0.244444	0.3	0.263889	0.316176	0.486667	0.273743	0.267016	0.247863	0.280255	0.300813	0.331081	0.325359	0.245161	0.198925	0.236162	0.221053	0.294479	0.311594	0.316176	0.110429	0.304147	0.300699	0.140288	0.23494
GBM_M82	0.271357	0.311628	0.261682	0.242038	0.236842	0.124514	0.18	1	0.235294	0.324675	0.251656	0.300699	0.464968	0.263441	0.257576	0.240664	0.268293	0.29249	0.316129	0.3375	0.234568	0.19171	0.234657	0.213198	0.282353	0.296552	0.300699	0.112426	0.294643	0.286667	0.136842	0.225434
LGG_M122	0.25	0.283843	0.242291	0.210526	0.219512	0.0905797	0.186603	0.486667	0.221106	0.287449	0.22561	0.269076	1	0.238562	0.202765	0.239044	0.208791	0.284091	0.301205	0.351598	0.19774	0.169082	0.242105	0.21256	0.256831	0.290323	0.285714	0.107143	0.290598	0.2607	0.135135	0.185874
LGG_M15	0.232877	0.264085	0.226148	0.187919	0.183036	0.10574	0.16791	0.418269	0.203125	0.298305	0.196721	0.257426	1	0.268571	0.176895	0.220779	0.211765	0.2625	0.252	0.344595	0.183761	0.137037	0.228739	0.201166	0.224066	0.232558	0.243137	0.0996016	0.265517	0.250804	0.139205	0.192547
LGG_M503	0.232432	0.253659	0.218905	0.214286	0.244275	0.0819672	0.192857	0.419847	0.204678	0.237885	0.223881	0.257812	1	0.186441	0.191489	0.212389	0.196078	0.232653	0.335821	0.288557	0.206897	0.165414	0.205323	0.18232	0.245161	0.273438	0.272189	0.0925926	0.255924	0.235294	0.128302	0.176101
BLCA_M1225	1	0.151515	0.185185	0.047619	0.0769231	0.05	0.181818	0.0291262	0.219512	0.0740741	0.0689655	0.0714286	0.0571429	0.162162	0.206897	0.388889	0.047619	0.5	0.0869565	0.1	0.0454545	0.103448	0.315789	0.105263	0.227273	0.0606061	0.04	0.0769231	0.04	0.0606061	0.047619	0.0769231
LUAD_M444	0.315789	0.157895	0.216216	0.15625	0.189655	0.0909091	0.268293	0.0917431	0.3125	0.102564	0.257143	0.137255	0.162791	0.254545	1	0.407407	0.0810811	0.307692	0.137255	0.1	0.0408163	0.125	0.266667	0.212121	0.333333	0.0869565	0.0340909	0.0327869	0.075	0.230769	0.121212	0.16129
LUSC_M1161	0.388889	0.12	0.206897	0.0769231	0.134615	0.0833333	0.272727	0.0582524	0.292683	0.0833333	0.133333	0.0666667	0.0810811	0.179487	0.407407	1	0.0689655	0.5	0.0909091	0.0869565	0.0434783	0.09375	0.4	0.2	0.304348	0.0810811	0.04	0.0689655	0.0384615	0.157895	0.0454545	0.0483871
OV_M2048	0.5	0.111111	0.24	0.0909091	0.122449	0.1	0.151515	0.05	0.225	0.047619	0.153846	0.047619	0.0588235	0.135135	0.307692	0.5	0.08	1	0.1	0.105263	0.047619	0.107143	0.411765	0.176471	0.3	0.0625	0.0416667	0.08	0.0416667	0.133333	0.05	0.0526316
SARC_M1248	0.333333	0.12	0.166667	0.09375	0.113208	0.0833333	0.2	0.0480769	0.261905	0.130435	0.0967742	0.0909091	0.0526316	0.179487	0.266667	0.4	0.0833333	0.411765	0.0666667	0.0869565	0.0384615	0.09375	1	0.142857	0.363636	0.0810811	0.0416667	0.0689655	0.0434783	0.1875	0.0454545	0.0833333
BLCA_M1538	1	0.428571	0.615385	0.0769231	0	0.0666667	0.24	0.0625	0.205128	0.0350877	0.111111	0.166667	0.0434783	0.291667	0.176471	0.157895	0.192308	0.210526	0.333333	0.103448	0.047619	0.291667	0.130435	0.047619	0.2	0.0512821	0.047619	0.0454545	0.0454545	0.137931	0.05	0.105263
BRCA_M633	0.428571	1	0.5	0.0769231	0	0.0322581	0.291667	0.0689655	0.27027	0.0727273	0.176471	0.166667	0	0.347826	0.333333	0.257143	0.192308	0.277778	0.428571	0.157895	0.0697674	0.409091	0.181818	0.05	0.363636	0.04	0.030303	0.0454545	0.0833333	0.178571	0.105263	0.0952381
CESC_M587	0.615385	0.5	1	0.075	0	0.0645161	0.230769	0.0606061	0.230769	0.0714286	0.105263	0.157895	0.0416667	0.28	0.242424	0.184211	0.185185	0.2	0.3125	0.0952381	0.05	0.333333	0.142857	0.0454545	0.24	0.05	0.0454545	0.0434783	0.0526316	0.172414	0.1	0.102564
PAAD_M479	0.333333	0.428571	0.3125	0.0952381	0	0.0163934	0.24	0.0689655	0.236842	0.0425532	0.111111	0.166667	0.05	0.24	0.212121	0.189189	0.192308	0.15	1	0.157895	0.0697674	0.24	0.181818	0.05	0.25	0.0512821	0.047619	0	0.0833333	0.222222	0.05	0.0769231
READ_M267	0.295455	0.409091	0.333333	0.06	0	0.0322581	0.2	0.0333333	0.348837	0.0769231	0.107143	0.103448	0.0333333	0.4	0.243902	0.222222	0.272727	0.217391	0.24	0.131579	0.0363636	1	0.234043	0.0571429	0.340909	0.04	0.0416667	0.0377358	0.0416667	0.189189	0.0666667	0.142857
BLCA_M159	1	0.272727	0.2	0.122449	0.0909091	0.0338983	0.209677	0.0857143	0.350877	0.0392157	0.0327869	0.047619	0.117647	0.168224	0.350877	0.43038	0.060241	0.292929	0.365854	0.0851064	0.0350877	0.386667	0.4	0.164384	0.283333	0.0421053	0.037037	0.0350877	0.173913	0.337209	0.037037	0.102941
LUAD_M26	0.345679	0.2125	0.238095	0.1	0.0810811	0.0352941	0.289474	0.101562	0.350649	0.0555556	0.035503	0.0390625	0.12	0.160305	1	0.538462	0.131868	0.276243	0.220588	0.0684932	0.025	0.271845	0.428571	0.142857	0.305882	0.057377	0.0409836	0.0291262	0.150685	0.363636	0.0353982	0.108696
LUSC_M205	0.43038	0.216867	0.213483	0.144444	0.0705882	0.0232558	0.291139	0.10687	0.384615	0.0620155	0.0467836	0.036036	0.113924	0.172932	0.538462	1	0.114583	0.382609	0.208333	0.0512821	0.0246914	0.377551	0.458824	0.148515	0.292135	0.0555556	0.0441176	0.026455	0.148649	0.474747	0.0357143	0.104167
SARC_M75	0.347826	0.163636	0.239437	0.157895	0.0757576	0.0275229	0.366667	0.116071	0.396825	0.0733945	0.0460526	0.0353982	0.152542	0.162393	0.428571	0.458824	0.144737	0.25	0.264151	0.0689655	0.0337079	0.223404	1	0.142857	0.266667	0.0555556	0.0373832	0.0295858	0.133333	0.268293	0.030303	0.102564
UCS_M30	0.337209	0.211765	0.16	0.117021	0.0449438	0.0217391	0.136842	0.0707965	0.195652	0.0530303	0.0284091	0.0265487	0.097561	0.128571	0.352381	0.474747	0.0792079	0.387931	0.155844	0.0429185	0.0240964	0.245455	0.26	0.12381	0.21875	0.0465116	0.0285714	0.0208333	0.12987	1	0.0348837	0.0909091
BLCA_M1630	1	0.205128	0.25	0.178571	0.3	0.0921053	0.0625	0.263158	0.272727	0.272727	0.0666667	0.466667	0.153846	0.16129	0.333333	0.117647	0.444444	0.0865385	0.375	0.421053	0.26087	0.333333	0.45	0.222222	0.175	0.0666667	0.0661157	0.105263	0.3125	0.291667	0.0740741	0.105263
KIRP_M714	0.466667	0.236842	0.25	0.222222	0.3	0.106667	0.0515464	0.263158	0.272727	0.272727	0.0666667	1	0.176471	0.142857	0.263158	0.117647	0.368421	0.0970874	0.375	0.421053	0.26087	0.4	0.380952	0.269231	0.236842	0.0434783	0.0840336	0.105263	0.235294	0.291667	0.0740741	0.105263
MESO_M272	0.444444	0.214286	0.380952	0.15625	0.25	0.0875	0.0444444	0.217391	0.230769	0.185185	0.0547945	0.368421	0.122807	0.134328	0.4	0.12963	1	0.0833333	0.275862	0.409091	0.222222	0.333333	0.434783	0.193548	0.159091	0.0612245	0.0555556	0.0545455	0.388889	0.296296	0.0705882	0.116667
PCPG_M990	0.421053	0.268293	0.25	0.1875	0.291667	0.113924	0.0434783	0.26087	0.269231	0.222222	0.0616438	0.421053	0.160714	0.149254	0.318182	0.127273	0.409091	0.102804	0.310345	1	0.259259	0.32	0.416667	0.266667	0.181818	0.06	0.0634921	0.0606061	0.3	0.333333	0.0697674	0.114754
SARC_M432	0.45	0.227273	0.28	0.176471	0.269231	0.097561	0.0869565	0.24	0.296296	0.206897	0.0608108	0.380952	0.135593	0.161765	0.347826	0.142857	0.434783	0.1	0.290323	0.416667	0.241379	0.346154	1	0.212121	0.173913	0.0576923	0.0542636	0.0598802	0.333333	0.310345	0.0961538	0.129032
BLCA_M200	1	0.222222	0.25	0.0416667	0	0.0612245	0.225	0.0625	0.2	0.0333333	0.038961	0.175	0.038961	0.333333	0.482759	0.28125	0.09375	0.176471	0.0344828	0.0625	0.0645161	0.148148	0.189189	0.0943396	0.315789	0.0277778	0.107143	0.0625	0.0857143	0.171429	0.0571429	0.107143
LIHC_M601	0.333333	0.35	0.172414	0.047619	0	0.0454545	0.170732	0.0487805	0.176471	0.0588235	0.0571429	0.171429	0.0422535	1	0.409091	0.25	0.0769231	0.129032	0.0402685	0.0769231	0.08	0.115385	0.151515	0.106383	0.157895	0.0384615	0.136364	0.12	0.0666667	0.129032	0.0689655	0.0422535
LUAD_M272	0.482759	0.307692	0.28125	0.0408163	0	0.0816327	0.222222	0.0606061	0.218182	0.0625	0.0540541	0.2	0.0384615	0.321429	1	0.4	0.109375	0.205882	0.0384615	0.0606061	0.0625	0.160714	0.285714	0.0714286	0.342105	0.0487805	0.103448	0.0606061	0.0545455	0.166667	0.0392157	0.142857
LUAD_M813	0.423077	0.4	0.346154	0.0465116	0	0.0930233	0.225	0.0344828	0.150943	0.0769231	0.04	0.235294	0.0416667	0.409091	1	0.5	0.0483871	0.15	0.04	0.0740741	0.0769231	0.18	0.258065	0.0740741	0.216216	0.0571429	0.130435	0.0740741	0.0612245	0.125	0.0444444	0.0689655
LUSC_M1075	0.28125	0.185185	0.344828	0.0333333	0.0222222	0.0625	0.232558	0.0285714	0.160714	0.0512821	0.0344828	0.243243	0.0338983	0.25	0.5	1	0.0645161	0.21875	0.0697674	0.0645161	0.0666667	0.148148	0.264706	0.1	0.195122	0.0789474	0.111111	0.037037	0.0769231	0.111111	0.0333333	0.0555556
BLCA_M252	1	0.0666667	0.05	0.166667	0.0374332	0.0740741	0.333333	0	0.5	0.02	0.0486111	0.0608696	0.0260417	0.0375587	0	0	0.0740741	0.016	0.571429	0	0.0701754	0.0769231	0.3125	0.0357143	0.0442478	0.142857	0.344828	0.0666667	0.466667	0.0777778	0.0540541	0.102564
HNSC_M1376	0.368421	0.045045	0.0294118	0.21875	0.030303	0.0384615	0.4	0.136364	1	0.0416667	0.047619	0.0327869	0.0483871	0.0344828	0.04	0.0625	0.09375	0.0294118	0.238095	0.0190476	0.031746	0.030303	0.1	0.025974	0.0416667	0.037037	0.264706	0.0740741	0.529412	0.0744681	0.0238095	0.0444444
HNSC_M752	0.5	0.0714286	0.0263158	0.194444	0.0412371	0.0571429	0.333333	0.115385	1	0.0294118	0.0460526	0.0569106	0.0454545	0.0409091	0.0344828	0.0555556	0.0833333	0.0283019	0.428571	0.0183486	0.0615385	0.0909091	0.208333	0.0381356	0.0413223	0.103448	0.382353	0.0645161	0.5	0.09375	0.0444444	0.0851064
PAAD_M694	0.571429	0.0769231	0.0689655	0.166667	0.05	0.0740741	0.263158	0.0125786	0.428571	0.047619	0.0486111	0.0608696	0.0416667	0.0424528	0	0.037037	0.0769231	0.0325203	1	0.02	0.0701754	0.166667	0.3125	0.0349345	0.0442478	0.142857	0.388889	0.0666667	0.466667	0.0898876	0.0540541	0.102564
UCEC_M417	0.466667	0.0952381	0.0689655	0.25	0.0319149	0.0740741	0.333333	0	0.529412	0.031746	0.0526316	0.042735	0.0416667	0.027907	0	0.0344828	0.0689655	0.020202	0.466667	0	0.0517241	0.04	0.235294	0.025974	0.0357143	0.0909091	0.258065	0.0545455	1	0.0777778	0.0263158	0.075
BLCA_M69	1	0.28125	0.176471	0.15	0	0.0571429	0.3	0.151899	0.37037	0.0930233	0.15625	0.0909091	0.189189	0.311111	0.289474	0.345455	0.217391	0.222222	0.157895	0.210526	0.0588235	0.233333	0.25	0.136095	0.454545	0.0555556	0.0517241	0.108108	0.142857	0.275	0.0779221	0.114286
HNSC_M508	0.37037	0.272727	0.294118	0.178571	0	0.0909091	0.227273	0.115385	1	0.0434783	0.142857	0.047619	0.1	0.6	0.241379	0.277778	0.131579	0.24	0.148148	0.0980392	0.0833333	0.2	0.294118	0.103448	0.458333	0.0416667	0.0434783	0.166667	0.0645161	0.263158	0.1	0.157895
LIHC_M575	0.275862	0.166667	0.222222	0.138889	0	0.0909091	0.227273	0.0789474	0.6	0.0512821	0.2	0.047619	0.047619	1	0.16129	0.210526	0.131579	0.24	0.107143	0.0980392	0.0789474	0.2	0.222222	0.103448	0.296296	0.0434783	0.047619	0.0769231	0.15	0.2	0.1	0.130435
STAD_M251	0.454545	0.242857	0.179487	0.155556	0	0.129032	0.310345	0.130435	0.458333	0.125	0.145161	0.0638298	0.166667	0.296296	0.342857	0.358491	0.227273	0.3125	0.135135	0.218182	0.0612245	0.296296	0.314286	0.117647	1	0.0707071	0.0444444	0.181818	0.138889	0.296296	0.0769231	0.178571
STAD_M788	0.2	0.285714	0.3125	0.142857	0	0.15	0.186047	0.166667	0.4375	0.0714286	0.15	0.0625	0.0714286	0.277778	0.206897	0.2	0.105263	0.171429	0.153846	0.0784314	0.0526316	0.16	0.235294	0.0689655	1	0.0444444	0.0384615	0.08	0.05	0.15	0.105263	0.136364
BLCA_M800	1	0.140625	0.388889	0.05	0	0.0714286	0.166667	0.142857	0.236842	0.0714286	0.0784314	0.133333	0.111111	0.166667	0.181818	0.0740741	0.157895	0.173913	0.375	0.131579	0.0416667	0.210526	0.125	0.0967742	0.466667	0.1	0.0454545	0.030303	0.206897	0.117647	0.0483871	0.0769231
PAAD_M1017	0.375	0.109375	0.277778	0.1	0	0.0454545	0.137931	0.157895	0.153846	0.0769231	0.0816327	0.133333	0.0434783	0.0833333	0.0909091	0.12	0.103448	0.136364	1	0.0789474	0.05	0.294118	0.173913	0.0666667	0.45	0.176471	0.05	0.0689655	0.178571	0.122449	0.0384615	0.0526316
READ_M1217	0.171429	0.106061	0.157895	0.0491803	0.0357143	0.0540541	0.129032	0.2	0.119048	0.0714286	0.0784314	0.16129	0.04	0.0769231	0.136364	0.2	0.1	0.117647	0.294118	0.0769231	0.0454545	1	0.16	0.0416667	0.409091	0.222222	0	0.0454545	0.129032	0.0754717	0.047619	0.047619
STAD_M1101	0.409091	0.19403	0.333333	0.0689655	0	0.0454545	0.235294	0.291667	0.227273	0.0571429	0.107143	0.131579	0.0571429	0.09375	0.222222	0.121212	0.177419	0.214286	0.45	0.142857	0.103448	0.409091	0.155556	0.0789474	1	0.208333	0.0652174	0.0526316	0.2	0.142857	0.0620155	0.0344828
STAD_M1300	0.466667	0.126984	0.352941	0.05	0.0384615	0.0571429	0.178571	0.375	0.25	0.0769231	0.0816327	0.103448	0.0769231	0.0833333	0.2	0.166667	0.105263	0.190476	0.106061	0.0930233	0.0952381	0.375	0.131579	0.103448	1	0.111111	0.05	0.047619	0.178571	0.111111	0.0406504	0.05
BRCA_M1115	0.285714	1	0.352941	0.0434783	0	0.0454545	0.0714286	0.190476	0.266667	0.125	0.136364	0.0740741	0.0512821	0.533333	0.529412	0.225	0.190476	0.333333	0.0405405	0.142857	0.05	0.277778	0.148148	0.37037	0.210526	0.0454545	0.0333333	0.0122951	0.0416667	0.3	0.0384615	0.166667
CESC_M533	0.269231	0.352941	1	0.05	0	0.0526316	0.08	0.294118	0.206897	0.142857	0.146341	0.0930233	0.0555556	0.428571	0.533333	0.294118	0.222222	0.26087	0.0571429	0.166667	0.0540541	0.25	0.12	0.259259	0.333333	0.0526316	0.0384615	0.0333333	0.037037	0.15	0.0136986	0.166667
LIHC_M578	0.178571	0.533333	0.428571	0.0465116	0	0.0384615	0.125	0.222222	0.206897	0.142857	0.146341	0.0930233	0.0555556	1	0.4375	0.222222	0.222222	0.318182	0.0606061	0.105263	0.0540541	0.428571	0.166667	0.307692	0.25	0.047619	0.0350877	0.0454545	0.037037	0.210526	0	0.166667
LUAD_M1258	0.2	0.529412	0.533333	0.0434783	0	0.0454545	0.0714286	0.190476	0.225806	0.166667	0.136364	0.0869565	0.0512821	0.4375	1	0.195122	0.25	0.391304	0.0547945	0.142857	0.05	0.277778	0.148148	0.275862	0.277778	0.0454545	0.0333333	0.0416667	0.0416667	0.181818	0.0134228	0.142857
READ_M798	0.137931	0.277778	0.25	0.0384615	0	0.05	0.08	0.222222	0.166667	0.142857	0.0930233	0.0930233	0.0526316	0.428571	0.277778	0.179487	0.157895	0.26087	0.0606061	0.166667	0.0540541	1	0.0769231	0.172414	0.25	0.0454545	0	0.0526316	0	0.0952381	0.037037	0.105263
BRCA_M1116	0.315789	1	0.230769	0.075	0.0909091	0	0.352941	0.113208	0.0909091	0.0526316	0.0434783	0.0384615	0.12	0.192308	0.45	0.12	0.146341	0.5	0.153846	0.047619	0.0416667	0.0731707	0.333333	0.0961538	0.170213	0.0465116	0.0416667	0.0151515	0.166667	0.2	0.0338983	0.0681818
ESCA_M389	0.25	0.272727	0.32	0.109091	0.0649351	0.0344828	1	0.131868	0.32	0.043956	0.0294118	0.0326087	0.15	0.130952	0.342857	0.291139	0.226415	0.411765	0.156863	0.0425532	0.0408163	0.137931	0.366667	0.119403	0.258621	0.075	0.0243902	0.030303	0.121951	0.231884	0.0333333	0.101695
LUAD_M174	0.25	0.45	0.292683	0.0909091	0.0740741	0.037037	0.342857	0.103448	0.152174	0.0465116	0.0333333	0.0344828	0.1	0.2	1	0.155844	0.209302	0.458333	0.129032	0.0430108	0.0344828	0.0888889	0.318182	0.0877193	0.176471	0.0416667	0.0322581	0.0377358	0.137931	0.208333	0.03125	0.0833333
OV_M1382	0.285714	0.5	0.35	0.113636	0.0714286	0.037037	0.411765	0.12069	0.173913	0.0454545	0.0357143	0.0338983	0.133333	0.15625	0.458333	0.216216	0.232558	1	0.2	0.0425532	0.0333333	0.111111	0.5	0.105263	0.244898	0.0689655	0.03125	0.037037	0.172414	0.25	0.0307692	0.12766
SARC_M446	0.24	0.333333	0.230769	0.075	0.0454545	0	0.375	0.0925926	0.170732	0.0526316	0.04	0.0384615	0.12	0.24	0.318182	0.135135	0.205128	0.5	0.153846	0.047619	0.0416667	0.128205	1	0.0769231	0.170213	0.0869565	0.08	0.0322581	0.12	0.333333	0.037037	0.0681818
BRCA_M236	0.357143	1	0.369565	0.129032	0.025641	0	0.258065	0.333333	0.258065	0.324324	0.0961538	0.0810811	0.230769	0.394737	0.444444	0.344828	0.0934579	0.28125	0.146341	0.16129	0.0540541	0.193548	0.176471	0.0943396	0.25	0.09375	0.0277778	0.0363636	0.0636364	0.354839	0.0769231	0.157895
BRCA_M804	0.352941	1	0.2	0.115385	0	0.0384615	0.2	0.285714	0.333333	0.259259	0.105263	0.0769231	0.178571	0.266667	0.6	0.411765	0.0625	0.238095	0.103448	0.105263	0.0909091	0.208333	0.166667	0.0529801	0.176471	0.0526316	0	0.0526316	0.0408163	0.35	0.125	0.115385
LUAD_M1259	0.285714	0.6	0.191176	0.137931	0	0.0645161	0.333333	0.347826	0.333333	0.266667	0.0952381	0.0697674	0.193548	0.354839	1	0.4	0.0816327	0.2	0.16129	0.136364	0.0769231	0.178571	0.208333	0.0723684	0.294118	0.0909091	0.04	0.037037	0.06	0.47619	0.107143	0.137931
LUSC_M766	0.227273	0.411765	0.173913	0.137931	0	0.0434783	0.272727	0.275862	0.4	0.266667	0.0952381	0.12	0.233333	0.354839	0.4	1	0.0707071	0.206897	0.125	0.136364	0.0769231	0.222222	0.115385	0.0794702	0.222222	0.0571429	0.0425532	0.0434783	0.06	0.347826	0.0487805	0.135135
UCS_M401	0.25	0.354839	0.166667	0.125	0	0.0333333	0.291667	0.25	0.24	0.205882	0.113636	0.0571429	0.142857	0.363636	0.47619	0.347826	0.0686275	0.178571	0.147059	0.166667	0.0689655	0.125	0.142857	0.0779221	0.205128	0.08	0.0357143	0.0384615	0.0480769	1	0.0625	0.125
BRCA_M549	0.119048	1	0.125	0.038961	0.0588235	0.075	0.321429	0.0857143	0.151515	0.0576923	0.0588235	0.0714286	0.104167	0.156863	0.1875	0.190476	0.119048	0.535714	0.179487	0.0769231	0.0434783	0.0789474	0.37037	0.105882	0.0930233	0.0253165	0.0612245	0.0425532	0.235294	0.341463	0.0377358	0.0588235
ESCA_M186	0.107143	0.321429	0.235294	0.047619	0.1	0.12	1	0.0967742	0.210526	0.0810811	0.0740741	0.111111	0.0952381	0.157895	0.0754717	0.118421	0.0666667	0.473684	0.0609756	0.0714286	0.05	0.0792079	0.375	0.0821918	0.121212	0.08	0.0294118	0.047619	0.285714	0.25	0.0344828	0.1
OV_M603	0.15625	0.535714	0.173913	0.0441176	0.0677966	0.133333	0.473684	0.0909091	0.208333	0.0697674	0.0606061	0.0909091	0.0769231	0.190476	0.0862069	0.151899	0.0857143	1	0.0689655	0.0408163	0.0384615	0.0849057	0.473684	0.0759494	0.102564	0.0322581	0.0444444	0.0384615	0.32	0.4375	0.0412371	0.08
SARC_M1066	0.148148	0.37037	0.097561	0.05	0.0555556	0.166667	0.375	0.0967742	0.15	0.0810811	0.05	0.111111	0.0555556	0.222222	0.0754717	0.103896	0.103448	0.473684	0.0689655	0.0714286	0.05	0.0686275	1	0.0675676	0.121212	0.04	0.0789474	0.047619	0.35	0.290323	0.0326087	0.105263
UCS_M72	0.0888889	0.341463	0.114286	0.0540541	0.0714286	0.0697674	0.25	0.0576923	0.138889	0.0545455	0.0377358	0.0666667	0.0566038	0.127273	0.0675676	0.131868	0.0638298	0.4375	0.05	0.0681818	0.028169	0.0762712	0.290323	0.0777778	0.0769231	0.0365854	0.0535714	0.025641	0.216216	1	0.0272727	0.0540541
CESC_M1393	0.0833333	0.09375	1	0.115385	0	0.0322581	0.08	0.0357143	0.0967742	0.08	0.0454545	0.0638298	0.25	0.0273973	0.421053	0.478261	0.333333	0.290323	0.0574713	0.125	0.0454545	0.0851064	0.03125	0.142857	0.28125	0.0232558	0.0384615	0.0689655	0.0810811	0.333333	0.0416667	0.0740741
CESC_M716	0.0869565	0.0697674	1	0.0930233	0	0.0253165	0.113043	0.0382166	0.125	0.0555556	0.0555556	0.121951	0.16129	0.0526316	0.310345	0.5	0.30303	0.342105	0.0618557	0.0857143	0.0363636	0.107143	0.0263158	0.202899	0.238095	0	0.027027	0.05	0.0625	0.264706	0.0909091	0.0704225
LUAD_M774	0.0588235	0.103448	0.421053	0.1	0	0.04	0.0434783	0.0454545	0.0333333	0.0909091	0.102564	0.0681818	0.222222	0.0294118	1	0.55	0.45	0.285714	0.0909091	0.142857	0.0487805	0.139535	0.0344828	0.0833333	0.380952	0.0240964	0.0454545	0.0769231	0.0512821	0.318182	0.030303	0.130435
LUSC_M775	0.075	0.0540541	0.5	0.111111	0	0	0.1	0.0392157	0.0333333	0.0689655	0.0638298	0.0588235	0.16	0.0392157	0.55	1	0.333333	0.333333	0.0689655	0.107143	0.0416667	0.170213	0.0277778	0.169231	0.285714	0.0222222	0.0222222	0.0606061	0.0731707	0.333333	0.0740741	0.08
MESO_M525	0.0487805	0.0571429	0.333333	0.151515	0	0.0333333	0.0438596	0.037037	0.0285714	0.0740741	0.0909091	0.06	0.173913	0.0344828	0.45	0.333333	1	0.230769	0.0561798	0.16	0.0365854	0.102041	0.025	0.0921053	0.259259	0.0227273	0.037037	0.0645161	0.0454545	0.259259	0.0392157	0.107143
ESCA_M1170	0.208333	0.0333333	0.192308	0.275	0	0.0344828	1	0.0645161	0.0740741	0.458333	0.03125	0.289474	0.0833333	0.423077	0.384615	0.208333	0.0857143	0.192308	0.117647	0.258065	0.0133929	0.365854	0.0526316	0.0806452	0.0645161	0.0810811	0.0333333	0.047619	0.0344828	0.115385	0.027027	0.227273
KICH_M957	0.238095	0.0135135	0.166667	0.2	0	0.0384615	0.458333	0.0714286	0.04	1	0.0454545	0.285714	0.0909091	0.478261	0.5	0.145833	0.09375	0.275862	0.166667	0.2	0	0.292683	0.0636364	0.0666667	0.0333333	0.0882353	0.0384615	0.0677966	0.039604	0.0833333	0.0344828	0.275
LIHC_M537	0.272727	0.0333333	0.2	0.219512	0.0454545	0.0588235	0.423077	0.0666667	0.0576923	0.478261	0.0294118	0.263158	0.0857143	1	0.346154	0.163265	0.0882353	0.2	0.121212	0.266667	0.0444444	0.309524	0.0530973	0.0645161	0.0344828	0.057971	0.0322581	0.0588235	0.047619	0.12	0.0344828	0.232558
LUAD_M751	0.35	0.0337079	0.208333	0.225	0	0.0416667	0.384615	0.0689655	0.125	0.5	0.111111	0.27027	0.0882353	0.346154	1	0.142857	0.173913	0.407407	0.2	0.275862	0.05	0.285714	0.0625	0.0714286	0.078125	0.0857143	0.0263158	0.0491803	0.0380952	0.0496454	0.0357143	0.209302
OV_M638	0.192308	0.0322581	0.117647	0.104167	0	0.0384615	0.176471	0.0645161	0.0689655	0.275862	0.0967742	0.108696	0.0363636	0.181818	0.407407	0.0277778	0.107143	1	0.142857	0.108108	0.0588235	0.183673	0.0555556	0.0625	0.057971	0.028169	0.025	0.0625	0.0272727	0.0689655	0.0333333	0.142857
GBM_M443	0.0434783	0.0144928	0.166667	0.102564	0.236364	0.03125	0.0325733	1	0.0357143	0.0387597	0.371429	0.392857	0.368421	0.107143	0.030303	0.478261	0.0454545	0	0.038961	0.340909	0.15625	0.270833	0.0229885	0.035461	0.481481	0.0277778	0.027027	0.0967742	0.0465116	0.0363636	0.0294118	0.15
KIRC_M187	0.0357143	0.047619	0.189189	0.0909091	0.25	0.05	0.0234899	0.36	0.0384615	0.0212766	1	0.421053	0.222222	0.0769231	0.0248447	0.466667	0.0363636	0	0.0333333	0.217391	0.315789	0.225	0	0.0333333	0.473684	0.0253165	0.04	0.0545455	0.0363636	0.0434783	0.0454545	0.133333
KIRP_M496	0.0512821	0.0384615	0.361111	0.2	0.25	0.0384615	0.043771	0.392857	0.0322581	0.016	0.421053	1	0.323529	0.0934579	0.0333333	0.5	0.0555556	0.012766	0.0355556	0.32	0.25	0.285714	0.0689655	0.153846	0.5	0.0425532	0.107143	0.08	0.0625	0.0357143	0	0.0833333
LUSC_M267	0.0588235	0.047619	0.189189	0.107143	0.25	0.05	0.0333333	0.478261	0.0384615	0.0252101	0.466667	0.5	0.25	0.0769231	0.04	1	0.05	0	0.027027	0.272727	0.25	0.225	0.0133333	0.0454545	0.555556	0.0285714	0.0115607	0.1	0.047619	0.0434783	0.0454545	0.0967742
STAD_M1134	0.0606061	0.0333333	0.190476	0.15625	0.215686	0.037037	0.047619	0.481481	0.0322581	0.0406504	0.473684	0.5	0.277778	0.102804	0.037037	0.555556	0.0677966	0.03125	0.030837	0.36	0.192308	0.27907	0.0322581	0.0740741	1	0.0235294	0.0322581	0.12	0.0408163	0.0325581	0.0357143	0.176471
LUAD_M179	0.166667	0.230769	0.25	0.0909091	0	0.0454545	0.35	0.0397351	0.185185	0.0416667	0.0384615	0.0434783	0.0909091	0.0746269	1	0.5	0.333333	0.565217	0.0746269	0.0526316	0.0384615	0.101449	0.125	0.0465116	0.166667	0.037037	0	0	0.210526	0.209302	0.0454545	0.0625
LUSC_M705	0.171429	0.196078	0.219512	0.0888889	0.0285714	0.0309278	0.37931	0.0365854	0.153846	0.0314961	0.0344828	0.0277778	0.0882353	0.0759494	0.5	1	0.233333	0.633333	0.0759494	0.06	0.0277778	0.1125	0.115385	0.0510204	0.142857	0.0277778	0.0277778	0.0298507	0.137255	0.27451	0.0285714	0.0655738
OV_M1383	0.19697	0.178571	0.309524	0.08	0	0.0294118	0.216216	0.0487805	0.138889	0.0363636	0.05	0.05	0.235294	0.111111	0.419355	0.540541	0.2	1	0.0714286	0.0638298	0.025	0.119048	0.211538	0.0693069	0.12766	0.032967	0.030303	0.0240964	0.205882	0.372549	0.025	0.0606061
OV_M1945	0.151515	0.183673	0.205128	0.0697674	0	0.0319149	0.233333	0.04375	0.135135	0.0288462	0.0625	0.0625	0.0363636	0.0649351	0.565217	0.633333	0.214286	1	0.0649351	0.0416667	0.030303	0.131579	0.122449	0.0416667	0.125	0.030303	0.030303	0.0285714	0.122449	0.291667	0.03125	0.0540541
OV_M2146	0.16	0.113636	0.117647	0.0571429	0.0110497	0.0384615	0.217391	0.0333333	0.137931	0.037037	0.0434783	0.0416667	0.0384615	0.028169	0.5	0.428571	0.190476	1	0.0487805	0.0512821	0.037037	0.084507	0.121951	0.0416667	0.125	0.0416667	0.04	0.0384615	0.0697674	0.232558	0.0434783	0.0454545
BLCA_M1249	1	0.533333	0.162791	0.272727	0	0.0833333	0.214286	0.178571	0.833333	0.130435	0.09375	0.0816327	0.118644	0.166667	0.1	0.5	0.136364	0.236842	0.166667	0.1	0.277778	0.285714	0.047619	0.277778	0.206897	0.08	0.0606061	0.0625	0.189189	0.15	0.0681818	0.162162
BRCA_M743	0.533333	1	0.139535	0.28125	0.0952381	0.0869565	0.269231	0.0952381	0.615385	0.0666667	0.0735294	0.105263	0.10101	0.142857	0.0909091	0.4375	0.0952381	0.15	0.170213	0.105263	0.294118	0.3	0.0487805	0.222222	0.307692	0.0833333	0.0625	0.1	0.228571	0.111111	0.0714286	0.105263
HNSC_M651	0.833333	0.615385	0.142857	0.25	0	0.0909091	0.230769	0.148148	1	0.142857	0.0746269	0.111111	0.105263	0.146341	0.0526316	0.571429	0.1	0.184211	0.148936	0.111111	0.3125	0.315789	0.05	0.3125	0.222222	0.0869565	0.0645161	0.0666667	0.166667	0.166667	0.0465116	0.138889
LUSC_M1419	0.5	0.4375	0.136364	0.235294	0	0.0487805	0.214286	0.1	0.571429	0.0612245	0.0724638	0.1	0.1	0.166667	0.025641	1	0.0869565	0.119048	0.12	0.08	0.277778	0.285714	0.047619	0.15	0.206897	0.08	0.0606061	0.0625	0.157895	0.15	0.0444444	0.131579
BLCA_M1382	1	0.0454545	0.466667	0.2	0.0110497	0.135593	0.294118	0.0784314	0.347826	0.176471	0.181818	0	0.142857	0.375	0.159091	0.25	0.333333	0.233333	0.166667	0.05	0.0444444	0.0606061	0.368421	0.35	0.209302	0.038961	0.047619	0.0526316	0.466667	0.368421	0.0150376	0.0909091
CESC_M487	0.466667	0.0333333	1	0.181818	0	0.112903	0.263158	0.0754717	0.269231	0.157895	0.12	0.037037	0.133333	0.411765	0.12766	0.227273	0.294118	0.21875	0.2	0.0454545	0	0.0357143	0.333333	0.26087	0.24	0.0416667	0.0434783	0.047619	0.333333	0.4	0.0357143	0.0869565
LIHC_M607	0.375	0.0333333	0.411765	0.238095	0.0434783	0.0952381	0.2	0.0754717	0.222222	0.157895	0.12	0.037037	0.133333	1	0.152174	0.173913	0.222222	0.147059	0.2	0.0454545	0.047619	0.047619	0.333333	0.208333	0.192308	0.0344828	0.0454545	0.0606061	0.333333	0.272727	0	0.0638298
UCEC_M788	0.466667	0.047619	0.333333	0.238095	0.0434783	0.112903	0.263158	0.0961538	0.269231	0.157895	0.166667	0.037037	0.133333	0.333333	0.177778	0.227273	0.294118	0.21875	0.153846	0.0384615	0.1	0.0571429	0.272727	0.318182	0.24	0.0333333	0.0434783	0.047619	1	0.272727	0.0148148	0.0952381
BLCA_M142	1	0.278539	0.281879	0.108571	0.138889	0.0501253	0.396694	0.125	0.478571	0.078125	0.105634	0.151786	0.151394	0.197605	0.184524	0.286822	0.280612	0.252174	0.118644	0.15748	0.0979592	0.241573	0.172727	0.123596	0.235772	0.0566038	0.102564	0.0396825	0.147059	0.201439	0.0869565	0.179688
CESC_M30	0.339806	0.257353	1	0.0882353	0.0992908	0.0487805	0.333333	0.0909091	0.404255	0.0909091	0.0724638	0.0732759	0.119266	0.171779	0.137725	0.198473	0.253886	0.245098	0.116667	0.078125	0.0923077	0.184358	0.121495	0.123457	0.162602	0.0530303	0.0449438	0.0352113	0.15748	0.17037	0.0841121	0.145161
ESCA_M187	0.396694	0.318584	0.384615	0.116438	0.146552	0.0549451	1	0.114943	0.442623	0.0909091	0.0956522	0.146465	0.123596	0.233577	0.170455	0.238532	0.25	0.313953	0.0978261	0.137255	0.0916031	0.24183	0.272727	0.0851064	0.222222	0.0519481	0.0760234	0.0416667	0.136364	0.193548	0.105882	0.2
HNSC_M83	0.478571	0.334884	0.404255	0.0864865	0.171233	0.046875	0.442623	0.152439	1	0.075	0.0860927	0.152174	0.108614	0.189655	0.256098	0.320611	0.309645	0.290598	0.111111	0.107914	0.0866142	0.193717	0.214286	0.106061	0.303279	0.0544218	0.0882353	0.037594	0.189781	0.208333	0.0731707	0.218978
BLCA_M195	1	0.193548	0.43662	0.117647	0.33945	0.0675676	0.333333	0.037037	0.274194	0.057971	0.0895522	0.191176	0.0322581	0.275862	0.216667	0.328571	0.144928	0.251748	0.247312	0.43	0.2	0.354167	0.21875	0.126761	0.189189	0.136986	0.028169	0.0447761	0.296875	0.188406	0.0375	0.104478
CESC_M135	0.43662	0.166667	1	0.132075	0.25	0.05	0.403509	0.0377358	0.23913	0.0483871	0.0754717	0.181818	0.0338983	0.269231	0.166667	0.241935	0.125	0.207407	0.309091	0.295918	0.148148	0.295455	0.169811	0.122807	0.2	0.0634921	0.0327869	0.0420168	0.288462	0.269231	0.037037	0.137255
ESCA_M175	0.333333	0.209302	0.403509	0.102041	0.350877	0.0363636	1	0.113636	0.307692	0.0350877	0.0851064	0.134615	0.0273973	0.186667	0.282051	0.365385	0.0853659	0.244444	0.294118	0.222222	0.166667	0.270588	0.166667	0.137255	0.269231	0.0517241	0.0363636	0.0442478	0.297872	0.22449	0.0384615	0.106383
PCPG_M119	0.43	0.151163	0.295918	0.0724638	0.285714	0.0217391	0.264045	0.0737705	0.155556	0.0552147	0.0425532	0.177778	0.0326087	0.295238	0.18018	0.268817	0.182609	0.228916	0.177083	1	0.170455	0.280992	0.216495	0.129032	0.153061	0.186813	0.0226244	0.0443038	0.148936	0.138298	0.0384615	0.0909091
BLCA_M366	1	0.179104	0.176471	0.125	0.121951	0.155556	0.157895	0.121622	0.441176	0	0.0333333	0.181818	0.122449	0.181818	0.191781	0.16	0.213115	0.315789	0.1	0.148649	0.196429	0.0888889	0.340909	0.317073	0.282609	0.0392157	0.177778	0.0555556	0.257143	0.116279	0.0232558	0.05
HNSC_M206	0.441176	0.2	0.28125	0.206897	0.0909091	0.269231	0.3	0.163636	1	0.0357143	0.025641	0.269231	0.125	0.222222	0.172414	0.21875	0.195652	0.347826	0.190476	0.118644	0.125	0.190476	0.37931	0.4	0.25	0.0625	0.133333	0.0555556	0.470588	0.0547945	0.0277778	0.047619
OV_M158	0.315789	0.12963	0.272727	0.16129	0.0701754	0.214286	0.173913	0.192308	0.347826	0.0344828	0.0384615	0.214286	0.0882353	0.259259	0.15	0.176471	0.191489	1	0.181818	0.111111	0.163636	0.181818	0.366667	0.241379	0.28125	0.0384615	0.25	0.04	0.444444	0.0540541	0.0273973	0.0465116
UCEC_M404	0.272727	0.145833	0.285714	0.25	0.0784314	0.333333	0.235294	0.190476	0.470588	0.0434783	0.05	0.217391	0.107143	0.217391	0.145455	0.214286	0.28	0.444444	0.25	0.142857	0.102564	0.176471	0.388889	0.375	0.206897	0.0357143	0.208333	0.0280374	1	0.05	0.0434783	0.0540541
BLCA_M483	1	0.45	0.233333	0.113636	0	0.037037	0.157895	0.263158	0.136364	0.0606061	0.0454545	0.2	0.133333	0.222222	0.228571	0.157895	0.117647	0.205128	0.2	0.0434783	0.0434783	0.15	0.178571	0.171429	0.118644	0.0333333	0.0416667	0	0.0454545	0.103448	0.0638298	0.102564
BRCA_M1135	0.210526	1	0.16129	0.105263	0	0.125	0.3125	0.15	0.0909091	0.0967742	0.0531915	0.277778	0.0645161	0.103448	0.235294	0.160714	0.0967742	0.243243	0.4375	0.05	0.0645161	0.227273	0.142857	0.212121	0.368421	0.0344828	0.0357143	0.0169492	0.04	0.1	0.0888889	0.0666667
BRCA_M543	0.45	1	0.272727	0.1	0	0.1	0.197368	0.318182	0.111111	0.102041	0.0769231	0.208333	0.147059	0.1875	0.371429	0.267857	0.228571	0.3	0.45	0.0384615	0.0540541	0.222222	0.225806	0.243243	0.28	0.0909091	0.0344828	0.0285714	0.0606061	0.09375	0.1	0.0909091
PAAD_M577	0.2	0.45	0.233333	0.157895	0.0416667	0.12	0.294118	0.2	0.25	0.09375	0.0952381	0.263158	0.0967742	0.137931	0.30303	0.178571	0.151515	0.27027	1	0.03125	0.0625	0.210526	0.32	0.171429	0.285714	0.0689655	0.037037	0.0344828	0.0520833	0.111111	0.0909091	0.105263
BLCA_M534	1	0.285714	0.269231	0.0606061	0	0.03125	0.142857	0.170732	0.5	0.193548	0.111111	0.0909091	0.129032	0.178571	0.2	0.296296	0.129032	0.3125	0.0625	0.133333	0.04	0.137931	0.142857	0.236842	0.269231	0.03125	0.037037	0.0588235	0.0526316	0.16129	0.0491803	0.209302
HNSC_M1506	0.5	0.266667	0.243902	0.0571429	0.0263158	0.0294118	0.166667	0.162791	1	0.147059	0.0930233	0.0877193	0.121212	0.206897	0.225806	0.266667	0.121212	0.294118	0.0606061	0.0909091	0.0384615	0.166667	0.136364	0.25641	0.296296	0.0340136	0.0277778	0.0555556	0.0277778	0.151515	0.047619	0.227273
HNSC_M1662	0.466667	0.172414	0.27027	0.0645161	0.0294118	0.0333333	0.138889	0.179487	1	0.129032	0.102564	0.0645161	0.137931	0.155556	0.142857	0.259259	0.078125	0.25	0.0666667	0.1	0.0212766	0.136364	0.15	0.184211	0.192308	0.03125	0.025	0.0625	0.03125	0.133333	0.0508475	0.190476
HNSC_M983	0.432432	0.228571	0.217391	0.05	0.025641	0.025641	0.146341	0.145833	1	0.128205	0.130435	0.135135	0.135135	0.176471	0.194444	0.228571	0.105263	0.25641	0.0714286	0.105263	0.0350877	0.142857	0.145833	0.227273	0.25	0.05	0.025974	0.0487805	0.0444444	0.131579	0.0441176	0.204082
BLCA_M757	1	0.259259	0.45	0.075	0.318182	0.0344828	0.0714286	0.181818	0.388889	0.0714286	0.1	0.111111	0.0483871	0.0967742	0.230769	0.363636	0.0833333	0.352941	0.333333	0.04	0.0307692	0.291667	0.277778	0.212121	0.333333	0	0.121212	0.0350877	0.176471	0.24	0.1	0.0740741
CESC_M527	0.45	0.258065	1	0.0666667	0.307692	0.037037	0.0775862	0.148148	0.428571	0.0638298	0.0384615	0.09375	0.0447761	0.114286	0.261905	0.521739	0.0731707	0.272727	0.178571	0.037037	0.037037	0.285714	0.272727	0.216216	0.318182	0.0344828	0.0769231	0.0322581	0.153846	0.285714	0.0888889	0.0625
HNSC_M976	0.388889	0.206897	0.428571	0.047619	0.25	0.00911854	0.0521739	0.173913	1	0.0697674	0.0625	0.107143	0.0357143	0.08	0.225	0.347826	0.0526316	0.263158	0.26087	0.0357143	0.0227273	0.185185	0.142857	0.171429	0.25	0.0434783	0.0555556	0.0454545	0.138889	0.230769	0.0833333	0.0714286
LUSC_M586	0.363636	0.25	0.521739	0.0652174	0.25	0.0357143	0.0677966	0.102041	0.347826	0.0588235	0.05	0.1	0.0512821	0.111111	0.285714	1	0.0714286	0.208333	0.172414	0.0357143	0.0357143	0.233333	0.16	0.243243	0.363636	0	0.075	0.037037	0.15	0.193548	0.111111	0.0606061
BRCA_M1344	0.388889	1	0.0882353	0.0625	0	0.166667	0.296296	0.142857	0.217391	0.166667	0.24	0.175	0.0606061	0.162791	0.2	0.25	0.0434783	0.272727	0.0434783	0.0416667	0.243243	0.2	0.222222	0.0909091	0.5	0.0606061	0.0289855	0.0235294	0.16	0.0869565	0.0454545	0.142857
STAD_M1053	0.227273	0.5	0.0833333	0.027027	0	0.111111	0.193548	0.0666667	0.233333	0.1	0.1	0.0888889	0.0588235	0.106383	0.15625	0.28	0.0387097	0.208333	0.037037	0.03125	0.170732	0.219512	0.121951	0.111111	1	0.0322581	0.0298507	0.037037	0.0689655	0.0625	0.0434783	0.0967742
STAD_M1282	0.235294	0.5	0.0645161	0.020979	0	0.142857	0.25	0.0416667	0.192308	0.0555556	0.08	0.075	0.0322581	0.0952381	0.114754	0.3	0.0526316	0.181818	0.0526316	0.015748	0.166667	0.133333	0.111111	0.08	1	0.037037	0.0285714	0	0.0422535	0.05	0.0526316	0.12
STAD_M570	0.393939	0.428571	0.166667	0.0697674	0	0.142857	0.27027	0.138889	0.290323	0.125	0.102564	0.134615	0.0491803	0.127273	0.253731	0.27027	0.1	0.387755	0.0789474	0.0333333	0.288889	0.294872	0.2	0.111111	1	0.0285714	0.025974	0.027027	0.108108	0.0882353	0.0357143	0.1
BRCA_M181	0.0769231	1	0.26087	0.037037	0.0740741	0.0204082	0.0606061	0.0444444	0.12	0.0666667	0.0555556	0.0344828	0.030303	0.0465116	0.1	0.0917431	0.0465116	0.473684	0.04	0.0666667	0.037037	0.333333	0.0357143	0.0625	0.4	0	0.030303	0.0263158	0	0.0769231	0	0.037037
OV_M899	0.111111	0.473684	0.235294	0.05	0.105263	0.0222222	0.125	0.0540541	0.116279	0.0909091	0.0714286	0.047619	0.04	0.0571429	0.119048	0.0882353	0.0571429	1	0.047619	0.0769231	0.05	0.428571	0.05	0.0833333	0.538462	0.047619	0.05	0.05	0	0.0967742	0	0.0416667
READ_M753	0.08	0.333333	0.3125	0.0434783	0.105263	0	0.0526316	0.0540541	0.0909091	0.0909091	0.047619	0.0526316	0.05	0.0571429	0.0930233	0.0776699	0.0526316	0.428571	0.047619	0.025	0.0338983	1	0.05	0.0666667	0.538462	0.1	0	0	0	0.05	0.04	0.05
STAD_M332	0.08	0.4	0.235294	0.05	0	0.0222222	0.0384615	0.0540541	0.142857	0.0909091	0.047619	0.0454545	0.04	0.0571429	0.0930233	0.0882353	0.0571429	0.538462	0.047619	0.0566038	0.05	0.538462	0.05	0.0434783	1	0.047619	0.0277778	0	0	0.0625	0	0.0416667
BRCA_M846	0.2	1	0.264706	0.0740741	0.3	0.047619	0.35	0.217391	0.115385	0.0952381	0.0454545	0.0967742	0.0333333	0.030303	0.470588	0.296296	0.0434783	0.571429	0.0382166	0.1	0.0465116	0.136364	0.285714	0.15	0.162162	0.0714286	0.0454545	0.125	0.2	0.0689655	0.0869565	0.210526
LUAD_M160	0.315789	0.470588	0.257143	0.0714286	0.290323	0.0454545	0.4	0.16	0.304348	0.119048	0.107143	0.115385	0.0487805	0.0689655	1	0.5	0.0869565	0.352941	0.08	0.15	0.0454545	0.130435	0.272727	0.0909091	0.157895	0.0689655	0.04	0.12	0.24	0.142857	0.0833333	0.333333
LUSC_M478	0.206897	0.296296	0.255814	0.0526316	0.25	0.05	0.266667	0.102564	0.333333	0.0961538	0.0789474	0.114286	0.0434783	0.097561	0.5	1	0.0606061	0.25	0.15625	0.137931	0.037037	0.111111	0.266667	0.0625	0.125	0.0512821	0.031746	0.0857143	0.138889	0.235294	0.0784314	0.214286
OV_M1461	0.157895	0.571429	0.205882	0.0454545	0.193548	0.0526316	0.315789	0.181818	0.125	0.08	0.05	0.0666667	0.05	0.0322581	0.352941	0.222222	0.047619	1	0.0384615	0.111111	0.0133333	0.15	0.25	0.05	0.171429	0.0491803	0.04	0.136364	0.166667	0.0740741	0.0952381	0.166667
BRCA_M882	0.15493	1	0.142857	0.272727	0	0.0434783	0.25	0.115385	0.259259	0.136364	0.08	0.142857	0.04	0.333333	0.25	0.255814	0.24	0.411765	0.206897	0.04	0.101449	0.208333	0.25	0.12	0.259259	0.0625	0.0416667	0.0344828	0.0923077	0.521739	0.106061	0.0789474
OV_M762	0.114286	0.411765	0.0638298	0.2	0	0.05	0.291667	0.0869565	0.153846	0.105263	0.0625	0.176471	0.0952381	0.333333	0.186047	0.190476	0.173913	1	0.107143	0.0689655	0.0746269	0.136364	0.235294	0.142857	0.2	0.047619	0.0465116	0.047619	0.0795455	0.409091	0.078125	0.0526316
UCS_M308	0.155844	0.521739	0.0882353	0.206897	0.0222222	0.0333333	0.2	0.16129	0.242424	0.131783	0.0625	0.148148	0.0625	0.291667	0.24	0.270833	0.1875	0.409091	0.135135	0.037037	0.0930233	0.176471	0.185185	0.114865	0.242424	0.0806452	0.0526316	0.0333333	0.115789	1	0.0958904	0.0666667
UCS_M913	0.123288	0.473684	0.0909091	0.217391	0	0.0434783	0.153846	0.0740741	0.259259	0.117647	0.08	0.0434783	0.08	0.333333	0.195652	0.2	0.107143	0.08	0.166667	0.0425532	0.0810811	0.178571	0.136364	0.0821918	0.15	0.0625	0.0425532	0.0344828	0.0923077	1	0.057971	0.0789474
CESC_M313	0.244444	0.280443	1	0.109375	0.157895	0.060686	0.401434	0.192857	0.436464	0.0766129	0.108108	0.0823045	0.340909	0.166667	0.36338	0.185484	0.219672	0.275641	0.224	0.186441	0.126482	0.156	0.214286	0.207358	0.0204082	0.0569106	0.268199	0.121457	0.229391	0.152	0.171244	0.0566802
ESCA_M29	0.269036	0.34375	0.401434	0.167665	0.193939	0.0522876	1	0.225	0.405172	0.1125	0.10625	0.122581	0.373057	0.213018	0.295082	0.28125	0.269058	0.292887	0.284024	0.248804	0.178344	0.234568	0.287179	0.219731	0.0218579	0.089172	0.337017	0.175	0.245098	0.213415	0.15009	0.0903955
HNSC_M18	0.252174	0.236422	0.436464	0.097973	0.124138	0.0806846	0.338509	0.191083	1	0.0622837	0.106029	0.0706714	0.30033	0.155709	0.323232	0.163763	0.204678	0.269565	0.189003	0.174699	0.109215	0.146341	0.221865	0.175953	0.0276817	0.0526316	0.232558	0.108392	0.204403	0.13468	0.175115	0.0522876
HNSC_M192	0.292453	0.317757	0.397306	0.140625	0.188172	0.0703518	0.405172	0.200893	1	0.0978261	0.0976864	0.106145	0.389423	0.192708	0.321767	0.258242	0.242915	0.300781	0.275132	0.223176	0.161111	0.217391	0.255708	0.22314	0.0179211	0.0833333	0.310345	0.15847	0.246637	0.179894	0.151832	0.0742574
CESC_M406	0.4	0.333333	1	0.0769231	0.5	0.0952381	0.0816327	0.125	0.163636	0.0606061	0.166667	0.0434783	0.1	0.111111	0.24	0.25	0.15	0.6875	0.0909091	0.04	0.4375	0.15625	0.257143	0.222222	0.153846	0.0348837	0.115385	0.0833333	0.25	0.0813953	0.0714286	0.105263
COAD_M27	0.333333	0.24	0.5	0.017341	1	0.0151515	0.0333333	0.0526316	0.105263	0.0652174	0.0344828	0.0465116	0.111111	0.176471	0.111111	0.307692	0.157895	0.529412	0.0454545	0.0322581	0.692308	0.16129	0.131579	0.148148	0	0.0606061	0.0526316	0.0869565	0.115385	0.0574713	0.0740741	0.111111
OV_M844	0.368421	0.37037	0.6875	0.0681818	0.529412	0.0769231	0.115385	0.108108	0.189655	0.0576923	0.130435	0.0357143	0.0909091	0.1	0.2	0.333333	0.12	1	0.0740741	0.0363636	0.647059	0.135135	0.25641	0.173913	0.166667	0.0512821	0.0967742	0.0689655	0.25	0.0888889	0.0606061	0.0833333
PRAD_M711	0.25	0.269231	0.4375	0.0384615	0.692308	0.0454545	0.04	0.0384615	0.101695	0.0625	0.04	0.0416667	0.103448	0.1	0.103448	0.384615	0.142857	0.647059	0.0416667	0.0357143	1	0.151515	0.153846	0.137931	0.1	0.0571429	0.047619	0.08	0.107143	0.0952381	0.0689655	0.1
CESC_M565	0.238806	0.280702	1	0.0576923	0.0181818	0.0307692	0.57377	0.0392157	0.196078	0.153153	0.0675676	0.1	0.0555556	0.140351	0.2	0.319149	0.11828	0.395833	0.263158	0.112069	0.0350877	0.189655	0.222222	0.152318	0.204082	0.0833333	0.037037	0.038961	0.217391	0.309091	0.0480769	0.109091
CESC_M71	0.3	0.216374	1	0.0666667	0.0131579	0.0409836	0.426829	0.0456853	0.224299	0.137405	0.0625	0.0914634	0.045045	0.202128	0.173913	0.281818	0.121495	0.435185	0.292035	0.162791	0.0340909	0.139241	0.242857	0.153846	0.19403	0.075	0.0333333	0.0394737	0.149254	0.223684	0.0574713	0.107843
ESCA_M503	0.219178	0.385965	0.57377	0.0657895	0	0.028169	1	0.0517241	0.208333	0.175439	0.0625	0.16129	0.0520833	0.183333	0.178571	0.285714	0.111111	0.386139	0.201835	0.097561	0.031746	0.293103	0.2	0.16129	0.19403	0.0923077	0.0327869	0.0361446	0.169811	0.322034	0.0483871	0.135593
[truncated: 504 more rows]
