# Supplementary material for: Multiscale network modeling reveals the gene regulatory landscape driving cancer prognosis in 32 cancer types
Source: Genome Res. 2023 Oct;33(10):1806–17. doi: 10.1101/gr.278063.123 (PMC10691533; doi:10.1101/gr.278063.123)
Supplement: Supplement 14 [file Supplemental_Table_S8.xlsx]

## Sheet: Supplemental_Table_S8
Supplemental Table S8. The Jaccard index of specific modules in each cancer
Module	BLCA	BRCA	CESC	CHOL	COAD	DLBC	ESCA	GBM	HNSC	KICH	KIRC	KIRP	LGG	LIHC	LUAD	LUSC	MESO	OV	PAAD	PCPG	PRAD	READ	SARC	SKCM	STAD	TGCT	THCA	THYM	UCEC	UCS	UVM	ACC
ACC_M1000	0.0245902	0.0192308	0.0322581	0.0263158	0.0192308	0.04	0.037037	0.032967	0.0377358	0.0232558	0.025974	0.0298507	0.025974	0.0240964	0.03125	0.0212766	0.0338983	0.028169	0.0350877	0.0363636	0.0196078	0.0185185	0.0416667	0.0227273	0.0175439	0	0.0224719	0	0.0222222	0.030303	0.0344828	1
ACC_M1017	0.0333333	0.030303	0.0215827	0.0188679	0.025641	0.0357143	0.0322581	0.0357143	0.0294118	0.0185185	0.0185185	0.03125	0.0240964	0.0178571	0.0357143	0	0.0188679	0.0289855	0.0377358	0.03125	0.0357143	0.0185185	0.0181818	0.047619	0	0.0163934	0	0.0363636	0.028169	0.021978	0.0379747	1
ACC_M1028	0.0227273	0.0217391	0.0227273	0.0294118	0.0338983	0.0298507	0.0217391	0.0222222	0.0212766	0	0.0204082	0.0294118	0.0227273	0.0294118	0.0227273	0.0204082	0.0222222	0.0363636	0.0227273	0.0243902	0.0217391	0.0227273	0.02	0.0392157	0.0222222	0.03125	0.0218978	0.0263158	0.0222222	0.0327869	0.0227273	1
ACC_M104	0.0215054	0.0285714	0.0208333	0.0212766	0.0291262	0.0186916	0.026178	0.0375	0.0234375	0.0204082	0.0212766	0.0210526	0.0263158	0.0337079	0.0222222	0.020202	0.0212766	0.03125	0.0330579	0.0217391	0.025	0.0265487	0.021978	0.0196078	0.027027	0	0.0173611	0	0.0222222	0.026087	0.032	1
ACC_M1053	0.0434783	0.0384615	0.0416667	0.0434783	0.0434783	0	0.0434783	0.0434783	0.0454545	0.0434783	0.04	0	0.0434783	0.0454545	0.04	0.0416667	0.0416667	0.0294118	0.0384615	0.0384615	0.0454545	0.0454545	0.0454545	0.0454545	0.0454545	0.0434783	0.0322581	0.0363636	0.0384615	0.0434783	0	1
ACC_M122	0.0350877	0.025641	0.0362319	0.0243902	0.0215633	0.0319149	0.0185185	0.038835	0.0428571	0.0194175	0.033557	0.0220588	0.0205479	0.0285714	0.0378788	0.0396825	0.0193548	0.0252525	0.0190476	0.0183486	0	0.0243902	0.026087	0.0382166	0.0176991	0.0183486	0.0189873	0.0194175	0.0291971	0.0227273	0	1
ACC_M1231	0.04	0	0.0416667	0.0416667	0	0.04	0.0434783	0.0357143	0.0344828	0.0238095	0.0384615	0.0348837	0.047619	0	0.0384615	0.047619	0.047619	0.0322581	0.0384615	0.047619	0	0	0.0434783	0.0454545	0	0	0	0.0357143	0.04	0.0344828	0	1
ACC_M1242	0.0443038	0.027027	0.0384615	0.0194805	0.0175439	0.0208333	0.0392157	0.0136054	0.0405405	0.0197368	0.0223464	0.03125	0.0186047	0.0242424	0.0497238	0.0273973	0.021978	0.0301205	0.0236686	0.0291971	0.0193548	0.0441989	0.0392157	0.0257732	0.0337838	0.0141844	0.013245	0.0191388	0.021164	0.034965	0.0202703	1
ACC_M1247	0.0238095	0.0232558	0.0212766	0.0298507	0.0217391	0.0227273	0.0227273	0	0.0344828	0	0.0227273	0.030303	0	0.0247934	0.0227273	0.037037	0.0232558	0.0434783	0.0232558	0.0238095	0.0298507	0.0238095	0.021978	0.0487805	0.0238095	0.0227273	0	0.031746	0.04	0.0227273	0.0363636	1
ACC_M1289	0.0392157	0.0384615	0.0377358	0.03125	0.0322581	0.037037	0.037037	0.0357143	0.0357143	0.0344828	0.03125	0	0.037037	0.0384615	0.037037	0.0285714	0.037037	0.0444444	0.03125	0.0357143	0.0333333	0.03125	0.0344828	0.0322581	0.037037	0.03125	0.0384615	0	0.0384615	0.037037	0.0357143	1
ACC_M13	0.0220994	0.0232558	0.020979	0.0262172	0.0199005	0.0382166	0.019685	0.026178	0.0306748	0.03125	0.0257511	0.0142857	0.0239521	0.033241	0.0255102	0.0359281	0.027972	0.0231214	0.028777	0.0260417	0.0315789	0.0234742	0.0240964	0.0208333	0	0	0.0232558	0.0206186	0.0192308	0.0232108	0.0220994	1
ACC_M1395	0.032967	0.0487805	0.0238095	0.0454545	0.0238095	0.0243902	0.0416667	0.0434783	0.030303	0.0487805	0.0384615	0.0408163	0.0487805	0.0416667	0.0487805	0.0344828	0.0465116	0.031746	0.0465116	0.0340909	0.0265487	0.0363636	0.0444444	0.030303	0.0344828	0.0465116	0.027027	0.034188	0.025641	0.047619	0.0392157	1
ACC_M15	0.0344828	0.027027	0.0245098	0.0233645	0.0375587	0.025	0.020979	0.0416667	0.0274725	0.0273224	0.020979	0.0213904	0.0251256	0.025	0.0271739	0.0246305	0.0334928	0.0322581	0.0217822	0.0291262	0.0245098	0.0284698	0.0360825	0.026178	0.0404858	0.026455	0.0263158	0.0262295	0.0276243	0.0364583	0.0107527	1
ACC_M157	0.0437376	0.0423077	0.0310345	0.0255682	0	0.0246914	0.0381356	0.0265781	0.0284698	0.0371622	0.0391061	0.0353982	0.0361446	0.0354331	0.0425926	0.0295203	0.0283401	0.0251046	0.0289017	0.0431655	0.0265781	0.0290698	0.0333333	0.0349127	0.0360656	0.019685	0.0321932	0.026087	0.0342679	0.0378788	0.0287162	1
ACC_M1703	0.0350877	0.0285714	0.0357143	0.0322581	0.0178571	0.030303	0.0384615	0.030303	0.037037	0.0377358	0.0357143	0.0441176	0.0333333	0.0336134	0.0291262	0.0246914	0.0307692	0.0298507	0.030303	0.04	0.0322581	0.0273973	0.025974	0.0181818	0.0325203	0.0277778	0.0288462	0.0254237	0.03125	0.0363636	0.0363636	1
ACC_M1738	0.026087	0.0222222	0.0363636	0.0289855	0.0222222	0.0416667	0.0425532	0.0357143	0.0434783	0	0.0285714	0.0333333	0.0285714	0.0263158	0.0350877	0.0229885	0.0384615	0.03125	0.04	0.0416667	0.0227273	0.0212766	0.0461538	0.0246914	0.0186916	0	0.0243902	0	0.0240964	0.0338983	0.0392157	1
ACC_M1749	0.0434783	0.04	0.04	0.0434783	0	0.0434783	0.0384615	0.04	0.030303	0.0333333	0.0357143	0.0384615	0.0434783	0.037037	0.0333333	0.0294118	0.04	0.0434783	0.0434783	0	0	0.0434783	0	0.037037	0.0416667	0.037037	0.0298507	0	0.0416667	0.0416667	0.0434783	1
ACC_M19	0.0204082	0.0485437	0.049505	0.0296296	0.0273973	0.0263158	0.0190476	0.0471698	0.0490196	0.0384615	0.0194805	0.0337838	0.0432099	0.0392157	0.0480769	0.0310881	0.0183486	0.0454545	0.045045	0.0337838	0.020979	0.0480769	0.049505	0.0265487	0.0314961	0.0458716	0.0247934	0.024	0.0277778	0.0438596	0.03125	1
ACC_M20	0.0247423	0.0232558	0.0236967	0.0202703	0.0225989	0.0213675	0.0186916	0.0196078	0.0141844	0.0254237	0.0283688	0.0205479	0.0232558	0.0265487	0.018797	0.0205479	0.0248447	0.0238095	0.024055	0.0245399	0.0285714	0.0368098	0.0228571	0.0248447	0.0392157	0.0192308	0.021164	0.0228571	0.0193548	0.0192926	0.0160428	1
ACC_M22	0.0247525	0.0320513	0.0227273	0.0134228	0.0245399	0.0136054	0.0359477	0.0251572	0.0266667	0.021164	0.0204604	0.0206897	0.030837	0.03	0.0243902	0.0227273	0.0414747	0.0222222	0.0331126	0.0348101	0.0210728	0.0366492	0.0271739	0.033557	0.0192308	0.0184049	0.0241546	0.0217391	0.0209424	0.0205479	0.0228571	1
ACC_M227	0.0326087	0.0428571	0.0253165	0.0224719	0.0240964	0.016129	0.0306122	0.043956	0.037037	0.031746	0.0394737	0.0277778	0.0263158	0.0298507	0.0277778	0.0327869	0.030303	0.0434783	0.031746	0.03125	0.030303	0.0141243	0.045977	0.0314961	0.0381679	0.0263158	0.0352113	0	0.0253165	0.015625	0.0327869	1
ACC_M228	0.0169492	0.0238095	0.0178571	0.0185185	0.0315789	0.030303	0.0188679	0.0253165	0.032967	0.0344828	0.0192308	0.0188679	0.025641	0.0285714	0.0263158	0.0377358	0.0273973	0.0229885	0.0483871	0.0188679	0.0188679	0.0192308	0.0338983	0.0266667	0.0277778	0.0142857	0	0.0377358	0.0327869	0.0277778	0.0294118	1
ACC_M23	0.0241935	0.0208333	0.015625	0.0152672	0.020979	0.016	0.025974	0.0251256	0.0215827	0.0152672	0.0206186	0.0212766	0.0240385	0.0277778	0.0198675	0.0223881	0.0193548	0.0230769	0.030303	0.0231481	0.0232558	0.0227273	0.0204082	0.0202703	0.0214724	0.0209205	0.0202703	0.0214286	0.018315	0.0229008	0.0236686	1
ACC_M232	0.0178571	0.0344828	0.03125	0.0410959	0.0283019	0.0238095	0.0266667	0.0357143	0.0235294	0	0.0363636	0.0322581	0.0181818	0.0166667	0.0185185	0.037037	0.0294118	0.0294118	0.0350877	0.0181818	0	0.0322581	0.03125	0.025974	0.0344828	0.0181818	0.0181818	0.0265487	0.0289855	0.0185185	0.0178571	1
ACC_M245	0.025	0.0277778	0.0263158	0.0232558	0.0277778	0.0285714	0.025641	0.0285714	0.025	0.0434783	0.027027	0.0217391	0.0263158	0.037037	0.0285714	0.0434783	0.027027	0.0285714	0.0232558	0.0434783	0.0285714	0.037037	0.0384615	0.0277778	0.027027	0	0.0327869	0.0263158	0.0285714	0.0285714	0.0285714	1
ACC_M25	0.0273224	0.0228571	0.0227273	0.023622	0	0.0181818	0.0222222	0.0198675	0.018018	0.0335196	0.0258621	0.0214286	0.0241935	0.0254237	0.0296296	0.0243902	0.0301205	0.0178571	0.0252101	0.0294118	0.027027	0.017094	0.034188	0.018018	0.0173913	0.0215827	0	0.0263158	0.0241935	0.0172414	0.0257732	1
ACC_M253	0.0273973	0.0177778	0.027027	0.0273973	0.0188679	0.025974	0.0212766	0.0136986	0	0.025974	0.0253165	0.0133333	0.021978	0.0253165	0	0.025	0.0232558	0.0263158	0.025641	0.028169	0.0243902	0.0138889	0.0240964	0.0365854	0.0277778	0.0229885	0.0240964	0.0196078	0.0136986	0.025974	0.03125	1
ACC_M262	0.0289855	0.0447761	0.0461538	0.025	0.0246914	0.0394737	0.0263158	0.0428571	0.0454545	0.0294118	0.025974	0.0454545	0.0361446	0.0330579	0.0441176	0.0230769	0.028169	0.0416667	0.04	0.045977	0.0298507	0.0441176	0.0461538	0.04	0.028169	0.0410959	0.0285714	0.0344828	0.028169	0.0384615	0.032967	1
ACC_M264	0.025	0.0239521	0.0220588	0.020979	0.0232558	0.0218341	0.0189873	0.0202703	0.0170732	0.025974	0.0294118	0.0212766	0.0239521	0.0271493	0.0191571	0.0212766	0.025641	0.0245399	0.0226244	0.0253165	0.0296296	0.0379747	0.0235294	0.025641	0.040201	0.0197044	0.0217391	0.0235294	0.02	0.0196078	0.0164835	1
ACC_M27	0.0267857	0.0228758	0.0394737	0.0238095	0.0438596	0	0.025641	0.0254237	0.0236686	0.0240964	0.0363636	0.0218978	0.0243902	0.043956	0.0413793	0.0273973	0.0217391	0.025641	0.0344828	0.0291262	0.0227273	0.0285714	0.0263158	0.0190476	0	0.0258621	0.0232558	0.0243902	0.0394737	0.0240964	0.0307692	1
ACC_M275	0.0277778	0.0217391	0.0248447	0.0224719	0.0233918	0.0229885	0.0240385	0.0196078	0.0219298	0.0248447	0.020202	0.0232558	0.0283019	0.0216216	0.0230769	0.0291262	0.0375	0.0220588	0.0434783	0.0421053	0.0229885	0.037594	0.03125	0.0263158	0.0215054	0.0204082	0.0248963	0.0208333	0.0217391	0.0348837	0.0185185	1
ACC_M278	0.0447761	0.0142857	0.028169	0.0212766	0.0348837	0.0294118	0.030303	0.0314961	0.0365854	0.027027	0.030303	0.0357143	0.0243902	0.0222222	0.0272727	0.038961	0.0294118	0.0410959	0.0394737	0.0273973	0.0144928	0.025974	0.0333333	0.0211268	0.0277778	0	0.0144928	0.0253165	0.027027	0.0405405	0.0325203	1
ACC_M286	0.0218341	0.0243902	0.0243902	0.0246914	0	0.0232558	0.026087	0.0208333	0.0246914	0.0217391	0.0309278	0.0272727	0.0319149	0.0340909	0	0.0224719	0.0367647	0.0243902	0.0243902	0.0322581	0.025641	0.0224719	0.045977	0.0246914	0.0235294	0.0275229	0	0.0322581	0.0246914	0.0198675	0.03125	1
ACC_M30	0.0487805	0.034188	0.0352941	0.02	0.0392157	0.0196078	0.0246914	0.0322581	0.0333333	0.0338983	0.0322581	0.03125	0.037037	0.0392157	0.0192308	0.0350877	0.0344828	0.0483871	0.0238095	0.0392157	0.0350877	0.0192308	0.0408163	0.0363636	0.0243902	0.0204082	0.0428571	0.0344828	0.0196078	0.0461538	0	1
ACC_M324	0.0273973	0.030303	0.0212766	0.0277778	0.025974	0.0263158	0.015625	0.0327869	0.0153846	0	0.027027	0.03125	0.016129	0.0232558	0.0263158	0.03125	0.015873	0.0273973	0.016129	0.0212766	0.030303	0.016129	0.0147059	0.0298507	0.025641	0.0243902	0.0153846	0	0.015873	0.0253165	0.016129	1
ACC_M334	0.0229885	0.0363636	0.0322581	0.027027	0.0208333	0.0185185	0.0185185	0.028169	0	0.0181818	0.0363636	0.0285714	0.0185185	0.037037	0.0322581	0.0338983	0.025974	0.0175439	0.0277778	0.0405405	0.0172414	0.0277778	0.0428571	0.0178571	0.0181818	0	0.0338983	0.0181818	0.0338983	0.03125	0.0196078	1
ACC_M341	0.0416667	0.0322581	0.0434783	0.037037	0.0384615	0.0434783	0.037037	0.0416667	0.0416667	0.0384615	0.0434783	0.04	0.0333333	0.0384615	0.037037	0.0416667	0.037037	0.0434783	0	0.0434783	0.037037	0.04	0.0416667	0.0434783	0.0357143	0.03125	0.0357143	0.04	0.0384615	0.0384615	0.0344828	1
ACC_M36	0.0289855	0.0277778	0.0434783	0.0185185	0.0185185	0.0166667	0.0263158	0.0322581	0.025641	0.0178571	0.0263158	0.0206186	0.0215054	0.0322581	0.0188679	0.0277778	0.0344828	0.0185185	0.025641	0.0363636	0.0263158	0.0169492	0.031746	0.0188679	0	0.03125	0.030303	0.0277778	0.027027	0.0222222	0.0178571	1
ACC_M361	0.0377358	0.0363636	0.030303	0.0322581	0.0338983	0.0178571	0.0307692	0.0322581	0.0192308	0.0243902	0.0192308	0.0192308	0.0344828	0.0377358	0.0172414	0.0377358	0.037037	0.0235294	0.030303	0.0363636	0.0258621	0.0185185	0.0212766	0.0192308	0.0392157	0.0277778	0.0454545	0.037037	0.0192308	0.0405405	0.0188679	1
ACC_M39	0.0277778	0.027027	0.0263158	0.0277778	0.0333333	0.031746	0.0434783	0.027027	0.0408163	0.0277778	0.0277778	0.0243902	0.0263158	0.0263158	0	0.025641	0.027027	0.0483871	0.0238095	0.0277778	0.025641	0.027027	0.027027	0.0392157	0.027027	0.027027	0.03125	0.0307692	0.027027	0.025641	0.0227273	1
ACC_M43	0	0.0227273	0	0.0266667	0.0192308	0.0186047	0.03125	0	0.0285714	0.0307692	0.0294118	0.0163934	0.0227273	0.027027	0.031746	0.03125	0.016129	0.0285714	0.0208333	0.0327869	0.016129	0.0298507	0.025641	0.0410959	0.030303	0	0.0163934	0.0222222	0.0326087	0.016129	0.0266667	1
ACC_M468	0.0350877	0.0298507	0.0454545	0.0192308	0	0.0273973	0.0416667	0.03125	0.0384615	0.0196078	0.0188679	0.025974	0.0196078	0.0357143	0.04	0.0289855	0	0.0454545	0.0294118	0.0192308	0.0392157	0.0196078	0.0338983	0.0204082	0	0.0350877	0	0.037037	0.0188679	0.0344828	0.030303	1
ACC_M47	0.0235294	0.038961	0.0266667	0.0238095	0.0224719	0.0227273	0.0131579	0.0273973	0.0131579	0.0235294	0.0232558	0.0263158	0.0135135	0.0233645	0.0227273	0.0277778	0.0217391	0.0266667	0	0.021978	0.025641	0.0135135	0.0194175	0.0273973	0.0232558	0.0230769	0.0253165	0	0.0133333	0.021978	0.0263158	1
ACC_M48	0.0266667	0.0238095	0.0238095	0.0240964	0.0159091	0.0208333	0.0266667	0.030303	0.0206897	0	0.0283019	0.0181818	0.0227273	0.0266667	0.0322581	0.0344828	0.0384615	0.0322581	0.0194805	0.03125	0.0246914	0.029703	0.0416667	0.0384615	0.025641	0.0319149	0.0319149	0.0309278	0.0263158	0.0263158	0.0229885	1
ACC_M54	0.027027	0.027027	0.0263158	0.0434783	0.0263158	0.027027	0.0227273	0.025	0.027027	0.0377358	0.0263158	0.0483871	0.0408163	0.0277778	0.0350877	0.027027	0.025641	0.027027	0.025641	0.0289855	0.0350877	0.027027	0.0344828	0.025641	0.027027	0.027027	0.030303	0.025	0.0263158	0.0263158	0	1
ACC_M545	0.037037	0.0285714	0.037037	0.037037	0	0.047619	0.0333333	0.037037	0.030303	0.0243902	0.037037	0.037037	0.0344828	0.0384615	0.0322581	0.0333333	0.0384615	0.0333333	0.0322581	0.037037	0.0344828	0.0384615	0	0.0344828	0.0434783	0.0357143	0.037037	0.01875	0	0.037037	0	1
ACC_M55	0.03125	0.0240964	0.0327869	0.0454545	0.0444444	0.0212766	0.0232558	0.047619	0.0416667	0.0238095	0.0266667	0.0384615	0.0232558	0.0306122	0.0384615	0.0408163	0.0416667	0.0384615	0.0333333	0.0465116	0.0350877	0.0285714	0.0454545	0.04	0.0227273	0.0410959	0.0277778	0.0208333	0.0454545	0.037037	0.0263158	1
ACC_M568	0.0266667	0.0273973	0.0253165	0.0326087	0.0285714	0.0428571	0.0186916	0.0298507	0.027027	0.025	0.0361446	0.0342466	0.0217391	0.0218978	0.0289855	0.0273973	0.0298507	0.0357143	0.0266667	0.031746	0.0201342	0.0227273	0.0461538	0.0483871	0	0.0253165	0.025	0.0280374	0	0.03125	0.0153846	1
ACC_M574	0.0384615	0.0232558	0.0333333	0.0216606	0.0153846	0.0178571	0.0338983	0.0116959	0.0348837	0.0170455	0.0197044	0.0282258	0.0152284	0.021164	0.0439024	0.0351438	0.0203046	0.0263158	0.0207254	0.025	0.0167598	0.0390244	0.0338983	0.0229358	0.0290698	0.0159574	0.0172414	0.0164835	0.0196078	0.0299401	0.0174419	1
ACC_M608	0.037037	0.037037	0.037037	0.0357143	0.0454545	0.037037	0.0357143	0.0454545	0.0357143	0.037037	0.0434783	0.0357143	0.037037	0.0285714	0.0344828	0.037037	0.037037	0.0277778	0.037037	0.037037	0.037037	0.037037	0.0465116	0.0344828	0.037037	0.0333333	0	0.0319149	0.0344828	0.0344828	0.0322581	1
ACC_M612	0.0416667	0	0.0416667	0.0454545	0.0357143	0.0357143	0.0384615	0.0416667	0.0416667	0.030303	0.0384615	0.0357143	0.04	0	0.0384615	0.0434783	0.0384615	0.04	0	0.0384615	0.0384615	0.0465116	0	0.04	0.037037	0	0	0.04	0.0333333	0.037037	0.0384615	1
ACC_M613	0.0294118	0.0232558	0.0285714	0.0222222	0	0.0227273	0.0227273	0.0273973	0.0222222	0.0333333	0.029703	0.0377358	0.0315789	0.0232558	0.0227273	0.0232558	0.0344828	0.0322581	0.0416667	0.0425532	0.0298507	0.0222222	0.0307692	0.0217391	0.0227273	0.0222222	0.025641	0	0.0232558	0.0227273	0.0227273	1
ACC_M63	0.0291262	0.047619	0.0196078	0.0229885	0.0224719	0.0194175	0.0183486	0.0186916	0.0352941	0.0224719	0.0206186	0.029703	0.0319149	0.0224719	0.0413223	0.0227273	0.0222222	0.03	0.0206186	0.0232558	0.0204082	0.025	0.0337079	0.0224719	0.0222222	0.0258065	0.0227273	0.0222222	0.0254237	0.0185185	0.0215054	1
ACC_M654	0.0408163	0.0212766	0	0.0232558	0.0238095	0.0232558	0.037037	0	0.025	0.047619	0.0337079	0.0327869	0.0232558	0.0333333	0.0350877	0.0434783	0.0444444	0.0434783	0.03125	0.0444444	0.0377358	0.025641	0.0348837	0.025974	0.0227273	0.0253165	0.0416667	0.0428571	0.0232558	0.0309278	0.0487805	1
ACC_M782	0.0454545	0.04	0.0454545	0.0454545	0.0416667	0	0.0434783	0.0416667	0.0357143	0.04	0.0384615	0.047619	0	0.0454545	0.0454545	0.047619	0.0434783	0.047619	0.047619	0.04	0.0454545	0.0434783	0.0416667	0.0384615	0.0384615	0.04	0.00864553	0.047619	0.047619	0.0454545	0.0344828	1
ACC_M840	0.0277778	0.0357143	0.0454545	0.0454545	0	0.0434783	0.0416667	0.0384615	0.0208333	0.04	0.04	0.0454545	0.0416667	0.04	0.0444444	0.0434783	0.0434783	0.0434783	0.0454545	0.03125	0.0454545	0.0434783	0.037037	0.0338983	0.0434783	0.04	0.0357143	0	0.04	0.0434783	0.0344828	1
ACC_M844	0.025974	0.0344828	0.0337838	0.0133333	0.0262009	0.0206186	0.033557	0.0172414	0.0280374	0.0261438	0.0271903	0.0212766	0.0350877	0.0246305	0.0318182	0.0253968	0.0298507	0.0291262	0.0285714	0.0242718	0.0200501	0.0379747	0.031746	0.0276074	0.027027	0.0264901	0.0230263	0.0235294	0.0230769	0.0290456	0	1
ACC_M955	0.0434783	0.0384615	0.04	0.037037	0	0.0434783	0.0416667	0.0416667	0.0416667	0.037037	0.0416667	0.0425532	0.037037	0.04	0.0357143	0.0434783	0.04	0	0.0384615	0.0416667	0.0416667	0	0	0	0.0434783	0	0	0.0344828	0.0434783	0.0384615	0.04	1
ACC_M992	0.0454545	0.0232558	0.0365854	0.04	0.025974	0.0222222	0.0333333	0.0227273	0.03125	0.02	0.0222222	0.0227273	0.0444444	0.04	0	0.0232558	0.0350877	0.0425532	0.0377358	0.0232558	0	0.0222222	0.037037	0.0222222	0.0408163	0.0344828	0.0232558	0.0217391	0.0232558	0.0227273	0.0232558	1
ACC_M996	0.0229008	0.0283688	0.0220994	0.0169492	0.0243902	0.0246305	0.0212766	0.0245902	0.0181818	0.0280899	0.0283688	0.026087	0.0283688	0.025641	0.0212766	0.0204082	0.0307692	0.0227273	0.025641	0	0.0272727	0.037594	0.0253165	0.0229008	0.0342857	0.0206186	0.0194805	0.0230769	0.0241935	0.020202	0.0192308	1
BLCA_M1016	1	0.025641	0.0180995	0.0108696	0.0270728	0.0108108	0.0246305	0.0143541	0.046875	0.0171674	0.025	0.0210084	0.0184211	0.0218069	0.0236967	0.0313901	0.0160428	0.0182482	0.0260586	0.0108108	0.0224033	0.0181818	0.0160428	0.0186916	0.019685	0.0204082	0.0198864	0.0108696	0.0214592	0.0194444	0.0221239	0.0163934
BLCA_M1030	1	0.0230769	0.0350877	0.0243902	0.0157791	0.0218978	0.0326087	0.0258621	0.0411765	0.0330579	0.0212766	0.0217391	0.0283019	0.0165289	0.0212766	0.0373832	0.020202	0.0285714	0.026087	0.0238095	0.0421053	0.0185185	0	0.0323625	0.0268456	0.0191083	0	0.0252101	0.021978	0.0216216	0.0186916	0.0241935
BLCA_M1108	1	0.0416667	0.0454545	0.0322581	0.0384615	0.0416667	0.0416667	0.0333333	0.037037	0.0434783	0.0434783	0.0344828	0.0107527	0.037037	0.0454545	0.0434783	0.0434783	0.0384615	0.027027	0.0454545	0.037037	0.0434783	0.0454545	0.0454545	0.0416667	0.0322581	0.0285714	0.0454545	0.030303	0.0434783	0.037037	0.0294118
BLCA_M319	1	0.024	0.0387097	0.0186916	0.028169	0.021978	0.0338983	0.0272109	0.0413793	0.0188679	0.0403226	0.01875	0.027027	0.0229008	0.0253623	0.0380952	0.0243902	0.0377358	0.027027	0.0273973	0.0283019	0.0230769	0.0254237	0.0253165	0.026087	0.025641	0.0185185	0.0178571	0.025641	0.0344828	0.0176991	0.0172414
BLCA_M406	1	0.0240481	0.015873	0.0131579	0.0273752	0.00925926	0.0275862	0.012766	0.0418118	0.0190114	0.0236887	0.0262172	0.0166667	0.0235849	0.0211864	0.0275591	0.0193906	0.0206186	0.0267062	0.0127119	0.0230326	0.0189655	0.0186567	0.0221239	0.0175439	0.019697	0.0167364	0.0190114	0.0189394	0.0189125	0.0194553	0.0140187
BLCA_M413	1	0.040404	0.0234375	0.0230769	0.0272109	0.0263158	0.0359712	0.0263158	0.0258621	0.02	0.0199005	0.025974	0.0206897	0.025	0.0413223	0.0485437	0.0290698	0.0363636	0.041958	0.0285714	0.0214286	0.0247934	0.0254237	0.0288462	0.0164474	0.025	0.0258621	0.0357143	0.0192308	0.0222222	0.024	0.0275229
BLCA_M417	1	0.0277778	0.03125	0.0214286	0.0176991	0.0235294	0.033557	0.025	0.0327869	0.0188679	0.0169014	0.0247934	0.017094	0.018018	0.0267857	0.0299145	0.0357143	0.0265487	0.0469799	0.0268817	0.0263158	0.0206897	0.0184049	0.0206897	0.0291971	0.0179533	0.023622	0.0220386	0.0373134	0.0178571	0.0194175	0.0322581
BLCA_M433	1	0.0198675	0.0218978	0.0353535	0.0169492	0.0172414	0.0227273	0.031746	0.0334448	0.034965	0.0232558	0.025	0.0242215	0.0208333	0.0322581	0.0252101	0.0194175	0.0225564	0.0300429	0.0227273	0.0206612	0.0310078	0.0235294	0.0223214	0.0177778	0.0314136	0.0247934	0.023166	0.0188679	0.0281426	0	0.0229008
BLCA_M447	1	0.0235294	0.0416667	0.0289855	0.016129	0.0294118	0.0273973	0.0206186	0.0454545	0.0322581	0.0246914	0.027027	0.03125	0.03125	0.0298507	0.0298507	0.027027	0.0327869	0.025974	0.0301205	0.0327869	0.0307692	0.0289855	0.0163934	0.0235294	0.0266667	0.0243902	0.0232558	0.03125	0.025641	0.0322581	0.0273973
BLCA_M70	1	0.0377358	0.0375	0.0208333	0.028	0.0393443	0.0386905	0.0263158	0.0384615	0.0189873	0.0308642	0.0172414	0.025	0.0233236	0.0276243	0.044	0.0278638	0.0277778	0.027027	0.0217391	0.027972	0.0275229	0.0228311	0.0204082	0.0196078	0.0193548	0.0229885	0.0229885	0.03125	0.025974	0.013245	0.0191083
BLCA_M71	1	0.0255319	0.0413223	0.0304878	0.0210526	0.0326087	0.0307692	0.0306122	0.0288462	0.0229885	0.0235294	0.0333333	0.0191083	0.0264901	0.0283019	0.04	0.0210084	0.0322581	0.0379747	0.03	0.038835	0.0340909	0.0361446	0.021978	0.0232558	0	0.0212766	0.0240385	0.0234742	0.0337079	0.0117647	0.0283019
BLCA_M964	1	0.027027	0.0384615	0.0215054	0.0199005	0.0215054	0.0384615	0.0266667	0.0458015	0.0217391	0.0454545	0.0208333	0.0288462	0.025641	0.0267176	0.043956	0.024	0.0434783	0.0292398	0.030303	0.0326087	0.0258621	0.0288462	0.0254237	0.0444444	0.0291262	0.0212766	0.0204082	0.028169	0.0392157	0.020202	0.0196078
BRCA_M1026	0.0353982	1	0.0311419	0.0181818	0.0306748	0.0141844	0.0266667	0.0332226	0.0263789	0.0322581	0.0323102	0.03125	0.020316	0.0309859	0.0393701	0.0329341	0.0237467	0.0222222	0.0328947	0.0179211	0.0273556	0.0191571	0.0213333	0.0236559	0.0152091	0.0231548	0.02407	0.0228833	0.0216383	0.0287611	0.0210728	0.0161943
BRCA_M1487	0.0302198	1	0.0248447	0.0192771	0.034632	0.0123457	0.0344828	0.0214067	0.034202	0.027439	0.0254873	0.02849	0.0192771	0.0346205	0.0327869	0.0392857	0.0188235	0.0196629	0.0251572	0.0238095	0.0334347	0.0102389	0.0307692	0.037448	0.0182841	0.0282486	0.00680272	0.0326241	0.0180723	0.0255403	0.0345286	0.0174927
BRCA_M366	0.0174419	1	0.0236686	0.0184049	0.0239521	0.0226537	0.0184502	0.019084	0.020202	0.0122699	0.026455	0.0253623	0.0193705	0.03125	0.0163934	0.0238095	0.0194175	0.025641	0.022508	0.017316	0.0204918	0.0153846	0.0204778	0.0216216	0.0237154	0.016129	0.0217391	0.0247934	0.0181269	0.0241935	0.0187166	0.0204918
BRCA_M374	0.0196078	1	0.0167785	0.0228216	0.024055	0.011194	0.0277778	0.0159236	0.0250447	0.0176211	0.0204778	0.0223048	0.0212389	0.0299625	0.0246734	0.0226843	0.0216606	0.0226415	0.0246154	0.0136054	0.0301508	0.0250784	0.02331	0.0260116	0.0137457	0.0244957	0.0249267	0.011236	0.0326087	0.0117188	0.0243902	0.0228758
BRCA_M382	0.0384615	1	0.0357143	0.030303	0.027027	0.0384615	0.037037	0.0357143	0.0344828	0.0408163	0.0384615	0.0384615	0.0357143	0.0384615	0.0357143	0.037037	0.0294118	0.0322581	0.030303	0.0294118	0.0357143	0.0344828	0.0357143	0	0.0344828	0.0487805	0.0384615	0.0384615	0.0285714	0.0333333	0.0384615	0.030303
BRCA_M422	0.0286976	1	0.0222222	0.0199115	0.0342466	0.0110497	0.0357143	0.0191781	0.0322086	0.0259366	0.0273632	0.0257069	0.01766	0.0355781	0.0323276	0.0367893	0.0176768	0.0232143	0.025	0.0216346	0.0330935	0.00906344	0.0304878	0.0372549	0.0187166	0.0255102	0.0169082	0.032345	0.0183673	0.0275229	0.0341772	0.015748
BRCA_M430	0.0339943	1	0.0331126	0.017341	0.0315789	0.0135135	0.0283505	0.031746	0.0327103	0.0333988	0.0332278	0.0303644	0.0196937	0.0346741	0.0406091	0.0345821	0.0229008	0.021611	0.0314465	0.0183908	0.0262391	0.0181818	0.0205656	0.0229645	0.0144404	0.022695	0.0233546	0.0241379	0.02118	0.027897	0.0204638	0.0153257
BRCA_M444	0.0251256	1	0.0279188	0.0148368	0.0232108	0.0216867	0.0252324	0.0227273	0.0475162	0.0269461	0.0372578	0.0241187	0.0281955	0.0267296	0.0365591	0.0332779	0.0300546	0.0301318	0.0286123	0.0406852	0.0292758	0.0268817	0.0415879	0.025641	0.0264993	0.0236364	0.0273973	0.0259067	0.02457	0.0313199	0.0353403	0.0209524
BRCA_M445	0.0294118	1	0.0298507	0.0307692	0.0179641	0	0.0392157	0.0384615	0.025	0.0350877	0.03125	0.0315789	0.0394737	0	0.0327869	0.025	0.0491803	0.0325203	0.0470588	0.0342466	0.0253165	0.0333333	0.0461538	0.0319149	0.04	0.0164474	0.0392157	0.0240964	0.021978	0.037037	0.0243902	0.030303
BRCA_M447	0.0263158	1	0.025641	0.0352941	0.0326797	0.0229885	0.0277778	0.0232558	0.025	0.0185185	0.0449438	0.031746	0.029703	0.0294118	0.0306122	0.0337079	0.0408163	0.049505	0.025974	0.0253165	0.0222222	0.037037	0.0227273	0.0357143	0.0185185	0.0243902	0.0333333	0.0314961	0.0283401	0.0330579	0.0284698	0.0365854
BRCA_M61	0.0147783	1	0.0219178	0.0259067	0.020202	0.0235988	0.0194175	0.0218341	0.0228311	0.0103093	0.0273973	0.0261438	0.020316	0.0314286	0.0275229	0.0201005	0.020202	0.0262582	0.0214724	0.0217391	0.0212766	0.0104167	0.0216718	0.031746	0.0211268	0.0188172	0.0248756	0.021978	0.0196078	0.0215054	0.0174927	0.025641
BRCA_M63	0.0220713	1	0.0201794	0.0270701	0.0260223	0.015534	0.0280702	0.0228659	0.0298295	0.0199336	0.0231579	0.0263158	0.0167224	0.04	0.028777	0.0343284	0.0283554	0.0275735	0.0377358	0.0245614	0.0323015	0.0198675	0.0264386	0.0361882	0.0113122	0.0360144	0.0285036	0.0221811	0.0381194	0.027027	0.0289017	0.0225443
BRCA_M77	0.0291829	1	0.0189125	0.0214425	0.0367554	0.0201207	0.0354505	0.0187354	0.0366197	0.0264901	0.0301837	0.0251852	0.0240674	0.0378251	0.028463	0.0364188	0.0272572	0.0291262	0.0239044	0.0211946	0.0317041	0.01	0.0337662	0.0455665	0.0185185	0.0264741	0.0231144	0.0323786	0.0181159	0.031457	0.042654	0.014218
BRCA_M80	0.0322581	1	0.0336788	0.0176991	0.0351124	0.0144509	0.0299003	0.0273224	0.0422833	0.0340502	0.0337739	0.0313076	0.0237624	0.0418301	0.0382883	0.0353535	0.0225734	0.0251346	0.0326975	0.0174927	0.029316	0.0153374	0.0256881	0.0226843	0.015015	0.0265957	0.0289575	0.0281124	0.0268741	0.0271318	0.0222222	0.0174927
BRCA_M93	0.0311284	1	0.0271493	0.0221774	0.026643	0.0215983	0.0249688	0.0243478	0.0470588	0.027972	0.0376045	0.0273504	0.029361	0.0269608	0.0371094	0.0371517	0.026506	0.0365217	0.0323383	0.0469667	0.0331412	0.0298013	0.0434783	0.024948	0.0273312	0.030303	0.0282413	0.0305011	0.0232198	0.030303	0.039604	0.0191638
BRCA_M94	0.0194805	1	0.0260304	0.0230548	0.0243902	0.0204778	0.0230415	0.0321593	0.0257143	0.0287908	0.0375671	0.0208333	0.0280899	0.0265152	0.0257069	0.0335196	0.0264423	0.0189274	0.023511	0.0329114	0.0308219	0.0258621	0.0256	0.0216718	0.0169492	0.0216802	0.0269461	0.017301	0.042394	0.0284698	0.025	0.0215827
BRCA_M96	0.0444444	1	0.0299401	0.0304878	0.0478088	0.03367	0.0289855	0.019802	0.0427807	0.0245399	0.0284553	0.038674	0.0273973	0.0306122	0.0414201	0.0319149	0.0195122	0.0301508	0.031339	0.0412574	0.0414747	0.0315789	0.038961	0.0253968	0.0292398	0.0340909	0.0300429	0.0260417	0.0292398	0.0213675	0.0185185	0.0233918
BRCA_M967	0.019305	1	0.0200803	0.0206897	0.0246914	0.0097561	0.0287356	0.0181818	0.0254403	0.0172414	0.0197368	0.0193798	0.0189702	0.0266393	0.0233645	0.0238908	0.0238806	0.0277778	0.0232172	0.0148515	0.0253623	0.0236887	0.0263158	0.0239521	0.0165289	0.0200308	0.023622	0.0137615	0.0301003	0.0175439	0.0213523	0.0211765
CESC_M1061	0.0364964	0.0390879	1	0.0267857	0.0364583	0.0295203	0.0474138	0.0316456	0.0410959	0.0307692	0.0241935	0.0305344	0.0230415	0.0347222	0.0337553	0.0458716	0.0309278	0.0377358	0.028777	0.0243902	0.04375	0.0412371	0.0254777	0.0212766	0.0478469	0.031746	0.0292683	0.0349345	0.0331492	0.024	0.022409	0.0205479
CESC_M1580	0.0344828	0.0337079	1	0.0340909	0.0316456	0.03125	0.0360825	0.0131579	0.036036	0.0337838	0.025974	0.0481928	0.0253165	0.027027	0.0384615	0.0462633	0.0264901	0.043956	0.0310078	0.0322581	0.0438596	0.0408163	0.0272727	0.0253165	0.0491803	0.027972	0.0248447	0.0483871	0.0336134	0.025641	0.0183486	0.025641
CESC_M191	0.0373832	0.0271318	1	0.0174927	0.0233645	0.0118577	0.0428571	0.0197368	0.0443213	0.0231788	0.0171233	0.025641	0.0245283	0.0230263	0.0332226	0.0480769	0.0207852	0.0194553	0.0288184	0.0217391	0.024024	0.0168776	0.0225443	0.021327	0.0232019	0.0257235	0.0220588	0.0196078	0.0170648	0.02457	0.0116279	0.020202
CESC_M321	0.037464	0.0455531	1	0.0228571	0.0395257	0.035533	0.0443213	0.0275591	0.0472441	0.031348	0.0275591	0.0193798	0.0232558	0.0259259	0.0289157	0.0421286	0.0221519	0.0336134	0.0288714	0.0260586	0.04	0.0461165	0.0400802	0.015873	0.0389222	0.0238806	0.0377358	0.028169	0.039801	0.0212121	0.0236439	0.0195122
CESC_M843	0.0384615	0.0344828	1	0.0392157	0.0192308	0.0266667	0.046875	0.0235294	0.037037	0.0327869	0.0322581	0.0363636	0.028169	0.0338983	0.0377358	0.0472973	0.0338983	0.042735	0.037037	0.0327869	0.037037	0.0377358	0.0289855	0.0277778	0.0350877	0.0229885	0.0384615	0.037037	0.0379747	0.037037	0.0285714	0.0188679
CESC_M951	0.0253165	0.0215054	1	0.0151515	0	0.0454545	0.0357143	0.030303	0.0348837	0.0151515	0.0384615	0.0298507	0.027027	0.0289855	0.0447761	0.0318471	0.037037	0.027027	0.0348837	0.0275229	0.0235294	0.0151515	0.025641	0.025974	0.0289855	0.0289855	0.0347826	0.0447761	0.021978	0.0285714	0.0285714	0.025
CHOL_M1041	0.047619	0.0344828	0.0434783	1	0.0454545	0.03125	0.0434783	0	0	0.0454545	0.0454545	0.0384615	0.0377358	0.04	0.0454545	0.0434783	0.04	0.0416667	0.0454545	0	0	0.047619	0.037037	0.0434783	0	0.030303	0	0.0416667	0.018018	0.04	0	0.047619
CHOL_M1193	0.0454545	0.0434783	0.0434783	1	0	0.0416667	0.0333333	0	0.0454545	0.047619	0.0454545	0.04	0.0454545	0.0344828	0.0434783	0.025641	0.047619	0.0454545	0.0434783	0.0384615	0	0.0434783	0.0434783	0.030303	0.0454545	0	0	0.047619	0	0.047619	0.037037	0.04
CHOL_M12	0.039604	0.0351759	0.0380952	1	0.0294118	0.0412371	0.0421053	0.0225564	0.039604	0.0412371	0.04	0.032	0.0309278	0.040404	0.0347826	0.0392157	0.029703	0.037037	0.040404	0.034965	0.0380952	0.0373832	0.0344828	0.0412371	0.038835	0.0296296	0.0408163	0.0421053	0.0357143	0.0217391	0.02	0.0416667
CHOL_M1234	0.04	0.0454545	0.0425532	1	0.0363636	0.0227273	0.0212766	0.0227273	0.0333333	0.0217391	0.0227273	0.0434783	0.04	0.0377358	0.0333333	0.0377358	0.0465116	0.030303	0.0222222	0.0232558	0.027027	0.0384615	0.0434783	0.0454545	0.0465116	0.0212766	0.0212766	0.0222222	0.0434783	0.030303	0.0454545	0.0222222
CHOL_M130	0.0315457	0.0199203	0.0222222	1	0.0159363	0.00862069	0.0217984	0.012766	0.0162866	0.011811	0.0183824	0.021322	0.00858369	0.0376812	0.018797	0.0246085	0.0303738	0.0334572	0.0327103	0.0186335	0.0173611	0.012931	0.0142857	0.00862069	0.0123967	0.0116279	0.015625	0.0125523	0.0230179	0.012605	0	0.00858369
CHOL_M1312	0.0333333	0.04	0.0416667	1	0	0	0.0454545	0.0434783	0.0416667	0.0454545	0.0416667	0	0.0454545	0.0357143	0.0454545	0.0384615	0.0434783	0.0322581	0.0454545	0.0454545	0.0384615	0.0434783	0.0416667	0	0.0416667	0.0384615	0.0434783	0.0434783	0.0454545	0.0434783	0.03125	0.0454545
CHOL_M1389	0.0444444	0.0222222	0.0357143	1	0	0.021978	0.0444444	0.0227273	0.0392157	0.0217391	0.0277778	0.0227273	0.021978	0.024	0.0285714	0.0222222	0.0338983	0.0227273	0.0379747	0.031746	0.0217391	0.0408163	0.0425532	0.0222222	0.0434783	0.0222222	0.0217391	0.0222222	0.0425532	0.0227273	0.0217391	0.028169
CHOL_M1449	0.0238095	0.0294118	0.0257732	1	0.0309278	0.0283019	0.0229885	0.0238095	0.0380952	0.0227273	0.0357143	0.0365854	0.0288462	0.0333333	0.0268456	0.032967	0.0314961	0.0267857	0.046729	0.0234375	0	0.0340909	0.040404	0.0309278	0.0232558	0.0232558	0.0229885	0.026087	0.03125	0.0222222	0	0.03125
CHOL_M1483	0.0307692	0.021978	0.0181818	1	0.0340909	0.025641	0.0307692	0.0178571	0.0240964	0.0327869	0.030303	0	0	0.0350877	0.0384615	0.0246914	0.0333333	0.0266667	0.0422535	0.0185185	0	0.0185185	0	0.028169	0	0.0333333	0.03	0.0294118	0.0441176	0.0188679	0.0333333	0.0178571
CHOL_M1535	0.0322581	0.0333333	0.0333333	1	0.0434783	0.0344828	0.0344828	0.0294118	0.027027	0.0333333	0.0350877	0.0344828	0.0322581	0.0344828	0.0344828	0.037037	0.0344828	0.047619	0.0307692	0.0333333	0.0333333	0.0344828	0.0289855	0.0333333	0.0344828	0.0277778	0.0344828	0.0333333	0.0454545	0.0333333	0.030303	0.0344828
CHOL_M1557	0.0338983	0.047619	0.0384615	1	0.0238095	0.0454545	0.0333333	0.047619	0.0227273	0.0357143	0.0384615	0.0363636	0.0444444	0.0408163	0.0434783	0.04	0.0408163	0.0434783	0.0227273	0.0232558	0.0487805	0.0465116	0.0465116	0.0277778	0.0416667	0.0298507	0.0289855	0.0212766	0.0425532	0.0483871	0.0238095	0.0222222
CHOL_M1583	0.0434783	0.037037	0.027027	1	0.0327869	0.0163934	0.0333333	0.0266667	0.0224719	0.0294118	0.0285714	0.0163934	0	0.0367647	0.025974	0.0307692	0.0333333	0.031746	0.026616	0.0163934	0.0163934	0.0327869	0.015625	0.0333333	0.028169	0.015625	0.031746	0.0273973	0.021978	0.0327869	0	0.0327869
CHOL_M167	0.0226244	0.0377358	0.0238095	1	0.0307692	0.0196078	0.0322581	0.0375	0.0322581	0.0392157	0.0363636	0.03125	0.04	0.0196078	0.04	0.0338983	0.0392157	0.0306122	0.0384615	0.0377358	0.0392157	0	0.0178571	0.037037	0.0333333	0.0185185	0.0333333	0.0333333	0.0363636	0.0350877	0	0.0185185
CHOL_M17	0.0318725	0.0274841	0.04	1	0.0327103	0.0138889	0.0384615	0.0212766	0.0354331	0.022508	0.0284974	0.0310559	0.0387097	0.0322581	0.0318021	0.0337079	0.025	0.0206897	0.0330882	0.0255102	0.0413223	0.0206897	0.0416667	0.0391061	0.0194805	0.0337423	0.0282486	0.0401786	0.0379747	0.0409357	0	0.0248447
CHOL_M1713	0.03125	0	0.0338983	1	0.0175439	0.025641	0.0350877	0.0344828	0.0454545	0.047619	0.0333333	0.0337079	0.0350877	0.025	0.0357143	0.0333333	0.0357143	0.028169	0.03	0	0.0340136	0.0357143	0.0315789	0.0253165	0.033557	0.0309278	0.0285714	0.0327869	0.0275862	0.0175439	0.0289855	0.0333333
CHOL_M1718	0.0357143	0.04	0.0434783	1	0.0454545	0	0.03125	0.0416667	0.0416667	0.0434783	0.0465116	0.0416667	0.0217391	0.0434783	0.0434783	0.0384615	0.04	0.0454545	0.0344828	0.0416667	0.04	0.0454545	0.0454545	0.0229885	0.0454545	0.0434783	0	0	0.0434783	0.0285714	0.0416667	0.0416667
CHOL_M20	0.022409	0.0248538	0.0289855	1	0.0237288	0.0289256	0.0220588	0.0198675	0.0282486	0.0354331	0.0328467	0.0294118	0.0206718	0.044335	0.0313589	0.0273141	0.0301887	0.025	0.028169	0.0314136	0.0201613	0.0246914	0.0219436	0.0173913	0.0366133	0.0208333	0.0260708	0.0276923	0.0220126	0.01875	0.021645	0.021978
CHOL_M204	0.0207101	0.0230769	0.0286976	1	0.0224719	0.0192837	0.020316	0.0183824	0.0246154	0.03125	0.0267857	0.0292208	0.0218182	0.034188	0.0271318	0.027027	0.034188	0.0242915	0.0296496	0.03125	0.0185185	0.0222717	0.0207612	0.00961538	0.0242718	0.0193798	0.021611	0.0229358	0.0223464	0.0149254	0.0224439	0.024024
CHOL_M2044	0	0	0.0454545	1	0.0434783	0.030303	0.0416667	0.0434783	0.0350877	0.0416667	0.0454545	0.0454545	0.0344828	0	0.0208333	0.0434783	0.0454545	0.0416667	0.0344828	0.00986842	0	0.0416667	0.0416667	0.0416667	0	0.0454545	0	0	0.037037	0.0487805	0.0416667	0.0434783
CHOL_M2048	0.0298507	0.0188679	0.0298507	1	0	0	0.028436	0.030303	0.031746	0.0434783	0.0375	0.0273973	0.0181818	0.0327869	0.025	0.025641	0.0471698	0.0350877	0.031746	0.0307692	0.0294118	0	0.0266667	0.0377358	0.0275229	0.0394737	0.0241935	0.0192308	0.0333333	0.0277778	0.0192308	0.028777
CHOL_M213	0.0429448	0.0149254	0.0269058	1	0.0418848	0.0273973	0.0229885	0.020979	0.0318471	0.0318471	0.0239234	0.0384615	0.0233918	0.0336538	0.0416667	0.021097	0.0242718	0.0246305	0.0276498	0.0212766	0.0227273	0.0337838	0.0151515	0.0212766	0	0.0318182	0.0273224	0.0150376	0.0222222	0.0204082	0.0147059	0
CHOL_M23	0.0378378	0.0128205	0.0244898	1	0.0424528	0.0238095	0.0309278	0.0181818	0.027933	0.027933	0.0238095	0.0338164	0.0207254	0.0349345	0.0368421	0.0272374	0.0219298	0.0222222	0.0251046	0.0233645	0.0237624	0.0294118	0.012987	0.0184049	0.0170455	0.0289256	0.0243902	0.0129032	0.0241546	0.0177515	0.0126582	0
CHOL_M235	0.0333333	0.027027	0.0294118	1	0.0238095	0.0491803	0.0333333	0.0306122	0.0229885	0.0327869	0.0307692	0.025	0.0275229	0.0405405	0.0365854	0.0307692	0.0253165	0.0277778	0.0422535	0.0291262	0.0340909	0.038961	0.0166667	0.0267857	0	0.0285714	0.0322581	0.027027	0.032967	0.03125	0.0280374	0.030303
CHOL_M25	0.0277778	0.0265487	0.0337079	1	0.0366972	0.0276243	0.0352941	0.0331126	0.0239726	0.036036	0.032967	0.0319149	0.0227273	0.0300752	0.0322581	0.0483871	0.0444444	0.021978	0.0285714	0.034965	0.0377358	0.027972	0.0240964	0.027027	0.0333333	0.0408163	0.0412371	0.0254237	0.0366972	0.0299401	0.0196078	0.0275229
CHOL_M257	0.0188679	0.0320513	0.0238095	1	0.0232558	0.0347826	0.0243902	0.0261438	0.0384615	0.0206186	0.0229885	0	0.0240964	0.0375	0.0291262	0.0263158	0.0238095	0.0217391	0.0227273	0.0235294	0.0272727	0.0277778	0.0192308	0.027027	0.0212766	0.025974	0.0260417	0.0222222	0.0265487	0.0275229	0.0230769	0.0258621
CHOL_M287	0.0462428	0.0454545	0.0285714	1	0.0201729	0.0160428	0.0326087	0.0179641	0.0362694	0.0482456	0.0252525	0.0238095	0.0222222	0.0294906	0.0421687	0.042328	0.0212766	0.0327869	0.0227273	0.0323887	0.027451	0.042328	0.030303	0.0377358	0.0352941	0.0229885	0.0285714	0.0188679	0.048583	0.0313725	0.0120482	0.0228571
CHOL_M30	0.0289855	0.025	0.025974	1	0.0215054	0.0428571	0.0289855	0.0309278	0.0247934	0.0285714	0.027027	0.0224719	0.0254237	0.0361446	0.032967	0.027027	0.0227273	0.0247525	0.0418118	0.0267857	0.0309278	0.0348837	0.0144928	0.0247934	0	0.0253165	0.0294118	0.0240964	0.03	0.0273973	0.0258621	0.0340909
CHOL_M32	0.0307692	0.0222222	0.0465116	1	0	0.0392157	0.0227273	0.0222222	0.0350877	0.0266667	0.0444444	0.0217391	0.025641	0.030303	0.0327869	0.0344828	0.0434783	0.0434783	0.0322581	0.027027	0.037037	0.0344828	0.0212766	0.0283019	0.0408163	0.0333333	0.030303	0.0493827	0.0454545	0.0357143	0.0222222	0.0384615
CHOL_M34	0.0253165	0.029703	0.0416667	1	0.0357143	0.0408163	0.0357143	0.0204082	0.0285714	0.0204082	0.0192308	0.0204082	0.0384615	0.0196078	0.0348837	0.0204082	0.0204082	0.025974	0.0377358	0.0327869	0.0333333	0.0392157	0.04	0.032967	0.04	0.0172414	0.025641	0.0416667	0.0425532	0.0384615	0.037037	0.0204082
CHOL_M347	0.0416667	0.0285714	0.0344828	1	0.0357143	0.0357143	0.0344828	0.037037	0	0.0357143	0.0357143	0.0344828	0.0344828	0.0322581	0.0357143	0.0294118	0.0344828	0.03125	0.0357143	0.0285714	0	0.037037	0.030303	0.0344828	0	0.025641	0	0.0333333	0	0.0322581	0	0.037037
CHOL_M377	0.0241546	0.0373832	0.0263158	1	0.0273973	0.0285714	0.0421053	0.0458716	0.0232558	0.0294118	0.0248447	0.0310559	0.0222222	0.0378788	0.0396825	0.0444444	0.0243902	0.0344828	0.025	0.023622	0.025	0.0357143	0.0206186	0.0333333	0.030303	0.0330579	0.0336134	0.0344828	0.0319149	0.0357143	0.0215054	0.0322581
CHOL_M38	0.0176991	0.0306748	0.0229008	1	0.0215054	0.0327869	0.0230769	0.025	0.036036	0.0192308	0.0212766	0	0.0222222	0.0344828	0.0272727	0.0247934	0.0225564	0.020202	0.0210526	0.0309278	0.025641	0.027027	0.0184049	0.0254237	0.0263158	0.0248447	0.0251256	0.0224719	0.025	0.0258621	0	0.0243902
CHOL_M40	0.0235849	0.0337079	0.02	1	0.030303	0.0384615	0.0338983	0.0384615	0.0377358	0.0185185	0.0352941	0.0285714	0.0408163	0.0344828	0.0365854	0.0307692	0.0206897	0.04	0.0185185	0.030303	0.0350877	0.0384615	0.031746	0.0223464	0.030303	0.0196078	0.0377358	0.0196078	0.02	0.03125	0.00959693	0.0392157
CHOL_M505	0.030303	0.0166667	0.0208333	1	0	0	0.0327869	0.0166667	0.0166667	0.0163934	0.015873	0.0166667	0.0344828	0.0405405	0.0253165	0	0.0212766	0.0289855	0	0.0169492	0	0.0327869	0.013369	0.0365854	0.0169492	0.0169492	0.0163934	0.0352941	0.0169492	0	0.0169492	0.0263158
CHOL_M57	0.027027	0.0293333	0.0278592	1	0.00696864	0.0252525	0.0306569	0.0359589	0.0316302	0.0307692	0.0231884	0.0220441	0.0246407	0.0243902	0.037196	0.0212766	0.0241935	0.030303	0.020202	0.0288136	0.0241477	0.028777	0.0304288	0.0294118	0.0200669	0.0188679	0.0204724	0.0239234	0.0314961	0.033033	0.0273438	0.0331492
CHOL_M606	0.0232558	0.0283019	0.0252525	1	0.029703	0.0272727	0.0282486	0.0227273	0.0366972	0.0217391	0.0340909	0.0348837	0.0277778	0.0319149	0.0340909	0.0315789	0.0305344	0.0258621	0.045045	0.0227273	0	0.0326087	0.038835	0.029703	0.0222222	0.0225564	0.021978	0.0252101	0.03	0.0212766	0.0198413	0.03
CHOL_M608	0.04	0.028169	0.0294118	1	0.027027	0.0144928	0.028169	0.0434783	0.0319149	0.0224719	0.039604	0.027027	0.03	0.0289855	0.025974	0.037037	0.03	0.0310559	0.0294118	0.0217391	0.0294118	0.025641	0.04	0.0266667	0.027027	0.0273973	0.0140845	0.0288462	0.0211268	0.0289855	0	0.0232558
CHOL_M613	0.032967	0.0174927	0.0232558	1	0.0232558	0.0138889	0.026087	0.0272727	0.0273973	0.036036	0.0335196	0.0217391	0.0267857	0.0283019	0.0246914	0.0248447	0.04	0.0263158	0.0243902	0.0277778	0.0306122	0.0136986	0.0215827	0.0310078	0.0234375	0.031746	0.0266667	0.0140845	0.0253165	0.021978	0.0140845	0.0428571
CHOL_M625	0.0306122	0.0243902	0.0387597	1	0.0309278	0	0.0299625	0.0204082	0.0222222	0.0365854	0.0344828	0.0191781	0	0.0253165	0.0333333	0.0253165	0.0243902	0.0235294	0.0348837	0.0131579	0.0238095	0.025	0.012987	0.0263158	0	0.0243902	0.0245902	0.030303	0.043956	0.027027	0.0243902	0.0224719
CHOL_M629	0.0408163	0.037037	0.031746	1	0.0344828	0.0192308	0.0327869	0.0181818	0.0307692	0.0253165	0.0222222	0.0181818	0.0192308	0.0277778	0.037037	0.0363636	0.0206897	0.0416667	0.025974	0.0185185	0.0212766	0.0327869	0.040404	0.0285714	0.031746	0.030303	0.0185185	0.0175439	0.0212766	0.0377358	0.020979	0.025641
CHOL_M632	0.025	0.0322581	0.0277778	1	0.0253165	0.019802	0.0247934	0.0267857	0.0204082	0	0.0267857	0.0238095	0.0243902	0.0264317	0.0308642	0.0380952	0.0240964	0.0333333	0.0239521	0.0227273	0.025641	0.0126582	0.0240964	0.0252101	0	0.0307692	0.0337079	0.0253165	0.0238095	0.0288462	0	0.03
CHOL_M662	0.028169	0.0434783	0.0243902	1	0.025641	0.0285714	0.0246914	0.0289855	0.0263158	0.0252101	0	0.0423729	0	0.027933	0.0416667	0.03	0.028169	0.0380952	0.0416667	0.0266667	0.0283688	0.0322581	0.0224719	0.0206897	0.0408163	0.0243902	0.0266667	0.028169	0.0326087	0.025974	0.0266667	0.025641
CHOL_M693	0.0307692	0.0384615	0.0340909	1	0.0192308	0.037037	0.0333333	0.0392157	0.0185185	0.030303	0.0322581	0.0307692	0.0363636	0.0338983	0.0357143	0.0350877	0.0338983	0.0357143	0.0338983	0.0298507	0.0243902	0.040404	0.0377358	0.0254237	0.0344828	0.025974	0.0253165	0.0253165	0.0350877	0.0416667	0.0192308	0.0350877
CHOL_M696	0.0454545	0	0.04	1	0.0434783	0.0454545	0.037037	0.047619	0.0434783	0.0416667	0.047619	0.0416667	0	0.0357143	0.0454545	0.047619	0.047619	0.0434783	0.0454545	0.0434783	0.0434783	0.047619	0.0416667	0	0.0333333	0	0.0454545	0.03125	0.0454545	0.0454545	0.0454545	0.0454545
CHOL_M700	0.0206186	0.0214425	0.026087	1	0.0202429	0.0162162	0.0273973	0.0253165	0.0210843	0.0254777	0.0346535	0.0258065	0.0136986	0.0255102	0.025974	0.0344828	0.0196078	0.0298507	0.0248756	0.0136054	0.0228137	0.0210526	0.02	0.0217391	0.0277778	0.0255474	0.0188679	0.0192308	0.0277778	0.0242424	0.0213904	0.0251256
CHOL_M706	0.0314136	0.0243902	0.026087	1	0.0194175	0.0194175	0.0288462	0.0258621	0.030303	0.0186916	0.0196078	0.0192308	0.0227273	0.0308483	0.03125	0.024	0.0431034	0.0272727	0.0331126	0.0259067	0	0.0194175	0.0190476	0.0243902	0.0267857	0	0.023622	0.0232558	0	0.0194175	0	0.0194175
CHOL_M711	0.0227273	0.0444444	0.0454545	1	0.0227273	0.0227273	0.0425532	0.0465116	0.0327869	0.0363636	0.0454545	0.0222222	0.0384615	0.0465116	0.0392157	0.0444444	0.0217391	0.0434783	0.043956	0.0212766	0.0253165	0.0222222	0.0327869	0.0384615	0.0283019	0.0384615	0.0227273	0.0212766	0.0319149	0.0217391	0.0217391	0.0222222
CHOL_M795	0	0.0333333	0.025974	1	0.0294118	0.0315789	0.027027	0.0204082	0.0229885	0.0363636	0.040404	0.0275229	0.021978	0.0442478	0.0357143	0.028169	0.0277778	0.0273973	0.025641	0.0416667	0.0246914	0.0288462	0.0238095	0	0.0396825	0.026087	0.0238095	0.0266667	0.0245399	0.0263158	0.038961	0.0211864
CHOL_M810	0.0392157	0.025	0.027027	1	0.0447761	0.0224719	0.027027	0.0263158	0.03	0.03	0.0333333	0.040404	0.0265487	0.0357143	0.0273973	0.0238095	0.0267857	0.0275862	0.03125	0.0263158	0.025974	0.032967	0.025641	0	0	0.026455	0.032	0	0.0232558	0.0340909	0.025974	0
CHOL_M82	0.0273973	0.0142857	0.0140845	1	0	0	0.028169	0.0142857	0.0140845	0.0140845	0	0.0142857	0.0294118	0.0357143	0.0357143	0	0.0144928	0.0253165	0	0.0144928	0	0.028169	0.0130208	0.0326087	0.0285714	0.0144928	0	0.0315789	0.0204082	0	0.0144928	0.0232558
CHOL_M847	0.0227273	0	0.0192308	1	0.0357143	0.0392157	0.0338983	0.037037	0.0263158	0.0298507	0.0338983	0.0196078	0.0377358	0.0285714	0.0291262	0.0392157	0.0192308	0.0322581	0.0185185	0	0.0192308	0.0384615	0.0238095	0.025	0.028169	0.0344828	0.0392157	0.0333333	0.0238095	0.025	0	0.0192308
CHOL_M85	0.0246305	0.0314465	0.0306122	1	0.0363636	0.0163043	0.0277778	0.0228571	0.0304054	0.0271739	0.0215827	0.0291667	0.030303	0.0241935	0.0242718	0.0255319	0.021164	0.0192308	0.0278884	0.0246154	0.0194805	0.0357143	0.0322581	0.025	0.0167598	0.019802	0.0289256	0.0134228	0.0348259	0.0272374	0.0245399	0.0204082
CHOL_M93	0.030303	0.0227273	0.0222222	1	0.0344828	0.0217391	0.0350877	0.0227273	0.0444444	0.0217391	0.0227273	0.0294118	0.0168067	0.0289855	0.0416667	0.0222222	0.0377358	0.0344828	0.0338983	0	0.0266667	0.0392157	0.037037	0	0.0227273	0.0307692	0.0285714	0.0227273	0.0212766	0.0444444	0.0222222	0.0392157
COAD_M306	0.0454545	0.0322581	0.0333333	0.0425532	1	0.0294118	0.0379747	0.0232558	0.0444444	0.0377358	0.0392157	0.0322581	0	0.0422535	0.0171429	0.037037	0.0408163	0.0322581	0.0265487	0.0344828	0.0289855	0.0416667	0.0387597	0.027027	0.0327869	0.0392157	0.0266667	0.0307692	0.0163934	0.0333333	0	0
COAD_M31	0.0186916	0.0309278	0.0287356	0.0327103	1	0.0194175	0.0373832	0.0361991	0.0277778	0	0.0274725	0.0320513	0.0193548	0.034632	0.0257732	0.0215054	0.0285714	0.0263158	0.0384615	0.0283019	0.023622	0.0274725	0.0297872	0.025	0.0272727	0.0273224	0.0275862	0.0282486	0.0190476	0.0267857	0.0194175	0.0186916
COAD_M32	0.0347222	0.0266667	0.0352941	0.0253165	1	0.0266667	0.0294118	0.0375	0.0410959	0.0298507	0	0.0294118	0.029703	0.021978	0.0135135	0.0266667	0.0340909	0.0280374	0.0408163	0.0263158	0.0275229	0.025641	0.025641	0.0240964	0	0.0306122	0.0232558	0	0	0.0294118	0.027027	0.0405405
COAD_M46	0.0337079	0.0491803	0	0.0344828	1	0.0294118	0.0166667	0.037037	0.045977	0.025641	0.030303	0.0204082	0.0390625	0.0425532	0.025641	0.037037	0.031746	0.03125	0.0377358	0.031746	0.0327869	0.0379747	0.0344828	0.0357143	0.0277778	0	0.0277778	0.0124481	0.0377358	0.025641	0.031746	0.030303
DLBC_M1009	0.029304	0.0233161	0.0283401	0.0216718	0	1	0.0345395	0.0434783	0.0333333	0.0135747	0.04375	0.025641	0.0343511	0.026616	0.0434783	0.0328467	0.0238095	0.0282258	0.0289855	0.0225564	0.0354839	0.0267857	0.0291777	0.0258621	0.0269231	0.0334728	0.0284553	0.0323529	0.0360825	0.0220751	0.0229358	0.0135135
DLBC_M102	0.0258621	0.0186916	0.0232558	0.0183486	0.0216216	1	0.0234375	0.024	0.015544	0	0.0253807	0.0262172	0.0300752	0.018018	0.0248447	0.0300752	0.025	0.03125	0.0232558	0.0234375	0.02	0.0171149	0.029703	0.0222222	0.0271493	0.0285714	0.0283019	0.0245902	0.0245902	0.0283019	0.02	0.027027
DLBC_M103	0.027972	0.0263158	0.0272109	0.0172414	0.0229008	1	0.0466102	0.0319635	0.0438596	0.0225564	0.0483871	0.0289017	0.0337838	0.039548	0.0247934	0.0387097	0.03	0.0297619	0.0454545	0.0169492	0.0178571	0.0222222	0.0420168	0.0342857	0.0285714	0.0176991	0.025	0.0217391	0.0234375	0.0310881	0.027027	0.0319149
DLBC_M107	0.0294118	0.0229358	0.0229885	0.0257732	0.0283401	1	0.0206186	0.0239234	0.0199336	0.0294118	0.0346667	0.0245399	0.0223881	0.0256849	0.0324324	0.0243902	0.0196078	0.0259366	0.0462963	0.0239521	0.0278481	0.0301508	0.0366667	0.0222222	0.0269231	0.0193548	0.0291667	0.0251256	0.027933	0.0277778	0.0304054	0.0196078
DLBC_M1079	0.0185185	0.0168067	0.0218341	0.0176991	0.018315	1	0.0241935	0	0.0225564	0.020202	0.0253165	0.0245098	0.0214286	0.0245902	0.0175439	0.0215517	0.0212766	0.0253165	0.0234375	0.0265957	0.0236686	0.0265487	0.0294118	0.0215827	0.0225564	0.0251572	0.0201342	0.0283401	0.023622	0.023622	0.0217391	0.0176991
DLBC_M108	0.0327869	0	0.0326087	0.031746	0.025641	1	0.0294118	0.0273973	0	0.0178571	0.0294118	0.0185185	0.0232558	0.0344828	0.0211268	0.0172414	0.0377358	0.028169	0.0338983	0	0	0.0185185	0.0430108	0	0	0.0289855	0.0205479	0.0235294	0.0206897	0.0185185	0.0175439	0.0307692
DLBC_M1094	0.0338164	0.0347826	0.0285714	0.0277778	0.0289017	1	0.0307692	0.0372671	0.0231481	0.0201342	0.0316456	0.0421456	0.0316456	0.0338164	0.0396825	0.0227273	0.0333333	0.0223881	0.0254777	0.0320513	0.0328467	0.03125	0.0305344	0.0301205	0.032	0.0235849	0.031746	0.044335	0.0391304	0.0238095	0.0248963	0.0191388
DLBC_M1143	0.0253165	0.0277778	0.0285714	0.037037	0	1	0	0.0294118	0.0487805	0.0365854	0.0220588	0.0222222	0.0405405	0.0212766	0.0227273	0.0365854	0.0377358	0.0352941	0.0333333	0	0.0338983	0.0208333	0.0192308	0.0145631	0.0307692	0.030303	0.0384615	0.03125	0.0333333	0.03125	0.030303	0.037037
DLBC_M117	0.0284091	0.0202703	0.0223464	0.0239234	0.0285714	1	0.031746	0.0218978	0.0261438	0.0248963	0.0263158	0.0294118	0.0196078	0.0397727	0.0229008	0.021978	0.0280374	0.0245902	0.025641	0.019802	0.0247934	0.0204082	0.0254237	0.017341	0.0227273	0	0.0347826	0.023622	0.0230769	0.0196078	0.02	0.0283019
DLBC_M118	0.0222222	0.0222222	0.029703	0.0229885	0.0263158	1	0.0234375	0.0240964	0.032	0.025641	0.0275862	0.03125	0.0338983	0.0227273	0.0231214	0.0239521	0.0253165	0.0245399	0.0288462	0.0238095	0	0.025	0.0346821	0.0258621	0.0196078	0	0.0238095	0.0265487	0.0252101	0.0246914	0.0300752	0.0232558
DLBC_M119	0.0365854	0.0253165	0.0365854	0.0142857	0.0224719	1	0.02	0.0344828	0.0289855	0.0379747	0.028169	0.0238095	0.0277778	0.0344828	0.0298507	0.0289855	0.025974	0.0294118	0.0273973	0.0246914	0.03	0.0447761	0.0428571	0.0253165	0.0410959	0.0277778	0.0277778	0.024	0.0319149	0.0405405	0.0284091	0.027027
DLBC_M1190	0.0384615	0.0416667	0.031746	0.02	0.0307692	1	0.0172414	0.0344828	0	0.0384615	0.0483871	0.0192308	0.025974	0.0333333	0	0.03125	0.0289855	0.0204082	0.0196078	0.04	0.0377358	0.0480769	0.03125	0	0.0357143	0.02	0.0392157	0.0280374	0.0322581	0.0344828	0.037037	0.0204082
DLBC_M1192	0.0258621	0.0344828	0	0.02	0.0273973	1	0.0384615	0.0205479	0.037037	0	0.0258621	0.0222222	0.0188679	0.0111111	0.025	0.031746	0.027972	0.0232558	0.0289855	0	0.0298507	0.0253165	0.0208333	0.0169492	0.03125	0.02	0	0.0266667	0.04	0.0192308	0.0384615	0.0357143
DLBC_M1193	0.0416667	0.04	0.0357143	0.030303	0	1	0.0416667	0.0357143	0.0357143	0.0454545	0.0454545	0.0384615	0.047619	0.0416667	0.047619	0.0416667	0.047619	0.0416667	0.047619	0	0.04	0	0.0454545	0.0454545	0.0434783	0.0416667	0	0	0.0416667	0.037037	0.0454545	0
DLBC_M1197	0.0322581	0.0416667	0.0294118	0	0.04	1	0.0322581	0.037037	0.0333333	0	0	0.04	0.0416667	0.0434783	0.037037	0	0.0416667	0.0434783	0.04	0.0434783	0.037037	0.04	0.0434783	0.0416667	0.0416667	0.037037	0	0.0434783	0.0434783	0.0357143	0.0384615	0
DLBC_M1212	0.0266667	0.0222222	0	0	0.0222222	1	0.0384615	0.0291262	0.0204082	0.0357143	0.0227273	0.0350877	0.0410959	0.0217391	0.0357143	0.0217391	0.0222222	0.0344828	0.0277778	0.0384615	0.0465116	0	0.0208333	0.0144231	0	0.0188679	0	0.0273973	0.0384615	0.0217391	0.0322581	0.0434783
DLBC_M125	0.0408163	0.0253165	0.0461538	0	0	1	0.0384615	0.0434783	0.0416667	0.0350877	0.0212766	0.0204082	0.0384615	0.0434783	0.0333333	0.0408163	0.0217391	0.0434783	0.0232558	0.0392157	0.0344828	0.0425532	0.0327869	0.0333333	0.028169	0.020202	0.0217391	0.0204082	0.037037	0.0363636	0	0
DLBC_M1263	0.0357143	0.04	0.0384615	0.0416667	0.030303	1	0.0222222	0.0416667	0.0344828	0.037037	0	0.0333333	0.0465116	0.0384615	0.0416667	0.0416667	0.03125	0.0384615	0	0.04	0.0357143	0.04	0.037037	0.04	0	0	0	0	0.0357143	0.0344828	0	0.0322581
DLBC_M131	0	0.0285714	0.0285714	0.0434783	0.0222222	1	0.0227273	0.0392157	0.0434783	0.0188679	0.0232558	0	0	0.0243902	0.025974	0.0275229	0.047619	0.0425532	0.0434783	0.0425532	0	0.0405405	0.025	0.021978	0.0254237	0.0315789	0.0232558	0.0243902	0.0238095	0.0322581	0	0.025
DLBC_M1311	0.0384615	0.0434783	0.0285714	0.030303	0.0357143	1	0.0434783	0.0416667	0.0434783	0.0454545	0.0217391	0.0454545	0	0.030303	0.0434783	0.04	0.0416667	0.0277778	0.0465116	0.0416667	0.0434783	0.0434783	0.025	0.04	0.0416667	0.037037	0.0416667	0.04	0.037037	0	0.030303	0
DLBC_M1447	0.0362319	0.0357143	0.0380435	0.0235294	0.0422535	1	0.036036	0.0416667	0.0197368	0.0364964	0.0294118	0.0340909	0.0345912	0.0277778	0.0365854	0.0294118	0.041958	0.0346535	0.030303	0.0337079	0.043956	0.028436	0.0285714	0.034188	0.0322581	0.0442478	0.0271739	0.0275229	0.0384615	0.0268456	0.0360825	0.0326797
DLBC_M1458	0.0327381	0.0289256	0.0330396	0.0321101	0.0162602	1	0.0347222	0.0268456	0.0326797	0.0262626	0.0247525	0.0449102	0.0366972	0.0376344	0.035461	0.03125	0.0408163	0.0327869	0.027972	0.0360825	0.0424242	0.0387097	0.0313725	0.034749	0.027972	0.0297619	0.0380435	0.04	0.0418605	0.0341463	0.0472973	0.0464135
DLBC_M1509	0.030303	0.0238095	0.0227671	0.0220588	0.0254777	1	0.026455	0.038674	0.0296296	0.0148148	0.027027	0.0416667	0.0253165	0.0376344	0.0413793	0.0409357	0.0289017	0.0292398	0.0220588	0.022779	0.0299728	0.0388889	0.0275862	0.0200803	0.0239521	0.0194805	0.0243309	0.025974	0.0352423	0.0287356	0.0263158	0.0205479
DLBC_M1517	0.0300926	0.0217984	0.030837	0.0215385	0	1	0.0339559	0.0452675	0.0363636	0.0149254	0.0466667	0.027668	0.0329218	0.0288066	0.0428016	0.0354331	0.0248869	0.0307018	0.028463	0.0243902	0.037931	0.0285714	0.0308123	0.0247191	0.0255102	0.0365297	0.0294118	0.034375	0.0380435	0.0212766	0.0240385	0.0148515
DLBC_M1544	0.0180723	0.025641	0.0246914	0.0246914	0.0232558	1	0.0340909	0	0.0309278	0.025	0.0145985	0.0258621	0.0288462	0.029703	0.025641	0.025	0.0246914	0.025974	0.0193548	0.0261438	0	0.0288462	0.029703	0.0291262	0.0309278	0.0325203	0	0.0340909	0.0263158	0.032967	0	0.0190476
DLBC_M158	0.0454545	0.0243902	0.0298507	0.0238095	0.0232558	1	0.0408163	0.0243902	0.0243902	0.0357143	0.025	0	0	0.0222222	0.0307692	0.0238095	0.0243902	0.0246914	0	0.0222222	0.0285714	0.0243902	0.0232558	0.0289855	0.0465116	0.0384615	0.0344828	0.0285714	0.0422535	0.0243902	0	0.0222222
DLBC_M1647	0.0341615	0.0304569	0.031746	0.0275229	0.0183486	1	0.0384615	0.0263158	0.0359712	0.027027	0.0265957	0.0436137	0.0341463	0.0337423	0.03125	0.0333333	0.0382514	0.037037	0.0310078	0.0331492	0.0463576	0.0382979	0.033195	0.0367347	0.0310078	0.0324675	0.0350877	0.0430108	0.0344828	0.0366492	0.0444444	0.0447154
DLBC_M1656	0.031746	0.025	0.0230088	0.0230769	0.0264901	1	0.0273224	0.04	0.0310078	0.0155039	0.028169	0.0434783	0.025974	0.0388889	0.0422535	0.0424242	0.0299401	0.030303	0.0230769	0.0230947	0.0304709	0.0402299	0.027972	0.0205761	0.0248447	0.0202703	0.0246914	0.027027	0.0361991	0.0297619	0.0218978	0.0214286
DLBC_M1661	0.0297767	0.0258065	0.030303	0.0248447	0	1	0.0327869	0.0436681	0.0421053	0.0175439	0.0462963	0.0222222	0.0327103	0.0328638	0.0393013	0.0401786	0.026699	0.0353535	0.0281124	0.0277778	0.0383142	0.0333333	0.0304878	0.0240385	0.0301205	0.0368421	0.0304569	0.0308219	0.0383481	0.0243902	0.0232558	0.0174419
DLBC_M1686	0.037037	0.0238095	0.0181818	0.0267857	0.0223881	1	0.0301205	0.044586	0.036036	0	0.0232558	0.0342466	0.028169	0.0432099	0.0431034	0.047619	0.033557	0.0347826	0.0196078	0.0191847	0.0232558	0.0448718	0.0242131	0.0227273	0.0208333	0.0230769	0.0190476	0.0307692	0.0394089	0.0264901	0.0252101	0.0190476
DLBC_M17	0.0233813	0.0221402	0.0373984	0.0241935	0.021097	1	0.0255814	0.0295203	0.0268817	0.0173913	0.02	0.0207254	0.0234742	0.0399408	0.0272727	0.0314961	0.0259179	0.027027	0.0220264	0.0273973	0.0287611	0.0245902	0.0238095	0.0215054	0.021645	0.0185874	0.0223325	0.0208768	0.0344828	0.0236052	0.0285088	0.0189394
DLBC_M23	0.0230769	0.0289017	0.0176211	0.027027	0	1	0.0289855	0.0251572	0.0204082	0.0166667	0.0289855	0.0237154	0.0254777	0	0.0305344	0.0326797	0.028169	0.0227273	0.0423729	0	0.0196078	0.0169492	0.0165289	0.0163934	0.017094	0.0222222	0.0241935	0.0252101	0.0295203	0.0241935	0.0226244	0.0152672
DLBC_M245	0.039548	0.0430267	0.0452128	0.025	0	1	0.0245536	0.025641	0.0365854	0.0273775	0.0388802	0.0492424	0.0374787	0.043956	0.049922	0.0365385	0.0355872	0.020362	0.0379939	0.0371025	0.0332278	0.0448549	0.0384	0.0350109	0.0289855	0.0328228	0.0319149	0.0359281	0.037422	0.0316832	0.0348584	0.0347826
DLBC_M246	0.0392157	0.0289855	0.0350877	0.0410959	0.0258621	1	0.0416667	0.030303	0.0307692	0.0333333	0.0416667	0.025641	0.038961	0.0422535	0.0348837	0.0416667	0.0481928	0.03	0.0263158	0.0224719	0.0289855	0.0331492	0.0454545	0.030303	0.0273973	0.0289855	0.0229885	0.0183486	0.0315789	0.028169	0.0352941	0.0215054
DLBC_M248	0.0291971	0.0353982	0.0288462	0.0285714	0	1	0.0305344	0.0263158	0.0283019	0.0295858	0.029703	0.0192308	0.0275229	0.0280374	0.03	0.0285714	0.0338983	0.0336134	0.0344828	0.0272727	0	0.0265957	0.0342466	0.0211268	0.0448718	0.0217391	0.0255591	0.0275229	0.0296296	0.028777	0.0204082	0.029703
DLBC_M268	0.0386905	0.0425	0.0397727	0.0311284	0.0416667	1	0.0425	0.0319489	0.0391566	0.0254777	0.0226415	0.0358056	0.0286885	0.0351906	0.025974	0.030581	0.046832	0.0406699	0.0279188	0.0295858	0.0337268	0.0380952	0.0308943	0.0344828	0.0392157	0.0273556	0.0351438	0.0439024	0.048218	0.0337423	0.0289017	0.0290557
DLBC_M27	0.0225	0.0184758	0.0296392	0.0252525	0.0217391	1	0.0140056	0.0352941	0.0308824	0.00879765	0.0136612	0.0182768	0.0198413	0.0225564	0.0343915	0.031348	0.0206186	0.0263789	0.0202703	0.0231125	0.033101	0.028133	0.0263566	0.0175879	0.0253456	0.0212766	0.0241546	0.0235294	0.0297483	0.0220994	0.0164384	0.0112676
DLBC_M276	0.025641	0.0227273	0.0319149	0.0227273	0.0352941	1	0.027027	0.0377358	0.0319149	0	0.0222222	0.0408163	0.0487805	0.0322581	0.0338983	0.0238095	0.0238095	0.0408163	0.0408163	0.0273973	0.0384615	0.0384615	0.0238095	0.0238095	0.0232558	0.0465116	0	0.031746	0.0227273	0	0	0.0333333
DLBC_M321	0.0229885	0.030303	0	0.0266667	0	1	0.0291262	0.0350877	0.025641	0.0227273	0.0306122	0.025	0.029703	0.0210526	0.0465116	0.0462963	0.0306122	0	0.0305344	0	0.0266667	0.0273973	0.0210526	0.025974	0.0277778	0.0333333	0	0	0.0428571	0.027027	0.0284091	0.0232558
DLBC_M328	0.0229885	0.0206767	0.0262295	0.0180995	0.0201005	1	0.021645	0.0313901	0.0252427	0.0178571	0.0210526	0.0333333	0.0230415	0.0352423	0.0392749	0.032967	0.0232558	0.027027	0.0294118	0.02079	0.0268949	0.0361991	0.0273109	0.0189702	0.0194175	0.0205011	0.0311804	0.0204082	0.0335821	0.0231481	0.0259067	0.0171429
DLBC_M334	0.0367232	0.0340314	0.0295858	0.0246305	0	1	0.0362319	0.0459966	0.0308642	0	0.0447761	0.021164	0.0288184	0.0207254	0.0437158	0.026936	0.0212766	0.0318182	0.027972	0.0248756	0.0345821	0.028	0.0321199	0.0274223	0.0258398	0.0277778	0.025	0.0330969	0.0338983	0.0242537	0.0163399	0.0102041
DLBC_M337	0.0238095	0.0307692	0.0377358	0.0232558	0.030303	1	0.0289855	0.0204082	0.0377358	0.0344828	0.0232558	0.0263158	0.0289855	0.0344828	0	0.0327869	0	0.0350877	0.04	0	0.0243902	0.0238095	0.0243902	0	0.0333333	0.0408163	0.03125	0	0.0243902	0.0408163	0	0
DLBC_M340	0.0282486	0.045977	0.0408163	0.0277778	0.0444444	1	0.0384615	0.038835	0.032967	0.0227273	0.0227273	0.0352941	0.0238095	0.025641	0.025641	0.0310078	0.0273973	0.0253165	0.0336134	0.0254237	0.0258621	0.0357143	0.025641	0.0361446	0.0408163	0.0246914	0.0288462	0	0.0263158	0.0363636	0.0253968	0.029703
DLBC_M350	0.0238095	0.0327869	0.031746	0	0.04	1	0.0425532	0.0416667	0.0238095	0	0.0454545	0.047619	0.0222222	0.0487805	0.0454545	0.0246914	0.03125	0.0384615	0.0222222	0.0384615	0.047619	0.0487805	0.0357143	0.0192308	0.0465116	0.0384615	0.0363636	0.0227273	0.0238095	0.0392157	0	0.0487805
DLBC_M363	0.0461538	0.0363636	0.037037	0.0377358	0.0163934	1	0.0241935	0.0181818	0.0447761	0	0	0.036036	0	0.0340909	0.025974	0.0384615	0.0163934	0.0344828	0.0238095	0.0211268	0.037037	0.0181818	0.0307692	0	0.0263158	0	0.0263158	0.0181818	0.0211268	0	0.0185185	0.0285714
DLBC_M37	0.0260631	0.0252809	0.0214286	0.0232558	0.0108696	1	0.0277778	0.0203562	0.0257235	0.0194986	0.0203562	0.0233918	0.026393	0.0253521	0.024024	0.0315789	0.022293	0.0235756	0.0177936	0.0267559	0.0230179	0.0211082	0.028777	0.0301724	0.0320285	0.0106007	0.0196078	0.0245098	0.0277778	0.024911	0.013986	0.0131148
DLBC_M387	0.020202	0.0233766	0.0150754	0.0100503	0.0151515	1	0.0225806	0.02	0.0209205	0.024911	0.0247934	0.0219178	0.0249221	0.0186916	0.0144231	0.0141509	0.015	0.0202429	0.0213675	0.0182482	0.0188088	0.019305	0.0210084	0.0256822	0.0241379	0.0163265	0.0209424	0.030303	0.0174216	0.0179211	0.00985222	0.0173913
DLBC_M39	0.024	0.0296128	0.0282051	0.0123839	0.0275049	1	0.0319635	0.0294659	0.0298103	0.00625	0.0248344	0.0376106	0.01983	0.026455	0.0275591	0.0304709	0.0174564	0.0262009	0.0235602	0.0268097	0.0344828	0.0236364	0.026534	0.0269608	0.03	0.017199	0.0357143	0.0302267	0.0264901	0.0253165	0.0118694	0.0176322
DLBC_M393	0.0275229	0.0375	0.0403226	0.025641	0.0235294	1	0.0344828	0.0232558	0.0465116	0	0.0381679	0.0405405	0.0196078	0.0266667	0.0416667	0.027907	0.0254777	0.0465116	0.0357143	0.0314961	0.0394737	0.0340909	0.0283019	0.0277778	0.0215054	0.0246914	0.0268456	0.0261438	0.025974	0.0363636	0.0227273	0.0384615
DLBC_M394	0.0316742	0.0327869	0.0289017	0.0253165	0.026738	1	0.0277778	0.0342857	0.0219298	0.0184049	0.0290698	0.04	0.0290698	0.0316742	0.0357143	0.0210526	0.0304878	0.0202703	0.0234375	0.0294118	0.03125	0.028169	0.0275862	0.0280899	0.030303	0.0266667	0.0303951	0.0414747	0.0368852	0.0214286	0.0235294	0.0208333
DLBC_M41	0.024911	0.0295203	0.0373832	0.0243902	0	1	0.0383275	0.0257353	0.0353357	0.019305	0.0213675	0.0270936	0.0352113	0.0266272	0.0444444	0.0307692	0.0296128	0.0394366	0.0267559	0.0260586	0.0260163	0.0320856	0.037931	0.0294118	0.0310078	0.0269058	0.0230548	0.0226586	0.0283401	0.0292887	0.0273973	0.0284091
DLBC_M443	0.0246914	0	0.0338983	0.025641	0.0344828	1	0.0416667	0.0204082	0.0350877	0.0117371	0	0.0363636	0.0208333	0.0254777	0.047619	0.03125	0.0392157	0.0384615	0.037037	0.0263158	0	0.0212766	0.0337079	0.0363636	0.0416667	0.0206186	0	0	0.0204082	0.0333333	0.0196078	0.0434783
DLBC_M444	0.025974	0.0341463	0.0294118	0.025974	0.0277778	1	0.027027	0.047619	0.027972	0.0235294	0.0294118	0.0215385	0.0361446	0.0224719	0.042654	0.041958	0.027027	0.030303	0.0263158	0.034965	0.0326087	0.0182648	0.0229885	0.0188679	0.025974	0.0423729	0.0206186	0	0.0294118	0.025641	0.0266667	0.0240964
DLBC_M446	0.030303	0.0333333	0	0.0344828	0	1	0.0344828	0	0.0333333	0.0384615	0	0.0322581	0	0.0350877	0.037037	0.0384615	0.0357143	0.0344828	0.0285714	0.0384615	0.030303	0	0.0357143	0.0384615	0.030303	0.0344828	0.0384615	0	0.0357143	0.0357143	0	0.0357143
DLBC_M447	0.0344828	0	0.0344828	0	0	1	0.0344828	0.0229885	0.0357143	0.0322581	0	0.0434783	0.0333333	0.0322581	0	0.0357143	0	0.0294118	0	0.0294118	0	0.017094	0	0.03125	0	0.0322581	0	0.0333333	0.0357143	0	0.0377358	0
DLBC_M452	0.0350877	0.0319149	0.0461538	0	0.0189274	1	0.0384615	0.0227273	0.0307692	0.0425532	0.037037	0.0333333	0.0298507	0.0245399	0.0350877	0.0309278	0.03125	0	0.0348837	0.025974	0.0196078	0.0375	0.0408163	0.0425532	0.0350877	0.0307692	0.0361446	0.0327869	0.0408163	0.0307692	0.02	0.0306122
DLBC_M488	0.0215054	0.0288462	0.0242915	0.0215517	0.0233918	1	0.0274725	0.0221239	0.0247934	0.018018	0.0242718	0.0240964	0.0272374	0.025	0.0268456	0.0396476	0.0357143	0.0280702	0.0274914	0.0211268	0.0273556	0.0404624	0.0236967	0.0168067	0.0238095	0.0162602	0.0179641	0.0225989	0.0305344	0.0163934	0.0162602	0.0276243
DLBC_M490	0.0344828	0.0487805	0.0294118	0.0215054	0	1	0.037037	0.03125	0	0	0	0.0344828	0.0392157	0.037037	0	0	0.0224719	0	0.0212766	0.0344828	0.0384615	0.04	0.037037	0.037037	0.0384615	0.028169	0.0357143	0.0285714	0.037037	0.0294118	0	0.031746
DLBC_M501	0.0333333	0.032	0.0463576	0.0272727	0.0308642	1	0.0248447	0.0470588	0.0331126	0.0189036	0.0322581	0.0254237	0.0310881	0.0318471	0.0295359	0.0344828	0.033557	0.0290698	0.0294118	0.0454545	0.0245902	0.0232558	0.0350877	0.0245902	0.0421687	0.0265487	0.047619	0.0265487	0.0338983	0.0357143	0	0.0272727
DLBC_M503	0.0240964	0	0	0	0.0188679	1	0.0348837	0.03125	0.0357143	0.03125	0.0192308	0.0307692	0.037037	0.0185185	0.03125	0.0266667	0.0188679	0.0273973	0.031746	0.0333333	0.0285714	0	0.0178571	0.0138889	0	0.0163934	0	0.0246914	0.0333333	0.0185185	0.0327869	0.0294118
DLBC_M511	0.0340909	0.0333333	0.0327869	0.0333333	0.031746	1	0	0.0266667	0.0151515	0.030303	0.0333333	0.0298507	0.0294118	0.0289855	0.0434783	0.0280374	0.023622	0.030303	0.013986	0	0.0196078	0.0483871	0.0347826	0.0327869	0.0413223	0.0289855	0.0347826	0.0264901	0.0289855	0.0307692	0.0291262	0.025
DLBC_M531	0.0434783	0.0357143	0.0322581	0.0322581	0	1	0.0357143	0	0.0416667	0	0	0.0454545	0.0434783	0.03125	0.0344828	0.0434783	0.04	0.030303	0.0344828	0	0.0454545	0	0.0434783	0.0434783	0.0357143	0	0.0384615	0.027027	0	0.0333333	0	0
DLBC_M544	0.0294118	0.0377358	0.0294118	0	0	1	0.0277778	0.0338983	0.0294118	0.025641	0.0277778	0.025641	0.0277778	0.025	0.0487805	0.0285714	0.0285714	0	0.0357143	0.0285714	0.0434783	0.0263158	0.0263158	0.0243902	0	0.0285714	0.0294118	0.0266667	0.0217391	0.0263158	0.0285714	0.0263158
DLBC_M55	0.0393443	0.0283019	0.0275229	0.026699	0.0237288	1	0.0167364	0.0336134	0.0225	0.0302267	0.0272727	0.0347222	0.0269058	0.027027	0.0403727	0.0352941	0.0208333	0.0263158	0.0260417	0.0285714	0.0225564	0.0217391	0.0214286	0.0231481	0.0155039	0.0347826	0.0232558	0.0104167	0.0272727	0.0261194	0.0218688	0.0206897
DLBC_M591	0.0412371	0.030303	0.0310559	0.0238095	0.0144928	1	0.0218978	0.0410959	0.0285714	0.0428571	0.038835	0.0283019	0.0413223	0.0290698	0.0422535	0.0244755	0.04	0.0319149	0.0253165	0.0240964	0.0243902	0.0277778	0.0243902	0.0253165	0.025974	0.0350877	0.03	0.021978	0.027027	0.037037	0.025974	0
DLBC_M618	0.04	0.0384615	0.0322581	0.0384615	0.0322581	1	0.0357143	0	0.0344828	0.037037	0.0285714	0.0185185	0.0322581	0.0344828	0	0.037037	0.0357143	0.0357143	0.0322581	0.0384615	0.037037	0.03125	0.0294118	0.0384615	0	0.0357143	0.027027	0	0.04	0.0277778	0	0
DLBC_M621	0.0454545	0.0246914	0.0227273	0.0232558	0.030303	1	0.0217391	0.0232558	0.0283019	0	0.0425532	0.0263158	0.0232558	0	0.0307692	0.047619	0.0344828	0.0285714	0.0222222	0.0322581	0.030303	0.0416667	0.02	0	0	0.0232558	0.0227273	0.030303	0.03125	0.0246914	0.0227273	0.0408163
DLBC_M656	0.0194805	0.031746	0.030303	0.0253165	0.0449438	1	0.0217391	0.0392157	0.0291262	0.0208333	0.0322581	0.0289855	0.0392157	0.03125	0.031746	0.0392157	0.0363636	0.0322581	0.037037	0.0377358	0.0196078	0.0384615	0.0307692	0	0.0252101	0.02	0.0461538	0.0285714	0.0253165	0.0294118	0.02	0.0377358
DLBC_M66	0.019802	0.0265487	0.0273038	0.0203562	0.019685	1	0.0217391	0.011976	0.0272109	0.0211082	0.0238095	0.0240964	0.0245098	0.0261194	0.0203046	0.0373626	0.0328947	0.0302115	0.0235988	0.021164	0.0320856	0.0316742	0.0232558	0.0201794	0.0208333	0.0229885	0.028169	0.0223214	0.0223464	0.0117647	0.0190114	0.0218341
DLBC_M684	0.025	0	0.0434783	0.0416667	0.0333333	1	0.047619	0.0416667	0.047619	0.0434783	0.04	0.03125	0.0333333	0.0222222	0.0357143	0.0454545	0.04	0.0454545	0	0.0285714	0	0	0.0357143	0.0434783	0.04	0.047619	0.0416667	0.0384615	0.0277778	0.0434783	0.0416667	0
DLBC_M70	0.0384615	0.0416667	0	0.0425532	0.0425532	1	0.0204082	0.0392157	0.0408163	0.0425532	0.0294118	0.0344828	0	0	0.0408163	0.0285714	0.0357143	0.037037	0.04	0.0363636	0.02	0.037037	0.0392157	0.0363636	0.030303	0.0408163	0.0204082	0.0357143	0.0416667	0.0392157	0.0185185	0.04
DLBC_M718	0.0180723	0	0	0.037037	0	1	0.025641	0	0.037037	0.0454545	0.0277778	0.0344828	0	0.0322581	0.0333333	0.0444444	0.0206186	0.0208333	0	0	0.0344828	0.0384615	0.0384615	0.0322581	0	0.0357143	0.037037	0.037037	0	0.0357143	0.0333333	0.0363636
DLBC_M72	0.03125	0.0201207	0.0145985	0.0150376	0	1	0.0227273	0.0212766	0.0241935	0.0152672	0.0211268	0.0223464	0.0229008	0.021978	0.0267857	0.0197368	0.025974	0.0204082	0.0236887	0.0144928	0.0140845	0.0170455	0.0229008	0.0235294	0	0.0206186	0.0136054	0.0186335	0.0211268	0.0271493	0.024911	0.0227273
DLBC_M729	0.0344828	0.0363636	0.0285714	0.0357143	0.031746	1	0.0227273	0.0217391	0.0296296	0	0.025974	0	0.0425532	0	0.0294118	0.0322581	0.039604	0.031746	0.0230769	0.0222222	0.0252101	0.0227273	0.0493827	0.031746	0.0232558	0.0253165	0.0333333	0.0229885	0.0266667	0.0227273	0.0384615	0.0425532
DLBC_M73	0.020979	0.03125	0.0227273	0.0153846	0.0150376	1	0.0229008	0.0212766	0.0217391	0.0213904	0.0218978	0.0223881	0.0222222	0.0287356	0.0318471	0.0221239	0.0204082	0.0188679	0.0237154	0.0214286	0.0222222	0.0227273	0.0271739	0.020979	0.0288809	0.0217391	0.0261438	0.0200573	0.0245399	0.0263158	0.017341	0.0152672
DLBC_M738	0.0425532	0.04	0.04	0.0434783	0.04	1	0.0434783	0.03125	0.0344828	0.0416667	0.03125	0	0.0416667	0.0357143	0	0.0416667	0.04	0.0384615	0.0322581	0.0384615	0.0344828	0.04	0.0357143	0	0	0.0243902	0	0.0285714	0.0322581	0.04	0.0273973	0
DLBC_M744	0	0	0	0	0.0333333	1	0.04	0	0.04	0.0294118	0.0454545	0	0	0.0217391	0.0487805	0.04	0	0	0.0357143	0.0185185	0.04	0.0434783	0.0384615	0	0	0	0	0	0.0263158	0.0487805	0	0
DLBC_M75	0.030303	0.0245399	0.0217391	0.0285714	0.02	1	0.0289855	0.0285714	0.0333333	0.0307692	0.0285714	0.0322581	0.0267857	0.025974	0.0222222	0.027027	0.020979	0.03125	0.0307692	0.0322581	0.0294118	0.0294118	0.0333333	0	0.031746	0.021978	0.0277778	0.030303	0.025974	0.0333333	0.0315789	0.03125
DLBC_M78	0.0218978	0.0283019	0.0247934	0.026087	0	1	0.0220588	0.0222222	0.025	0.0235294	0.0204082	0	0.0352113	0.0322581	0.0217391	0.0283019	0.0352941	0.0215054	0.021978	0.0232558	0	0.020202	0.0298507	0.0246914	0.023622	0	0.0229885	0.03125	0.021978	0.0210526	0	0
DLBC_M81	0.0482759	0.0482759	0.0392157	0.0264901	0.0297872	1	0.0414508	0.0374532	0.0358566	0.013245	0.0314136	0.0244648	0.0470085	0.0479452	0.0202429	0.0479452	0.0208333	0.019943	0.0280899	0.0410959	0.0251397	0.0258065	0.0410959	0.0328947	0.0276243	0.0191083	0.0265781	0.0245098	0.0340426	0.0322581	0.0229133	0.0319149
DLBC_M82	0.0382979	0.0343137	0.0352113	0.0171429	0.0298165	1	0.0327869	0.0217391	0.0336538	0.0201005	0.0195312	0.0220264	0.0231125	0.0207715	0.0241546	0.0305344	0.0281124	0.0267559	0.0317919	0.0371901	0.0304878	0.0264317	0.0291545	0.03367	0.0346154	0.0282486	0.0238095	0.0414938	0.0271493	0.0228571	0.0301887	0.0115607
DLBC_M828	0.0363636	0.0289855	0.0216216	0.0172414	0	1	0.0294118	0.029703	0.0277778	0.0234375	0.0128205	0.0283019	0.0472441	0.0238095	0.027027	0.0344828	0.03125	0.0263158	0.030303	0.0289855	0.0223881	0.032967	0	0.030303	0.0333333	0.0350877	0.0273973	0.0322581	0.0410959	0.0299625	0.0447761	0.0178571
DLBC_M861	0.0271739	0.027933	0.0304348	0.0203562	0.0362694	1	0.0298507	0.0301205	0.0262009	0.0273224	0.023166	0.0316742	0.0359116	0.0276423	0.0285714	0.0235294	0.031746	0.0282258	0.0224719	0.0267857	0.0376176	0.0294118	0.0259067	0.0277778	0.0248756	0.0314465	0.022293	0.0215517	0.0342857	0.0205128	0.0291667	0.0251256
DLBC_M872	0.0330579	0.0298211	0.0338266	0.0294118	0.013986	1	0.0304878	0.0236686	0.0348837	0.0272374	0.0298507	0.0453258	0.0379747	0.0339806	0.0310559	0.0286885	0.037037	0.028169	0.0268041	0.0327869	0.0378378	0.0363636	0.0290909	0.037037	0.0308642	0.0265957	0.0384615	0.0458716	0.0382979	0.0311284	0.0416667	0.0430108
DLBC_M891	0.0344828	0.032967	0.0340909	0.0337079	0.0204082	1	0.0306122	0.0283019	0.0333333	0.025974	0.0352941	0.0204918	0.0264901	0.0265487	0.0357143	0.0337079	0.0392157	0.0336134	0.0240964	0.0319149	0	0.0294118	0.0384615	0.0238095	0.0352113	0.0245902	0.026936	0.029703	0.0336134	0.0325203	0	0.0352941
DLBC_M939	0.04	0.0357143	0.03125	0.0322581	0	1	0.037037	0.04	0.037037	0.0344828	0	0.0357143	0.037037	0	0.04	0.0384615	0.028169	0.0357143	0.04	0.0350877	0.0333333	0.0384615	0.0322581	0.0384615	0	0.04	0	0.030303	0.0357143	0.0344828	0	0.0333333
DLBC_M94	0.0382166	0.0228571	0.0245098	0.0208333	0.0268817	1	0.0186916	0.0258621	0.0333333	0.0265487	0.0330579	0.0364146	0.0304878	0.0271493	0.0350877	0.02457	0.0465116	0.0228311	0.028169	0.0175439	0.0176056	0.0294118	0.0343137	0.0201342	0.0238095	0.0254777	0.020979	0.0266667	0.0406504	0.0259067	0.023622	0.0199005
DLBC_M998	0.0246914	0.0211538	0.0267559	0.0191388	0.0213904	1	0.0228311	0.0331754	0.0258449	0.0192308	0.0224719	0.0353535	0.0243902	0.0372093	0.0407524	0.0348259	0.0246305	0.0248756	0.0307692	0.021322	0.0277078	0.0382775	0.0280172	0.0196078	0.0206186	0.0210773	0.0320366	0.0217391	0.0351562	0.0245098	0.0276243	0.0180723
ESCA_M101	0.0499343	0.0409605	0.0388007	0.0171306	0.032197	0.0251451	1	0.0154242	0.0456323	0.0260736	0.018595	0.0171429	0.0185615	0.0227273	0.0227273	0.0309811	0.0254111	0.0294118	0.0478011	0.0231293	0.0271565	0.0347594	0.0308943	0.0346821	0.0453649	0.0236364	0.0288945	0.0232975	0.0203704	0.0302548	0.0136674	0.0132979
ESCA_M104	0.0350195	0.0315457	0.0324324	0.0231214	0.0384615	0.0241546	1	0.0347222	0.0272953	0.02	0.027972	0.0235294	0.0264317	0.0272109	0.0496894	0.0492754	0.0289855	0.0314465	0.0295082	0.0318471	0.0255754	0.0361446	0.028169	0.0214286	0.037037	0.0273973	0.0231481	0.0402685	0.0209424	0.0298507	0	0.0176991
ESCA_M1414	0.0344828	0.032967	0.034188	0.031746	0.03125	0.016129	1	0.0285714	0.0285714	0.0294118	0.0266667	0.0208333	0.0289855	0.0309278	0.0309278	0.046875	0.0322581	0.0461538	0.0447761	0.0266667	0.027027	0.0390244	0.025974	0.047619	0.048913	0.027027	0.027027	0.0263158	0.0280374	0.030303	0.012963	0.029703
ESCA_M1881	0.0416667	0	0.04	0.0416667	0.0384615	0	1	0.0434783	0.027027	0.0384615	0	0.0434783	0	0.0384615	0	0.0416667	0.0434783	0.0357143	0.0357143	0.037037	0.04	0.0384615	0.0344828	0.0322581	0.00666667	0	0.0416667	0	0.0294118	0.0416667	0	0
ESCA_M210	0.0333333	0.0375	0.0336134	0.0240964	0.030303	0.0425532	1	0.0326087	0.0483871	0.021978	0.0212766	0.0315789	0.04	0.025641	0.04	0.028777	0.0375	0.0333333	0.0454545	0.021978	0.0315789	0.0416667	0.0240964	0.0243902	0.0263158	0.0196078	0.025	0	0.025641	0.0266667	0	0.025
ESCA_M212	0.0431894	0.032	0.0333333	0.02	0.0272727	0.0218978	1	0.0252101	0.0454545	0.0215054	0.0212766	0.020979	0.023622	0.0215054	0.027027	0.0344828	0.0227273	0.0222222	0.0254237	0.0265487	0	0.0224719	0.0173913	0.0224719	0.0222222	0.0210526	0.0290698	0.0217391	0.0217391	0.020979	0.0277778	0.0173913
ESCA_M257	0.0273973	0.0368421	0.030303	0.0322581	0.025	0.0307692	1	0.037037	0.0416667	0.0253165	0.0266667	0.0277778	0.0210526	0.0327869	0.027027	0.0363636	0.0338983	0.0263158	0.021978	0.0353982	0.03125	0.0333333	0.0333333	0.0451128	0.0350877	0.0333333	0.0240964	0.03125	0.0492958	0.027027	0.0289855	0.0410959
ESCA_M34	0.0336134	0.0294985	0.0271739	0.0192308	0.0310811	0.0162037	1	0.0287356	0.0331754	0.020073	0.0157658	0.0347222	0.0238532	0.0268741	0.0284091	0.0284091	0.0193906	0.0382514	0.0286885	0.0181818	0.0209302	0.0291545	0.0336134	0.0219512	0.0255009	0.0267686	0.0130208	0.0137363	0.0245184	0.0258303	0.0219298	0.0164706
ESCA_M606	0.032967	0.0315789	0.0330579	0.0298507	0.03	0.0151515	1	0.027027	0.0326087	0.0277778	0.0253165	0.02	0.0357143	0.04	0.0348837	0.0441176	0.0309278	0.0434783	0.0422535	0.0253165	0.025641	0.0382775	0.0246914	0.0454545	0.0478723	0.025641	0.025641	0.025	0.027027	0.0285714	0.0128676	0.0285714
ESCA_M698	0.031746	0.0307692	0.025641	0.0243902	0	0	1	0.037037	0.0454545	0.0357143	0.037037	0.0322581	0	0.0333333	0.0348837	0.0285714	0.037037	0.0357143	0.0322581	0.0384615	0.0384615	0	0.0149813	0.03125	0	0.0232558	0	0.0333333	0.0357143	0	0.0273973	0.0344828
ESCA_M773	0	0.047619	0.0232558	0.0338983	0.0232558	0.0243902	1	0.0333333	0.0232558	0.0238095	0.0232558	0.0333333	0	0.0204082	0.0350877	0.0243902	0	0.0384615	0.0222222	0.0227273	0.037037	0.025	0.0238095	0	0.0243902	0.025641	0.0322581	0.025	0	0.0465116	0	0.025
ESCA_M774	0	0	0.0232558	0.025	0.025	0.0227273	1	0	0	0	0.0208333	0	0.02	0.0232558	0.0425532	0.03125	0	0.0333333	0	0.025	0.0350877	0	0.025	0	0.0434783	0.0267857	0.0363636	0.0298507	0	0.04	0.0238095	0.04
ESCA_M922	0.0319149	0.043956	0.04375	0.0294118	0.0350877	0.0373832	1	0.0480769	0.0338983	0	0.0288462	0.0246305	0.0264901	0.0274725	0.0462963	0.0462963	0.0438596	0.0480769	0.0454545	0.0421053	0.0322581	0.029703	0.0344828	0.0309278	0.027027	0.021978	0.026087	0.0215054	0.0229358	0	0.026087	0.0222222
GBM_M106	0.0319149	0.0291971	0.0265487	0.0185185	0.0222222	0.0267857	0.0263158	1	0.0238095	0.0222222	0.0234375	0.0280374	0.0487805	0.0378378	0.0263158	0.0363636	0.0197368	0.0381679	0.042735	0.028169	0.0222222	0.0301724	0.0324074	0.021978	0.0212766	0.0275862	0.0267857	0.0175439	0.021978	0.028169	0.027972	0.0227273
GBM_M1235	0.0253165	0.0246914	0.03	0.025	0.0210526	0.0229885	0.021978	1	0.0217391	0.025	0.0217391	0	0.0416667	0.0232558	0.037037	0.0240964	0	0.0224719	0.0229008	0.0406977	0.0326087	0.0235294	0.0384615	0.0253165	0.0212766	0.025	0.0333333	0.0294118	0.025	0.0238095	0	0.0243902
GBM_M1251	0.0363636	0.0217391	0.0434783	0.0222222	0	0	0.0222222	1	0.0222222	0.0377358	0.0265487	0	0.0350877	0.0428571	0.0217391	0.037037	0.0289855	0.0224719	0.0363636	0.0222222	0.0212766	0.025641	0.0338983	0.0405405	0.0222222	0.030303	0.028169	0	0.0217391	0.0217391	0.0208333	0.0222222
GBM_M1253	0.03125	0.02	0.0234375	0.0204082	0.0336134	0.029703	0.0194175	1	0.0202312	0.03	0.0252101	0.0206186	0.0268817	0.0305344	0.0217391	0.0327869	0.0315789	0.0206186	0.0230769	0.0210526	0.0234375	0.0233333	0.024	0.0269058	0.0225225	0.020202	0.0247748	0.0228311	0.0201342	0.020202	0.0179641	0.020202
GBM_M174	0.04	0.047619	0.0344828	0.0434783	0	0.04	0.047619	1	0.0434783	0.0384615	0.04	0.0416667	0.0416667	0.037037	0.04	0.0434783	0.0434783	0.0434783	0.0454545	0.047619	0	0.047619	0.0434783	0	0.04	0.0224719	0.0425532	0.037037	0	0.0454545	0	0.047619
GBM_M19	0.0277778	0.0207792	0.025	0.0181818	0.0288462	0.0176991	0.0150376	1	0.0330579	0.0238095	0.0205479	0.0172414	0.047619	0.0192308	0.0245902	0.0291971	0.025641	0.0280374	0.030303	0.0227273	0.0283688	0.0236686	0.0252101	0.0186916	0.0172414	0.0344828	0.0209424	0	0.0280374	0.0227273	0.0185874	0.027027
GBM_M230	0.0434783	0.0322581	0	0	0.0416667	0.0416667	0.04	1	0.0416667	0.0434783	0.0454545	0.047619	0.0434783	0.0434783	0.0454545	0.04	0.0434783	0.047619	0.0454545	0.0434783	0.0333333	0.0454545	0.0162602	0.0454545	0	0	0.04	0.0416667	0	0.027027	0.0145985	0.0416667
GBM_M24	0.0301205	0.0243902	0.025641	0.0222222	0.0215054	0	0.0229008	1	0.0344828	0.0200445	0.0291262	0.038835	0.0257732	0.0185185	0.0280374	0.0384615	0.0190476	0.0268456	0.0310078	0.0245399	0.028169	0.0190476	0.0277778	0.0196078	0.032	0.0381679	0.0215827	0.0229358	0.0211268	0.0283019	0.0228571	0.0265487
GBM_M25	0.0294118	0.0291971	0.0244898	0.0206186	0.0213904	0.02	0.0230769	1	0.025641	0.0210526	0.0254237	0.026087	0.0291262	0.019802	0.03	0.0210526	0.0272727	0.0194175	0.0257732	0.0245399	0.0188679	0.0206186	0.0204082	0.0215054	0.0292398	0.029703	0.0290698	0	0.0285714	0.0309278	0.0251572	0.026087
GBM_M29	0.0298507	0.0422535	0.0327869	0.0357143	0.0267857	0.0266667	0.0357143	1	0.0357143	0.0384615	0.025	0.0350877	0.0404624	0.030303	0.0338983	0.0384615	0.0344828	0.04	0.0285714	0	0.0375	0.0214286	0.031746	0.0377358	0.0192308	0.0322581	0.037037	0.04	0.028169	0.0384615	0.025641	0.0384615
GBM_M31	0.0257511	0.0398406	0.0325203	0.0245399	0.0285714	0.017094	0.0210084	1	0.0234375	0.025	0.038835	0.0272727	0.0431034	0.0286885	0.0289855	0.03125	0.0243902	0.0390625	0.0328947	0.0314961	0.0241935	0.0268456	0.0239044	0.0267857	0.0183486	0.0416667	0.0261438	0.0204082	0.0310881	0.0294118	0.0375	0.0423729
GBM_M359	0.0416667	0.0240964	0.0357143	0.0208333	0.0327869	0.0227273	0.0454545	1	0.0289855	0.0208333	0.0222222	0.0212766	0.0434783	0.0465116	0.0246914	0.0243902	0.0217391	0.0267857	0.0377358	0.0217391	0.031746	0.0454545	0.0357143	0.0377358	0.0408163	0.0273973	0.0217391	0.02	0.027027	0.03125	0	0.0307692
GBM_M377	0	0.037037	0	0	0	0	0.0344828	1	0.00952381	0.0454545	0	0	0.04	0	0.0357143	0.0434783	0.037037	0.0434783	0.0333333	0.0434783	0.0210526	0	0.0416667	0.0384615	0	0	0.0357143	0	0.037037	0.0454545	0.04	0.0434783
GBM_M41	0.0239521	0.0232558	0.0378151	0.0275229	0.0273973	0.0304878	0.0373134	1	0.0275862	0.019802	0.0277778	0.0307692	0.0495868	0.03125	0.025641	0.0247934	0.0275229	0.0322581	0.0258621	0.03	0.0344828	0.0235849	0.0220588	0.0379747	0.0225564	0	0.0214286	0.019802	0.036036	0.0336134	0.0209424	0.0337838
GBM_M44	0.035461	0.0387597	0.0245902	0.0204082	0.029703	0.0307692	0.0236686	1	0.026738	0.0205479	0.0263158	0	0.0416667	0.030303	0.026087	0.03125	0.0234375	0.0243902	0.0223881	0	0.0188679	0.0283019	0.0238095	0.0225564	0.0194805	0.025	0.0238095	0.021097	0.029703	0.0204082	0.0220588	0
GBM_M452	0.047619	0.047619	0.0238095	0.0243902	0.0238095	0.047619	0.021978	1	0	0.0267857	0.0272727	0.0227273	0.028169	0.0465116	0.0338983	0.0465116	0.0344828	0.0310078	0.0273973	0.047619	0.0232558	0.0408163	0.047619	0	0.027027	0.04	0.0277778	0.0232558	0.0357143	0.0491803	0.0322581	0
GBM_M46	0.0344828	0.0246914	0.0326087	0.0315789	0.0309278	0.0131579	0.0253165	1	0.046729	0.0243902	0.0238095	0.0287356	0.0347826	0.0229885	0.0240964	0.038961	0.0392157	0.027027	0.0344828	0.0275229	0.026087	0.025641	0.0352941	0.0246914	0.0357143	0.0333333	0.0215517	0.0266667	0.0245399	0.0344828	0.0184332	0.026178
GBM_M465	0.0295858	0.0261438	0.0229008	0.0229885	0.0203046	0.0153846	0.0232558	1	0.0233645	0.0217391	0.0265957	0.0150376	0.047619	0.0212766	0.0234375	0.0260417	0.0253807	0.0214286	0.0199005	0.027668	0.0193548	0.0189873	0.0351759	0.0174672	0.016129	0.0168919	0.0264901	0.0188679	0.0185185	0.0225564	0.0239521	0.0227273
GBM_M498	0.0405405	0.0361446	0.0322581	0	0.0285714	0.0326087	0.0319149	1	0.027027	0.0285714	0.028169	0.0294118	0.0482759	0.0299401	0.0319149	0.032967	0.0238095	0.0379747	0.0364964	0.03125	0.0285714	0.0353982	0.032967	0.028169	0.0253165	0.0277778	0.0326087	0	0.028169	0.025	0.03125	0.0294118
GBM_M52	0.0283019	0.0363636	0.0232558	0.037037	0.0205479	0.0275229	0.0327869	1	0.0357143	0.0363636	0.0334928	0.0444444	0.0444444	0.0384615	0.0333333	0.0344828	0.0192308	0.0333333	0.0235294	0.0392157	0.046875	0.0363636	0.03125	0.0392157	0.028169	0.0384615	0.0338983	0.025641	0.0315789	0.030303	0.0333333	0.0422535
GBM_M54	0.03125	0.021978	0.03	0.0307692	0.025974	0.0166667	0.0365854	1	0.028169	0.0238095	0	0.015873	0.033557	0.0315789	0.0206186	0.0210526	0.030303	0.0314961	0.0441176	0.016129	0.029703	0.0333333	0.0422535	0.0289855	0.0307692	0.026738	0.016129	0.030303	0.0222222	0.030303	0	0.0322581
GBM_M56	0.0212766	0.0172414	0.0357143	0.0344828	0	0	0.0434783	1	0.0204082	0.0350877	0.0322581	0.030303	0.0361446	0.027027	0.0277778	0.0210526	0.0169492	0.0350877	0.0394737	0.0307692	0.028169	0	0.0481928	0.030303	0	0.0235294	0.0232558	0.0277778	0.0325203	0.0166667	0.0172414	0.0289855
GBM_M58	0.0392157	0.0425532	0.0363636	0.0322581	0.0204082	0.0294118	0.0384615	1	0.0208333	0.0204082	0.0344828	0.037037	0.0483871	0.0363636	0.0204082	0.0408163	0.0363636	0.0375	0.0322581	0.0392157	0.0384615	0.0357143	0.031746	0.0307692	0.0428571	0.0208333	0	0.0333333	0.019802	0.0392157	0.0289855	0.0204082
GBM_M68	0.0201342	0.0315789	0.0266667	0.0235294	0.0175439	0.0172414	0.030303	1	0.0322581	0.0263158	0.028169	0.0344828	0.0338983	0.028169	0.0357143	0.025641	0.0215054	0.0178571	0	0.0327869	0.0294118	0.025	0.030303	0.0461538	0.0322581	0.0285714	0.037037	0.025	0.0357143	0.030303	0.0344828	0.0447761
GBM_M685	0.03125	0	0.0222222	0	0.0264901	0.0224719	0.0222222	1	0.0224719	0.0206186	0.0258065	0.0238095	0.027933	0.0263158	0.034188	0.0227273	0.0217391	0.0240385	0.0247934	0.0225564	0.0347826	0.0247934	0.026087	0.0276243	0	0.0258621	0.0173913	0.0228571	0.0205479	0.019802	0.0212766	0.021978
GBM_M686	0.0275229	0.0207715	0.0220994	0.017341	0.0275862	0.023622	0.0192308	1	0.0197368	0.0247678	0.0206897	0.0234375	0.025974	0.0254777	0.0230769	0.0284091	0.0247934	0.0217391	0.0271493	0.0222222	0.0294118	0.0214724	0.0198675	0.0240964	0.0211268	0	0.0243902	0.0245902	0.0217391	0.016	0	0.0228571
GBM_M94	0.0289855	0.0263158	0.0227273	0.0263158	0	0.0253165	0.0294118	1	0.0224719	0	0.0292398	0.030303	0.0357143	0.030303	0.030303	0.0277778	0.0366972	0.0379747	0.028169	0.0277778	0	0.027027	0.0240964	0.025974	0.0232558	0.0147059	0.0289855	0	0.0192308	0.0285714	0.0294118	0.0147059
HNSC_M1179	0.0347826	0.0305344	0.0434783	0.0198675	0.0193548	0.0322581	0.0423729	0.0277778	1	0.0298507	0.0285714	0.0322581	0.0305344	0.0273973	0.03	0.0294118	0.0333333	0.0291262	0.03	0.0331126	0.024	0.027972	0.031746	0.0309278	0.0285714	0.027027	0.0326797	0.0324324	0.047619	0.0323741	0.0186916	0.0272727
HNSC_M1450	0.0257732	0.0201342	0.0314961	0.0221519	0.0199203	0	0.0344828	0.0263158	1	0.0229008	0.0217391	0.0283688	0.025974	0.0268456	0.028169	0.0498812	0.0163934	0.0287356	0.0258065	0.0179641	0.0152672	0.0191083	0.0364583	0.018797	0.0190476	0.0218978	0.0202703	0.0210084	0.0322581	0.0333333	0.0175439	0.0208333
HNSC_M1452	0.04	0.0363636	0.037037	0.0416667	0.0487805	0.037037	0.025974	0	1	0.0227273	0.0307692	0.0227273	0.0227273	0.0217391	0.0392157	0.0416667	0.0350877	0	0.025974	0.025641	0.0246914	0.027027	0.0240964	0.0273973	0.0227273	0.0238095	0.0285714	0.0350877	0.0363636	0.0487805	0.0217391	0.0232558
HNSC_M1453	0.0296296	0.025	0.0292398	0.0211864	0.0208333	0.0240964	0.0361446	0.0246305	1	0.0218341	0.0247525	0.0127389	0.0189873	0.0252708	0.025974	0.0423163	0.0208333	0.0183486	0.030303	0.0193548	0.0268456	0.0175439	0.0242424	0.0260664	0.0231214	0.0184049	0.0184049	0.0159574	0.025974	0.0192308	0.0129032	0.0176471
HNSC_M1643	0.0276243	0.0182768	0.0350877	0.0243902	0.0197368	0	0.028	0.0225564	1	0.0254237	0.024	0.03125	0.0266667	0.0294118	0.03	0.0441176	0.0176471	0.0258621	0.0252101	0.0194805	0.0169492	0.0208333	0.0391061	0.0192308	0.0176991	0.0241935	0.0222222	0.0181818	0.036036	0.030303	0.0168067	0.0229008
HNSC_M1646	0.0241935	0.0275862	0.0434783	0.0206186	0.0216216	0.0205128	0.0300429	0.0181818	1	0.0275229	0.0248447	0.0211268	0.0222222	0.0185185	0.030303	0.049505	0.0225564	0.020202	0.0363636	0.0204082	0.0245902	0.020202	0.0272727	0.0245902	0.0206897	0.0181818	0.0185185	0.0227273	0.020202	0.019802	0.0227273	0.0234375
HNSC_M71	0.0375	0.0267857	0.0322581	0.0412371	0.0251572	0.0266667	0.0456432	0.0340909	1	0.0326087	0.0377358	0.0326087	0.0275862	0.0325203	0.0425532	0.03	0.0333333	0.0253165	0.0277778	0.0243902	0.030303	0.0458716	0.0247934	0.027027	0.0220994	0.0309278	0.0353982	0.021978	0.0384615	0.0254237	0.0177515	0.0224719
KICH_M133	0.0434783	0.0325733	0.040625	0.0215054	0	0.0183824	0.0383387	0.0248227	0.0224719	1	0.026738	0.030303	0.0255102	0.0371179	0.0433071	0.0384615	0.025	0.0413223	0.0305344	0.0267062	0.0333333	0.0352113	0.0332103	0.0408163	0.0231788	0.0184502	0.0250696	0.0137931	0.0315457	0.0488998	0.0247423	0.0236486
KICH_M135	0.0190476	0.019685	0.0245902	0.0210084	0.0214592	0	0.0190476	0.00980392	0.0194175	1	0.0223881	0.0265152	0.0165975	0.0223214	0.0243902	0.0184615	0.0169492	0.0276074	0.0215232	0.0237154	0.0147783	0.0240964	0.0185185	0.0254958	0.0186916	0.0248227	0	0.0229645	0.0241935	0.0263158	0.016	0.0233463
KICH_M136	0.0210526	0.023166	0.0251256	0.027668	0.0147059	0.0202899	0.0216216	0.0189573	0.024024	1	0.0223464	0.0168539	0.0237288	0.0264317	0.0326087	0.0421687	0.0214592	0.0245098	0.0205128	0.0275862	0.0163934	0.0273038	0.0358056	0.0285714	0.0140845	0.0185185	0.0196078	0.0154639	0.0239044	0.0258303	0.0381166	0.0269231
KICH_M1443	0.0416667	0.0396825	0.0272109	0.0299401	0.0212766	0.0243902	0.0366972	0.0346821	0.0328947	1	0.0460526	0.03125	0.0277778	0.0304878	0.019802	0.026087	0.0288462	0.0276243	0.0269231	0.0431034	0.0434783	0.0384615	0.0444444	0.0281124	0.0268817	0.0222222	0.0431655	0.028777	0.0246305	0.020202	0.0217391	0.0335196
KICH_M1463	0.0217391	0.0217391	0.028169	0.0222222	0.0253165	0.031746	0.0204082	0.0212766	0.0212766	1	0.0392157	0.0285714	0.0222222	0.0363636	0.025	0.0222222	0.0217391	0.0217391	0.0307692	0.0204082	0.0392157	0.0232558	0.0217391	0.021978	0.0212766	0	0.0434783	0.0408163	0.0350877	0.0217391	0	0.0220588
KICH_M15	0.0274262	0.0356394	0.0189076	0.0230415	0.020339	0.00501253	0.0258216	0.0268139	0.0222222	1	0.0176991	0.0256917	0.0164948	0.0321285	0.0333333	0.0292793	0.0184332	0.0281385	0.0144928	0.0167715	0.0125	0.0416667	0.0195759	0.0281426	0.0236052	0.010101	0.0228188	0.0185529	0.0169903	0.0271967	0.02	0.0247148
KICH_M179	0.0252101	0.0191083	0	0.0186916	0	0	0.0344828	0.0289855	0.0233645	1	0.0326797	0.0183486	0.0252101	0.0200803	0.0187668	0.0242424	0.0254237	0.0181818	0.0209424	0.0384615	0.0251572	0.0196078	0.0192308	0.0272109	0	0.0232558	0.0252101	0.0209205	0.024	0.0173913	0.0227273	0.0283019
KICH_M181	0.0238095	0	0.0258621	0.0194175	0.0183486	0.02	0.0229885	0.0212766	0.0201613	1	0.0291971	0.0217391	0.0241935	0.0227273	0.024	0.028169	0.03	0.0190476	0.029703	0.0215054	0.0227273	0.0205128	0.021978	0.0283019	0.0138067	0	0.0245902	0	0.0263158	0.0242424	0.0232558	0.021978
KICH_M182	0.0327869	0	0.0350877	0.0344828	0.0294118	0	0.0350877	0.0298507	0.0338983	1	0.0327869	0.0294118	0.0175439	0.0224719	0.0405405	0.0357143	0.0294118	0.0307692	0.0338983	0.0172414	0.0163934	0.0322581	0.031746	0.0294118	0	0	0.0294118	0.0169492	0.0319149	0.03125	0.0166667	0.0175439
KICH_M183	0.0327869	0.0416667	0.0384615	0.0327869	0.0210526	0.0163934	0	0	0.0285714	1	0.0265487	0.0227273	0.03	0.030303	0.0298507	0.0307692	0.0353982	0.036036	0.0294118	0.0394737	0	0.0163934	0.0246914	0.0266667	0.0192308	0.0289855	0.0298507	0.028777	0.0384615	0.032	0.0327869	0.0333333
KICH_M185	0.0454545	0.0344828	0.0416667	0.0434783	0.0416667	0.0322581	0.0454545	0.037037	0.0487805	1	0.0416667	0.0487805	0.0434783	0	0	0.0434783	0.0454545	0.047619	0.037037	0.0357143	0.0192308	0.047619	0.0416667	0.047619	0.0444444	0.0454545	0.0344828	0.047619	0.0434783	0.0384615	0.0416667	0.0454545
KICH_M189	0.026087	0.0222222	0.026738	0.0216216	0.0192926	0.0202703	0.025641	0.0260223	0.0227273	1	0.0486111	0.0261438	0	0.024	0.02	0.023622	0.0222222	0.0243902	0.0344828	0.0272109	0.0331126	0.0234375	0.021978	0.026087	0.0247934	0.0243902	0.0251572	0.0252101	0.025974	0.025	0.0217391	0.0257732
KICH_M190	0.0245902	0.0315789	0.0333333	0.0212766	0.0222222	0.0206186	0.030303	0.0220588	0.0330579	1	0.0290698	0.03	0.0206186	0.0357143	0.030303	0.0283019	0.0245902	0.0268456	0.0197368	0.0296296	0.0215827	0.0406504	0.028777	0.0380952	0.030303	0	0.0190476	0.0206897	0.0212766	0.025	0	0.026087
KICH_M191	0.0168539	0.0152284	0.0271318	0	0.0119048	0.0248963	0.0168539	0.0202429	0.015544	1	0.0318725	0.0264317	0.0215311	0.0187793	0.0228311	0.0201005	0.0157895	0.0176471	0.019802	0.0205761	0.011976	0.0186916	0.0239808	0.020339	0.018797	0	0.0260223	0.0159574	0.0208333	0.0201005	0.0116279	0.0120482
KICH_M21	0.0290557	0.0384025	0.0328283	0.018018	0.0253165	0.0255864	0.0277778	0.0200364	0.0345821	1	0.0321678	0.0398126	0.0345369	0.0265487	0.049459	0.0346908	0.0357853	0.0268199	0.0318066	0.0329949	0.0348101	0.0249377	0.039604	0.0256959	0.0329949	0.0243902	0.0327422	0.0230769	0.0286225	0.0336658	0.0282392	0.0293399
KICH_M217	0.0243902	0.0166667	0.025	0.0487805	0.0377358	0.025	0.025	0.0246914	0	1	0.025641	0.0238095	0.037037	0	0.0243902	0.025641	0.025	0.025641	0.025	0.025	0	0.0263158	0	0.025	0.0333333	0.0204082	0	0	0.025	0.0344828	0	0.025
KICH_M219	0.0227273	0.03	0.0340909	0.0240964	0.0265487	0	0.025	0	0.0243902	1	0.0243902	0.0315789	0.0247934	0.0238095	0.0280374	0.0291262	0.0384615	0.0253165	0.0315789	0.0238095	0.0222222	0.0288462	0.0238095	0.0331754	0.0210526	0.0192308	0.0280374	0	0.0214286	0.0240964	0.0258621	0.027027
KICH_M23	0.0152672	0.0186916	0.0205479	0.0141844	0.02	0.0151515	0.0175439	0.0222222	0.026455	1	0.0446429	0.0141844	0.033557	0.0197368	0.0151515	0.0166667	0.0220588	0.0206897	0.0210084	0.0153846	0.0143885	0.0217391	0.0148148	0.0277778	0.0194553	0.0218182	0.0147059	0.0201342	0.0153846	0.0151515	0.0301508	0.0149254
KICH_M236	0.0212766	0.03125	0.0326087	0.0287356	0.028169	0	0.0315789	0.0361446	0.037037	1	0.0253165	0.032967	0.0294118	0.0252101	0.025641	0.0151515	0.0229885	0.0294118	0.028169	0.0289855	0.028169	0.015625	0.015625	0.0222222	0.0184332	0.0151515	0.0277778	0	0.034188	0.015625	0.015625	0.03125
KICH_M237	0.0197368	0.0245399	0.0185185	0.0205128	0.025974	0.0185185	0.0248756	0.0213904	0.0181818	1	0.0467836	0.0245902	0.0193966	0.017094	0.0234742	0.027027	0.0191083	0.025641	0.0285714	0.0194805	0.0226629	0.0200803	0.0216216	0.0191388	0.0190476	0.0128205	0.0212766	0	0.0266667	0.0134228	0	0.02
KICH_M247	0.0374332	0.047619	0.0322581	0.022508	0	0.0210526	0.0378378	0.0424837	0.0164609	1	0.0396476	0.0347826	0.025	0.037234	0.0376344	0.037234	0.0310078	0.0378378	0.0368664	0.0374332	0.015	0.0360825	0.0264026	0.0265957	0.0164609	0.0159151	0.0378378	0.0329218	0.0104167	0.0439024	0.0237069	0.0181818
KICH_M26	0.0299401	0.03125	0.0247525	0.017341	0.0169492	0	0.0284091	0.0121951	0.0268817	1	0.0192308	0.018315	0.0255319	0.0245399	0.0240964	0.032967	0.025974	0.0229885	0.0227273	0.0207469	0.0126582	0.0232558	0.0176471	0.0244755	0.0245399	0.0180723	0.0220994	0	0.0186916	0.0200803	0.0242991	0.019802
KICH_M272	0.0204082	0.038961	0.034188	0.0245902	0	0	0.0181818	0.0188679	0.0194805	1	0.0347826	0.0283688	0.0373134	0.0243902	0.026087	0.0233918	0.0403226	0.0253165	0.0267857	0.0310078	0.0186916	0.021097	0.0192308	0.0322581	0.0234375	0.0175439	0.0243902	0.0258621	0.0222222	0.0190476	0.0181818	0.0188679
KICH_M291	0.0315789	0.0337079	0.0326087	0.037037	0.0232558	0.0224719	0.0322581	0.0232558	0.0238095	1	0.0333333	0.027027	0.0235294	0.0238095	0.0412371	0.0235294	0.0224719	0.0227273	0.0230769	0.0263158	0.0232558	0.026087	0.0272727	0.0232558	0.0232558	0	0.0240964	0.0285714	0.0291262	0.0240964	0.0240964	0
KICH_M295	0.0352941	0.0267857	0.0232558	0.0217391	0.0208333	0.0173913	0.0232558	0.0212766	0.0223881	1	0.0382166	0.0294118	0.0240964	0.0285714	0.0267857	0.0294118	0.0267857	0.0212766	0	0.0196078	0	0	0.0310078	0.0315789	0.0225564	0.0280374	0.0223881	0.0206186	0.0275229	0.0243902	0	0.0225989
KICH_M30	0.036855	0.0343915	0.0246575	0.019802	0.0114613	0.00909091	0.0275229	0.0218182	0.0257453	1	0.0390738	0.0305206	0.0248366	0.0278834	0.0248869	0.0282776	0.0307692	0.027088	0.0238095	0.0200893	0.032	0.0244989	0.0210728	0.0215633	0.0134771	0.0147783	0.0286299	0.0268949	0.0178571	0.0245902	0.0234192	0.0159574
KICH_M31	0.0235294	0.0253485	0.0182149	0.0144928	0.018797	0.0189036	0.0291439	0.0148305	0.0236686	1	0.040293	0.0310734	0.0267023	0.0152091	0.0210674	0.0264672	0.0142566	0.0176678	0.0333333	0.0152174	0.0269231	0.0277008	0.0301954	0.0191638	0.0150094	0.0124224	0.0284168	0.0157171	0.0272109	0.0111359	0.00677201	0.0139442
KICH_M311	0.047619	0.0416667	0.0434783	0.00914634	0	0.0454545	0.0416667	0.030303	0.0327869	1	0.0294118	0	0.037037	0.0434783	0.0454545	0.04	0.0416667	0	0.0454545	0.0454545	0	0.0357143	0.047619	0.0454545	0	0.0444444	0	0.0434783	0.0416667	0.0416667	0	0.047619
KICH_M36	0.0268817	0.0360825	0.0253165	0.0235294	0	0.0209205	0.0201005	0.0219178	0.0242424	1	0.0282486	0.0307692	0.0285714	0.0245399	0.0246914	0.0236967	0.030303	0.0252525	0.0238095	0.0235294	0.0135135	0.0216606	0.0205224	0.0255102	0.020202	0.0129032	0.0244444	0.0229358	0.0273973	0.0209424	0.0211946	0.0137931
KICH_M4	0.0263158	0.037037	0.0248447	0.0232558	0.0232558	0.0232558	0.0405405	0.0266667	0.0227273	1	0.0487805	0.0232558	0.0425532	0.0227273	0.030303	0.0298507	0.0465116	0.0408163	0.0434783	0.0273973	0	0.0238095	0.0232558	0.0434783	0.0229885	0.0243902	0.0307692	0.0333333	0.0227273	0.0243902	0	0.0238095
KICH_M41	0.0285714	0.0319149	0.0294118	0.032967	0.0208333	0.020202	0.0298507	0.0215827	0.0212766	1	0.03	0.0247934	0.0230769	0.0212766	0.0373832	0.0210526	0.020202	0.0272727	0.0214286	0.0285714	0.0208333	0.024	0.025	0.0230769	0.0208333	0	0.0222222	0.026087	0.0265487	0.0215054	0.0215054	0
KICH_M47	0.04	0.0416667	0.0350877	0.031746	0	0.0232558	0.0204082	0.0338983	0.0243902	1	0.0238095	0.0307692	0.0363636	0.031746	0.0338983	0.0408163	0.0232558	0.0227273	0.0238095	0.0235294	0.0227273	0.025974	0.0289855	0.0408163	0.0377358	0.0465116	0	0.0227273	0.0408163	0.0322581	0	0.0298507
KICH_M607	0.0357143	0.023622	0.0378788	0.032967	0	0.0212766	0.021978	0.0238095	0.026087	1	0.034965	0.0357143	0.0217391	0.0253165	0.0241935	0.0243902	0	0.0449438	0.0253165	0.0245902	0	0.025974	0.0265487	0	0.0224719	0.0310078	0	0.0253165	0.047619	0.0384615	0	0.0265487
KICH_M608	0.0215827	0.0314465	0.0402685	0.0277778	0.0243902	0	0.0241935	0.0184049	0.0275229	1	0.034965	0.0241935	0.0280374	0.0387597	0.0363636	0.0228571	0.0234375	0.0440252	0.0242424	0.0272727	0.0277778	0.0235849	0.0265487	0.030888	0.025	0.021164	0	0.0206718	0.0200803	0.0413223	0.0192308	0.0350877
KICH_M612	0.031746	0.0217391	0.0224719	0.0333333	0.0217391	0.0217391	0.0217391	0.0217391	0.0217391	1	0.0217391	0.0217391	0.030303	0.0217391	0.0447761	0.0392157	0.0350877	0.025641	0	0.0444444	0.0217391	0.0434783	0.0208333	0.0322581	0.0217391	0.0217391	0	0.0327869	0.0212766	0.0434783	0.0434783	0.0217391
KICH_M710	0.0416667	0.0263158	0.027027	0.0357143	0.0267857	0.0253165	0.030303	0.0253165	0.0283019	1	0.0253165	0.032967	0.0333333	0.0267857	0.0289855	0.0298507	0.0416667	0.0277778	0.0273973	0.0212766	0.0263158	0.0238095	0.0206897	0.0179372	0.0350877	0.0210526	0.0380952	0	0.0246914	0.0285714	0.0307692	0.0307692
KICH_M738	0.0366667	0.0392927	0.0273973	0.0300546	0.0218579	0.0253968	0.0307263	0.0327869	0.0343137	1	0.0403587	0.0306407	0.0278884	0.0308642	0.0361446	0.0259067	0.022508	0.0277778	0.0354906	0.0322581	0.0357143	0.033557	0.025	0.0287356	0.0391304	0	0.0331754	0.0318725	0.0318949	0.0209302	0.0277778	0.0238095
KICH_M758	0.0277778	0	0.0273973	0	0.0206186	0.0227273	0.0266667	0.0243902	0.0204082	1	0.032	0.025	0.0267857	0.025974	0.0222222	0.0307692	0.0224719	0.0162338	0.025	0	0.0263158	0.0206186	0.0253165	0.0319149	0	0	0.0272727	0	0.0280899	0.0277778	0.027027	0.0246914
KICH_M762	0.03125	0.0277778	0.0175439	0.02	0.0238095	0.0266667	0.0196078	0.0229885	0.0338983	1	0.0298507	0.0204082	0	0.0363636	0.0333333	0.037037	0.0384615	0.0196078	0.0267857	0.0363636	0	0.02	0.0285714	0.0294118	0.0215054	0.0151515	0.0357143	0.0232558	0.0384615	0.0350877	0	0.0384615
KICH_M768	0.0213904	0.0285714	0.03	0	0	0.0291262	0.0222222	0.0163934	0	1	0.0430108	0	0.0220994	0.019802	0.0305344	0.032	0.0196078	0.0212766	0	0	0.0280374	0.0186916	0	0	0.025	0	0.0196078	0.0190476	0.0176991	0.032	0.0245399	0
KICH_M77	0.0204082	0.0196078	0.0425532	0.0188679	0	0.03125	0.028169	0.0307692	0.02	1	0.0377358	0.0289855	0.0350877	0.0204082	0.0338983	0.0188679	0.0208333	0.02	0.037037	0.0208333	0.038961	0.0338983	0.0294118	0.0243902	0.0191083	0.0175439	0	0.0289855	0.0208333	0.027027	0	0.0338983
KICH_M770	0.0215054	0.0217391	0.025641	0.0245399	0.0204082	0.0238095	0.0208333	0.027027	0.0201005	1	0.0487805	0.0232558	0	0.0285714	0.0234375	0.0214592	0.0224719	0.029703	0.032967	0.032	0.0238095	0.0214286	0.026087	0.0322581	0.0210526	0.029703	0.0217391	0.0309278	0.030303	0.0216216	0	0.0243902
KICH_M778	0.0208333	0.0184049	0.0201342	0.0138889	0.0149254	0.0240385	0.0179641	0.0234742	0	1	0.0321101	0.0273973	0.0143885	0.0223464	0.0228571	0.0145985	0	0.0220588	0.0201729	0.0239234	0.0207254	0.0222222	0.0234375	0.017316	0.0187793	0.0191083	0.0204082	0.0190476	0.0253165	0.0242424	0	0.0145985
KICH_M808	0.04	0	0.0416667	0.0357143	0.015625	0.04	0.0344828	0.0357143	0.0357143	1	0	0.0384615	0.0243902	0	0.0344828	0.0384615	0.04	0.0416667	0.0384615	0.0357143	0.0294118	0.04	0.0384615	0.04	0.0379747	0.0416667	0	0.0333333	0.04	0.0322581	0.0333333	0.04
KICH_M809	0.0384615	0.0357143	0.0416667	0.037037	0	0	0.0434783	0.037037	0.027027	1	0.04	0.0434783	0.0434783	0.0384615	0.04	0.0434783	0.0416667	0.0416667	0.037037	0.0434783	0	0.0416667	0.0384615	0.0416667	0	0	0.0344828	0.0240964	0.0416667	0.037037	0.0416667	0.0434783
KICH_M852	0.025974	0.0425532	0.0434783	0.0318471	0.037037	0	0.0384615	0	0.046875	1	0.0246914	0.0408163	0.02	0.0289855	0.0327869	0.0212766	0.0212766	0.0363636	0.037037	0.0384615	0.037037	0.0212766	0.0212766	0.0273973	0	0.0204082	0.02	0	0.0405405	0.0212766	0.0212766	0.0416667
KICH_M860	0.0377358	0.0333333	0.0298507	0.0444444	0.020979	0.0204082	0.0392157	0	0.025974	1	0.0454545	0.0491803	0.0408163	0.0483871	0.0285714	0.04	0.0392157	0.028169	0.0204082	0.0253165	0.0350877	0.027027	0.0273973	0.0363636	0.0322581	0.0291262	0.0181818	0.0338983	0	0.037037	0	0.0322581
KICH_M874	0.033557	0.0404624	0.027027	0.0239521	0	0.0198675	0.0340136	0.0371747	0.02	1	0.0481283	0.0356295	0.0232558	0.0333333	0.0337838	0.0333333	0.0257143	0.0340136	0.0277778	0.033557	0.013245	0.0320513	0.0304183	0.0263158	0.01875	0.0126582	0.0340136	0.0260417	0.02	0.0357143	0.0211268	0.0133333
KIRC_M223	0.0359712	0.0420561	0.037037	0.0225564	0.0333333	0.0352113	0.0344828	0.0208333	0.0431655	0.0299065	1	0.0218978	0.0217391	0.0462633	0.031746	0.026178	0.0294118	0.0243902	0.0291971	0.0265306	0.0278884	0.0377358	0.039604	0.021164	0.028169	0.0316456	0.038835	0.029703	0.0232558	0.0228571	0.0229358	0.0289855
KIRC_M239	0.0357143	0.0384615	0.0333333	0.0377358	0.037037	0.0344828	0.0322581	0	0.030303	0.037037	1	0.0344828	0.025	0.0357143	0.0294118	0.037037	0.037037	0.037037	0	0.0162602	0.0408163	0.037037	0.0344828	0.0357143	0	0.0333333	0.037037	0.0357143	0.0322581	0.0344828	0.0384615	0.0333333
KIRC_M252	0.0253165	0.03	0.0277778	0.0307692	0.0185185	0	0.0263158	0.0307692	0.034188	0.0322581	1	0.0357143	0.0263158	0.0350877	0.0422535	0.037037	0.0338983	0.0298507	0.0491803	0.0181818	0.0363636	0.0126183	0.030303	0.0357143	0.027027	0	0.0181818	0.029703	0.0338983	0.025	0	0.0283688
KIRC_M254	0.0230769	0.0325203	0.025641	0	0.03125	0.0246914	0.021978	0.0214286	0.0246914	0.0185185	1	0.0378788	0	0.0224719	0.0326087	0.0254237	0.027027	0.031746	0.0246914	0.0273973	0.030303	0.015873	0.028169	0.0289855	0.0229885	0.0306122	0.0246914	0	0	0.0153846	0.0307692	0.0263158
KIRC_M36	0.023622	0.024	0.0255102	0.025641	0.0324675	0.0238095	0.0224719	0.0243902	0.025974	0.0277778	1	0.046729	0.0246914	0.021978	0.0339806	0.0255319	0.0225564	0.040404	0.0336538	0.0235294	0.0252101	0.016129	0.0348259	0.0225564	0.0155039	0.03125	0.0220588	0.0209205	0.0437956	0.0320856	0.0200669	0.0287356
KIRC_M360	0.0245399	0.038961	0.0267857	0.0410959	0.0294118	0.0263158	0.0294118	0.0285714	0.0322581	0.0232558	1	0.0434783	0.0294118	0.0337079	0.0487805	0.0319149	0.030303	0.0365854	0.0144928	0.0294118	0.0238095	0.0294118	0.025	0.0365854	0.0277778	0.0246914	0.0277778	0.0285714	0.028169	0.0361446	0.0289855	0.0322581
KIRC_M380	0.0444444	0.0350877	0.037037	0.0208333	0.0208333	0.020979	0.0357143	0.0434783	0.0238095	0.0392157	1	0.0337079	0.0384615	0.0243902	0.0425532	0.0422535	0.0425532	0.0357143	0.0447761	0.0434783	0.0327869	0.0344828	0.0338983	0.0217391	0.04	0.0185185	0.037037	0.03	0.0338983	0	0.0217391	0.0416667
KIRC_M388	0.0344828	0.021164	0.0243902	0.0240964	0.0217391	0.0123457	0.0326087	0	0.0322581	0.0411765	1	0.0206897	0.0350877	0.0207254	0.0229885	0.0272727	0.040404	0.0243902	0.029703	0.0227273	0.0240964	0.0352941	0.0222222	0.0322581	0.0159046	0.025	0.0225989	0.0229885	0.021978	0.0246914	0.0235294	0.0229885
KIRC_M391	0.03125	0.027027	0.030303	0.0298507	0	0	0.0338983	0.0357143	0.0307692	0.025641	1	0.0169492	0.0296296	0.0405405	0.0333333	0.0357143	0.031746	0.0322581	0.0333333	0.0240964	0.0222222	0.0263158	0.0365854	0.0306122	0.0307692	0.0307692	0.0322581	0.028169	0.0273973	0.0215054	0.0338983	0.0357143
KIRC_M41	0.0254237	0.0180995	0.0263158	0.028777	0.03125	0.0258621	0.0275229	0.0190476	0.023622	0.0258621	1	0.0434783	0.0319149	0.039604	0.0223881	0.0217391	0.0222222	0.0291262	0.0348837	0.0227273	0.0272727	0.0224719	0.0222222	0.0217391	0.0210526	0.0362319	0.0228571	0.0217391	0.0230769	0.0331126	0.0241935	0.0212766
KIRC_M416	0.0434783	0.0434783	0.04	0	0.0434783	0.0285714	0.0357143	0.0384615	0.0357143	0.0434783	1	0.0465116	0.0384615	0.0416667	0.0416667	0.04	0.0434783	0.04	0.0263158	0	0.0434783	0.0384615	0.0416667	0.04	0.0434783	0.0357143	0.0333333	0.0416667	0.0416667	0.0416667	0.0333333	0.0434783
KIRC_M45	0.0229885	0.0277778	0.025	0.0416667	0.016129	0	0.0307692	0.0337079	0.032	0.0285714	1	0.0326087	0.0238095	0.0307692	0.0379747	0.0337079	0.0298507	0.0405405	0.0434783	0.015873	0.031746	0.030303	0.027027	0.03125	0.0243902	0.0307692	0.015873	0.0275229	0.0298507	0.0344828	0.0110906	0.0268456
KIRC_M453	0.0421053	0.0471698	0.0379747	0.0315789	0.0422535	0.025641	0.0363636	0.0379747	0.0413793	0.0361446	1	0.0472441	0.037037	0.0493827	0.03	0.0348837	0.027027	0.0361446	0.04	0.0277778	0.025	0.03125	0.0277778	0.0340909	0.0266667	0.0309278	0.0352941	0.0319149	0.037037	0.04	0.0215054	0.0253165
KIRC_M46	0.0299145	0.0365854	0.0206897	0	0.0186916	0.0280374	0.0223214	0.019084	0.0212766	0.0197368	1	0.0459184	0.0192308	0.0185185	0.0222222	0.025	0.0214286	0.0188679	0.0242424	0.0208333	0.0258621	0.0180723	0.0175439	0.0190476	0.0185185	0.0212766	0.0165746	0.0294118	0.0204082	0.0215054	0.0185185	0
KIRC_M739	0	0.0377358	0.0384615	0.0483871	0.0384615	0.0344828	0.0327869	0.0307692	0.0344828	0.025	1	0.0491803	0.03125	0.0416667	0.0408163	0.0273973	0.037037	0.0333333	0.0344828	0.0357143	0.0408163	0.0273973	0.023622	0.0350877	0	0.04	0.0243902	0.0285714	0.0392157	0.0243902	0.0240964	0.0266667
KIRC_M785	0.0192308	0.0408163	0.0294118	0.0253165	0.0380952	0.0322581	0.0377358	0.0350877	0.0217391	0.0384615	1	0.0266667	0.0307692	0.0336134	0.0357143	0.0425532	0.0363636	0.04	0.0375	0.0298507	0.030303	0.0253165	0.0416667	0.0344828	0.0425532	0.037037	0.0217391	0.0363636	0.0384615	0.0277778	0.0434783	0.0344828
KIRC_M793	0.0291262	0.0434783	0.0446429	0.0416667	0.0338983	0.0344828	0.0408163	0.0392157	0.0285714	0.0263158	1	0.021978	0.025974	0.0208333	0.0246914	0.0263158	0.0357143	0.0408163	0.0344828	0.0222222	0.0310078	0.0232558	0.027027	0.0208333	0.039604	0	0.0375	0.0350877	0.0238095	0.028169	0.0243902	0.0327869
KIRC_M83	0.0333333	0.025641	0.0266667	0.0277778	0.0220994	0	0.03	0.0298507	0.0289855	0.0277778	1	0.032967	0.0273973	0.0294118	0.0294118	0.0421053	0.0294118	0.027027	0.0421053	0.030303	0.0243902	0.0285714	0.025	0.0235294	0.0375	0.0273973	0.03125	0.025	0.027027	0.0246914	0.0149254	0.0315789
KIRC_M86	0.0314465	0.0278638	0.0298507	0.0290698	0.0151515	0	0.0384615	0.0241379	0.0344828	0.0446429	1	0.0170316	0.0318725	0.0225	0.025	0.0247934	0.028777	0.0342466	0.0383481	0.0243902	0.0243056	0.024	0.0238095	0.0287081	0.0241636	0.0248963	0.0241546	0.0217391	0	0.0216216	0.021978	0.0239521
KIRC_M961	0.0487805	0.0377358	0.0232558	0.0227273	0.0191083	0.0215827	0.0384615	0.047619	0.0298507	0.0425532	1	0.0352941	0.0416667	0.025641	0.0465116	0.0447761	0.0465116	0.0384615	0.03125	0.047619	0.0350877	0.037037	0.0363636	0.0238095	0.0434783	0.02	0.04	0.03125	0.0363636	0	0.0238095	0.0454545
KIRC_M98	0.0361446	0.0410959	0.028169	0.030303	0.0277778	0.0307692	0.0307692	0.0175439	0.028169	0.047619	1	0.0322581	0.0289855	0.0283688	0.031746	0.0348837	0.0483871	0.03	0.028777	0.038961	0.0410959	0.030303	0.046875	0.0153846	0.03125	0.025	0.0147059	0.0384615	0.0394737	0	0	0.03125
KIRP_M1109	0.0209205	0.0268657	0.0218069	0.0248756	0.0172786	0.0262172	0.0204918	0.0213777	0.0248869	0.021097	0.0252708	1	0.0246479	0.0297872	0.0214133	0.0302419	0.0280112	0.0405405	0.0243243	0.0301724	0.025974	0.0198238	0.0234742	0.0206186	0.0212766	0.0202703	0.0272	0.0193237	0.0302013	0.0181818	0.0296296	0.0187166
KIRP_M1113	0.0245902	0.0384615	0.0310078	0.025641	0.0253165	0.0247934	0.032967	0.025	0.037037	0.025974	0.0266667	1	0.0375	0.0357143	0.0423729	0.0425532	0.03	0.0361446	0.0246914	0.0235294	0.0227273	0.0232558	0.0444444	0.0352941	0.0403226	0.03	0.0340909	0.0210526	0.0481928	0.0337079	0.025	0.0275229
KIRP_M1375	0.0235294	0.0272109	0.0250896	0.0314465	0.0196078	0.029703	0.0213904	0.0166667	0.0223881	0.0231481	0.0297872	1	0.0246154	0.0263158	0.020339	0.0240175	0.028481	0.0271739	0.0243161	0.0314136	0.0263158	0.0230415	0.0196078	0.0213523	0.0201613	0.0218579	0.0282486	0.0215054	0.0311284	0.0224719	0.0234899	0.0190476
KIRP_M1473	0.0222222	0.026616	0.0241935	0.0393701	0.0205479	0.025641	0.0258065	0.0202703	0.0215633	0.0271739	0.0294118	1	0.0239521	0.0299145	0.0228137	0.0220994	0.0280702	0.0261438	0.0210526	0.0207469	0.0316456	0.0215054	0.0247934	0.0182927	0.0217391	0.0166667	0.0273973	0.0205279	0.0355556	0.0204082	0.0193548	0.020979
KIRP_M250	0.0416667	0.0434783	0.0444444	0.0416667	0.0240964	0.0344828	0.0384615	0	0.0333333	0.0357143	0.0322581	1	0	0.0454545	0.037037	0.0454545	0.0434783	0.0416667	0.0454545	0.04	0.0238095	0	0.0212766	0.03125	0	0	0.0434783	0.0416667	0.0434783	0.0454545	0.04	0.0454545
KIRP_M518	0.0416667	0.0240964	0.029703	0	0.0461538	0.0204082	0.025	0.0340909	0.0357143	0.0441176	0.04	1	0.0208333	0.0204082	0.0319149	0.0375	0.0266667	0.038961	0.046875	0.025974	0.0243902	0.030303	0.0441176	0.0285714	0.0314961	0.0326087	0.0192308	0.0229885	0.0291262	0.0238095	0.0243902	0.0326087
KIRP_M527	0.0238095	0.0277778	0.0284091	0.0217391	0.0352941	0	0.0212766	0.0393701	0.0224215	0.0416667	0.047619	1	0.0222222	0.0245399	0.021978	0.0225989	0.0373832	0.0243902	0.0272727	0.023622	0.0275862	0.0265487	0.0210526	0	0.0217391	0.026087	0.0222222	0.0227273	0	0.0210526	0.0222222	0
KIRP_M90	0.0229885	0.031746	0.0263158	0.0243902	0.0229885	0.0253165	0	0.0352941	0.025641	0.0273973	0.0285714	1	0.0246914	0.0319149	0.025641	0.0247934	0.0215054	0.0273973	0.0384615	0.0136986	0.028169	0.025641	0.0208333	0.0227273	0.0208333	0.0352941	0.025641	0.028169	0.0240964	0.025974	0	0.0273973
LGG_M1061	0.0263158	0.037037	0.0185185	0.0238095	0	0.0338983	0.0322581	0.037037	0.020202	0.0181818	0.0377358	0.0327869	1	0.0181818	0.0350877	0.0289855	0.0377358	0.0246914	0.0315789	0.0315789	0.0377358	0.0188679	0.0181818	0.0461538	0.0185185	0.0350877	0.0363636	0.0283019	0.0377358	0.0350877	0.0379747	0.0273973
LGG_M1090	0.0222222	0.0396825	0.0375	0.0365854	0.0163934	0.025974	0.0416667	0.0322581	0.0483871	0.0294118	0.0338983	0.0240964	1	0.0422535	0.0375	0.0379747	0.0447761	0.0405405	0.0229885	0.0422535	0	0.0381679	0.0434783	0.0344828	0.028169	0.0285714	0.0169492	0.0379747	0	0.0333333	0.0307692	0
LGG_M1112	0.0444444	0.0222222	0.0350877	0.031746	0.0238095	0.0238095	0.0232558	0.047619	0.0465116	0.0232558	0.025974	0.0232558	1	0.034188	0.0238095	0.0465116	0.0238095	0.0357143	0.0392157	0.0444444	0.0212766	0.0338983	0.03125	0.0327869	0.0232558	0.0238095	0.0238095	0	0	0.0298507	0.037037	0.0222222
LGG_M1161	0.0465116	0.027027	0.0238095	0.0243902	0.037037	0.027027	0.025641	0.0444444	0.0327869	0.0253165	0.0243902	0.0263158	1	0.0263158	0.0238095	0.025	0.0425532	0.0232558	0.0322581	0.025641	0.0357143	0.0263158	0.0350877	0.0263158	0	0	0.0263158	0	0.0263158	0.0252101	0.0223881	0.0181818
LGG_M1162	0.0178571	0.0266667	0.0352941	0.0340909	0.0246914	0.0178571	0.0210526	0.0263158	0.0166667	0.0266667	0.03125	0	1	0.027027	0.0315789	0.0454545	0.0344828	0.0350877	0.0175439	0.0243902	0.0333333	0.0298507	0.026087	0.0363636	0.0283019	0.0166667	0.03125	0.030303	0.0363636	0.0327869	0.0307692	0
LGG_M1186	0.0294118	0.0361446	0.0215054	0.03125	0.03	0.0338983	0	0.0263158	0	0.028169	0.0288462	0.0322581	1	0.0307692	0.0285714	0.028169	0.03125	0.028169	0.0289855	0.0204082	0.0379747	0.0229885	0.0247934	0.0240964	0.015873	0.03125	0.020202	0.0224719	0.0273973	0.0416667	0.0151515	0.028169
LGG_M1194	0.0416667	0.034188	0.0392157	0.0491803	0.0344828	0	0.0357143	0.0344828	0.04	0.0252101	0.0416667	0.0238095	1	0.047619	0.0375	0.031746	0.0327869	0.0487805	0.0384615	0.0363636	0.025	0.0338983	0.0465116	0.0227273	0	0.0277778	0.0408163	0.030303	0.0487805	0.0238095	0.0272727	0.0416667
LGG_M1207	0.019802	0.026087	0.0222222	0.0190476	0	0.0254777	0.0258621	0.038961	0.020979	0.0181818	0.0241935	0.0194175	1	0.0178571	0.0192308	0.019802	0.0223881	0.0194175	0.0224215	0.0285714	0.0214286	0.0294118	0.025641	0.0178571	0.0190476	0.019802	0	0	0.0186916	0	0.028169	0.0197368
LGG_M1245	0.0203046	0.026738	0.0263158	0	0	0	0.0141844	0.0372093	0.0176471	0.0189873	0.0141844	0.027668	1	0.0188679	0.0240964	0.025	0.0185185	0.030837	0.0338164	0.0316456	0.021978	0.0215054	0.0206897	0.0144928	0.0194805	0	0.0143885	0.0225989	0.0186335	0.0166667	0.0208333	0.0143885
LGG_M1250	0.0229008	0.0277778	0.0225564	0.0227273	0.0190476	0.0224719	0.021978	0.0357143	0.0229008	0	0.0306122	0.0210526	1	0.0245902	0.0272374	0.0420168	0.0222222	0.0217391	0.0396825	0.0326087	0.0227273	0.021978	0.0222222	0.0254237	0.0204082	0.0380952	0	0.0229885	0.0243902	0.0444444	0.0344828	0.0288462
LGG_M1271	0.0232558	0.0310078	0.026087	0.0224719	0.0210526	0.0266667	0.0294118	0.0480769	0.0181818	0.0204082	0.0277778	0.0380952	1	0.0229885	0.0217391	0.0229885	0.0227273	0.0229008	0.0179641	0.0206186	0	0.0416667	0.0454545	0.020202	0.0288462	0.029703	0.025641	0.034188	0.0309278	0.0217391	0.025	0.0222222
LGG_M128	0.0234375	0.0229885	0.0255102	0.0196078	0.0227273	0.030303	0.0229885	0.0454545	0.0235294	0.0235294	0.0384615	0.0232558	1	0.0310559	0.0275229	0.0225806	0.0215054	0.0235294	0.0232558	0.0251572	0.027027	0.0263158	0.0326087	0	0.0224719	0	0.0227273	0.0254237	0.0220588	0.0210526	0.0291262	0.0215054
LGG_M129	0.0390625	0.0247934	0.0230415	0.0238095	0.0353535	0.0357143	0.0361011	0.0457143	0.0230179	0.031746	0.0324324	0.0247934	1	0.0250896	0.0297619	0.038806	0.0434783	0.0313901	0.0344828	0.0283688	0.025	0.0280899	0.0247934	0.0288066	0.0418848	0.0216216	0.0247525	0.0394089	0.0338983	0.0258621	0.035461	0.03125
LGG_M135	0.016129	0.0277778	0.0248447	0.0289855	0.0163551	0.0327869	0.0163934	0.0481928	0.0227273	0.0326797	0.0425532	0.0381356	1	0.0241379	0.0295858	0.0320513	0.0333333	0.026087	0.0377358	0.0280374	0.0408163	0.0266667	0.037594	0.026178	0.0258621	0.0240964	0.0348837	0.014245	0.0176991	0.04	0.015625	0.0327869
LGG_M1436	0.0192308	0.0322581	0.0363636	0.0298507	0	0.0277778	0.031746	0.0192308	0.0350877	0.0327869	0.0194175	0.030303	1	0.0285714	0.0441176	0.0172414	0.0192308	0.0350877	0.0277778	0.0361446	0.0363636	0.037037	0.025	0	0	0.0203046	0.025	0.0196078	0	0	0.0357143	0
LGG_M1477	0.0246914	0.0327869	0.027027	0	0	0.0206897	0.0188679	0.0429448	0.019802	0.0243902	0.0197368	0.0230769	1	0.0241935	0.0267857	0.0215827	0	0.0245902	0.0346821	0.0322581	0.021978	0.0204082	0.0229008	0.0194175	0.0252101	0	0.0183486	0.028169	0.0238095	0.0206897	0.0202703	0.0192308
LGG_M17	0.0169492	0.0289855	0.0314136	0.0215054	0.0196507	0.0215054	0.0294118	0.0438596	0.0263158	0.0292208	0.0355731	0.045283	1	0.0249221	0.03	0.0265957	0.0248963	0.0344828	0.0333333	0.0278884	0.0372671	0.0210526	0.030303	0.027027	0.0272109	0.0243902	0.0254237	0.0183727	0.021148	0.0280374	0.0190114	0.0296296
LGG_M171	0.0288462	0.0191083	0.0178571	0.0175439	0.0418848	0.0168539	0.0218182	0.0358056	0.0291971	0.0218579	0.0177665	0.0144928	1	0.0143885	0.0225989	0.0201342	0.0272109	0.0221239	0.0184049	0.0196078	0.013986	0.0252101	0.0225989	0.0243902	0.0198675	0.0198675	0.0193548	0.0143885	0.0212766	0.0275229	0.0330579	0.025641
LGG_M178	0.0243902	0.0196078	0.0183486	0.0238095	0.0175439	0	0.023622	0.0462428	0.0194175	0.0232558	0.0211268	0.0194175	1	0.0327869	0.0197368	0.0238095	0.0190476	0.0258065	0.018018	0.0300752	0.0173913	0	0.0291262	0.0196078	0.0194175	0.0190476	0.0216606	0.0229008	0.0241935	0.0205128	0.0357143	0.0188679
LGG_M179	0.0215827	0.0209424	0.00813008	0.0104712	0.0175879	0.0143885	0.0183767	0.0472028	0.0330882	0.0134771	0.0258152	0.0185185	1	0.0146699	0.0140187	0.0128866	0.0216963	0.0247117	0.0254545	0.0138889	0.0280992	0.029549	0.0246679	0.0230769	0.0129534	0.013369	0.0203562	0.0130548	0.027027	0.031457	0.0194932	0.0193133
LGG_M187	0.03125	0.0233161	0.027972	0.0235849	0.0322581	0.0162602	0.0169014	0.035461	0.0261438	0.0232558	0	0.0231023	1	0.0169492	0.0179641	0.0163043	0.01875	0.0149254	0.0243902	0.0190476	0.0294118	0.0193548	0.0273438	0	0.0162602	0	0.0227273	0.0186567	0.0214286	0.0194175	0.0204082	0.0289855
LGG_M188	0.025974	0.0241935	0.0282486	0.0259067	0.0230263	0	0.027027	0.0359712	0.0238095	0.0220588	0.029661	0.032967	1	0.023622	0.03125	0.0225564	0.0163934	0.0230769	0.0273224	0.0297297	0.025641	0.0273973	0.0236686	0.0327869	0.0234375	0.0239521	0.0388889	0.0346821	0.0372671	0.0337838	0.0239234	0.0227273
LGG_M190	0.027027	0.0190476	0.0285714	0.03	0.019802	0	0.0258621	0.0465116	0.0280702	0.03125	0.0296296	0.0420168	1	0.0384615	0.0307692	0.0243902	0.019802	0.0291971	0.0212766	0.0178571	0	0.019802	0.0263158	0.0296296	0.0291262	0.0238095	0.027027	0	0	0.0362319	0.0275229	0.019802
LGG_M191	0.037037	0.025	0.028169	0.037037	0.0172414	0.027027	0.027027	0.028169	0.0285714	0.0235294	0.0338983	0.0294118	1	0.0266667	0.0277778	0.027027	0.0273973	0.028169	0.0263158	0.0243902	0.0181818	0.025	0.03	0.025974	0	0.0394737	0.0232558	0	0.0227273	0.028169	0.0263158	0.0138889
LGG_M195	0.025	0.0315789	0.03125	0.025	0.032967	0.0204082	0.0210526	0.0357143	0.0275862	0	0.03	0.0240964	1	0.0340909	0.0232558	0.0277778	0.025641	0.0254777	0.0258621	0.025641	0.0243902	0.0272727	0.025974	0.0128205	0.0222222	0.0243902	0.0253165	0.0208333	0.0347826	0.0212766	0.0246914	0.0212766
LGG_M199	0.0175439	0.0327869	0.0350877	0.0277778	0	0.0222222	0.0175439	0.0350877	0.031746	0.0379747	0.0357143	0.0338983	1	0.0327869	0.0357143	0.030303	0.025641	0.0322581	0.0175439	0.0254237	0.0357143	0.0344828	0.0263158	0.030303	0.0175439	0.0175439	0.025641	0.0175439	0.0441176	0.0344828	0.0243902	0.0172414
LGG_M211	0.0363636	0.0357143	0.0434783	0.0338983	0.0444444	0.0392157	0.0425532	0.0434783	0.031746	0.0416667	0.0285714	0.0384615	1	0.0350877	0.0434783	0.0392157	0.0425532	0.0392157	0.0444444	0.0434783	0.0377358	0.0266667	0.0408163	0.0392157	0.0294118	0.0217391	0.0392157	0.037037	0.0363636	0.0416667	0.0434783	0.0444444
LGG_M221	0.0227273	0.0224719	0.0363636	0.0338983	0.0319149	0	0.0309278	0.0268456	0.0245902	0	0.0232558	0.0210526	1	0	0.0288462	0.0238095	0.0217391	0.0210526	0	0.0212766	0	0	0.0212766	0.0222222	0.0196078	0	0	0.0229885	0.0243902	0.0224719	0.0212766	0.03
LGG_M222	0.0188679	0.0357143	0.0333333	0	0	0.0434783	0.02	0.0283019	0.0298507	0.038961	0.0267857	0.0212766	1	0.0333333	0	0.0217391	0.0350877	0.0416667	0.0212766	0.0408163	0.0212766	0.0224719	0.025	0.0253165	0.0192308	0.029703	0	0.0357143	0.0212766	0	0.0117371	0.04
LGG_M225	0.0266667	0.0235294	0.025641	0.027027	0	0.012987	0.0267857	0.037037	0.0243902	0.0384615	0.0263158	0.0198675	1	0.03125	0.0217391	0.0333333	0.0253165	0.0275229	0.0222222	0.0315789	0.0327869	0.025974	0.0217391	0.025	0.03	0.0230415	0.0215054	0.030303	0.0240964	0.0227273	0.0266667	0.0240964
LGG_M29	0.0340909	0.0320197	0.0231548	0.0105485	0.0331034	0.023845	0.0247813	0.0497132	0.0273038	0.0248366	0.0236967	0.0239044	1	0.026824	0.03	0.0291859	0.0178891	0.0231481	0.0266204	0.0261011	0.0285714	0.0229133	0.0379597	0.0254144	0.0210356	0.0257426	0.0348706	0.0218978	0.0314319	0.0233236	0.028777	0.0167286
LGG_M300	0.020202	0.0285714	0.0307692	0.028169	0.0245902	0.0217391	0.0222222	0.0217391	0.0232558	0.0444444	0.0408163	0	1	0.0307692	0.0425532	0.0227273	0.0238095	0.0227273	0.0327869	0.0217391	0.0340909	0.0425532	0.0408163	0.031746	0.0204082	0.0232558	0.0232558	0.0229885	0.029703	0.0392157	0.0227273	0.0377358
LGG_M453	0.0238095	0.0348259	0.0330969	0.027027	0.0277778	0.0215054	0.031746	0.0428571	0.030303	0.0215054	0.0241546	0.0306122	1	0.03	0.0367647	0.0289855	0.0247934	0.0330579	0.0390625	0.0366972	0.036036	0.0275229	0.0294118	0.0353982	0.0283019	0.0428571	0.0338164	0.027027	0.0462963	0.0289855	0.0267857	0.0301724
LGG_M521	0.037037	0.0333333	0.0333333	0.0384615	0	0.04	0.037037	0.0444444	0.0384615	0.0384615	0.0357143	0	1	0.037037	0.04	0.04	0.037037	0.037037	0	0.0243902	0	0.0103806	0	0.0384615	0	0.0384615	0.037037	0.0444444	0.03125	0	0.0333333	0.0384615
LGG_M582	0.0225225	0.0314961	0.0402685	0.0188679	0.0245098	0.0149254	0.0265152	0.033195	0.0249307	0.0223214	0.0244755	0.0246305	1	0.0241546	0.0278746	0.035225	0.0242718	0.0429185	0.0242588	0.0316206	0.0235849	0.0305677	0.0364146	0.0222222	0.0197044	0.0216049	0.0251572	0.0181818	0.0188679	0.0167364	0.0283688	0.0232558
LGG_M590	0.0267857	0.0276498	0.0173913	0.0366972	0.0206897	0.0294118	0.0359712	0.0263158	0.0325203	0.0181818	0.0232558	0.0230769	1	0.0291971	0.0422535	0.0322581	0.018018	0.0446927	0.0229008	0.036036	0.0316456	0.0266667	0.0367647	0.0266667	0.0265487	0.0168067	0.0310881	0.0272109	0.020202	0.0300752	0.0314961	0
LGG_M591	0.0147059	0.025641	0.0373832	0.0240964	0.028169	0.0220994	0.0253165	0.0298507	0.0273973	0.025974	0	0.0243902	1	0.0232558	0.0357143	0.0232558	0.027027	0.0273973	0.025641	0.030303	0.028169	0.0285714	0.0208333	0	0	0.0187793	0.0206186	0.0285714	0.0204082	0	0.040404	0.0147059
LGG_M608	0.0205479	0.0230769	0.0212766	0.0218579	0.0424242	0.0198675	0.0175439	0.0341463	0.0229358	0.0234375	0.0176991	0.0172414	1	0.0178571	0.0266667	0.0245902	0.0247934	0.0242424	0.0220588	0.018018	0.0189573	0.028436	0.0178571	0.021978	0.0241935	0.0241935	0.0175439	0	0.025641	0.0207254	0.0276498	0.0247934
LGG_M626	0.0449438	0.0471698	0.0357143	0.0491803	0.0263158	0.0298507	0.03125	0.0494505	0.0357143	0.0298507	0.038961	0.0327869	1	0.031746	0.0405405	0.0298507	0.0277778	0.0352941	0.0225564	0.0344828	0	0.0178571	0.03125	0.0357143	0	0.0422535	0.030303	0.0422535	0.0434783	0.0333333	0.0365854	0.030303
LGG_M629	0.0277778	0.0225564	0.0227273	0.0227273	0.0235294	0	0.0235294	0.0482759	0.0263158	0.03	0.015873	0.0277778	1	0.0204082	0.0224719	0.0309278	0.0263158	0.0220588	0.0243902	0.0273973	0.0232558	0	0.0337079	0	0.027027	0.0263158	0.0277778	0	0.0263158	0.0176056	0.0263158	0.025974
LGG_M632	0.0196078	0.0234375	0.027027	0.0188679	0.0205479	0.0232558	0.0176991	0.0481928	0.0254777	0.0190476	0.0206186	0.0254237	1	0.0298507	0.0242424	0.0229008	0.0224719	0.0166667	0.0280374	0.0288462	0.025	0.0242718	0.0203488	0.0285714	0.0197368	0.025	0.0289855	0.0245902	0.0231214	0.0344828	0	0.0188679
LGG_M633	0.025	0.0315789	0.0190476	0.0263158	0.0267857	0.0307692	0.025	0.0263158	0.0246914	0.0240964	0.0258621	0.027027	1	0.025974	0.027027	0.0240964	0.0266667	0.0240964	0.0375	0.0229885	0.032967	0.0215054	0.0225564	0.0210526	0.0306122	0.0263158	0.0190476	0.019802	0.0254237	0.0357143	0	0.0240964
LGG_M650	0.0315789	0.0241935	0.025641	0	0.0390625	0.0192308	0.0230769	0.0265487	0.031746	0.0275862	0.0149254	0.0267857	1	0.0208333	0.0214286	0.0191083	0.0225564	0	0.03125	0.0218579	0.024911	0.0234375	0.0294118	0	0.0161943	0.0185185	0.0222222	0.0207469	0.0265487	0.0196078	0.0247934	0.036036
LGG_M652	0.0289855	0.0283019	0.0272727	0.0239521	0.0258621	0	0.0307692	0.0446429	0.025	0.0275229	0.0338983	0.0254777	1	0.0181818	0.0315789	0.0277778	0	0.0216216	0.0320513	0.03207	0.0285714	0.0254777	0.0252101	0.0421053	0.029703	0.0285714	0.0322581	0.0340136	0.037037	0.0413223	0.0218579	0.0268456
LGG_M707	0.0138504	0.0229226	0.0169492	0.0178117	0.0123077	0.0250447	0.0255319	0.0335196	0.0143266	0.0122699	0.0165289	0.0192308	1	0.0174927	0.0192308	0.0238806	0.0164835	0.0229277	0.04	0.0218069	0.02693	0.0239316	0.0162338	0.017094	0.021327	0.00628931	0.00974026	0.012945	0.0123077	0.00990099	0.0178571	0.0194986
LGG_M710	0.025974	0.0437956	0.016129	0.0263158	0.0405405	0.0265487	0.027027	0.0447761	0.0277778	0.0307692	0.037037	0.030303	1	0.0288809	0.0280374	0.03125	0.04	0.025641	0.0266667	0.016129	0.0149813	0.0298507	0.0298507	0.0217391	0.0441176	0.016129	0.0322581	0.0253165	0.0327869	0.031746	0	0.0235294
LGG_M721	0.0263158	0.0230769	0.0408163	0	0.025	0	0.0352941	0.0291971	0.0272727	0	0.025641	0.0240964	1	0.0215054	0.0326087	0.0263158	0.025	0.0240964	0	0	0	0	0.0243902	0.025641	0.0206186	0	0	0.0266667	0.027027	0.025974	0.0243902	0.0340909
LGG_M728	0.0333333	0.0357143	0.0333333	0.0487805	0	0.047619	0.037037	0.0434783	0.0357143	0.0384615	0.04	0.0454545	1	0.04	0.0434783	0.047619	0.03125	0.0416667	0.0434783	0.0416667	0.047619	0.047619	0.047619	0.04	0	0.0434783	0.0454545	0.047619	0.037037	0.0454545	0.031746	0.047619
LGG_M743	0.0434783	0.04	0	0.0454545	0	0.04	0.0416667	0.030303	0.0454545	0.0454545	0.0416667	0.0384615	1	0.0434783	0.0454545	0.0454545	0	0.0434783	0.0384615	0.0384615	0.0434783	0.0454545	0.0434783	0	0.037037	0.0277778	0.0322581	0.037037	0.04	0.04	0.0454545	0.0454545
LGG_M8	0.0496454	0.042735	0.0265487	0.0291262	0.0285714	0.038835	0.0368098	0.047619	0.0347222	0.0379747	0.0443038	0.0291667	1	0.0380952	0.025974	0.0485437	0.0307692	0.034965	0.0347826	0.031746	0.026455	0.0245902	0.0373832	0.0461538	0.0350877	0.0206186	0.0432099	0	0.0454545	0.0282486	0.0314465	0.0392157
LGG_M82	0.0377358	0.049505	0.0344828	0.027972	0.0219298	0.0202703	0.0357143	0.0454545	0.0291262	0.0314961	0.027027	0.0253165	1	0.0245902	0.027027	0.0296296	0.025	0.0485437	0.0288462	0.037037	0.0232558	0.0285714	0.0277778	0.0384615	0.0288462	0.0188679	0.0252101	0.0192308	0.0205128	0.0288462	0.0166667	0.0291262
LGG_M86	0.0203046	0.0361446	0.0299401	0.0394265	0.03125	0.0228013	0.0357143	0.0326797	0.0479042	0.0238095	0.0314961	0.0241287	1	0.0402685	0.0285714	0.0254777	0.0321285	0.0374332	0.0350877	0.0294985	0.0248447	0.0271739	0.0321101	0.0301887	0.025	0.037037	0.0352941	0.0186335	0.04	0.0276923	0.0290237	0.0248227
LGG_M87	0.0285714	0.027972	0.027972	0.0215827	0.0206186	0	0.0252101	0.03125	0.0309278	0.0230769	0.0242424	0.0206186	1	0.030303	0.0307692	0.0225564	0.0243902	0.0280374	0.0288066	0.0331492	0.0233645	0.0234742	0.03	0.0418848	0.0265487	0.025	0.0248447	0.0214286	0.0194175	0.025	0.0235294	0.0215827
LIHC_M1341	0.0398671	0.040619	0.0209059	0.0257511	0.0307692	0.0227273	0.0207469	0.0209205	0.0200501	0.0149254	0.029661	0.0215517	0.027451	1	0.0344828	0.0196078	0.021164	0.0153846	0.0230769	0.0365631	0.0409091	0.0271493	0.0218579	0.0265487	0.0254237	0.0229885	0.0211268	0.0224719	0.0205128	0.0210084	0.015625	0.0151515
LIHC_M1402	0.030303	0.0288462	0.0300752	0.0194175	0.0210526	0.0204082	0.027027	0.0246914	0.0275229	0.0212766	0.039604	0.027027	0.0223464	1	0.0291262	0.0234375	0.0204082	0.030303	0.03125	0.025974	0.037037	0.030303	0.0212766	0.0204082	0.03125	0.0196078	0.0343137	0.0247934	0.0206186	0.0208333	0.020202	0.03125
LIHC_M1569	0.0301887	0.035343	0.0199005	0.0271739	0.0363636	0.025641	0.0215054	0.0232558	0.0222841	0.0186335	0.0357143	0.0207254	0.029703	1	0.0429448	0.0191257	0.0209424	0.0193548	0.0248756	0.0333333	0.0346535	0.0331492	0.0207469	0.026738	0.0297619	0.025974	0.0235294	0.0264317	0.0224215	0.0133333	0.0197368	0.0189873
LIHC_M160	0.0403727	0.0421053	0.0264706	0.0243056	0.0253165	0.0246305	0.0226131	0.0187266	0.0313112	0.0116732	0.0239726	0.0209059	0.0305085	1	0.027027	0.0195652	0.0210526	0.0195312	0.0224719	0.0348837	0.0383838	0.0226629	0.0213777	0.0212766	0.0219512	0.0235849	0.0194175	0.0217391	0.02	0.018648	0.0214592	0.011811
LIHC_M1600	0.028	0.0321199	0.0220588	0.0297619	0.0392157	0.0271493	0.0235294	0.0217391	0.0233236	0.0206897	0.0388889	0.0225989	0.03	1	0.047619	0.0201342	0.0197368	0.0215827	0.027027	0.0310559	0.028133	0.0301205	0.0222222	0.0184502	0.0328947	0.0149254	0.0245399	0.028436	0.0241546	0.0149254	0.0220588	0.0211268
LIHC_M186	0.0224719	0.0425532	0.0319149	0.0306122	0.0179211	0.0202429	0.0267857	0.0208333	0.0289017	0.025641	0.0288462	0.0314465	0.0208333	1	0.0264901	0.034188	0.0280374	0.0422535	0.025	0.0264317	0.0220994	0.0431373	0.0254777	0.0284698	0.017192	0.0263158	0.0278638	0.01875	0.0454545	0.0164835	0.0263789	0.0218579
LIHC_M187	0.0209059	0.0328283	0.0323529	0.0185185	0.02	0.0225	0.0243056	0.0235043	0.0291262	0.0189189	0.0289389	0.0216718	0.0263158	1	0.0225564	0.025641	0.0191388	0.0220884	0.0266667	0.022113	0.0228137	0.0242537	0.0301205	0.0152439	0.019685	0.0196721	0.0366197	0.0249307	0.0336538	0.0180723	0.00796813	0.033241
LIHC_M189	0.0313725	0.027933	0.021327	0.0308483	0.0241187	0.0224439	0.0348837	0.0213904	0.0275424	0.0265487	0.0498812	0.0274223	0.0228426	1	0.022869	0.0401606	0.0245399	0.0185759	0.0334646	0.0356164	0.02589	0.0219378	0.025	0.0212202	0.0300546	0.0220751	0.0264228	0.0273973	0.0213465	0.0255102	0.0195531	0.0249307
LIHC_M194	0.0280899	0.0185185	0.0208333	0.0246914	0.0361446	0.0222222	0.0229885	0.0348837	0.0212766	0.029703	0.025641	0.0131579	0	1	0.025974	0.021978	0.025974	0.0261438	0.0246914	0.030303	0.0266667	0.0280374	0.032967	0.0227273	0.025641	0.0252101	0.0291262	0.017301	0.015873	0.025974	0	0
LIHC_M203	0.021978	0.0251479	0.0222222	0.0207373	0.0304709	0	0.0247525	0.0232558	0.0188679	0.0122699	0.0314233	0.0297872	0.015528	1	0.02267	0.0230769	0.0194805	0.0255009	0.0262812	0.0210084	0.0282318	0.0212121	0.0195382	0.0215054	0.00974026	0.0184564	0.035503	0.0157068	0.0235081	0.00946372	0.0272904	0.0225989
LIHC_M204	0.0392157	0.0232558	0.0194175	0.0253165	0.028169	0.0266667	0.0272727	0.0235294	0.036036	0.0229885	0	0.0266667	0.024	1	0.0240964	0.040404	0.0361446	0.0326087	0.025641	0.0273973	0.0194553	0.030303	0.03	0.027027	0.0319149	0.0309278	0.0285714	0.0263158	0.0135135	0.0240964	0.025641	0.0294118
LIHC_M206	0.0482759	0.015625	0.0337079	0.0322581	0.0431655	0.0194805	0.0344828	0.0238095	0.0337079	0.0210526	0.0258621	0	0.0240964	1	0.0352941	0.0240964	0.025	0.0333333	0.037037	0	0.0208333	0.032967	0.018018	0.0246914	0.0227273	0.0294118	0.0288462	0.0365854	0.0210526	0	0.025	0.0373134
LIHC_M322	0.025	0.027027	0.0375	0.027027	0.0224719	0.0229885	0.0291262	0.0277778	0.032967	0.0263158	0.0326087	0.025974	0.0277778	1	0.0361446	0.0306122	0.027027	0.0405405	0.0277778	0.0273973	0.0267857	0.0344828	0.0263158	0.031746	0.0273973	0.027027	0.0273973	0.027027	0.0263158	0.0263158	0.0202703	0.0243902
LIHC_M44	0.0416667	0.0289855	0.031746	0.0363636	0.0357143	0.0217391	0.0258621	0.0289855	0.0212766	0.0357143	0.0266667	0.0444444	0.0338983	1	0.0222222	0.0253165	0.0444444	0.04	0.021978	0.0434783	0.0263158	0.0263158	0.0298507	0.0212766	0.0444444	0.0217391	0.0273973	0	0.0217391	0.0444444	0.0327869	0.0327869
LIHC_M51	0.0333333	0.047619	0.0434783	0.0454545	0.0230769	0.047619	0.0384615	0.0434783	0.0454545	0.0454545	0.047619	0.0454545	0.04	1	0.0454545	0.0344828	0.0454545	0.0384615	0.0454545	0	0.04	0.04	0.0454545	0.0384615	0.04	0.0384615	0.0344828	0.0384615	0.04	0.0344828	0.0229885	0.0434783
LIHC_M668	0.0350877	0.0269058	0.034188	0.0307692	0.0352113	0.0330579	0.0310345	0.03125	0.0298507	0.0304878	0.0336134	0.0442478	0.0228571	1	0.04	0.0340909	0.030303	0.0258621	0.0326797	0.0220588	0.0241935	0.0258621	0.0208333	0.0238095	0.0230769	0.0229008	0.0267857	0.0333333	0.027451	0.0347826	0.0212766	0.0212766
LIHC_M675	0.0178571	0.031746	0.027027	0.0315789	0.0425532	0	0.0253165	0.0365854	0.028169	0.030303	0.031746	0.0422535	0.0322581	1	0.0327869	0.0434783	0.0322581	0.0487805	0.0315789	0.0189873	0.015873	0.0307692	0.030303	0.0322581	0.03125	0.0352941	0	0.0405405	0.04	0.0294118	0.0384615	0
LIHC_M695	0.04	0.0436364	0.0255474	0.0261194	0.027027	0.0232558	0.0214133	0.0181818	0.0283976	0.0126582	0.0257353	0.0224719	0.0289855	1	0.0292887	0.0166667	0.018797	0.0182556	0.0211268	0.0360825	0.04	0.0233463	0.0224439	0.0229008	0.0230769	0.0222222	0.021692	0.0207101	0.0217391	0.0195599	0.0131579	0.0128205
LIHC_M733	0.0263158	0.0350877	0.0384615	0.0392157	0.0416667	0.0212766	0.0294118	0.0428571	0.04	0.0425532	0.0416667	0.0416667	0.0454545	1	0.0434783	0.0363636	0.04	0.0425532	0.0377358	0.0253165	0.046875	0.0212766	0.0212766	0.0416667	0.0294118	0.0428571	0.0408163	0.04	0.0434783	0.0408163	0.025641	0.0232558
LIHC_M771	0.0277778	0.0275862	0.03	0.0173913	0.0188679	0.0185185	0.0243902	0.0229885	0.0247934	0.0188679	0.0353982	0.0277778	0.0209424	1	0.0273438	0.0214286	0.0231214	0.027027	0.0277778	0.0240964	0.0420168	0.0277778	0.0188679	0.0211268	0.0277778	0.0245902	0.0372093	0.0225564	0.0183486	0.0185185	0.018018	0.030303
LIHC_M784	0.0218069	0.0190476	0.0246305	0.0341463	0.0163043	0.0180723	0.0240964	0.0182927	0.0342857	0.0242424	0.0243902	0.0242915	0.0273224	1	0.0185185	0.0238095	0.023569	0.0327869	0.0118343	0.0223048	0.0174419	0.0217391	0.0199203	0.0180995	0.0114286	0.0255102	0.0205128	0.0216216	0.0180723	0.0226244	0.0184502	0.0171674
LIHC_M801	0.0268097	0.0273973	0.0289855	0.0278884	0.0250627	0.0227273	0.0233813	0.0213675	0.0235849	0.0211416	0.0381944	0.0244499	0.0333333	1	0.0234604	0.0223464	0.0176211	0.0276243	0.0213904	0.0307018	0.0143541	0.0196078	0.0233918	0.0257732	0.0263158	0.025641	0.0284091	0.0225564	0.015	0.0388889	0.0115607	0.0271493
LIHC_M839	0.0171429	0.0234604	0.0205128	0.0161943	0.034632	0.0116279	0.0211039	0.0194444	0.0233645	0.0163043	0.0246914	0.0193237	0	1	0.0185185	0.0291262	0.0157068	0.015873	0.0246479	0.0121951	0.0179641	0.0319149	0.0180723	0.0215054	0.0121951	0.015544	0.0186667	0.0160643	0.011976	0.0167598	0.018622	0.0233645
LIHC_M980	0.0298507	0.0280374	0.0251046	0.029703	0.020202	0.027027	0.0273973	0.0338983	0.0384615	0.031746	0.0315789	0.030303	0.0263158	1	0.031746	0.028169	0.0333333	0.0322581	0.0338983	0.0327869	0.0235294	0.0327869	0.031746	0.0353982	0.0333333	0.0306122	0.028169	0.0158416	0.031746	0.031746	0.0222222	0.0260417
LUAD_M215	0.0352645	0.045977	0.0292553	0.0258621	0.0252101	0.012931	0.0253165	0.026616	0.0459016	0.0252101	0.0367893	0.0206186	0.0337079	0.0303468	1	0.0353982	0.0233645	0.037037	0.0382916	0.0224439	0.0314961	0.0253968	0.0303688	0.0386364	0.0169492	0.0246575	0.0362903	0.0262751	0.0192308	0.0271318	0.033237	0.0143885
LUAD_M259	0.047619	0.04	0.0277778	0.0222222	0.0232558	0.0215054	0.0444444	0.0163934	0.0322581	0.0243902	0.0217391	0.0222222	0.0416667	0.0222222	1	0.0408163	0.04	0.031746	0	0.0454545	0.0277778	0.0232558	0.0454545	0.0222222	0.0283019	0.0434783	0.0217391	0.0327869	0.0434783	0.0232558	0.0361446	0.027027
LUAD_M377	0.04	0.0392157	0.0333333	0.037037	0.025974	0.0416667	0.0425532	0.0333333	0.0289855	0.0212766	0.0232558	0.0232558	0.0444444	0.030303	1	0.0377358	0.0392157	0.0465116	0.0266667	0.031746	0.0350877	0.0232558	0.0444444	0.025	0.0465116	0.0227273	0.0273973	0.0232558	0.0263158	0.028169	0.0227273	0.0227273
LUAD_M53	0.0285714	0.0307692	0.0307692	0.0175439	0.0285714	0.0238095	0.0333333	0.021978	0.025974	0.0206186	0.025641	0.0298507	0.031746	0.047619	1	0.03125	0.0307692	0.025641	0.0169492	0.0338983	0.0253165	0.0172414	0.0338983	0.0185185	0.0247934	0.0327869	0.0258065	0.0428571	0.0357143	0.0172414	0.0306122	0.027027
LUAD_M583	0.0285714	0.0363636	0.0332226	0.038835	0.0290698	0.0253807	0.0227273	0.0320513	0.0441989	0.0283019	0.0309278	0.0202703	0.0357143	0.0196078	1	0.0380952	0.0201342	0.0283688	0.040404	0.0309278	0.0285714	0.023622	0.0258065	0.0287081	0.0246914	0.0260417	0.0280374	0.0181818	0.027027	0.0204082	0.0204082	0.0267857
LUAD_M653	0.0353357	0.0258065	0.033557	0.0192308	0.0169492	0.0267857	0.027972	0.0465116	0.0238908	0.0205479	0.0217391	0.0238095	0.0333333	0.0225564	1	0.0344828	0.0300752	0.0235849	0.0362319	0.025641	0.0416667	0.0162602	0.0383142	0.025974	0.015748	0.0287356	0.0295567	0.0242588	0.0268456	0.0243902	0.0325342	0.0169492
LUAD_M658	0.0243902	0.0232558	0.0238095	0	0.0243902	0.0243902	0.0363636	0.03	0.0277778	0.0232558	0.0408163	0.0238095	0.0124481	0.0465116	1	0.0487805	0.0227273	0.0232558	0.04	0.0333333	0.0266667	0.0227273	0.027027	0.0227273	0.0227273	0.02	0.0243902	0.0222222	0.0444444	0.0238095	0.0227273	0.0238095
LUAD_M95	0.0366972	0.028481	0.0272727	0.0288462	0.0194175	0.020202	0.0480769	0.0272727	0.0280374	0.0247934	0.0283019	0.0210526	0.0243902	0.0326087	1	0.0451613	0.028436	0.0233918	0.0192308	0.0265487	0.0280374	0.0214286	0.029703	0.0210526	0.0229358	0.0168067	0.024	0.0188679	0.0235294	0.0294118	0.0275229	0.0215054
LUSC_M242	0.0423729	0.0428571	0.037037	0.0392157	0.028169	0.0425532	0.0384615	0.0465116	0.0384615	0.0322581	0.0379747	0.0357143	0.0273973	0.0444444	0.04	1	0.0322581	0.027027	0.0384615	0.0384615	0.0493827	0.0266667	0.0384615	0.0408163	0.0204082	0.0408163	0.037037	0.0333333	0.037037	0.0340909	0.0363636	0.0444444
LUSC_M307	0.0263158	0.0283019	0.025641	0.023622	0.0289855	0.0243902	0.0487805	0.025	0.03125	0.0294118	0.0254237	0.0272727	0	0.0263158	0.0285714	1	0.0235294	0.025974	0.0277778	0.0294118	0.0309278	0.0208333	0.021978	0.0243902	0.025641	0.0333333	0.025641	0.0232558	0.0379747	0.0246914	0.0212766	0.0277778
MESO_M117	0.0344828	0.0277778	0.0434783	0.0350877	0.010989	0.025641	0.0309278	0.0227273	0.010989	0.0294118	0.0204082	0.0188679	0.024	0.0261438	0.026087	0.0241935	1	0.0252101	0.030303	0.0277778	0.0220588	0.02	0.03	0.0208333	0.010989	0.0225564	0.0204082	0.0333333	0.026087	0.0184332	0.021645	0.0220588
MESO_M125	0.0243902	0.0212014	0.0344828	0.025	0.0198675	0.0126582	0.0326087	0.0212766	0.0245902	0.0126582	0.0305344	0.0350877	0.03	0.0246914	0.0227273	0.0326087	1	0.039604	0.0253165	0.0222222	0.0261438	0.0238095	0.0319149	0.0253165	0	0.0294118	0.025	0.0306748	0.0309278	0.025974	0.0243902	0.0288462
MESO_M126	0.0235294	0.0265487	0.025641	0.031746	0.0246914	0.0128205	0.0232558	0.0251572	0.0357143	0.025641	0.0337079	0.0308642	0.025974	0.0405405	0.025	0.0394737	1	0.025641	0.0322581	0.025974	0.0240964	0.025	0.0246914	0.036036	0.021978	0.0235294	0.0210526	0.0266667	0.0246914	0.0266667	0.0232558	0.0238095
MESO_M127	0.030303	0.0259067	0.0309278	0.0173913	0.0239521	0.033557	0.0212766	0.0208333	0.0275229	0	0.020202	0.0212766	0.0225564	0.0206897	0.0238095	0.024	1	0.0246914	0.0267857	0	0.0240964	0.0294118	0.0434783	0.0258065	0.0254237	0.0228571	0.0210526	0	0.0206186	0.0210526	0.0217391	0.021978
MESO_M1305	0.025641	0.0263158	0.0265487	0.0263158	0.025641	0.0263158	0.0224719	0.030303	0.0273973	0	0.0491803	0.0434783	0.0327869	0.0350877	0.0132159	0.025	1	0.047619	0.025	0.025641	0.0263158	0.025641	0.0307692	0.025	0	0.0408163	0.0243902	0.0408163	0.0344828	0	0.0227273	0.0392157
MESO_M137	0.028169	0.03125	0.030303	0.0253165	0	0.025974	0.030303	0.0217391	0.0310559	0.0307692	0	0.0234375	0.03125	0.0322581	0.0447761	0.0322581	1	0.0306122	0.030303	0.0153846	0.0367647	0.031746	0.0322581	0.0333333	0	0.0267176	0.025974	0.03125	0.0307692	0.028169	0	0.030303
MESO_M1402	0.0307692	0.0294118	0.0243902	0.0487805	0.0338983	0.03125	0.0392157	0.0326087	0.0377358	0.0350877	0.030303	0.0434783	0.0363636	0.031746	0.037037	0.025641	1	0.047619	0.0243902	0.0340909	0.0243902	0.0410959	0.04	0.0243902	0.0273973	0.0363636	0.0307692	0.0425532	0.0344828	0.0487805	0.0232558	0.0322581
MESO_M1453	0.026455	0.0230769	0.0319149	0.0186916	0.042735	0.018018	0.0416667	0.0277778	0.0314136	0.0186916	0.0285714	0.0347826	0.032	0.036036	0.0258065	0.0230415	1	0.0378788	0.0444444	0.0232558	0.0266667	0.0366972	0.0416667	0.0339806	0.0393701	0.033557	0.0471698	0.0336134	0.0431034	0.0336134	0.0272727	0.0254237
MESO_M1473	0.0294118	0.0441176	0.0333333	0.028169	0	0.0266667	0.0265487	0.0229885	0.0266667	0.0144928	0.025974	0	0.0263158	0.0266667	0.0273973	0.0416667	1	0.025974	0.0294118	0.0306122	0.0230769	0.0263158	0.0267857	0.0285714	0.0232558	0.021978	0.0266667	0.0266667	0.032967	0.0208333	0.027027	0.0352941
MESO_M1475	0.0397351	0.0308642	0.0306748	0.0364964	0.0289855	0.0264901	0.024911	0.0241935	0.0294118	0.0193548	0.0344828	0.0322581	0.031746	0.0204082	0.0243902	0.038674	1	0.0357143	0.0220588	0.015873	0.0175439	0.0234375	0.034965	0.020979	0.027027	0.0292208	0.0196078	0.015873	0.0215827	0.0382514	0.015873	0.0298507
MESO_M1484	0.0282686	0.0267261	0.034188	0.024055	0.0264151	0.0187793	0.0381944	0.0189394	0.030581	0.0208	0.0291667	0.0192308	0.0197183	0.0245098	0.0288248	0.0294118	1	0.0318841	0.0275591	0.0254545	0.0342466	0.0336283	0.0266667	0.0206186	0.0309278	0.0223642	0.0272727	0.0311526	0.021097	0.0208333	0.0245399	0.026393
MESO_M1505	0.0210526	0.026738	0.0232558	0.0350877	0.0227273	0.042735	0.02	0.0350877	0.024	0.029703	0.0267857	0.0224719	0.0174927	0.0283019	0.0283019	0.0434783	1	0.0235294	0.0294118	0.0227273	0.0245902	0.0310078	0.0206186	0.0322581	0.0210526	0.0165289	0.0227273	0.0212766	0.0322581	0.0272727	0.0342466	0.0214286
MESO_M168	0.0232558	0.0232558	0.0294118	0	0.0344828	0.03	0.025641	0.0217391	0.024	0.0340136	0.0227273	0.0301205	0.021978	0	0.0208333	0.0222222	1	0.0294118	0.0232558	0.0322581	0.0222222	0.0223881	0.0227273	0.0229885	0.0308642	0.0363636	0.020202	0.0280899	0.0344828	0.0220588	0.0206186	0.0192308
MESO_M1696	0.0243902	0.0232558	0.0236686	0.0232558	0.0306122	0.0222222	0.0406977	0.0344828	0.0240964	0.0232558	0.0324675	0.0235294	0.0285714	0.0357143	0.0298507	0.0217391	1	0.0315789	0.0344828	0.0277778	0.0315789	0.0222222	0.029703	0.026738	0.0471698	0.0222222	0.0344828	0.02	0.0245902	0.03	0.0222222	0.0309278
MESO_M1729	0.0390071	0.0352423	0.0355872	0.0221402	0.0234542	0.0247678	0.042471	0.0263158	0.0409556	0.021978	0.0273109	0.0181818	0.0210526	0.0491803	0.0384615	0.040146	1	0.0325733	0.0244898	0.0162602	0.0186335	0.0293454	0.0461165	0.0363636	0.0290909	0.0141509	0.0143541	0.0137615	0.0327456	0.0241379	0.0261324	0.0201342
MESO_M1736	0.0357143	0.0238095	0.0462963	0.0333333	0.0384615	0.0277778	0.0365854	0.037037	0.0363636	0.0322581	0.0422535	0.0185185	0.0327869	0.046875	0.0470588	0.0487805	1	0.025641	0.0285714	0.0307692	0.023622	0.0224719	0.0363636	0.0338983	0.0305344	0.0288462	0.0348837	0.0344828	0.037037	0.0190476	0.0344828	0.0350877
MESO_M1740	0.0338983	0.0408163	0.0454545	0.0263158	0.031746	0.0425532	0.0222222	0.03125	0.0240964	0.0212766	0.027972	0.0373832	0.027027	0.0416667	0.0465116	0.0277778	1	0.0350877	0.0338983	0.0240964	0.0338983	0.025641	0.037037	0.0377358	0.025	0.0263158	0.0265487	0.0204082	0.0232558	0.0307692	0.0375	0.04
MESO_M1763	0.0208333	0.0292398	0.028169	0.0408163	0.025	0.049505	0.0238095	0.0277778	0.025641	0.0352941	0.03125	0	0.0138889	0.021978	0.0333333	0.0416667	1	0.0273973	0.0348837	0.0277778	0.0283019	0.0353982	0.0246914	0.038961	0.0253165	0.0190476	0.0277778	0.025641	0.038961	0.0319149	0.0305344	0.025
MESO_M1770	0.04	0.0240964	0.0384615	0.0108696	0.0384615	0.0416667	0.0416667	0.0416667	0.0384615	0.0416667	0.037037	0.04	0.04	0.04	0.0416667	0.0384615	1	0.0416667	0.0416667	0.0416667	0	0.0416667	0.0454545	0.0416667	0.0416667	0.0416667	0.0322581	0.0232558	0	0.0416667	0.04	0.0416667
MESO_M182	0.044	0.0361991	0.0297398	0.0303738	0.0213904	0.0223214	0.0365297	0.0231214	0.0260586	0.0310078	0.0318182	0.0259366	0.0222222	0.040724	0.0363636	0.036036	1	0.0365297	0.0358566	0.0315315	0.0243902	0.0305677	0.0253521	0.027027	0.012931	0.0285714	0.0320856	0.0250896	0.020202	0.0375587	0.0316742	0.0216606
MESO_M183	0.0291262	0.0294118	0.0412371	0.0307692	0.0396825	0.0212766	0.0337079	0.0263158	0.0337079	0.0217391	0.0380952	0.0333333	0.0275229	0.0231214	0.0431034	0.0294118	1	0.0333333	0.0222222	0.0348837	0.0224719	0.03125	0.0319149	0.0230769	0.0333333	0.0194175	0.0348837	0.0337079	0.03125	0.0315789	0.0217391	0.0319149
MESO_M184	0.033033	0.0220588	0.0271318	0.015873	0.0265957	0.0111732	0.0343511	0.0227848	0.0268199	0.0160428	0.0247934	0.0215054	0.025641	0.021978	0.0267857	0.018018	1	0.0246305	0.0291262	0.0159574	0.0272109	0.0222222	0.026178	0.0279898	0.0252525	0.0227273	0.0282486	0.0210526	0.028436	0.023569	0.0165746	0.015873
MESO_M187	0.0367647	0.0265487	0.0258065	0.027027	0.016	0.0175439	0.0323887	0.0222222	0.0277778	0.0214286	0.0353982	0.0436047	0.0205479	0.0275591	0.027668	0.0346535	1	0.0287356	0.0273973	0.0243902	0.0239521	0.0176991	0.0405405	0.0246914	0.0254777	0.0478723	0.015748	0.0252101	0.0327869	0.0288809	0.0229358	0.0215827
MESO_M193	0.0357143	0.0327869	0.0338983	0.0357143	0.025	0.0394737	0.0428571	0.0333333	0.0338983	0.0266667	0.0273973	0.0416667	0.0263158	0.0273973	0.0447761	0.047619	1	0.0454545	0.0454545	0.029703	0.0410959	0.025	0.0344828	0.0263158	0	0.0422535	0.020202	0.0289855	0.0481928	0.046875	0.0333333	0.0357143
MESO_M194	0.0263158	0.0344828	0.0275229	0.0232558	0.0252101	0.0337079	0.0352941	0.030303	0.0425532	0.0232558	0.036036	0.0240964	0.0235294	0.0275229	0.0392157	0.0230769	1	0.0344828	0.0258621	0.0227273	0.0333333	0.0283019	0.0291262	0.0223881	0.043956	0	0.0208333	0.0212766	0.0207254	0.0238095	0.024	0.0238095
MESO_M204	0.0294118	0.0294118	0.0289855	0.0298507	0.0447761	0.027027	0.04	0.0253165	0.0337079	0.0235294	0.027027	0.0298507	0.0277778	0.026087	0.0434783	0.0309278	1	0.0393701	0.0229885	0.0298507	0.0289855	0.03125	0.0266667	0.0273973	0.0289855	0.025974	0.027027	0.0285714	0.028169	0.0298507	0.0204082	0.0277778
MESO_M208	0.03125	0.0322581	0.0333333	0.0322581	0.03125	0.037037	0.0322581	0	0.0333333	0.0384615	0.0322581	0.0238095	0.0344828	0.0322581	0.0377358	0.03125	1	0.0444444	0.03125	0.030303	0.0327869	0.0454545	0.0294118	0.0322581	0.0333333	0.0465116	0.0333333	0.0322581	0.0273973	0.0333333	0.0333333	0.0333333
MESO_M237	0.0176991	0.0235294	0.037037	0.037037	0.037037	0.0357143	0.0333333	0.0357143	0.0384615	0.037037	0.0357143	0.0384615	0.037037	0.037037	0.0350877	0.037037	1	0.0384615	0.0350877	0.0384615	0.0322581	0.03125	0.030303	0.0384615	0.0357143	0.0384615	0.04	0.0384615	0.0384615	0.0384615	0.0357143	0.0384615
MESO_M56	0.0437956	0.037037	0.037037	0.0308642	0.0296296	0.027972	0.0298507	0.025	0.0403226	0.0248447	0.0252525	0.0397727	0.0314465	0.0331754	0.0361991	0.0310881	1	0.0426829	0.0454545	0.037037	0.0264317	0.0458015	0.0340136	0.028169	0.0342466	0.0259067	0.0351562	0.025641	0.0357143	0.0333333	0.0252525	0.0248447
MESO_M58	0.0462963	0.0277778	0.0307692	0.0315534	0.0269058	0.0381356	0.0280899	0.026178	0.0275229	0.0271084	0.0297619	0.0328358	0.0346535	0.0312012	0.0392157	0.0348259	1	0.0352423	0.024952	0.0241546	0.0240964	0.0238854	0.0331492	0.0285714	0.0326087	0.032967	0.032967	0.0245614	0.0280899	0.0275229	0.0111732	0.0308123
MESO_M662	0.0224719	0.0217391	0.0247934	0	0.0212766	0.025974	0.0350877	0.027027	0.0246914	0.0217391	0.0434783	0.037037	0.0289855	0.0307692	0.0214592	0.0338983	1	0.04	0.0307692	0.0344828	0.0330579	0.0212766	0.0273973	0.0208333	0.0212766	0.0428571	0.0204082	0.0350877	0.0461538	0.0377358	0.0095057	0.0338983
MESO_M663	0.0253165	0.0280374	0.0229885	0.0333333	0.0266667	0.0138889	0.025	0.0261438	0.0384615	0.0277778	0.0277778	0.025	0.028169	0.0441176	0.0254777	0.0428571	1	0.0277778	0.0338983	0.0243902	0.025974	0.027027	0.0266667	0.0380952	0.0235294	0.0253165	0.0224719	0.0289855	0.0266667	0.0243902	0.0142857	0.025
MESO_M666	0.0454545	0.0357143	0.0465116	0.0217391	0.031746	0.030303	0.0465116	0.0266667	0.0425532	0.0227273	0.021978	0.0222222	0.0357143	0.0217391	0.0384615	0.0232558	1	0.047619	0.0327869	0.028169	0.026087	0.0352941	0.0357143	0.0298507	0.0222222	0.0241935	0.0232558	0.0222222	0.0357143	0.0465116	0.0229885	0.0307692
MESO_M71	0.0363636	0.0322581	0.0185185	0.0338983	0.0185185	0.028169	0.0285714	0.0350877	0.038961	0.0344828	0.037037	0.0185185	0.037037	0.0363636	0.037037	0.037037	1	0.0338983	0.0377358	0.030303	0.0289855	0.0224719	0.0377358	0.037037	0.03125	0.0344828	0.0428571	0.027027	0.0357143	0.0277778	0.027027	0.0326087
MESO_M769	0.0357143	0.0266667	0.0379747	0.0416667	0.0212766	0.0266667	0.028169	0.0267857	0.031746	0.025974	0.0298507	0.0307692	0.028169	0.0365854	0.0307692	0.021978	1	0.0322581	0.0183824	0.0373832	0.0273973	0.0322581	0.0285714	0.028169	0.030303	0.03125	0.042735	0.0298507	0.031746	0.0327869	0.03125	0.027027
MESO_M808	0.0258303	0.0241546	0.0310881	0.0178571	0.0409836	0.0172414	0.0406091	0.0265487	0.0306122	0.0178571	0.0277778	0.0333333	0.0307692	0.0344828	0.025	0.0175439	1	0.0364964	0.0428571	0.0223881	0.026087	0.0350877	0.04	0.0331754	0.0378788	0.0324675	0.045045	0.0322581	0.0413793	0.0322581	0.026087	0.0243902
MESO_M811	0.037037	0.0204082	0.0327869	0.0298507	0.0192308	0.0408163	0.0212766	0	0.0215827	0.0212766	0.0333333	0	0.0196078	0.0215054	0.0384615	0.0222222	1	0.0384615	0.02	0.0408163	0.0208333	0.0338983	0.0208333	0.0212766	0.0196078	0.0212766	0.0306122	0.0208333	0.0204082	0.0208333	0.02	0.0208333
MESO_M857	0.0338983	0.0425532	0.0309278	0.0434783	0.0212766	0.0307692	0.0363636	0.0212766	0.0441176	0.03125	0.0377358	0.0217391	0	0.0319149	0.0434783	0.0394737	1	0.0471698	0.030303	0.0217391	0.0333333	0.0434783	0.037037	0.0377358	0.0333333	0.0227273	0.0377358	0.0212766	0.037037	0.0392157	0	0.0392157
MESO_M883	0.0366492	0.0466531	0.0252708	0.0253165	0.0314136	0.0276243	0.0381679	0.0282486	0.0302267	0.0297398	0.0384615	0.0271739	0.0234114	0.0232945	0.0274725	0.0454545	1	0.0251799	0.0250784	0.0177515	0.0244898	0.0345622	0.0219561	0.0191083	0.0301508	0.0191083	0.025	0.0193237	0.0191083	0.0231214	0.0386473	0.0181818
MESO_M889	0.0357143	0.0338983	0.0434783	0.0217391	0	0.0238095	0.0441176	0.027027	0.0322581	0.0363636	0.0220588	0.0294118	0.0212766	0.0408163	0.0384615	0.0425532	1	0.0344828	0.030303	0.030303	0	0.0350877	0.0405405	0.0212766	0.0208333	0.0394737	0.0208333	0.0461538	0.0384615	0.0344828	0.0416667	0.0246914
MESO_M99	0.0412371	0.0363636	0.0333333	0.0229008	0.0193798	0.025	0.0392157	0.0198413	0.0288462	0.0181818	0.017094	0.025	0.025641	0.031746	0.0325203	0.0294118	1	0.0454545	0.0294118	0.027027	0.025	0.03	0.0176991	0.02	0.0408163	0.0291262	0.0238095	0.0344828	0.02	0.0490196	0.025	0.02
OV_M100	0.025641	0.0285714	0.0408163	0.028169	0.0405405	0.025974	0.025641	0.027027	0.0394737	0.026087	0.0277778	0	0.0347826	0.0380952	0.038961	0.0322581	0.0246914	1	0.0254237	0.0291262	0.0357143	0.0394737	0.0461538	0.030303	0.0228571	0.025	0.0454545	0.0149254	0.037037	0.038961	0.036036	0.0240964
OV_M1282	0.0384615	0.0434783	0.037037	0.0147059	0.037037	0.0384615	0.0294118	0.04	0.0294118	0.0357143	0.0416667	0.04	0.0322581	0.0357143	0.0322581	0.0416667	0	1	0.0344828	0.037037	0.0384615	0.0416667	0.0285714	0.0416667	0.0384615	0.0416667	0.0434783	0.04	0.0384615	0.047619	0.037037	0.0416667
OV_M14	0.0426136	0.037182	0.0378486	0.0190736	0.04329	0.0198238	0.0330579	0.0260417	0.0412758	0.0288184	0.0307414	0.0330969	0.0358744	0.0403458	0.0384615	0.0382353	0.0306306	1	0.0315126	0.0353774	0.0251938	0.0344828	0.0358566	0.0243309	0.0422265	0.0303738	0.0291971	0.0265252	0.026087	0.0365854	0.0420168	0.0301624
OV_M208	0.0283688	0.0354223	0.0331126	0.0178571	0.0263158	0.0234375	0.0328767	0.0285714	0.0454545	0	0.0222222	0.0206897	0.0267857	0.0305344	0.0486111	0.0315789	0.0254777	1	0.0397351	0.039604	0.0368421	0.03125	0.0254237	0.0292887	0.0222222	0.034965	0.0377358	0.0373832	0.0480769	0.0241935	0.018797	0.0189394
OV_M453	0.0434783	0.0384615	0.04	0.0347826	0.0277778	0.0380952	0.0319149	0.03125	0.0324675	0.038961	0.0454545	0.0163934	0.0229885	0.028169	0.0421053	0.035	0.0410959	1	0.0348837	0.0384615	0.0275862	0.0319149	0.0309278	0.0428571	0.0410959	0.030303	0.0405405	0.0387597	0.0394737	0.03125	0.03125	0.0224719
PAAD_M1116	0.0461538	0.0434783	0.03	0.0410959	0.0294118	0.03125	0.0379747	0.0333333	0.038961	0.047619	0.0215054	0.0410959	0.0461538	0.0357143	0.038961	0.038835	0.031746	0.0434783	1	0.0277778	0.0306122	0.0434783	0.027027	0.0363636	0.0470588	0.0153846	0.0363636	0	0.037037	0.0379747	0.0304878	0.0357143
PAAD_M12	0.0378788	0.0230415	0.0391304	0.030303	0.04	0.045082	0.033195	0.0217391	0.0350584	0.0258621	0.0444444	0.0214286	0.0352423	0.039823	0.0442478	0.04	0.0207101	0.0429688	1	0.0408163	0.0381356	0.0165289	0.0434783	0.038961	0.0221402	0.0297398	0.041411	0.0311005	0.0446429	0.0297872	0.0207612	0.0165975
PAAD_M154	0.0440252	0.04	0.0384615	0.0253807	0.0266667	0	0.0348837	0.0208333	0.032967	0.0253165	0.0267857	0.0280374	0.0210526	0.0384615	0.040404	0.027027	0.0372671	0.0275229	1	0.027027	0.0253165	0.0326087	0.030303	0.027907	0.0215054	0.0245098	0.0288462	0.0227273	0.0263158	0.0263158	0.021978	0.0326087
PAAD_M202	0.047619	0.0336134	0.045045	0.0322581	0.0175439	0.0194175	0.0357143	0.0291262	0.03	0.0308642	0.0263158	0.0261438	0.0289855	0.0265487	0.029703	0.0277778	0.0252708	0.0241935	1	0.0234375	0.0239234	0.0338983	0.03	0.0267857	0.040404	0.0215827	0.0283688	0.025641	0.0305344	0.0357143	0.0172414	0.0267857
PAAD_M205	0.0294118	0.0384615	0.046875	0.0377358	0.0350877	0	0.0425532	0.02	0.037037	0.0263158	0.04	0.0208333	0.0309278	0.0408163	0.0408163	0.0461538	0.037037	0.0212766	1	0.0285714	0.0425532	0.027027	0.0416667	0.0266667	0.0208333	0.0375	0.0410959	0.0266667	0.0405405	0.03125	0	0.0263158
PAAD_M218	0.0307692	0.0298507	0.0410959	0.03125	0.0240964	0.031746	0.0307692	0.025641	0.0412371	0.0277778	0.0365854	0.0422535	0.0194805	0.0229885	0.0379747	0.0428571	0.0421053	0.0333333	1	0.0384615	0.021097	0.046875	0.025	0.0422535	0.0307692	0.0263158	0.025974	0.0153846	0.0229885	0.0294118	0.0285714	0.0285714
PAAD_M24	0.038961	0.0340136	0.0291262	0.0298507	0.0294118	0	0.0355872	0.0202703	0.030837	0.0246914	0.020202	0.0422164	0.0205761	0.0402685	0.04	0.0266667	0.0299145	0.0276243	1	0.0196078	0.026455	0.0280899	0.0231214	0.0320856	0.0242424	0.0254777	0.0222222	0.0248447	0.019802	0.0310734	0.0149254	0.0203046
PAAD_M27	0.0306604	0.0180505	0.0394737	0.0331126	0.0204082	0.0276923	0.0358744	0.029316	0.0365854	0.0196507	0.0314685	0.0395604	0.0260708	0.0334646	0.0333333	0.0361446	0.0320988	0.0398406	1	0.02407	0.029316	0.0185874	0.021978	0.0225225	0.0322581	0.0179211	0.0337838	0.0231023	0.0292887	0.0364465	0.0200334	0.0220588
PAAD_M297	0.0357143	0.0238095	0.0247934	0.037037	0.0246914	0.023622	0.03125	0.040404	0.0315789	0.0243902	0.0384615	0.0273973	0.0245098	0.0138889	0.038835	0.028169	0.021978	0.032967	1	0.04	0.019802	0	0.0246914	0.0315789	0.0186916	0.035461	0.0194175	0.0240964	0.0291262	0.0333333	0.0263158	0.027027
PAAD_M336	0.0322581	0.0212766	0.0243902	0.0243902	0.0243902	0.0238095	0.0350877	0.0416667	0.0243902	0.046875	0.0263158	0.0238095	0.0357143	0.0350877	0.0212766	0.037037	0.0465116	0.0434783	1	0.0465116	0.0392157	0.025641	0.0444444	0.0392157	0.0338983	0.0333333	0.0243902	0.037037	0.0238095	0.0357143	0.0272727	0.0444444
PAAD_M345	0.0421053	0.0416667	0.039604	0.03	0.0425532	0.021978	0.0392157	0	0.034188	0.0315789	0.0357143	0.0224719	0.0353982	0.045977	0.0465116	0.0300752	0.0224719	0.0416667	1	0.0266667	0.0352113	0.0170213	0.0333333	0.0366972	0.0264901	0.0283688	0.0326087	0.0258621	0.0421053	0.0348837	0.039604	0.0470588
PAAD_M347	0.0248447	0.0176991	0.036036	0.026087	0.0291971	0.0212766	0.035533	0.0315789	0.03	0.0225564	0.021164	0.0204082	0.0346821	0.023166	0.0294118	0.042735	0.0202703	0.025	1	0.0359712	0.0357143	0.0192308	0.0260417	0.0188679	0.034188	0.0206186	0.0294118	0.0275862	0.0310559	0.0285714	0.0291262	0.0213675
PAAD_M37	0.0373134	0.027027	0.0357143	0.0261438	0	0.020202	0.0372493	0.0227273	0.0307018	0.0315789	0.0239234	0.021978	0.0239521	0.0272109	0.0251572	0.0227273	0.0296053	0.0196078	1	0.0191083	0.0210084	0.0272109	0.0232558	0.0225564	0.03125	0.0178571	0.0235294	0.0265781	0.0379747	0.0283688	0.0137931	0.0212766
PAAD_M378	0.0470588	0.0322581	0.0338983	0.0235294	0.0434783	0	0.0425532	0.031746	0.0217391	0.0232558	0.04	0.0344828	0.0357143	0.0416667	0.0363636	0.0425532	0.0444444	0.0378788	1	0.0454545	0.037037	0.0243902	0.04	0.030303	0.0217391	0.047619	0.0465116	0.0454545	0.0168919	0.0408163	0	0.0285714
PAAD_M38	0.028169	0.0322581	0.0405405	0.0337079	0.0298507	0	0.0485437	0.0294118	0.0491803	0.0232558	0.0333333	0.0333333	0.0280374	0.0338983	0.0338983	0.04	0.0416667	0.0327869	1	0.0326087	0.0350877	0.0307692	0.0493827	0.0235294	0.0273973	0.0333333	0.0361446	0.0307692	0.0357143	0.027027	0	0.0232558
PAAD_M386	0.037037	0.0490196	0.0470588	0.0294118	0.0275862	0.0217391	0.025641	0.0309278	0.0308642	0.0357143	0.045	0.0232558	0.0320513	0.042735	0.0380952	0.0272727	0.0280374	0.037037	1	0.0222222	0.0241935	0.0337838	0.0357143	0.0255319	0.0325203	0.0333333	0.030303	0.0294118	0.0265957	0.028169	0.0254777	0.0340909
PAAD_M391	0.0272727	0.0261438	0.0201342	0.036036	0.0283688	0.0280374	0.0253165	0.026087	0.04	0.0227273	0.0243902	0.0206186	0.0239521	0.0181818	0.025974	0.0212766	0.0212766	0.02	1	0.0243902	0.019802	0.0357143	0.0210526	0.0215054	0.0268199	0.0178571	0.0243902	0.0217391	0.0284091	0.0206186	0.0275229	0.0347826
PAAD_M40	0.0285714	0.0441176	0.028169	0	0.038961	0.0266667	0.0263158	0.0277778	0.0253165	0.0422535	0.0319149	0.027027	0.0309278	0.021978	0.027972	0.0394737	0.039604	0.028169	1	0.0277778	0.0344828	0.0285714	0.0348837	0.0416667	0.025641	0.0140845	0.025974	0.0288462	0.0283019	0.0285714	0.025974	0.027027
PAAD_M622	0.0469799	0.0277778	0.0441176	0.026738	0.0307692	0.0212766	0.0394737	0.0232558	0.037037	0.0289855	0.0294118	0.0309278	0.0235294	0.03125	0.0449438	0.030303	0.028169	0.03125	1	0.021978	0.0289855	0.030303	0.0277778	0.0283019	0.0153846	0.0211268	0.0319149	0.0253165	0.0288462	0.030303	0.0246914	0.0365854
PAAD_M78	0.0268456	0.0238095	0.0416667	0.0225564	0.0340909	0	0.0380952	0.0235294	0.0277778	0.0224719	0.0319149	0.0296296	0.019802	0.0217391	0.0344828	0	0.0229885	0.0232558	1	0.0232558	0.0235294	0	0.0337079	0.0234375	0.0224719	0.0243902	0	0.0217391	0.03	0.0304569	0.0192308	0.0322581
PAAD_M84	0.0469799	0.0353357	0.0288714	0.0239044	0.0353535	0.0294118	0.0259481	0.0236686	0.021148	0.02	0.0235294	0.0210526	0.0276596	0.0239521	0.0213904	0.025	0.0253165	0.0301508	1	0.039604	0.0362319	0.027027	0.0255474	0.0225225	0.032967	0.030303	0.0204918	0.025641	0.0273973	0.0254777	0.021978	0.0251572
PAAD_M86	0.0286299	0.0324074	0.0402542	0.0215686	0.037123	0.020202	0.035124	0.023301	0.03386	0.0325497	0.0215716	0.0214067	0.0452555	0.0251799	0.0279805	0.0394265	0.0191898	0.0244648	1	0.0242424	0.030479	0.0366013	0.0251177	0.0277228	0.0259481	0.0165094	0.0234657	0.0234043	0.0344828	0.0257511	0.0267176	0.0214008
PCPG_M1126	0.0231214	0.0285714	0.032	0.0252101	0.0359712	0.0208333	0.0272727	0.028169	0.0243902	0.0367647	0.0304348	0.030303	0.0446429	0.0291262	0.0406504	0.0310078	0.0368098	0.0366972	0.0384615	1	0.023622	0.03125	0.023166	0.0358744	0.0291262	0.0442478	0.0268456	0.02	0.0350877	0.0236686	0.0264901	0.030303
PCPG_M1427	0.0218978	0.0228571	0.017094	0.0259067	0.0268199	0	0.0241935	0.0223881	0.0350318	0.015873	0.025641	0.0254777	0.0264901	0.0246407	0.0234375	0.027027	0.0217391	0.0202429	0.0343348	1	0.0209424	0.0168067	0.0173913	0.0246914	0	0.0217391	0.0310078	0.0184049	0.0173913	0.0264901	0.0247525	0.0300752
PCPG_M1487	0.0204082	0.03125	0.0273973	0.0338983	0	0.0224719	0.0289855	0.0196078	0.0289855	0.02	0.0338983	0.0363636	0.0196078	0.0447761	0.0327869	0.0273973	0.0338983	0.0204082	0.0204082	1	0.0363636	0.0377358	0.0204082	0.0377358	0.0192308	0.02	0.0416667	0.0272727	0.0357143	0.037037	0.0384615	0.0298507
PCPG_M1628	0.0376344	0.0360825	0.0257353	0.0327869	0.0393258	0.0373832	0.034188	0.0295359	0.0283688	0.0277778	0.0314136	0.0214286	0.0327869	0.0292683	0.0330579	0.0359712	0.0322581	0.030303	0.0363636	1	0.03125	0.0254237	0.0247934	0.0204082	0.0423729	0.0242424	0.0344828	0.0451128	0.0381679	0.025	0.0390625	0.0352941
PCPG_M190	0.0434783	0.0454545	0.0416667	0.047619	0.0434783	0.0434783	0.0159574	0.0425532	0.0434783	0.04	0.0434783	0.0434783	0	0.04	0.0344828	0.0357143	0.047619	0.0454545	0	1	0.0109091	0.0434783	0.0434783	0.0333333	0.0434783	0.0434783	0	0	0	0.047619	0	0.0416667
PCPG_M208	0.0266667	0.0224719	0.0265487	0.0361446	0.0238095	0.029703	0.030303	0.0227273	0.0238095	0.0209424	0.0333333	0.0272727	0.0246914	0.0224719	0.028169	0.0285714	0.0405405	0.030303	0.030303	1	0.0434783	0.0394737	0	0.0384615	0.0147059	0.027027	0.0298507	0.0325203	0.0333333	0.0298507	0.0322581	0.0416667
PCPG_M211	0.0425532	0.0434783	0.0218579	0.0113636	0	0.021978	0.0208333	0.0379747	0.028777	0.0412371	0.0275229	0.0294118	0.0283688	0.0210084	0.0387097	0.0416667	0.0210526	0.0217391	0.0348837	1	0.025641	0.0215054	0.0246154	0.0218978	0.0222222	0.0196078	0.03125	0	0.0240964	0.0367647	0.0378788	0.0288462
PCPG_M215	0.0298507	0.0224719	0.0175439	0	0	0.0327869	0.0175439	0.025974	0.0344828	0	0.0327869	0.0327869	0.0338983	0.0273973	0.030303	0.046875	0.0344828	0.032967	0.0253165	1	0.0285714	0.021978	0.0291262	0.0175439	0.0298507	0.0175439	0.030303	0	0.031746	0.028777	0.0263158	0.0175439
PCPG_M217	0.0350877	0.031746	0.030303	0.0338983	0.030303	0.0163934	0.025974	0.0412371	0.0307692	0.0243902	0.0238095	0.0277778	0.0319149	0.0288462	0.0178571	0.0169492	0.0273973	0.0273973	0.0451128	1	0.038961	0.0169492	0.030303	0.0340909	0.0361446	0.0294118	0	0.021978	0.023622	0.0322581	0.0289855	0.0338983
PCPG_M218	0.045977	0.020202	0.0273973	0.0208333	0.0135135	0.0246914	0.0294118	0.0416667	0.0340909	0.020202	0.025	0.027027	0.0325203	0.0273973	0.027027	0.0425532	0.025974	0.03	0.0266667	1	0.0405405	0.027027	0.0361446	0.0273973	0.0238095	0.025641	0.03125	0.0149254	0.0470588	0.029703	0.0309278	0.04
PCPG_M244	0.0232558	0.025641	0.0465116	0.0263158	0.0425532	0	0.025974	0.0238095	0.025641	0.030303	0.0263158	0.0350877	0.0273973	0.025641	0.0294118	0	0.0263158	0.0441176	0.0375	1	0.0285714	0.0344828	0.025	0.0408163	0.0273973	0	0.025	0.0363636	0.0263158	0.025641	0.025	0.0408163
PCPG_M25	0.0169492	0.0231362	0.0273438	0.0244898	0.0359712	0	0.0267857	0.027668	0.0339943	0.0176471	0.0362694	0.0321101	0.0217391	0.028626	0.0218978	0.0294118	0.0168539	0.0191257	0.0347349	1	0.0244755	0.0176471	0.0129032	0.0282258	0	0.0234506	0.0236686	0.0248756	0.0129032	0.026362	0.0206612	0.025641
PCPG_M266	0.0201342	0.0220994	0.0155039	0.0243902	0.0281426	0	0.0220588	0.0265487	0.0337423	0.0144928	0.0361446	0.0317848	0.0245399	0.028169	0.0223881	0.0243902	0.02	0.0217391	0.0410959	1	0.0197044	0.0152672	0.015748	0.0229885	0	0.022807	0.0283688	0.0171429	0.015748	0.0245399	0.0233645	0.0283019
PCPG_M27	0.0287356	0.0227273	0.0229008	0.0336134	0.035461	0.0155039	0.0232558	0.0300752	0.0234742	0.0211268	0.0248447	0.0277778	0.027027	0.0367454	0.0493274	0.0289017	0.0243902	0.0240385	0.023166	1	0.0265957	0.0277778	0.0241546	0.0211864	0.0231214	0.0294118	0.0166667	0.0245614	0.020979	0.0308642	0.0153846	0.0271739
PCPG_M271	0.0379747	0.03125	0.025641	0.0447761	0.0264901	0.031746	0.03125	0.0224719	0.0285714	0.0246914	0.015625	0.023622	0.0315789	0.031746	0.0422535	0.0294118	0.0285714	0.027972	0.034188	1	0.025974	0.021978	0.028169	0.0307692	0.0298507	0.0422535	0.0263158	0.0285714	0.0322581	0.0333333	0.0289855	0.0291262
PCPG_M290	0.036036	0.0360825	0.019802	0.0316456	0.0275229	0.02	0.0254237	0.0340557	0.038835	0.0239234	0.029703	0.0309278	0.0420168	0.038835	0.025641	0.0485437	0.028169	0.033557	0.0298507	1	0.0243902	0.0234375	0.0326531	0.0277778	0.0215827	0.037037	0.02	0.0275229	0.025641	0.0185185	0.0327869	0.0412371
PCPG_M291	0.0305344	0.0258621	0.019802	0.0305344	0	0.025641	0.012987	0.0340909	0.0277778	0.012987	0.0212766	0.0217391	0.0374332	0.037037	0.036036	0.0275229	0.0266667	0.0344828	0.025641	1	0.0232558	0.0253165	0.0269058	0.0247934	0.0217391	0.0319149	0.0235294	0.0210526	0.0465116	0.0487805	0.0298507	0.043956
PCPG_M295	0.027027	0.0263158	0.04	0.0285714	0	0.037037	0.025974	0.0289855	0.0238095	0.0229885	0.0422535	0.0266667	0.0333333	0.0294118	0.027027	0.025641	0.0294118	0.0298507	0.029703	1	0.0235294	0.0361446	0.0266667	0.0285714	0.0266667	0.028777	0.028169	0.025974	0.0189873	0.0285714	0.0147059	0.0330579
PCPG_M296	0.0337079	0.0277778	0	0.0229885	0	0	0.0206186	0.03125	0.0261438	0	0.0229885	0.0364964	0.027027	0.0444444	0.0263158	0.025	0.0232558	0.0326087	0.0169492	1	0.0240964	0.0344828	0.0298507	0.025641	0.0235294	0.0246914	0.037037	0.025641	0.025974	0.0243902	0.025	0.0328947
PCPG_M303	0.0266667	0.0289855	0.0178571	0.0338983	0.0208333	0.0172414	0.0357143	0	0.0205479	0.0333333	0.0181818	0.031746	0.0289855	0.0178571	0.038961	0.047619	0.0333333	0.0181818	0.0289855	1	0.0344828	0.0307692	0.0135593	0.026087	0	0.0333333	0.0277778	0.0357143	0.0344828	0.0322581	0.011257	0.03125
PCPG_M310	0.026087	0.0202703	0.0271493	0.0191083	0	0.0243902	0.0239521	0.0245232	0.0214067	0.0202703	0.0162162	0.0263158	0.0357143	0.0162602	0.0248963	0.0198413	0.0212766	0.0217391	0.0177515	1	0.0231214	0.0214286	0.0419162	0.0204082	0.0214286	0.021645	0.020979	0.0251256	0.0238095	0.0175439	0.0165746	0.0217391
PCPG_M312	0.0285714	0.0186916	0.025974	0.0263158	0.0253165	0.0266667	0	0.0229885	0.0229885	0.0273973	0.0142857	0.0193237	0.0340909	0.0289855	0.025974	0.0224719	0.0285714	0.027027	0.028169	1	0.0266667	0.0238095	0.0253165	0.027027	0	0.0142857	0.0267857	0.0266667	0.025974	0.0266667	0.027027	0.029703
PCPG_M324	0	0.0298507	0.0294118	0.0340909	0	0.0232558	0.028169	0.0325203	0.0266667	0.037037	0.0307692	0.0298507	0.0304569	0.025	0.0298507	0.030303	0	0.0273973	0.030303	1	0.0277778	0.0294118	0.0307692	0.0149254	0.0153846	0.027027	0.0151515	0.0204082	0	0.0285714	0.0110294	0.0215054
PCPG_M345	0.0416667	0.0416667	0.0454545	0.0454545	0	0.0454545	0	0.0434783	0.0357143	0	0.0434783	0.0238095	0	0.037037	0.0487805	0.0384615	0.0344828	0.0434783	0.0454545	1	0	0.0454545	0	0.0416667	0	0	0.0294118	0.0454545	0	0	0.0416667	0.04
PCPG_M346	0.0384615	0.0416667	0.04	0.0235294	0.0344828	0.0152672	0.0212766	0.0416667	0.0322581	0.0416667	0.0333333	0.0344828	0.0416667	0.0357143	0.0294118	0.04	0	0.0416667	0.0357143	1	0.0416667	0.04	0.037037	0.0465116	0	0.04	0.04	0.0344828	0	0.0416667	0.0327869	0.0416667
PCPG_M36	0.0394737	0.0243902	0.0240964	0.0350877	0.028169	0.0273973	0.0327869	0.019802	0.0461538	0.0172414	0.04	0.0481928	0.0289855	0.0361446	0.0338983	0.0333333	0.0338983	0.0272727	0	1	0.0405405	0.0333333	0.0357143	0.0365854	0.0285714	0.0357143	0.023622	0.0344828	0.047619	0.03125	0	0.0253165
PCPG_M462	0.0484581	0.030888	0.0307692	0.0277778	0.0234742	0.0208333	0.0271318	0.0232558	0.0285714	0.0238095	0.0334728	0.0336788	0.0283688	0.023622	0.0302013	0.0298507	0.029661	0.0266667	0.0297872	1	0.0197044	0.0381356	0.0375427	0.0304054	0.0252525	0.0434783	0.0428016	0.0273684	0.0257353	0.0277778	0.0325203	0.0291262
PCPG_M50	0.0190476	0.0275229	0.0204082	0.02	0	0.0212766	0.0206186	0.0194805	0.0223881	0.0229008	0.0208333	0.0392157	0.0272727	0.0229008	0.0254237	0.0288462	0.0210526	0.0294118	0.0181818	1	0.020202	0.0215827	0.0275229	0.03125	0.0285714	0.0330579	0.0267857	0.0216216	0.020202	0.0194175	0.0204082	0.0190476
PCPG_M53	0.0255319	0.0196078	0.0265487	0.0185185	0	0.0236686	0.023622	0.0241935	0.0210843	0.0200893	0.0157895	0.025641	0.0346821	0.016129	0.0243902	0.0194553	0.0205761	0.025	0.0172414	1	0.0224719	0.0206897	0.0406977	0.02	0.0207469	0.0211864	0.0204082	0.0245098	0.0231214	0.0170455	0.0193548	0.021164
PCPG_M54	0.0217391	0.0277778	0.0232558	0.0307692	0	0	0.038961	0.038835	0.043956	0.0298507	0.0390625	0.0217391	0.028169	0.027027	0.0277778	0.0410959	0.0322581	0.0153846	0.027027	1	0.0352941	0.0238095	0.025974	0.0149254	0.027972	0.0416667	0.0277778	0.0283019	0.0336134	0.0277778	0.04	0.0322581
PCPG_M56	0.0285714	0.0196078	0.0229885	0.0235294	0.0224719	0.0235294	0	0.0206186	0.0206186	0.0240964	0.0125	0	0.0306122	0.0253165	0.0288462	0.0240964	0.025	0.0267857	0.028777	1	0.0306122	0.0215827	0.0252101	0.0238095	0	0.0204082	0.03	0.0235294	0.0229885	0.0235294	0.0238095	0.027027
PCPG_M60	0.0172414	0.0217391	0.0178571	0.0227273	0.0263158	0.0232558	0.018018	0.0301205	0.0181818	0.024	0.0183486	0.018018	0.0248963	0.0136986	0.0239521	0.020979	0.017094	0.025641	0.0230769	1	0.0217391	0.0242424	0.0212766	0	0.0213904	0.0183486	0.0230769	0.0233333	0.025	0.0204499	0.0136519	0.02
PCPG_M63	0.0430108	0.0246914	0.0307692	0.0298507	0.0277778	0	0.027027	0.0425532	0.0442478	0.0273973	0.030303	0.031746	0.0275229	0.0289855	0.028169	0.0298507	0.03	0.025	0.0267857	1	0.036036	0.0246914	0.0253165	0.031746	0.0273973	0.0254237	0.0217391	0.0176678	0.0377358	0.0322581	0.0373832	0.031746
PCPG_M69	0.037037	0.0210526	0.0181818	0.0178571	0.0357143	0	0.0247934	0.0185185	0.03125	0.0307692	0.0181818	0	0.031746	0.0277778	0.0294118	0.037037	0.0204082	0.0185185	0	1	0.0229885	0.0185185	0.0322581	0.0273973	0.0333333	0.0273973	0	0.027027	0.0175439	0.0185185	0.0333333	0.0185185
PCPG_M73	0.025974	0.0185185	0.04	0.0322581	0	0.0333333	0.0178571	0.0238095	0.0338983	0.0185185	0.0254237	0.0188679	0.0181818	0	0.0194805	0.0377358	0.0377358	0.0238095	0.029703	1	0.0365854	0.0384615	0.0205479	0.0185185	0.0333333	0.0188679	0.0229885	0.0263158	0.0247934	0.0422535	0.0188679	0.0410959
PCPG_M74	0.0232558	0.0273438	0.025	0.0222222	0	0	0.0272727	0.037037	0.0425532	0.0338983	0.0192308	0.023622	0.031746	0.0222222	0.0224719	0.046875	0.0289855	0.0227273	0.0148148	1	0.0416667	0.0232558	0.0444444	0.0352941	0.0240964	0.0217391	0.0327869	0.024	0.0212766	0.0227273	0.0153846	0.0444444
PCPG_M751	0.0338983	0.04	0.0294118	0.04	0	0.0350877	0.0363636	0.0357143	0.0487805	0.0379747	0.0337079	0.0425532	0.0333333	0.0462963	0.0392157	0.037037	0.0322581	0.0333333	0.0338983	1	0.0344828	0.0357143	0.0357143	0.04	0.0344828	0.0357143	0.0196078	0.032967	0.0392157	0.0340909	0.019802	0.0416667
PCPG_M786	0.0208333	0.0253165	0.0212766	0	0	0.02	0.0212766	0.025974	0.0416667	0	0.0392157	0.0212766	0.025974	0.031746	0.0357143	0.0363636	0.0267857	0.0212766	0.0212766	1	0	0.0232558	0.0319149	0.0212766	0.0350877	0.0212766	0.0277778	0	0.0377358	0.0196078	0.030303	0.0212766
PCPG_M890	0.0212766	0.0225989	0.0165289	0.0253807	0.026616	0	0.0234375	0.0217391	0.0345912	0.0153846	0.025	0.0272953	0.0258065	0.0265306	0.0230769	0.026087	0.0211268	0.0230769	0.0337553	1	0.0205128	0.0162602	0.0168067	0.0240964	0	0.0212766	0.0300752	0.0179641	0.0168067	0.0258065	0.0242718	0.0294118
PCPG_M90	0.0378549	0.0414201	0.0272436	0.0265487	0.012931	0.0253165	0.0332326	0.0203252	0.0298507	0.0306122	0.0405904	0.0434783	0.0294985	0.0301205	0.0419847	0.0254545	0.0294985	0.0275229	0.0325733	1	0.0328947	0.0456274	0.0446097	0.0383481	0.0262009	0.0232558	0.0495868	0.0359712	0.0267062	0.0301624	0.012605	0.0257235
PCPG_M911	0.0392157	0.0359712	0.0365854	0.0462963	0.0444444	0.025	0.0297398	0.026087	0.049505	0.0496454	0.0483871	0.025	0.0205479	0.0357143	0.0267857	0.0291262	0.0336134	0.030303	0.0330579	1	0.0295203	0.0265487	0.0471698	0.0246914	0.0344828	0.03125	0.0449438	0.0261438	0.0412371	0.03125	0.0229885	0.0467836
PCPG_M92	0.0407524	0.02849	0.0382166	0.0226537	0.0162866	0.021028	0.0354767	0.0246479	0.037037	0.0236364	0.0357143	0.0332481	0.0272537	0.0208333	0.0303951	0.035	0.027439	0.0230263	0.0272277	1	0.0136054	0.0318302	0.0358852	0.0381679	0.0211268	0.0290698	0.0372493	0.026455	0.0240175	0.029703	0.0357143	0.0321637
PCPG_M944	0.0357143	0.0408163	0.0487805	0.0384615	0	0.03125	0.02	0.0392157	0.0266667	0.0289855	0.037037	0.0350877	0.0416667	0.023622	0.03125	0.0333333	0.0307692	0.0408163	0.0298507	1	0.0298507	0.0461538	0.0344828	0.0384615	0.0350877	0.0330579	0.02	0.0227273	0.0273973	0.0284091	0.02	0.038835
PCPG_M948	0.0333333	0.0294118	0.0416667	0.0344828	0.037037	0	0	0.0416667	0.0266667	0.0416667	0.0416667	0.0416667	0	0.0357143	0.0434783	0.0416667	0	0.0454545	0	1	0	0.0454545	0.04	0.0416667	0.0416667	0.0246914	0.0285714	0.0416667	0.037037	0.0434783	0.025	0.0168067
PCPG_M958	0.0347222	0.0336134	0.024735	0.0327869	0.027027	0.030303	0.0166667	0.0258621	0.0461538	0.0412371	0.029703	0.0344828	0.0442478	0.029703	0.0227273	0.03125	0.0153846	0.0220264	0.0319149	1	0.0294118	0.031746	0.0344828	0.0365854	0.0246914	0.028169	0.030303	0	0.024	0.0263158	0.027027	0.0258621
PCPG_M968	0.0327869	0.025	0.0372671	0.035461	0.028169	0.0338983	0.0363636	0.0298507	0.0350877	0.0188679	0.029703	0	0.0361446	0.0344828	0.0183486	0.0333333	0.0294118	0.0350877	0.0275229	1	0.0350877	0.031746	0.0384615	0.038961	0.0188679	0.027027	0.038835	0.0422535	0.027027	0.0363636	0.0246914	0.0461538
PCPG_M980	0.0285714	0.0234375	0.0301205	0.015873	0	0.0277778	0.0272109	0.0200573	0.023622	0.0234375	0.0181818	0.0230769	0.0405405	0.0163934	0.0238095	0.0171674	0.0247934	0.025	0.0201342	1	0.0215633	0.025	0.0405405	0.0174927	0.025	0.0188679	0.0233918	0.027933	0.0223881	0.0198675	0.0186335	0.0243902
PRAD_M1023	0.0384615	0.040404	0.0421053	0.0326087	0	0.0194175	0.0434783	0.0283688	0.0430108	0.0294118	0.0454545	0.0315315	0.032967	0.030303	0.0434783	0.0421053	0.0425532	0.040404	0.0337079	0.0350877	1	0.0337079	0.04	0.0416667	0.045977	0.0245399	0.0382166	0.0319149	0.0373832	0.0340909	0.0291262	0.0277778
PRAD_M1035	0.0327869	0.0344828	0.027027	0.0483871	0	0.0254237	0.0298507	0.031746	0.031746	0.0273973	0.031746	0.0461538	0.027027	0.0338983	0.0333333	0.0333333	0.0338983	0.0267857	0.03125	0	1	0.0333333	0.0307692	0.030303	0.0236967	0.0336134	0.0169492	0	0.015873	0.025974	0.0166667	0.0266667
PRAD_M11	0.0367347	0.0330579	0.0325581	0.0210526	0.0281124	0.015873	0.0437956	0.0269231	0.0236686	0.0189573	0.0358974	0.011976	0.020202	0.0245499	0.0329341	0.028	0.0282132	0.0376471	0.0429185	0.0393939	1	0.0451128	0.0251256	0.0288462	0.0388693	0.028436	0.0259067	0.0207254	0.024	0.0273224	0.0289256	0.0295858
PRAD_M1109	0.04	0.0347826	0.030303	0.03125	0	0.0363636	0.0306122	0.0306122	0.0384615	0.0333333	0.041958	0.0327869	0.0265487	0.0291971	0.0392157	0.0330579	0.0280374	0.0336134	0.0283019	0.0267857	1	0.0275862	0.0366972	0.030303	0.03125	0.0285714	0.0257732	0.0337838	0.0482759	0.029703	0.025641	0.027027
PRAD_M111	0.0362473	0.0363636	0.0362694	0.0235294	0.030837	0.019685	0.047619	0.0294118	0.0272109	0.021164	0.0344828	0.0128205	0.021645	0.0237288	0.0319489	0.0307018	0.0268456	0.0341463	0.0473934	0.038835	1	0.0491803	0.0245399	0.025	0.0342205	0.031746	0.0292398	0.0233918	0.0263158	0.0258065	0.0318182	0.0283912
PRAD_M1152	0.0247934	0.030888	0.031746	0.0220588	0.0254777	0.0197368	0.0416667	0.0254237	0.029703	0.027027	0.038835	0.0369004	0.025	0.0241935	0.0364964	0.034188	0.0258621	0.026178	0.0363636	0.0320513	1	0.0310078	0.0263158	0.0272109	0.028777	0.025641	0.0243902	0.026087	0.026178	0.0287356	0.0319149	0.0233918
PRAD_M1231	0.0322581	0.0338983	0.0240964	0.0266667	0.0327869	0.0243902	0.0266667	0.0322581	0.0294118	0.031746	0.0338983	0.025641	0.0322581	0.0307692	0.0365854	0.0294118	0.028169	0.031746	0.0352941	0.0238095	1	0.0246914	0.0243902	0.015873	0.0266667	0.034188	0.0232558	0.027027	0.0447761	0	0.0240964	0
PRAD_M1358	0.0288462	0.0330579	0.0366972	0.0252101	0.0285714	0.0222222	0.0472441	0.025	0.0324324	0.0297619	0.042328	0.0393701	0.025641	0.0255102	0.0416667	0.04	0.0254545	0.0287356	0.0405405	0.0344828	1	0.0357143	0.0285714	0.0307692	0.0327869	0.03	0.0283019	0.028169	0.029703	0.0205479	0.0350877	0.026087
PRAD_M1377	0.0350877	0.037037	0.025641	0.0285714	0.0357143	0.025974	0.0285714	0.0350877	0.031746	0.0344828	0.037037	0.0273973	0.0350877	0.0333333	0.038961	0.031746	0.030303	0.0344828	0.0375	0.0253165	1	0.0263158	0.025974	0	0.0285714	0.0265487	0.0246914	0.0289855	0.0240964	0	0.025641	0
PRAD_M161	0.0202703	0.0308642	0.0252101	0.0212766	0.0327869	0.0263158	0.02	0.0247934	0.0295203	0.0194175	0.0277778	0.0248447	0.0231214	0.0275229	0.0291262	0.0265487	0.0219298	0.0294118	0.0338983	0.0261438	1	0.0227273	0.0309278	0.0245902	0.0314465	0.029703	0.0327869	0.0283019	0.0263158	0.0208333	0.0280374	0.0258621
PRAD_M185	0.025641	0.029703	0.0380952	0.0298507	0.0275862	0.0263158	0.0265152	0.027027	0.0285714	0	0.0348837	0.0294118	0	0.0276243	0	0.03	0.0289855	0.0204082	0.0144578	0.0267857	1	0.025641	0.0289855	0	0.0243902	0.034965	0.0340909	0.028169	0.0319149	0.0222222	0	0
PRAD_M240	0.0211416	0.0334347	0.02	0.0270793	0.018595	0.0147368	0.0258065	0.0227273	0.0239726	0.0143198	0.0258398	0.0194805	0.0160183	0.0282318	0.0232558	0.0271429	0.0228245	0.0232172	0.0381194	0.0148305	1	0.00977995	0.0268987	0.00990099	0.012766	0.0232198	0.0365854	0.0358467	0.0183486	0.0226537	0.0260417	0.0210728
PRAD_M241	0.0196629	0.0192308	0.0227273	0.0213675	0.0181818	0.0171674	0.0221239	0.0208817	0.0097561	0.0144928	0.0222222	0.0172414	0.0218818	0.00956938	0.025	0.0183486	0.0222222	0.0243363	0.0172414	0.0145631	1	0.00947867	0.0241228	0.015748	0.0134529	0.0273224	0.0149813	0.022082	0.017316	0.0140845	0.0221893	0.0135747
PRAD_M243	0.0337079	0.0294118	0.0215827	0.0272727	0	0	0.0190476	0.0247934	0.025641	0.0186916	0.0215054	0.0222222	0	0.0224719	0.032967	0.0222222	0	0.0357143	0.0232558	0.0185185	1	0.0227273	0.019802	0.0208333	0.0107527	0.0202703	0.0192308	0	0.0186916	0.0280374	0.0206186	0
PRAD_M245	0.038961	0.0272315	0.0244957	0.0228426	0	0.0185676	0.0295455	0.0311526	0.0350554	0.0261682	0.034904	0.048913	0.0292398	0.0239163	0.0318021	0.0288248	0.0189873	0.0254958	0.0287648	0.0313199	1	0.0245902	0.0275424	0.0305344	0.0353982	0.0258398	0.0485934	0.0234234	0.0434783	0.0254958	0.0271132	0.0230263
PRAD_M25	0.0304878	0.0277778	0.0218978	0.0194175	0.0328947	0.0272727	0.0218978	0.0215827	0.03125	0.0197531	0.026455	0.0238095	0.0255319	0.0246575	0.0267857	0.0229008	0.0244898	0.025	0.0294118	0.0294118	1	0.02	0.026087	0.0254777	0.0282486	0.0252101	0.0298507	0.0260586	0.0305344	0.0189702	0.0258621	0.0223881
PRAD_M254	0.0375587	0.0246305	0.0344828	0.0246305	0.0139535	0.0323276	0.0372093	0.0356436	0.0246305	0.0296053	0.0365854	0.027027	0.02657	0.0353982	0.0315315	0.0348259	0.0351562	0.0434783	0.027451	0.0247934	1	0.0220264	0.030837	0.0425532	0.0227273	0.0271318	0.0310734	0.0307018	0.037037	0.0216049	0.0275	0.0287081
PRAD_M257	0.0198675	0.0273224	0.035	0.0186335	0.0153846	0	0.0232558	0.0184049	0.0213904	0.0189702	0.0207612	0.022082	0.0184049	0.0185185	0.021645	0.0234742	0.0266667	0.0397727	0.0259259	0.0244755	1	0.0224215	0.0125	0.017341	0.0245399	0.0230415	0.0230415	0.015873	0.0194553	0.0200803	0.0127389	0.0236686
PRAD_M265	0.0261438	0.0253165	0.0206186	0.0252101	0.029703	0.021978	0.020202	0.0190476	0.019802	0.0434783	0.0220588	0.0326087	0.0185185	0.0315789	0.0215054	0.0212766	0.029703	0.027027	0	0.0240964	1	0.0227273	0.0350877	0.0208333	0.0215054	0.0263158	0	0.0235849	0	0.0212766	0.0192308	0.03
PRAD_M283	0.0294118	0.0347003	0.0272727	0.0292887	0.0314286	0.0431779	0.0369318	0.0245232	0.0322581	0.0167785	0.039267	0.0430528	0.048218	0.031348	0.0419355	0.0315457	0.030303	0.038835	0.0309859	0.039801	1	0.0300926	0.0375	0.0369231	0.031746	0.0273973	0.0402576	0.0243161	0.0310559	0.0345821	0.0497018	0.0217391
PRAD_M288	0.0494845	0.0410959	0.0310881	0.028169	0.0151899	0.026087	0.0413386	0.0309091	0.032634	0.0326797	0.0357143	0.046875	0.0358974	0.0288248	0.0442105	0.0317073	0.0257732	0.0425532	0.0242718	0.0391705	1	0.0361446	0.0252525	0.0434783	0.0454545	0.0182768	0.0479042	0.0468966	0.042394	0.0291121	0.0345369	0.0196078
PRAD_M293	0.021164	0.0212766	0.0210526	0.0167364	0	0	0.0215517	0.0169492	0.0265487	0.0143541	0.019337	0.0179856	0.0191388	0.0285714	0.0205128	0.0153061	0.0208333	0.0162162	0.0172414	0.0185185	1	0.0106383	0.0230769	0.0168776	0.0309735	0.0277136	0.0157068	0.0168776	0.0199203	0.0157895	0.0154639	0.0149254
PRAD_M299	0.0306122	0.0238095	0.0222222	0.030303	0.0232558	0.0186916	0.03125	0.0229885	0.0241935	0.0344828	0.0254237	0.0307692	0.0229885	0.0251256	0.0280374	0.024	0.0229885	0.0227273	0.0272727	0.0212766	1	0.0227273	0.0352941	0.0269058	0.02	0.035461	0.021978	0.020202	0.0326087	0.0117647	0.0185185	0
PRAD_M330	0.0413793	0.019802	0.03125	0.0208333	0.0350877	0	0.03125	0.0408163	0.0416667	0.0338983	0.0416667	0.0384615	0.0434783	0.047619	0.0363636	0.0263158	0.0227273	0.0277778	0.0365854	0.030303	1	0.047619	0.037037	0.0243902	0.037037	0.0327869	0.0344828	0.047619	0.0344828	0.0238095	0.0465116	0.0487805
PRAD_M34	0.0218341	0.0263158	0.019305	0.0102041	0.0186916	0.0143541	0.0230179	0.024	0.0148515	0.0132743	0.0147783	0.0200803	0.0153061	0.0252101	0.0154639	0.0224215	0.0161943	0.021028	0.0227273	0.0202532	1	0.0152284	0.02267	0.0147059	0.0257235	0.0186916	0.0272	0.0244565	0.0215827	0.0221402	0.0148515	0.0199005
PRAD_M36	0.0416667	0.027027	0.0327381	0.0157895	0	0.0218182	0.0193906	0.0269231	0.0342466	0.02267	0.0240964	0.024911	0.03125	0.0322581	0.0282686	0.0196629	0.0215517	0.0379147	0.0247525	0.0259259	1	0.01983	0.0288714	0.0239852	0.0180505	0.0257511	0.0239044	0.019943	0.026087	0.0257143	0.0233161	0.026362
PRAD_M39	0.0289855	0.0241935	0.0294118	0.0338983	0.028169	0.0235294	0.0322581	0.0144231	0.0222222	0.0181818	0.0238095	0.025974	0.0491803	0.0222222	0.023622	0.0229885	0.0363636	0.0327869	0.028169	0.0298507	1	0.0461538	0.0357143	0	0	0.025	0	0	0.0350877	0.0188679	0.0333333	0.0210526
PRAD_M430	0.028169	0.0298507	0.027027	0.028169	0.0430108	0.0352941	0.028169	0.0326087	0.0348837	0.0266667	0.0285714	0.0266667	0.0285714	0.0285714	0.028169	0.0289855	0.0247934	0.027027	0.0449438	0.0322581	1	0.0291262	0.0441176	0.0322581	0.0305344	0.0337079	0.0322581	0.025641	0.0289855	0.026087	0.0347826	0
PRAD_M482	0.0185185	0.0208333	0.0315789	0.0210526	0.020202	0.0240964	0.0238095	0.0229008	0.0258621	0.0366972	0.0201005	0.0243902	0.0263158	0.0206186	0.0285714	0.0265487	0.0215054	0.021978	0.032	0.0208333	1	0.0196078	0.0188679	0.0212766	0.020202	0.0218978	0.0276243	0.0208333	0.0319149	0.019802	0	0.0243902
PRAD_M485	0.025	0.0235294	0.0232558	0.0275229	0	0	0	0.0366972	0.0338983	0.0289855	0.025	0.0294118	0.0298507	0.0273973	0.0246914	0.032967	0.0298507	0.030303	0.0294118	0.0230769	1	0.0172414	0.038961	0	0.0194175	0.028169	0.0277778	0.0322581	0.0298507	0.0333333	0	0.0172414
PRAD_M487	0.0319149	0.0434783	0.0285714	0.020202	0.028169	0	0.0289855	0.0309278	0.0277778	0.0240964	0	0.0223881	0.0243902	0.0272109	0.0142857	0.0298507	0	0.0340909	0.0253165	0.0235294	1	0.0147059	0.017341	0	0	0.027027	0.025	0.0289855	0.0298507	0.038961	0.0366972	0.030303
PRAD_M493	0.0214286	0.0204082	0	0.0201342	0.0186335	0.0204082	0.0212766	0.0201342	0.0169492	0.0165289	0.0227273	0.0205479	0.0243902	0.0162602	0	0.0272109	0.0230769	0.0192308	0.027027	0.0186335	1	0	0.0227273	0.0193798	0.0220588	0.0192308	0.0166667	0.025974	0.015873	0	0.0225564	0.0169492
PRAD_M548	0.0294118	0.0263158	0.0271318	0.0250696	0	0.0204678	0.027027	0.0242215	0.0310345	0.028	0.0319149	0.0477612	0.0292208	0.0233333	0.0362903	0.0263158	0.0213523	0.0283019	0.0305755	0.0289855	1	0.0271903	0.0297483	0.0262009	0.0326797	0.016129	0.047486	0.0233333	0.046875	0.0283019	0.0252525	0.0260223
PRAD_M562	0.0217391	0.0314136	0.0240964	0.0128205	0	0.0192308	0.0229885	0.0184332	0.0238095	0.0210084	0.029703	0.0412371	0.0240964	0.0304569	0.0284698	0.0326797	0.0263158	0.0353982	0.0268817	0.0222222	1	0.0196078	0.0289017	0.0321637	0.0255102	0.0186335	0.0255319	0.0271739	0.0330789	0.0176471	0.0246914	0.0189873
PRAD_M607	0.0253165	0.0288462	0.032967	0.0375	0	0.0236686	0.043956	0.0365854	0.0384615	0.021978	0.0246914	0.0361446	0.0217391	0.037037	0.038961	0.0357143	0.0365854	0.0408163	0.0272727	0	1	0.025641	0.0253165	0.0326087	0.0444444	0.0291971	0.0291971	0.0243902	0.038961	0.0365854	0.0203046	0.0337079
PRAD_M673	0.0272109	0.0375	0.0263158	0.026178	0	0.0320513	0.030303	0.0277778	0.0363636	0.0239521	0.0315789	0.0236686	0.0225989	0.0331126	0.0352113	0.0361446	0.0247934	0.030303	0.0246914	0.021645	1	0.0297872	0.025641	0.0275862	0.028169	0.027907	0.0212766	0.0272109	0.0364583	0.0254777	0.0182927	0.0254777
PRAD_M705	0.0454545	0.037037	0.0434783	0.0434783	0.0357143	0.04	0.047619	0	0.0434783	0.04	0.0416667	0.037037	0.0434783	0.0206186	0.04	0.0454545	0.0416667	0.0434783	0.0434783	0.0434783	1	0.0434783	0.0416667	0	0.0416667	0	0.04	0	0.0357143	0.0416667	0.0434783	0.0454545
PRAD_M74	0.04	0.0222222	0.0384615	0	0.0222222	0.0222222	0.0222222	0.0234375	0.0246914	0.0217391	0	0.0204082	0	0.0222222	0.0289855	0.037037	0.0217391	0.037037	0.0340909	0.0434783	1	0.0229885	0.0263158	0.0434783	0	0.0363636	0	0.0196078	0.0277778	0.04	0.00954198	0.0322581
PRAD_M751	0.0430108	0.0285714	0.0344828	0.0166667	0	0	0.0151515	0.0344828	0.030303	0.0307692	0.0229885	0.020202	0.0361446	0.0289855	0.0277778	0.0333333	0.0333333	0.0289855	0.0307692	0.0307692	1	0.0307692	0.03125	0.0266667	0	0.0307692	0.0422535	0	0.0294118	0.0285714	0	0.0266667
PRAD_M768	0.0322581	0.0253165	0.0210526	0.0319149	0.0246914	0.0196078	0.0210526	0.0243902	0.0252101	0.0365854	0.0265487	0	0.0243902	0.0257732	0.0294118	0.025	0.021978	0.0240964	0.0285714	0.0197368	1	0.0240964	0.0205479	0	0.0210526	0.0367647	0.0232558	0.0212766	0.0344828	0.0125	0.0194175	0
PRAD_M77	0.0271739	0.030303	0.0275229	0.0376344	0.0294118	0.0267857	0.0289256	0.03125	0.0265487	0.0222222	0.0232558	0.026087	0.0212766	0.029703	0.0413223	0.0377358	0.0283019	0.0355556	0.0423729	0.0243902	1	0.0465116	0.0254777	0.037037	0.037037	0.0330579	0.025641	0.0251572	0.037037	0.032	0.0222222	0.025641
PRAD_M8	0.0282486	0.0432191	0.0268817	0.0132979	0.0192308	0.018595	0.0237762	0.0255102	0.019305	0.0237718	0.0245536	0.0242718	0.0296412	0.0309677	0.019802	0.0366089	0.0114943	0.020654	0.030479	0.0224949	1	0.0242718	0.020979	0.0246433	0.0211268	0.0150754	0.0330396	0.0277778	0.0265306	0.0222222	0.0223464	0.0159574
PRAD_M873	0.04	0.0434783	0.04	0	0.0416667	0.0454545	0.0416667	0.0232558	0.04	0.0416667	0.037037	0.0344828	0.027027	0.0454545	0.04	0.0416667	0.0357143	0.0416667	0	0.0357143	1	0	0.0416667	0	0.0344828	0.0434783	0.0416667	0	0.0416667	0	0	0.0454545
PRAD_M876	0.0193548	0.021978	0.0277778	0.0227273	0.0217391	0.0251572	0.0252101	0.0241935	0.0210526	0.0392157	0.0208333	0.0258621	0.0280374	0.0222222	0.0306122	0.0283019	0.021978	0.0238095	0.0301205	0.0224719	1	0.0210526	0.020202	0.0229885	0.0217391	0.0230769	0.0287356	0.0224719	0.0344828	0.0212766	0	0.0258621
PRAD_M885	0.037037	0.0344828	0.0384615	0.037037	0	0	0.0333333	0	0	0.0392157	0.0277778	0	0	0.0465116	0.025	0.0344828	0.037037	0.0454545	0.0285714	0.0333333	1	0	0.03125	0.037037	0.0322581	0	0.0344828	0.0322581	0.0384615	0.0357143	0	0.0384615
PRAD_M887	0.04	0.0384615	0.0416667	0.0434783	0.0416667	0.0416667	0.0357143	0	0.030303	0.04	0.0434783	0.0285714	0.0434783	0.0434783	0.0416667	0.0434783	0.037037	0.0434783	0.03125	0	1	0.0285714	0	0.0357143	0	0.027027	0.0416667	0	0	0.0232558	0.0434783	0.0322581
PRAD_M888	0.026087	0.0232558	0	0.0232558	0	0	0.0280374	0.0208333	0.0153846	0	0.023622	0.0267857	0.0291262	0.0224719	0	0.0353982	0.0217391	0.0208333	0.026087	0.023622	1	0	0.0228571	0.0227273	0.0172414	0	0	0.0218978	0.0215054	0	0.030303	0.0238095
PRAD_M98	0.0272953	0.0252708	0.023913	0.0143541	0.0197628	0.019774	0.0248963	0.0188679	0.0222222	0.0097561	0.0197368	0.0245399	0.0264386	0.0224033	0.0242215	0.0278481	0.0138889	0.0221729	0.026643	0.0272727	1	0.0203666	0.0218069	0.020155	0.0204082	0.0140845	0.0369231	0.0393013	0.0220386	0.0181818	0.02457	0.017094
READ_M1568	0.0363636	0.021978	0.0243902	0.0327869	0.0375	0.029703	0.0350877	0.0350877	0.0169492	0	0.0229885	0.0235294	0.021978	0.03125	0.0344828	0.028169	0.0172414	0.0338983	0.0333333	0.0327869	0.0327869	1	0.0327869	0.0333333	0.0298507	0.0300752	0.027027	0.030303	0.0294118	0.0283019	0.0175439	0.0240964
READ_M1638	0.0352941	0.030303	0.0408163	0.0253165	0	0	0.0392157	0.0238095	0.0384615	0.0294118	0.0263158	0.0454545	0.0125786	0.0465116	0.0350877	0.0344828	0.0238095	0.0434783	0.0487805	0.0227273	0.0232558	1	0.0487805	0.03125	0.0425532	0.0285714	0	0.047619	0.0454545	0.04	0.0487805	0.0434783
READ_M171	0.0300752	0	0.025	0.025	0.0363636	0	0.0307692	0.025	0.025	0.0263158	0.0238095	0.025641	0	0.0377358	0.025974	0.0307692	0.025641	0.0379747	0.0487805	0.03125	0.0277778	1	0	0.0224719	0.0217391	0.0217391	0.0185185	0.025641	0.025641	0.0263158	0.025641	0.025641
READ_M802	0.0384615	0.047619	0.04	0.0416667	0.0151515	0.0416667	0.0384615	0.0357143	0.0434783	0.0333333	0.0454545	0.04	0.0434783	0.037037	0.047619	0.0454545	0.0454545	0.0434783	0.0294118	0	0.0454545	1	0.0416667	0.0434783	0.030303	0.04	0.0454545	0.0322581	0.0322581	0.0333333	0.0416667	0.0454545
READ_M940	0.0344828	0.032967	0.030303	0.025	0.0333333	0.0330579	0.025641	0.025641	0.0322581	0.025641	0.0185185	0.0337079	0.0277778	0.0280374	0.0285714	0.0379747	0.0238095	0.0265487	0.0246914	0.0263158	0.0294118	1	0.038961	0.027027	0.0263158	0.0326797	0.0210526	0.0271186	0.0361446	0.025	0.0205479	0.0234375
SARC_M1019	0.0465116	0.030303	0.0298507	0.0243902	0.0253165	0.0235294	0.0275862	0.0412371	0.0423729	0.025	0.0280374	0.0384615	0.025	0.0294118	0.0344828	0.0243902	0.025641	0.0338983	0.0272727	0.0298507	0.0288462	0.0337079	1	0.0357143	0	0.0319149	0.0266667	0.030303	0.0344828	0.0243902	0.0238095	0.0246305
SARC_M1109	0.0238908	0.0391198	0.027027	0.0353982	0.0306407	0.0294118	0.0297619	0.0253165	0.0294118	0.026455	0.047619	0.0179641	0.0218579	0.0321489	0.0372881	0.0265781	0.02	0.0304183	0.0380623	0.0349345	0.0258065	0.0264901	1	0.0263158	0.045977	0.0353535	0.04	0.0255319	0.0440252	0.0213675	0.0360656	0.0397351
SARC_M1149	0.0243902	0.0307692	0.0243902	0.0240964	0.0185185	0.024	0.0322581	0.030303	0.0347826	0.0406504	0.0241935	0.0243902	0.0247934	0.0192308	0.028777	0.0347826	0.036036	0.0361446	0.0271739	0.0353982	0.0347826	0.0229885	1	0.0196078	0.026087	0.0291262	0.0449438	0	0.031746	0.0305344	0.0243902	0.0348837
SARC_M1170	0.0229885	0.0265487	0.037594	0.0232558	0.0273973	0.0232558	0.026087	0.021978	0.0353982	0.0294118	0.0252101	0.029703	0.024	0.0380952	0.0408163	0.026087	0.03125	0.0226244	0.025641	0.0314961	0.0267857	0.0222222	1	0.0217391	0.0235294	0.0224719	0.0254237	0.0353982	0.0294118	0.0227273	0.0444444	0.02
SARC_M268	0.0338983	0.042735	0.0329457	0.0451128	0.0245902	0.028	0.0291262	0.0397351	0.0387597	0.0251256	0.0252101	0.0324074	0.025	0.0384615	0.0266272	0.035461	0.0486111	0.0327869	0.0287081	0.0344828	0.0393701	0.0252101	1	0.04	0.0283688	0.0227273	0.0283688	0.0347826	0.0361446	0.046875	0.0320513	0.0271739
SARC_M269	0.0266667	0.0231884	0.03	0.031348	0.0119048	0.0195122	0.0233645	0.0205128	0.0222222	0.0169492	0.0163934	0.0248963	0.0225225	0.0202247	0.0183727	0.0292398	0.0215054	0.0324826	0.0188088	0.0277778	0.0170213	0.0225225	1	0.0247748	0.0257732	0.02	0.0284091	0.0240385	0.0274725	0.0251046	0	0.0225564
SARC_M301	0.024024	0.0389344	0.0416667	0.015625	0.0297872	0	0.024	0.0334928	0.0223368	0.0227273	0.0229885	0.0239234	0.0237389	0.0274725	0.0301205	0.0225989	0.025974	0.0342298	0.0252809	0.0277778	0.0272374	0.0114943	1	0.0296296	0.0211864	0.0309051	0.0163934	0.0224719	0.025974	0.0298507	0.021978	0.0213904
SARC_M304	0.0442623	0.0371257	0.0410959	0.0253731	0.0332447	0.0280811	0.0383562	0.030837	0.0425824	0.0296774	0.0330368	0.0180995	0.0189983	0.0244161	0.0257787	0.0451542	0.0251572	0.0290237	0.04125	0.0304094	0.0358744	0.0475638	1	0.0182421	0.0488166	0.016835	0.0456919	0.0205479	0.0218182	0.0223979	0.0272989	0.0126812
SARC_M344	0.030303	0.03125	0.0229885	0	0.0235294	0.0222222	0.0275229	0.0327869	0.0240964	0.0294118	0.0319149	0.0298507	0.0117647	0.0307692	0.034188	0.03125	0.027027	0.0338983	0.0327869	0.030303	0.0294118	0.0333333	1	0.03125	0.03125	0	0.0384615	0.027027	0.0416667	0.0333333	0.0291262	0.0361446
SARC_M361	0.0460526	0.030837	0.030837	0.0235849	0.037037	0.0212766	0.021978	0.0347222	0.0352941	0.0232558	0.0266667	0.0230769	0.030303	0.0296296	0.0254237	0.0438596	0.0338983	0.0269231	0.028777	0.0247934	0.0266667	0.0238095	1	0.0268817	0.0353982	0.0282486	0.0185759	0.0222222	0.0322581	0.01875	0.0181818	0.0204082
SARC_M362	0.0412371	0.0272727	0.0275862	0.0223881	0.0222222	0.0208333	0.0315789	0.037037	0.0391061	0.025	0.0254237	0.0347826	0.028777	0.028169	0.0310078	0.0215054	0.0234375	0.0311526	0.0247934	0.0275862	0.026087	0.03	1	0.0315789	0	0.03	0.0248447	0.0342857	0.0320513	0.0215054	0.0210526	0.03125
SARC_M375	0.0263158	0.0378788	0.0197368	0.0206897	0.023622	0.02	0.0167131	0.0230769	0.0296736	0.0141844	0.0431655	0.0173913	0.0304878	0.0274725	0.0223464	0.0238095	0.0307692	0.0318182	0.0213904	0.0186916	0.0263158	0.0238095	1	0.0203046	0.0196078	0.0222222	0.0290698	0.0205479	0.023622	0.015748	0.0231481	0.015625
SARC_M38	0.0278746	0.0479042	0.0352423	0.0148515	0.0186916	0.0366667	0.026764	0.0357143	0.0376569	0.0358566	0.0304183	0.0197044	0.0333333	0.0358209	0.0307263	0.0381471	0.0310078	0.0298507	0.0380228	0.037037	0.0369515	0.0199557	1	0.02	0.0262009	0.0235849	0.0283019	0.0253968	0.0384615	0.0295203	0.0247253	0.0225225
SARC_M401	0.0203046	0.0331492	0.04	0.0208333	0.0224215	0.0326531	0.0264901	0.0379747	0.028777	0.0284091	0.0285714	0.0275862	0.0350877	0.0359281	0.0262009	0.0487805	0.04	0.0392157	0.0452489	0.0277778	0.0350877	0.0223881	1	0.0251572	0.0213904	0.0324675	0.028169	0.0193548	0.0394737	0.029703	0.0250896	0.0304878
SARC_M806	0.0357143	0.049505	0.0340909	0.0423729	0.0283019	0.0299145	0.0315789	0.0444444	0.0442478	0.0273973	0.0291262	0.0357143	0.0288462	0.0368098	0.0279503	0.04	0.03207	0.0377358	0.0257732	0.0379747	0.045045	0.0277778	1	0.0447761	0.032	0.0258621	0.032	0.040404	0.030303	0.0333333	0.0283688	0.030303
SARC_M867	0.0273973	0.0348837	0.0461538	0.0266667	0.0338983	0	0.0333333	0.0265487	0.0215054	0.0263158	0.03125	0.0258621	0.0225989	0.0183486	0.0215054	0.0333333	0.0243902	0.0454545	0.0375	0.0333333	0.0232558	0.040404	1	0.0379747	0.0333333	0.0306122	0.0188679	0.0266667	0.0238095	0.0294118	0.029703	0.0285714
SARC_M889	0.025641	0.037037	0.0454545	0.0168539	0.027027	0	0.0251256	0.0358974	0.0225564	0.0246914	0.025	0.025641	0.0216049	0.0297619	0.0314465	0.0235294	0.0251572	0.035443	0.0233236	0.029703	0.0259481	0.0125	1	0.0246305	0.0204082	0.0318907	0.0177515	0.0233918	0.0276498	0.0320856	0.0224719	0.0231214
SARC_M904	0.0285714	0.0233918	0.0285714	0.037037	0	0.0298507	0.0322581	0.025641	0.0291262	0.0285714	0.028169	0.0266667	0.0291262	0.0164835	0.0283019	0.0210526	0.0422535	0.0263158	0.0243902	0.0275862	0.0238095	0.0138889	1	0.0240964	0.0289855	0.0140845	0.027027	0.0185185	0.0227273	0.0357143	0.0326087	0.0344828
SKCM_M1005	0	0.0434783	0.0454545	0.0454545	0	0	0.0454545	0.0434783	0.0222222	0.0384615	0	0.047619	0.04	0	0.0434783	0.047619	0.047619	0.0454545	0.047619	0	0.0357143	0.0416667	0.047619	1	0.025641	0	0.037037	0.0416667	0.0434783	0.0454545	0.0416667	0.047619
SKCM_M107	0.0342466	0.0274725	0.023622	0.0231214	0.0219298	0.0205479	0.0196078	0.0368421	0.025	0.0178571	0.0207254	0.0201342	0.03125	0.0254237	0.025	0.0193237	0.0236686	0.0315789	0.0304878	0.0278746	0.0333333	0.025974	0.020979	1	0.0227273	0.0254237	0.0205479	0.0204082	0.0234375	0.0238095	0.0243902	0.0173913
SKCM_M110	0.0454545	0.0322581	0.0280374	0.04	0.0192308	0.04	0.0238095	0.046875	0.04	0.0338983	0.0408163	0.04	0.0375	0.0338983	0.0441176	0.0357143	0.028169	0.0363636	0.0344828	0.0338983	0.02	0.032967	0.0215054	1	0.0185185	0.0350877	0.0192308	0.0104603	0.0298507	0.0327869	0.0338983	0.037037
SKCM_M130	0.0327869	0.0307692	0.0434783	0.028169	0.0217391	0.0322581	0	0.0273973	0.031746	0.0289855	0.0294118	0.0212766	0.016129	0.026738	0.0183486	0.0298507	0.0307692	0.0441176	0.0298507	0.03125	0	0.0344828	0.0285714	1	0.0327869	0.0298507	0	0	0.031746	0.0253165	0.020202	0.0267857
SKCM_M133	0.018018	0.0212766	0.0277778	0.0212766	0.0212766	0.0275229	0.0322581	0.0357143	0.027027	0.0243902	0.0227273	0.0196078	0.0229008	0.0243902	0.0214286	0.0212766	0.0322581	0.0210526	0.0234375	0.0230769	0.0183486	0.0212766	0.0307692	1	0.0215054	0.0211268	0.02	0.0222222	0.024	0.0188679	0.0275229	0.0298507
SKCM_M142	0.0441176	0.028169	0.032967	0.0289855	0.0289855	0.0405405	0.0285714	0.031746	0.0232558	0.037037	0.0416667	0.0166667	0.028169	0.0285714	0.0322581	0.046875	0.0289855	0.03	0.0253165	0.0247934	0.0240964	0.0307692	0.0327869	1	0.0217391	0.027027	0.0338983	0.031746	0.0318182	0.0333333	0.0238095	0.0416667
SKCM_M148	0.0215054	0.020202	0.0227273	0.0229885	0.0309278	0.0235294	0.0215054	0.0277778	0.0363636	0.0212766	0.0217391	0.025641	0.024	0.0227273	0.0347826	0.0212766	0.0238095	0.0353982	0.0322581	0.024	0.0344828	0.0215054	0.0263158	1	0.0206186	0.0215054	0.0314961	0	0.0227273	0.0223881	0.030303	0.0235294
SKCM_M149	0.0434783	0.025641	0.030303	0.0344828	0.0208333	0.0208333	0.0425532	0.0212766	0.0307692	0.0229885	0.032967	0.025	0.0377358	0.0234375	0.0253165	0.0375	0.037037	0.0333333	0.0243902	0.0307692	0.0309278	0.0208333	0.0408163	1	0.0344828	0.0298507	0.0252101	0	0.0408163	0.0266667	0.0363636	0.0289855
SKCM_M153	0.04	0.0227273	0.025	0.0243902	0.0333333	0.0235294	0.0487805	0.0243902	0.025	0.0121951	0.027027	0.0232558	0.025	0.0434783	0.0232558	0.0357143	0.025	0.025	0.0487805	0.0243902	0.0408163	0.0222222	0.0243902	1	0.0243902	0	0.025	0	0.0208333	0.0465116	0.0243902	0
SKCM_M157	0.03125	0.0263158	0.0172414	0.0338983	0.03	0.031746	0.0169492	0.0225564	0.0273973	0.030303	0.0169492	0.0298507	0.0327869	0.0288462	0.0327869	0.0227273	0.0206186	0.025974	0.0175439	0.03125	0	0.0163934	0.025641	1	0.0247934	0.0333333	0.0357143	0.03125	0.027027	0.0175439	0.0322581	0.0333333
SKCM_M1598	0.0434783	0.0454545	0.0357143	0.0434783	0.0416667	0.0454545	0	0.0384615	0.0434783	0.0416667	0.04	0.03125	0.0384615	0.0384615	0.037037	0.0333333	0.0384615	0.0434783	0.0454545	0.0434783	0.04	0.0454545	0.0322581	1	0.0434783	0	0.04	0.04	0	0.0454545	0.0416667	0.04
SKCM_M160	0.0333333	0.0333333	0.0285714	0.0333333	0.0333333	0.0344828	0.0333333	0.0322581	0.0344828	0.0322581	0.0444444	0.0322581	0.0392157	0.0344828	0.027027	0.0454545	0.0294118	0.0344828	0.047619	0.0344828	0.0294118	0.0322581	0.0344828	1	0.0333333	0.0333333	0.0333333	0.0344828	0.0322581	0.0333333	0.0222222	0.0350877
SKCM_M213	0.0291262	0.0338983	0.0319149	0.0238095	0.025	0	0.0233645	0.0245399	0.0246305	0.0243902	0.0232558	0.0245902	0.0413223	0.0272727	0.0368098	0.0327273	0.0264901	0.0244898	0.0230769	0.025	0.024	0.0292683	0.039604	1	0.020202	0.0283019	0.034188	0.0338983	0.0210526	0.0208333	0.0482759	0.0215827
SKCM_M221	0.0357143	0.0454545	0.0416667	0.047619	0	0	0.025	0.04	0.0454545	0.0285714	0.0444444	0.0344828	0.0294118	0.0333333	0.0434783	0.0384615	0.0384615	0	0.037037	0.0434783	0.0454545	0.025	0.0357143	1	0.0454545	0	0.0357143	0.025	0	0.030303	0.0416667	0.0454545
SKCM_M588	0.0350877	0.0365854	0.0319149	0.0212766	0.0263158	0.021978	0.0204082	0.0446429	0.0277778	0.0202703	0.025	0.0227273	0.03125	0.0352941	0.027027	0.0246914	0.0258065	0.0382166	0.0353982	0.027451	0.0336134	0.0245902	0.0272727	1	0.0232558	0.0232558	0	0.0263158	0.0315789	0.0322581	0.0258621	0.0243902
SKCM_M654	0.031746	0.0434783	0.0327869	0.0322581	0.0416667	0.0322581	0.0338983	0.0461538	0.0416667	0.031746	0.0277778	0.037037	0.0361446	0.0416667	0.0326087	0.0434783	0.0350877	0.0425532	0.0294118	0.0365854	0.0294118	0.0434783	0.0408163	1	0.0444444	0	0.0333333	0.0357143	0.025641	0.03125	0.0322581	0.0285714
SKCM_M707	0.0363636	0.0333333	0.0238095	0.0465116	0.0357143	0.0243902	0.0212766	0.0183486	0.0350877	0.0344828	0.0232558	0.0243902	0.0243902	0.0357143	0.0222222	0.0238095	0.0322581	0.0243902	0	0.0416667	0	0.0238095	0.0322581	1	0.0285714	0.0454545	0.0444444	0.0243902	0.0280374	0.0243902	0.0434783	0.0454545
SKCM_M87	0.0298507	0.02	0.0189873	0.0204082	0.0205761	0.0150376	0.0261438	0.0192308	0.0189873	0.0217391	0.027972	0.0211268	0.0258065	0.0220588	0.0283019	0.0253456	0.0193548	0.0273438	0.0217391	0.0283688	0.0211082	0.0151515	0.0465116	1	0.0153846	0.0212766	0.0266667	0.0148148	0.0272109	0.0245399	0.0375	0.0232558
STAD_M1155	0.0294118	0.0205479	0.0285714	0.0222222	0.0251572	0.0166667	0.0340909	0.028169	0.021978	0.0222222	0.0344828	0.0430108	0.0232558	0.0336134	0.0361446	0.0247934	0.0231481	0.0234375	0.0473373	0.0241935	0.0321101	0.03125	0.0315789	0.0285714	1	0.0229008	0.0222222	0	0.0309278	0.0357143	0.019802	0.0212766
STAD_M194	0.0437158	0.0384615	0.0230769	0.0357143	0.0361991	0.0330579	0.0470588	0.0296296	0.0322581	0.0352941	0.0344828	0.0261438	0.0222222	0.03125	0.0340136	0.0457516	0.0324675	0.03125	0.028436	0.029304	0.0428571	0.0375	0.0254237	0.0230769	1	0.0234375	0.0377358	0.019802	0.0222222	0.027027	0.0182927	0.0230769
STAD_M195	0.025641	0.0343137	0.0328947	0.0135135	0.0409091	0.0224215	0.0408163	0.0235294	0.0376569	0.0185185	0.0245399	0.0210084	0.0273973	0.0186335	0.0342857	0.0297398	0.0342466	0.0268456	0.0360825	0.0239234	0.0227273	0.029304	0.0346821	0.0308057	1	0.0243161	0.0233333	0.0198675	0.0271493	0.0295858	0.0212121	0.012987
STAD_M630	0.015625	0.0344828	0.03125	0.0333333	0	0	0.0434783	0.03125	0	0.0357143	0.0333333	0.0277778	0	0.0333333	0.0277778	0.025641	0.037037	0.0294118	0.0208333	0.0333333	0.0344828	0.0232558	0.0357143	0.0384615	1	0.0232558	0	0	0	0.0294118	0	0.0384615
STAD_M686	0.0241546	0.0230769	0.0307692	0.0163934	0.021021	0.0308642	0.0266667	0.0246305	0.0212766	0.0227273	0.0338983	0.032	0.0169492	0.0333333	0.026087	0.0326797	0.0242915	0.0349345	0.039801	0.0214286	0.0321285	0.0264901	0.025	0.0243902	1	0.0188679	0.0201342	0	0.0299401	0.0347826	0.017094	0.0169492
TGCT_M106	0.0131148	0.0235294	0.0172911	0.0190024	0.0117994	0.015674	0.0135135	0.0207101	0.0206612	0.0118694	0.0267062	0.0204842	0.015015	0.0208062	0.0191898	0.0172911	0.015873	0.0256881	0.0133779	0.0151057	0.0294118	0.0175	0.0180995	0.013245	0.0155763	1	0.00931677	0.0264993	0.0131148	0.0119403	0.0247396	0.0211132
TGCT_M110	0.0305344	0.0336134	0.0314961	0.0272727	0	0.0387597	0.0265487	0.0451613	0.0362319	0.0247934	0.0283688	0.0205479	0.0269231	0.0210526	0.0243161	0.0441176	0.0291262	0.0451128	0.0253807	0.0254237	0.0296296	0.0294118	0.0320856	0.024	0.0420168	1	0.0189394	0.0225564	0.034188	0.027027	0.0162602	0.0183486
TGCT_M1103	0.0289855	0.0215827	0.0310078	0.0227273	0.0229885	0.0189873	0.0185185	0.01875	0.016129	0.0191083	0.0331754	0.02	0.0220588	0.0238095	0.027933	0.028436	0.0362319	0.0360825	0.015873	0.0215827	0.0214286	0.0273973	0.0241935	0.0208333	0.021645	1	0	0	0.0155039	0.0208333	0.0222222	0.0153846
TGCT_M114	0.0235294	0.0227273	0.0212014	0.0200803	0.0235294	0.0221402	0.0240964	0.0189394	0.0179372	0.0253165	0.0238095	0.0241379	0.0136986	0.0203488	0.021978	0.0204082	0.0226244	0.0252708	0.016129	0.0135135	0.0206022	0.0184332	0.0194175	0.0176991	0.0243902	1	0.0138889	0.00966184	0.0169492	0.0280702	0.0182648	0.0175439
TGCT_M1164	0.0315789	0.0208333	0.0326531	0.0344828	0.0236686	0.027027	0.047619	0.025	0.0421053	0.026087	0.0344828	0	0.0243902	0.029703	0.0458716	0.0342466	0.0288462	0.0277778	0.0422535	0.0263158	0.0307018	0.0286885	0.0236686	0.0273973	0.0357143	1	0.0428571	0.0337079	0.0379747	0.0322581	0.025641	0.030303
TGCT_M1175	0.0258065	0.026178	0.0241935	0.0234899	0.0253807	0.0220588	0.0225564	0.0254237	0.0327869	0.016129	0.0220588	0.0195599	0.0253165	0.0294118	0.0316456	0.0236967	0.0234375	0.0255102	0.0225564	0.0305344	0.0251046	0.018797	0.0252525	0.0252101	0.0161943	1	0.021322	0.028777	0.0305344	0.0325203	0.0277778	0.0227273
TGCT_M1192	0.0272109	0.038835	0.027972	0.0210526	0.0245902	0.0224719	0.025641	0.026087	0.0219178	0.0272727	0.0338983	0.0322581	0.0266667	0.0347222	0.0294118	0.0298507	0.0319149	0.0232558	0.0337838	0.0242424	0.0212014	0.0214067	0.0309278	0.024	0.0362319	1	0.026087	0.025	0.0285714	0.020202	0.0377358	0.0258065
TGCT_M1193	0.0211268	0.019802	0.0438596	0.042735	0.0193548	0.0225564	0.0210084	0.0230769	0.0288462	0.024	0.0163934	0.0220588	0.0211268	0.024	0.0266667	0.029703	0.02	0.0344828	0.0234375	0.0232558	0.034965	0.0275229	0.046729	0.0192308	0.019802	1	0.0236686	0.0186916	0.0374332	0.0277778	0	0
TGCT_M1214	0.0465116	0.0384615	0.0333333	0.0344828	0.0223881	0.04	0.0240964	0.04	0.0405405	0.037037	0.03125	0.0384615	0.0322581	0	0.037037	0.0333333	0	0.025974	0.0350877	0	0.0384615	0	0.04	0.04	0.0309278	1	0.04	0.04	0.0217391	0.0333333	0	0
TGCT_M1216	0.0377358	0.023622	0.0294118	0.0222222	0	0.0323625	0.0340909	0.0296296	0.0276243	0.0326087	0.0353982	0.028169	0.0215054	0.0217391	0.0357143	0.0326087	0.0217391	0.0217391	0.0291971	0.0335196	0.0327869	0.0340909	0.0314465	0.03	0.0263158	1	0.0309278	0.0247934	0.0362903	0.0337079	0.0296296	0.0227273
TGCT_M1227	0.0280374	0.0315315	0.0342466	0.0240964	0.0337079	0.0197368	0.0307692	0.0337079	0.0405405	0.0326087	0.0326087	0.029703	0.0222222	0.0240964	0.0232558	0.0380623	0.0227273	0.037037	0.0294118	0.0240964	0.0275229	0.026178	0.0218341	0.0243902	0.027027	1	0.035503	0.029703	0.032	0.0352941	0.0403587	0.0243902
TGCT_M1233	0.0231481	0.0291667	0.0201613	0.0146341	0.00966184	0.018315	0.0240385	0.00961538	0.0212766	0.0152672	0.019084	0.0143541	0.0263158	0.0183486	0.0169492	0.0225	0.0186916	0.0223642	0.0192308	0.0207612	0.0218579	0.0260116	0.0191388	0.017094	0.0258303	1	0.00956938	0.0208333	0.0140187	0.0271186	0.0188679	0.0140187
TGCT_M1238	0.025641	0.0263158	0.0214592	0.0263158	0	0.0232558	0.027027	0.0365854	0.024	0.027027	0.0235294	0.0224719	0.0217391	0.025	0.025974	0.0263158	0.0224719	0.025	0	0.0247934	0	0.0263158	0.0266667	0.0215054	0.0222222	1	0.0229885	0.0246914	0.025641	0.0238095	0	0
TGCT_M1246	0.0204082	0.0292683	0.0196078	0.0291262	0.021097	0.0230769	0.0230947	0.025788	0.0194175	0.0184049	0.031746	0.0208333	0.0179641	0.0235294	0.024	0.0186916	0.0229008	0.028169	0	0.021164	0.0337079	0.0314342	0.0236686	0.015625	0.0184615	1	0.0193548	0	0.0220588	0.0221239	0	0.0155039
TGCT_M1269	0.0333333	0.0210526	0.032967	0.0340909	0.0227273	0.0267857	0.0291262	0.0275229	0.0227273	0.030303	0.0305344	0.0342466	0.0325203	0.0315789	0.0208333	0.0310078	0.0299401	0.036036	0.03125	0.0310078	0.0267857	0.0288462	0.0258621	0.0326087	0.0243902	1	0.0333333	0.0366972	0.0224719	0.032	0.0217391	0.024
TGCT_M1275	0.0246914	0.0240964	0.025641	0.025	0	0.0210526	0.0240964	0.0238095	0.0224719	0.0347222	0.0235294	0.0243902	0	0.025	0.0246914	0.0238095	0.0246914	0.0222222	0.0243902	0.0232558	0.0240964	0.0227273	0.0365854	0.0243902	0.0235294	1	0	0	0.0243902	0.0238095	0.0217391	0.0243902
TGCT_M131	0.0291262	0.0264901	0.0253165	0.0217391	0.037594	0.0163265	0.024	0.0217391	0.027027	0.0220588	0.0495868	0.0322581	0.0186916	0.0291971	0.0285714	0.0322581	0.0333333	0.0338983	0.0273973	0.037037	0.0204082	0.027027	0.0215054	0.0217391	0.0353357	1	0.0179641	0.0283019	0.0208333	0.0193237	0.0178571	0.0263158
TGCT_M1373	0	0	0.0344828	0.0322581	0.0333333	0.0344828	0.0166667	0.0322581	0.0294118	0	0	0.0322581	0.03125	0.0322581	0	0.0333333	0.0333333	0.03125	0.0344828	0	0.030303	0	0	0.0333333	0	1	0	0	0	0.0333333	0	0
TGCT_M1375	0.024	0	0.0267857	0	0	0.037037	0.0469484	0.025	0.0307692	0	0.020202	0.0375	0	0	0.025	0.0126582	0.0273973	0.0412371	0.0204082	0	0.0151057	0.0243902	0.0190476	0.025641	0.027933	1	0	0	0	0	0	0.0229885
TGCT_M1458	0.0103093	0.0266667	0.0277778	0.037037	0.0232558	0.0333333	0.0428571	0	0.0375	0.03125	0.0338983	0.0289855	0.0491803	0.0392157	0.029703	0.0347826	0.0285714	0.0338983	0.0444444	0.032967	0.0298507	0.0188679	0.0298507	0.0247934	0.040404	1	0.0294118	0.0378378	0.0408163	0.0327869	0	0.0208333
TGCT_M1474	0.0232558	0.028777	0.0247934	0.0277778	0.030303	0.0232558	0.025974	0.0326087	0.025974	0.0285714	0.0421053	0.0428571	0.0273973	0.0342857	0.0361446	0.030303	0.0298507	0.0165017	0.037037	0.027027	0.0266667	0.0212766	0.0191571	0.0294118	0.0428571	1	0.0326087	0.0309278	0.0273973	0.0263158	0.0357143	0.0294118
TGCT_M1477	0.0416667	0.0322581	0.037037	0.0192308	0.0275229	0.0365854	0.0266667	0.0322581	0.0232558	0.0392157	0	0.0322581	0	0.0338983	0.0273973	0.0392157	0.0338983	0.0298507	0.0327869	0.0330579	0.0238095	0.0425532	0	0.0377358	0.04	1	0.0305344	0.0357143	0.0344828	0.0408163	0.0204082	0.0333333
TGCT_M1487	0.0344828	0.0344828	0.037037	0.0322581	0.0322581	0.0357143	0.0384615	0.030303	0	0	0.037037	0.0357143	0.037037	0.0294118	0.030303	0.037037	0.0384615	0.0384615	0.037037	0.0384615	0.0408163	0.030303	0.037037	0.037037	0.037037	1	0	0.030303	0.037037	0	0	0.037037
TGCT_M15	0.0273438	0.0226244	0.015748	0.0220264	0.0262172	0.0178571	0.0221239	0.0112994	0.028754	0.0199005	0.0144928	0.0275229	0.0257511	0.0262009	0.0237467	0.0184332	0.0291262	0.0172414	0.0201005	0.0193237	0	0.0235988	0.0234742	0.0235849	0.0269058	1	0.0110497	0.0208333	0.027933	0.0159574	0.0183486	0.0197044
TGCT_M1502	0.0222222	0.0310881	0.0212766	0.0309278	0.0222222	0.0254237	0.023753	0.0215827	0.020979	0.0198675	0.0350877	0.0227273	0.0193548	0.0253165	0.0265487	0.0181269	0.0252101	0.0291545	0.0175439	0.0190736	0.0361446	0.0301205	0.0254777	0.0172414	0.0191693	1	0.020979	0	0.0241935	0.0215827	0	0.017094
TGCT_M164	0.0264026	0.0348101	0.037234	0.0211268	0.0204842	0.0263158	0.0243243	0.0220126	0.0302115	0.0268949	0.0264386	0.017301	0.013986	0.0263158	0.0333333	0.0276923	0.020979	0.0398936	0.0273109	0.0335917	0.0157729	0.027439	0.0222222	0.0196629	0.0232558	1	0.0175439	0.0184211	0.0250696	0.0142857	0.0198864	0.017301
TGCT_M167	0.0300926	0.0411255	0.0147874	0.022541	0.0290456	0.0302521	0.0374753	0.0164319	0.036	0.0158371	0.0237718	0.0251046	0.0198582	0.0219922	0.0192678	0.0272109	0.0280236	0.0236559	0.0311958	0.0191489	0.0188034	0.0315375	0.0102041	0.0101266	0.0351852	1	0.0191898	0.0136674	0.0283159	0.0117925	0.0121065	0.0136986
TGCT_M169	0.0245902	0.0269231	0.0259179	0.021097	0.0342612	0.0282486	0.0274314	0.0177305	0.0225989	0.0241935	0.0314465	0.0215517	0.0213675	0.0254777	0.0336134	0.0264423	0.0298507	0.0253165	0.0236794	0.0226481	0.0490798	0.0298507	0.0267176	0.0210843	0.0248227	1	0.0244898	0.040107	0.0224719	0.0176056	0.0194647	0.0140187
TGCT_M172	0.0252427	0.0196507	0.0140515	0.0144928	0.0211946	0.0104712	0.0245098	0.0234043	0.0180995	0.0124069	0.0151515	0.0218409	0.0223325	0.0198675	0.0249671	0.0182556	0.0171149	0.0154525	0.023166	0.0177778	0.0228571	0.0232019	0.0107527	0.016129	0.0184758	1	0.0103627	0.0201613	0.0170316	0.0174672	0.0106667	0.0149626
TGCT_M175	0.0195312	0.0201835	0.0224525	0.00791557	0.0102041	0.024735	0.0161943	0.0237342	0.0209677	0.0243902	0.0149254	0.0163934	0.0271318	0.0125313	0.0277778	0.0274657	0.0188324	0.0281385	0.0261248	0.0258152	0.0273224	0.0227964	0.0172414	0.0155902	0.0202361	1	0.0160321	0.0104167	0.0243243	0.0202703	0.0226481	0.0134409
TGCT_M178	0.0264026	0.0285171	0.0254237	0.0285714	0	0.0188679	0.0318091	0.0235849	0.0208333	0.015	0.0226244	0.0252874	0.0241449	0.023988	0.0212314	0.0216346	0.0184332	0.0303738	0.0175439	0.0221239	0.0274223	0.0308748	0.0305344	0.0215311	0.0226131	1	0.0173913	0.0140187	0.0141509	0.0230769	0	0.0202429
TGCT_M179	0.0253165	0.0330579	0.025	0.0138889	0.0353982	0.0235294	0.025974	0.0263158	0.025974	0.021978	0.0285714	0.0263158	0.0319149	0	0.025641	0.0364964	0.0246914	0.0379747	0.0298507	0.0352941	0.0413793	0.0273973	0.0273973	0.027027	0.0136986	1	0.0319149	0.028169	0.0309278	0.0322581	0.0182648	0.0273973
TGCT_M181	0.036036	0.0325203	0.035503	0.0373832	0.0173913	0.02	0.032967	0.0315789	0.019802	0.0240964	0.0289017	0.0183486	0.0243902	0.0265487	0.0306748	0.0425532	0.0204082	0.0328638	0.027027	0.0313901	0.0196078	0.0357143	0.0196078	0.0231214	0.019802	1	0.0258621	0.0178571	0.025	0.025641	0.0205761	0.0254237
TGCT_M182	0.0261569	0.0282258	0.0282258	0.0140187	0.0197044	0.022508	0.0223881	0.0246914	0.0309735	0.0144231	0.0193133	0.0143541	0.0186047	0.0141509	0.0292683	0.0277778	0.0163934	0.0280374	0.0147059	0.0209205	0	0.0097561	0.017316	0.0187793	0.0331754	1	0.0165289	0.0168067	0.0163934	0.0310078	0.00966184	0.0189573
TGCT_M184	0.0346535	0.0228571	0.0318471	0.0255474	0.0285714	0.0131579	0.0285714	0.0128205	0.0304348	0.0258065	0.0288462	0.0388889	0.0236559	0.0307692	0.0451977	0.0472973	0.035	0.0359281	0.0276498	0.0207254	0.0212121	0.0188679	0.0431655	0.0383275	0.0397351	1	0.0263158	0.0291262	0.0276243	0.0308123	0	0.0346535
TGCT_M185	0.0298507	0.0239521	0.0287356	0.0275229	0.0196078	0.0243902	0.0241935	0.0283401	0.0263158	0.0261438	0.0331126	0.0299401	0.034965	0.0258621	0.025	0.0266667	0.0265957	0.0381679	0.0337838	0.0266667	0.0255319	0.024	0.0258065	0.0291971	0.0229358	1	0.0357143	0.0307692	0.0275229	0.0344828	0.0198675	0.0275862
TGCT_M187	0.0253165	0.0238095	0	0.0243902	0.0136986	0	0.0188679	0	0.0206186	0.0246914	0.025641	0.0253165	0.0131579	0	0.0212766	0.0204082	0.027027	0.0277778	0.0176056	0.0133333	0	0.0266667	0.0232558	0.0246914	0.0229885	1	0	0.0136986	0.0245399	0	0	0
TGCT_M188	0.0234375	0.0220588	0.0227273	0.015625	0.0155039	0.013986	0.0310078	0.0245399	0.020979	0.0260417	0.0225564	0.0195122	0	0.015625	0.0215827	0.040724	0.0232558	0.0230769	0.0220588	0.0196078	0.0236967	0.015748	0.0232558	0.0176471	0.0150376	1	0.0188679	0.015873	0.0331126	0.0273224	0	0.03125
TGCT_M189	0.0298507	0.0275862	0.0325203	0.0215827	0.0162602	0.02	0.0298507	0.0227273	0.0272109	0.0315789	0.0219298	0.0218978	0.0243902	0.0182927	0.0165746	0.0238095	0.016129	0.0367647	0.0243902	0.024	0.031746	0.0333333	0.030303	0.0243902	0.0253165	1	0.0225989	0.0289855	0.0320856	0.0273973	0.0224719	0.0236686
TGCT_M21	0.0175439	0.0170648	0.0117647	0.011976	0.0119048	0.0163043	0.0186567	0.0116959	0.0307018	0.0121212	0.0121212	0.0119048	0.0265957	0.025641	0.0190476	0.0188679	0.0145631	0.0121212	0.0121951	0.0157895	0.0119048	0.0177515	0.016129	0.0178571	0.0174419	1	0.016129	0.0121951	0.0153061	0.0174419	0.0167598	0.0184049
TGCT_M211	0.04	0.0283019	0.038961	0.025	0	0	0.0273224	0.025974	0.0346535	0.025974	0.012987	0.012987	0.025	0.025	0.0291262	0.032967	0.021978	0.025974	0.0253165	0.0267857	0.0232558	0.025641	0.0247934	0.0128205	0.012987	1	0.0190476	0.0254777	0.0340909	0.0263158	0	0.0232558
TGCT_M217	0.0283019	0.0291971	0.0305344	0.027027	0.019802	0.0272109	0.0219298	0.027027	0.0410959	0.0277778	0.0225564	0.0275229	0.0277778	0.0245399	0.0403226	0.0422535	0.0373444	0.0307692	0.0280374	0.0266667	0.0280374	0.0229885	0.0298507	0.0280374	0.026087	1	0.0263158	0.0221402	0.026087	0.0330579	0.037037	0.0252101
TGCT_M222	0.0294118	0.037037	0.038961	0.0322581	0.0294118	0.0322581	0.03125	0.03125	0.03125	0.0189873	0.0322581	0	0.03125	0.0294118	0.0322581	0.0363636	0.0322581	0.031746	0.0322581	0.0444444	0.027027	0.0322581	0.03125	0	0.0444444	1	0.0322581	0.04	0.03125	0.0307692	0.0322581	0.0434783
TGCT_M236	0	0.0277778	0.0280374	0.0277778	0.028169	0.0253165	0.025641	0.021978	0.0373832	0.0133333	0.0212766	0.0215054	0.0277778	0.0212766	0.0266667	0.0273973	0.0138889	0.0285714	0.0285714	0.025641	0.0232558	0.0291262	0.028169	0	0.025974	1	0.028169	0.025	0.0294118	0.0263158	0.0229885	0.027027
TGCT_M245	0.0416667	0.0441176	0.0294118	0.032	0	0.0357143	0.030303	0.025	0.0428571	0.0333333	0.0333333	0.0211268	0.027027	0.0449438	0.04	0.03125	0.0261438	0.0333333	0.031746	0.0375	0.0243902	0.0441176	0.0264901	0.0166667	0.0420168	1	0.03125	0.0289855	0.0322581	0.0212766	0.0277778	0.0309278
TGCT_M278	0.047619	0.0196078	0.0363636	0.047619	0	0.0338983	0.0377358	0.0384615	0.025	0.0357143	0.0344828	0.0408163	0.0298507	0.0333333	0.0235294	0.0410959	0.0196078	0.0338983	0.0192308	0.0333333	0.0174927	0.03125	0.03125	0.0196078	0.0421053	1	0.0266667	0.0365854	0.0298507	0.0285714	0.0333333	0.025641
TGCT_M328	0.0171429	0.0233645	0.0124224	0.0234742	0.0121951	0.0190476	0.0221239	0.0122699	0.0207715	0.0174419	0.015544	0.0243902	0.0273973	0.0209424	0.0246575	0.0186335	0.0173913	0.0171429	0.0216216	0.0207254	0	0.0178571	0.0170213	0.0175439	0.0186335	1	0.011976	0.021645	0.030303	0.0122699	0.0196078	0.019802
TGCT_M34	0.0149254	0.0246914	0.0190476	0.0240964	0.0151515	0.0285714	0.0294118	0.0229008	0.0151515	0.0147059	0.0285714	0.0151515	0	0	0.025	0.0277778	0.0298507	0.0348837	0.0246914	0	0.0285714	0.0307692	0.046875	0.029703	0	1	0.025641	0.0266667	0	0.03	0	0.0285714
TGCT_M40	0.0466667	0.0359281	0.0469799	0.0340136	0.0198675	0.027088	0.0331126	0.0241546	0.0342466	0.0441767	0.0176471	0.027933	0.0457516	0.0366492	0.0358744	0.035503	0.0340136	0.0431373	0.0387097	0.0206897	0.0310078	0.0388889	0.0340909	0.0425532	0.0299145	1	0.0220994	0.017341	0.0378378	0.0433071	0.024024	0.0454545
TGCT_M432	0.0373832	0.04	0.026087	0.0307692	0.0291971	0.0277778	0.0357143	0.0224719	0.030303	0.030303	0.032967	0.0277778	0.025641	0.0322581	0.0481928	0.04	0.0266667	0.0410959	0.030303	0.0289855	0.0285714	0.0326087	0.0266667	0.0352941	0.046875	1	0.015625	0.029703	0.031746	0.0394737	0.030303	0.03125
TGCT_M499	0.0454545	0.0344828	0.0268456	0.0285714	0.0277778	0.0273973	0.0289855	0.0216606	0.0405405	0.0163934	0.0166667	0.0307692	0.025	0.021978	0.0254237	0.0298507	0.0178571	0.0280374	0.0263158	0.0188679	0.0307692	0.0491803	0.0306122	0.029703	0.04	1	0	0.016129	0.0307692	0.025974	0.0192308	0.0294118
TGCT_M50	0.0327869	0.0327869	0.0166667	0.03125	0	0.0294118	0.0166667	0	0.0263158	0.0294118	0.0333333	0.0361446	0.0285714	0.0229885	0.0243902	0.0338983	0.031746	0.0289855	0.0309278	0.039604	0.0277778	0.0307692	0.0333333	0.0166667	0.0166667	1	0.0327869	0.046875	0.0201342	0.031746	0	0.0307692
TGCT_M503	0.0363636	0.027027	0.019802	0.0408163	0.0273973	0.0384615	0.0196078	0.030303	0.0368098	0.0327869	0.0196078	0.037037	0.025	0.0186916	0.0253165	0.0461538	0.0392157	0.0428571	0.0333333	0.02	0.028169	0.0238095	0.0241935	0.037037	0.0263158	1	0.0392157	0.020202	0.030303	0.0344828	0.0227273	0.0344828
TGCT_M514	0.0178571	0.0175439	0.0203046	0.0168776	0.0175439	0.0191388	0.0210526	0.0239044	0.0188285	0.0176991	0.0144928	0.0176211	0.0179372	0.0210843	0.0206186	0.0212766	0.0245098	0.0243902	0.0254777	0.0180995	0.0186916	0.0104712	0.0150754	0.0209424	0.0193237	1	0.014218	0.0201613	0.0206186	0.0178571	0.0180723	0.0221239
TGCT_M522	0.0171429	0	0.031746	0.0163934	0	0.0327869	0.0416667	0.0253165	0.030303	0.025974	0.0172414	0	0.0172414	0.0333333	0.0307692	0.047619	0.0327869	0.046875	0.0222222	0.0169492	0.0163934	0.0172414	0.0344828	0.0333333	0.0307692	1	0	0.04	0.0172414	0.0266667	0.0222222	0.0246914
TGCT_M539	0.026738	0.0314465	0.027027	0.0194805	0.0309278	0.0223464	0.0295203	0.0220994	0.0246914	0.0167598	0.0300429	0.019802	0.0189873	0.0202703	0.0248756	0.0257511	0.03125	0.0324074	0.0188679	0.0194175	0.0210158	0.025641	0.0275862	0.0180723	0.0238095	1	0	0.0136986	0.0196078	0.0265487	0.0253165	0.0213523
TGCT_M618	0.0377358	0.025	0.0338983	0.0181818	0	0.0392157	0.0350877	0.0192308	0.037037	0.0357143	0.0192308	0.0357143	0.0294118	0.0266667	0.0277778	0.037037	0.0185185	0.0357143	0.030303	0.0235294	0.024	0.0350877	0.037037	0.0422535	0.0384615	1	0.0188679	0.0277778	0.027027	0.0363636	0.0188679	0.0447761
TGCT_M625	0.038961	0.025	0.0384615	0.025	0.0255319	0.0247525	0.0318471	0.0213777	0.0363636	0.0191083	0.0267857	0.0247191	0.0216049	0.0318471	0.0306122	0.03125	0.0322581	0.0290698	0.0243902	0.0289256	0.0215827	0.0197368	0.0310559	0.0308642	0.0378378	1	0.0257426	0.0224719	0.0318471	0.0375	0.0276243	0.0235988
TGCT_M632	0.030837	0.0288066	0.0316206	0.0233645	0.0194805	0.0194805	0.0237288	0.0205761	0.0393701	0.03003	0.0282187	0.0235849	0.0180995	0.0294118	0.0401786	0.0209205	0.0251256	0.0397351	0.0325815	0.0327273	0.0208333	0.0358566	0.0310881	0.0250896	0.0257732	1	0.0226415	0.0231023	0.0282686	0.0197044	0.0227273	0.0170213
TGCT_M646	0.0337079	0.0263158	0.0215054	0.0164609	0.021875	0.034965	0.0267686	0.0232558	0.041791	0.0218978	0.0214133	0.022293	0.0244755	0.0213816	0.0227273	0.0262172	0.0171149	0.0199336	0.0152672	0.0231023	0.0161943	0.0196078	0.0212014	0.0188172	0.0290237	1	0.019802	0.0169082	0.0337302	0.015544	0.019305	0.0185185
TGCT_M651	0.027972	0.043956	0.025	0.0373832	0.0224719	0.025	0.025974	0	0.0350877	0.0253165	0.0263158	0.0238095	0.0285714	0.0379747	0.0257732	0.0291262	0.037037	0.0263158	0.0357143	0.025641	0.0377358	0.027027	0.0384615	0.0265487	0.0253165	1	0.0319149	0.0280374	0.0441176	0.025641	0.025974	0.0253165
TGCT_M652	0.0242915	0.0294118	0	0.0263158	0.0243902	0.0294118	0.0247934	0.0288462	0.0208333	0.0275862	0.0211082	0.0217391	0.0232558	0	0.0444444	0.026087	0.0363636	0.0243902	0.028169	0.0240964	0.0304348	0.032	0.0196078	0.0197368	0.0306122	1	0.0272727	0.0252708	0.0185185	0.027933	0	0.0181818
TGCT_M661	0.0174216	0.022508	0.015674	0.0108696	0.00719424	0.0108303	0.0262069	0.0174927	0.0163399	0.0127796	0.0163934	0.0108303	0.0242718	0.0249307	0.0138889	0.0158228	0.0140351	0.0182292	0.0233645	0.0194986	0.0277136	0.0240385	0.0169972	0.0131148	0.0234604	1	0.017341	0.0222222	0.0157895	0.0218579	0.0141343	0.012987
TGCT_M670	0.0188679	0.0190476	0.019084	0.0206897	0	0.0173913	0.0235294	0.027027	0.0194805	0.0223881	0.0175439	0.0227273	0.0181818	0.0183486	0.0191388	0.0190476	0.0169492	0.0218978	0.0181818	0.0205479	0	0.0190476	0.0192308	0.0163934	0.0163934	1	0.026087	0.0181818	0.0246914	0.036036	0.0190476	0.0194175
TGCT_M675	0.0285714	0.0232558	0.0273973	0.0138889	0.0227273	0.0186916	0.0140845	0.0273973	0.020202	0.021978	0.0238095	0.0140845	0.0296296	0.0277778	0.0277778	0	0.0266667	0.0268817	0.0243902	0.0212766	0.0142857	0.025641	0.0142857	0.0384615	0	1	0.0434783	0.0232558	0.0205761	0.0285714	0	0.0142857
TGCT_M676	0.0243902	0.0265487	0.0169492	0.0118343	0	0.0247934	0.0218447	0.0208333	0.0165746	0.0218182	0	0.018018	0.0235294	0.0186916	0.0296736	0.0232945	0.0223124	0.0204918	0.0168539	0.0248963	0.0180723	0.0186916	0.0232558	0.0197628	0.0188679	1	0.0170068	0.0233766	0.0231481	0.0240964	0.0196078	0.0197044
TGCT_M693	0.025974	0	0.0227273	0.0263158	0	0.0322581	0.0229885	0.0163934	0.020202	0	0.0326087	0.0163934	0.0277778	0.0192308	0.0265487	0	0.0298507	0.0322581	0.0202703	0.0163934	0.0454545	0	0.016129	0	0.0319149	1	0	0	0.0272727	0.0177515	0	0.0266667
TGCT_M696	0	0.0384615	0	0.0350877	0.0185185	0	0.02	0.0377358	0.0204082	0.02	0.0204082	0.0377358	0	0.02	0.0273973	0.0229885	0.0289855	0.0337079	0	0.0277778	0.0344828	0.0294118	0.0294118	0.0384615	0.02	1	0.037037	0.0217391	0	0.0266667	0	0.0384615
TGCT_M725	0.025	0.0243902	0.0192308	0.0208333	0.0206186	0.0240964	0.025	0.0232558	0.0248447	0.0224719	0.0235294	0.0210526	0.025974	0	0.0246914	0.0253165	0.0305344	0.0210526	0.0253165	0	0.030303	0.0232558	0.0291262	0.025	0.0217391	1	0.0263158	0.0208333	0.027027	0.025974	0.0174419	0.0232558
TGCT_M727	0.0310881	0.0247525	0.0288462	0.029703	0.0206897	0.026087	0.0258621	0.025	0.0253623	0.0267857	0.034965	0.0314465	0.0294118	0.0277778	0.0267857	0.028169	0.0277778	0.0322581	0.0283688	0.028169	0.024	0.025641	0.0232558	0.0310078	0.0220588	1	0.0378788	0.0327869	0.029703	0.0289855	0.020979	0.0217391
TGCT_M737	0.0178571	0.0182648	0.0238806	0.018018	0.0178571	0.015873	0.0175439	0.0216216	0.0168067	0.0285714	0.0172414	0.0217391	0	0.018018	0.0206897	0.0217391	0.0212766	0.0204082	0.0252101	0.0220588	0.0265487	0.0189573	0.0265487	0.0176991	0.0172414	1	0.0173913	0.0183486	0.0176991	0.0173913	0	0.0176991
TGCT_M739	0.0326087	0.0291262	0.0224719	0.0247934	0.025	0.0240964	0.0243902	0.0224719	0.0280374	0.0337838	0.0246914	0.0178571	0.0222222	0.025	0.0253165	0.0253165	0.0246914	0.025641	0.0375	0.0253165	0.0367647	0.0238095	0.03125	0.0246914	0.0315789	1	0.0238095	0.0205761	0.0363636	0.029703	0.0194175	0.03125
TGCT_M771	0.0377358	0.030303	0.0294118	0.04	0.0272727	0	0.0322581	0.0322581	0.0322581	0.0322581	0.030303	0.031746	0.03125	0.047619	0.0294118	0.0338983	0.030303	0.0487805	0.0298507	0.0465116	0.030303	0.0322581	0.0322581	0.03125	0.03125	1	0.0294118	0.0361446	0.0294118	0.0285714	0.03125	0.0285714
TGCT_M775	0.0454545	0.0333333	0.0392157	0.0434783	0	0.0217391	0.0392157	0.04	0.0421053	0.0392157	0.030303	0.0444444	0.0222222	0.0350877	0.030303	0.0240964	0.0447761	0.0243902	0.0425532	0	0	0.0454545	0.03125	0.025641	0.0327869	1	0.0277778	0.0425532	0.0222222	0.0338983	0.0232558	0.0253165
TGCT_M793	0.0340909	0.0375	0.0306122	0.0253165	0.0375	0.0204082	0.0319149	0.0275862	0.0392157	0.019802	0.0253165	0.03125	0.0222222	0.0408163	0.0454545	0.0357143	0.0430108	0.047619	0.0375	0.0272727	0.0375	0.0379747	0.0291262	0.025	0.038961	1	0.0229885	0	0.0315789	0.0283019	0.0246914	0.039604
TGCT_M808	0.026087	0.036036	0.0380952	0.0232558	0.0246914	0	0.0247525	0.028169	0.0380952	0.0252101	0.0232558	0.0238095	0.0265487	0.0277778	0.0240964	0.0319149	0.0275229	0.032967	0.037037	0.0260417	0.0243902	0.0235294	0.037037	0.0300752	0.0265487	1	0.0272727	0.025	0.0280374	0.0421053	0.030303	0.0322581
TGCT_M838	0	0.0307692	0.0306122	0.031746	0.0322581	0.0285714	0.0289855	0.0151515	0.0408163	0.0151515	0.0235294	0.016129	0.031746	0.0235294	0.030303	0.03125	0.015873	0.0327869	0.0254237	0.0289855	0.0247934	0.0319149	0.0322581	0	0.0294118	1	0.0322581	0.028169	0.0322581	0.0298507	0.025641	0.0307692
TGCT_M865	0.03125	0.031746	0.0285714	0.0151515	0	0.0234375	0.0307692	0.030303	0.0340909	0.0222222	0.0183486	0.025974	0.0263158	0.0263158	0.031746	0.0289855	0.01875	0.0289855	0.031746	0.025	0.032967	0.0307692	0.0190476	0.0253165	0.0298507	1	0.0277778	0.030303	0.0291262	0.03125	0.0232558	0.0425532
TGCT_M896	0.046729	0.0319149	0.029703	0.0341463	0.0259067	0.030303	0.0309278	0.0345912	0.0413223	0.0469799	0.0326797	0.0294118	0.0322581	0.0285714	0.0431034	0.0319149	0.029703	0.0390625	0.028169	0.0277778	0.0396825	0.0326087	0.0340909	0.0236967	0.047619	1	0.0325203	0.0284091	0.0493827	0.03	0.0319149	0.0225564
TGCT_M965	0.0211268	0	0.0232558	0	0	0.032	0.0480349	0.020979	0.0342466	0	0	0.0338983	0	0	0.0206186	0.0188679	0.0245399	0.0442478	0.0201005	0	0.0211268	0.020202	0.0163934	0.0210526	0.0307692	1	0	0.0210526	0.02	0	0	0.0192308
TGCT_M968	0.0238095	0	0.025	0	0.0217391	0.0243902	0.0232558	0.0232558	0.0215054	0	0	0.0408163	0.0227273	0	0	0.025974	0	0.023622	0.0243902	0	0.0227273	0	0.025	0	0.025641	1	0	0.0243902	0.0222222	0	0	0.0243902
TGCT_M973	0.0384615	0	0.0384615	0.0344828	0	0	0	0	0.0357143	0.0294118	0.04	0.0333333	0	0	0.0357143	0.0322581	0.0344828	0.0416667	0.0416667	0	0	0.0416667	0	0.0322581	0.04	1	0	0	0.0416667	0.04	0.04	0.0384615
TGCT_M987	0.0198675	0.0214286	0.0145985	0.026455	0.0142857	0.0215054	0.020979	0.0143885	0.0217391	0.0227273	0.0174419	0.0276243	0.0203046	0.0239521	0.0204082	0.0196078	0.0194175	0.0198675	0.0248447	0.0236686	0	0.0208333	0.0145985	0.0196078	0.0218978	1	0	0.0243902	0.035461	0.0143885	0.0222222	0.0144928
TGCT_M992	0.0434783	0.0416667	0.037037	0.0454545	0	0.0454545	0.0454545	0.0434783	0.0416667	0.0454545	0.03125	0	0.0454545	0.047619	0.0434783	0.0454545	0.047619	0.0454545	0	0.0454545	0.04	0.0454545	0.03125	0.0454545	0.047619	1	0.0344828	0	0.037037	0.0434783	0	0.0416667
THCA_M1006	0.0434783	0	0	0.047619	0	0.0434783	0.047619	0.0322581	0.047619	0	0.0454545	0.0434783	0.0416667	0.0384615	0.0357143	0.0454545	0.0145985	0.0454545	0.04	0.047619	0.0185185	0.047619	0.0454545	0	0.0454545	0.0434783	1	0	0.0344828	0.047619	0.04	0.047619
THCA_M1009	0	0.0217391	0.0416667	0.0454545	0	0.0465116	0.0327869	0.0208333	0.037037	0.0307692	0.0273973	0.0338983	0.0344828	0.0235294	0	0.0227273	0.04	0.0444444	0.0110294	0.0408163	0.0338983	0.0483871	0	0.0222222	0.025	0.037037	1	0.0465116	0.0217391	0.0217391	0	0.0222222
THCA_M1039	0.0306122	0.0188679	0.03125	0.025974	0.0194175	0.0240964	0.0283019	0.0306122	0.0365854	0.0283019	0.0326087	0.0454545	0.0277778	0.030303	0.0288462	0.0365854	0.0285714	0.0294118	0.0377358	0.0285714	0.025974	0.037037	0.0375	0.0217391	0.0289855	0.025641	1	0.0266667	0.034965	0.028169	0.0285714	0.0277778
THCA_M1149	0.038835	0.0264423	0.0254777	0.038961	0	0.0338983	0.037037	0.0306122	0.0338983	0.0253165	0.034188	0.0322581	0.0322581	0.0333333	0.04	0.04	0.0268456	0.0333333	0.0405405	0.030303	0.0288462	0.0289855	0.025	0.0377358	0.0363636	0.0377358	1	0.0414508	0.03125	0.0338983	0.0377358	0.0327869
THCA_M115	0.0241692	0.0194986	0.0295203	0.0313725	0.0153846	0.0195652	0.0193798	0.0190476	0.0226244	0.0309859	0.0333333	0.0353201	0.0195599	0.0222717	0.0408163	0.0297297	0.0216606	0.0239234	0.024055	0.0229008	0.0215517	0.0200669	0.0217391	0.0207254	0.025	0.0208333	1	0.0301508	0.0288809	0.0144231	0.0153846	0.0373444
THCA_M116	0.023622	0.027027	0.0234375	0.0212766	0.0210526	0.0227273	0.0210526	0.0210526	0.0229885	0.0285714	0.0225564	0.0216216	0.0190476	0.0245098	0.0322581	0.0222222	0.0215054	0.0275229	0.0227273	0.0252101	0.0208333	0.0351759	0.0272727	0.0212766	0.0212766	0	1	0.0204082	0.0235294	0.0208333	0	0
THCA_M1169	0.0289855	0.0361446	0.0319149	0.0240964	0	0.0294118	0.0245399	0.0235294	0.038961	0.0322581	0.0238095	0.0267857	0.0253807	0.0319149	0.0365854	0.032967	0.0246914	0.0326087	0.047619	0.0344828	0.025641	0.0291262	0.0246914	0.025641	0.0217391	0.0326087	1	0.0230769	0.0310078	0.0230769	0.0186916	0.027933
THCA_M123	0.0221607	0.0323625	0.0196078	0.0194175	0.0207254	0.022567	0.0206186	0.0232558	0.0201835	0.0206897	0.0345423	0.0246212	0.0212314	0.021692	0.019656	0.016835	0.0248227	0.0191083	0.0202703	0.0261628	0.0277296	0.0202312	0.0176471	0.0194647	0.0188679	0.0141844	1	0.0223285	0.0234542	0.0145985	0.0227273	0.0201511
THCA_M1242	0.0344828	0.021978	0.04	0.0327869	0.0289855	0.0307692	0.0377358	0.0392157	0.0384615	0.0307692	0.0405405	0.0384615	0.0322581	0.0266667	0.0277778	0.03125	0.0384615	0.0384615	0.0337079	0.0192308	0.0277778	0.03125	0.0357143	0	0.0357143	0.0333333	1	0.0350877	0.0229885	0.0377358	0.0363636	0.0333333
THCA_M125	0.0232558	0.0273973	0.025	0.027933	0.0258065	0.0222222	0.0261438	0.0241935	0.0242424	0.0252101	0.0454545	0.0330882	0.0176991	0.025974	0.0265957	0.025974	0.0342857	0.0210526	0.0208333	0.0155039	0	0.0263158	0.0213904	0.0197368	0.0245399	0.0253165	1	0	0.0267857	0.0218978	0.0276498	0.0175439
THCA_M126	0.034965	0.0328638	0.0229008	0.023622	0	0.0285714	0.0290698	0.0306748	0.0310559	0.0188679	0.0238095	0.0212766	0.0310881	0.0231481	0.024	0.0229358	0.0380952	0.0183486	0.0261438	0.0324675	0.0229008	0.0231214	0.037037	0.0174419	0.0252525	0.0176991	1	0.0247934	0.0257732	0.0173913	0.0175439	0.0176991
THCA_M127	0.0217391	0.0245399	0.0169492	0.0217391	0.0185185	0.0243902	0.0149254	0.0242424	0	0.023622	0.0215827	0.0283688	0.02	0.0300752	0.020979	0.0280374	0.0204082	0.0337079	0	0.024	0	0.018018	0.0287356	0.027027	0.0173913	0	1	0.0448718	0.0283019	0.0199005	0.0350877	0
THCA_M129	0.0283688	0.0215054	0.0235294	0	0.02	0.0227273	0.0232558	0.0361446	0.0280374	0.0243902	0.0235294	0	0.0224719	0.0212766	0.0235294	0.0210526	0.0229885	0.0238095	0.019802	0.0185185	0	0.0172414	0.0365854	0	0	0.0224719	1	0	0.0227273	0.0206186	0	0.0275229
THCA_M13	0.0290179	0.0200573	0.0243902	0.016129	0.0209581	0.00958466	0.0255864	0.0161725	0.0180412	0.0262794	0.0212766	0.0327022	0.0180879	0.0276498	0.0230352	0.017192	0.0163488	0.0210526	0.0348584	0.0125	0.0270833	0.0186667	0.021978	0.0314637	0.0248756	0.0243408	1	0.0164384	0.0366972	0.012012	0.0296296	0.0329412
THCA_M130	0.0291262	0.0245902	0.0322581	0.0264901	0.0287356	0	0.0223464	0.028169	0.0227273	0.0223881	0.0326087	0.0192308	0	0.0267857	0.0330579	0.020202	0.0243902	0.0253165	0.0278884	0.0210526	0.021645	0.0238095	0.0210526	0.025974	0.0265487	0.0251572	1	0.0217391	0.038835	0.0208333	0.0215054	0.0241935
THCA_M137	0.0223881	0.0295858	0.0266667	0.025	0.0149254	0.025641	0.0204778	0.0223881	0.0229885	0.0218978	0.0301508	0.0245399	0.0189873	0.027907	0.031746	0.0229008	0.0192308	0.0248756	0.0305677	0.0220588	0.0276243	0.0238095	0.0180995	0.0214286	0.0267857	0.0147059	1	0.0327869	0.0384615	0.0204082	0.021097	0.0176471
THCA_M138	0.0218978	0.017341	0.0207254	0.0260417	0.025641	0.0204082	0.0235294	0.0150376	0.0204082	0.0234375	0.0288462	0.0322581	0.0191388	0.0372093	0.0266667	0.0212766	0.0212766	0.0150376	0.0272109	0.0228571	0.017341	0.0225989	0.0206897	0.028169	0.0217391	0.0178571	1	0.0147059	0.0289855	0.0197628	0.0245902	0.0216216
THCA_M139	0.0285714	0.0263158	0	0.0309278	0	0	0.0277778	0.027027	0.0434783	0.0277778	0.0307692	0.0405405	0.0246914	0.0337079	0.025	0.0294118	0.025641	0.0294118	0.0224719	0.025641	0.030303	0.0298507	0.0273973	0.0266667	0.0277778	0.021978	1	0.0266667	0.0289855	0.027027	0.0235294	0.0333333
THCA_M141	0.0203252	0.0261438	0.0299401	0.0192308	0	0.0214286	0.0272109	0.0305344	0.0299401	0.0198675	0.03125	0.0282258	0.0414201	0.025	0.025	0.0300752	0.025641	0.0230769	0.026087	0.0344828	0.032	0.0234375	0.0208333	0.0227848	0.0189873	0.0222222	1	0.0261438	0.0231481	0.030303	0.024	0.0230769
THCA_M202	0.026087	0.0212766	0.0234375	0.0326087	0.024	0.0290698	0.03	0.0275862	0.0266667	0.0430108	0.03125	0.0280374	0.0294118	0.0448718	0.027027	0.0252101	0.0315789	0.0223881	0.0238095	0.0235294	0.032967	0.0294118	0.021978	0.0322581	0.0225564	0.0254237	1	0	0.025641	0.0361446	0.0289855	0.0241546
THCA_M209	0.0182927	0.0238095	0.0220588	0.0212766	0.0234375	0	0.0333333	0.027027	0.0294118	0.0185185	0.0305344	0.0241935	0.0232558	0.0258398	0.0295567	0.025641	0.0291971	0.0310559	0.0299824	0.0272727	0.0268456	0.018018	0.0290698	0.025	0.0172414	0.0193548	1	0.0222222	0.0232558	0.0181818	0.0246305	0.0212766
THCA_M218	0.0277778	0.038961	0.0344828	0.0196078	0	0.0344828	0.0157895	0.0185185	0.03	0.0363636	0.0298507	0.0384615	0.0357143	0.0217391	0.0240964	0.0273973	0.0338983	0.0384615	0.0363636	0.0185185	0.0309278	0	0.0277778	0.0246914	0.0178571	0.025	1	0.0363636	0.0238095	0.0196078	0.0315789	0.0365854
THCA_M240	0.0273973	0.023622	0.0253165	0.029703	0.0206186	0	0.03125	0.0224719	0.0366972	0.03125	0.041958	0.031746	0.0289855	0.0204778	0.0298507	0.0316456	0.0253165	0.0197368	0.0348837	0.030303	0.0298507	0.0217391	0.0357143	0.030303	0.0185185	0.0298507	1	0.031746	0.031746	0.0375	0.0142857	0.015625
THCA_M245	0.0259067	0.0413625	0.0232558	0.0193237	0.0200803	0.0194805	0.0227273	0.021164	0.0212121	0.023569	0.0210526	0.0232558	0.0255864	0.0215517	0.025	0.0225989	0.0227273	0.0253165	0.0283401	0.0265957	0.0236686	0.0184049	0.0217391	0.0215054	0.0212766	0.0148515	1	0.0189573	0.027907	0.0248756	0.0219436	0.0233918
THCA_M262	0.0260417	0.0196078	0.03125	0	0	0.0224719	0.0229008	0.0245902	0.0319149	0.0224719	0.0254237	0.0192308	0.0283019	0.019685	0.0309278	0.0222222	0.0224719	0.0280374	0.029703	0.0210526	0.0215054	0.032967	0.0224719	0.0217391	0.0217391	0.0322581	1	0.0222222	0.0288462	0.0222222	0.0273224	0.0224719
THCA_M274	0.0236686	0.0208696	0.0149254	0.0120968	0.0116732	0.021322	0.0228571	0.0172414	0.0329457	0.0255102	0.0170648	0.031185	0.0231729	0.0266106	0.0145985	0.0247148	0.0183246	0.02079	0.0337838	0.0277778	0.0152672	0	0.0150943	0.0205479	0.0264026	0.0258065	1	0.0147493	0.0220588	0.0144928	0.0159363	0
THCA_M281	0.0227273	0.0319149	0.0246914	0.0238095	0.0217391	0.0131579	0.0365854	0	0.0170455	0	0.0306122	0.0365854	0.0246914	0	0.0280374	0.030303	0	0.0235294	0	0.0275229	0.0232558	0.020202	0.0266667	0	0.025974	0.0204082	1	0	0.0314961	0.0291262	0	0.025
THCA_M30	0.0345269	0.0413972	0.026643	0.0165441	0.0223214	0.0253165	0.0288945	0.0393519	0.0329381	0.0251656	0.0326481	0.0272	0.0348706	0.030137	0.0311419	0.0336474	0.0264201	0.0319889	0.041411	0.0210084	0.0365854	0.0281294	0.0335277	0.0279955	0.0345781	0.0233074	1	0.0216049	0.0318021	0.0220713	0.0258359	0.0163265
THCA_M310	0.0285714	0.024	0.0217391	0.0205479	0.0223881	0.0218978	0.0244898	0.037037	0.0245098	0.0162602	0.0264901	0.0258065	0.0225989	0.0232558	0.0268817	0.0300752	0.0266667	0.0259067	0.0273973	0.0243902	0.0327869	0.0176471	0.0300752	0.0289855	0.0165289	0.0225564	1	0.0193548	0.0482759	0.021978	0.0163934	0.0178571
THCA_M35	0.0342466	0.0238095	0.0247934	0.017094	0	0.0241935	0.0229008	0.0246914	0.0301205	0.0175439	0.020979	0.0172414	0.0243902	0.015625	0.0245902	0.0211268	0.0252101	0.0227273	0.0280374	0.0227273	0.021978	0.0258621	0.0233918	0.0176991	0.017094	0.0254237	1	0.0173913	0.034965	0.0223881	0.0241935	0.0248447
THCA_M38	0	0.0212766	0.0272727	0.0215054	0.0194175	0.0183486	0.0220588	0.0333333	0.0194175	0.0265487	0.0326087	0.0241935	0.0306122	0.020202	0.024	0.0229008	0.0185185	0.0204082	0.0208333	0	0.0306122	0.0272727	0.0234375	0.0213675	0.0190476	0.0192308	1	0.0184049	0.0265152	0	0.0275229	0.0188679
THCA_M40	0.0254777	0.0233645	0.0257732	0.0208877	0.0247934	0.0207254	0.0183486	0.0484581	0.0216216	0.0311419	0.0348837	0.027933	0.0267176	0.0223464	0.0309278	0.0195122	0.0271493	0.0273224	0.0266667	0.0390625	0.0401606	0.034642	0.0219436	0.0255319	0.0251572	0.0163043	1	0.0220994	0.0213904	0.0199005	0.0167598	0.0261438
THCA_M414	0.025	0.0217391	0	0.025974	0	0.0133333	0.0235294	0.0263158	0.0240964	0	0.0379747	0.0493827	0.0232558	0.025	0.0384615	0.0227273	0.0266667	0.0421053	0.0265487	0.0263158	0.029703	0.021978	0.0285714	0.0243902	0.0238095	0	1	0.0129032	0.0229885	0.0348837	0.0425532	0.0253165
THCA_M42	0.02	0.0318182	0.021164	0.0192308	0.0143885	0.0191083	0.0141844	0.0337553	0.0217391	0.0204082	0.0263158	0.023622	0.028169	0.0285714	0.0208333	0.0191083	0.0328947	0.0337079	0.030837	0.028777	0.0227273	0.02	0.0258065	0.0227273	0.0218579	0.0138889	1	0.0204082	0.0327869	0.0206186	0.0205479	0.0380435
THCA_M424	0.0298507	0.028169	0.0289855	0.0294118	0.03125	0	0.0285714	0.0273973	0.03125	0.0210526	0.027027	0.0246914	0	0.027027	0.025641	0.030303	0.0227273	0.030303	0.0289855	0.0322581	0.0294118	0.038961	0.025641	0.030303	0.0273973	0.030303	1	0.0235294	0.0314961	0.0298507	0	0.0461538
THCA_M429	0	0.0338983	0.0384615	0.0192308	0.0196078	0	0	0	0.0357143	0.0394737	0.0344828	0.0447761	0.0384615	0.0192308	0	0	0.025641	0.0344828	0	0	0.028169	0.0333333	0.0298507	0.028169	0.0350877	0.0181818	1	0.0136986	0.0377358	0.0192308	0.0357143	0.04
THCA_M43	0.0305344	0.0223881	0.0204778	0.0193548	0.020979	0.0205479	0.023622	0.0358423	0.0257235	0.0151515	0.025	0.0250784	0.0215054	0.0240964	0.025641	0.0333333	0.0251572	0.0253165	0.0258065	0.0227273	0.0305344	0.017341	0.0289017	0.0272109	0.0153846	0.0283688	1	0.0188088	0.0454545	0.0427807	0.0316456	0.017301
THCA_M45	0.0380952	0.0308642	0.0261194	0.0204082	0.03125	0.0322581	0.0318471	0.0309278	0.0267857	0.0273038	0.0373134	0.0215054	0.0230769	0.0272109	0.0326797	0.026455	0.029703	0.0263158	0.0341463	0.0166667	0.0239044	0.0298507	0.027027	0.0294118	0.0272109	0.0210526	1	0.0275862	0.0285714	0.03	0.0201342	0.0217391
THCA_M484	0.0275229	0.029484	0.0257353	0.0241546	0.0117647	0	0.0252101	0.0404624	0.0301724	0.021097	0.0373134	0.0255682	0.022293	0.0320856	0.0299625	0.0288462	0.0337662	0.0260586	0.0218579	0.0195312	0.0307263	0.0187793	0.0345821	0.0333333	0.0220994	0.0170455	1	0.0285714	0.0267857	0.0230769	0.0243902	0.0265957
THCA_M520	0.0340909	0.0266667	0.0217391	0.0416667	0.0208333	0.0288462	0.0357143	0.025	0.0307692	0.037037	0.0357143	0.0410959	0.0350877	0.0181818	0.0327869	0.020202	0.0254777	0.0357143	0.0289855	0.0363636	0.031746	0.0307692	0.0350877	0.0350877	0.0410959	0	1	0.0253165	0	0.0298507	0.0344828	0.0344828
THCA_M524	0.0298507	0.0266667	0.0273973	0.0243902	0.0285714	0.0188679	0.027027	0.0416667	0.030303	0.0308642	0.0428571	0.0425532	0.0240964	0.0277778	0.0285714	0.0294118	0.0298507	0.0294118	0.0344828	0.0285714	0.0309278	0.0322581	0.0326087	0	0.0224719	0.0285714	1	0.025974	0.037037	0.0246914	0	0.0238095
THCA_M541	0.0236686	0.0310881	0.0224215	0.019802	0.0215054	0.0250784	0.0253165	0.0289256	0.026178	0.0214286	0.0284974	0.0264317	0.0209424	0.020649	0.0251572	0.0254777	0.0248756	0.0242424	0.0274725	0.0300429	0.0210084	0.030303	0.0215517	0.0234375	0.0251572	0.0195122	1	0.0244648	0.0277008	0.0193237	0.03	0.0210526
THCA_M547	0.04	0	0.0454545	0.037037	0.0454545	0.04	0	0.0454545	0	0.047619	0.0434783	0.047619	0.0434783	0.0454545	0.0454545	0.0454545	0.04	0.047619	0.0333333	0	0.047619	0	0.047619	0.0416667	0.0454545	0.0384615	1	0	0.0434783	0.0454545	0.0175439	0.0454545
THCA_M560	0.0263158	0	0.0235294	0	0	0.0333333	0.019802	0.0211268	0.0168539	0.0319149	0.025641	0.0275229	0.025641	0.029703	0.0272727	0	0.0266667	0.0272109	0	0	0.0204082	0.025641	0.020979	0.0288462	0.0243902	0	1	0.0483871	0.024	0.025974	0.0240964	0
THCA_M571	0.025974	0.0315789	0.0153374	0	0.0347826	0	0.015873	0	0.0273973	0.0298507	0.0240964	0.021978	0	0.0352941	0.0425532	0.0253165	0.03	0.0263158	0.030303	0.0222222	0.0153846	0.0243902	0.0294118	0.0314961	0.0294118	0.0203046	1	0.0243902	0	0.0289855	0.0263158	0.030303
THCA_M575	0.0263158	0.0254237	0.0326087	0.0213904	0.0172414	0.0257511	0.0204082	0.0322581	0.0260586	0.0217391	0.0263158	0.0327869	0.0245902	0.0306122	0.0208333	0.0263158	0.0208333	0.0248447	0.031746	0.0217391	0.0300752	0.0234375	0.0222222	0.026087	0	0.0210526	1	0.0422535	0.0466321	0.0252101	0.021021	0.0232558
THCA_M578	0.025974	0.0230769	0.0266667	0.020202	0.0173913	0	0.0314961	0.025	0.0288462	0.025	0.0363636	0.0363636	0.0240964	0.0306748	0.0238095	0.0306122	0.0217391	0.0222222	0.03125	0.0309278	0.020202	0.0291262	0.0294118	0.0153257	0.0315789	0.02	1	0.0206186	0.030303	0.0238095	0.0242915	0.028169
THCA_M64	0.0353535	0.027451	0.029484	0.0238095	0	0.0245098	0.0243902	0.0301075	0.037037	0.0223642	0.0289256	0.0353982	0.0381471	0.0430622	0.0239316	0.021164	0.0439024	0.0232558	0.0323887	0.0409091	0.0330882	0.0236486	0.0323625	0.0304569	0.0245098	0.0326531	1	0.0456621	0.028169	0.038961	0.0239362	0.0263158
THCA_M65	0.0252874	0.0281124	0.0206897	0.025	0.0213675	0.0182927	0.0269058	0.0210526	0.0273038	0.0230415	0.0386266	0.0227273	0.0352941	0.0245399	0.0304878	0.020979	0.0238095	0.0194805	0.0273973	0.037037	0.0282486	0.0215054	0.0220386	0.02	0.0185185	0.0222222	1	0.024735	0.0263158	0.0209424	0.0197368	0.0223464
THCA_M696	0.0289855	0.0441176	0.0408163	0.0238095	0	0.0243902	0.0165746	0.0222222	0.032967	0.03125	0.0238095	0.0465116	0.0425532	0.0240964	0.027027	0.03125	0.0232558	0.0357143	0.0434783	0.0222222	0.0340909	0	0.031746	0.0277778	0.0212766	0	1	0.0350877	0.0227273	0.0238095	0.0229885	0.0410959
THCA_M712	0.0307692	0.0208333	0.028169	0.0322581	0.025	0	0.0357143	0.0246914	0.04	0.0357143	0.0367647	0.0363636	0.0327869	0.0174825	0.0338983	0.0246914	0.028169	0.0208333	0.0384615	0.0246914	0.0338983	0.0238095	0.025974	0.0188679	0.0172414	0.025	1	0.0363636	0.0363636	0.0273973	0.0147059	0
THCA_M718	0.0289017	0.0381679	0.0206612	0.0213904	0.0193548	0.0215054	0.0194986	0.0236686	0.0225806	0.0224215	0.0217391	0.0212766	0.0239521	0.0131579	0.0202703	0.0254777	0.0211268	0.0289855	0.030837	0.0179372	0.0234604	0.020979	0.0181818	0.0240964	0.0190114	0.0164835	1	0.0209424	0.0307692	0.0276243	0.02	0.0197368
THCA_M727	0.0277778	0	0.037037	0	0	0	0.0258621	0.0280374	0.0379747	0.0240964	0.0291262	0.0224719	0.032967	0	0.0365854	0.0266667	0.027027	0.0326087	0.0243902	0	0.025641	0.0394737	0.0253165	0.025974	0.025974	0.0384615	1	0	0.0288462	0.0266667	0.0297619	0.027027
THCA_M73	0.0188679	0.019802	0.0263158	0.0194175	0	0	0.0248756	0.0196078	0.0194175	0.0294118	0.0485437	0.0373832	0.0239234	0.0243902	0.0288462	0.0175439	0.02	0.0330579	0.0218978	0.0196078	0.04	0.0196078	0.0229008	0.0257732	0.0181818	0.0192308	1	0.0222222	0.0320856	0.0267857	0.0333333	0.0306748
THCA_M734	0.0285714	0.0174825	0.0157068	0.0153061	0.0103093	0	0.0199601	0.0186047	0.0303688	0.0252809	0.0204778	0.0252525	0.0238095	0.0242792	0.0185185	0.0204082	0.0184615	0.0184615	0.0282051	0.0251346	0.0216216	0	0.0175439	0.0236842	0.0230769	0.027668	1	0.0185874	0.0261194	0.0183486	0.0207254	0.0157895
THCA_M74	0.0314465	0.0327869	0.0298507	0.0251572	0.0204082	0.0272109	0.0235294	0.029661	0.028436	0.0228571	0.0261194	0.0266667	0.0234375	0.0210084	0.0285714	0.0362694	0.0285714	0.0320513	0.029703	0.0292398	0.027451	0.0188679	0.0197368	0.0232558	0.0264026	0.0271318	1	0.027027	0.0198413	0.0206186	0.0212314	0.037037
THCA_M76	0.026087	0.047619	0.0288462	0.025	0	0.0344828	0.0348837	0.031746	0.025	0.0272109	0.0485437	0.04	0.0325203	0.0465116	0.0430108	0.037037	0.025	0.032967	0.030303	0.0487805	0.032967	0.0414201	0.0243902	0.0272727	0.0365854	0.0265487	1	0.025	0.0307692	0.045977	0.025	0.0365854
THCA_M77	0.025	0.0238095	0.0243902	0.0283688	0.025974	0	0.0275229	0.0232558	0.025974	0.037037	0.0229885	0.0234375	0	0.0229885	0.03125	0.0253165	0.0384615	0.0253165	0.025	0.0283019	0.029703	0.0333333	0.025	0.0253165	0.0294118	0.0253165	1	0.0215054	0.0285714	0.0352941	0.0126582	0.0384615
THCA_M79	0.0267857	0.0280374	0.03	0.0208333	0	0	0.0153551	0.0169492	0.02	0.0295858	0.028777	0.0322581	0.0208333	0.024	0.0212766	0.0277778	0	0.0268456	0.0267857	0.0309278	0.027027	0.0298507	0.018018	0.0263158	0.03	0.0243902	1	0.0148883	0.0333333	0	0.0225564	0.0206186
THCA_M83	0.0363636	0.0196078	0.031746	0.0408163	0	0.0204082	0.0322581	0.0289855	0	0.02	0.0416667	0.02	0	0.0392157	0	0	0.047619	0.0187793	0.0217391	0.0377358	0.0327869	0.0273973	0	0.0377358	0.037037	0.0294118	1	0	0.0357143	0	0.027027	0.0185185
THCA_M853	0.0299401	0.0340909	0.030303	0.0227273	0.0224719	0.0280374	0.0238095	0.0223881	0.0365854	0.03125	0.0224719	0.025641	0.0247525	0.030303	0.0344828	0.03125	0.0267857	0.0309278	0.0449438	0.0330579	0.0245902	0.0277778	0.0352941	0.0240964	0.0206186	0.03125	1	0.0240964	0.0298507	0.0222222	0.0178571	0.0271739
THCA_M880	0.03125	0	0	0.0327869	0	0.0169492	0.0289855	0.0333333	0.0298507	0.028169	0.0352941	0.0298507	0.0285714	0.011236	0.031746	0.0277778	0.0338983	0.0375	0.0322581	0.028169	0.0238095	0.0266667	0	0.030303	0.0294118	0.0220994	1	0	0.028169	0.0428571	0.0379747	0.0285714
THCA_M889	0	0.037037	0.0384615	0	0	0.0434783	0.00662252	0.037037	0.0434783	0.037037	0.0454545	0.0434783	0.0454545	0.0434783	0.04	0.0454545	0.0454545	0.04	0.0434783	0.0196078	0.0384615	0.0454545	0.0434783	0.0416667	0.0434783	0.0454545	1	0.0434783	0	0.0434783	0.0322581	0.0454545
THYM_M100	0.0408163	0.0204082	0.0350877	0.0196078	0	0.0392157	0.04	0.0377358	0.0350877	0.0277778	0	0.0196078	0.02	0.0377358	0.0408163	0.0363636	0.0277778	0.0204082	0	0.0344828	0.0357143	0.0384615	0.0181159	0.0169492	0.0333333	0.0204082	0.02	1	0.04	0.0408163	0	0.04
THYM_M101	0.0230769	0.0258621	0.0347826	0.0238095	0	0.028436	0.0215827	0.018018	0.0248447	0.0390625	0.0223881	0.032	0.0362319	0.0387597	0.0239044	0.0252101	0.0282486	0.0292398	0.03	0	0.027027	0.0200803	0.0238095	0.0168067	0.027027	0.0181818	0.0263158	1	0.0245902	0.0275229	0.0169492	0.0176991
THYM_M1021	0.028169	0.0285714	0.030303	0.0253165	0	0.03125	0.030303	0	0.0273973	0	0.0384615	0.0222222	0	0.0222222	0.0294118	0.031746	0.03125	0.0298507	0.0266667	0.0307692	0.0294118	0.030303	0.0307692	0.0149254	0.038961	0.0227273	0.0266667	1	0.0275229	0.0246914	0.0285714	0.0289855
THYM_M103	0.0266667	0.028169	0.039604	0.0289855	0	0.0238095	0.0190476	0.025	0.0322581	0.0136986	0.0263158	0.0277778	0.045045	0.0285714	0.0319149	0.0408163	0	0.0380952	0.0416667	0.0277778	0.0273973	0.0277778	0.045977	0.046729	0	0.0263158	0.0232558	1	0.038961	0.0348837	0.027027	0
THYM_M1046	0.03125	0.0374332	0.0314136	0.0238908	0.020202	0.0364964	0.0283688	0.0199336	0.026455	0.0253968	0.0358744	0.0343137	0.0309278	0.025	0.0289017	0.0297619	0.0325	0.0221239	0.0215054	0.0342857	0.03663	0.035503	0.0296296	0.0391304	0.0282258	0.0324675	0.040293	1	0.034188	0.0222222	0.0247525	0.0291667
THYM_M1057	0.0238095	0.0394737	0.0365854	0.021978	0	0.0266667	0.032967	0.032967	0.0315789	0.0306122	0.020979	0.026087	0.0288462	0.0291262	0.0375	0.025974	0.0263158	0.0243902	0.0272727	0.0402685	0.0298507	0.0326087	0.0155039	0.0275229	0.0292398	0.0253165	0.045977	1	0.0272727	0.027027	0.0235294	0.0267857
THYM_M1082	0.0277778	0.0288462	0.0272727	0.0384615	0.0235294	0.0232558	0.0267857	0.0229885	0.0265487	0.0252101	0.0291262	0.0235294	0.0238095	0.0402685	0.034188	0.0238095	0.0245902	0.0267857	0.0350877	0.0306122	0.0254237	0.0243902	0.0243902	0.0277778	0.0336134	0.0314961	0.0245098	1	0.0277778	0.0319149	0.029703	0.0285714
THYM_M1091	0.028169	0.030303	0.030303	0.0298507	0.0365854	0.0258621	0.030303	0.0285714	0.0277778	0.0307692	0.0316456	0.04	0.0298507	0.0285714	0.0285714	0.0277778	0.0306122	0.0277778	0	0.027027	0.0422535	0.03125	0.0294118	0.0309278	0.0289855	0.0227273	0.0273973	1	0.025	0.0235294	0.0265487	0.025974
THYM_M110	0.0444444	0.0454545	0.0289855	0	0.0266667	0.0235294	0.0232558	0.0266667	0.0246914	0.0379747	0.0319149	0.0273973	0	0.029703	0.0379747	0.0405405	0.0285714	0.0357143	0.0246914	0.027027	0.027027	0.037037	0.0238095	0.0289855	0.0227273	0.025	0.025	1	0.025	0.0266667	0	0.0277778
THYM_M1103	0.027027	0.0357143	0.0277778	0.0377358	0	0.0169492	0.0188679	0.0344828	0.031746	0.0344828	0.0384615	0.0384615	0.0377358	0.0243902	0	0.020202	0.0246914	0.0266667	0.0185185	0.0483871	0	0.0185185	0.020202	0.0238095	0	0.0298507	0.030303	1	0.0277778	0.0357143	0.0240964	0
THYM_M1105	0.0493827	0.0377358	0.0204082	0.0408163	0.0363636	0.0434783	0.0434783	0	0.0416667	0.0392157	0.0350877	0.0204082	0	0.0236967	0.0392157	0.030303	0.025	0.0344828	0.0217391	0.0222222	0.0491803	0.0246914	0	0	0.025641	0.04	0	1	0.0322581	0.0155039	0.0434783	0.0377358
THYM_M112	0.0333333	0.03125	0	0.0322581	0.0294118	0.0263158	0	0.0357143	0.0285714	0	0.0322581	0	0.030303	0.0210526	0.0333333	0.0285714	0.03125	0.0333333	0.0280374	0.0322581	0.030303	0	0.0408163	0.0357143	0.0133333	0	0.04	1	0	0.0322581	0	0.0322581
THYM_M1138	0.0192308	0.0198675	0.0208333	0.02	0.0203046	0.0186916	0.0206186	0.0267857	0.0190476	0.0206897	0.0258065	0.0204082	0.0220588	0.0153846	0.0241935	0.0196078	0.0222222	0.0190476	0.0201005	0.0238095	0.0194175	0	0.03	0.021978	0	0.0239521	0.0333333	1	0.0208333	0.0185185	0.020202	0.0243902
THYM_M1144	0.0265487	0.0290323	0.0283019	0.0185185	0.0252101	0	0.0253807	0.0240964	0.0254237	0.0233918	0.0255102	0.0181818	0.028169	0.045045	0.0364964	0.0276498	0.0396825	0.04	0.0283688	0.025974	0.030303	0.0181818	0.0285714	0.025	0	0.0195531	0.024	1	0.0299625	0.028777	0.0246914	0.0181818
THYM_M1165	0.0266667	0.0379747	0.0344828	0.0278884	0.0263158	0.0280374	0.0251572	0.024	0.0324675	0.0246914	0.0235294	0.0272727	0.0242718	0.0378378	0.03125	0.020979	0.0266667	0.0273973	0.0225564	0.0416667	0.025974	0.026087	0.0215054	0.0243902	0.037594	0.025974	0.0265487	1	0.0322581	0.0247934	0.0380952	0.025
THYM_M118	0.0300429	0.0340314	0.0298165	0.0342466	0.0110375	0.0357143	0.0265487	0.0280112	0.0310734	0.0330789	0.0286885	0.0349515	0.0307942	0.0315315	0.0392799	0.0215517	0.040678	0.0189753	0.0226365	0.0343284	0.0468966	0.0297806	0.024619	0.0321489	0.0261044	0.0167364	0.0378378	1	0.0385906	0.0271003	0.0307692	0.0315985
THYM_M12	0.0208333	0.0208333	0.0164835	0.019337	0.0204842	0.021645	0.0170455	0.025	0.021164	0.0184502	0.0208333	0.0242915	0.0278552	0.0199005	0.0241935	0.0185874	0.0193237	0.0147783	0.0223881	0.018018	0.0219298	0.0197044	0.0193237	0.0150754	0.0218069	0.0222222	0.0228758	1	0.0208333	0.0114286	0.0171429	0.0204918
THYM_M120	0.0321101	0.0338346	0.0354839	0.0234742	0.0202899	0.0231023	0.0319149	0.039801	0.03125	0.0254545	0.0231481	0.0362903	0.0247934	0.0358744	0.0371901	0.0338164	0.037037	0.0348259	0.0257511	0.0333333	0.0313589	0.0269058	0.0325203	0.0354331	0.0289855	0.0199005	0.0298507	1	0.0448276	0.0292887	0.0253623	0.0299145
THYM_M1204	0.0285714	0.0350877	0.0181818	0.0350877	0	0.0357143	0.0333333	0.0175439	0.0410959	0.0338983	0.0493827	0.03	0	0.0333333	0.0319149	0.025974	0.032967	0.0289017	0.032967	0.0357143	0.025641	0.0344828	0.0298507	0.0326087	0.0384615	0	0.0190476	1	0.03125	0.0238095	0.0172414	0.025974
THYM_M1213	0.0288462	0.0377358	0.030303	0.0298507	0.025974	0.0298507	0.025	0	0.0292683	0	0.029703	0.0410959	0.0224719	0.0285714	0.0283019	0.0243902	0.0422535	0.0238095	0.0315789	0.0204082	0.0240964	0.0315789	0.0357143	0.03	0	0.0218978	0.0423729	1	0.020202	0.03125	0.0298507	0
THYM_M1216	0.030303	0.0273973	0.0405405	0.0277778	0.0192308	0.03125	0.047619	0.0340909	0.0307692	0.0246914	0.0315789	0.028169	0.0212766	0.0307692	0.029703	0.0394737	0.0294118	0.0365854	0.030303	0.03125	0.0152905	0.028169	0.0449438	0.031746	0.0298507	0.0327869	0.0361446	1	0.0307692	0.0285714	0.0225564	0.0263158
THYM_M1220	0.0338346	0.0313901	0.0257732	0	0.0108696	0.0180995	0.0251046	0.0292887	0.0322581	0.0172414	0.0185185	0.0186916	0.0229008	0.0243902	0.0322581	0.0238612	0.0273973	0.0211268	0.0243902	0.02657	0.0215054	0.0222222	0.0272727	0.0290323	0.0204918	0.0239234	0.0219298	1	0.0316742	0.0218182	0.0150754	0.0305677
THYM_M123	0.0238095	0.0229885	0.0233645	0.020202	0.0238806	0.0202703	0.0238095	0	0.0242915	0.0220994	0.0257732	0.0225989	0.019337	0.0216216	0.025	0.0246914	0.0240385	0.0247934	0.0238095	0.0194805	0.0207612	0.0174419	0.0192308	0.0223752	0.01875	0.0275862	0.03125	1	0.0262009	0.0222222	0.0217391	0.0213904
THYM_M131	0.0344828	0.0258065	0.0413793	0.0334572	0.0246305	0.0204082	0.0291971	0.027027	0.028169	0.0289855	0.0280899	0.0229008	0.0152672	0.0377907	0.0319149	0.0264901	0.0245614	0.0311419	0.0344828	0.0301508	0.0181818	0.0322581	0.0215827	0.0316456	0.0344828	0.0229885	0.024	1	0.025974	0.0217391	0.0232558	0.0230769
THYM_M132	0.0332103	0.0211268	0.0333333	0.0222222	0	0.0277778	0.0206186	0.0205128	0.0307692	0.0169492	0.04	0.0292887	0.0229885	0.0304054	0.0221239	0.0260417	0.025641	0.0217391	0.0222222	0.0289017	0.0359281	0.0292683	0.025641	0.0227273	0.02589	0.0294118	0.0265487	1	0.0314961	0.0229885	0.0236486	0.0196078
THYM_M133	0.0206767	0.0213333	0.0252525	0.013245	0.0238095	0.0208333	0.015674	0.0253968	0.0237389	0.0247191	0.0224719	0.0234542	0.0223577	0.024911	0.0196721	0.0228311	0.018018	0.0190476	0.0206349	0.0335097	0.0312945	0.021148	0.013468	0.0212389	0.0204082	0.0152439	0.0247525	1	0.0238095	0.02977	0.0201342	0.0179104
THYM_M1340	0.0210526	0.0432099	0.0283019	0.0254237	0.0190476	0.0204082	0.0258621	0.029703	0.0288462	0.0275229	0.0239521	0.025	0.0188679	0.0218978	0.0280374	0.0220588	0.0265487	0.025641	0.0239521	0.0234375	0.024	0.019802	0.019685	0.0267857	0.0211268	0.0291262	0.0241935	1	0.027027	0.0263158	0	0.030303
THYM_M1349	0.026087	0.0283688	0.0263158	0.0232558	0.027933	0.0414938	0.0204778	0	0.0225989	0.0324324	0.0241935	0.020202	0.026455	0.0315789	0.0273973	0.0306122	0.0277778	0.0192308	0.033557	0.0283688	0.020202	0.0280374	0.028777	0.024	0.0183486	0.02	0.0336134	1	0.0225564	0.0210526	0	0
THYM_M136	0.021978	0.0273973	0.0224719	0.0285714	0.0277778	0.0158103	0.0246914	0.0319149	0.025	0.0266667	0.0289855	0.0289855	0.0285714	0.0138889	0.0273973	0.0204082	0.0285714	0.0361446	0	0.0379747	0.0348837	0	0.028169	0.028169	0	0.0238095	0.0240964	1	0.0275862	0.04	0.0245902	0.025974
THYM_M1364	0.03125	0.031746	0.0338983	0.0277778	0	0.03125	0.03125	0	0.028777	0	0.0277778	0.0231214	0	0.0240964	0.0327869	0.0336134	0	0.0333333	0.0294118	0.0344828	0.0327869	0.0338983	0.0325203	0.0166667	0.0428571	0.0246914	0.0294118	1	0.030303	0.027027	0.031746	0
THYM_M1370	0.0344828	0.0429448	0.0304878	0.0237154	0.0229885	0.04	0.0310078	0.021978	0.030303	0.0274914	0.0298507	0.0388889	0.0352941	0.0253165	0.033557	0.0347222	0.0345745	0.0224719	0.0224719	0.0397351	0.0318725	0.0413793	0.0325203	0.0386473	0.0296296	0.0305344	0.0441767	1	0.0382514	0.0240964	0.0265957	0.0324074
THYM_M1382	0.0235294	0.0319149	0.03	0.0425532	0.0266667	0	0.0294118	0.025974	0.0291262	0.0275229	0.0322581	0.0266667	0.027027	0.0314465	0.0373832	0.027027	0.0267857	0.0294118	0.0384615	0.027027	0.0277778	0.0253165	0.0277778	0.0306122	0.0366972	0.034188	0.0263158	1	0.0306122	0.0357143	0.032967	0.0315789
THYM_M14	0.0204918	0.0441176	0.039604	0.0376344	0.0298507	0	0.0285714	0.0252525	0.0338983	0.0280899	0.0328283	0.0279898	0.0410256	0.0297952	0.0245902	0.0307692	0.0340426	0.036036	0.0272109	0.0197368	0.028169	0.0323887	0.0210084	0.0344828	0.0364146	0.026616	0.0343511	1	0.0299145	0.0136986	0.0197044	0.0252525
THYM_M140	0.0408163	0.0337079	0.0289855	0.030303	0.0277778	0.031746	0.031746	0.031746	0.0307692	0.0294118	0.027027	0.028169	0.027027	0.0355556	0.0294118	0.0253165	0.0273973	0.0266667	0.015873	0.0283019	0.0384615	0.0204082	0.0285714	0.0291262	0.0252101	0.0319149	0.031746	1	0.025974	0.021978	0.031746	0.0447761
THYM_M1419	0.0301724	0.0243902	0.0251572	0.0185185	0.0135135	0.0216216	0.0217391	0.0294118	0.032967	0	0.0177384	0.0224719	0.0242718	0.0295858	0.0327869	0.0224719	0.0241692	0.0205479	0.0235294	0.0213904	0.0210325	0.0193548	0.0253968	0.0238095	0.0191388	0.0236967	0.0260417	1	0.0322581	0.0251046	0.0130719	0.0204082
THYM_M156	0.027027	0.0267261	0.0242915	0.0163265	0.022293	0.0191781	0.0232975	0.0227273	0.0316092	0.0128205	0.0376712	0.0269058	0.0244499	0.0233546	0.0315789	0.0243902	0.0229592	0.027027	0.0311005	0.0285714	0.0284698	0.0215232	0.0263158	0.025641	0.0174672	0.0225564	0.0265152	1	0.0211382	0.0264317	0.0308824	0.0217391
THYM_M157	0.0258303	0.0353982	0.0362694	0.0333333	0.0295567	0.0296736	0.0259067	0.020339	0.0456621	0.0316456	0.040724	0.0223464	0.0195122	0.0398671	0.0308642	0.0222222	0.0188679	0.0272109	0.0425532	0.0280374	0.0288066	0.0346535	0.027972	0.0241546	0.029703	0.038961	0.021978	1	0.0228426	0.0206186	0.0228571	0.0206897
THYM_M158	0.021978	0.03	0.043956	0.0253165	0.0421053	0.0277778	0.0376344	0.038961	0.0285714	0.0263158	0.0224719	0.038961	0.0309278	0.0229885	0.0365854	0.030303	0.0348837	0.0255319	0.0246914	0.037037	0.0288462	0.0272727	0.028436	0.0229885	0.031746	0.019084	0.0253165	1	0	0.0238095	0.0306122	0.0222222
THYM_M166	0.0232558	0.0223881	0.0255319	0.017094	0	0.0208333	0.0179641	0.021978	0.030303	0.0168067	0.0283688	0.0251572	0.0266667	0.0225564	0.0194805	0.0258621	0.0263158	0.0233918	0.0198675	0.0192308	0.0218978	0.0169492	0.0238095	0.0264901	0.026087	0.015625	0.0232558	1	0.0243902	0.016	0.016	0.0206897
THYM_M170	0.0335821	0.029703	0.026738	0.0209424	0.0193798	0.0119048	0.0179641	0.0315789	0.0231788	0	0.0220588	0.0368664	0.0236967	0.0177994	0.0235294	0.0208333	0.0311526	0.0226131	0.0204082	0.0163043	0.0234742	0.0172414	0.0220994	0.0340136	0.0171674	0.026087	0.0231481	1	0.0275229	0.0193798	0.0326975	0.0207254
THYM_M171	0.0284091	0.0350404	0.0188324	0.0247788	0.0124481	0.0182149	0.028	0.029036	0.0312094	0.0156556	0.021419	0.0294985	0.0403226	0.0423634	0.0311987	0.0306407	0.0257913	0.0275362	0.0311457	0.0248815	0.0358467	0.0155556	0.0276163	0.0425777	0.0155039	0.0329171	0.0387275	1	0.0284939	0.0255517	0.0309951	0.0202429
THYM_M177	0.0238095	0.0243902	0.0357143	0	0.0246914	0.025	0	0.021978	0	0.0247934	0.0152905	0.016	0	0.0210526	0.0235294	0.0240964	0.0186916	0	0	0.0217391	0	0	0.0241935	0.0273973	0.0253165	0	0.0238095	1	0	0.0116279	0.0232558	0.0210526
THYM_M178	0	0.0268456	0.0206186	0	0.0222222	0.0252101	0.025974	0.026087	0.0204082	0.0208333	0	0.0272727	0.0222222	0.0315789	0.0206186	0.0285714	0.0232558	0.0224719	0	0.0227273	0.0215054	0.03125	0	0.0215054	0.0188679	0.0283019	0	1	0.0217391	0.0224719	0	0.0232558
THYM_M180	0.0222222	0.0238095	0.0350877	0.028169	0	0	0.04	0.0465116	0.0408163	0.0232558	0.0235294	0.0405405	0.0377358	0.0232558	0.0379747	0.04	0.0392157	0	0	0.0238095	0.0173611	0.0238095	0.0344828	0	0.0408163	0.0363636	0.0363636	1	0.0186916	0	0	0.0232558
THYM_M191	0.0241935	0.0273973	0.0190476	0.0220588	0.0235043	0.0308642	0.0280374	0.0266667	0.0333333	0	0.0214286	0.0337079	0.0309278	0.0283019	0.0277778	0.025	0.0223881	0.0218978	0.025	0.0238095	0.0260586	0.0198675	0.0183486	0.018018	0.0290698	0.036036	0.0211268	1	0.0262172	0.0181818	0.0186916	0.0238663
THYM_M195	0.0298507	0.0322581	0.0375	0.0172414	0.0350877	0.0285714	0.0344828	0.0461538	0.0357143	0.0384615	0.0327869	0.0337079	0.0322581	0.031746	0.0416667	0	0.021978	0.0344828	0.0491803	0.031746	0.027027	0.0443038	0.0289855	0.031746	0.0384615	0.0169492	0.0357143	1	0.0224719	0.0322581	0.0171821	0.027027
THYM_M196	0.0208333	0.0238095	0.029703	0.0408163	0.0352941	0	0.0377358	0.0243902	0.0377358	0.0363636	0.0273973	0.0425532	0.0243902	0.030303	0.0333333	0.020202	0.0266667	0.0338983	0.0416667	0.0227273	0.0327869	0.0416667	0.0243902	0	0.0206186	0.0444444	0.0377358	1	0	0	0	0.0319149
THYM_M23	0.0437956	0.04	0.0297619	0.025974	0.0211268	0.0225806	0.0326797	0.0287356	0.0436893	0.0218978	0.0430622	0.0233918	0.0402299	0.0410959	0.0308642	0.0368421	0.0418605	0.0260417	0.0366667	0.0197368	0.0373832	0.0331754	0.0467836	0.0288809	0.0299145	0.0238095	0.0324675	1	0.0388889	0.0314961	0.0232558	0.0253623
THYM_M237	0.049505	0.0235294	0.0438596	0.0232558	0	0.0456274	0.0454545	0.0444444	0.0306122	0.0347826	0.0285714	0.0361446	0.0333333	0.045977	0.0307692	0.0252101	0.0275862	0.0238095	0.0252101	0.0373832	0.0413223	0.0357143	0.0408163	0.0449438	0.0238095	0.0361446	0.039548	1	0.0294118	0.0190476	0.030303	0.03
THYM_M26	0.0347222	0.0457143	0.0419162	0.0245399	0.0243902	0.0392157	0.0307692	0.0300752	0.0314961	0.0253165	0.0308642	0.0289855	0.0263158	0.0387597	0.043956	0.0366492	0.026738	0.0238095	0.0211268	0.0331126	0.0304878	0.0305677	0.0294118	0.030303	0.0441176	0.0238095	0.0412844	1	0.038961	0.0357143	0.0211268	0.0291971
THYM_M27	0.0282486	0.0242424	0.0357143	0.0222222	0	0.017094	0.0280899	0.0213904	0.0242718	0.0225564	0.0175439	0.0263158	0.0173913	0.0272109	0.034188	0.0242424	0.0287356	0.0222222	0.0173913	0.034188	0.0295858	0.017094	0.028169	0.0176768	0.017094	0.0173913	0.0252101	1	0.0238095	0.028777	0.0181818	0
THYM_M270	0.040404	0.0384615	0.0263158	0.0238095	0	0	0.0273973	0.0416667	0.0232558	0	0.031746	0.0253165	0.031746	0.0285714	0.03125	0.0238095	0.0363636	0.0275229	0.0344828	0.0217391	0.0166667	0.0294118	0.0298507	0.0175439	0	0.0327869	0	1	0.0357143	0.025641	0.0327869	0.0240964
THYM_M282	0.0274725	0.0280899	0.0243902	0.0193548	0.0244898	0.0231214	0.0285714	0.0248227	0.0224215	0.0205479	0.0297619	0.0215827	0.0202703	0.0278638	0.0242424	0.0206897	0.0296296	0.0322581	0.0285714	0.0197368	0.0299401	0.0295858	0.0289855	0.0228137	0.0289855	0.0218978	0.0271493	1	0.0205479	0.0243902	0.0144928	0.0144928
THYM_M283	0.0306122	0.026087	0.028777	0.0210526	0	0	0.0294118	0.0218579	0.0283019	0.0265487	0.025	0.0363636	0.0227273	0.0310078	0.03	0.0291971	0.0271739	0.0206186	0.027972	0.020202	0.0248756	0.0322581	0.0212766	0.0232558	0.039604	0.0277778	0.025641	1	0.0327869	0	0.0186916	0.0245902
THYM_M304	0.035	0.03125	0.0306122	0.0320856	0.03125	0.0443548	0.0275862	0.0314465	0.0369004	0.0336391	0.038674	0.0288809	0.0254237	0.038835	0.0348259	0.0322581	0.0238095	0.0273973	0.0346821	0.0326797	0.0264317	0.031746	0.0283688	0.0387097	0.0263158	0.030303	0.0380435	1	0.033557	0.0310559	0.0350877	0.031746
THYM_M322	0.0343643	0.0351438	0.034749	0.0289389	0.0242915	0.0257511	0.0363036	0.0226244	0.0321285	0.032967	0.0240964	0.021645	0.0168776	0.0295082	0.0226244	0.0264317	0.038835	0.020979	0.0265781	0.0428016	0.0202703	0.0285714	0.0451128	0.0234375	0.0333333	0.0184332	0.032567	1	0.03125	0.0313589	0.0215385	0.0199203
THYM_M34	0.0338983	0.031746	0.0285714	0	0	0.031746	0.0172414	0.0307692	0.037037	0.0350877	0.0447761	0.031746	0.0215054	0	0	0.0185185	0.028169	0	0.0333333	0.0454545	0	0.03	0	0.0178571	0	0.0377358	0.0379747	1	0.031746	0.0363636	0.0185185	0.0338983
THYM_M352	0.021164	0.0300429	0.0268595	0.0261438	0.019802	0.0231023	0.0215054	0.0227273	0.0229885	0.0166667	0.0242915	0.028436	0.0190476	0.0242718	0.0247934	0.0228571	0.0280374	0.0232558	0.0254237	0.0208333	0.0218341	0.0222222	0.035533	0.0215054	0.0217391	0.0277778	0.0242826	1	0.0246914	0.020979	0.0170648	0.0189573
THYM_M369	0.038835	0.0232558	0.0298013	0.0196629	0.0173611	0.0219941	0.0428571	0.0291262	0.0275591	0.0203046	0.0229008	0.0277778	0.0209524	0.0286738	0.0220994	0.02	0.0451977	0.0215054	0.0221402	0.0318021	0.0229508	0.0198864	0.040625	0.0196721	0.0190114	0.0148699	0.039548	1	0.0172414	0.0204778	0.0176471	0.0298507
THYM_M372	0.0196721	0.024055	0.0224215	0.0174419	0.0243161	0.025	0.0121212	0.0189076	0.0197044	0.0159574	0.0227273	0.0212766	0.0181818	0.0169492	0.0205479	0.0204918	0.02	0.0258621	0.0229508	0.0251256	0.0245098	0.026087	0.0247934	0	0.019305	0.0380117	0.0282258	1	0.0120482	0.0191571	0.02	0.0205128
THYM_M396	0.0208333	0.0199005	0.0196078	0.0185185	0.0142857	0.0192308	0.0204082	0.013986	0.02	0.017316	0.0233645	0.0273224	0.0217391	0.0240964	0.0217391	0.0213904	0.0217391	0.020979	0.025641	0.0248447	0.0217391	0.0245098	0.0194805	0.0135135	0	0.0142857	0.0223214	1	0.0188679	0.0205479	0.0208333	0.0144928
THYM_M398	0.0213904	0.022869	0.0236486	0.0242424	0.0221239	0.0347222	0.0227273	0.0133333	0.0275862	0.030303	0.027027	0.034188	0.0211864	0.0275862	0.0260417	0.0273973	0.031746	0.0222841	0.0285714	0.0275229	0.0179641	0.0194805	0.0215054	0.0335366	0.013986	0.0223464	0.0240964	1	0.01875	0.0212766	0.0243902	0.028777
THYM_M402	0.0339703	0.037037	0.0350195	0.030303	0.0384615	0.0309278	0.0379009	0.0291667	0.039548	0.0333333	0.0307329	0.0238095	0.0234742	0.0390625	0.0382775	0.037594	0.0246305	0.0383387	0.0339506	0.031068	0.0277778	0.0328638	0.0390879	0.0382514	0.0269542	0.0322581	0.031746	1	0.0341463	0.0379404	0.0254237	0.0286885
THYM_M415	0.0470588	0.0266667	0.0416667	0.0379747	0.0277778	0.025641	0.0422535	0.0298507	0.0428571	0.0238095	0.04	0.0493827	0.0461538	0.0384615	0.037037	0.040404	0.0277778	0.0333333	0.0274725	0.0365854	0.0394737	0.0365854	0.0416667	0.0337079	0.0394737	0.032967	0.0410959	1	0.0416667	0.0405405	0.0294118	0.027027
THYM_M423	0.0246914	0.0208333	0.03125	0.03125	0.0149254	0.0240964	0.0273973	0	0.0151515	0.030303	0.0298507	0.0294118	0.0153846	0.0470588	0.025974	0.025	0.028169	0.0289855	0	0.0298507	0.025974	0.0294118	0	0.0155642	0	0.028169	0	1	0.0315789	0	0	0
THYM_M424	0.0307018	0.0378788	0.0397351	0.0187793	0.0190217	0.024	0.0236967	0	0.0229008	0	0.028777	0	0.0288462	0.0272109	0.0192308	0	0.02	0.025641	0.0338983	0.0211268	0.0273224	0.0258065	0.02	0.029703	0.0186916	0.0378788	0.0397351	1	0.0176991	0.020202	0.0268456	0.0247934
THYM_M44	0.0324786	0.0358423	0.0353635	0.0245499	0.0369686	0.0276753	0.0321429	0.020284	0.0305499	0.0197628	0.0323054	0.0290909	0.0246679	0.0338164	0.0189474	0.0310559	0.0294118	0.024055	0.0196078	0.0220884	0.0230216	0.0252101	0.0259542	0.0244798	0.0365135	0.0109649	0.0269906	1	0.038961	0.0250965	0.0136187	0.0171756
THYM_M458	0.037037	0.0392157	0.0384615	0.0384615	0.0384615	0.0384615	0.0377358	0.0322581	0	0.0344828	0.0384615	0.0333333	0.0344828	0.0384615	0	0.0454545	0.0333333	0.0384615	0.0344828	0.0294118	0	0.037037	0.0357143	0	0.0416667	0.04	0.0444444	1	0.037037	0.0178571	0.0121655	0.0357143
THYM_M46	0.0253165	0.0273973	0.0196078	0	0.0153846	0	0.0322581	0	0.0379747	0.015625	0.0294118	0.0319149	0.0263158	0.0190476	0.0266667	0.0289855	0.028169	0.0337079	0.027027	0.0224719	0.0405405	0.0246914	0.025974	0	0.030303	0.031746	0.047619	1	0.0379747	0.028169	0	0
THYM_M461	0.0235294	0.0238095	0.025	0.0215054	0	0.028169	0.025	0.0252525	0.025	0	0.0326087	0.0253165	0.030303	0.0192308	0.0243902	0.0285714	0	0.0246914	0.0298507	0.0253165	0.0243902	0.025	0.0277778	0	0.032967	0.0238095	0.0224719	1	0.0243902	0.0217391	0.025	0.0240964
THYM_M463	0.0285714	0.0130293	0.0263158	0.027027	0.0277778	0.0392157	0.0285714	0.0277778	0.0350877	0.0204082	0.0277778	0.0277778	0.0238095	0.0277778	0.0454545	0.0454545	0.04	0.025	0.0408163	0.0285714	0.030303	0.0298507	0.0263158	0.0263158	0.025641	0.0263158	0.031746	1	0.0277778	0	0.027027	0.0285714
THYM_M480	0.047619	0	0.0208333	0.0227273	0	0.0238095	0.0465116	0.0434783	0.0285714	0.0232558	0	0.0227273	0	0.0344828	0.047619	0.0384615	0.0307692	0.0238095	0	0.0246914	0	0.0444444	0.0185874	0.0192308	0.0294118	0.0238095	0.0232558	1	0.0465116	0.0232558	0	0.0230769
THYM_M482	0.0246914	0.0238095	0.0487805	0.021978	0.0219298	0.0326087	0.025641	0.025641	0.0337079	0.0285714	0.029703	0.0434783	0.047619	0.0333333	0.0224719	0.0229885	0.0347222	0.012987	0.0266667	0	0.0220994	0.0210526	0.0322581	0.0232558	0.0224719	0.0186916	0.0318471	1	0.0253165	0.0394737	0.0235294	0
THYM_M488	0.03125	0.0434783	0	0	0.0322581	0.0454545	0.030303	0	0	0	0	0.047619	0	0.0416667	0.0416667	0.0416667	0.0416667	0.0465116	0.0357143	0.047619	0	0.047619	0.04	0.0434783	0	0.047619	0.0454545	1	0.0434783	0	0	0.0416667
THYM_M51	0.0236088	0.0255906	0.0272109	0.0177165	0.0206186	0.0237389	0.0272	0.0211039	0.0264386	0.0232143	0.0251479	0.0307692	0.0234506	0.0245902	0.0179372	0.0307263	0.0257426	0.0229885	0.0170576	0.0330709	0.0253879	0.0167715	0.0259179	0.014218	0.0201207	0.0153173	0.0412655	1	0.0252525	0.018595	0.0267857	0.0195312
THYM_M517	0.0342205	0.0295359	0.0253623	0.0233918	0.016129	0.0372671	0.0274725	0.02	0.0322581	0.0330882	0.0330882	0.0311526	0.0330579	0.0308057	0.0412621	0.0229358	0.0357942	0.0247678	0.0237389	0.0333333	0.0341615	0.0273973	0.0308123	0.0321429	0.026936	0.0245098	0.0444444	1	0.0299252	0.0298507	0.0348101	0.0386905
THYM_M518	0.0352113	0.0379747	0.027027	0.0361446	0	0.031746	0.0275229	0.0277778	0.0348837	0.0333333	0.0338983	0.04	0.0315789	0.0337838	0.0384615	0.0357143	0.0333333	0.027027	0.0405405	0.0442478	0.0434783	0.0350877	0.025641	0.0322581	0.0306122	0.0291262	0.0288462	1	0.032967	0.0272727	0.0248447	0.0375
THYM_M539	0.0261194	0.0248447	0.0268456	0.0215827	0.0192926	0.0222222	0.0271739	0.0176471	0.0234542	0.0258065	0.0297619	0.0227273	0.019802	0.0251572	0.0298507	0.0276498	0.0274725	0.02	0.0265487	0.0222222	0.0234375	0.0210526	0.021978	0.023622	0.0223881	0.030303	0.0353535	1	0.0295567	0.025974	0.0245098	0.015625
THYM_M557	0.0241935	0.0322581	0.024	0.0420168	0.0213523	0.0196078	0.0234375	0.0194175	0.0232558	0.0277778	0.0252101	0.0263158	0.02	0.0382166	0.0316456	0.0212766	0.0248447	0.027907	0.0307692	0.0263158	0.0223881	0.0289855	0.0204082	0.0241935	0.0296296	0.027972	0.0273973	1	0.0241935	0.0272727	0.025641	0.0273973
THYM_M57	0.0301724	0.022973	0.0313725	0.0268007	0.0165746	0.0228013	0.035343	0.0235479	0.019802	0.0299625	0.0271003	0.0294118	0.0254777	0.0294118	0.0356347	0.0191781	0.0194175	0.0275689	0.0207972	0.0273684	0.0240137	0.0211416	0.0240602	0.0307487	0.0238663	0.0243309	0.0327654	1	0.025463	0.0242424	0.0344828	0.0238095
THYM_M571	0.025641	0.0273973	0.0273973	0.027027	0.0337079	0.0243902	0.0273973	0.025974	0.0253165	0.0277778	0.030303	0.0365854	0.0273973	0.025974	0.025974	0.0253165	0.0285714	0.0253165	0	0.0254237	0.0384615	0.0138889	0.0266667	0.0288462	0.0263158	0.0210526	0.025	1	0.0229885	0.0217391	0.0336134	0.0238095
THYM_M572	0.0232558	0.0275229	0.027907	0.027027	0.019802	0.021978	0.0357143	0.0263158	0.0263158	0	0.0243902	0.0266667	0.043956	0.0333333	0.0337079	0.0357143	0.0263158	0.025641	0.0243902	0.0246914	0.0218978	0.0246914	0.034188	0.0235294	0.0258621	0.0266667	0.025974	1	0.0263158	0.0266667	0.0266667	0.03125
THYM_M588	0.0235294	0.0298507	0.0240964	0.03125	0	0.0161943	0.015625	0.0289855	0.027027	0.0289855	0.031746	0.031746	0.03125	0.0151515	0	0.0149254	0.03125	0.038961	0	0.0410959	0	0	0.0227273	0.0218978	0	0.025641	0.025974	1	0.028777	0.0425532	0.0258621	0.028169
THYM_M59	0.0216606	0.0251397	0.0364146	0.0270758	0.0324324	0.0262726	0.0348525	0.0239411	0.0253521	0.0229645	0.0255591	0.0206186	0.0231362	0.0245098	0.0294785	0.0236559	0.0194175	0.0340633	0.03	0.0295858	0.0210016	0.0346667	0.0291545	0.0296804	0.0272277	0.0158228	0.0224359	1	0.022508	0.0259481	0.0295082	0.020649
THYM_M60	0.0340909	0.0206718	0.026506	0.0175439	0.0181818	0.0220994	0.0381679	0.0255682	0.023569	0.0191083	0.0247788	0.027668	0.021164	0.0248447	0.0197531	0.0174927	0.0403023	0.0186335	0.0191083	0.0276074	0.0260116	0.0203046	0.0358127	0.0172414	0.0163399	0.0128205	0.0352645	1	0.0250569	0.0178571	0.0103806	0.0257235
THYM_M61	0.0176991	0.0215385	0.0217391	0.0179104	0.0220386	0.0254453	0.0178571	0.0196464	0.0211382	0.0135135	0.0191304	0.0189873	0.0185185	0.0148515	0.0184049	0.0216606	0.0214592	0.0225564	0.020649	0.0214592	0.0244565	0.0227273	0.0217391	0.0144928	0.010101	0.040107	0.0248227	1	0.0143541	0.0169492	0.017094	0.0174672
THYM_M633	0.029703	0.0184332	0.0344828	0.0163934	0.015748	0.0234375	0.0264901	0.0300752	0.0170648	0.0186916	0.0225989	0.0166667	0.0189873	0.0205479	0.0254777	0.0327869	0.0238095	0.0251572	0.0208333	0.0245399	0.016	0	0.0245902	0.0196078	0.016129	0.021164	0.028169	1	0.0201342	0.0153846	0.0165289	0.0232558
THYM_M635	0.0457516	0.0272727	0.0350877	0.0338983	0.0210526	0.0344828	0.0384615	0.0275229	0.0327869	0	0.0322581	0	0.0285714	0.0491803	0.0327869	0.0379747	0.0213904	0.0227273	0.0277778	0.0181818	0.017094	0	0.0285714	0	0	0.0192308	0.0153846	1	0.0307692	0.0384615	0	0.0188679
THYM_M647	0.0364964	0.0333333	0	0.0240964	0	0.0363636	0.0192308	0.032967	0.025641	0.0266667	0.037037	0.0294118	0.0176991	0	0.0454545	0.0252101	0.0333333	0.0215054	0.037037	0.047619	0.0243902	0.0182927	0.0363636	0.0377358	0.0298507	0.0307692	0.0392157	1	0.0235294	0.0188679	0.0333333	0
THYM_M649	0.0192308	0.0179641	0.0214286	0.0190476	0.0223881	0.0196078	0.0186335	0.0194175	0.0206897	0.0186916	0.0315789	0.0196078	0.0304878	0.0288462	0.0352941	0.0283019	0.024911	0.0191083	0.0320856	0.0292683	0.0251572	0.0194175	0.0263158	0.023622	0.0223881	0.0296296	0	1	0.038835	0.0267857	0.0226537	0.0338983
THYM_M65	0.03125	0.0454545	0.0350877	0.0272727	0.0451613	0.044335	0.0438596	0.0416667	0.0353535	0.0285714	0.030303	0.0364372	0.0363636	0.0397351	0.0393701	0.0313901	0.0373134	0.0366972	0.0324324	0.0380952	0.0273224	0.0234375	0.0285714	0.0378788	0.0344828	0.028169	0.0409836	1	0.0283019	0.0280374	0.0277778	0.0318471
THYM_M655	0.0269231	0.0372093	0.0384615	0.0359712	0.0303797	0.0306748	0.0266667	0.0211268	0.0480769	0.0340136	0.0428571	0.0238095	0.0206186	0.0414938	0.0235294	0.0233645	0.0147059	0.0289017	0.0268817	0.0295567	0.0301724	0.0366492	0.0216049	0.0255102	0.0314136	0.033557	0.0233918	1	0.0208333	0.0218579	0.0243902	0.0223881
THYM_M670	0.0322581	0.037037	0.0326087	0.0441176	0.0380952	0.0441176	0.0196078	0.030303	0.0258065	0.0294118	0.0352941	0.0273973	0.0315789	0.0298507	0.0276243	0.0224719	0	0.027027	0.030303	0.0288462	0.0421053	0.0314286	0.04	0.0365854	0.0369004	0.0454545	0.0220588	1	0.0305344	0.0212766	0.027027	0.0298507
THYM_M671	0.0361446	0.0301205	0.0393701	0.0263158	0.0295567	0.0243902	0.0393701	0.0353982	0.0373832	0.0454545	0.032967	0.0253165	0.0236686	0.037037	0.0310078	0.047619	0.0326087	0.036036	0.028169	0.0464135	0.0487805	0.031746	0.030303	0.0289855	0.0444444	0.030303	0.0353982	1	0.0421053	0.0350877	0.032967	0.0378151
THYM_M680	0.0344828	0.0266667	0.025641	0.0266667	0	0.0294118	0.025641	0.015528	0.032967	0.025974	0.040404	0.026087	0.0229885	0.025641	0.0267857	0.0266667	0.0275229	0.026178	0.0275229	0.027027	0.0222222	0.0263158	0.0247934	0.0272727	0.0410959	0	0.0245902	1	0.037037	0	0.0240964	0.0210526
THYM_M691	0.0258621	0.0333333	0.0265487	0.0246914	0.021978	0	0.0212766	0.027027	0.0273973	0	0.026087	0.0367647	0.0194175	0.0238095	0.025	0.0208333	0.0352941	0.0204082	0.0275229	0.0232558	0.0206186	0.0275229	0.0306122	0.0328638	0.0210526	0.0198675	0.0378788	1	0.0176991	0.0272727	0.0298507	0
THYM_M692	0.0274725	0.0243902	0.0340909	0.0294118	0	0.025641	0.038961	0.0294118	0.0253165	0.0214286	0.0275229	0.0235294	0.0240964	0.0253165	0.0363636	0.0333333	0.0309278	0.03125	0.025641	0.025641	0.0236967	0.0357143	0.038835	0.025974	0.027972	0.0266667	0.0309278	1	0.0253165	0.0238095	0.0267857	0.0277778
THYM_M693	0.0344828	0	0.03125	0.037037	0	0.030303	0.027027	0.0377358	0	0	0	0.0344828	0.04	0.04	0	0.0377358	0.04	0.0294118	0.04	0.037037	0.0333333	0.04	0.0384615	0.0277778	0	0.0294118	0.04	1	0.030303	0.037037	0.037037	0.04
THYM_M694	0.0334262	0.028169	0.0219124	0.0208333	0.0103093	0.013245	0.0262697	0.0273381	0.0264463	0.0146199	0.0232558	0.0209302	0.0222717	0.0283019	0.0294906	0.0223368	0.0283843	0.0209125	0.0272109	0.0255906	0.0277778	0.0166113	0.0254777	0.0381895	0.017341	0.0264256	0.0247788	1	0.0316901	0.0198864	0.0267857	0.0246914
THYM_M697	0	0.031746	0.0392157	0.0392157	0	0.0322581	0.0204082	0.0277778	0.04	0.0384615	0.0192308	0	0	0.0238095	0	0.0307692	0	0.0322581	0.0344828	0.0246914	0.025641	0	0.0384615	0.0357143	0.0243902	0.0217391	0	1	0.025	0.0204082	0	0.0212766
THYM_M70	0.01875	0.0184332	0.0177515	0.0182927	0.0128205	0.0233918	0.0184049	0.0189873	0.0180723	0.0242424	0.0239521	0.0251256	0.0223642	0.0226415	0.02	0.0197044	0.0194805	0.0188679	0.0263158	0.0225989	0.0234375	0.0301508	0.0191083	0.0194175	0.0185676	0.0251256	0.0208333	1	0.0175439	0.0185185	0.01875	0.012987
THYM_M72	0.02	0.0217391	0.0208955	0.0235294	0.0227273	0.030581	0.0186047	0.0182648	0.0217391	0.0259259	0.0234234	0.029304	0.0222672	0.0221239	0.0221239	0.0216216	0.0263158	0.02267	0.0260521	0.0267559	0.0216216	0.015544	0.0223214	0.0327869	0.0210526	0.0183486	0.0209581	1	0.0107527	0.0166667	0.0197044	0.0224719
THYM_M80	0.0326975	0.0341615	0.0308219	0.0193548	0.027439	0.0282776	0.025641	0.00813008	0.024024	0.0177305	0.0168919	0.0244755	0.0327198	0.0387597	0.0405728	0.0290237	0.027027	0.0241287	0.030303	0.0246711	0.0245902	0.0271186	0.0175439	0.0141844	0.0116279	0.0255474	0.0245399	1	0.034398	0.016129	0.0117188	0.0120968
THYM_M809	0.0416667	0.0392157	0.0294118	0.0416667	0	0	0.0307692	0.0307692	0.0133929	0	0.0363636	0.0243902	0.0363636	0.02	0.0298507	0.0246914	0.0425532	0.029703	0	0.0246914	0.0192308	0.0246914	0.0338983	0.0204082	0.0425532	0.0208333	0	1	0.0363636	0.0275229	0.0322581	0.0212766
THYM_M86	0.0296296	0.0267857	0.0241935	0.0186916	0.0377358	0.0178571	0.0291262	0.019084	0.0208333	0.0245902	0.0294118	0.0204082	0.0285714	0.025	0.037037	0.0285714	0.0247934	0.038674	0.0296296	0.0363636	0.0235294	0.0420168	0.0342466	0.0294118	0.040404	0.017094	0.0230769	1	0.0241935	0.0377358	0.0238095	0
THYM_M886	0.0214286	0.0382514	0.0299539	0.027972	0.0196078	0.0217918	0.0218978	0.0245902	0.024	0.0230769	0.0258065	0.0251572	0.015748	0.0253165	0.028754	0.0252101	0.0300752	0.0266667	0.0212766	0.0201342	0.022293	0.024	0.0218978	0.0225564	0.0298507	0.0241935	0.0246914	1	0.0257732	0.0222222	0.0168067	0.025
THYM_M903	0.0265487	0.0375	0.0496894	0.0327869	0.0284091	0.0330579	0.0393258	0.0298507	0.0382166	0.0223881	0.0314961	0.0288462	0.0192308	0.0320513	0.0326531	0.0324675	0.0305344	0.037037	0.0294118	0.0425532	0.0288462	0.0446927	0.0438596	0.0406504	0.035461	0.0344828	0.0194175	1	0.0353982	0.0232558	0.0258621	0.0272109
THYM_M912	0.0252525	0.0205479	0.0283688	0.0197044	0.0283688	0.0263158	0.0189873	0.0235849	0.0243902	0.0235294	0.0212264	0.0216606	0.0192308	0.0229885	0.019685	0.0215827	0.0228311	0.0263158	0.025	0.0228571	0.0225564	0.030303	0.0201005	0.0196078	0.0189873	0	0.0211416	1	0.0264901	0.0274725	0.0253165	0.0340136
THYM_M92	0.0172414	0.0308642	0.0258621	0	0.0151515	0.0224719	0.0347826	0.0213675	0.0204082	0	0.0234375	0.0263158	0.025	0.0248447	0.0169492	0.0227273	0.0280899	0.0213904	0.0254237	0.0196078	0.0172414	0.0205128	0.028436	0.0197044	0.023622	0.0179856	0.0217391	1	0.0263158	0.0172414	0.0212766	0.0168067
THYM_M920	0.0322581	0.0277778	0.0327869	0.0188679	0.0196078	0.0159363	0.0188679	0.030303	0.0392157	0	0.0357143	0.0307692	0	0.0263158	0.0192308	0.0232558	0.0263158	0	0	0.0344828	0	0.04	0.0333333	0.027027	0.0243902	0.0168776	0.0330579	1	0.0185185	0.028169	0.0192308	0.0350877
THYM_M93	0.0357143	0.0238095	0.0285714	0.0204082	0.0208333	0.031746	0.0212766	0.0208333	0.018018	0.0163934	0.0344828	0.0350877	0.025	0.0234375	0.0357143	0.0357143	0.0322581	0.0232558	0.0327869	0.0212766	0.0344828	0.0416667	0.0294118	0.0344828	0	0	0.031746	1	0.0208333	0	0.0204082	0.0298507
THYM_M956	0.0294118	0.0264901	0.0192308	0	0.0222222	0.0215827	0.0227273	0	0.024	0.0230769	0.03125	0.0298507	0.025641	0.025641	0.0222222	0.0222222	0.0272727	0.0212766	0.03	0.036036	0.0224719	0.0285714	0.0288462	0.0204082	0.0222222	0	0.0287356	1	0.0227273	0.0252101	0.0319149	0.0232558
THYM_M963	0.0222222	0.0248447	0.0223881	0.0289855	0.0251256	0.0383142	0.0191693	0	0.0203046	0.0343137	0.0254777	0.0241935	0.0239234	0.026087	0.0240964	0.0254237	0.037037	0.016129	0.0295858	0.0263158	0.0168067	0.023622	0.0251572	0.0224215	0	0.0263158	0.028777	1	0.015748	0.0263158	0.0220588	0.0155039
THYM_M967	0.025641	0.0217391	0.0322581	0.025	0	0	0.025641	0.0243902	0.0238095	0	0.0416667	0.025	0.025	0.0232558	0.025974	0.0227273	0.025641	0.0243902	0	0.0243902	0.0454545	0.0338983	0.025	0.025	0	0	0	1	0.0377358	0.0350877	0	0
THYM_M98	0.0425532	0.0238095	0.0243902	0.0243902	0	0	0.0384615	0.0212766	0.025	0.0377358	0.030303	0.0217391	0.0273973	0.0416667	0.0322581	0.0444444	0.0465116	0.047619	0.0243902	0.0434783	0.0277778	0.0232558	0.047619	0.0465116	0.0363636	0.0363636	0.0227273	1	0.0357143	0.03125	0.0465116	0.0425532
THYM_M992	0.0266667	0.0222222	0.0344828	0	0.0151976	0.025974	0.0298507	0	0.0166667	0.0333333	0.025641	0.0307692	0.0169492	0.0322581	0.028169	0.027027	0.0307692	0.0277778	0	0.0327869	0.028169	0.0322581	0.0166667	0	0	0.0307692	0	1	0.0337079	0	0.0163934	0
THYM_M994	0.0348259	0.0487805	0.0483871	0	0.0175439	0.0306122	0.0271739	0.024	0.0288462	0	0.025	0	0.025641	0.0333333	0.025974	0.0229885	0.0263158	0.0277778	0.0326087	0.025974	0.0320513	0.03	0.021978	0.0365854	0.025	0.047619	0.0483871	1	0.0232558	0.0277778	0.0352941	0.0319149
UCEC_M165	0.0381679	0.0318471	0.027027	0.0229885	0.0454545	0.020202	0.0258621	0.0336134	0.0446429	0.0396825	0.0409836	0.0198413	0.0212766	0.025974	0.0483871	0.027027	0.0192308	0.0338983	0.0247934	0.0310881	0.0283688	0.0390625	0.0344828	0.03125	0.042735	0.0285714	0.0441176	0.0326797	1	0.0259259	0.0245399	0.0254237
UCEC_M601	0.028169	0.0340909	0.0441176	0.0285714	0.028169	0.0229885	0.0266667	0.0232558	0.0454545	0.0243902	0.025641	0.0298507	0.0266667	0.0375	0.0366972	0.0357143	0.0294118	0.0294118	0.0405405	0.0238095	0.0246914	0.0285714	0.0298507	0.0493827	0.0352941	0.0319149	0.025641	0.0204082	1	0.0294118	0.0277778	0.0298507
UCS_M1137	0.0283019	0.0322581	0.0240964	0.025641	0.024	0	0.0357143	0.0214286	0.0326087	0.03125	0.0212766	0.0243902	0.0214286	0.0288462	0.0352941	0.04	0.0421053	0.040404	0.0306122	0.0363636	0	0.0280374	0	0.0229885	0.0361446	0.0326087	0.0291262	0.0275229	0.0298507	1	0.0208333	0.0252101
UCS_M1138	0.0294118	0.0322581	0.03125	0.0277778	0.03125	0.03125	0.030303	0.03125	0.0294118	0	0.0294118	0.030303	0.0285714	0.030303	0.027027	0.028169	0.03125	0.0294118	0.0277778	0.0285714	0	0.03125	0.030303	0.0465116	0.0322581	0.0277778	0.0294118	0.0363636	0.027027	1	0.0416667	0.0322581
UCS_M1198	0.0207254	0.0238095	0.0191388	0.0126582	0.0178571	0.0184049	0.0213904	0.01875	0.0258303	0.0189873	0.0233463	0.0246914	0.021978	0.0153061	0.0172414	0.0164835	0.017341	0.0207469	0.0228571	0.0188679	0.0239521	0.0153061	0.0167598	0.0210526	0.0177305	0.0203046	0.0229885	0.0216216	0.028169	1	0.0190476	0.0127389
UCS_M1200	0.0294118	0.0379747	0.025	0.0243902	0.0289855	0.0229885	0.0289855	0.0288462	0.0253165	0.0263158	0.0190476	0.032967	0.025641	0.0285714	0.03125	0.0394737	0.0416667	0.0340909	0.0412371	0.037037	0.028169	0.0283019	0.0421053	0.0285714	0.0277778	0.0394737	0.03125	0.0361446	0.0266667	1	0.0149254	0.0394737
UCS_M1229	0.033557	0.0291971	0.0229885	0.0240964	0.025	0.0253165	0.027027	0.0224719	0.0315789	0.0232558	0.025641	0.0253165	0.0357143	0.0344828	0.0266667	0.0263158	0	0.0294118	0.0308642	0.0243902	0	0.0263158	0.025641	0.0231214	0.025	0.0196078	0.0238095	0.0222222	0.025974	1	0.0347222	0.0263158
UCS_M1361	0.0357143	0	0.0384615	0.04	0.0350877	0.037037	0.04	0.037037	0.0357143	0.0434783	0.030303	0	0.0294118	0.0285714	0.0454545	0.0277778	0.037037	0.0277778	0.0344828	0.030303	0.0444444	0.0384615	0.0344828	0.04	0.037037	0.0384615	0.04	0.0333333	0.0344828	1	0.0344828	0.037037
UCS_M1686	0.0333333	0.0238095	0.0350877	0.0377358	0.0357143	0.0238095	0.031746	0.0181818	0.0188679	0.0322581	0.0377358	0.0263158	0.0267857	0.0277778	0.0384615	0.0285714	0.0322581	0.0357143	0.0357143	0.0377358	0.0483871	0.031746	0.0333333	0.0327869	0.0338983	0.0322581	0.0153061	0.0307692	0.0344828	1	0	0
UCS_M1691	0.0289855	0.027027	0.0277778	0.0258621	0.028169	0.0273973	0.0232558	0.0258621	0.0222222	0.0240964	0.0275229	0.0147059	0.0144928	0.0225989	0.0243902	0.025974	0.0142857	0.0285714	0.0215054	0.0277778	0.0149254	0.0263158	0.0229008	0.025974	0.030303	0.02	0.0328947	0.0149254	0.0192308	1	0.0273973	0.030303
UCS_M1692	0.029703	0.0243902	0.0431034	0.0258621	0.0306122	0.034188	0.0326087	0.0253165	0.020979	0.0319149	0.0277778	0.0246305	0.0265487	0.0378378	0.0363636	0.027972	0.027027	0.032967	0.0306122	0.025641	0.027027	0.0289855	0.0217391	0.027027	0.03125	0.025974	0.0333333	0.0266667	0.0375	1	0	0.026087
UCS_M1700	0.0289855	0.0434783	0.028169	0.0344828	0.0227273	0.0222222	0.0263158	0.0273973	0.0253165	0.0363636	0.0238095	0.0416667	0.0238095	0.0347826	0.0405405	0.0232558	0.0333333	0.0344828	0.0227273	0.0238095	0.0232558	0.0238095	0.0289855	0.0238095	0.0238095	0.0294118	0.0246914	0.0327869	0.0350877	1	0.0238095	0.028169
UCS_M1706	0.0410959	0.027027	0.0238095	0.027027	0.0235294	0.025	0	0.0277778	0.0272727	0.0405405	0.0336134	0.025974	0.032967	0.0267857	0.027027	0.0306122	0.0277778	0.0277778	0.0291262	0.0232558	0.0384615	0.0273973	0.0266667	0.0246914	0.0263158	0.030303	0.030303	0.0294118	0.0384615	1	0.0238095	0.0273973
UCS_M1707	0.025	0.0238095	0.0384615	0.025	0.025	0.0384615	0.0273973	0	0.0357143	0.0294118	0.0465116	0.0333333	0.0243902	0.0246914	0.0333333	0.0240964	0.0243902	0.0425532	0.0327869	0.025	0.027027	0.0243902	0.0384615	0.0238095	0.0217391	0.0377358	0.0487805	0.0253165	0.0232558	1	0.025	0.0377358
UCS_M1740	0.0384615	0	0.0357143	0.04	0.04	0.0416667	0.0416667	0.0294118	0.04	0.0416667	0.0416667	0.0322581	0.04	0.0147059	0.0384615	0.04	0.0384615	0.0344828	0.0384615	0.04	0.0232558	0.0416667	0.037037	0.0416667	0.0454545	0.0416667	0.0322581	0	0	1	0.0246914	0.037037
UCS_M1749	0.0327869	0.0127551	0.0338983	0.0327869	0.0384615	0.0204082	0.0333333	0.0212766	0.0240964	0.0267857	0.0294118	0.02	0.0350877	0.0333333	0.0344828	0.0377358	0.0208333	0.0405405	0.0243902	0.02	0.025974	0.0212766	0.04	0.0289855	0.0384615	0	0.0208333	0.02	0.0340909	1	0.0254237	0.0196078
UCS_M1768	0.0454545	0.0222222	0.0434783	0.0454545	0.0416667	0.0434783	0.0333333	0.0253165	0.0416667	0.0454545	0.047619	0.0357143	0.0425532	0.0357143	0.0232558	0.047619	0.04	0.047619	0.04	0.0175439	0.047619	0.0416667	0.00946372	0.037037	0.0454545	0.0454545	0.0416667	0.0434783	0.0294118	1	0	0.0454545
UCS_M1933	0.0425532	0.0408163	0.0434783	0.0408163	0.0204082	0.0212766	0.0416667	0.0289855	0.047619	0.0425532	0.0307692	0.0212766	0.04	0.0217391	0.0246914	0.0425532	0.0408163	0.0377358	0.0338983	0.0240964	0.034188	0.0384615	0.0444444	0.0416667	0.0192308	0.0357143	0.0322581	0.0208333	0.0377358	1	0	0.0333333
UCS_M1947	0	0	0.0454545	0.0416667	0	0.0454545	0.030303	0	0.0416667	0.037037	0.0357143	0	0	0.0333333	0.0340909	0.04	0.037037	0.0338983	0.0333333	0.04	0.0454545	0	0.0434783	0.0384615	0.0344828	0.009375	0.0357143	0	0.0357143	1	0.0416667	0
UCS_M1961	0.0333333	0.0327869	0.0421053	0.0210526	0.0285714	0.03125	0.0428571	0	0.021978	0.0181818	0.0333333	0.0163934	0.032967	0.0365854	0.0337079	0.0337079	0.0298507	0.0434783	0.0361446	0.0392157	0.0243902	0.0310559	0.0208333	0.0384615	0.0263158	0.0273973	0.0289855	0.027027	0.0434783	1	0	0.0261438
UCS_M1993	0.0227273	0.025974	0.0441176	0	0.0357143	0.0240964	0.0294118	0.0204082	0.0294785	0.0238095	0.0375	0.0416667	0.0298507	0	0	0.0289855	0.0327869	0.028169	0.0230769	0.0243902	0.0253165	0.019802	0.0285714	0.0149254	0.0263158	0.0384615	0.0229885	0.0434783	0.037037	1	0	0
UCS_M2059	0.0357143	0.0222222	0.0340909	0.0377358	0.04	0.0444444	0.0277778	0.0377358	0.0493827	0.0232558	0.0384615	0.0232558	0.0408163	0.0454545	0.0454545	0.037037	0.0444444	0.0307692	0.0289855	0.0434783	0.0442478	0.0434783	0.0340909	0.0408163	0.0232558	0.031746	0.04	0.0444444	0.0208333	1	0.0229358	0.0405405
UCS_M271	0.0289855	0.039604	0.037037	0.0288462	0.0307692	0.032967	0.0265487	0.0319149	0.047619	0.0363636	0.0265957	0.037037	0.0341463	0.0416667	0.038961	0.04	0.03	0.0305344	0.0330579	0.0406504	0.0359712	0.0283019	0.0258621	0.04	0.0344828	0.0251256	0.0277778	0.034188	0.0384615	1	0.0190476	0.0247934
UCS_M395	0.0103627	0.0344828	0	0.047619	0	0.047619	0.030303	0.0298507	0.037037	0.030303	0.0277778	0.0434783	0.0384615	0	0.010929	0.0294118	0.0434783	0.0454545	0.0153846	0.047619	0	0	0	0	0	0.04	0.047619	0.047619	0.0344828	1	0	0.0434783
UCS_M487	0.0232558	0.0258621	0.0193548	0.0214286	0.0202703	0	0.0280374	0.0190476	0.026087	0.0252101	0.017094	0.0275862	0	0.0238095	0.0277778	0.0325203	0.0338983	0.0327869	0.0247934	0.0319149	0	0.0277778	0	0.0191083	0.0283019	0.026087	0.0238095	0.0227273	0.0254777	1	0.0211268	0.0211268
UCS_M544	0.0243902	0.0333333	0.0434783	0.0434783	0.0273973	0.0315789	0.0149254	0.0253165	0.0147059	0.030303	0.0206897	0.0273973	0.0454545	0	0.0266667	0.0258621	0.025	0.03125	0.0272727	0.0422535	0.0394737	0.0454545	0.030303	0.0298507	0.0337079	0.0220588	0.0227273	0	0.028169	1	0.0384615	0.0253165
UCS_M548	0.0434783	0.027027	0.0458716	0.0375	0.027027	0.0178571	0.0405405	0.0405405	0.0322581	0.025974	0.037037	0.0294118	0.0171821	0.0344828	0.0280374	0.0285714	0.0357143	0.0338983	0.0357143	0.0294118	0.0204082	0.030303	0.0327869	0.0266667	0.0266667	0.027027	0.0483871	0.0210526	0.0294118	1	0.0319149	0.0394737
UCS_M552	0.03	0.0212766	0.0390625	0.026087	0.025641	0.0205479	0.0306122	0.030303	0.0409836	0.0272727	0.0241935	0.0208333	0.0194175	0.0218978	0.0275229	0.0294118	0.0232558	0.029703	0.0336134	0.0223881	0.037037	0.036036	0.0206897	0.0252101	0.029703	0.0333333	0.028169	0.0298507	0.0316456	1	0.0176991	0.019802
UCS_M553	0.0220588	0.0214286	0.0218978	0.0210526	0	0.0243902	0.0272727	0.0252101	0.0254777	0.026087	0.0208333	0	0	0.0240385	0.0283019	0.0333333	0	0.0309278	0.0243902	0.0152672	0.032	0.0338983	0	0	0.0206186	0.0241935	0	0.0175439	0.0297619	1	0.0215054	0
UCS_M556	0.0483871	0.0447761	0.0428571	0.0296296	0.0169492	0.03125	0.043956	0.0166667	0.0327869	0.0307692	0.0338983	0.038835	0.0294118	0.0327869	0.0322581	0.0422535	0.0434783	0.0430108	0.0342466	0.0375	0.032967	0.04	0.037037	0.0416667	0.0280374	0.0253165	0.0340909	0.0384615	0.030303	1	0.0229885	0.0247934
UCS_M60	0.0359712	0.036036	0.0285714	0.024	0.028436	0.0181818	0.0413793	0.0397351	0.0283688	0.0357143	0.0263158	0.04	0.0217391	0.028777	0.0320513	0.027027	0.0283019	0.0423729	0.0416667	0.0259067	0.0221402	0.025641	0.0306122	0.0251572	0.0392157	0.034965	0	0.0190476	0.0263158	1	0.020979	0.0192308
UCS_M805	0.027027	0.0333333	0.0288462	0.0387597	0.0229885	0.0315789	0.0225989	0.039604	0.0222222	0.0288462	0.0215311	0.0241935	0.0283019	0.0348837	0.0243902	0.0292683	0.0260417	0.0337079	0.0247934	0.0442478	0.01875	0.021978	0.0454545	0.0181818	0.0285714	0.03	0.0273973	0.0227273	0.039604	1	0.0204082	0.0227273
UCS_M85	0.0280374	0.048913	0.0216216	0.010989	0.0108696	0.010989	0.0265957	0.0227848	0.0262009	0.0251256	0.0220264	0.0194175	0.0230415	0.0353535	0.0265957	0.0349127	0.0208333	0.0285714	0.0153846	0.0268199	0.0103627	0.0275591	0.026087	0.0110497	0.04329	0.020202	0.0258303	0.0145631	0.0259259	1	0.0103627	0.0233645
UCS_M850	0.031746	0.0291262	0.0348837	0.037037	0.0333333	0.0322581	0.0285714	0.0234375	0.0350877	0.023622	0.0347222	0.0384615	0.0289855	0.0340909	0.0344828	0.0327869	0.0337079	0.0447761	0.0298507	0.0491803	0.0483871	0.0441176	0.0348837	0.046729	0.038835	0.0394737	0.0322581	0.0405405	0.0350877	1	0.025	0.0289855
UVM_M101	0.027027	0.0285714	0.0352941	0.0265957	0.027027	0.0301887	0.0294118	0.0268456	0.0275862	0.0316456	0.026087	0.017094	0.0272109	0.03125	0.0242215	0.0243902	0.027027	0.0309278	0.0178571	0.0268456	0.0236486	0.027248	0.0315789	0.032	0.0246914	0.0196078	0.0297619	0.0182927	0.025974	0.0238095	1	0.0236967
UVM_M102	0.0243902	0.0263158	0.0322581	0.0267857	0	0	0.0185185	0.0350877	0.0206186	0	0.031746	0.0277778	0.025641	0.031746	0.030303	0.0192308	0.0192308	0.0263158	0.0188679	0	0.0377358	0.0188679	0	0.0333333	0.0192308	0.0333333	0.0240964	0	0.0192308	0.0188679	1	0
UVM_M103	0	0.0344828	0.0277778	0.0307692	0.0344828	0.0392157	0.0277778	0.0344828	0.0128755	0.0227273	0.0338983	0.0363636	0.0465116	0.0298507	0.0222222	0.0212766	0.03125	0	0.0263158	0.0309278	0.0222222	0.0363636	0.037037	0.0416667	0	0.0222222	0.0338983	0.0377358	0.0232558	0.0377358	1	0.0454545
UVM_M1038	0.0288809	0.0363636	0.0264151	0.0253165	0	0.0223464	0.0401929	0.0436364	0.017301	0.021978	0.0244648	0.0321782	0.0266272	0.0302326	0.041841	0.0444444	0.021322	0.0323887	0.0254545	0.0238095	0.0275	0.0438247	0.0240964	0.0340265	0.0226415	0.0236486	0.0352564	0.0280992	0.0311005	0.0339623	1	0.0175439
UVM_M1121	0.0425532	0.0454545	0.0454545	0	0	0.0217391	0.0454545	0.047619	0	0.0379747	0.0373832	0.0319149	0.0291262	0.0408163	0.0425532	0.0454545	0.047619	0.0408163	0.0327869	0.0235294	0.0263158	0.0384615	0.0408163	0.0416667	0.0357143	0.0307692	0.0181818	0.0210526	0.0289855	0.0392157	1	0.0416667
UVM_M120	0.0294118	0.037037	0.0338983	0.0277778	0	0	0.0277778	0.0294118	0.0294118	0.025641	0.0357143	0.027027	0.0243902	0.0344828	0.047619	0.0285714	0.0235294	0.0285714	0.0285714	0.031746	0.025	0.0277778	0.027027	0.03125	0.0285714	0.0192308	0.0357143	0	0.0277778	0.0277778	1	0.0285714
UVM_M122	0	0.03125	0.0384615	0.0212766	0.0222222	0.0454545	0.0217391	0.0210526	0.0208333	0.0298507	0.0307692	0.031746	0.0172414	0.0377358	0.0425532	0.0377358	0.0227273	0.0333333	0	0.0422535	0.030303	0.0222222	0	0.0289855	0.0294118	0.0363636	0.0263158	0.0192308	0.0215054	0.0298507	1	0.0212766
UVM_M1228	0.0310078	0.0282353	0.0310559	0.0176991	0.0347826	0.031746	0.029703	0.0283019	0.0357143	0.0295567	0.0338983	0.0215827	0.0330579	0.0305344	0.018018	0.0238095	0.0363636	0.0344828	0.0315457	0.036036	0.0252525	0.0248447	0.041841	0.0215054	0	0.0351906	0.0215054	0.0218978	0.0197368	0.0337838	1	0.031746
UVM_M1232	0.0243902	0	0.025	0.0416667	0	0.0416667	0.0138889	0	0	0.012605	0.0416667	0.0222222	0.04	0.0145985	0	0	0.0322581	0.0416667	0.015625	0	0.0357143	0.0384615	0.0416667	0.0357143	0.0434783	0	0.0384615	0.027027	0.0384615	0.0333333	1	0
UVM_M1267	0.0416667	0.0416667	0.0416667	0.0434783	0	0	0.0416667	0.0224719	0.0217391	0	0.04	0.0416667	0.0357143	0.0384615	0.0357143	0.04	0.0434783	0.04	0	0	0	0	0.037037	0.0416667	0.027027	0.0357143	0.0416667	0	0.0416667	0.0416667	1	0.0444444
UVM_M1269	0.0327869	0.0384615	0.037037	0.0204082	0	0.0416667	0.0384615	0	0	0.0416667	0.0182927	0.0384615	0	0.025641	0.0384615	0.0176471	0.0350877	0.0322581	0.0176211	0.0357143	0.026455	0.0392157	0.0392157	0.027027	0.0204082	0	0.025641	0	0.0253165	0	1	0.0333333
UVM_M1375	0.032	0.0260664	0.0318471	0.0183486	0.0263158	0.0327869	0.0333333	0.0294118	0.037037	0.0301508	0.0350877	0.0222222	0.034188	0.0314961	0.0186916	0.0245902	0.0377358	0.0357143	0.0318725	0.0373832	0.0257732	0.0254777	0.0425532	0.0212766	0	0.0356083	0.021978	0.0225564	0.0202703	0.0347222	1	0.0324324
UVM_M151	0.0263852	0.0307692	0.0187668	0.0234604	0.0232877	0.0172414	0.0254777	0.0220386	0.0285714	0.0277778	0.0236686	0.0275862	0.0237624	0.0255814	0.0210526	0.0317797	0.0280374	0.0183486	0.0278638	0.0234807	0.0339506	0.0263158	0.0200573	0.0292208	0.0302115	0.00671141	0.0216049	0.0239362	0.0244898	0.0255474	1	0.0179641
UVM_M152	0.0230769	0.0239234	0.0359712	0.0263158	0.0166667	0	0.0291971	0.0258621	0.0165289	0.0209424	0.0178571	0.0243902	0.0215517	0.025	0.0254237	0.0333333	0.0178571	0.0330579	0.0165289	0.0202703	0.0193548	0.0217391	0.0175439	0.025	0.0178571	0	0.0176991	0.0173913	0.0199005	0.0152672	1	0.023622
UVM_M164	0.0382514	0.0360825	0.0423077	0.0375	0.0177778	0.0333333	0.0230415	0.0373832	0.0364583	0.0318182	0.0376344	0.0358127	0.0300752	0.0242718	0.0360825	0.028436	0.0301724	0.0343137	0.026738	0.0260417	0.027668	0.029316	0.0287081	0.0326797	0.037037	0.0108696	0.0238908	0.0257511	0.0376344	0.0340426	1	0.026087
UVM_M165	0.0368098	0.0384615	0.0315789	0.0208333	0.0319149	0.0196078	0.0380952	0.0227273	0.0232558	0.027027	0.0304878	0.0280374	0.0233918	0.0280374	0.0288462	0.0277778	0.0206186	0.03	0.0294118	0.028169	0.03125	0.0366972	0.025641	0.0306122	0.046729	0	0.0210526	0.0408163	0.0325203	0.0347826	1	0.0210526
UVM_M176	0.02746	0.0252809	0.0182292	0.0265018	0	0.00931677	0.0301205	0.0168067	0.0240964	0.0277325	0.019774	0.036961	0.0166667	0.035	0.0244565	0.0321782	0.0301508	0.0239362	0.0290179	0.0259542	0.0353774	0.0211268	0.0169972	0.032316	0.0198511	0.0179641	0.0268908	0.0283186	0.0285261	0.0245902	1	0.0165746
UVM_M179	0.0260417	0.0324074	0.0377358	0.0251572	0.0254545	0.0273973	0.0311804	0.0222222	0.0344828	0.0394737	0.0318584	0.0451613	0.0278293	0.0406321	0.0333333	0.0301887	0.0268456	0.0319489	0.0241935	0.0278638	0.0301205	0.028481	0.0269461	0.0389016	0.0265252	0.0197368	0.024735	0.0217865	0.0284192	0.0303571	1	0.028169
UVM_M180	0.0219298	0.0223881	0.023166	0.021645	0.00900901	0.0135747	0.0227273	0.0280702	0.0197368	0.0294118	0.0180995	0.0280702	0.021978	0.0241379	0.0400844	0.0287958	0.0207469	0.0217391	0.0227273	0.0296684	0.0361757	0.0251799	0.0209059	0.0423077	0.0258065	0.0209059	0.0290456	0.019802	0.0401891	0.0233463	1	0.0262295
UVM_M228	0.0298507	0.0363636	0.030303	0.030303	0.0327869	0.025641	0.028169	0.0307692	0.0322581	0.0307692	0.0357143	0.0410959	0.0267857	0.0361446	0.0361446	0.0375	0.042735	0.0434783	0.0289855	0.040404	0.025641	0.0322581	0.031746	0.0322581	0.0227273	0.015625	0.0333333	0.0273973	0.0257511	0.0298507	1	0.0253165
UVM_M236	0.0316456	0.0327103	0.0292683	0.0224215	0.0111111	0.0197628	0.0482315	0.0195122	0.031746	0.0223214	0.0248227	0.0220386	0.0237154	0.038835	0.0364238	0.0339623	0.0230415	0.0445344	0.021875	0.0275229	0.0272109	0.026699	0.0394737	0.026534	0.0309278	0.0111732	0.0282258	0.0229885	0.023622	0.0218978	1	0.0162162
UVM_M239	0.0442478	0.0258621	0.037037	0.0243902	0	0.0241546	0.0336134	0.0202703	0.0357143	0.031746	0.0322581	0.0324675	0.0330579	0.027933	0.0325203	0.0288462	0.0333333	0.0283019	0.0285714	0.034188	0.0259067	0.032	0.0377358	0.0423729	0.0336134	0.0285714	0.0318725	0.0233236	0.0394737	0.044586	1	0.0367647
UVM_M245	0.03	0.0288809	0.0344828	0.035	0.0467836	0.045977	0.030303	0.0306122	0.030303	0.0322581	0.0352941	0.0361991	0.0298507	0.030303	0.0420712	0.0362903	0.0285714	0.0243902	0.0285714	0.0351759	0.027972	0.0379747	0.0301508	0.0458015	0.0378378	0.0220588	0.0410959	0.0350877	0.0337838	0.0266667	1	0.0239521
UVM_M251	0.0217391	0.0266667	0	0.0196078	0.0285714	0	0.0327869	0.0338983	0.0263158	0.031746	0	0.0377358	0.0227273	0.0232558	0.03125	0	0.03125	0.0333333	0.0350877	0.0315789	0.0277778	0.0273973	0.037037	0.0344828	0.0253165	0.0192308	0.0175439	0.03125	0.025641	0.0204082	1	0.0350877
UVM_M270	0.0248756	0.0323887	0.0301724	0.0152284	0.025	0.0201005	0.0231214	0.025974	0.0314286	0.0218579	0.0275735	0.0266272	0.0277778	0.0247525	0.0228137	0.0238095	0.0218579	0.0320856	0.037037	0.0285714	0.0315789	0.0234742	0.0420712	0.0267559	0.0217391	0.0415648	0.0252427	0.0228013	0.0196078	0.027907	1	0.0257353
UVM_M277	0.0208333	0.0338983	0.0273973	0.0217391	0.0217391	0	0.0422535	0.0363636	0	0.0208333	0.0212766	0.0444444	0.0212766	0.0441176	0.0434783	0.0224719	0.0212766	0.0285714	0.0408163	0.037037	0.0327869	0.0377358	0	0.0425532	0.0238095	0.037037	0.0266667	0.0416667	0.0204082	0.0273973	1	0.0357143
UVM_M28	0.031068	0.0469314	0.0235988	0.0159363	0.0317919	0.0148699	0.0300601	0.0199336	0.0286396	0.0282392	0.0294599	0.0296296	0.025522	0.0272904	0.0272727	0.0315315	0.0226629	0.0319635	0.0352423	0.04	0.0344234	0.0263692	0.037037	0.0300546	0.0152672	0.0464135	0.04	0.0294906	0.0252525	0.0242215	1	0.0217865
UVM_M286	0.036855	0.037037	0.0366972	0.0379747	0.03	0.0243902	0.0309278	0.0379747	0.0366972	0.0247934	0.030303	0.0285714	0.0422535	0.0357143	0.0315789	0.0363636	0.0253165	0.0285714	0.032967	0.0243902	0.0319149	0.027027	0.0287356	0.0352941	0.0340909	0.0301205	0.045977	0.032967	0.0227273	0.0246914	1	0.0275229
UVM_M287	0.0310078	0.0196078	0.0347826	0.0338983	0.032967	0.0327869	0.0338983	0.0252101	0.0307692	0.0340909	0.0333333	0.0285714	0.0348837	0.0322581	0.0283019	0.0388889	0.0361446	0.0338983	0.0361446	0.0338983	0.0298507	0.0344828	0.0373832	0.035533	0.03125	0.0238095	0.0322581	0.0338983	0.0344828	0.0319149	1	0.0333333
UVM_M294	0.0314136	0.0283688	0.0296296	0.0201005	0.0166667	0.0186335	0.0259067	0.0296296	0.0294118	0.0334728	0.03125	0.0281124	0.0227273	0.0326797	0.0347222	0.0412371	0.0236967	0.0239044	0.025	0.0206897	0.0271739	0.0229885	0.0182927	0.0342857	0.0171429	0.0150376	0.0283688	0.0197368	0.0307692	0.0193548	1	0.0266667
UVM_M299	0.0263158	0.0304878	0.0320513	0.018018	0.0230769	0.032	0.0267857	0.018018	0.0241546	0.0224719	0.0223881	0.027027	0.0315789	0.0287356	0.0289855	0.0289855	0.0251572	0.025641	0.0214286	0.0227273	0.0409357	0.0285714	0.0277778	0.0234375	0.028436	0.0273973	0.0295359	0	0.0243902	0.020979	1	0.0211268
UVM_M304	0.0265487	0.0254237	0.0254237	0.0181818	0.018018	0.0229358	0.0187793	0.0172414	0.0228571	0.0254237	0.0337838	0.025641	0.0173913	0.0181818	0.0222222	0.0181818	0.0176991	0.0178571	0.0175439	0.0272727	0.0181818	0.0178571	0.0231481	0.0258621	0.0181818	0.0229008	0.0165289	0.0330579	0.0254777	0.0227273	1	0.0227273
UVM_M306	0.0168067	0.034188	0.0393701	0	0.0175439	0.025	0.0196078	0.0176991	0.0328947	0.0233918	0.0180995	0.0267857	0.0273973	0.0292398	0.0330579	0.0333333	0.0263158	0.0192308	0.0276243	0.0211268	0.0366972	0.0183486	0.0222222	0.027027	0.045045	0.0185185	0.0229008	0.0185185	0.0242424	0.0188679	1	0.0257732
UVM_M310	0.0238095	0.0246914	0.030303	0.0294118	0	0.030303	0.0350877	0	0	0	0.0416667	0.030303	0.030303	0.030303	0.027027	0.037037	0.037037	0.0322581	0.0298507	0	0.0238095	0.038961	0.027027	0	0.025641	0	0	0.0285714	0.0240964	0.0289855	1	0.0322581
UVM_M325	0	0.0217391	0.0365854	0.03	0.0229885	0.030303	0.0310078	0	0.0246914	0.0246914	0.046729	0.0232558	0.0229885	0.03125	0.0204082	0.0267857	0.0386473	0.0235294	0.0306122	0.026087	0.0310078	0.0247934	0.0326087	0.0454545	0.021978	0.0268456	0.0231214	0.0280374	0.0348837	0.0208333	1	0.0246914
UVM_M329	0.0264901	0.028436	0.0352941	0.0232558	0.0174216	0.0280374	0.0285714	0.0365854	0.0352941	0.027027	0.0277778	0	0.0252101	0.0307692	0.0252101	0.0277778	0.0227273	0.030303	0.027972	0.0422535	0.0273973	0.0328638	0.025641	0.043956	0.037037	0.0309278	0.030303	0.028169	0.025	0.0285714	1	0.0222222
UVM_M330	0.0277778	0.0319149	0.0454545	0.0373832	0.0307692	0.0298507	0.025974	0.03125	0.0428571	0.030303	0.0285714	0.0357143	0.0254237	0.0410959	0.0240964	0.0307692	0.0234375	0.028169	0.0298507	0.0298507	0.0190931	0.0224719	0.037037	0.0238095	0.0240964	0.0273973	0.0315789	0	0.0283019	0	1	0.0240964
UVM_M340	0.0252101	0.0359712	0.0384615	0.0288462	0	0.0263158	0.0275229	0.0285714	0.0243902	0.0235294	0.0275229	0.0306122	0.0159363	0	0.0263158	0.037037	0.0309278	0	0.0405405	0.0352941	0	0.025641	0.025	0.0319149	0.0247934	0.0263158	0.0337079	0.0246914	0.0337079	0.032	1	0.037037
UVM_M35	0.0273973	0.0236686	0.0245399	0.0221239	0.0144231	0.0204082	0.0272727	0.0245399	0.0245098	0.0299625	0.025641	0.0252708	0.0201613	0.0276243	0.0290698	0.036036	0.0209205	0.0217391	0.0219561	0.017341	0.026738	0.0280899	0.015625	0.0295567	0.027451	0.0124224	0.0273224	0.0166667	0.0253165	0.0163934	1	0.0224719
UVM_M360	0.0416667	0.0454545	0.0434783	0.047619	0	0.047619	0.047619	0.0333333	0	0	0.0322581	0.0384615	0.047619	0	0	0.0434783	0	0.0434783	0.0434783	0.0416667	0.0384615	0.0416667	0.0416667	0.025	0	0.0384615	0.04	0.0277778	0	0	1	0.047619
UVM_M37	0.0243902	0.0276498	0.0336538	0.0175439	0.0253165	0.0223464	0.0244898	0.0232558	0.027027	0.021645	0.0268817	0.0258824	0.0288066	0.0309735	0.0213675	0.037037	0.0235849	0.0297872	0.0238095	0.0235849	0.0311111	0.029703	0.0195122	0.0231214	0.0292887	0.02	0.024055	0.0196078	0.0169492	0.025641	1	0.017341
UVM_M38	0.037415	0.037415	0.0321637	0.0131148	0.00970874	0.026936	0.0341297	0.026253	0.0202312	0.0237069	0.0306122	0.0212766	0.0257732	0.0372881	0.0375427	0.0372881	0.0282258	0.0341297	0.0275229	0.0338983	0.0207715	0.0232897	0.026936	0.0305085	0.0162866	0.00967742	0.0306122	0.0229226	0.0234542	0.028481	1	0.0301624
UVM_M391	0.0322581	0.0263158	0.028777	0.0215827	0	0.0265487	0.0258621	0.0259259	0.0267857	0.0294118	0.0239521	0.0365854	0.0283688	0.0161812	0.0255102	0.0176991	0.025	0.0225564	0.0268199	0.0192308	0.0230769	0.0188679	0.0273973	0.0170455	0.0214286	0.0198675	0.0215827	0.0190476	0.0289855	0.0181818	1	0
UVM_M416	0.0294118	0.0330579	0.0147059	0.0228571	0.03125	0.0412371	0.03125	0.0307692	0.0285714	0.0142857	0.028169	0.025	0.0322581	0.03125	0.0273973	0.0294118	0.03125	0.0483871	0.0285714	0.0307692	0.027027	0.0298507	0.0285714	0.0444444	0	0.03125	0.0208333	0	0.030303	0.0263158	1	0.0277778
UVM_M419	0.0235294	0.0246914	0.0324675	0.0261438	0.0197368	0.0192308	0.0310078	0.0444444	0.0235294	0.025641	0.033557	0.040404	0.0198675	0.0192771	0.0340909	0.0416667	0.0316456	0.0367347	0.0145985	0.0424242	0.0141844	0.0352423	0.0238095	0.0294118	0.0215827	0.0191083	0.0145985	0	0.0229008	0.0275862	1	0.0255319
UVM_M43	0.0204082	0.0271318	0.0295858	0.0261438	0.031339	0.0194805	0.0324324	0.0144928	0.0323625	0.021978	0.0365854	0.0206897	0.0198238	0.0251572	0.0182927	0.0273224	0.0301887	0.0243902	0.0224719	0.0325203	0.0299401	0.0167598	0.0212418	0.0297619	0.020649	0.0140845	0.0262009	0.0306748	0.039604	0.0214592	1	0.0143885
UVM_M433	0.0375	0.0377358	0.0322581	0.0185185	0	0.030303	0.0162602	0.0350877	0.0322581	0.0384615	0.03125	0.0363636	0.0185185	0.028169	0.0333333	0.031746	0.0185185	0.0357143	0.0246914	0.0188679	0.0172414	0.0188679	0.0298507	0.0243902	0.025	0.021978	0	0.0405405	0.0384615	0.0243902	1	0.0392157
UVM_M451	0.0241935	0.0327869	0.041958	0.0310559	0.0330579	0.036036	0.034965	0.0327869	0.0338983	0.0381679	0.0322581	0.0222222	0.021978	0.032967	0.0241935	0.03125	0.0330579	0.0297619	0.021978	0.0327869	0.026087	0.0282486	0.034188	0.030303	0.0296296	0.0205479	0.028169	0.0215054	0.029703	0.030303	1	0.0271739
UVM_M46	0.0216049	0.0288462	0.0210526	0.0166667	0.0119048	0.0168539	0	0.0403587	0.0307692	0.0174419	0.025641	0.021164	0.037037	0	0.0289017	0.0322581	0.0217391	0.0160428	0.037037	0.0449438	0.019802	0.0120482	0.0289855	0.0218341	0.0220264	0.0220994	0.0200669	0.0200803	0.0268199	0.0333333	1	0.0177515
UVM_M512	0.0357143	0.029703	0.0359712	0.0380435	0.0243902	0.028777	0.04	0.0186567	0.027972	0.0402685	0.0352941	0.044335	0.0181269	0.0361991	0.0314961	0.0334728	0.032	0.0254777	0.024055	0.0338983	0.017094	0.0272109	0.0276243	0.0335821	0.0414508	0.0201005	0.0275591	0.0238095	0.0300752	0.024	1	0.0228571
UVM_M520	0.0243902	0.0307692	0.0222222	0.0208333	0.0217391	0.0246914	0.0352113	0.026178	0.0264901	0.0215827	0.0203252	0.0310078	0.0193548	0.0236686	0.0240385	0.0296296	0.0223881	0.0275862	0.0335196	0.0218978	0.0457516	0.0326087	0.0285714	0.0340909	0.0472973	0.0232558	0.0252366	0.0305344	0.025641	0.0291971	1	0.0253165
UVM_M555	0	0.0254237	0.029703	0.0322581	0	0.026455	0.0232558	0.032967	0.0215827	0.0322581	0.0378788	0.0375	0.0243902	0.0365854	0.0266667	0.039604	0	0.0309278	0.0422535	0.027027	0.0319149	0.0408163	0.045977	0.0333333	0.04	0.0294118	0	0.0336134	0.0267857	0.0353982	1	0.0285714
UVM_M577	0.0314136	0.0299003	0.0169492	0.0273438	0	0.0165563	0.0223214	0.0165017	0.0247748	0.0236052	0.0234114	0.039261	0.0192926	0.0375723	0.0250696	0.0372493	0.0260116	0.0272109	0.0304569	0.0266223	0.0350404	0.0207612	0.0201342	0.0337972	0.0229885	0.0183486	0.0296296	0.027907	0.03125	0.0289389	1	0.0171233
UVM_M578	0.0454545	0.0434783	0.0444444	0.0434783	0	0.0243902	0.0384615	0.04	0.03125	0.0392157	0.0416667	0.0298507	0.0425532	0.0416667	0.0454545	0.0487805	0.0425532	0.0384615	0.0348837	0.0322581	0.0454545	0.0263158	0	0.0350877	0.0384615	0	0.0357143	0	0.0487805	0.0454545	1	0.0333333
UVM_M64	0.0303867	0.0242915	0.025641	0.0177305	0.0218447	0.0176211	0.0289256	0.0334928	0.025641	0.0215517	0.0229008	0.0348837	0.0244565	0.025641	0.0246575	0.0208333	0.0185185	0.0264317	0.0274809	0.0210526	0.0247748	0.0199005	0.0247253	0.0260223	0.025641	0.0227273	0.0205339	0.0309951	0.0213675	0.027027	1	0.0139535
UVM_M662	0.0384615	0.0277778	0.0392157	0.037037	0.0227273	0.0307692	0.0298507	0.0139276	0.0444444	0.0357143	0.0465116	0.0444444	0.0454545	0.0454545	0.0416667	0.0465116	0.0434783	0.046875	0.0227273	0.027027	0.0208333	0.04	0.0425532	0.0425532	0.0227273	0.0246914	0.0208333	0.0222222	0.0322581	0.0454545	1	0.0347222
UVM_M68	0.031746	0.0349345	0.0307692	0.030303	0.0344828	0	0.0327869	0.0273973	0.042735	0.0285714	0.039604	0.0441176	0.0441176	0.030303	0.0483871	0.0493827	0.0344828	0.047619	0.0405405	0.0471698	0	0.0401786	0.030303	0.042328	0.03125	0	0.0227273	0.030303	0.0441176	0.0344828	1	0.0322581
UVM_M74	0.0240964	0.0333333	0.025	0.0210526	0.0253165	0.0357143	0.0319149	0.021978	0.0357143	0	0.0241935	0.0275862	0.028777	0.0275862	0.0227273	0.0283019	0.0253165	0.038961	0.025641	0.025	0.0224719	0.0243902	0.025641	0.04	0	0.0240964	0.0188679	0	0.0246914	0.0232558	1	0.0229885
UVM_M75	0.0190476	0.019802	0.0316901	0.0207254	0.0175439	0.0205128	0.0268456	0.0363636	0.0220264	0.0352564	0.026455	0.041791	0.0157068	0.0218182	0.0338542	0.038961	0.0304569	0.0315789	0.0153061	0.0392157	0.0166667	0.0299625	0.0192308	0.0285714	0.0181818	0.0192308	0.0112994	0	0.0232558	0.0230769	1	0.0225806
UVM_M759	0.0246914	0	0.025641	0.025641	0.0344828	0.0238095	0.0408163	0.0425532	0	0.025641	0.00945626	0	0	0.027027	0.0350877	0	0.0384615	0.0416667	0.0444444	0.0361446	0	0	0.047619	0.030303	0.027027	0.025	0.0222222	0.0384615	0.0243902	0.0172414	1	0.0444444
UVM_M799	0.027027	0.0340136	0.0277778	0.0151515	0.0298507	0.0275862	0.025	0.024	0.0305344	0.027027	0.0299401	0.0189873	0.0285714	0.0266667	0.0179641	0.0206897	0.0310078	0.0296296	0.032967	0.0307692	0.025641	0.0225564	0.046875	0.0284553	0.0150376	0.0362117	0.0237581	0.0205479	0.0235294	0.0299401	1	0.0288462
UVM_M8	0.0292276	0.0337478	0.0245023	0.014862	0.0231729	0.0276243	0.0269504	0.0227964	0.0322981	0.0340741	0.0378457	0.03386	0.0348028	0.0273159	0.0301418	0.03663	0.0377358	0.0307692	0.0266106	0.0355781	0.0262097	0.0309735	0.0289687	0.0276339	0.026534	0.0215517	0.027381	0.0301318	0.0320513	0.0252294	1	0.022449
UVM_M81	0.0434783	0.0392157	0.0465116	0.0465116	0.0319149	0	0	0.0425532	0.0175439	0.0338983	0.0357143	0	0.0350877	0.0333333	0.0227273	0.0122324	0.0416667	0.0224719	0.0454545	0.0238095	0.0363636	0.04	0	0.0238095	0.0322581	0	0.0384615	0.0322581	0.0377358	0.0384615	1	0
UVM_M857	0.0285714	0.0285714	0.0348837	0.0232558	0.0198675	0.029703	0.0227273	0	0.0232558	0.0229885	0.025	0.0348837	0.0301205	0.0266667	0.0263158	0.0333333	0.0298507	0.026087	0.0239234	0.0280374	0.0425532	0.0246914	0.023622	0.0246914	0.0245399	0.0245902	0.028169	0.020202	0.0246914	0.0227273	1	0.0240964
UVM_M863	0.0266667	0.030303	0.0294118	0.0178571	0.0265487	0.0322581	0.03125	0	0.0294118	0.0322581	0.0168539	0.030303	0	0.0217391	0.030303	0.0232558	0.028169	0.0263158	0.0215827	0.0322581	0.0246305	0.0307692	0.032967	0.0227273	0.015873	0	0.0229008	0.0153846	0.0215054	0.0298507	1	0.027027
UVM_M898	0.0294118	0.025	0.027027	0.027027	0.0181818	0.0315789	0.0322581	0.0410959	0.0410959	0.0307692	0.0333333	0	0.0280374	0.0338983	0.028169	0.0333333	0.0263158	0.03	0.0305344	0	0.0327869	0.0348259	0.030303	0.0375	0.036036	0.0285714	0.0357143	0.03125	0.0243902	0.0344828	1	0.0172414
UVM_M927	0.0338983	0.0275229	0.0364583	0.0361446	0	0	0.0353982	0.0357143	0.0454545	0.0309278	0.0215054	0.0424528	0.0224719	0.0322581	0.029703	0.0326087	0.0357143	0.0481928	0.0333333	0.0295567	0.0348837	0.0361446	0.0268456	0.0406504	0.0425532	0.0238095	0.0275229	0.0258065	0.0280374	0.0326087	1	0.03125
UVM_M961	0.0251046	0.0375	0.0243902	0.0230769	0.027027	0.0322581	0.0306122	0.0408163	0.0246914	0.025	0.0410959	0.021978	0.030303	0.0306748	0.0336134	0	0.0222222	0.025974	0.0340909	0.0410959	0.02	0.025	0	0.025974	0.0275229	0.0322581	0.0253165	0.02	0.0243902	0.025974	1	0.0243902
UVM_M968	0.0454545	0	0.0357143	0.0357143	0	0	0.0181818	0.0294118	0.0101523	0	0.0266667	0	0.0176991	0	0.037037	0.0344828	0.0454545	0	0	0	0.02	0.0183486	0.04	0.04	0	0.00632911	0	0.0454545	0	0.047619	1	0
UVM_M982	0.0254777	0.0148148	0.035461	0.0229008	0.0215827	0.020979	0.0326531	0.035503	0.0254777	0.027972	0.0367647	0.0422535	0.0217391	0.0199005	0.0368098	0.0446927	0.0344828	0.0352113	0.016129	0.0460526	0.015625	0.0387597	0.0258065	0.0325203	0.0238095	0.0208333	0	0	0.0218978	0.030303	1	0.027027
UVM_M99	0.0306748	0.029703	0.037037	0.030303	0.0218978	0.0229008	0.0384615	0.0437956	0.0305344	0.0240964	0.0294118	0.0390625	0.0314465	0.0409836	0.0294118	0.0384615	0.0326087	0.0352941	0.0322581	0.0322581	0.0325203	0.027027	0.032967	0.03125	0.029703	0.025974	0.0289855	0.0384615	0.0394737	0.0379747	1	0.025974
ACC_M41	0.0191388	0.0175439	0.0181818	0.0175439	0.0197368	0.0175439	0.0266667	0.0178571	0.0215827	0.0190736	0.0176991	0.017094	0.0296296	0.0222222	0.0357143	0.0176991	0.0247934	0.0196078	0.018018	0.0163934	0.018018	0.0218978	0.017094	0.028169	0	0.0215827	0	0.0176991	0.016129	0.0175439	0.0218978	1
ACC_M50	0.032967	0.0333333	0.0298507	0.0253165	0.019802	0.0169492	0.0263158	0.0263158	0	0.0166667	0.0333333	0.0266667	0.0169492	0.0338983	0.0298507	0.03125	0.0243902	0	0.025974	0.0379747	0.015873	0.025974	0.04	0.0215054	0.0166667	0	0.03125	0.0166667	0.03125	0.0289855	0.027027	1
BRCA_M1021	0.0298913	1	0.0245399	0.0190931	0.0344333	0.0121951	0.0342466	0.021148	0.0339806	0.0272727	0.0261194	0.028169	0.0190931	0.0344371	0.0324826	0.0390071	0.018648	0.020202	0.0248447	0.0235602	0.0332326	0.010101	0.0305011	0.0372414	0.0181818	0.027933	0.00671141	0.0324401	0.0178571	0.0253411	0.0343461	0.0172911
CHOL_M1463	0.028169	0.0182927	0.028169	1	0.0178571	0.0175439	0.027907	0.0285714	0.0298507	0.0416667	0.0365854	0.025974	0.0169492	0.0307692	0.027027	0.0243902	0.0454545	0.0327869	0.0298507	0.0289855	0.0277778	0	0.0253165	0.0350877	0.0265487	0.0375	0.0234375	0.0178571	0.03125	0.0263158	0.0178571	0.027972
CHOL_M1570	0.0264901	0.0272109	0.027027	1	0.0211268	0.0211268	0.038835	0.0347826	0.0277778	0.0350877	0.0375	0.0357143	0.018018	0.0291262	0.036036	0.0490196	0.0267857	0.0330579	0.0316456	0.0190476	0	0.0186916	0.0280374	0.0234375	0.039604	0.0217391	0.0258621	0.0265487	0.0224719	0.0327869	0.018018	0.0254777
DLBC_M498	0.0263158	0.0327869	0	0	0.0222222	1	0.025641	0	0.0243902	0.0350877	0	0.0285714	0.025	0	0.0416667	0.0333333	0.025641	0.0263158	0.0246914	0.0263158	0.025	0.025641	0.025641	0.0188679	0	0.0263158	0.025641	0.0263158	0	0.025641	0.0289855	0.0285714
DLBC_M62	0.0283688	0.0206897	0.0247934	0.031746	0.0166667	1	0.0225564	0.0220588	0.0305344	0.0252101	0.0243902	0.0283688	0.0251572	0.0243902	0.0247934	0.0251572	0.024	0.0222222	0.0245902	0.0204082	0.0211268	0.0247934	0.0413223	0.023622	0.0298507	0.0245902	0.0235294	0.021978	0.0275862	0.0162602	0.0206897	0.0166667
GBM_M363	0.0230769	0.0217391	0.0333333	0.0222222	0	0	0.0294118	1	0.0222222	0.0217391	0.0392157	0.0344828	0.0416667	0.031746	0.0327869	0.0238095	0.0204082	0.025641	0.0416667	0.0217391	0.0208333	0	0.027027	0.0333333	0	0.027027	0.0266667	0.0327869	0.0327869	0.0204082	0.0212766	0.0289855
KICH_M1484	0.0243902	0.0247934	0.0231214	0.0263158	0.0223881	0.0197368	0.0223464	0.0206897	0.0168067	1	0.0461538	0.0197044	0.0193548	0.0185185	0.0234375	0.0216049	0.019084	0.0275229	0.025	0.0178571	0.0234375	0.0193237	0	0.0240964	0	0.0176991	0.0205479	0	0.0218978	0.0188679	0	0
KICH_M188	0.0151515	0.0214592	0.0172414	0.015873	0.0113636	0.0169492	0.0143541	0.0163934	0.011236	1	0.0386029	0.0114286	0.019685	0.0181818	0.0195122	0.0201005	0.0171429	0.0176211	0	0.0194175	0.0166667	0.0210084	0.0213675	0.019084	0.0154639	0	0.0166667	0.0111732	0.0185185	0.0201005	0.0112994	0.0114943
KICH_M192	0.0227273	0.0240385	0.0220588	0.0185185	0	0	0.020979	0.027027	0.0258621	1	0.0238095	0.0261438	0.0227273	0.025	0.0199203	0.0243902	0.018018	0.0378788	0.025	0.0223881	0.0185185	0.0230769	0.0178571	0.0169492	0.017094	0.0225564	0.0224215	0.0234375	0.0250896	0.0272374	0.0183486	0.0265487
KICH_M37	0.025	0.025	0.0245902	0.0190476	0.0267857	0	0.0336134	0.0183486	0.0188679	1	0.0292683	0.0272727	0.0258621	0.0222222	0.0235294	0.0190476	0.03	0.0251256	0.0283019	0.0241935	0.0238095	0.0185185	0.0190476	0.0213675	0.0238095	0.0227273	0.025	0.0253165	0.0272727	0	0	0.023622
KICH_M780	0.025641	0.0235294	0.025	0.0289855	0	0	0.0288462	0.0265487	0.0186335	1	0.0253165	0.0253165	0	0.0240964	0.0183486	0.0319149	0.0277778	0.025641	0.0263158	0.0192308	0	0.0224719	0.0235294	0	0.025641	0	0.0179856	0.021978	0.030303	0.025	0.0258621	0.0266667
KICH_M855	0.0235294	0.023622	0.0223464	0.0253165	0.0214286	0.024	0.0242424	0.0198675	0.016129	1	0.0441176	0.0191388	0.0186335	0.0175439	0.0223881	0.0212121	0.018018	0.026087	0.0238095	0.0172414	0.0223881	0.0187793	0	0.0232558	0	0.0168067	0.019802	0	0.020979	0.0178571	0	0
KIRC_M87	0.0234375	0.0275229	0.0285714	0.03125	0.027972	0.0194175	0.021645	0.0217391	0.0357143	0.0265487	1	0.0306122	0.0233918	0.0403226	0.040404	0.0258621	0.03	0.0211268	0.0314136	0.0208333	0.0449438	0.0253165	0.0254237	0.0434783	0.026455	0.0226244	0.0434783	0.029703	0.0276243	0.0192308	0.0210526	0.0275862
LGG_M1117	0.0175439	0.0298507	0.0333333	0.0277778	0	0.025974	0.0294118	0.0285714	0.0322581	0.030303	0.0172414	0.028169	1	0.0266667	0.0410959	0	0.0175439	0.0322581	0.0298507	0.0340909	0.0333333	0.0338983	0.0235294	0	0	0.019802	0.0235294	0.0178571	0.0229885	0	0.0337079	0
LGG_M186	0.0194805	0.0178571	0.0211864	0.0186335	0.0128205	0.012987	0.0177515	0.0339806	0.0205128	0.0172414	0.0196078	0.0179641	1	0.0188679	0.0167598	0.0223464	0.0160428	0.026455	0.0200401	0.0261438	0.0126582	0.0193548	0.021978	0.0194175	0.0170455	0.012987	0.0174419	0.0165746	0.0204082	0.0129032	0.0243902	0.0129032
LGG_M648	0.0140845	0.0192308	0.0221239	0.0136986	0	0.020202	0.0191083	0.0360825	0.0218579	0.0185185	0.0208333	0.0193548	1	0.0137931	0.0137931	0.0140845	0.0171429	0.02	0.0205339	0.0283688	0.0165746	0.020979	0.0235294	0.0140845	0.0182927	0.0140845	0.01875	0.0177515	0.0217391	0.013986	0.0218579	0.013245
PCPG_M945	0.0298507	0.0289855	0.025641	0.03125	0.0202703	0	0.027027	0.0294118	0.027027	0.0181818	0.03125	0.0347826	0.0285714	0.0441176	0.030303	0.025641	0.03125	0.0185185	0.0194805	1	0.0333333	0.0344828	0.0185185	0.0344828	0.0175439	0.0181818	0.0377358	0.026087	0.0327869	0.0338983	0.0350877	0.0277778
PRAD_M896	0.037037	0.0298507	0.0178571	0.0266667	0	0	0	0.0232558	0.0174672	0.0185185	0.0298507	0.037037	0.0175439	0.030303	0.031746	0	0.0178571	0.031746	0.0294118	0	1	0.0294118	0.0181818	0.0273973	0.0246914	0.0181818	0	0	0	0.0181818	0.025641	0
TGCT_M337	0.0206897	0.0187266	0.0162162	0.0141844	0.0140845	0.0189873	0.0141844	0.0137931	0.0125	0.0143885	0.0143885	0.0140845	0.0182927	0.0142857	0.0186335	0.0205128	0.0133333	0.0143885	0.0144928	0.0143885	0.0140845	0.0141844	0.0140845	0.019685	0.0205479	1	0.0169492	0	0.0141844	0.0205479	0.0196078	0.02
TGCT_M695	0.0198675	0.0287081	0.0191083	0.0285714	0.0207469	0.0285714	0.0252294	0.0254958	0.0190476	0.0179641	0.0307692	0.0202703	0.0175439	0.0229885	0.0232558	0.0183486	0.0222222	0.0278552	0	0.0209424	0.032967	0.0311891	0.0231214	0.0151515	0.0182371	1	0.0188679	0	0.0214286	0.0217391	0	0.0225225
TGCT_M713	0.0487805	0.0344828	0.0357143	0.0344828	0	0.03125	0.0357143	0.0322581	0.0338983	0.0322581	0.0344828	0.0238095	0.0333333	0.0344828	0	0.0344828	0.0333333	0.0294118	0.03125	0.0344828	0.0344828	0.0357143	0.0333333	0.0333333	0.0392157	1	0.0357143	0.03125	0.0357143	0.0384615	0.0266667	0.0333333
TGCT_M991	0.0149254	0.0215054	0.0277778	0.0215054	0	0.0263158	0.0144928	0	0.0227273	0.0149254	0.0222222	0	0	0	0.028169	0.0285714	0.025641	0.025974	0	0.0215054	0.0285714	0.0277778	0.020202	0.0229885	0.0289855	1	0	0	0	0.0196078	0.0298507	0.0149254
THCA_M393	0.0247525	0.0263158	0.0243902	0.0162602	0.0235849	0.0211268	0.0251572	0.0238095	0.025641	0.025641	0.0195599	0.0252525	0.0268456	0.0283688	0.0245902	0.0229008	0.0273973	0.0227273	0.0322581	0.030303	0.0322581	0.0243902	0.025	0.0186335	0.0201613	0.0246305	1	0.0265487	0.0297619	0.0236686	0.0230769	0.0228311
THCA_M527	0.0384615	0.0344828	0.0265487	0.03125	0.0288462	0.0181818	0.031746	0.028169	0.0238095	0.031746	0.0307692	0.0224719	0.0181818	0.027027	0.0344828	0.0188679	0	0.0188679	0.032967	0.0253165	0	0.0350877	0.0344828	0	0.0377358	0.031746	1	0.0350877	0.0190114	0.0185185	0	0.0185185
THYM_M10	0.0177778	0.0211443	0.0113314	0.0106667	0.0110497	0.00849858	0.010989	0.0145631	0.011236	0.00571429	0.0192308	0.013587	0.0084507	0.0127226	0.0149626	0.0125313	0	0.0110497	0.0215463	0.00573066	0.0135501	0.00859599	0.0115274	0.014218	0.0166271	0.0138889	0.0113636	1	0.00859599	0.00573066	0.0110193	0.0163488
THYM_M718	0.0181818	0.025641	0.0208333	0.0170455	0.0194175	0.0263158	0.0283688	0.0294118	0.0235294	0.0240964	0	0.0309278	0.025974	0.025974	0.0238095	0.025641	0.0240964	0.0246914	0.0194175	0.021978	0.020202	0.0361446	0	0.025	0.0215054	0.0265487	0	1	0.0246914	0	0	0.0258621
THYM_M89	0.0322581	0.0306122	0.0229885	0.0232558	0.0309278	0.0223464	0.0288462	0	0.0210526	0.0210526	0.023622	0.0337079	0.0309278	0	0.0204082	0.021978	0.0227273	0.0215054	0.0224719	0.0247934	0.0196078	0.0222222	0.0217391	0.020202	0	0.0215054	0.0196078	1	0	0.021978	0	0
UCS_M1958	0.0357143	0.0273973	0.0338983	0.0291262	0.0177515	0.0333333	0.0190476	0.0294118	0.0229885	0.0175439	0.03125	0.0175439	0.0178571	0.0243902	0.0289855	0.0277778	0.0181818	0.0308642	0.025	0.027027	0.0185185	0.0227273	0.0178571	0.03125	0.018797	0.0229885	0.0359712	0.0185185	0.021978	1	0	0.0377358
UVM_M345	0.0294118	0.023622	0.0333333	0.029703	0	0	0.0305344	0.0307692	0.04	0.0289256	0.018018	0.0391304	0.0186916	0.027027	0.0260417	0.0272727	0.0294118	0.039604	0.0277778	0.0271493	0.0288462	0.029703	0.0239521	0.0396825	0.0357143	0.0196078	0.023622	0.0231214	0.0246305	0.0272727	1	0.0277778
UVM_M47	0.025	0.0198675	0.0299145	0.0264901	0	0	0.0267857	0.0266667	0.0344828	0.0275591	0.0148148	0.0354331	0.0152672	0.0222222	0.027907	0.0223881	0.0238095	0.032	0.0228571	0.0244898	0.0234375	0.024	0.0209205	0.0333333	0.0294118	0.016	0.020202	0.0203046	0.0265487	0.0238095	1	0.0227273
UVM_M534	0.0208333	0.0392157	0.0408163	0	0	0.037037	0.027027	0.031746	0	0	0.0204082	0.0204082	0.0333333	0	0.0344828	0.0357143	0.0208333	0.0208333	0	0.0208333	0.0289855	0.0408163	0.0204082	0.0384615	0.0425532	0	0	0	0.0218978	0.030303	1	0
