# Supplementary material for: Multiscale network modeling reveals the gene regulatory landscape driving cancer prognosis in 32 cancer types
Source: Genome Res. 2023 Oct;33(10):1806–17. doi: 10.1101/gr.278063.123 (PMC10691533; doi:10.1101/gr.278063.123)
Supplement: Supplement 15 [file Supplemental_Table_S9.xlsx]

## Sheet: Supplemental_Table_S9
Supplemental Table S9. The module clusters formed by conserved modules
Module_cluster	Module	Cancer	Layer	Size	Parent	Hub	Function	Hazard_ratio	Survival_p
c1	M438	ACC	4	17	M85	HIST1H4H,HIST1H2BC,HIST1H2BK	CHROMATIN_ASSEMBLY	2.26258	0.0491266
c1	M85	ACC	3	39	M4	HIST1H4H	CHROMATIN_ASSEMBLY	2.8617	0.0140087
c1	M1254	BLCA	5	18	M556		NUCLEOSOME_ORGANIZATION	0.752059	0.0636782
c1	M1255	BLCA	5	12	M556		CHROMATIN_ASSEMBLY	0.900941	0.496013
c1	M1259	BLCA	5	10	M557	HIST1H2AH	NA	0.785466	0.116821
c1	M132	BLCA	3	60	M21		NUCLEOSOME_ORGANIZATION	0.715948	0.0302942
c1	M556	BLCA	4	46	M132		NUCLEOSOME_ORGANIZATION	0.802241	0.151651
c1	M557	BLCA	4	14	M132	HIST1H2AH	CHROMATIN_ASSEMBLY	0.814975	0.183849
c1	M116	BRCA	4	10	M19	HIST1H3B,HIST1H4B	NA	1.03562	0.839049
c1	M19	BRCA	3	56	M2	HIST1H2AM	NUCLEOSOME_ORGANIZATION	1.13184	0.47232
c1	M183	CESC	2	15	M3	HIST1H1B	CHROMATIN_ASSEMBLY	0.81714	0.440548
c1	M49	CESC	2	41	M3	HIST1H3H,HIST1H2BK	NUCLEOSOME_ORGANIZATION	0.932191	0.786193
c1	M500	CESC	3	20	M49	HIST1H2BK	CHROMATIN_ASSEMBLY	0.72027	0.208697
c1	M286	COAD	5	28	M61	HIST1H2BJ	CHROMATIN_ASSEMBLY	1.43006	0.144195
c1	M287	COAD	5	22	M61	HIST1H1E,HIST1H1B	CHROMATIN_ASSEMBLY	1.25338	0.354074
c1	M554	COAD	6	12	M287	HIST1H1B	DNA_REPLICATION_DEPENDENT_NUCLEOSOME_ORGANIZATION	0.877234	0.584938
c1	M61	COAD	4	50	M10	HIST1H2BJ,HIST1H1E	CHROMATIN_ASSEMBLY	1.70297	0.0336011
c1	M106	DLBC	2	23	M2	HIST1H2BK	CHROMATIN_ASSEMBLY	1.21425	0.767165
c1	M1201	DLBC	4	32	M491	HIST1H1B,HIST1H1E,HIST1H2AB,HIST1H4D	CHROMATIN_ASSEMBLY	0.342128	0.128114
c1	M491	DLBC	3	44	M67	HIST1H1B,HIST1H1E	CHROMATIN_ASSEMBLY	0.550757	0.366191
c1	M67	DLBC	2	50	M2	HIST1H1B,HIST1H1E	CHROMATIN_ASSEMBLY	0.550757	0.366191
c1	M451	ESCA	3	26	M72	HIST1H3D	CHROMATIN_ASSEMBLY	1.29673	0.36661
c1	M452	ESCA	3	12	M72	HIST2H4A	NUCLEOSOME_ORGANIZATION	1.17936	0.56076
c1	M453	ESCA	3	15	M72		CHROMATIN_ASSEMBLY	1.6268	0.0912229
c1	M72	ESCA	2	53	M1		NUCLEOSOME_ORGANIZATION	1.63931	0.0872062
c1	M1260	GBM	5	17	M688	HIST1H1C	CHROMATIN_ASSEMBLY	0.942249	0.757094
c1	M1609	GBM	6	23	M1258	HIST1H1E,HIST1H3B	CHROMATIN_ASSEMBLY	0.942446	0.75764
c1	M187	GBM	3	129	M9	SNORA23,HIST1H1E,SNORA74A,HIST1H3B	CHROMATIN_ASSEMBLY	0.905702	0.605967
c1	M687	GBM	4	50	M187	HIST1H1E	CHROMATIN_ASSEMBLY	1.1103	0.5855
c1	M688	GBM	4	25	M187		CHROMATIN_ASSEMBLY	0.969464	0.872135
c1	M1041	HNSC	6	13	M425		CHROMATIN_ASSEMBLY	1.10636	0.465542
c1	M425	HNSC	5	36	M84	HIST1H2BD	NUCLEOSOME_ORGANIZATION	0.983827	0.906853
c1	M426	HNSC	5	23	M84	HIST1H1B	CHROMATIN_ASSEMBLY	1.3657	0.0255325
c1	M84	HNSC	4	59	M13	HIST1H1B,HIST1H2BD	NUCLEOSOME_ORGANIZATION	1.20744	0.175089
c1	M1085	KICH	5	19	M400	HIST1H2BD	CHROMATIN_ASSEMBLY	1.92681	0.353887
c1	M400	KICH	4	32	M59	HIST1H2BD	CHROMATIN_ASSEMBLY	1.19385	0.791822
c1	M401	KIRC	4	29	M92		CHROMATIN_ASSEMBLY	1.72452	0.000566037
c1	M402	KIRC	4	17	M92	HIST1H4H	CHROMATIN_ASSEMBLY	1.28811	0.0998087
c1	M92	KIRC	3	46	M7	HIST1H4H	CHROMATIN_ASSEMBLY	1.95276	2.63765e-05
c1	M980	KIRC	5	16	M401	HIST1H2BF,HIST1H3D	CHROMATIN_ASSEMBLY	1.68564	0.000918062
c1	M981	KIRC	5	13	M401		CHROMATIN_ASSEMBLY	2.24257	6.12185e-07
c1	M363	KIRP	3	11	M61	HIST1H1C,HIST1H2BD	CHROMATIN_ASSEMBLY	1.32156	0.364744
c1	M61	KIRP	2	27	M4		CHROMATIN_ASSEMBLY	2.90402	0.001737
c1	M1121	LGG	6	13	M593	HIST2H2BE	CHROMATIN_ASSEMBLY	2.07057	2.43786e-06
c1	M593	LGG	5	20	M168		CHROMATIN_ASSEMBLY	1.93766	1.50947e-05
c1	M598	LGG	5	12	M168	HIST1H3B	DNA_REPLICATION_DEPENDENT_NUCLEOSOME_ORGANIZATION	1.61343	0.00133769
c1	M140	LIHC	3	16	M10	HIST1H1B,HIST1H1E	CHROMATIN_ASSEMBLY	1.36144	0.0899489
c1	M487	LIHC	4	18	M88		CHROMATIN_ASSEMBLY	0.862883	0.413387
c1	M488	LIHC	4	13	M88	HIST1H3H,HIST1H2AM	CHROMATIN_ASSEMBLY	0.930278	0.688328
c1	M88	LIHC	3	31	M10		CHROMATIN_ASSEMBLY	0.879056	0.474721
c1	M375	LUAD	5	14	M94	HIST1H2BG,HIST1H2AE	CHROMATIN_ASSEMBLY	1.14259	0.401701
c1	M376	LUAD	5	28	M94	HIST1H2AM,HIST1H1C	CHROMATIN_ASSEMBLY	1.41209	0.0308793
c1	M901	LUAD	6	11	M376	HIST1H1C	CHROMATIN_ASSEMBLY	1.5051	0.0113756
c1	M94	LUAD	4	42	M13	HIST1H2AM	CHROMATIN_ASSEMBLY	1.47758	0.0149677
c1	M1318	LUSC	6	12	M577	HIST1H2BK,HIST1H4H	CHROMATIN_ASSEMBLY	0.825346	0.214083
c1	M143	LUSC	4	42	M23		NUCLEOSOME_ORGANIZATION	0.757918	0.0740773
c1	M172	LUSC	4	21	M23	HIST1H2AL	CHROMATIN_ASSEMBLY	0.731032	0.0439039
c1	M577	LUSC	5	21	M143	HIST1H2BK,HIST1H3H	CHROMATIN_ASSEMBLY	0.749497	0.0626585
c1	M578	LUSC	5	11	M143	HIST1H2BG,HIST1H2BF	CHROMATIN_ASSEMBLY	0.877223	0.398672
c1	M579	LUSC	5	10	M143	HIST2H2AA3,HIST2H2BA	NA	0.786106	0.123432
c1	M637	LUSC	5	15	M172	HIST1H2AL	CHROMATIN_ASSEMBLY	0.761217	0.0789739
c1	M1728	MESO	6	41	M1481		NUCLEOSOME_ORGANIZATION	0.563445	0.0232366
c1	M1861	MESO	7	17	M1728		NUCLEOSOME_ORGANIZATION	0.441491	0.00157685
c1	M1862	MESO	7	12	M1728	HIST1H2BF	NA	0.664751	0.104986
c1	M288	MESO	3	13	M17	HIST1H1B	CHROMATIN_ASSEMBLY	1.51021	0.0976204
c1	M1302	OV	6	21	M676	HIST1H4H	CHROMATIN_ASSEMBLY	0.996812	0.983152
c1	M347	OV	4	83	M144	HIST1H1B,HIST1H3B	NUCLEOSOME_ORGANIZATION	0.931297	0.636904
c1	M676	OV	5	26	M347	HIST1H4H,HIST2H2AA3	NUCLEOSOME_ORGANIZATION	1.08767	0.578088
c1	M677	OV	5	33	M347	HIST1H3B,HIST1H1B	CHROMATIN_ASSEMBLY	0.831445	0.222653
c1	M1165	PAAD	5	11	M565		NA	0.966936	0.873845
c1	M1166	PAAD	5	15	M565	HIST2H2BF,HIST2H2AA3	CHROMATIN_ASSEMBLY	1.28164	0.241797
c1	M1449	PAAD	6	10	M1166		NA	1.30587	0.208006
c1	M546	PAAD	4	17	M112	HIST1H4H	CHROMATIN_ASSEMBLY	1.70943	0.0146631
c1	M565	PAAD	4	26	M112	HIST2H2BF,HIST2H2AA3	CHROMATIN_ASSEMBLY	1.49271	0.0598386
c1	M100	PCPG	3	28	M9	HIST1H2AC,HIST1H2BK,HIST1H2BC	CHROMATIN_ASSEMBLY	0.570857	0.232934
c1	M1149	PCPG	5	11	M489	HIST1H2BK	INNATE_IMMUNE_RESPONSE_IN_MUCOSA	0.477293	0.130563
c1	M489	PCPG	4	21	M100	HIST1H2AC,HIST1H2BC	CHROMATIN_ASSEMBLY	0.36176	0.0501251
c1	M1040	PRAD	5	25	M614	HIST1H4H,HIST1H1C	NUCLEOSOME_ORGANIZATION	0.437778	0.136162
c1	M259	PRAD	3	45	M63	HIST1H4H	NUCLEOSOME_ORGANIZATION	0.439492	0.137958
c1	M614	PRAD	4	36	M259	HIST1H4H	NUCLEOSOME_ORGANIZATION	0.393953	0.101403
c1	M482	READ	4	19	M68		CHROMATIN_ASSEMBLY	4.10428	0.0121634
c1	M68	READ	3	47	M9	HIST2H2AA3,HIST1H2AE	CHROMATIN_ASSEMBLY	2.26374	0.0981786
c1	M237	SARC	3	20	M9		CHROMATIN_ASSEMBLY	0.949865	0.804361
c1	M258	SARC	3	12	M9	HIST1H1D	CHROMATIN_ASSEMBLY	1.35471	0.145827
c1	M758	SARC	4	13	M237	HIST1H2BC	CHROMATIN_ASSEMBLY	0.893621	0.588443
c1	M1119	SKCM	4	21	M408	HIST1H2BK	CHROMATIN_ASSEMBLY	1.18786	0.64591
c1	M408	SKCM	3	36	M59	HIST1H2BK	CHROMATIN_ASSEMBLY	1.73035	0.160815
c1	M409	SKCM	3	13	M59	HIST2H2AA3	NA	1.22941	0.586809
c1	M59	SKCM	2	49	M3		CHROMATIN_ASSEMBLY	1.7555	0.149719
c1	M335	STAD	5	10	M47		NA	0.771185	0.140688
c1	M47	STAD	4	29	M9	HIST1H2BO	NUCLEOSOME_ORGANIZATION	0.806641	0.222519
c1	M48	STAD	4	24	M9		CHROMATIN_ASSEMBLY	1.27394	0.166726
c1	M176	TGCT	3	31	M6		NUCLEOSOME_ORGANIZATION	0.680028	0.279363
c1	M690	TGCT	4	12	M176		CHROMATIN_ASSEMBLY	0.737627	0.385771
c1	M312	THCA	5	32	M44	HIST1H1C,HIST1H2AC	CHROMATIN_ASSEMBLY	1.41218	0.246069
c1	M385	THYM	4	40	M66	HIST1H1B,HIST1H2AH,HIST1H3C	CHROMATIN_ASSEMBLY	1.16426	0.733856
c1	M66	THYM	3	46	M5	HIST1H1B,HIST1H2AH,HIST1H3C	CHROMATIN_ASSEMBLY	1.1614	0.737954
c1	M180	UCEC	3	16	M20	HIST2H2BE,HIST2H2AA3	NUCLEOSOME_ORGANIZATION	0.977348	0.916923
c1	M189	UCEC	3	18	M20	HIST1H2BC	CHROMATIN_ASSEMBLY	1.16368	0.494019
c1	M627	UCEC	4	10	M180	HIST2H2BE	NA	0.894554	0.612156
c1	M829	UCEC	4	10	M302	HIST1H1B	NA	0.716099	0.132579
c1	M209	UCS	3	12	M14	HIST2H2AA3	NA	2.13327	0.0337966
c1	M386	UCS	3	14	M57		CHROMATIN_ASSEMBLY	0.623022	0.167013
c1	M268	UVM	3	29	M27	HIST1H3D,HIST1H2BK	CHROMATIN_ASSEMBLY	0.684594	0.458807
c10	M495	BLCA	4	14	M122	ASH2L,LSM1	NA	1.03987	0.798756
c10	M516	BLCA	4	13	M122	FNTA,VDAC3	NA	0.899206	0.488795
c10	M182	BRCA	3	19	M22	ASH2L	SECONDARY_ALCOHOL_METABOLIC_PROCESS	0.957598	0.801557
c10	M252	BRCA	3	13	M22	THAP1	NA	0.878382	0.453881
c10	M1321	ESCA	4	12	M488	BRF2	NA	1.0469	0.870363
c10	M1322	ESCA	4	15	M488		NA	1.87639	0.0358697
c10	M488	ESCA	3	27	M78	GOLGA7	NA	1.05239	0.85568
c10	M560	HNSC	5	10	M114	FNTA	NA	0.765821	0.0572018
c10	M329	LIHC	4	11	M54	FNTA	NA	0.957629	0.81105
c10	M376	LIHC	4	10	M59	ASH2L,LSM1,WHSC1L1	NA	0.844599	0.348806
c10	M1324	LUAD	6	10	M732	BRF2	NA	1.18473	0.28634
c10	M732	LUAD	5	19	M225		NA	1.36275	0.0535993
c10	M212	LUSC	4	26	M25	ASH2L	NA	0.691336	0.0179428
c10	M747	LUSC	5	18	M212	ASH2L	NA	0.714144	0.030284
c10	M1565	OV	7	12	M888		NA	0.945854	0.712614
c10	M521	OV	5	35	M327	ASH2L	NA	0.921124	0.586557
c10	M888	OV	6	23	M521	ASH2L	NA	0.955015	0.761109
c10	M889	OV	6	12	M521	RNF170,VDAC3	NA	0.979841	0.893015
c10	M498	PAAD	4	14	M111	ASH2L	NA	1.0944	0.670692
c10	M528	PRAD	4	18	M244	VDAC3,LSM1	NA	2.5857	0.090553
c10	M486	READ	4	11	M70	PROSC	NA	1.0594	0.900597
c10	M70	READ	3	17	M9	PROSC	NA	1.04725	0.920401
c10	M65	SARC	3	11	M2		NA	1.3958	0.110633
c10	M114	STAD	4	10	M10	ADAM9	NA	0.994487	0.97477
c10	M118	UCS	3	16	M6	FNTA,VDAC3	NA	1.47115	0.265209
c10	M297	UCS	3	10	M35	ASH2L	NA	1.03757	0.913734
c10	M627	UCS	4	10	M118	VDAC3,FNTA	NA	1.52365	0.223766
c100	M142	BLCA	3	100	M21	NDUFA11,FAM108A1,LSM7	NA	0.914848	0.561497
c100	M30	CESC	2	91	M3	NDUFA11,UQCR11,CLPP	RNA_SPLICING_VIA_TRANSESTERIFICATION_REACTIONS	0.508916	0.0128506
c100	M187	ESCA	3	69	M24	NDUFA11,TRAPPC5,FAM108A1	NA	0.658073	0.152331
c100	M83	HNSC	4	107	M13	LSM7,ATP5D,REXO1	NA	0.83122	0.183479
c101	M195	BLCA	3	59	M21	PRPF8	VESICLE_CYTOSKELETAL_TRAFFICKING	1.05398	0.731845
c101	M135	CESC	2	43	M3	PRPF8,ANKFY1	TRANSLESION_SYNTHESIS	1.19467	0.49249
c101	M175	ESCA	3	37	M21	RABEP1	CYTOSOLIC_TRANSPORT	0.786725	0.399763
c101	M119	PCPG	3	84	M9	PRPF8,TSR1,NUP88	NA	1.69281	0.253678
c102	M366	BLCA	5	34	M95	CXCL2,TNFAIP3	CELLULAR_RESPONSE_TO_BIOTIC_STIMULUS	0.97907	0.890163
c102	M206	HNSC	4	15	M21	IL8,CXCL3	CELLULAR_RESPONSE_TO_BIOTIC_STIMULUS	1.09428	0.517171
c102	M158	OV	5	16	M32	CXCL3	RESPONSE_TO_CHEMOKINE	0.965646	0.81716
c102	M404	UCEC	6	10	M80	CXCL3	NA	0.637839	0.0460745
c103	M483	BLCA	4	12	M120	BAT3	NA	0.762632	0.0804628
c103	M1135	BRCA	5	11	M543	BAT3,EHMT2	NA	1.22025	0.24888
c103	M543	BRCA	4	17	M131	BAT3	NEGATIVE_REGULATION_OF_VIRAL_RELEASE_FROM_HOST_CELL	1.3562	0.0785577
c103	M577	PAAD	4	12	M112	BAT3	NA	0.596548	0.0159937
c104	M534	BLCA	4	23	M127	SIVA1	NA	0.879574	0.403163
c104	M1506	HNSC	7	25	M983	C14orf153,SIVA1	NA	1.4251	0.0109632
c104	M1662	HNSC	8	21	M1506	C14orf153,SIVA1	NA	1.42825	0.0105124
c104	M983	HNSC	6	30	M391	C14orf153	NA	1.41606	0.0124896
c105	M757	BLCA	4	12	M187	ZGPAT,ARFGAP1	NA	0.834822	0.23856
c105	M527	CESC	3	17	M57	ZGPAT,PRPF6	NA	0.799297	0.392753
c105	M976	HNSC	6	13	M390	ARFRP1,ARFGAP1	NA	0.968036	0.815404
c105	M586	LUSC	5	18	M146	ZGPAT	NA	1.08194	0.621941
c106	M1344	BRCA	5	14	M784	VPS4B	NA	1.28481	0.150682
c106	M1053	STAD	6	16	M570	KIAA1468	NA	0.988077	0.944956
c106	M1282	STAD	7	10	M1053	KIAA1468,VPS4B	NA	0.932457	0.688122
c106	M570	STAD	5	26	M161		NA	0.832341	0.293008
c107	M181	BRCA	3	18	M22	PGAP3	OTIC_VESICLE_DEVELOPMENT	0.857152	0.374374
c107	M899	OV	6	10	M524	STARD3	NA	1.13052	0.417984
c107	M753	READ	4	10	M194		NA	0.893658	0.807479
c107	M332	STAD	5	10	M46	PGAP3	NA	0.979617	0.905896
c108	M846	BRCA	4	12	M263	SLMO2	NA	0.979746	0.905564
c108	M160	LUAD	4	13	M21		NA	1.05032	0.756831
c108	M478	LUSC	5	23	M118	PSMA7	NA	1.02423	0.876735
c108	M1461	OV	7	10	M801	CSTF1	NA	0.799412	0.140879
c109	M882	BRCA	4	14	M269		NA	1.13299	0.469632
c109	M762	OV	6	10	M482		NA	0.891079	0.451263
c109	M308	UCS	3	21	M37	TGS1	NA	1.14694	0.68715
c109	M913	UCS	4	14	M308	TGS1	NA	1.15711	0.670305
c11	M605	BLCA	4	10	M143	ZNF225	NA	0.806256	0.16011
c11	M1279	BRCA	5	13	M703	ZNF234	NA	0.942135	0.729331
c11	M703	BRCA	4	20	M187	ZNF45	NA	1.06353	0.720939
c11	M1342	CESC	4	10	M645	ZNF227	NA	0.867698	0.583907
c11	M645	CESC	3	25	M98	ZNF224	NA	0.951949	0.850052
c11	M98	CESC	2	34	M3	ZNF224	NA	0.889139	0.653871
c11	M237	ESCA	3	19	M30	ZNF225	NA	0.860249	0.592159
c11	M897	ESCA	4	15	M237	ZNF225	NA	0.965904	0.901551
c11	M1451	GBM	5	13	M854	ZNF45,ZNF227	NA	0.965383	0.85673
c11	M1275	HNSC	6	19	M609	ZNF225,ZNF45	NA	0.788965	0.0896843
c11	M129	HNSC	4	42	M15	ZNF225,ZNF45	NA	0.901732	0.457057
c11	M609	HNSC	5	29	M129	ZNF225,ZNF45	NA	0.874094	0.33336
c11	M141	KIRC	3	23	M9	ZNF225	NA	0.61437	0.00188048
c11	M399	LGG	4	12	M71		NA	1.68008	0.000502792
c11	M1171	LIHC	5	12	M507	ZNF223	NA	0.869618	0.440002
c11	M507	LIHC	4	27	M94	ZNF223,ZNF45	NA	0.907183	0.58932
c11	M694	LUAD	5	18	M221		NA	1.05295	0.746126
c11	M148	LUSC	4	17	M23	ZNF225	NA	1.06651	0.677462
c11	M1250	MESO	4	34	M609	ZNF223,ZNF225	NA	1.16816	0.526991
c11	M1385	OV	7	22	M766		NA	1.01211	0.936509
c11	M476	PAAD	4	10	M111		NA	0.558708	0.00676654
c11	M476	READ	4	17	M67	ZNF227	NA	1.88143	0.17996
c11	M149	SARC	3	17	M7		NA	0.979646	0.92105
c11	M135	STAD	4	22	M11	ZNF230	NA	1.08151	0.653436
c11	M502	STAD	5	17	M135	ZNF230	NA	1.1398	0.454958
c11	M134	UCEC	3	13	M16	ZNF45	NA	1.03323	0.881773
c11	M824	UCS	4	15	M258	ZNF45	NA	1.35492	0.3732
c110	M313	CESC	4	240	M6	PSMB9,TAP1,GBP4,PSMB10,GBP1,IRF1,TNFRSF14,UBE2L6,APOL3,MX1,CMPK2,TRIM22,OAS2,HLA.F,SAMD9L,UBA7	DEFENSE_RESPONSE_TO_VIRUS	0.932499	0.787109
c110	M29	ESCA	2	151	M1	PSMB9,HLA.F,IFIT3,IFI44,IFIT1,IFI44L,XAF1	DEFENSE_RESPONSE_TO_VIRUS	1.3381	0.304113
c110	M18	HNSC	3	280	M4	GBP4,GBP1,IFIT3,PSMB9,C5orf56,TAP1,IRF1,TRIM22,APOL3,IFI44L,OAS2,TNFRSF14,STAT1,CXCL10,HLA.F	DEFENSE_RESPONSE_TO_VIRUS	0.913372	0.514926
c110	M192	HNSC	4	175	M18	IFIT3,PSMB9,GBP1,TAP1,TRIM22,IFI44L,OAS2,HLA.F	DEFENSE_RESPONSE_TO_VIRUS	0.983061	0.902197
c111	M406	CESC	3	11	M22	ATAD1	NA	0.916138	0.734972
c111	M27	COAD	4	10	M8		NA	1.30035	0.275535
c111	M844	OV	6	16	M507	ATAD1	NA	1.0689	0.65863
c111	M711	PRAD	4	12	M284		NA	0.684479	0.472308
c112	M565	CESC	3	45	M71	SAP30BP,MRPL38	NA	1.01183	0.963711
c112	M71	CESC	2	66	M3	MRPL38,SAP30BP	NA	1.0598	0.822181
c112	M503	ESCA	3	51	M83	FAM104A,MRPS7	NA	0.758887	0.332856
c112	M512	OV	5	89	M327	MRPS7,SAP30BP,ICT1,SRP68	NA	0.671259	0.00868612
c113	M77	CESC	2	39	M3	PSMD13	NA	0.947927	0.837091
c113	M197	ESCA	3	23	M24	PSMD13	REGULATION_OF_ESTABLISHMENT_OF_PLANAR_POLARITY	0.990691	0.974485
c113	M1404	LUSC	6	16	M686	RIC8A,MOB2	NA	1.54899	0.00545426
c113	M753	OV	6	21	M481	MOB2	NA	0.826754	0.208438
c114	M966	CHOL	4	14	M304	RPL18,RPL13A	COTRANSLATIONAL_PROTEIN_TARGETING_TO_MEMBRANE	1.49843	0.396018
c114	M815	LGG	5	18	M304	RPL18	COTRANSLATIONAL_PROTEIN_TARGETING_TO_MEMBRANE	1.1073	0.488546
c114	M447	LUAD	5	16	M135	RPL13A,RPS11	COTRANSLATIONAL_PROTEIN_TARGETING_TO_MEMBRANE	1.30871	0.0913307
c114	M1038	LUSC	6	12	M405	RPL13A	NA	0.749238	0.0630932
c115	M239	ESCA	3	15	M30	LOC493754	NA	1.07919	0.786775
c115	M431	LUSC	5	13	M103	RABGEF1	NA	1.05099	0.749229
c115	M669	OV	5	16	M346	C7orf42	NA	1.38066	0.0337056
c115	M840	UCS	4	17	M262		NA	1.06985	0.842913
c116	M21	KIRC	4	25	M4	S100A8	LEUKOCYTE_CHEMOTAXIS	1.25243	0.141938
c116	M109	LGG	4	29	M10	CXCR1,S100A12	ANTIMICROBIAL_HUMORAL_IMMUNE_RESPONSE_MEDIATED_BY_ANTIMICROBIAL_PEPTIDE	1.31993	0.0584913
c116	M485	LGG	5	22	M109	CXCR1,FCGR3B	LEUKOCYTE_CHEMOTAXIS	1.40001	0.0219848
c116	M243	PCPG	5	36	M19	CXCR1,AQP9	POSITIVE_REGULATION_OF_RESPONSE_TO_EXTERNAL_STIMULUS	1.79161	0.214981
c117	M752	KIRC	6	12	M215	KRT6A,KRT6B	CORNIFICATION	1.86561	7.78782e-05
c117	M184	LGG	4	32	M26	KRT6A,KRT6B	CORNIFICATION	1.23376	0.150053
c117	M193	LIHC	4	22	M19	KRT5,KRT6A	CORNIFICATION	1.27723	0.174565
c117	M817	LIHC	5	18	M193	KRT6A	CORNIFICATION	1.37793	0.0757241
c118	M119	LIHC	3	38	M10	SMEK1,RCOR1	NA	1.2439	0.225571
c118	M218	LUSC	4	50	M25	BRF1,AKT1,KIAA0284	NA	1.01372	0.929672
c118	M765	LUSC	5	36	M218	BRF1,AKT1,KIAA0284	NA	1.10686	0.514416
c118	M789	OV	6	45	M494	MARK3,BRF1,WDR20	NA	0.925131	0.605552
c119	M1702	ACC	6	13	M936	MGC29506	NA	0.990849	0.981318
c119	M124	LGG	4	12	M15	FCRL5	NA	1.12076	0.435139
c119	M520	UCS	4	13	M93	FCRL5	NA	0.917868	0.804347
c12	M91	BLCA	4	99	M12	IFIT3,IFIH1,STAT1,IFI44L,IFI44,DDX60	DEFENSE_RESPONSE_TO_VIRUS	0.74482	0.0552063
c12	M15	BRCA	3	107	M2	IFIT3,IFI44L	DEFENSE_RESPONSE_TO_VIRUS	0.928956	0.669552
c12	M442	BRCA	5	66	M88	IFIT3	DEFENSE_RESPONSE_TO_VIRUS	0.975688	0.886503
c12	M88	BRCA	4	77	M15	IFIT3,IFI44L	DEFENSE_RESPONSE_TO_VIRUS	0.946243	0.748729
c12	M1022	CESC	5	66	M313	MX1,CMPK2,OAS2	DEFENSE_RESPONSE_TO_VIRUS	0.772894	0.320129
c12	M77	COAD	4	46	M12	IFIT3,IFI44L,OAS2	RESPONSE_TO_TYPE_I_INTERFERON	1.46506	0.116212
c12	M233	ESCA	3	69	M29	IFI44,IFIT3,IFIT1,XAF1,IFI44L	DEFENSE_RESPONSE_TO_VIRUS	1.02702	0.924564
c12	M888	ESCA	4	35	M233	IFIT3,IFI44L,IFIT1	DEFENSE_RESPONSE_TO_VIRUS	0.95951	0.882998
c12	M78	GBM	4	42	M5	RSAD2,CMPK2,OAS2	RESPONSE_TO_TYPE_I_INTERFERON	1.09373	0.641293
c12	M763	HNSC	5	119	M192	IFIT3,TRIM22,IFI44L,OAS2,GBP1	DEFENSE_RESPONSE_TO_VIRUS	1.01111	0.936649
c12	M184	KIRC	5	14	M20	RSAD2	RESPONSE_TO_VIRUS	1.01397	0.927312
c12	M119	LGG	4	35	M14	OAS2	DEFENSE_RESPONSE_TO_VIRUS	1.45923	0.0101557
c12	M1664	LUSC	7	30	M964	IFI44L,IFIT3	DEFENSE_RESPONSE_TO_VIRUS	0.971893	0.853758
c12	M315	LUSC	5	54	M32	IFI44L,IFIT3	DEFENSE_RESPONSE_TO_VIRUS	1.11907	0.467226
c12	M964	LUSC	6	43	M315	IFI44L,IFIT3	DEFENSE_RESPONSE_TO_VIRUS	1.07477	0.641109
c12	M10	OV	3	158	M2	OAS2,RSAD2,OASL,IFIT3,IFIH1,SAMD9L,PARP14,XAF1,SP100	DEFENSE_RESPONSE_TO_VIRUS	0.916634	0.565152
c12	M63	OV	4	115	M10	OAS2,RSAD2,OASL,IFIT3,PARP14	DEFENSE_RESPONSE_TO_VIRUS	0.855094	0.299916
c12	M79	PAAD	3	66	M10	IFI44L,OAS3,OAS2,IFIT3	DEFENSE_RESPONSE_TO_VIRUS	1.45932	0.0771763
c12	M176	PRAD	4	15	M31	RSAD2	RESPONSE_TO_TYPE_I_INTERFERON	0.776648	0.632873
c12	M31	PRAD	3	34	M2	RSAD2	RESPONSE_TO_TYPE_I_INTERFERON	0.909241	0.854197
c12	M282	READ	5	49	M20	OAS2	DEFENSE_RESPONSE_TO_VIRUS	0.785477	0.591729
c12	M980	READ	6	34	M282	OAS2	RESPONSE_TO_TYPE_I_INTERFERON	0.785477	0.591729
c12	M1093	SARC	4	31	M376	OAS2,OAS1	RESPONSE_TO_TYPE_I_INTERFERON	0.732385	0.136514
c12	M376	SARC	3	100	M32	PARP14,OAS2,IFIH1,OAS1	DEFENSE_RESPONSE_TO_VIRUS	0.594426	0.0138345
c12	M1111	THCA	7	10	M664	CMPK2	NA	1.09999	0.746818
c12	M664	THCA	6	21	M191		RESPONSE_TO_TYPE_I_INTERFERON	0.930576	0.807436
c12	M1178	UCS	5	48	M524	OAS2,RSAD2	DEFENSE_RESPONSE_TO_VIRUS	0.78385	0.474441
c120	M629	ACC	4	11	M134		NA	1.22233	0.611513
c120	M342	LIHC	4	11	M58	SNORD116.28	NA	1.06956	0.709179
c120	M742	SARC	4	10	M230	SNORD116.28	NA	1.28386	0.230982
c121	M1115	BLCA	5	14	M450	ZNF184,ZKSCAN4	NA	0.722813	0.0360651
c121	M774	CESC	3	15	M156	ZNF187,ZKSCAN4	NA	0.996556	0.989375
c121	M723	HNSC	5	13	M178	ZNF187	NA	0.788898	0.0879273
c122	M1229	BLCA	5	11	M532	PRUNE,APH1A	NA	0.926354	0.61842
c122	M532	BLCA	4	24	M126	PRUNE,ZNF687	NA	1.05712	0.717418
c122	M307	UCS	3	15	M36	ZNF687,POGZ	NA	0.570557	0.107319
c123	M1331	BLCA	5	24	M639	UBQLN1	NA	1.25263	0.142094
c123	M1381	CESC	4	10	M708	UBQLN1	NA	1.0852	0.752956
c123	M517	HNSC	5	14	M100		NCRNA_METABOLIC_PROCESS	1.26915	0.0879046
c124	M152	BLCA	3	54	M21	SSB	NCRNA_METABOLIC_PROCESS	0.894114	0.464944
c124	M420	LUSC	5	75	M100	NIF3L1,ZC3H15	CELLULAR_RESPIRATION	0.910125	0.54962
c124	M500	OV	5	85	M327	ZC3H15	NA	0.95489	0.759086
c125	M155	BLCA	3	113	M21	REXO4,COBRA1,MRPS2,WDR5,TMEM203	DNA_CATABOLIC_PROCESS_ENDONUCLEOLYTIC	0.881027	0.410732
c125	M54	ESCA	2	126	M1	COBRA1,SSNA1,C9orf114,DPM2	NA	0.533847	0.0351613
c125	M26	LIHC	3	126	M7	SSNA1,EDF1,PSMB7,DPM2	CHAPERONE_COFACTOR_DEPENDENT_PROTEIN_REFOLDING	1.19782	0.324119
c126	M182	BLCA	3	56	M21	PPP1R7	NA	0.913645	0.555122
c126	M24	CESC	2	47	M3		NA	0.854068	0.542628
c126	M376	HNSC	5	37	M78		PROTEIN_DENEDDYLATION	0.866466	0.302485
c127	M196	BLCA	3	23	M21	MRPL13	TRANSLATIONAL_INITIATION	1.11121	0.491327
c127	M1156	PAAD	5	11	M556	MRPL13	NA	1.18729	0.419517
c127	M408	READ	4	13	M51		NA	1.18737	0.702738
c128	M427	BLCA	4	15	M117		NA	0.847941	0.281784
c128	M691	LUSC	5	21	M195	ZNF471	NA	1.22604	0.189806
c128	M1433	SARC	5	25	M936	ZNF793	NA	1.2291	0.323874
c129	M476	BLCA	4	20	M118	ATP5L	NA	0.997689	0.987953
c129	M1023	HNSC	6	15	M413	ATP5L,TIMM8B	NA	1.04708	0.741329
c129	M452	SARC	4	23	M80	ATP5L	NA	0.913629	0.663795
c13	M218	BRCA	3	48	M22	CUL4A,TUBGCP3,CDC16	NA	1.05205	0.768506
c13	M767	BRCA	4	33	M218	CUL4A,TUBGCP3,TFDP1	NA	1.0534	0.762913
c13	M768	BRCA	4	15	M218		NA	0.872839	0.434451
c13	M604	CESC	3	22	M83	ARHGEF7,CUL4A	NUCLEOTIDE_EXCISION_REPAIR	1.32069	0.288337
c13	M83	CESC	2	39	M3	CUL4A,ARHGEF7	NA	1.22549	0.435691
c13	M260	COAD	5	29	M57	CUL4A,CDC16	NA	1.09362	0.709336
c13	M1240	ESCA	4	10	M443	PCID2	NA	0.959031	0.882119
c13	M1241	ESCA	4	25	M443	ERCC5,TPP2	REGULATION_OF_GTP_BINDING	1.37008	0.26563
c13	M443	ESCA	3	41	M69		NA	1.05243	0.855598
c13	M1334	HNSC	6	25	M701	TPP2,TM9SF2	POSITIVE_REGULATION_OF_NUCLEOCYTOPLASMIC_TRANSPORT	1.27684	0.0788298
c13	M167	HNSC	4	42	M15	TPP2	ICOSANOID_BIOSYNTHETIC_PROCESS	1.24944	0.109511
c13	M701	HNSC	5	31	M167	TPP2	ICOSANOID_BIOSYNTHETIC_PROCESS	1.26954	0.0863043
c13	M702	HNSC	5	11	M167	PCID2	NA	1.20503	0.179023
c13	M104	LIHC	3	30	M10	CUL4A	NA	1.07446	0.691574
c13	M540	LIHC	4	22	M104	CUL4A,PCID2	NA	1.16637	0.396853
c13	M1262	LUAD	6	11	M695	CUL4A	NA	1.00956	0.9521
c13	M695	LUAD	5	21	M221		NA	0.835145	0.256912
c13	M157	LUSC	4	21	M23	CDC16	NA	1.08796	0.585809
c13	M603	LUSC	5	11	M157	CUL4A	REGULATION_OF_CELL_CYCLE_PHASE_TRANSITION	0.840167	0.261543
c13	M629	MESO	3	24	M110	CUL4A	NA	0.899874	0.667807
c13	M1079	OV	6	25	M586	CUL4A	NA	1.35999	0.0421258
c13	M341	OV	4	61	M143	CUL4A	NA	1.39522	0.0274887
c13	M586	OV	5	39	M341	CUL4A	NA	1.49491	0.0081599
c13	M161	SARC	3	12	M7	DCUN1D2,PCID2	REGULATION_OF_CELL_CYCLE_PHASE_TRANSITION	1.37223	0.131211
c13	M142	STAD	4	31	M11	CUL4A	NA	1.03759	0.831771
c13	M355	UCS	3	36	M48	CUL4A,PCID2	UNSATURATED_FATTY_ACID_BIOSYNTHETIC_PROCESS	0.843977	0.616852
c13	M976	UCS	4	11	M355	CDC16,DCUN1D2	NA	1.22667	0.550769
c130	M635	BLCA	4	13	M145	WDR20	NA	1.13089	0.422211
c130	M478	ESCA	3	14	M76	CPSF2	RNA_POLYADENYLATION	0.709588	0.23618
c130	M1246	LIHC	5	13	M577	SMEK1	NA	1.28253	0.168379
c131	M763	BLCA	4	26	M188	COG3	NA	0.889081	0.44353
c131	M1409	OV	7	17	M777	WBP4	NA	1.15292	0.344593
c131	M443	UCS	3	19	M76	FAM48A	NA	1.4008	0.330959
c132	M1256	BRCA	5	17	M665	RBAK,CDK13	NA	1.23077	0.233259
c132	M418	LIHC	4	21	M67	KLHL7,RBAK,SNX13	NA	0.932769	0.700242
c132	M132	STAD	4	14	M11	ZNF12,SNX13	NA	1.05629	0.752812
c133	M1269	BRCA	5	10	M677		NA	0.906466	0.569879
c133	M1587	OV	7	10	M898	PHB	NA	0.790258	0.119638
c133	M898	OV	6	24	M524		UTP_BIOSYNTHETIC_PROCESS	0.697951	0.0177871
c134	M1298	BRCA	5	13	M729	ATP5G2	NA	0.817006	0.243862
c134	M1045	LUSC	6	14	M407	ATP5G2,C12orf10,TARBP2	NA	0.855937	0.316989
c134	M274	STAD	5	18	M30	C12orf10,TARBP2,CNPY2	NEGATIVE_REGULATION_OF_IMMUNE_EFFECTOR_PROCESS	0.924279	0.651815
c135	M1307	BRCA	5	15	M740	TAF9,MRPS36	DNA_TEMPLATED_TRANSCRIPTION_TERMINATION	0.67867	0.0276267
c135	M396	HNSC	5	18	M81	TAF9	DNA_TEMPLATED_TRANSCRIPTION_TERMINATION	1.04651	0.743375
c135	M655	PRAD	4	13	M274	TAF9	NA	1.38425	0.538614
c136	M1465	BRCA	7	14	M953		CORNIFICATION	0.808164	0.218662
c136	M238	CESC	3	10	M5	KLK10,KLK8	NA	1.17876	0.525973
c136	M71	LUSC	4	13	M15		CORNIFICATION	1.38946	0.0335829
c137	M197	BRCA	3	19	M22	INTS4,NDUFC2	NA	0.921617	0.635793
c137	M407	HNSC	5	10	M82	NARS2,ALG8	NA	1.00574	0.967099
c137	M503	OV	5	33	M327	INTS4,RSF1	NA	0.964432	0.810165
c138	M211	BRCA	3	20	M22	ERAL1	NA	0.83884	0.311906
c138	M1540	OV	7	11	M868	SDF2	NA	0.797475	0.134511
c138	M868	OV	6	30	M516		NA	1.15951	0.327963
c139	M438	BRCA	5	15	M84	ZNF773	NA	1.00403	0.981364
c139	M610	HNSC	5	13	M129	ZNF419,ZNF211	NA	1.0137	0.921813
c139	M206	STAD	5	16	M16	ZNF773,ZNF419	NA	1.37642	0.071841
c14	M567	ACC	4	15	M132	KDM5D,UTY	NA	1.05482	0.893122
c14	M206	BLCA	3	22	M22		PROTEIN_DEMETHYLATION	0.829124	0.223963
c14	M808	BLCA	4	11	M206	CYorf15B	NA	0.748192	0.0612522
c14	M124	CHOL	3	33	M6	CYorf15B	PEPTIDYL_GLUTAMIC_ACID_MODIFICATION	1.96384	0.164329
c14	M542	DLBC	3	11	M80	UTY,KDM5D	NA	2.64644	0.158898
c14	M541	ESCA	4	10	M94	ZFY	NA	1.09884	0.736744
c14	M94	ESCA	3	20	M2		TRANSLATIONAL_INITIATION	0.731735	0.272331
c14	M227	HNSC	4	11	M27	UTY	NA	0.665101	0.00385274
c14	M27	HNSC	3	25	M7		NA	0.700507	0.0110193
c14	M19	KICH	3	15	M3	UTY,USP9Y	NA	3.94109	0.0875327
c14	M17	KIRC	4	19	M4	UTY	NA	1.23698	0.164513
c14	M432	KIRP	4	16	M71	CYorf15A	NA	1.18646	0.578008
c14	M88	LGG	3	17	M6	KDM5D	NA	0.883979	0.400776
c14	M70	LIHC	3	14	M10	DDX3Y	NA	0.769845	0.149802
c14	M680	LUAD	5	17	M221	USP9Y,UTY,CYorf15A	NA	1.13486	0.42578
c14	M133	LUSC	4	27	M23	UTY	PRESYNAPTIC_MEMBRANE_ASSEMBLY	0.965672	0.821979
c14	M22	MESO	2	17	M2	CYorf15A	NA	0.503851	0.00635543
c14	M442	PAAD	4	17	M111	UTY,CYorf15A	NA	0.940612	0.773496
c14	M140	PCPG	3	14	M10	UTY	NA	1.44263	0.426687
c14	M308	SARC	3	17	M25		NA	0.742648	0.157176
c14	M72	SKCM	2	19	M3	CYorf15A,UTY	NA	1.01086	0.976849
c14	M199	STAD	5	11	M16	CYorf15A	NA	1.3679	0.0733646
c14	M186	TGCT	3	15	M6	UTY	NA	1.01685	0.961348
c14	M56	THCA	4	15	M7	CYorf15A	NA	2.09158	0.0172668
c14	M442	UVM	4	12	M92	DDX3Y	NA	0.486824	0.157162
c14	M92	UVM	3	19	M7	UTY	NA	0.314863	0.0325997
c140	M513	BRCA	4	20	M126		NA	1.22641	0.23727
c140	M803	OV	6	25	M497	SS18L1,YTHDF1	NA	0.853544	0.296884
c140	M51	STAD	4	37	M9	GTPBP5,TAF4	NA	0.96254	0.826036
c141	M801	BRCA	4	10	M235	STT3A	NA	1.04396	0.803869
c141	M161	KIRP	3	14	M16	ARCN1	ENDOPLASMIC_RETICULUM_TO_GOLGI_VESICLE_MEDIATED_TRANSPORT	0.928728	0.808563
c141	M1414	LUAD	6	10	M791	ARCN1	NA	1.34786	0.0615049
c142	M813	BRCA	4	11	M239	ATXN1L	NA	1.07799	0.664956
c142	M649	ESCA	4	13	M131	ATXN1L	NA	1.36556	0.275805
c142	M1537	LUSC	6	15	M772	ATXN1L	NA	1.37756	0.0398167
c143	M1074	CESC	4	14	M326	RPSA,RPSAP58	NA	0.97592	0.925019
c143	M842	LUAD	6	13	M319	RPL14	COTRANSLATIONAL_PROTEIN_TARGETING_TO_MEMBRANE	0.922983	0.613044
c143	M936	MESO	4	11	M272	RPL14	NA	0.637125	0.0804955
c144	M161	CESC	2	20	M3	C2orf24	RESPONSE_TO_TOPOLOGICALLY_INCORRECT_PROTEIN	0.827915	0.467362
c144	M291	ESCA	3	21	M38	MRPL44	FORMATION_OF_EXTRACHROMOSOMAL_CIRCULAR_DNA	0.796418	0.426742
c144	M201	SARC	3	21	M7		NA	0.734537	0.140532
c145	M166	CESC	2	18	M3	TXNL1,HAUS1	NA	0.782664	0.353239
c145	M262	PRAD	3	24	M63	ZADH2	NA	0.760212	0.609052
c145	M572	STAD	5	21	M161	TXNL1	NA	0.932652	0.688998
c146	M728	CESC	3	16	M132	ISY1	DNA_REPLICATION_INITIATION	0.634994	0.082324
c146	M1755	LUSC	7	10	M1147	ISY1,MRPL3	NA	0.887607	0.440515
c146	M1572	OV	7	14	M891	UMPS	NA	0.892366	0.451239
c147	M734	CESC	3	13	M134	FAM3A,EMD	NA	0.655888	0.106695
c147	M210	COAD	5	13	M44	FAM58A,NAA10	NA	1.42123	0.148472
c147	M1312	READ	5	12	M617	FAM58A,NAA10	NA	0.959096	0.926074
c148	M1074	CHOL	4	14	M367		GOLGI_ORGANIZATION	0.931167	0.879952
c148	M1140	LIHC	5	19	M480	VCPIP1	NA	1.24972	0.217768
c148	M1535	LIHC	6	10	M1140	LYPLA1	NA	0.995899	0.981892
c149	M1201	CHOL	4	17	M443	ZNF304,ZNF543	NA	0.804429	0.647542
c149	M723	GBM	4	17	M194	ZNF304	NA	1.05379	0.788156
c149	M1253	LUAD	6	10	M691	ZNF134	NA	0.973745	0.868026
c15	M312	BLCA	5	11	M67	POTEE,LOC100130331	NA	0.903279	0.507959
c15	M563	CESC	3	12	M70	P704P	NA	0.928164	0.773927
c15	M564	CESC	3	31	M70	RPL19P12,RPL31P11	NA	0.787684	0.360328
c15	M70	CESC	2	43	M3	RPL19P12,RPL31P11	NA	0.849492	0.530893
c15	M319	KICH	4	68	M50	POTEE,RPL19P12,LOC100130331,POTEF	MODULATION_OF_MOLECULAR_FUNCTION_IN_OTHER_ORGANISM	1.37208	0.637393
c15	M50	KICH	3	84	M6	POTEE,RPL19P12,LOC100130331,POTEF	MODULATION_OF_MOLECULAR_FUNCTION_IN_OTHER_ORGANISM	1.26247	0.728422
c15	M948	KICH	5	43	M319	POTEE,POTEF,LOC100130331	NA	1.39311	0.621343
c15	M396	LGG	4	21	M70	POTEF,POTEE	NA	1.0212	0.885987
c15	M70	LGG	3	48	M6	POTEF,RPL19P12,POTEE,NACA2	NA	0.960756	0.784067
c15	M285	LUAD	5	18	M70	POTEE,LOC100130331	NA	1.05841	0.720224
c15	M286	LUAD	5	31	M70	RPL19P12,FLJ44635	NA	1.17133	0.319076
c15	M70	LUAD	4	58	M8	RPL19P12,POTEE,HSP90B3P	NA	1.08555	0.605068
c15	M8	LUAD	3	77	M2	RPL19P12,POTEE,HSP90B3P	MODULATION_OF_MOLECULAR_FUNCTION_IN_OTHER_ORGANISM	1.08443	0.609603
c15	M54	PAAD	4	16	M5	POTEF	NA	1.42025	0.099545
c15	M374	PCPG	4	25	M80	POTEF,POTEE	NA	1.55855	0.332587
c15	M80	PCPG	3	35	M8	POTEF,POTEE	NA	1.45385	0.420741
c15	M276	PRAD	3	50	M65	RPL19P12	NA	0.939344	0.904407
c15	M664	PRAD	4	30	M276	RPL19P12,NACA2	NA	1.20977	0.714729
c15	M193	READ	3	11	M14	LOC100130331	NA	0.737714	0.513759
c15	M18	SKCM	2	40	M3		MODULATION_OF_MOLECULAR_FUNCTION_IN_OTHER_ORGANISM	1.51886	0.272319
c15	M227	SKCM	3	17	M18		NA	1.37276	0.400372
c15	M229	SKCM	3	16	M18	RPL19P12	NA	0.875053	0.721236
c15	M1015	THCA	5	12	M529	POTEE,POTEF	NA	1.07703	0.80151
c15	M117	THCA	3	39	M9	RPL19P12,FLJ44635,POTEE,POTEF	NA	0.743574	0.31929
c15	M528	THCA	4	21	M117	RPL19P12,FLJ44635	NA	0.665162	0.173404
c15	M529	THCA	4	18	M117	POTEE,POTEF	NA	0.833168	0.53758
c150	M799	DLBC	4	10	M199	IFI6	NA	0.786271	0.714337
c150	M890	ESCA	4	10	M233	ISG15	NA	1.51404	0.144257
c150	M1672	MESO	6	11	M1425	ISG15,IRF7	NA	0.733843	0.216909
c151	M379	ESCA	3	86	M56	DVL3,FYTTD1	NA	1.34911	0.2934
c151	M56	ESCA	2	100	M1	DVL3,FYTTD1	NA	1.32879	0.318678
c151	M330	OV	4	132	M143	SENP5,PSMD2,RFC4,SENP2	NA	1.22365	0.180961
c152	M410	ESCA	3	11	M62		NA	0.789898	0.405622
c152	M451	KIRP	4	18	M71	FLJ37453,C5orf55,LOC147727	NA	0.424214	0.00990494
c152	M128	STAD	4	19	M11	LOC147727,FLJ37453	NA	1.16588	0.377145
c153	M589	ESCA	4	10	M106	TXNL4A	NA	0.871124	0.626495
c153	M1248	OV	6	13	M657		NA	0.901138	0.489131
c153	M1055	STAD	6	10	M572	TXNL4A,CNDP2	NA	0.777222	0.149083
c154	M67	ESCA	2	68	M1		TRNA_METABOLIC_PROCESS	0.611771	0.088886
c154	M129	LUSC	4	84	M22	CDC123,FBXO18	ISOPRENOID_BIOSYNTHETIC_PROCESS	1.05672	0.721106
c154	M555	OV	5	49	M329	GTPBP4,UPF2	NA	1.17532	0.283315
c155	M77	ESCA	2	137	M1	XRCC6,TOMM22,DGCR14,DRG1,SNRPD3,RANBP1	PROTEIN_TARGETING_TO_MITOCHONDRION	0.745336	0.302196
c155	M371	SARC	3	105	M31	POLR2F,PES1,RPS19BP1	NA	1.03664	0.862552
c155	M109	THCA	3	140	M9	ZMAT5,RPS19BP1,TXN2,EIF3D,C22orf40,NOL12,PES1	NA	0.725694	0.284473
c156	M463	HNSC	5	15	M94	RPL30	NA	1.10477	0.472714
c156	M137	LUAD	4	14	M17		NA	1.18197	0.296828
c156	M1053	READ	5	21	M340	RPL8	TRANSLATIONAL_INITIATION	1.19825	0.688058
c157	M670	HNSC	5	36	M151	BRMS1,YIF1A	NA	1.37017	0.024316
c157	M1647	LUAD	7	27	M1275	NDUFS8	NA	0.924195	0.61875
c157	M469	LUSC	5	37	M115	PPP1CA,NDUFS8	NA	1.12792	0.439215
c158	M934	KIRP	4	12	M313	NEDD8	NA	0.805785	0.481775
c158	M1390	LUSC	6	10	M682	NEDD8	NA	0.925742	0.621175
c158	M1472	SARC	5	15	M1035	NEDD8	PROTEASOMAL_UBIQUITIN_INDEPENDENT_PROTEIN_CATABOLIC_PROCESS	1.01927	0.926729
c159	M145	LIHC	4	53	M11	FCRL5,CD79A,CXCR5,MS4A1	B_CELL_ACTIVATION	0.657178	0.0214369
c159	M246	PCPG	5	37	M20	POU2AF1	B_CELL_ACTIVATION	1.02176	0.961762
c159	M83	UCEC	5	43	M9	FCRL5,CD79A,MS4A1	B_CELL_ACTIVATION	0.721917	0.140134
c16	M198	BLCA	3	35	M21	PSMF1,ITPA	NA	1.0146	0.924559
c16	M790	BLCA	4	23	M198	PSMF1,ITPA	NA	0.862362	0.335147
c16	M530	BRCA	4	32	M129	MRPS26	NA	1.01841	0.915769
c16	M116	CESC	2	45	M3	SNRPB	NA	0.93875	0.808219
c16	M685	CESC	3	31	M116	SNRPB	NA	0.798285	0.386499
c16	M1323	ESCA	4	18	M491	MRPS26	NA	0.809533	0.456696
c16	M1325	ESCA	4	15	M491	PSMF1	PROTEASOMAL_PROTEIN_CATABOLIC_PROCESS	1.41129	0.223495
c16	M491	ESCA	3	41	M80	PSMF1	POSITIVE_REGULATION_OF_I_KAPPAB_KINASE_NF_KAPPAB_SIGNALING	1.16605	0.585489
c16	M80	ESCA	2	86	M1	SNRPB	NA	0.995384	0.986917
c16	M169	HNSC	4	32	M15	LOC388789,SNRPB2	NA	1.08298	0.566007
c16	M105	LUAD	4	36	M13		NA	1.18977	0.277034
c16	M1251	LUSC	6	16	M518	MRPS26,SNRPB	NA	1.11795	0.470513
c16	M128	LUSC	4	68	M22		NA	1.0706	0.658945
c16	M517	LUSC	5	25	M128		CELLULAR_RESPONSE_TO_EXOGENOUS_DSRNA	1.28856	0.102085
c16	M518	LUSC	5	26	M128	SNRPB	NA	1.07609	0.634964
c16	M331	OV	4	64	M143	CSNK2A1,NSFL1C,PSMF1	NA	1.02232	0.883491
c16	M561	OV	5	45	M331	CSNK2A1,NSFL1C	NA	1.02226	0.883664
c16	M562	OV	5	13	M331	MRPS26	NA	0.861952	0.324335
c16	M1124	READ	5	40	M399	CSNK2A1,PTPRA	NA	1.17852	0.725323
c16	M1125	READ	5	25	M399	IDH3B	NA	0.926883	0.865887
c16	M1664	READ	6	32	M1124	CSNK2A1	NA	1.09778	0.842724
c16	M399	READ	4	87	M47	CSNK2A1,TASP1	NA	0.725987	0.488264
c16	M47	READ	3	97	M9	CSNK2A1,TASP1	NA	1.10087	0.831294
c16	M185	SARC	3	28	M7	MRPS26,SNRPB2	NA	1.10347	0.635384
c160	M1122	LUAD	6	31	M631	GZMA,NKG7,CCL5	NATURAL_KILLER_CELL_MEDIATED_IMMUNITY	0.835379	0.258091
c160	M953	LUSC	6	39	M311	NKG7	CELLULAR_DEFENSE_RESPONSE	0.921224	0.595399
c160	M1119	STAD	7	31	M617	CCL5,NKG7	CYTIDINE_TO_URIDINE_EDITING	1.19285	0.312541
c161	M114	LUAD	4	51	M14	TXN2,RBX1	SULFUR_COMPOUND_CATABOLIC_PROCESS	1.48254	0.0151419
c161	M417	LUSC	5	66	M99	TOMM22,PHF5A,TXN2	ORGANIC_ACID_CATABOLIC_PROCESS	1.04266	0.787162
c161	M99	LUSC	4	78	M21	TOMM22,PHF5A,TXN2	MITOCHONDRIAL_TRANSPORT	1.01284	0.934219
c162	M390	LUAD	5	17	M100	RNASEN	NA	0.897548	0.497937
c162	M1136	LUSC	6	12	M446	NIPBL,RNASEN	NA	1.1939	0.253153
c162	M1516	OV	7	10	M854		NA	1.0727	0.642095
c163	M73	LUAD	4	40	M9	COX4NB	CELLULAR_RESPONSE_TO_NITROGEN_STARVATION	1.11674	0.488582
c163	M101	LUSC	4	81	M21	COX4NB,PSMD7,HSBP1,POLR2C	CELLULAR_RESPONSE_TO_NITROGEN_STARVATION	1.01295	0.933565
c163	M421	LUSC	5	34	M101	COX4NB,HSBP1,PSMD7	CELLULAR_RESPONSE_TO_NITROGEN_STARVATION	0.946205	0.71996
c164	M142	LUSC	4	42	M23	PAK2,OPA1,SENP5	NA	0.895931	0.478104
c164	M575	LUSC	5	28	M142	PAK2,OPA1,UBXN7	NEGATIVE_REGULATION_OF_PROTEIN_DEPHOSPHORYLATION	0.819755	0.199617
c164	M558	OV	5	41	M330	SENP5	NA	1.20521	0.217095
c165	M1471	LUSC	6	17	M732	G3BP2	NA	1.00897	0.954106
c165	M1054	OV	6	18	M572	NUP54	NA	1.01482	0.922557
c165	M572	OV	5	26	M335		NA	0.978888	0.887314
c166	M185	LUSC	4	22	M24	UBE2D3,EIF4E,MAPKSP1	NA	0.86391	0.345193
c166	M1088	OV	6	38	M590	UBE2D3,MAPKSP1	NA	0.881222	0.401392
c166	M1778	OV	7	28	M1088	UBE2D3,MAPKSP1	NA	0.919528	0.577587
c167	M222	LUSC	4	73	M25	AP1G1,ATXN1L,DHX38	PROTECTION_FROM_NON_HOMOLOGOUS_END_JOINING_AT_TELOMERE	1.27535	0.115434
c167	M772	LUSC	5	63	M222	AP1G1,ATXN1L,DHX38	PROTECTION_FROM_NON_HOMOLOGOUS_END_JOINING_AT_TELOMERE	1.30544	0.0846249
c167	M678	OV	5	95	M348	DHX38,DYNC1LI2,ATXN1L,NFATC3,RANBP10	REGULATION_OF_FATTY_ACID_METABOLIC_PROCESS	1.27453	0.109169
c168	M495	LUSC	5	32	M125	VPS72,MRPL9,PRUNE	NA	0.943219	0.706804
c168	M1543	OV	7	30	M870	VPS72	NA	0.871528	0.363033
c168	M870	OV	6	37	M517	VPS72	NA	0.873042	0.369069
c169	M525	LUSC	5	26	M130	COMMD2	NA	0.743729	0.056581
c169	M1024	OV	6	15	M560	RSRC1,KPNA4	NA	0.92578	0.611779
c169	M560	OV	5	30	M330	RSRC1	NA	0.933702	0.653311
c17	M1675	ACC	6	11	M910		NA	0.453314	0.0554232
c17	M282	BLCA	5	16	M40	CPA3,TPSAB1	REGULATION_OF_ANGIOTENSIN_LEVELS_IN_BLOOD	1.36659	0.043246
c17	M1016	CESC	5	20	M311	CPA3,MS4A2	REGULATION_OF_ANGIOTENSIN_LEVELS_IN_BLOOD	0.86641	0.580155
c17	M147	COAD	4	16	M18	MS4A2	NA	0.944276	0.811945
c17	M451	DLBC	3	12	M57	CTSG	NA	0.945781	0.930794
c17	M229	ESCA	3	18	M28	HDC	POSITIVE_REGULATION_OF_MAST_CELL_ACTIVATION_INVOLVED_IN_IMMUNE_RESPONSE	1.02	0.943836
c17	M875	ESCA	4	10	M229	HDC	NA	1.15168	0.61534
c17	M750	HNSC	5	16	M188	CPA3,MS4A2	REGULATION_OF_ANGIOTENSIN_LEVELS_IN_BLOOD	0.678152	0.00565081
c17	M178	KICH	4	19	M21	HDC,SIGLEC6	REGULATION_OF_ANGIOTENSIN_LEVELS_IN_BLOOD	0.866363	0.830774
c17	M753	KICH	5	12	M178	MS4A2,TPSAB1,HDC	NA	1.45105	0.579375
c17	M766	KIRC	6	15	M217	CPA3,MS4A2	REGULATION_OF_ANGIOTENSIN_LEVELS_IN_BLOOD	0.715392	0.0289376
c17	M624	LIHC	5	14	M142	CPA3	REGULATION_OF_ANGIOTENSIN_LEVELS_IN_BLOOD	0.75477	0.122797
c17	M1126	LUAD	6	30	M635	MS4A2,CPA3	RESPONSE_TO_ELECTRICAL_STIMULUS	0.651808	0.00810072
c17	M265	LUSC	5	17	M30	MS4A2	REGULATION_OF_ANGIOTENSIN_LEVELS_IN_BLOOD	1.06321	0.691637
c17	M351	PAAD	4	17	M87	MS4A2,SIGLECP3	EMBRYONIC_HEMOPOIESIS	0.959454	0.845646
c17	M907	PCPG	6	18	M285	TPSAB1	CORNIFICATION	1.39985	0.454968
c17	M26	PRAD	3	20	M2	MS4A2	REGULATION_OF_ANGIOTENSIN_LEVELS_IN_BLOOD	0.82811	0.71662
c17	M283	READ	5	22	M20	CPA3	REGULATION_OF_ANGIOTENSIN_LEVELS_IN_BLOOD	1.85028	0.197732
c17	M505	SARC	4	31	M105	HDC,MS4A2	REGULATION_OF_ANGIOTENSIN_LEVELS_IN_BLOOD	0.499166	0.00116897
c17	M225	SKCM	3	12	M17		REGULATION_OF_ANGIOTENSIN_LEVELS_IN_BLOOD	1.05723	0.884782
c17	M187	STAD	5	18	M16	MS4A2	POSITIVE_REGULATION_OF_INTERLEUKIN_5_PRODUCTION	1.65507	0.00458131
c17	M670	THCA	6	13	M194	TPSAB1,CPA3	REGULATION_OF_ANGIOTENSIN_LEVELS_IN_BLOOD	0.845112	0.569826
c17	M48	THYM	3	10	M5	TPSAB1,MS4A2	NA	1.50446	0.360996
c170	M683	LUSC	5	13	M192	PRMT5,TOX4	DNA_MODIFICATION	0.771474	0.0970831
c170	M125	OV	4	14	M21		RNA_DESTABILIZATION	0.896778	0.469517
c170	M247	SARC	3	14	M9	NGDN,PRMT5	DNA_MODIFICATION	1.16902	0.452907
c171	M1241	OV	6	13	M656		NA	0.77441	0.0913796
c171	M187	SARC	3	14	M7	AMMECR1L	NA	0.916907	0.676138
c171	M675	SARC	4	10	M187	ERCC3	NA	0.91477	0.667909
c172	M664	OV	5	61	M346	TBC1D10B,RNF40,ZNF646,ZNF747	PRIMARY_ALCOHOL_CATABOLIC_PROCESS	0.751755	0.0591595
c172	M391	UCS	3	47	M59	ZNF768,ZNF629	NA	1.57577	0.19923
c172	M59	UCS	2	58	M2	ZNF768,ZNF629	NA	1.66526	0.15068
c173	M178	SARC	3	16	M7	ZNF737	NA	1.27527	0.2516
c173	M1163	SKCM	4	11	M441	ZNF626	NA	1.39423	0.374541
c173	M441	SKCM	3	15	M67		NA	1.693	0.161327
c174	M1083	BLCA	5	13	M431	ZNF69,ZNF763	NA	0.923212	0.601706
c174	M472	SKCM	3	14	M76	ZNF44	NA	1.48088	0.295434
c175	M1182	BLCA	5	15	M491	AQR	NA	1.59073	0.00275788
c175	M657	BRCA	4	12	M171	ZNF770,AQR	NA	1.243	0.209978
c176	M1223	BLCA	5	11	M526	PIGU	NA	0.908831	0.532375
c176	M1257	CESC	4	13	M526	RALY	SULFUR_AMINO_ACID_METABOLIC_PROCESS	0.882157	0.628224
c177	M1252	BLCA	5	10	M555	ZNF417	NA	0.918525	0.578882
c177	M1019	UCS	4	10	M384	ZNF776	NA	1.2906	0.454032
c178	M1260	BLCA	5	14	M558	XRCC6,ST13	PROTEIN_TETRAMERIZATION	1.14634	0.373941
c178	M1076	BRCA	5	12	M503	XRCC6	NA	0.972177	0.870144
c179	M1325	BLCA	5	14	M634	GSK3A	NA	0.752751	0.0641773
c179	M1478	LUSC	6	19	M734	ZNF574	NA	0.884047	0.426347
c18	M905	ACC	5	18	M193	HLA.DPB1,HLA.DRA	NA	0.456227	0.0531305
c18	M247	BLCA	5	15	M26	HLA.DRA,HLA.DPA1	NA	0.690327	0.0160092
c18	M301	BRCA	5	12	M30	HLA.DPA1	NA	0.644306	0.0125715
c18	M1488	CESC	6	17	M1013	HLA.DRA,HLA.DPA1	NA	0.663307	0.117223
c18	M315	COAD	5	19	M70	HLA.DRA	NA	0.818898	0.418865
c18	M598	DLBC	3	12	M96	HLA.DRA	NA	0.689902	0.573335
c18	M3	ESCA	2	13	M1	HLA.DRA	NA	0.793298	0.418416
c18	M1360	HNSC	6	21	M746	HLA.DMB,HLA.DPB1,HLA.DRA	NA	0.726604	0.0220102
c18	M668	KIRC	6	16	M156	HLA.DPB1	NA	0.916667	0.567351
c18	M1144	KIRP	6	22	M492	HLA.DPB1,HLA.DRA	NA	0.786098	0.433624
c18	M627	LIHC	5	15	M143	HLA.DPB1	NA	0.781327	0.170835
c18	M861	LUSC	6	27	M260	CD74	ADAPTIVE_IMMUNE_RESPONSE_BASED_ON_SOMATIC_RECOMBINATION_OF_IMMUNE_RECEPTORS_BUILT_FROM_IMMUNOGLOBULIN_SUPERFAMILY_DOMAINS	1.05559	0.725399
c18	M757	MESO	4	34	M177	HLA.DPB1,HLA.DRA	NA	0.619151	0.0592838
c18	M153	OV	5	20	M32	HLA.DRA,HLA.DMA	NA	0.883572	0.412982
c18	M663	PAAD	5	25	M254	HLA.DRA,HLA.DMB	IMMUNE_RESPONSE_REGULATING_CELL_SURFACE_RECEPTOR_SIGNALING_PATHWAY	0.915077	0.676948
c18	M1399	SKCM	6	11	M767	HLA.DPA1,HLA.DRA	NA	0.704423	0.349243
c18	M767	SKCM	5	18	M187	HLA.DRA	NA	0.665708	0.279416
c18	M1114	STAD	7	24	M616	HLA.DRA	POSITIVE_REGULATION_OF_CYTOKINE_PRODUCTION_INVOLVED_IN_IMMUNE_RESPONSE	1.00871	0.960135
c18	M1121	THYM	5	11	M621	HLA.DPB1	NA	2.42511	0.0566098
c18	M943	UCEC	7	12	M408	HLA.DPB1,HLA.DPA1	NA	0.683858	0.0890941
c180	M1426	BLCA	5	10	M737	CHMP7,KIAA1967	NA	1.28485	0.104165
c180	M834	SARC	4	13	M281	ELP3	NA	1.03466	0.869696
c181	M147	BLCA	3	10	M21	ZNF419	NA	0.820679	0.197901
c181	M234	SKCM	3	16	M20	ZNF419	NA	1.41954	0.370589
c182	M1541	BLCA	5	17	M879	SMU1,STOML2	POSITIVE_REGULATION_OF_MITOCHONDRIAL_MEMBRANE_POTENTIAL	0.997501	0.98697
c182	M152	CESC	2	20	M3	APTX	POSITIVE_REGULATION_OF_MITOCHONDRIAL_MEMBRANE_POTENTIAL	1.16782	0.549408
c183	M1543	BLCA	5	10	M880		NA	0.944336	0.708277
c183	M512	LUSC	5	12	M127		NA	1.13246	0.420187
c184	M1640	BLCA	6	26	M1148	PSMB6,RNMTL1	NA	0.95528	0.765623
c184	M1064	BRCA	5	26	M500	PSMB6	NA	1.00327	0.984898
c185	M234	BLCA	3	23	M23		NA	1.30102	0.0874183
c185	M235	BRCA	3	49	M22	ZW10	NA	1.06971	0.696562
c186	M236	BLCA	3	15	M23		NA	0.80272	0.153833
c186	M208	SARC	3	12	M7	BAT2L2,VAMP4	NA	1.17508	0.437777
c187	M408	BLCA	4	17	M117	HOXB3,HOXB6,HOXB5	EMBRYONIC_SKELETAL_SYSTEM_DEVELOPMENT	0.772473	0.0951023
c187	M195	OV	5	10	M43		NA	1.24376	0.152826
c188	M475	BLCA	4	16	M118	RPL19P12,FLJ44635	NA	0.851199	0.296669
c188	M375	PCPG	4	10	M80	FLJ44635,RPL19P12	NA	1.52174	0.351372
c189	M499	BLCA	4	34	M122	OTUD5,UXT	NA	0.839699	0.255095
c189	M52	CESC	2	49	M3	UXT,OTUD5	NA	0.706709	0.183342
c19	M1092	BLCA	5	18	M434	ZNF461	NA	0.700715	0.0207702
c19	M434	BLCA	4	48	M117	ZNF461,ZNF420	POSITIVE_REGULATION_OF_DENDRITE_MORPHOGENESIS	0.702316	0.0215795
c19	M1283	BRCA	5	19	M704	ZNF461,ZNF566	NA	1.04973	0.778266
c19	M187	BRCA	3	55	M22		NA	1.26567	0.174843
c19	M704	BRCA	4	35	M187	ZNF461	NA	1.08082	0.651971
c19	M536	CESC	3	21	M59	ZNF461	NA	0.89749	0.676955
c19	M209	ESCA	3	20	M25	ZNF461	NA	0.850905	0.565501
c19	M580	LGG	5	21	M168		NA	1.51392	0.00503899
c19	M94	LIHC	3	59	M10	ZNF45,ZNF223,ZNF461,ZNF260	NA	0.854341	0.385646
c19	M178	LUAD	4	36	M27	ZNF529,ZNF566	NA	0.845328	0.290534
c19	M27	LUAD	3	67	M2	ZNF566	NA	0.996773	0.983798
c19	M536	LUAD	5	17	M178	ZNF420	NA	0.875831	0.404585
c19	M198	LUSC	4	66	M25	LSM14A	NA	1.10137	0.532596
c19	M703	LUSC	5	24	M198		NA	1.14299	0.388247
c19	M764	OV	6	27	M483	ZNF568	NA	0.934661	0.653914
c19	M132	SARC	3	32	M7	ZNF567,ZNF527,ZNF566	NA	1.15414	0.491666
c19	M731	STAD	6	13	M208		NA	1.56174	0.0112646
c19	M258	UCS	3	51	M22	ZNF382	NA	0.760089	0.436644
c19	M823	UCS	4	36	M258	ZNF382,ZNF527,ZNF461	NA	0.77609	0.472654
c190	M533	BLCA	4	49	M127	C14orf156,FKBP3	CELLULAR_KETONE_METABOLIC_PROCESS	1.0364	0.815304
c190	M982	HNSC	6	37	M391	C14orf156	CELLULAR_KETONE_METABOLIC_PROCESS	1.31185	0.0513797
c191	M559	BLCA	4	18	M133		NA	0.915325	0.563799
c191	M1078	BRCA	5	11	M503	DRG1	NA	1.1217	0.505896
c192	M569	BLCA	4	15	M135	HSP90AB4P,MRS2P2	NA	0.994524	0.971455
c192	M158	LUAD	4	12	M21	HSP90AB4P	NA	0.969453	0.845196
c193	M650	BLCA	4	13	M152	SSB,METTL5	NA	0.93055	0.639329
c193	M1510	HNSC	7	12	M985	METTL5	NA	1.3596	0.0284971
c194	M659	BLCA	4	45	M154	ZNHIT1,POLR2J	NA	0.978238	0.885644
c194	M553	CESC	3	60	M65	ZNHIT1,POLR2J	NA	0.952854	0.852172
c195	M674	BLCA	4	17	M159	PAF1,PSMC4	RNA_3_END_PROCESSING	0.996519	0.981841
c195	M533	PAAD	4	15	M112		REGULATION_OF_TRANSCRIPTION_FROM_RNA_POLYMERASE_II_PROMOTER_IN_RESPONSE_TO_HYPOXIA	0.784128	0.251624
c196	M689	BLCA	4	16	M165	VPS26A	INTRASPECIES_INTERACTION_BETWEEN_ORGANISMS	1.27011	0.120997
c196	M884	SARC	4	14	M299		NA	1.04111	0.846252
c197	M717	BLCA	4	17	M175	UBE2W,YTHDF3	NA	0.973204	0.859179
c197	M670	SARC	4	13	M186	YTHDF3	NA	1.14858	0.505762
c198	M742	BLCA	4	15	M181	PPP2CA	REGULATION_OF_HISTONE_PHOSPHORYLATION	1.16258	0.326027
c198	M704	READ	4	13	M168	PPP2CA,ZCCHC10	NEGATIVE_REGULATION_OF_HISTONE_MODIFICATION	0.797802	0.617229
c199	M746	BLCA	4	11	M183		NA	1.004	0.979205
c199	M183	SARC	3	21	M7	QRICH1,USP19	PROTEIN_MODIFICATION_BY_SMALL_PROTEIN_REMOVAL	0.966281	0.86869
c2	M1441	ACC	5	10	M722	PCDHB12,PCDHB14	NA	0.990713	0.981246
c2	M1443	ACC	5	10	M723	PCDHA2,PCDHA5	NA	1.98219	0.0988479
c2	M151	ACC	3	46	M6	PCDHGA1	HOMOPHILIC_CELL_ADHESION_VIA_PLASMA_MEMBRANE_ADHESION_MOLECULES	1.19195	0.65623
c2	M722	ACC	4	17	M151	PCDHB12	HOMOPHILIC_CELL_ADHESION_VIA_PLASMA_MEMBRANE_ADHESION_MOLECULES	0.936344	0.867845
c2	M723	ACC	4	29	M151	PCDHGA1	HOMOPHILIC_CELL_ADHESION_VIA_PLASMA_MEMBRANE_ADHESION_MOLECULES	1.05003	0.901723
c2	M162	BLCA	3	36	M21		HOMOPHILIC_CELL_ADHESION_VIA_PLASMA_MEMBRANE_ADHESION_MOLECULES	1.21949	0.197134
c2	M682	BLCA	4	16	M162		HOMOPHILIC_CELL_ADHESION_VIA_PLASMA_MEMBRANE_ADHESION_MOLECULES	1.11183	0.489742
c2	M683	BLCA	4	20	M162	PCDHB12	HOMOPHILIC_CELL_ADHESION_VIA_PLASMA_MEMBRANE_ADHESION_MOLECULES	1.40248	0.0285287
c2	M206	BRCA	3	11	M22	PCDHA2	HOMOPHILIC_CELL_ADHESION_VIA_PLASMA_MEMBRANE_ADHESION_MOLECULES	1.43084	0.0402153
c2	M342	BRCA	5	12	M51	PCDHB12	NA	1.11859	0.518605
c2	M51	BRCA	4	21	M6	PCDHB12,PCDHB14	HOMOPHILIC_CELL_ADHESION_VIA_PLASMA_MEMBRANE_ADHESION_MOLECULES	1.48793	0.02383
c2	M58	BRCA	4	14	M6	PCDHGB3	HOMOPHILIC_CELL_ADHESION_VIA_PLASMA_MEMBRANE_ADHESION_MOLECULES	1.27082	0.168095
c2	M1035	CESC	5	11	M315	PCDHB17	NA	1.86118	0.0196138
c2	M636	CESC	3	12	M94	PCDHGA6	HOMOPHILIC_CELL_ADHESION_VIA_PLASMA_MEMBRANE_ADHESION_MOLECULES	1.86518	0.0216399
c2	M94	CESC	2	26	M3	PCDHGA6,PCDHGA12	HOMOPHILIC_CELL_ADHESION_VIA_PLASMA_MEMBRANE_ADHESION_MOLECULES	1.75049	0.0369335
c2	M1241	CHOL	4	18	M462	PCDHA9,PCDHA8	HOMOPHILIC_CELL_ADHESION_VIA_PLASMA_MEMBRANE_ADHESION_MOLECULES	1.33401	0.554523
c2	M363	CHOL	3	21	M54	PCDHGA5,PCDHGA6	HOMOPHILIC_CELL_ADHESION_VIA_PLASMA_MEMBRANE_ADHESION_MOLECULES	1.18186	0.723608
c2	M364	CHOL	3	24	M54	PCDHB16	HOMOPHILIC_CELL_ADHESION_VIA_PLASMA_MEMBRANE_ADHESION_MOLECULES	0.614573	0.328723
c2	M54	CHOL	2	45	M3	PCDHB16,PCDHGA5,PCDHGA6	HOMOPHILIC_CELL_ADHESION_VIA_PLASMA_MEMBRANE_ADHESION_MOLECULES	0.963349	0.93902
c2	M123	COAD	4	19	M16	PCDHB12,PCDHB7	HOMOPHILIC_CELL_ADHESION_VIA_PLASMA_MEMBRANE_ADHESION_MOLECULES	1.67134	0.0346104
c2	M132	COAD	4	11	M16		HOMOPHILIC_CELL_ADHESION_VIA_PLASMA_MEMBRANE_ADHESION_MOLECULES	1.3442	0.219298
c2	M382	COAD	5	10	M123	PCDHB7	NA	1.54264	0.0734834
c2	M1289	DLBC	4	18	M583	PCDHGA6	HOMOPHILIC_CELL_ADHESION_VIA_PLASMA_MEMBRANE_ADHESION_MOLECULES	0.83429	0.78216
c2	M583	DLBC	3	24	M91		HOMOPHILIC_CELL_ADHESION_VIA_PLASMA_MEMBRANE_ADHESION_MOLECULES	0.770983	0.683795
c2	M149	ESCA	3	27	M13	PCDHB12	HOMOPHILIC_CELL_ADHESION_VIA_PLASMA_MEMBRANE_ADHESION_MOLECULES	0.851093	0.565783
c2	M347	ESCA	3	13	M48	PCDHA2	HOMOPHILIC_CELL_ADHESION_VIA_PLASMA_MEMBRANE_ADHESION_MOLECULES	1.17905	0.559299
c2	M720	ESCA	4	14	M149	PCDHGA5,PCDHGA6	HOMOPHILIC_CELL_ADHESION_VIA_PLASMA_MEMBRANE_ADHESION_MOLECULES	1.10074	0.733313
c2	M721	ESCA	4	13	M149	PCDHB12	HOMOPHILIC_CELL_ADHESION_VIA_PLASMA_MEMBRANE_ADHESION_MOLECULES	0.841319	0.539517
c2	M456	GBM	5	10	M92	PCDHB10	NA	0.994558	0.977441
c2	M308	HNSC	5	12	M47		HOMOPHILIC_CELL_ADHESION_VIA_PLASMA_MEMBRANE_ADHESION_MOLECULES	1.2101	0.171819
c2	M107	KICH	3	20	M11	PCDHGA4	HOMOPHILIC_CELL_ADHESION_VIA_PLASMA_MEMBRANE_ADHESION_MOLECULES	0.727938	0.636597
c2	M261	KICH	4	19	M34	PCDHB8	HOMOPHILIC_CELL_ADHESION_VIA_PLASMA_MEMBRANE_ADHESION_MOLECULES	1.14399	0.841199
c2	M788	KIRC	6	11	M221	PCDHA5	HOMOPHILIC_CELL_ADHESION_VIA_PLASMA_MEMBRANE_ADHESION_MOLECULES	0.961261	0.795113
c2	M160	KIRP	3	13	M16	PCDHA12	HOMOPHILIC_CELL_ADHESION_VIA_PLASMA_MEMBRANE_ADHESION_MOLECULES	1.10465	0.745111
c2	M182	KIRP	3	17	M19	PCDHB8,PCDHB9	HOMOPHILIC_CELL_ADHESION_VIA_PLASMA_MEMBRANE_ADHESION_MOLECULES	0.775997	0.410125
c2	M702	KIRP	4	12	M182	PCDHB8	HOMOPHILIC_CELL_ADHESION_VIA_PLASMA_MEMBRANE_ADHESION_MOLECULES	0.845107	0.584032
c2	M16	LIHC	3	22	M4	PCDHB10	HOMOPHILIC_CELL_ADHESION_VIA_PLASMA_MEMBRANE_ADHESION_MOLECULES	0.783136	0.176302
c2	M17	LIHC	3	15	M4	PCDHA11	HOMOPHILIC_CELL_ADHESION_VIA_PLASMA_MEMBRANE_ADHESION_MOLECULES	1.42755	0.0509119
c2	M174	LIHC	4	12	M16	PCDHB12	NA	0.834086	0.315595
c2	M176	LIHC	4	14	M18	PCDHGA6	HOMOPHILIC_CELL_ADHESION_VIA_PLASMA_MEMBRANE_ADHESION_MOLECULES	0.71601	0.0655539
c2	M18	LIHC	3	18	M4	PCDHGA6	HOMOPHILIC_CELL_ADHESION_VIA_PLASMA_MEMBRANE_ADHESION_MOLECULES	0.73352	0.0869972
c2	M4	LIHC	2	55	M1		HOMOPHILIC_CELL_ADHESION_VIA_PLASMA_MEMBRANE_ADHESION_MOLECULES	0.860097	0.403283
c2	M601	LUAD	5	11	M210	PCDHB12	NA	0.99835	0.991676
c2	M608	LUAD	5	15	M210		HOMOPHILIC_CELL_ADHESION_VIA_PLASMA_MEMBRANE_ADHESION_MOLECULES	1.08533	0.605457
c2	M610	LUAD	5	16	M210	PCDHGA6	HOMOPHILIC_CELL_ADHESION_VIA_PLASMA_MEMBRANE_ADHESION_MOLECULES	1.11626	0.488222
c2	M241	LUSC	5	14	M28		HOMOPHILIC_CELL_ADHESION_VIA_PLASMA_MEMBRANE_ADHESION_MOLECULES	1.31975	0.0731253
c2	M297	LUSC	5	16	M31	PCDHB8,PCDHB17	HOMOPHILIC_CELL_ADHESION_VIA_PLASMA_MEMBRANE_ADHESION_MOLECULES	1.21284	0.212976
c2	M109	MESO	2	20	M2	PCDHGA6	HOMOPHILIC_CELL_ADHESION_VIA_PLASMA_MEMBRANE_ADHESION_MOLECULES	0.912582	0.711518
c2	M120	MESO	2	13	M2		HOMOPHILIC_CELL_ADHESION_VIA_PLASMA_MEMBRANE_ADHESION_MOLECULES	0.816622	0.414294
c2	M546	MESO	3	12	M84	PCDHB10	NA	1.54354	0.0825005
c2	M625	MESO	3	10	M109	PCDHGA6,PCDHGA7	NA	0.815869	0.407197
c2	M123	OV	4	40	M20	PCDHB10,PCDHA1	HOMOPHILIC_CELL_ADHESION_VIA_PLASMA_MEMBRANE_ADHESION_MOLECULES	0.808786	0.161264
c2	M124	OV	4	16	M20	PCDHGA5	HOMOPHILIC_CELL_ADHESION_VIA_PLASMA_MEMBRANE_ADHESION_MOLECULES	1.01122	0.940969
c2	M20	OV	3	56	M2	PCDHB10,PCDHA1	HOMOPHILIC_CELL_ADHESION_VIA_PLASMA_MEMBRANE_ADHESION_MOLECULES	0.774883	0.0925631
c2	M293	OV	5	21	M123	PCDHB10	HOMOPHILIC_CELL_ADHESION_VIA_PLASMA_MEMBRANE_ADHESION_MOLECULES	0.828709	0.212636
c2	M294	OV	5	19	M123	PCDHA1	HOMOPHILIC_CELL_ADHESION_VIA_PLASMA_MEMBRANE_ADHESION_MOLECULES	0.875342	0.378284
c2	M295	OV	5	11	M124		HOMOPHILIC_CELL_ADHESION_VIA_PLASMA_MEMBRANE_ADHESION_MOLECULES	1.05407	0.727457
c2	M464	OV	6	16	M293	PCDHB10	HOMOPHILIC_CELL_ADHESION_VIA_PLASMA_MEMBRANE_ADHESION_MOLECULES	0.749447	0.0568713
c2	M467	OV	6	15	M294	PCDHA1	HOMOPHILIC_CELL_ADHESION_VIA_PLASMA_MEMBRANE_ADHESION_MOLECULES	0.995028	0.97364
c2	M261	PRAD	3	33	M63	PCDHB8	HOMOPHILIC_CELL_ADHESION_VIA_PLASMA_MEMBRANE_ADHESION_MOLECULES	0.615211	0.3599
c2	M529	PRAD	4	12	M244	PCDHGA6,PCDHGA5	NA	0.725797	0.543387
c2	M618	PRAD	4	18	M261	PCDHB8,PCDHB12	HOMOPHILIC_CELL_ADHESION_VIA_PLASMA_MEMBRANE_ADHESION_MOLECULES	1.65004	0.342602
c2	M619	PRAD	4	15	M261	PCDHAC1,PCDHA2	HOMOPHILIC_CELL_ADHESION_VIA_PLASMA_MEMBRANE_ADHESION_MOLECULES	0.607242	0.349617
c2	M150	SARC	3	14	M7	PCDHB10	CALCIUM_DEPENDENT_CELL_CELL_ADHESION_VIA_PLASMA_MEMBRANE_CELL_ADHESION_MOLECULES	1.02603	0.901517
c2	M360	SARC	3	15	M29	PCDHA12	HOMOPHILIC_CELL_ADHESION_VIA_PLASMA_MEMBRANE_ADHESION_MOLECULES	0.989514	0.959494
c2	M109	SKCM	2	38	M3		HOMOPHILIC_CELL_ADHESION_VIA_PLASMA_MEMBRANE_ADHESION_MOLECULES	0.608659	0.196673
c2	M1303	SKCM	4	10	M594	PCDHA2	NA	0.750113	0.443206
c2	M1304	SKCM	4	12	M594		HOMOPHILIC_CELL_ADHESION_VIA_PLASMA_MEMBRANE_ADHESION_MOLECULES	0.763462	0.487219
c2	M593	SKCM	3	16	M109	PCDHB8	HOMOPHILIC_CELL_ADHESION_VIA_PLASMA_MEMBRANE_ADHESION_MOLECULES	0.690151	0.326547
c2	M594	SKCM	3	22	M109		HOMOPHILIC_CELL_ADHESION_VIA_PLASMA_MEMBRANE_ADHESION_MOLECULES	0.730493	0.406607
c2	M701	STAD	6	10	M191		NA	1.72111	0.00236982
c2	M87	THCA	3	16	M8	PCDHB10,PCDHB12	CALCIUM_DEPENDENT_CELL_CELL_ADHESION_VIA_PLASMA_MEMBRANE_CELL_ADHESION_MOLECULES	0.667025	0.176519
c2	M107	THYM	3	20	M5	PCDHB12,PCDHB8	HOMOPHILIC_CELL_ADHESION_VIA_PLASMA_MEMBRANE_ADHESION_MOLECULES	2.86929	0.0292805
c2	M95	THYM	3	13	M5	PCDHA8	HOMOPHILIC_CELL_ADHESION_VIA_PLASMA_MEMBRANE_ADHESION_MOLECULES	1.95337	0.148271
c2	M244	UCEC	3	13	M26	PCDHA2	HOMOPHILIC_CELL_ADHESION_VIA_PLASMA_MEMBRANE_ADHESION_MOLECULES	1.19841	0.410867
c2	M54	UCEC	5	20	M8	PCDHB10	HOMOPHILIC_CELL_ADHESION_VIA_PLASMA_MEMBRANE_ADHESION_MOLECULES	0.894322	0.613516
c2	M60	UCEC	5	17	M8	PCDHGA2,PCDHGA5	HOMOPHILIC_CELL_ADHESION_VIA_PLASMA_MEMBRANE_ADHESION_MOLECULES	1.1688	0.479947
c2	M121	UCS	3	13	M6	PCDHB12,PCDHB10	NA	0.760316	0.419577
c2	M198	UCS	3	18	M14		HOMOPHILIC_CELL_ADHESION_VIA_PLASMA_MEMBRANE_ADHESION_MOLECULES	0.658761	0.237033
c2	M745	UCS	4	10	M198	PCDHGA6,PCDHGA5	NA	0.987919	0.971417
c2	M431	UVM	4	11	M82	PCDHB10	HOMOPHILIC_CELL_ADHESION_VIA_PLASMA_MEMBRANE_ADHESION_MOLECULES	0.238461	0.0132809
c20	M72	BLCA	4	28	M10	LOC96610,FCRL5,MGC29506,TNFRSF17	ENDOPLASMIC_RETICULUM_UNFOLDED_PROTEIN_RESPONSE	0.844202	0.269588
c20	M296	BRCA	5	38	M27	FCRL5,TNFRSF17	NA	0.658614	0.0172505
c20	M1018	CESC	5	35	M312	FCRL5	NA	0.582732	0.0392889
c20	M1509	CESC	6	23	M1018	FCRL5	POSITIVE_REGULATION_OF_INTERLEUKIN_10_PRODUCTION	0.59717	0.0491287
c20	M72	COAD	4	36	M12	FCRL5,LOC96610	NA	0.87186	0.579312
c20	M1385	HNSC	6	40	M760	CD79A,FCRL5,TNFRSF17,MGC29506	NA	0.631438	0.00114597
c20	M760	HNSC	5	56	M190	CD79A,FAM46C,FCRL5,TNFRSF17	NEGATIVE_REGULATION_OF_RESPONSE_TO_ENDOPLASMIC_RETICULUM_STRESS	0.687153	0.00767456
c20	M178	KIRC	5	45	M18	MGC29506,POU2AF1,LOC96610,FCRL5	NA	1.5984	0.00255107
c20	M488	KIRP	5	13	M78	LOC96610	NA	2.21379	0.0137507
c20	M1523	LUAD	7	27	M1118	LOC96610,MGC29506,TNFRSF17	NA	0.652029	0.00814212
c20	M1652	LUSC	7	20	M950	MGC29506,LOC96610	ENDOPLASMIC_RETICULUM_UNFOLDED_PROTEIN_RESPONSE	1.21067	0.217201
c20	M1416	MESO	5	25	M781	LOC96610,TNFRSF17	DETECTION_OF_CHEMICAL_STIMULUS_INVOLVED_IN_SENSORY_PERCEPTION_OF_TASTE	0.745032	0.237777
c20	M987	READ	6	45	M291	FCRL5,ADAM6	NA	1.22004	0.665537
c20	M1393	SKCM	6	28	M758	FCRL5,TNFRSF17	NEGATIVE_REGULATION_OF_MYOTUBE_DIFFERENTIATION	0.648307	0.248071
c20	M182	SKCM	4	38	M5	FCRL5,TNFRSF17	B_CELL_DIFFERENTIATION	0.547244	0.111709
c20	M758	SKCM	5	34	M182	FCRL5,TNFRSF17	B_CELL_DIFFERENTIATION	0.635241	0.226849
c20	M1310	STAD	8	15	M1113	MGC29506	UBIQUITIN_DEPENDENT_ERAD_PATHWAY	1.2383	0.220136
c20	M412	UCEC	6	25	M83	FCRL5,LOC96610	B_CELL_ACTIVATION	0.714416	0.128535
c20	M947	UCEC	7	15	M412	FCRL5,LOC96610	NA	0.613248	0.0287891
c200	M764	BLCA	4	13	M188	EBPL	NA	1.03403	0.827063
c200	M84	SARC	3	14	M3	CDADC1	NA	0.872681	0.512
c201	M774	BLCA	4	22	M193	PPAN	NA	0.935366	0.663031
c201	M1051	SARC	4	19	M367	MRPL4	NA	0.976127	0.907317
c202	M779	BLCA	4	29	M195	PRPF8,PAFAH1B1	VESICLE_CYTOSKELETAL_TRAFFICKING	1.19754	0.241228
c202	M737	LUSC	5	34	M209	PRPF8	NEUROMUSCULAR_PROCESS_CONTROLLING_BALANCE	1.29002	0.10076
c203	M1062	BRCA	5	10	M497	RPL10A	NA	1.01581	0.927794
c203	M77	TGCT	3	10	M2	RPL10A	NA	1.16574	0.655606
c204	M1095	BRCA	5	49	M512	TSSC4,MRPL23	NA	0.791395	0.182192
c204	M346	LGG	4	26	M60	PTDSS2,ARFIP2	NA	0.830123	0.202848
c205	M132	BRCA	3	136	M21	COBRA1,SSNA1,MRPL41	NA	1.13494	0.464119
c205	M113	SARC	3	90	M7	EDF1,SSNA1,DPM2	NA	0.960965	0.848277
c206	M133	BRCA	3	160	M21	SCAF1,IRF2BP1,HSPBP1,ZNF628,PRPF31,EPN1,FAM98C,ZNF524	NA	1.08249	0.646034
c206	M208	LUSC	4	132	M25	SCAF1,PRPF31,ZNF574,CNOT3,HSPBP1,RUVBL2,ZNF787,GLTSCR1	SIGNAL_TRANSDUCTION_IN_ABSENCE_OF_LIGAND	0.924669	0.61818
c207	M137	BRCA	3	142	M21	GPS1,ASPSCR1,ANAPC11,MRPL12,C17orf90,MRPS7	NA	0.899763	0.542227
c207	M83	ESCA	2	82	M1	MRPL12,FAM104A,MRPS7	NA	1.26646	0.407704
c208	M1402	BRCA	5	11	M872	SCRIB,ZNF707	NA	1.03084	0.860089
c208	M1314	LUSC	6	13	M574	CPSF1,ZNF707	NA	0.929854	0.645719
c209	M1511	BRCA	6	13	M1095	MRPL23	NA	0.783157	0.161876
c209	M510	PAAD	4	13	M112	PSMD13	REGULATION_OF_CELLULAR_AMINO_ACID_METABOLIC_PROCESS	1.29713	0.220286
c21	M200	BRCA	3	21	M22	ZNF20	NA	1.03776	0.829737
c21	M730	BRCA	4	12	M200		NA	0.985698	0.933382
c21	M1053	CESC	5	30	M318	ZNF799	NA	0.694283	0.170701
c21	M1564	CESC	6	14	M1053	ZNF799,ZNF443	NA	0.648357	0.0999245
c21	M1565	CESC	6	16	M1053		NA	0.725707	0.230985
c21	M243	ESCA	3	14	M31	ZNF44,ZNF441	NA	0.746501	0.3016
c21	M906	ESCA	4	10	M243	ZNF44	NA	0.744706	0.29921
c21	M105	HNSC	4	23	M15	ZNF799	NA	0.580269	0.000121079
c21	M1411	LUAD	6	19	M789	ZNF441,ZNF709	NA	0.64989	0.00775234
c21	M231	LUAD	4	82	M40	ZNF441	DNA_INTEGRATION	0.655877	0.00907171
c21	M789	LUAD	5	36	M231	ZNF763,ZNF441	NA	0.659293	0.0103858
c21	M460	LUSC	5	32	M112	ZNF443	NA	1.14322	0.388772
c21	M1045	OV	6	11	M569	ZNF564,ZNF791	NA	0.880834	0.402333
c21	M569	OV	5	29	M334	ZNF136,ZNF20	NA	0.818249	0.184131
c21	M166	SARC	3	51	M7	ZNF441,ZNF627	NA	1.41109	0.102733
c21	M639	SARC	4	29	M166	ZNF441	NA	1.17857	0.431634
c21	M255	UCEC	3	19	M28		NA	0.855768	0.479796
c21	M294	UCS	3	28	M34	ZNF440	NA	1.54813	0.228447
c21	M890	UCS	4	12	M294	ZNF440	NA	1.96915	0.0696303
c210	M173	BRCA	3	60	M22	APPBP2,MED13	NA	0.869414	0.417963
c210	M525	OV	5	52	M327	MED13	NA	1.02422	0.873797
c211	M245	BRCA	3	15	M22	PRPF8	NA	0.970941	0.864042
c211	M839	OV	6	19	M506	TSR1	NA	1.054	0.72786
c212	M259	BRCA	3	11	M22	PPP1R8	NA	0.98758	0.942407
c212	M1190	OV	6	19	M629	DNAJC8	NA	1.15244	0.348564
c213	M491	BRCA	4	15	M121	UQCR10	NA	0.831825	0.288121
c213	M420	LUAD	5	19	M114	RBX1,TXN2	NA	1.12533	0.457771
c214	M850	BRCA	4	11	M263	ZNF384	NA	0.965542	0.838712
c214	M246	SARC	3	13	M9	ZNF384	NA	1.08909	0.681425
c215	M855	BRCA	4	12	M263	RINT1	NA	1.0491	0.78185
c215	M272	ESCA	3	13	M37	ORC5L	TRNA_PROCESSING	0.768571	0.35585
c216	M113	CESC	2	38	M3	TOPORS	NA	0.94755	0.836115
c216	M154	READ	3	52	M11	TOPORS,KLHL9	NA	0.706229	0.455018
c217	M1148	CESC	4	10	M400	RCOR3	NA	1.09631	0.722724
c217	M502	HNSC	5	13	M97	ANGEL2	NA	0.813132	0.13577
c218	M1251	CESC	4	12	M524		NA	0.883716	0.632874
c218	M1708	LUAD	8	11	M1464	PAK2	NA	1.25682	0.150693
c219	M1317	CESC	4	27	M624	COG6,ZC3H13	NA	1.64208	0.0622981
c219	M492	LUSC	5	47	M124	UTP14C,COG3	NA	1.03338	0.831989
c22	M231	BRCA	3	20	M22	ZNF43	NA	0.997332	0.987666
c22	M1567	CESC	6	24	M1055	ZNF91	DNA_INTEGRATION	1.24785	0.39368
c22	M244	ESCA	3	15	M31		NA	1.0336	0.908309
c22	M1346	GBM	5	18	M734	ZNF100	NA	0.845973	0.383708
c22	M734	GBM	4	30	M195	ZNF100,ZNF738	DNA_INTEGRATION	0.767417	0.169244
c22	M1575	HNSC	7	15	M1198	ZNF493	NA	0.712718	0.0154416
c22	M541	HNSC	5	34	M109	ZNF493,ZNF737	NA	0.710936	0.0145656
c22	M318	KIRP	3	12	M50	ZNF254,ZNF253	NA	1.07454	0.816906
c22	M1408	LUAD	6	34	M788	ZNF43	DNA_INTEGRATION	0.816591	0.203329
c22	M1696	LUAD	7	16	M1408	ZNF708	NA	0.791749	0.143646
c22	M1697	LUAD	7	18	M1408	ZNF43	NA	0.614356	0.00264753
c22	M788	LUAD	5	46	M231	ZNF43	DNA_INTEGRATION	0.752006	0.0743456
c22	M102	LUSC	4	35	M21	ZNF737	NA	1.1293	0.431966
c22	M426	LUSC	5	14	M102	ZNF708	NA	1.10918	0.502765
c22	M530	OV	5	37	M327	ZNF738	DNA_INTEGRATION	0.816118	0.181029
c22	M917	OV	6	22	M530	ZNF100,ZNF738	NA	0.905779	0.51521
c22	M1115	READ	5	10	M388	ZNF253	NA	0.744665	0.512991
c22	M730	STAD	6	16	M208	ZNF708,ZNF493	NA	0.952093	0.777655
c22	M135	UCEC	3	17	M16	ZNF100,ZNF431	NA	0.92106	0.708837
c220	M141	CESC	2	25	M3	VPS52,TRIM39	NA	0.940588	0.813959
c220	M409	SARC	3	21	M39	BAT3	MACROMOLECULE_DEACYLATION	1.79962	0.00535346
c221	M328	CESC	3	13	M8	MRPS12	NA	0.897213	0.67516
c221	M1374	OV	7	18	M763	ECH1	REGULATION_OF_TRANSCRIPTION_FROM_RNA_POLYMERASE_II_PROMOTER_IN_RESPONSE_TO_HYPOXIA	0.972007	0.850835
c222	M41	CESC	2	40	M3	CHCHD8	PROTEIN_COFACTOR_LINKAGE	0.845112	0.516256
c222	M403	LUSC	5	61	M96	TIMM8B,ATP5L,TMEM126A	NA	0.84692	0.294214
c223	M444	CESC	3	10	M31	POLR2K	NA	0.934588	0.794065
c223	M1061	ESCA	4	10	M343	DCAF13,MTERFD1	NA	1.40976	0.22384
c224	M509	CESC	3	31	M52	UXT,TIMM17B	RNA_SPLICING	0.619058	0.067931
c224	M1208	ESCA	4	28	M426	TIMM17B	NA	1.45742	0.180756
c225	M530	CESC	3	18	M57	SCAND1	NA	1.04605	0.861943
c225	M438	LUAD	5	13	M121	SCAND1	NA	1.0748	0.649389
c226	M552	CESC	3	16	M64	TAF1C	NA	0.842718	0.510417
c226	M464	LIHC	4	13	M79	TAF1C	NA	0.861548	0.410319
c227	M571	CESC	3	12	M73	NKAP	SNORNA_PROCESSING	0.748816	0.265457
c227	M857	OV	6	19	M511	NKAP	NA	1.14302	0.375004
c228	M583	CESC	3	10	M77	NAP1L4	NA	0.806721	0.407108
c228	M382	HNSC	5	10	M78	C11orf58	NA	1.30199	0.060314
c229	M586	CESC	3	14	M78	NIPBL,KIAA0947	NA	1.18382	0.519597
c229	M407	ESCA	3	21	M62	NIPBL,C5orf51	POSITIVE_REGULATION_OF_PROTEIN_POLYUBIQUITINATION	0.838919	0.537497
c23	M120	BLCA	3	97	M21	RDBP,SNRPC,MRPL14	TRANSLATIONAL_ELONGATION	0.992312	0.959849
c23	M131	BRCA	3	104	M21	RDBP,SNRPC,CSNK2B,BAT3,EHMT2	AMINO_ACID_ACTIVATION	1.0779	0.664483
c23	M85	ESCA	2	74	M1	SNRPC,CSNK2B,RDBP,WDR46	NA	0.623507	0.106708
c23	M116	HNSC	4	109	M15	SNRPC,RDBP	NCRNA_METABOLIC_PROCESS	1.26468	0.0914809
c23	M565	HNSC	5	93	M116	SNRPC,RDBP	AMINO_ACID_ACTIVATION	1.22167	0.149839
c23	M246	LIHC	4	67	M29	CSNK2B,MEA1,SNRPC,TOMM6	NCRNA_METABOLIC_PROCESS	1.05864	0.752441
c23	M29	LIHC	3	124	M7	CSNK2B,MEA1,SNRPC,TOMM6,EHMT2,TRIM39,BAT3	AMINO_ACID_ACTIVATION	1.13855	0.47182
c23	M332	LUAD	5	57	M86	SNRPC,MRPL2	RNA_5_END_PROCESSING	1.09091	0.58607
c23	M856	LUAD	6	49	M332	SNRPC,MRPL2,LSM2	TRANSCRIPTION_ELONGATION_FROM_RNA_POLYMERASE_I_PROMOTER	1.05934	0.718032
c23	M86	LUAD	4	74	M10	SNRPC,MRPL2,LSM2	MITOCHONDRIAL_TRANSLATIONAL_TERMINATION	1.02691	0.867699
c23	M1036	LUSC	6	89	M404	SNRPC,RDBP,CSNK2B	TRANSLATIONAL_ELONGATION	0.76182	0.0802344
c23	M404	LUSC	5	107	M96	SNRPC,RDBP,CSNK2B	TRANSLATIONAL_ELONGATION	0.817171	0.193511
c23	M490	OV	5	121	M326	SNRPC,RDBP,PPP2R5D,TJAP1,CSNK2B,XPO5,MEA1	TRANSLATIONAL_ELONGATION	0.79703	0.134017
c23	M1156	SARC	4	43	M403	CSNK2B,RDBP	TRANSCRIPTION_ELONGATION_FROM_RNA_POLYMERASE_I_PROMOTER	1.33874	0.161048
c23	M403	SARC	3	56	M39	CSNK2B,RDBP	TRANSCRIPTION_ELONGATION_FROM_RNA_POLYMERASE_I_PROMOTER	1.52332	0.0439833
c23	M29	SKCM	2	158	M3	CSNK2B,BAT3,C6orf47,RDBP,PPP2R5D,PPP1R11,MRPL2,XPO5	NA	1.28306	0.505477
c23	M258	STAD	5	54	M26	RDBP,EHMT2,RPP21	NA	0.917327	0.619274
c23	M26	STAD	4	87	M8	RDBP,RPP21,CSNK2B,EHMT2	MITOCHONDRIAL_TRANSLATION	0.943426	0.73721
c230	M69	CESC	2	42	M3	KARS,CIAPIN1	NCRNA_PROCESSING	1.08177	0.760911
c230	M66	STAD	4	57	M9	COX4NB,CIRH1A	NA	0.850192	0.352163
c231	M737	CESC	3	30	M135	PRPF8	VESICLE_CYTOSKELETAL_TRAFFICKING	1.2589	0.375798
c231	M411	PAAD	4	29	M101	PRPF8,ANKFY1,ZZEF1	MITOCHONDRIAL_DNA_METABOLIC_PROCESS	0.672657	0.0649572
c232	M81	CESC	2	58	M3	UBE4A,RNF214	NA	1.1492	0.591185
c232	M155	HNSC	4	42	M15	ARCN1,RNF214	NA	1.13639	0.35728
c233	M125	COAD	4	20	M16	D4S234E	MESONEPHRIC_TUBULE_MORPHOGENESIS	0.7396	0.212355
c233	M293	READ	5	22	M21	SCUBE1	COLLAGEN_ACTIVATED_TYROSINE_KINASE_RECEPTOR_SIGNALING_PATHWAY	1.53652	0.35944
c234	M485	COAD	6	13	M242	SPDYE1	NA	1.32617	0.241557
c234	M1250	LUAD	6	13	M690	SPDYE1,SPDYE6	NA	0.985497	0.927663
c235	M509	COAD	6	10	M274	NME2P1	NA	0.888324	0.626987
c235	M541	PAAD	4	20	M112	FLJ44635,RPL19P12	NA	1.05587	0.797627
c236	M516	COAD	6	14	M275		TRANSLATIONAL_INITIATION	0.865521	0.550091
c236	M695	KIRP	4	13	M180	RPL19,RPL38	NA	1.72811	0.0796561
c237	M57	COAD	4	197	M9	AKAP11,MRPS31,KIAA1704,N4BP2L2,MED4,CUL4A,RNASEH2B,KPNA3,FAM48A,UTP14C	NA	0.866069	0.551344
c237	M69	ESCA	2	114	M1	COG3,KIAA1704,TPP2	NA	1.11739	0.693432
c238	M81	COAD	4	18	M12	HTR3E,FOXI1,SH2D6	SENSORY_PERCEPTION_OF_TASTE	1.17482	0.505919
c238	M288	READ	5	14	M20	GNG13	NA	0.84985	0.717794
c239	M1171	ESCA	4	13	M399	TRAPPC10	NA	0.753964	0.315136
c239	M1189	LUAD	6	12	M672	MCM3AP,DIP2A	NA	0.923519	0.617564
c24	M226	BLCA	3	24	M23	CDC123	NA	0.984994	0.921365
c24	M871	BLCA	4	14	M226	CDC123	NA	0.921168	0.591704
c24	M874	BRCA	4	19	M267	CDC123,RBM17,RPP38	TRNA_PROCESSING	1.33459	0.096757
c24	M488	CESC	3	11	M44	CDC123	NA	1.20001	0.486775
c24	M1231	ESCA	4	15	M436	CDC123	CARBOHYDRATE_CATABOLIC_PROCESS	0.590133	0.069041
c24	M1773	ESCA	5	11	M1232	KIN,PRPF18,RBM17	NA	0.695911	0.200514
c24	M436	ESCA	3	46	M67		TRNA_METABOLIC_PROCESS	0.548151	0.0407673
c24	M410	HNSC	5	16	M82		TRNA_PROCESSING	1.14131	0.344019
c24	M415	LGG	4	22	M76	CDC123	REGULATION_OF_DEVELOPMENT_HETEROCHRONIC	0.610207	0.000893207
c24	M74	LUAD	4	23	M9	CDC123	STEROL_BIOSYNTHETIC_PROCESS	1.0986	0.555334
c24	M520	LUSC	5	33	M129	CDC123,HSPA14	ISOPRENOID_BIOSYNTHETIC_PROCESS	0.882258	0.423482
c24	M135	MESO	2	23	M2		TRNA_PROCESSING	0.64062	0.070913
c24	M686	MESO	3	14	M135	RBM17	NA	0.763796	0.272678
c24	M264	SARC	3	27	M10	CDC123	NA	1.16897	0.452598
c24	M795	SARC	4	15	M264	CDC123,RPP38	ISOPRENOID_BIOSYNTHETIC_PROCESS	1.18307	0.419606
c24	M125	STAD	4	25	M11	CDC123	ISOPRENOID_BIOSYNTHETIC_PROCESS	0.867941	0.416453
c24	M373	UCS	3	22	M54	CDC123	ISOPRENOID_BIOSYNTHETIC_PROCESS	1.29144	0.453719
c24	M54	UCS	2	43	M2	HSPA14,GTPBP4,CDC123	ISOPRENOID_BIOSYNTHETIC_PROCESS	0.86936	0.686369
c240	M1234	ESCA	4	19	M438	ACD	ESTABLISHMENT_OF_RNA_LOCALIZATION	1.17204	0.573802
c240	M424	LUSC	5	12	M101		RIBONUCLEOPROTEIN_COMPLEX_BIOGENESIS	1.09687	0.548412
c241	M1604	ESCA	5	14	M888	IFIT3	DEFENSE_RESPONSE_TO_VIRUS	0.927855	0.790509
c241	M107	PRAD	4	10	M10	PARP14,DDX60	NA	1.17396	0.762115
c242	M1664	ESCA	5	11	M952	POP7	NA	0.848502	0.559391
c242	M1381	PAAD	6	20	M1060	ZNHIT1	NA	0.883722	0.560588
c243	M207	ESCA	3	22	M25	ZNF606,ZNF350	NA	1.74627	0.0511855
c243	M708	STAD	6	23	M193	ZNF528	NA	1.76015	0.00160567
c244	M380	ESCA	3	14	M56		NA	2.33731	0.00447621
c244	M1267	LUSC	6	17	M525	COMMD2,SERP1	NA	0.719181	0.0358703
c245	M426	ESCA	3	40	M64	TIMM17B	NA	1.23933	0.444832
c245	M108	HNSC	4	36	M15	TIMM17B	RNA_SPLICING_VIA_TRANSESTERIFICATION_REACTIONS	1.03177	0.822103
c246	M46	ESCA	2	146	M1	RPL8,PUF60,C8orf59,NUDCD1	ENDONUCLEOLYTIC_CLEAVAGE_INVOLVED_IN_RRNA_PROCESSING	0.807913	0.454689
c246	M482	OV	5	252	M326	CYHR1,HSF1,SCRIB,DCAF13,EXOSC4,FAM83H,ZNF623,MTDH,STK3,CYC1,SHARPIN	NA	1.12454	0.438904
c247	M787	ESCA	4	12	M176	RNF121	NA	0.802369	0.440996
c247	M1019	HNSC	6	10	M411	RNF121,C11orf59	NA	1.06247	0.662491
c248	M819	ESCA	4	14	M187	C19orf6,CSNK1G2	NA	0.939866	0.82532
c248	M951	OV	6	20	M542	CSNK1G2,REXO1	NA	0.912898	0.545097
c249	M826	ESCA	4	33	M194	NDUFA13,RFXANK	NA	1.00755	0.978746
c249	M424	LUAD	5	23	M115	COPE	NA	0.781814	0.121714
c25	M695	BLCA	4	19	M168	MRPL51,MLF2	GLYCOLYTIC_PROCESS_THROUGH_FRUCTOSE_6_PHOSPHATE	0.809059	0.169008
c25	M1386	BRCA	5	14	M862	MLF2	RRNA_BASE_METHYLATION	1.09564	0.597016
c25	M862	BRCA	4	27	M264	MRPL51,MLF2	GLYCOLYTIC_PROCESS_THROUGH_FRUCTOSE_6_PHOSPHATE	1.09095	0.61348
c25	M580	CESC	3	27	M76	MRPL51	GLYCOLYTIC_PROCESS_THROUGH_FRUCTOSE_6_PHOSPHATE	1.1329	0.629796
c25	M1247	ESCA	4	22	M445	MLF2,MRPL51,PHB2	RRNA_BASE_METHYLATION	1.53379	0.141604
c25	M445	ESCA	3	33	M70	MLF2,MRPL51,PHB2	GLYCOLYTIC_PROCESS_THROUGH_FRUCTOSE_6_PHOSPHATE	1.38172	0.265899
c25	M373	HNSC	5	18	M78	EMG1,MLF2	RRNA_BASE_METHYLATION	1.45927	0.00673957
c25	M1032	LIHC	5	16	M380	PHB2,NDUFA9,USP5	NA	0.988717	0.950266
c25	M380	LIHC	4	24	M59		NEGATIVE_REGULATION_OF_INTRACELLULAR_ESTROGEN_RECEPTOR_SIGNALING_PATHWAY	1.20286	0.311566
c25	M467	LUAD	5	21	M144		NA	1.38833	0.0416891
c25	M974	LUAD	6	13	M467	NDUFA9,MRPL51	NA	1.35782	0.05698
c25	M135	PAAD	5	10	M18	MRPL51	NA	0.864201	0.492892
c25	M18	PAAD	4	28	M5	MLF2	GLYCOLYTIC_PROCESS_THROUGH_FRUCTOSE_6_PHOSPHATE	1.05938	0.786168
c25	M610	READ	4	13	M131	MRPL51	RRNA_BASE_METHYLATION	1.07992	0.864042
c25	M1081	SARC	4	25	M373	MRPL51,MLF2	RRNA_BASE_METHYLATION	1.01939	0.926273
c25	M1511	SARC	5	11	M1081	MLF2	NA	1.04831	0.820133
c25	M341	STAD	5	23	M50	TPI1	RRNA_BASE_METHYLATION	0.916172	0.616735
c25	M50	STAD	4	37	M9	TPI1	NA	0.819228	0.256397
c250	M839	ESCA	4	23	M203	SCAF1	PEPTIDYL_THREONINE_MODIFICATION	1.41419	0.219308
c250	M385	HNSC	5	20	M78	SCAF1	POLYSACCHARIDE_BIOSYNTHETIC_PROCESS	0.829801	0.182811
c251	M941	ESCA	4	18	M267	NOL7	TRNA_METABOLIC_PROCESS	1.25757	0.419722
c251	M88	STAD	4	19	M10	NOL7	NA	1.29341	0.142228
c252	M949	ESCA	4	15	M269	RBMX2	NA	1.67338	0.069528
c252	M404	HNSC	5	15	M82	RBMX2,NDUFA1	NA	1.49359	0.0043206
c253	M22	GBM	3	13	M4	HOXD9	PATTERN_SPECIFICATION_PROCESS	1.43473	0.0643899
c253	M87	LUSC	4	11	M18	HOXD11	PATTERN_SPECIFICATION_PROCESS	1.04661	0.76781
c254	M23	GBM	3	30	M4		RESPONSE_TO_ETHER	1.51462	0.0315548
c254	M49	LGG	3	21	M5		NA	1.4088	0.0198291
c255	M287	GBM	4	19	M23	METTL1	RESPONSE_TO_ETHER	1.31599	0.152197
c255	M877	SARC	4	19	M298	CDK4,TSPAN31	NA	1.03787	0.85789
c256	M288	GBM	4	11	M23	DTX3,PIP4K2C	NA	1.20656	0.328006
c256	M151	SARC	3	16	M7	MBD6	NA	1.43448	0.0848474
c257	M551	GBM	4	16	M119	CDC123,HSPA14	TRNA_PROCESSING	0.711711	0.0811571
c257	M998	OV	6	14	M554	CDC123,HSPA14	NA	1.04809	0.756758
c258	M1060	HNSC	6	19	M432	MRFAP1L1,STX18	NA	0.840459	0.212111
c258	M762	LUSC	5	19	M216	ZCCHC4,TMEM128	NA	0.949763	0.738135
c259	M1283	HNSC	6	13	M624	XRCC6	NA	1.28836	0.0685917
c259	M419	LUAD	5	13	M114	ADSL	NA	1.14854	0.38565
c26	M98	BRCA	4	12	M17		REGIONALIZATION	0.978628	0.900944
c26	M204	CESC	3	10	M5		NA	2.39638	0.00146955
c26	M1450	CHOL	5	10	M607	HOXA1	NA	0.89107	0.807482
c26	M86	GBM	4	15	M5		EMBRYONIC_SKELETAL_SYSTEM_DEVELOPMENT	0.984612	0.935341
c26	M145	HNSC	4	11	M15	HOXA10	NA	1.04306	0.761239
c26	M176	KICH	4	12	M20	HOXA10	EMBRYONIC_SKELETAL_SYSTEM_DEVELOPMENT	3.83224	0.0939991
c26	M20	KICH	3	22	M3		ANTERIOR_POSTERIOR_PATTERN_SPECIFICATION	1.36091	0.646077
c26	M104	LGG	4	28	M9	HOXA5	PATTERN_SPECIFICATION_PROCESS	2.13069	6.94018e-07
c26	M205	LIHC	4	10	M20		NA	1.11421	0.551741
c26	M164	LUAD	4	13	M23		EMBRYONIC_SKELETAL_SYSTEM_DEVELOPMENT	1.05396	0.740433
c26	M42	MESO	2	12	M2	HOXA1	NA	1.22411	0.421538
c26	M33	OV	4	19	M4		REGIONALIZATION	1.25035	0.138243
c26	M43	READ	3	13	M9		REGIONALIZATION	2.58704	0.0451789
c26	M114	SARC	3	10	M7	HOXA10	NA	1.17005	0.450749
c26	M276	SKCM	3	11	M30	HOXA4	EMBRYONIC_SKELETAL_SYSTEM_MORPHOGENESIS	1.13651	0.735727
c26	M941	TGCT	4	18	M308		ANTERIOR_POSTERIOR_PATTERN_SPECIFICATION	2.50851	0.0147728
c26	M164	UCS	3	23	M9		EMBRYONIC_SKELETAL_SYSTEM_DEVELOPMENT	1.27859	0.479797
c260	M408	HNSC	5	21	M82	PPIA	PROTEIN_PEPTIDYL_PROLYL_ISOMERIZATION	1.12711	0.388521
c260	M1053	SARC	4	12	M367	PSMA2	NA	1.0142	0.946031
c261	M431	HNSC	5	20	M87	GAK,CTBP1	NA	0.687082	0.00741548
c261	M131	LIHC	3	30	M10	CTBP1	NA	0.934164	0.706484
c262	M458	HNSC	5	26	M92	RNASEK,GABARAP	NA	1.07694	0.593719
c262	M681	LUSC	5	29	M191	TRAPPC1	NA	0.899007	0.490391
c263	M561	HNSC	5	12	M114		NA	1.2163	0.159554
c263	M415	LUSC	5	18	M98	EIF1AX	POLYAMINE_METABOLIC_PROCESS	0.90161	0.503638
c264	M584	HNSC	5	29	M121	BUD31,POLR2J	NA	1.11286	0.440263
c264	M1098	LUSC	6	37	M429	POLR2J,COPS6,BUD31	AMINO_ACID_BETAINE_METABOLIC_PROCESS	1.01163	0.940252
c265	M647	HNSC	5	10	M141	PPP2CB	NA	0.87353	0.330511
c265	M612	LUSC	5	13	M160	DCTN6,PPP2CB	PEPTIDYL_SERINE_DEPHOSPHORYLATION	0.915361	0.56679
c266	M663	HNSC	5	20	M147	MINK1,PAFAH1B1	VESICLE_CYTOSKELETAL_TRAFFICKING	0.907354	0.485382
c266	M762	LUAD	5	14	M226	KIF1C,WDR81	VESICLE_CYTOSKELETAL_TRAFFICKING	0.840794	0.280967
c267	M692	HNSC	5	14	M161		NA	0.982451	0.899491
c267	M362	STAD	5	11	M61	NSUN2	NA	0.866775	0.411967
c268	M167	KICH	4	197	M17	CD2,CCL5,IL2RG,ITK,CD3E,CD247,LCK,SLAMF6,SLAMF1	T_CELL_ACTIVATION	0.586333	0.450701
c268	M20	PCPG	4	212	M4	IL2RG,CD96,CD3E,CD48,CD2,ITGAL,CCL5,POU2AF1	T_CELL_ACTIVATION	0.895443	0.805135
c269	M77	KIRC	3	43	M7	EPB42	GAS_TRANSPORT	1.09361	0.557304
c269	M22	PCPG	4	43	M4		GAS_TRANSPORT	1.09058	0.847785
c27	M119	BLCA	3	73	M21	PSMB6	NA	0.911265	0.545155
c27	M477	BLCA	4	54	M119	PSMB6	NA	1.04332	0.7821
c27	M500	BRCA	4	37	M123	PSMB6	REGULATION_OF_INTRACELLULAR_PROTEIN_TRANSPORT	1.00154	0.992896
c27	M10	CESC	2	90	M3	PSMB6,LSMD1,GABARAP	NA	0.827197	0.465863
c27	M171	COAD	4	124	M19	EIF5A,RNMTL1,EIF5AL1,ELAC2	PROTEIN_DNA_COMPLEX_SUBUNIT_ORGANIZATION	1.06606	0.789674
c27	M19	COAD	3	212	M5	EIF5A,SMG6,ANKFY1,FLII,RNMTL1,EIF5AL1,PAFAH1B1,ELAC2,RAI1,CAMTA2	CYTOSOLIC_TRANSPORT	1.24567	0.361433
c27	M174	ESCA	3	104	M21	PSMB6,TRAPPC1,DRG2	NA	1.44391	0.198074
c27	M21	ESCA	2	141	M1	PSMB6,TRAPPC1,DRG2	NA	1.07437	0.800752
c27	M477	GBM	4	47	M100	C1QBP,EIF5AL1	PROTEIN_POLYUBIQUITINATION	1.24878	0.246496
c27	M92	HNSC	4	69	M15	PSMB6,RNASEK	NA	1.13092	0.375482
c27	M53	LIHC	3	77	M10		NA	0.742124	0.0997833
c27	M113	LUAD	4	47	M14	C1QBP	NA	1.3769	0.0482979
c27	M415	LUAD	5	35	M113	C1QBP	POSITIVE_REGULATION_OF_CELLULAR_AMIDE_METABOLIC_PROCESS	1.37734	0.0472344
c27	M191	LUSC	4	61	M25	TRAPPC1,C1QBP	NA	0.999196	0.99584
c27	M680	LUSC	5	32	M191	C1QBP	NA	0.923409	0.608288
c27	M10	UCS	2	94	M2	PSMB6,C1QBP,RNASEK,EIF5A	RIBOSOME_BIOGENESIS	1.4054	0.319671
c270	M1137	KIRP	6	77	M482	CD3E,CCL5,CD247,LCK,CD2	T_CELL_ACTIVATION	1.31146	0.377943
c270	M1074	THCA	7	77	M646	CD3E,IL2RG	T_CELL_ACTIVATION	1.08385	0.785077
c271	M14	LGG	3	114	M2	OAS2,PARP9,PARP14,HLA.B	DEFENSE_RESPONSE_TO_VIRUS	1.48184	0.0074108
c271	M191	THCA	5	91	M27	TAP1,HLA.F,STAT1,PARP9	DEFENSE_RESPONSE_TO_VIRUS	0.956756	0.881001
c272	M587	LIHC	4	18	M124	HSP90B1,MANF	RESPONSE_TO_ENDOPLASMIC_RETICULUM_STRESS	1.27859	0.174913
c272	M71	LUAD	4	15	M9	PDIA3	RESPONSE_TO_ENDOPLASMIC_RETICULUM_STRESS	1.01298	0.935429
c273	M603	LIHC	4	18	M131	CTBP1	NA	1.03358	0.854696
c273	M1514	LUSC	6	25	M761	CTBP1,GAK	REGULATION_OF_CHOLESTEROL_METABOLIC_PROCESS	1.10533	0.521998
c274	M77	LIHC	3	58	M10	MED6	ESTABLISHMENT_OF_PROTEIN_LOCALIZATION_TO_MITOCHONDRIAL_MEMBRANE	1.08802	0.640706
c274	M162	LUAD	4	52	M22	ERH,COX16	NA	1.24447	0.173999
c275	M1033	LUAD	6	11	M546	FAM91A1	NA	1.6542	0.00177261
c275	M175	SARC	3	10	M7		NA	1.49093	0.057874
c276	M1162	LUAD	6	13	M660	TNKS	MICROTUBULE_CYTOSKELETON_ORGANIZATION_INVOLVED_IN_MITOSIS	0.847078	0.295675
c276	M1093	STAD	6	12	M601		NA	1.0083	0.962053
c277	M1277	LUAD	6	15	M707	BAZ1B	NA	1.32961	0.0731695
c277	M1396	LUSC	6	12	M686	EIF4H	NA	1.00397	0.979509
c278	M131	LUAD	4	42	M16	TMEM223,C11orf83	TRANSLATIONAL_TERMINATION	1.11794	0.485227
c278	M468	LUSC	5	42	M115	TRMT112	TRANSLATIONAL_TERMINATION	0.945402	0.715641
c279	M1376	LUAD	6	13	M769	C22orf30	UBIQUITIN_DEPENDENT_ERAD_PATHWAY	0.847456	0.30034
c279	M1520	LUSC	6	10	M763	C22orf30	NA	0.896698	0.481249
c28	M225	BLCA	3	43	M23	NIPBL,C5orf22	NA	0.982274	0.907019
c28	M869	BLCA	4	36	M225	NIPBL,C5orf22	NA	0.966826	0.82558
c28	M78	CESC	2	42	M3	C5orf22,NIPBL	RESPONSE_TO_IONIZING_RADIATION	1.10526	0.701227
c28	M62	ESCA	2	77	M1	RNASEN	NA	0.775684	0.373367
c28	M161	HNSC	4	37	M15		RESPONSE_TO_IONIZING_RADIATION	0.93013	0.608564
c28	M373	LIHC	4	21	M59	KIAA0947	TOR_SIGNALING	1.3487	0.0978777
c28	M100	LUAD	4	63	M13	RAD1	NA	0.828138	0.234601
c28	M389	LUAD	5	30	M100	RAD1	RESPONSE_TO_ACTIVITY	0.845715	0.290698
c28	M108	LUSC	4	75	M21	RAD1,WDR70	STEROID_BIOSYNTHETIC_PROCESS	0.951318	0.746358
c28	M447	LUSC	5	34	M108	RAD1,WDR70	NA	0.907848	0.530373
c28	M1514	OV	7	13	M854	RAD1	NA	1.01776	0.90705
c28	M510	OV	5	81	M327		NA	0.926259	0.61118
c28	M854	OV	6	63	M510		NA	0.946032	0.712629
c28	M234	SARC	3	37	M9	NIPBL,C5orf51	POSITIVE_REGULATION_OF_ESTABLISHMENT_OF_PROTEIN_LOCALIZATION	1.08389	0.698719
c28	M364	STAD	5	20	M61	RAD1	NA	1.1916	0.313468
c28	M61	STAD	4	38	M9	RAD1	RESPONSE_TO_IONIZING_RADIATION	0.963524	0.831181
c280	M138	LUAD	4	12	M17	NDUFA8	NA	1.05708	0.726831
c280	M1000	STAD	6	11	M543	PSMB7	NA	1.08187	0.650839
c281	M194	LUAD	4	13	M31	ATP5F1,PSMA5	NA	1.37674	0.0500451
c281	M734	MESO	3	10	M164	GNG5,RPF1	NA	0.826064	0.440601
c282	M24	LUAD	3	159	M2	PSMD4,VPS72,DPM3,KRTCAP2,MRPL55,C1orf43,GUK1,SSR2	TRANSLATIONAL_TERMINATION	1.04694	0.772815
c282	M517	OV	5	130	M327	HAX1,VPS72,KRTCAP2,MRPL55	TRANSLATIONAL_TERMINATION	0.769558	0.084359
c283	M278	LUAD	5	15	M68	WBSCR22	NA	1.03196	0.843741
c283	M1623	OV	7	13	M923	MDH2,WBSCR22	NA	0.929657	0.629205
c284	M293	LUAD	5	13	M73	COX4I1	CELLULAR_RESPONSE_TO_NITROGEN_STARVATION	0.888789	0.457358
c284	M1389	OV	7	14	M768	COX4NB	NA	0.893554	0.455442
c285	M301	LUAD	5	12	M76	UXT	NA	0.976166	0.879544
c285	M1052	LUSC	6	12	M410	TIMM17B	TRNA_METHYLATION	0.820705	0.203796
c286	M33	LUAD	3	71	M2	PCMT1,ATG5,VTA1,LYRM2	NA	1.04104	0.799619
c286	M114	LUSC	4	79	M21	PCMT1,TCP1,PSMB1	NA	0.896458	0.484463
c287	M542	LUAD	5	23	M185	UBE2W	NA	1.16117	0.347523
c287	M616	LUSC	5	15	M161	UBE2W	INTRACELLULAR_PROTEIN_TRANSMEMBRANE_TRANSPORT	0.826649	0.231987
c288	M546	LUAD	5	29	M186	NUDCD1,KIAA1429	NA	1.50691	0.0104646
c288	M424	READ	4	23	M54	FAM91A1	NA	1.33667	0.531923
c289	M568	LUAD	5	12	M201	SNX3,ATG5	NEGATIVE_REGULATION_OF_PHAGOCYTOSIS	1.10054	0.546034
c289	M1759	LUSC	7	11	M1158	SNX3	NA	1.05736	0.718855
c29	M235	BLCA	3	17	M23	MED21	NA	1.00535	0.972185
c29	M891	BLCA	4	11	M235	MED21,FGFR1OP2	NA	0.942715	0.699965
c29	M237	BRCA	3	24	M22	MED21	NA	0.957936	0.803092
c29	M447	ESCA	3	16	M70	FGFR1OP2,MED21	NA	1.24289	0.445502
c29	M181	HNSC	4	17	M15		NA	1.57066	0.00131883
c29	M109	LUAD	4	37	M13	C12orf11,MRPS35	NA	1.38659	0.0421692
c29	M405	LUAD	5	28	M109	MRPS35	NA	1.34925	0.0610837
c29	M936	LUAD	6	10	M405	MRPS35	NA	1.59745	0.00381813
c29	M511	LUSC	5	15	M127	FGFR1OP2	NA	1.05901	0.709888
c29	M1084	OV	6	36	M588	MED21	NA	1.1601	0.328274
c29	M1772	OV	7	26	M1084	MED21	NA	1.28508	0.0990364
c29	M588	OV	5	48	M342	MED21	NA	1.09189	0.563
c29	M404	READ	4	34	M49	ETNK1,AEBP2	NA	0.790849	0.602029
c29	M214	STAD	5	12	M16	MED21,FGFR1OP2	NA	1.16515	0.379074
c29	M140	TGCT	3	17	M4	ETNK1	NA	0.764756	0.435826
c29	M562	UCS	4	17	M97	KRAS	NA	1.36898	0.369383
c290	M698	LUAD	5	17	M221	RING1	GLUTAMINE_FAMILY_AMINO_ACID_CATABOLIC_PROCESS	0.678013	0.0158745
c290	M1425	OV	7	10	M782	RXRB	NA	0.889044	0.437208
c291	M700	LUAD	5	17	M221	DMWD,SYMPK	DNA_TEMPLATED_TRANSCRIPTION_TERMINATION	1.37578	0.0458896
c291	M1388	OV	7	11	M767		NA	1.14927	0.357832
c292	M761	LUAD	5	13	M226	PRPF8	REGULATION_OF_POSTTRANSCRIPTIONAL_GENE_SILENCING	0.789199	0.140602
c292	M1038	STAD	6	10	M564	PRPF8	NA	0.975056	0.884532
c293	M773	LUAD	5	14	M227	SMC1A	NA	1.06959	0.670688
c293	M1401	LUSC	6	18	M686	SMC1A	DEMETHYLATION	0.971702	0.852561
c294	M791	LUAD	5	26	M232	C11orf57	NA	1.35236	0.0583744
c294	M123	LUSC	4	39	M21	ARCN1	NA	0.842625	0.268981
c295	M1027	LUSC	6	13	M401	NOP10,TMEM85	NA	0.793068	0.135557
c295	M1337	OV	7	18	M748	TMEM85	NA	0.980872	0.8986
c296	M1081	LUSC	6	54	M420	SSB	NA	0.822789	0.213239
c296	M817	OV	6	35	M500	ZC3H15	NCRNA_METABOLIC_PROCESS	0.881471	0.405778
c297	M1103	LUSC	6	13	M430	RINT1	MRNA_MODIFICATION	0.816565	0.192546
c297	M976	OV	6	10	M550	CBLL1	NA	1.5202	0.00577019
c298	M113	LUSC	4	73	M21	MRPL3	NA	0.87472	0.387791
c298	M891	OV	6	33	M522		NA	0.883927	0.41422
c299	M1250	LUSC	6	14	M517	MAVS	NA	1.17763	0.291699
c299	M1030	OV	6	10	M561	ATRN,MAVS	NA	1.16581	0.308395
c3	M180	BLCA	3	63	M21	CHMP7,CNOT7	NUCLEAR_ENVELOPE_REASSEMBLY	1.14088	0.390564
c3	M737	BLCA	4	26	M180	CHMP7	SNRNA_TRANSCRIPTION	1.29289	0.0958438
c3	M119	BRCA	4	25	M20	CCDC25	RESPONSE_TO_ENDOPLASMIC_RETICULUM_STRESS	0.89384	0.516077
c3	M20	BRCA	3	75	M2	KIAA1967,CCDC25	NEURONAL_STEM_CELL_POPULATION_MAINTENANCE	0.967721	0.849208
c3	M105	CESC	2	55	M3	CNOT7,XPO7,KIAA1967	NEURONAL_STEM_CELL_POPULATION_MAINTENANCE	0.810531	0.420302
c3	M1360	CESC	4	14	M668	KIAA1967	NA	0.609264	0.0634181
c3	M667	CESC	3	35	M105	CNOT7,XPO7	NEURONAL_STEM_CELL_POPULATION_MAINTENANCE	0.997139	0.991277
c3	M668	CESC	3	20	M105	KIAA1967,CHMP7	LATE_ENDOSOME_TO_VACUOLE_TRANSPORT	0.725291	0.220541
c3	M517	ESCA	3	15	M87	INTS9	NEURONAL_STEM_CELL_POPULATION_MAINTENANCE	0.91878	0.763266
c3	M87	ESCA	2	60	M1	XPO7,CHMP7	NEURONAL_STEM_CELL_POPULATION_MAINTENANCE	0.670959	0.162188
c3	M141	HNSC	4	55	M15	CNOT7	NUCLEAR_ENVELOPE_REASSEMBLY	0.775685	0.0690948
c3	M645	HNSC	5	32	M141	CNOT7,XPO7,MCPH1	NEURONAL_STEM_CELL_POPULATION_MAINTENANCE	0.768325	0.0585423
c3	M646	HNSC	5	13	M141	R3HCC1	NA	0.798019	0.106452
c3	M130	KIRC	3	40	M9		NA	0.578189	0.000467279
c3	M110	LIHC	3	81	M10	CHMP7,CNOT7,MCPH1,KIAA1967	NA	1.13914	0.469044
c3	M1219	LIHC	5	17	M555	CHMP7,KIAA1967	NUCLEAR_ENVELOPE_REASSEMBLY	0.92798	0.677888
c3	M555	LIHC	4	35	M110	CHMP7	NA	0.977594	0.899755
c3	M1159	LUAD	6	19	M659	DCTN6,PPP2CB	PEPTIDYL_SERINE_DEPHOSPHORYLATION	0.940061	0.696647
c3	M217	LUAD	4	56	M37	XPO7,DCTN6,CNOT7	NEURONAL_STEM_CELL_POPULATION_MAINTENANCE	0.8952	0.485495
c3	M659	LUAD	5	29	M217	DCTN6,CNOT7	NA	0.962516	0.809537
c3	M160	LUSC	4	30	M23	PPP2R2A	SNRNA_TRANSCRIPTION	0.830395	0.231587
c3	M1160	OV	6	11	M619		NA	0.966466	0.820921
c3	M1816	OV	7	16	M1175	CHMP7	NA	1.0512	0.740647
c3	M619	OV	5	18	M345	GTF2E2	NA	1.02116	0.889681
c3	M477	PAAD	4	22	M111		VIRAL_BUDDING_VIA_HOST_ESCRT_COMPLEX	0.986363	0.948349
c3	M522	PRAD	4	21	M244	TMEM66	NA	0.526112	0.250415
c3	M364	READ	4	15	M41	CHMP7	NA	0.468005	0.112694
c3	M41	READ	3	103	M9	VPS37A,CNOT7,TNKS,CHMP7,PCM1,CCDC25,ELP3	TRAIL_ACTIVATED_APOPTOTIC_SIGNALING_PATHWAY	0.821525	0.670096
c3	M281	SARC	3	27	M19	ELP3	LATE_ENDOSOME_TO_VACUOLE_TRANSPORT	0.926006	0.711207
c3	M71	SKCM	2	83	M3	CNOT7,CHMP7	NUCLEAR_ENVELOPE_REASSEMBLY	0.922856	0.830544
c3	M1095	STAD	6	25	M602	GTF2E2	PEPTIDYL_SERINE_DEPHOSPHORYLATION	0.910239	0.590925
c3	M163	STAD	4	89	M12	XPO7,GTF2E2	DEPHOSPHORYLATION	0.969643	0.859191
c3	M601	STAD	5	58	M163	XPO7	NEURONAL_STEM_CELL_POPULATION_MAINTENANCE	0.723555	0.0647899
c3	M115	UCEC	3	63	M15	VPS37A,CNOT7,CCDC25	NEURONAL_STEM_CELL_POPULATION_MAINTENANCE	1.13194	0.572855
c3	M507	UCEC	4	45	M115	VPS37A,CNOT7	NEURONAL_STEM_CELL_POPULATION_MAINTENANCE	1.36784	0.157518
c30	M361	BLCA	5	15	M93	HOXC6,HOXC8	REGIONALIZATION	1.14181	0.386656
c30	M403	BRCA	5	11	M70	HOXC10,HOXC11	NA	0.980144	0.907329
c30	M153	COAD	4	10	M18	HOXC6	NA	1.89034	0.00973388
c30	M34	GBM	3	27	M4		ANTERIOR_POSTERIOR_PATTERN_SPECIFICATION	1.62703	0.0127642
c30	M213	HNSC	4	12	M21		REGIONALIZATION	1.25489	0.102134
c30	M177	KICH	4	10	M20	HOXC10	NA	1.38145	0.630324
c30	M105	LGG	4	17	M9	HOXC10	REGIONALIZATION	1.72232	0.000274103
c30	M1172	LUAD	6	12	M668		NA	1.42153	0.0277973
c30	M668	LUAD	5	31	M219		ANTERIOR_POSTERIOR_PATTERN_SPECIFICATION	1.28865	0.110766
c30	M154	LUSC	4	11	M23	HOXC5	NA	1.34419	0.0580581
c30	M43	OV	4	27	M6		EMBRYONIC_SKELETAL_SYSTEM_DEVELOPMENT	1.35915	0.0435166
c30	M32	PAAD	4	13	M5		ANTERIOR_POSTERIOR_PATTERN_SPECIFICATION	1.19777	0.395876
c30	M387	SARC	3	14	M34	HOXC6	NA	1.09037	0.677835
c30	M140	SKCM	2	18	M3	HOXB7	ANTERIOR_POSTERIOR_PATTERN_SPECIFICATION	1.47322	0.31431
c30	M99	UCEC	5	11	M12		NA	1.21192	0.383153
c30	M1683	UCS	6	14	M1196		NA	0.714879	0.329014
c300	M126	LUSC	4	69	M22	VPS26A,DDX50	DICARBOXYLIC_ACID_BIOSYNTHETIC_PROCESS	1.13573	0.411829
c300	M593	OV	5	46	M344	MRPS16	INTRASPECIES_INTERACTION_BETWEEN_ORGANISMS	0.86228	0.326438
c301	M1372	LUSC	6	15	M673	ZNF408	NA	1.30412	0.0886008
c301	M892	OV	6	14	M522	AMBRA1	POSITIVE_REGULATION_OF_LIPID_KINASE_ACTIVITY	1.07462	0.632503
c302	M1472	LUSC	6	15	M732	COPS4	NA	0.802984	0.158014
c302	M1089	OV	6	19	M590	COPS4,HELQ	NA	0.971578	0.848571
c303	M1772	LUSC	7	11	M1210	TADA1	NA	1.00299	0.984733
c303	M1631	OV	7	12	M928	TIPRL	NA	0.875646	0.38245
c304	M178	LUSC	4	43	M24	C1orf50,ERI3,EBNA1BP2	ELECTRON_TRANSPORT_CHAIN	0.976534	0.87762
c304	M979	OV	6	56	M552	PPIH,ERI3,EBNA1BP2,EIF2B3	NA	0.949996	0.733968
c305	M203	LUSC	4	11	M25		NA	0.859242	0.325658
c305	M989	OV	6	12	M553		NA	0.899964	0.487115
c306	M225	LUSC	4	29	M25	INO80E	NA	0.988904	0.94228
c306	M279	STAD	5	29	M32	PPP4C	NA	0.834593	0.303424
c307	M236	LUSC	4	12	M27	TCEAL8	NA	0.807993	0.167065
c307	M210	STAD	5	14	M16	NGFRAP1	NA	1.70495	0.00274975
c308	M483	LUSC	5	27	M121	C11orf58	NA	1.06373	0.689203
c308	M799	OV	6	31	M496		NA	0.847641	0.274519
c309	M484	LUSC	5	14	M121	NUP98	NA	1.31029	0.0805707
c309	M800	OV	6	27	M496	NUP98,SBF2	NA	1.15635	0.334738
c31	M380	BLCA	4	12	M112	CTAGE9,LOC441294	NA	1.18646	0.265593
c31	M484	BRCA	4	12	M120	LOC441294	NA	0.929468	0.672071
c31	M341	CESC	3	10	M11		NA	1.24545	0.402325
c31	M546	DLBC	3	12	M81	ARHGEF35	NA	1.03527	0.956366
c31	M118	ESCA	3	10	M8	LOC441294	NA	0.94622	0.846327
c31	M430	KIRC	4	10	M101	LOC441294,CTAGE9	NA	1.18391	0.268434
c31	M202	LIHC	4	13	M20	CTAGE9	NA	0.986256	0.938808
c31	M64	LUAD	4	11	M7	LOC441294	NA	0.873876	0.39562
c31	M41	LUSC	4	13	M9	LOC441294	NA	1.08253	0.606829
c31	M595	OV	5	10	M345	CTAGE9,LOC441294	NA	0.8584	0.310901
c31	M151	PCPG	3	12	M11		NA	0.671676	0.383541
c31	M899	SARC	4	12	M303	ARHGEF5,ARHGEF35	NA	0.674919	0.0603509
c31	M164	SKCM	4	17	M4		VESICLE_CARGO_LOADING	1.34443	0.429497
c31	M740	SKCM	5	11	M164	LOC441294	NA	2.5195	0.0190743
c31	M264	THCA	5	10	M36	CTAGE9,LOC441294	NA	0.929103	0.803334
c31	M305	UVM	3	11	M38	OR2A9P	NA	0.425433	0.110745
c310	M509	LUSC	5	26	M127	KDM5A	NA	0.955464	0.767467
c310	M1083	OV	6	41	M587	ZNF384	SENSORY_PERCEPTION_OF_BITTER_TASTE	0.99469	0.971821
c311	M598	LUSC	5	15	M155	HDAC10,LMF2,TRABD	NA	0.963184	0.811005
c311	M200	UCS	3	11	M14	SELO	NA	0.947162	0.878172
c312	M696	LUSC	5	29	M197	WIZ	REGULATION_OF_HISTONE_PHOSPHORYLATION	1.04569	0.773061
c312	M242	UCEC	3	26	M26	CHERP,WIZ	HISTONE_DEACETYLATION	1.28679	0.257118
c313	M48	MESO	2	12	M2	C9orf82	NA	0.328866	2.32701e-05
c313	M272	SARC	3	14	M19		NA	1.09512	0.662244
c314	M713	MESO	3	19	M149	ACAD9,NDUFB4	NUCLEOBASE_CONTAINING_SMALL_MOLECULE_BIOSYNTHETIC_PROCESS	0.768926	0.283651
c314	M1497	SARC	5	15	M1069	C3orf37,ACAD9	NA	0.958297	0.837364
c315	M1527	OV	7	11	M860	ANAPC11	NA	0.675905	0.00983488
c315	M955	STAD	6	11	M436	ANAPC11	NA	1.09667	0.596137
c316	M1530	OV	7	17	M862	GPKOW	NA	1.08933	0.570818
c316	M865	UCS	4	30	M280	CCDC22	NA	0.928384	0.828254
c317	M1641	OV	7	11	M934	C10orf84,GLRX3	NA	0.961822	0.795997
c317	M301	STAD	5	14	M38	BCCIP	TRANSITION_METAL_ION_HOMEOSTASIS	1.04841	0.785435
c318	M1755	OV	7	18	M1048	C19orf43	NA	0.803858	0.149992
c318	M352	UCS	3	23	M47	C19orf43,C19orf56	NA	2.66172	0.0102705
c319	M1947	OV	8	10	M1384	ZNF526,ZNF574	NA	0.951308	0.740818
c319	M442	STAD	5	10	M100		NA	0.921781	0.640445
c32	M1545	BLCA	5	11	M882	VAPA	NA	1.11992	0.46018
c32	M231	BLCA	3	23	M23	VAPA	CENTROSOME_DUPLICATION	0.945775	0.715701
c32	M882	BLCA	4	16	M231	VAPA	NA	0.85122	0.294447
c32	M240	BRCA	3	20	M22	VAPA	NA	0.780049	0.150862
c32	M103	ESCA	3	18	M5		NA	0.70195	0.222236
c32	M139	HNSC	4	22	M15	VAPA	NA	1.61153	0.00070345
c32	M79	LUAD	4	15	M9	CHMP1B,NDUFV2,VAPA	GOLGI_VESICLE_TRANSPORT	1.22668	0.20266
c32	M1110	LUSC	6	10	M434	SEH1L	NA	0.951912	0.751099
c32	M434	LUSC	5	25	M104		CENTROSOME_DUPLICATION	0.906567	0.528216
c32	M1086	OV	6	21	M589	SEH1L,VAPA	CENTROSOME_DUPLICATION	0.819751	0.190086
c32	M1774	OV	7	11	M1086	VAPA	NA	0.956046	0.765241
c32	M589	OV	5	37	M343		NA	0.975628	0.870093
c32	M687	READ	4	12	M159	VAPA	GOLGI_VESICLE_TRANSPORT	1.03009	0.949
c32	M101	STAD	4	23	M10	CEP76	CENTROSOME_DUPLICATION	1.24533	0.206601
c32	M444	STAD	5	17	M101	CEP76	NA	1.04365	0.805628
c320	M485	OV	5	52	M326		CELLULAR_RESPONSE_TO_NITROGEN_STARVATION	0.924347	0.603899
c320	M77	SARC	3	46	M3	NUTF2	NA	1.03651	0.863129
c321	M542	OV	5	44	M327	STK11,CSNK1G2	NA	0.931452	0.638244
c321	M83	SARC	3	29	M3		NA	0.95114	0.809561
c322	M614	OV	5	39	M345	TRAPPC10,PFKL	NA	1.2198	0.189243
c322	M277	STAD	5	19	M31	PWP2	NA	0.945474	0.747811
c323	M785	OV	6	22	M492		NA	0.958984	0.782343
c323	M353	READ	4	20	M38		NA	0.424377	0.101767
c324	M802	OV	6	11	M497	ZGPAT	NA	0.836409	0.238852
c324	M343	STAD	5	12	M51	GTPBP5	NA	0.926063	0.658777
c325	M38	COAD	4	11	M8	IGF2	NA	1.03505	0.88562
c325	M348	READ	4	10	M38	IGF2	NA	0.807888	0.647007
c326	M455	READ	4	13	M59	ZNF20	NA	0.814804	0.659674
c326	M155	STAD	4	10	M11	ZNF709	NA	0.994877	0.976612
c327	M284	COAD	5	14	M60	PWP2,C21orf70	NA	1.0607	0.809557
c327	M803	READ	4	11	M209	RRP1	NA	1.15452	0.757901
c328	M197	SARC	3	15	M7	IKZF5,FAM175B	NA	1.16455	0.464414
c328	M595	STAD	5	11	M162	IKZF5,ZRANB1	NA	1.5182	0.018127
c329	M1180	THCA	6	118	M916	RPL32,RPS20,RPL11,RPS11,RPL8,RPS8	COTRANSLATIONAL_PROTEIN_TARGETING_TO_MEMBRANE	0.895013	0.707198
c329	M52	THYM	3	159	M5	RPL18,RPL32,RPS16,RPS9,RPL35,RPL37A,RPL18A,RPS8,FAU,RPS11,RPS19	COTRANSLATIONAL_PROTEIN_TARGETING_TO_MEMBRANE	0.797912	0.609599
c33	M167	BLCA	3	42	M21	FAM3A,FAM58A	NA	1.01297	0.933012
c33	M693	BLCA	4	27	M167	FAM3A	POSITIVE_REGULATION_OF_FERTILIZATION	0.935863	0.665627
c33	M134	CESC	2	36	M3	EMD	NA	0.560827	0.0287873
c33	M198	ESCA	3	27	M24	EMD	NA	1.86118	0.0297969
c33	M101	HNSC	4	42	M15	FAM3A,EMD	NA	1.37477	0.0226856
c33	M1176	HNSC	6	14	M520	FAM3A	NA	1.11817	0.421542
c33	M520	HNSC	5	33	M101	FAM3A,EMD	SEMAPHORIN_PLEXIN_SIGNALING_PATHWAY_INVOLVED_IN_NEURON_PROJECTION_GUIDANCE	1.3737	0.0229581
c33	M466	LIHC	4	32	M80	EMD,NAA10	NA	1.26846	0.190388
c33	M80	LIHC	3	39	M10	EMD,NAA10	NA	1.35959	0.0920326
c33	M274	LUAD	5	36	M66	IDH3G,NAA10,FAM58A	NA	1.15635	0.359976
c33	M412	LUSC	5	23	M98	EMD,FAM3A	NA	0.742112	0.0544477
c33	M1520	OV	7	23	M856	BCAP31	NA	0.930795	0.634797
c33	M856	OV	6	66	M511	BCAP31,NSDHL,VBP1	NA	1.06188	0.690562
c33	M167	SARC	3	36	M7	FAM3A	NA	1.01171	0.955288
c33	M99	STAD	4	33	M10	UBL4A,IDH3G	NA	0.836366	0.304616
c330	M409	THYM	4	16	M76	TRIM49L,PRAMEF12	NA	1.79705	0.207044
c330	M260	UCS	3	21	M23	TRIM49L	NA	1.36115	0.389875
c34	M405	BRCA	5	36	M71	ZFP36	FAT_CELL_DIFFERENTIATION	0.829585	0.278485
c34	M250	CESC	3	24	M5	ZFP36,FOSB	SKELETAL_MUSCLE_CELL_DIFFERENTIATION	1.12969	0.636906
c34	M489	ESCA	3	24	M79	ZFP36,DUSP1	RESPONSE_TO_RADIATION	2.23161	0.00807717
c34	M79	ESCA	2	36	M1	ZFP36	RESPONSE_TO_OXIDATIVE_STRESS	2.13666	0.0119988
c34	M85	GBM	4	35	M5	ZFP36	RESPONSE_TO_STEROID_HORMONE	1.179	0.390757
c34	M514	KIRP	5	24	M83	FOS	RESPONSE_TO_ORGANOPHOSPHORUS	1.08411	0.791573
c34	M326	LUSC	5	42	M33	CSRNP1	RESPONSE_TO_STEROID_HORMONE	1.38415	0.0386229
c34	M987	LUSC	6	16	M326		SKELETAL_MUSCLE_CELL_DIFFERENTIATION	1.28036	0.117906
c34	M306	PAAD	4	17	M76		RESPONSE_TO_STEROID_HORMONE	1.18053	0.437882
c34	M76	PAAD	3	31	M10	PPP1R15A	REGULATION_OF_DNA_TEMPLATED_TRANSCRIPTION_IN_RESPONSE_TO_STRESS	1.30789	0.2084
c34	M264	READ	5	26	M19	NR4A1	RESPONSE_TO_RADIATION	0.812106	0.643502
c34	M102	SARC	3	26	M4	FOS	RESPONSE_TO_STEROID_HORMONE	1.03083	0.883679
c34	M222	STAD	5	36	M17	EGR1,ZFP36,CSRNP1	SKELETAL_MUSCLE_CELL_DIFFERENTIATION	1.54283	0.0137963
c34	M434	UCEC	6	37	M90	FOSB,FOS,ZFP36	CHAPERONE_COFACTOR_DEPENDENT_PROTEIN_REFOLDING	0.834698	0.411484
c34	M971	UCEC	7	29	M434	FOSB,FOS,ZFP36,DUSP1	RESPONSE_TO_STEROID_HORMONE	0.930425	0.743141
c35	M1232	BLCA	5	14	M533	NEDD8,MRPL52	PROTEIN_TARGETING	1.33802	0.0593628
c35	M1201	CESC	4	12	M450	MRPL52	NA	0.930124	0.780039
c35	M1357	ESCA	4	10	M514	PARP2	NA	0.994492	0.984637
c35	M514	ESCA	3	30	M86	NGDN	REGULATION_OF_MRNA_CATABOLIC_PROCESS	1.3088	0.338654
c35	M86	ESCA	2	54	M1	NGDN	REGULATION_OF_MRNA_CATABOLIC_PROCESS	1.10371	0.727201
c35	M984	HNSC	6	18	M391	APEX1,NGDN	DNA_MODIFICATION	1.23026	0.135468
c35	M313	KIRP	3	19	M49	NEDD8	PROTEASOMAL_UBIQUITIN_INDEPENDENT_PROTEIN_CATABOLIC_PROCESS	0.850537	0.596151
c35	M161	LUAD	4	33	M22	NEDD8,APEX1	NA	1.05013	0.759451
c35	M192	LUSC	4	33	M25	NEDD8	NA	0.919434	0.591356
c35	M682	LUSC	5	20	M192	NEDD8	PURINE_CONTAINING_COMPOUND_SALVAGE	0.875435	0.393384
c35	M285	OV	5	26	M120	NEDD8	REGULATION_OF_MRNA_CATABOLIC_PROCESS	0.990223	0.948155
c35	M1035	SARC	4	22	M365	NEDD8	PROTEASOMAL_UBIQUITIN_INDEPENDENT_PROTEIN_CATABOLIC_PROCESS	0.8383	0.397919
c35	M996	SKCM	4	18	M336	NEDD8,PSMB5	NA	0.583713	0.163199
c35	M113	STAD	4	12	M10	NGDN	NA	1.16003	0.393576
c36	M154	BLCA	3	88	M21	ZNHIT1,PRKRIP1,POLR2J,PDAP1,BUD31	NA	0.94242	0.698416
c36	M65	CESC	2	96	M3	ZNHIT1,CPSF4,PDAP1,BUD31	NA	0.916032	0.735147
c36	M270	ESCA	3	59	M37	POP7,TAF6	NA	0.781123	0.389351
c36	M37	ESCA	2	101	M1		TRNA_PROCESSING	0.919757	0.769757
c36	M952	ESCA	4	30	M270	TAF6	NA	0.773979	0.363667
c36	M121	HNSC	4	56	M15	BUD31	NA	1.18381	0.223828
c36	M103	LUSC	4	136	M21	POLR2J,COPS6,PMS2L1,RINT1	TRNA_PROCESSING	0.896393	0.479214
c36	M429	LUSC	5	67	M103	POLR2J,COPS6	LIPOXYGENASE_PATHWAY	0.937669	0.676588
c36	M1622	OV	7	55	M923	POP7,C7orf59,COPS6,ZNHIT1,BUD31	NA	0.885112	0.418579
c36	M923	OV	6	68	M532	POP7,C7orf59,COPS6,ZNHIT1,BUD31	NA	0.869343	0.353599
c36	M1060	PAAD	5	31	M519	ZNHIT1	NA	0.856794	0.46646
c36	M112	SARC	3	80	M7	ZNHIT1,BUD31,ATP5J2,POLR2J	NA	0.740666	0.15159
c36	M324	STAD	5	34	M44	BUD31,COPS6	NA	1.08045	0.65609
c36	M44	STAD	4	48	M9	BUD31,COPS6	NA	0.938393	0.714711
c37	M500	BLCA	4	18	M122	ZNF24	NA	1.08358	0.600592
c37	M784	BRCA	4	43	M226	C18orf25,VPS4B	SECONDARY_PALATE_DEVELOPMENT	1.13378	0.468543
c37	M392	ESCA	3	16	M59	ZNF24	NA	0.696786	0.202142
c37	M59	ESCA	2	47	M1	ZNF24,SMAD2,PIK3C3	NA	0.875465	0.635415
c37	M168	HNSC	4	20	M15	ZNF24	NA	0.899183	0.446095
c37	M34	LUAD	3	58	M2	KIAA1012,SMAD4	SECONDARY_PALATE_DEVELOPMENT	0.803523	0.170697
c37	M1169	LUSC	6	18	M475	ZNF24	NA	0.978455	0.887498
c37	M117	LUSC	4	59	M21	ZNF24	NA	0.87584	0.390812
c37	M475	LUSC	5	22	M117	ZNF24,ZNF271,ELP2	NA	0.954631	0.76312
c37	M984	OV	6	42	M553		NA	0.863669	0.330603
c37	M985	OV	6	25	M553	ZNF271,ZNF24	CORNIFICATION	0.743761	0.0500567
c37	M204	READ	3	75	M15	ZNF24,C18orf25	NA	1.50159	0.382136
c37	M568	STAD	5	25	M161	ZNF24	NA	1.26907	0.174745
c38	M455	ACC	4	27	M90	CAND1	NA	0.990782	0.981297
c38	M170	BLCA	3	13	M21	FRS2	NA	1.09469	0.556038
c38	M248	BRCA	3	15	M22	CNOT2,YEATS4	CHAPERONE_MEDIATED_PROTEIN_COMPLEX_ASSEMBLY	0.806601	0.212911
c38	M280	ESCA	3	29	M38	FRS2	NA	1.75652	0.0537648
c38	M966	ESCA	4	17	M280	FRS2	NA	1.54843	0.128258
c38	M385	LUAD	5	15	M98	CNOT2,CAND1	NA	1.3248	0.0772247
c38	M98	LUAD	4	20	M13	CAND1,CNOT2	NA	1.31268	0.0876279
c38	M275	LUSC	5	18	M30	CCT2	NA	0.854518	0.314799
c38	M1260	OV	6	10	M661	CCT2,RAP1B	NA	1.12507	0.435711
c38	M661	OV	5	30	M346	CAND1,NUP107	NA	1.09379	0.553663
c38	M485	PAAD	4	16	M111	FRS2	NA	1.36242	0.145355
c38	M92	TGCT	3	16	M2	CNOT2	NA	0.818424	0.560461
c39	M561	BLCA	4	27	M134	KRIT1	NA	1.02859	0.85415
c39	M203	BRCA	3	21	M22	KRIT1	NA	1.01315	0.93975
c39	M737	BRCA	4	14	M203	KRIT1	NA	0.898033	0.532669
c39	M271	ESCA	3	29	M37	C7orf64	LIPOXYGENASE_PATHWAY	0.838509	0.536204
c39	M118	GBM	3	14	M7	C7orf64,PEX1	NA	1.36348	0.11205
c39	M683	HNSC	5	14	M157	MTERF,C7orf64	NA	1.00576	0.966934
c39	M427	LIHC	4	19	M68	KRIT1,CCDC132	NA	1.02486	0.892561
c39	M276	LUAD	5	13	M67	C7orf64	NA	1.00326	0.983617
c39	M427	LUSC	5	14	M103	KRIT1,C7orf64	NA	0.766003	0.085266
c39	M624	OV	5	22	M345	KRIT1	NA	1.18319	0.266006
c39	M963	PAAD	5	11	M474		NA	0.920811	0.700132
c39	M616	SARC	4	15	M143	KRIT1,PEX1	NA	1.04023	0.849885
c4	M1248	BLCA	5	14	M553	ZNF28,ZNF813	NA	0.920449	0.588438
c4	M131	BLCA	3	60	M21		NA	0.873627	0.377678
c4	M553	BLCA	4	26	M131		NA	0.829988	0.224354
c4	M554	BLCA	4	14	M131		NA	0.65516	0.006429
c4	M162	BRCA	3	25	M22	ZNF845	NA	1.02531	0.885068
c4	M643	BRCA	4	10	M162	ZNF701	NA	1.07258	0.685488
c4	M1055	CESC	5	47	M318	ZNF91	DNA_INTEGRATION	1.22666	0.43244
c4	M1566	CESC	6	23	M1055		NA	1.06475	0.808866
c4	M357	CHOL	3	25	M52	ZNF845	NA	0.748326	0.542257
c4	M242	ESCA	3	17	M31	ZNF808,ZNF701	NA	1.07422	0.801362
c4	M1288	GBM	5	12	M711	ZNF320	NA	1.10546	0.600396
c4	M106	HNSC	4	43	M15		NA	0.861202	0.283422
c4	M1192	HNSC	6	11	M536	ZNF468	NA	0.990046	0.942535
c4	M536	HNSC	5	23	M106	ZNF468	NA	0.999968	0.999817
c4	M71	LGG	3	98	M6	ZNF304,ZNF776,ZIK1	NA	1.76925	0.000143711
c4	M1228	LUAD	6	11	M685	ZNF611	NA	0.870921	0.387001
c4	M685	LUAD	5	25	M221	ZNF611	NA	1.07546	0.645875
c4	M1416	LUSC	6	13	M690	ZNF816A	NA	1.15407	0.354143
c4	M195	LUSC	4	62	M25		NA	1.21923	0.201762
c4	M690	LUSC	5	41	M195		NA	1.12683	0.440501
c4	M104	MESO	2	83	M2	ZNF223,ZNF225	NA	1.08584	0.737179
c4	M1249	MESO	4	12	M609	ZNF320	NA	0.895243	0.651486
c4	M1138	OV	6	13	M611		NA	1.19127	0.246567
c4	M611	OV	5	35	M345		NA	1.13815	0.39151
c4	M439	PAAD	4	16	M111		NA	0.870384	0.511116
c4	M539	STAD	5	20	M159	ZNF160	NA	1.21378	0.266626
c4	M1184	UCEC	5	12	M766		NA	1.1022	0.65801
c4	M766	UCEC	4	17	M256		NA	0.94739	0.805842
c4	M11	UCS	2	67	M2	ZNF28,ZNF816A	DNA_INTEGRATION	1.5631	0.204049
c4	M173	UCS	3	40	M11	ZNF28,ZNF816A	NA	1.22964	0.548893
c4	M702	UCS	4	11	M173		NA	1.81853	0.0928872
c40	M602	BLCA	4	12	M143	MRE11A	NA	0.913646	0.555481
c40	M673	BRCA	4	14	M177	MRE11A	NA	1.07465	0.677313
c40	M46	CESC	2	24	M3		NA	0.850233	0.531054
c40	M359	ESCA	3	21	M51	ANKRD49,FAM76B	NA	0.962969	0.893187
c40	M590	HNSC	5	14	M123	MRE11A	NA	0.945467	0.6866
c40	M1602	MESO	5	14	M1222	MRE11A,FAM76B	NA	0.974739	0.917616
c40	M1436	OV	7	28	M787	CEP57,FAM76B	NA	1.06869	0.659668
c40	M1997	OV	8	18	M1436	FAM76B	NA	1.14559	0.366539
c40	M1362	SARC	5	12	M822	MRE11A	NA	1.23474	0.313131
c40	M822	SARC	4	17	M276	MRE11A,FAM76B,JRKL	NA	1.2962	0.214501
c40	M1534	SKCM	5	12	M1135	CCDC82	NA	2.8272	0.0146632
c40	M146	STAD	4	18	M11	FAM76B	NA	0.996097	0.982131
c41	M873	BRCA	4	12	M266	ZNF7	NA	0.827125	0.27231
c41	M175	CESC	2	17	M3		NA	0.989481	0.967592
c41	M1059	ESCA	4	16	M342	ZNF7	NA	0.960999	0.887404
c41	M256	HNSC	4	15	M32	ZNF517	NA	0.985879	0.918731
c41	M826	LGG	5	10	M306		NA	0.797362	0.121546
c41	M236	LIHC	4	23	M25	SCRIB,ZNF7,ZNF696	RNA_POLYADENYLATION	1.13769	0.475945
c41	M184	LUAD	4	18	M28	LRRC14	NA	1.00911	0.954378
c41	M574	LUSC	5	25	M141		NA	1.25916	0.139846
c41	M559	PAAD	4	17	M112	LRRC14	NA	0.49038	0.00104387
c41	M87	SARC	3	17	M3	ZNF517,ZNF7	NA	0.912022	0.657515
c41	M67	STAD	4	21	M9	ZNF696	NA	1.08695	0.631452
c41	M168	UCS	3	19	M9	ZNF7,ZNF16	NA	1.72014	0.115994
c42	M631	ACC	4	19	M134	SOD1,ATP5J	NA	0.837756	0.654388
c42	M569	BRCA	4	12	M138	ATP5J,ATP5O	NA	1.00231	0.989302
c42	M996	HNSC	6	15	M394	ATP5J	TRANSLATIONAL_TERMINATION	1.17272	0.252835
c42	M570	KIRP	4	14	M107	ATP5J	NA	0.638103	0.14618
c42	M12	LUAD	3	14	M2	CRYZL1	NA	0.838908	0.267658
c42	M1078	LUSC	6	23	M419	ATP5O	NA	0.943333	0.707792
c42	M430	MESO	3	12	M46		NA	1.04262	0.865128
c42	M1183	PCPG	5	16	M527	SOD1	NA	2.29212	0.0902168
c42	M527	PCPG	4	20	M114	SOD1,ATP5J	NA	1.48164	0.390495
c42	M1495	SARC	5	11	M1068	ATP5J	NA	0.85667	0.456657
c42	M245	STAD	5	12	M22		NA	1.37916	0.0652288
c43	M174	BLCA	3	64	M21	MRPS24	MISMATCH_REPAIR	1.16181	0.327522
c43	M715	BLCA	4	53	M174	MRPS24	PROTEIN_PEPTIDYL_PROLYL_ISOMERIZATION	1.073	0.645167
c43	M214	BRCA	3	49	M22	MRPS24	PROTEIN_PEPTIDYL_PROLYL_ISOMERIZATION	1.22769	0.23564
c43	M756	BRCA	4	33	M214	MRPS24	MITOCHONDRIAL_GENE_EXPRESSION	1.1789	0.340824
c43	M60	ESCA	2	61	M1	EIF3B	MITOCHONDRIAL_GENE_EXPRESSION	0.741191	0.294612
c43	M165	LUAD	4	44	M23	PPIA,LSM5	MITOCHONDRIAL_GENE_EXPRESSION	1.40305	0.0348266
c43	M23	LUAD	3	118	M2	PPIA,LSM5	EMBRYONIC_SKELETAL_SYSTEM_DEVELOPMENT	1.57915	0.00465797
c43	M107	LUSC	4	91	M21	PSMA2,PPIA	PROTEIN_PEPTIDYL_PROLYL_ISOMERIZATION	0.871191	0.373524
c43	M1130	LUSC	6	39	M443	PSMA2,PPIA,LSM5	PROTEIN_PEPTIDYL_PROLYL_ISOMERIZATION	0.773232	0.101124
c43	M443	LUSC	5	56	M107	PSMA2,PPIA	PROTEIN_PEPTIDYL_PROLYL_ISOMERIZATION	0.780733	0.114298
c43	M523	OV	5	80	M327	PSMA2	NA	0.99808	0.989812
c44	M1043	CESC	5	16	M316	HBD	OXYGEN_TRANSPORT	1.58582	0.0767737
c44	M428	GBM	5	14	M80	HBA2,HBB	OXYGEN_TRANSPORT	1.05714	0.772403
c44	M80	GBM	4	22	M5		OXYGEN_TRANSPORT	0.896383	0.571779
c44	M355	KIRC	4	28	M77	EPB42	GAS_TRANSPORT	0.913442	0.55326
c44	M108	LGG	4	16	M10	HBD,HBA2,ALAS2	OXYGEN_TRANSPORT	0.962065	0.790591
c44	M220	LIHC	4	15	M23	HBD	ERYTHROCYTE_HOMEOSTASIS	0.892868	0.531877
c44	M23	LIHC	3	20	M6	HBD,ALAS2	OXYGEN_TRANSPORT	0.972736	0.878535
c44	M254	PCPG	5	25	M22	HBM	GAS_TRANSPORT	1.17119	0.725995
c44	M878	PCPG	6	20	M254	HBM	GAS_TRANSPORT	0.870089	0.756701
c44	M130	SARC	3	12	M7	HBD	OXYGEN_TRANSPORT	0.949957	0.804841
c44	M665	THYM	4	11	M160		OXYGEN_TRANSPORT	1.64383	0.266114
c45	M1068	CESC	5	15	M323	MT2A	STRESS_RESPONSE_TO_METAL_ION	1.52485	0.107339
c45	M106	CHOL	3	14	M4	MT2A	STRESS_RESPONSE_TO_METAL_ION	1.17581	0.735324
c45	M372	KIRC	4	11	M80	MT1E	NA	1.54051	0.00498411
c45	M716	LGG	5	11	M219	MT1M,MT1E	NA	1.42048	0.017213
c45	M451	LIHC	4	11	M76		NA	0.853192	0.378604
c45	M603	LUAD	5	12	M210	MT1X,MT2A	STRESS_RESPONSE_TO_METAL_ION	1.19797	0.257002
c45	M184	LUSC	4	10	M24	MT1M	NA	1.25439	0.141504
c45	M1023	SARC	4	16	M363		STRESS_RESPONSE_TO_METAL_ION	0.708117	0.100662
c45	M152	SKCM	2	16	M3	MT1M	STRESS_RESPONSE_TO_METAL_ION	1.24183	0.572236
c45	M207	THCA	5	12	M30	MT1G	NA	0.653908	0.159909
c45	M306	UCEC	3	10	M34	MT1M	NA	1.28092	0.263913
c46	M96	CESC	2	23	M3	POLR2B,PPAT	IMP_BIOSYNTHETIC_PROCESS	1.20449	0.472509
c46	M1290	ESCA	4	12	M473	SRP72	NA	0.866877	0.611778
c46	M473	ESCA	3	26	M75	SRP72,POLR2B,NUP54	NUCLEOSIDE_MONOPHOSPHATE_BIOSYNTHETIC_PROCESS	0.861165	0.598513
c46	M207	LUSC	4	59	M25		PROTEIN_CONTAINING_COMPLEX_LOCALIZATION	1.13092	0.429259
c46	M731	LUSC	5	21	M207		IMP_BIOSYNTHETIC_PROCESS	0.896082	0.479317
c46	M1053	OV	6	17	M571	POLR2B	IMP_BIOSYNTHETIC_PROCESS	0.903743	0.501819
c46	M335	OV	4	53	M143		PROTEIN_CONTAINING_COMPLEX_LOCALIZATION	0.848386	0.274728
c46	M571	OV	5	27	M335	POLR2B	IMP_BIOSYNTHETIC_PROCESS	0.958359	0.778079
c46	M1210	READ	5	11	M487	POLR2B,AASDH	NA	0.26065	0.0163259
c46	M244	SARC	3	18	M9	SRP72,PPAT	IMP_BIOSYNTHETIC_PROCESS	2.02566	0.00102635
c46	M112	TGCT	3	13	M4	SRP72,POLR2B	NA	0.842918	0.619515
c47	M1396	BLCA	5	12	M703	SNX6,SCFD1	NA	1.34806	0.0529021
c47	M703	BLCA	4	16	M171	SNX6	REGULATION_OF_EPIDERMAL_GROWTH_FACTOR_ACTIVATED_RECEPTOR_ACTIVITY	1.26971	0.119901
c47	M1241	BRCA	5	11	M647	STRN3,SRP54	NA	0.995195	0.977698
c47	M647	BRCA	4	15	M163		NA	1.02776	0.873744
c47	M185	GBM	3	15	M8		COPII_COATED_VESICLE_BUDDING	0.777709	0.198914
c47	M638	HNSC	5	11	M138	KIAA0391	NA	1.41732	0.012516
c47	M103	LUAD	4	31	M13		COPII_COATED_VESICLE_BUDDING	1.04054	0.803364
c47	M396	LUAD	5	19	M103	KIAA0391	NA	1.15239	0.373446
c47	M440	LUSC	5	14	M106	SCFD1	NA	0.869236	0.365018
c47	M286	OV	5	14	M120		NA	1.06009	0.698096
c48	M435	BLCA	4	13	M117	ZNF568	NA	0.804557	0.15591
c48	M1054	CESC	5	18	M318		NA	1.03859	0.883503
c48	M840	ESCA	4	16	M206	ZNF570	NA	1.09398	0.749387
c48	M1195	HNSC	6	10	M540	ZNF569,ZNF420	NA	0.852655	0.251526
c48	M540	HNSC	5	24	M109	ZNF420,ZNF568,ZNF569	NA	0.804665	0.118755
c48	M1148	KIRC	5	10	M527	ZNF568	NA	0.552993	0.000180254
c48	M177	LUAD	4	18	M27	ZNF568	NA	0.799039	0.160377
c48	M534	LUAD	5	13	M177	ZNF568	NA	0.830029	0.242247
c48	M1165	STAD	7	11	M707	ZNF568	NA	1.92578	0.000263649
c48	M288	UCEC	3	12	M31	ZNF585A	NA	1.26209	0.29253
c49	M622	BLCA	4	32	M144	MTMR14,C3orf10	RNA_MODIFICATION	0.851466	0.295285
c49	M1311	BRCA	5	15	M741	ARPC4	NA	0.933296	0.69153
c49	M663	CESC	3	18	M104	MTMR14	NA	0.839016	0.50098
c49	M463	ESCA	3	15	M73	MTMR14	NA	0.961094	0.888603
c49	M1269	HNSC	6	16	M602	ARPC4	NA	0.830623	0.182528
c49	M469	LUAD	5	15	M145	ARPC4	NA	0.96403	0.818488
c49	M1057	LUSC	6	18	M411	ARPC4	NA	1.12443	0.448417
c49	M411	LUSC	5	25	M98	ARPC4	NA	1.2049	0.228942
c49	M752	OV	6	24	M481	C3orf10	NA	0.988665	0.940048
c49	M825	STAD	6	10	M268	TADA3,C3orf10	NA	1.02436	0.890212
c5	M156	BLCA	3	29	M21	SNORA48	NA	0.763245	0.0786509
c5	M1180	BRCA	5	14	M572	SNORD15B	NA	1.09107	0.613865
c5	M139	BRCA	3	33	M21	SNORD15B	NA	0.79991	0.199584
c5	M571	BRCA	4	14	M139	SCARNA10	NA	0.792767	0.18041
c5	M572	BRCA	4	19	M139	SNORA48,SNORD15B	NA	1.03905	0.824627
c5	M639	CESC	3	15	M95		REGULATION_OF_GENE_SILENCING	0.761324	0.295557
c5	M640	CESC	3	26	M95	SNORA48	NA	0.735329	0.239797
c5	M95	CESC	2	41	M3	SNORA48	NEGATIVE_REGULATION_OF_MEGAKARYOCYTE_DIFFERENTIATION	0.693453	0.160813
c5	M282	COAD	5	19	M60	SNORA63	NA	1.33115	0.24238
c5	M543	COAD	6	13	M282	SNORA63,SNORA68	NA	1.13478	0.600089
c5	M1613	GBM	6	14	M1262	SNORD15B,SNORA48	NA	0.767097	0.168994
c5	M377	HNSC	5	17	M78	RPPH1	NA	1.28077	0.074847
c5	M1045	KIRC	5	17	M433	RPPH1,RMRP	NEGATIVE_REGULATION_OF_MEGAKARYOCYTE_DIFFERENTIATION	1.9079	4.74409e-05
c5	M433	KIRC	4	27	M101	SNORA57,RPPH1	NEGATIVE_REGULATION_OF_MEGAKARYOCYTE_DIFFERENTIATION	1.97189	2.07347e-05
c5	M267	LGG	4	14	M46	SCARNA10	REGULATION_OF_GENE_SILENCING	1.12397	0.424092
c5	M268	LGG	4	22	M46	SNORD94,SNORA48	NA	1.02204	0.881351
c5	M46	LGG	3	36	M5	SCARNA10,SNORD94	NEGATIVE_REGULATION_OF_MEGAKARYOCYTE_DIFFERENTIATION	1.21697	0.181434
c5	M119	LUAD	4	19	M14	SCARNA5	NA	0.768762	0.0975962
c5	M1053	LUSC	6	15	M410	RMRP	NA	1.00471	0.975802
c5	M80	MESO	2	40	M2	SNORA48,SNORD15B,SNORD94	NA	1.07424	0.772008
c5	M675	OV	5	24	M347		NA	1.27998	0.102692
c5	M582	PAAD	4	17	M112	RPPH1,SNORD17	NA	1.1849	0.422479
c5	M96	PCPG	3	61	M9	SNORD15B,SNORA48	REGULATION_OF_GENE_SILENCING	0.791561	0.60347
c5	M287	PRAD	3	38	M66	SCARNA5	NA	1.16137	0.773477
c5	M382	READ	4	12	M46	SNORA63	NA	1.61421	0.294599
c5	M1055	SARC	4	17	M367	SNORD15B	NA	1.10519	0.630257
c5	M774	STAD	6	10	M239	SNORA63,SNORD15B	NA	0.851484	0.354511
c5	M111	THCA	3	31	M9	SNORA74B,SCARNA10	REGULATION_OF_GENE_SILENCING	1.11387	0.715879
c5	M1223	UCEC	5	25	M828	RPPH1	DNA_REPLICATION_DEPENDENT_NUCLEOSOME_ORGANIZATION	1.09665	0.675084
c5	M302	UCEC	3	44	M33	RMRP,RPPH1	CHROMATIN_ASSEMBLY	0.854434	0.474616
c5	M828	UCEC	4	34	M302	RMRP,RPPH1	DNA_REPLICATION_DEPENDENT_NUCLEOSOME_ORGANIZATION	1.00175	0.993684
c50	M102	KIRC	3	344	M8	TOP2A,TPX2,KIF18B,CKAP2L,BUB1B,CCNB2,AURKB,CDC20,CEP55,ASF1B,C12orf48,PLK1,PKMYT1,KIF14,CDCA8,ASPM,RRM2	ORGANELLE_FISSION	2.32806	1.63764e-07
c50	M22	KIRP	2	268	M4	CEP55,TOP2A,HJURP,TPX2,KIF4A,CDK1,TROAP,CDC6,ASPM,AURKB,ASF1B,KIF11,EXO1,PKMYT1,CENPF,ATAD2	CHROMOSOME_SEGREGATION	3.12563	0.000820963
c50	M6	PAAD	3	416	M2	BUB1,TPX2,NCAPH,CDCA5,UBE2C,HJURP,KIF2C,CKAP2L,DLGAP5,KIF18B,CCNB2,NAA50,NEK2,CEP55,KIF23,RAD54L,E2F1	ORGANELLE_FISSION	1.86221	0.0041811
c50	M13	PCPG	2	192	M3	TOP2A,CDK1,ASF1B,BUB1,KIF11,UBE2C,TROAP,ARHGAP11A,ANLN	ORGANELLE_FISSION	1.76739	0.221918
c50	M199	PCPG	3	68	M13	TOP2A,BUB1,ANLN	CHROMOSOME_SEGREGATION	1.65287	0.281169
c50	M268	PRAD	3	190	M64	NUSAP1,TPX2,SPAG5,CDCA5,ASF1B,KIF4A,CDC20,KIF20A,ESPL1,EXO1,BIRC5	MITOTIC_NUCLEAR_DIVISION	3.77918	0.0400268
c50	M64	PRAD	2	352	M3	NUSAP1,TPX2,TOP2A,SPAG5,KIF4A,KIF14,CDCA5,ARHGAP11A,RACGAP1,ASF1B,ESPL1,CDC20,CKAP2L,CASC5,RAD51AP1,BRCA2,SGOL2,ASPM,KIF20A,EXO1,BIRC5,PRR11,ECT2	ORGANELLE_FISSION	2.90101	0.0682731
c50	M10	THCA	2	219	M3	NUSAP1,TOP2A,ASF1B,NCAPG,RRM2,CDC6,FANCI,UHRF1,CENPF,DTL,HJURP,MKI67,MELK,TK1	ORGANELLE_FISSION	2.29509	0.00830473
c50	M121	THCA	3	117	M10	NUSAP1,TOP2A,NCAPG,RRM2,CENPF,HJURP,MKI67	ORGANELLE_FISSION	1.98297	0.027073
c50	M32	UVM	2	191	M1	BUB1,KIF11,TOP2A,MCM10,TROAP,UBE2C,ARHGAP11A,CCNB2,NUSAP1,FAM83D,TPX2	MITOTIC_NUCLEAR_DIVISION	4.99886	0.00499213
c51	M151	BLCA	3	52	M21	C16orf42,MRPS34,NDUFB10	NA	0.950681	0.741418
c51	M1729	ESCA	5	63	M1108	MRPS34,NUBP2,NDUFB10	NA	0.861975	0.603482
c51	M1919	ESCA	6	41	M1729	MRPS34,NUBP2	NA	0.971392	0.919015
c51	M1649	LUAD	7	88	M1276	MRPS34,NUBP2,STUB1,C16orf42	NA	1.10084	0.546243
c51	M1767	LUAD	8	59	M1649	MRPS34,NUBP2	BASE_EXCISION_REPAIR_AP_SITE_FORMATION	1.10674	0.525803
c51	M1784	LUAD	9	45	M1767	MRPS34	NA	1.13566	0.426924
c51	M149	LUSC	4	53	M23	MRPS34,MRPL28	NA	1.0779	0.626928
c51	M262	STAD	5	51	M28	MRPS34,NUBP2	NA	0.739635	0.0860492
c51	M28	STAD	4	62	M8	MRPS34,NUBP2	MITOCHONDRIAL_TRANSLATIONAL_TERMINATION	0.740048	0.0876752
c52	M84	BRCA	4	48	M14		NA	0.95	0.766404
c52	M35	CESC	2	48	M3	ZNF134,ZNF304	NA	1.62037	0.0649399
c52	M398	LGG	4	54	M71	ZNF304,ZNF776,ZIK1	NA	1.85959	4.59265e-05
c52	M933	LGG	5	46	M398	ZNF304,ZNF776	NA	1.93847	1.5417e-05
c52	M107	LIHC	3	37	M10	ZNF256	NA	0.951153	0.780717
c52	M691	LUAD	5	46	M221		NA	0.894919	0.489481
c52	M214	LUSC	4	44	M25	ZNF776,ZNF304	NA	1.08893	0.58281
c52	M612	OV	5	50	M345	ZNF548	NA	1.01283	0.932846
c52	M142	SARC	3	32	M7	ZNF776	NA	1.81425	0.00569661
c53	M1152	BLCA	5	12	M479	MRPL2	NA	0.862165	0.334354
c53	M541	BRCA	4	19	M131	MRPL2	MITOCHONDRIAL_TRANSLATIONAL_TERMINATION	0.999072	0.995716
c53	M449	ESCA	3	37	M71		TRANSLATIONAL_ELONGATION	0.718955	0.25774
c53	M71	ESCA	2	55	M1		TRANSLATIONAL_ELONGATION	0.615356	0.0970013
c53	M174	KIRP	3	40	M17		NA	1.79373	0.06976
c53	M1707	LUSC	7	15	M1036	MRPL2,MEA1,MRPS18A	NA	0.754726	0.0695245
c53	M1414	OV	7	14	M779	MRPS18A	NA	0.769555	0.0844939
c53	M257	STAD	5	33	M26	MRPL14	MITOCHONDRIAL_TRANSLATION	0.874493	0.439734
c54	M555	BLCA	4	20	M131	ZNF417	NA	0.943209	0.702809
c54	M435	BRCA	5	12	M84	ZNF304,ZNF548	NA	0.891501	0.504979
c54	M1152	LIHC	5	11	M489	ZNF776	NA	0.848229	0.36648
c54	M1252	MESO	4	12	M610	ZNF543,ZNF548	NA	1.67926	0.0389017
c54	M1143	OV	6	17	M612		NA	0.978729	0.887224
c54	M1010	STAD	6	15	M548	ZNF17	NA	1.29371	0.14264
c54	M1256	STAD	7	11	M1010	ZNF17,ZNF776	NA	1.20201	0.295029
c54	M791	UCEC	4	13	M269	ZNF548	NA	0.971554	0.895515
c55	M710	BLCA	4	17	M173	PRELID1,DDX41	RETROGRADE_VESICLE_MEDIATED_TRANSPORT_GOLGI_TO_ENDOPLASMIC_RETICULUM	1.06259	0.691868
c55	M728	BRCA	4	11	M198	PRELID1	NA	0.92404	0.647354
c55	M189	ESCA	3	14	M24	MXD3,LMAN2	NA	0.718882	0.252296
c55	M1740	LUSC	7	10	M1104		NA	0.87322	0.383013
c55	M1472	OV	7	19	M809	PRELID1	MITOCHONDRIAL_ELECTRON_TRANSPORT_UBIQUINOL_TO_CYTOCHROME_C	0.827184	0.2095
c55	M809	OV	6	32	M499	PRELID1	MITOCHONDRIAL_ELECTRON_TRANSPORT_UBIQUINOL_TO_CYTOCHROME_C	0.857818	0.310194
c55	M1037	SKCM	4	10	M358	NHP2	NA	0.798816	0.552723
c55	M358	SKCM	3	16	M48	PRELID1	NA	0.933805	0.857505
c56	M688	BRCA	4	12	M183	ZNF282	NA	0.850011	0.347938
c56	M490	COAD	6	12	M252	ZNF282	NA	1.4325	0.136125
c56	M1210	ESCA	4	11	M427	ZNF282	NA	0.840854	0.540924
c56	M279	LUAD	5	16	M68	ZNF282,REPIN1	NA	1.08142	0.622031
c56	M527	LUSC	5	27	M131	ZNF212,ZNF282	NA	0.836655	0.257148
c56	M1166	OV	6	25	M622	REPIN1	NA	1.08379	0.594866
c56	M622	OV	5	45	M345	REPIN1	NA	1.07055	0.652095
c56	M62	STAD	4	23	M9	ZNF282,ZNF746	NA	0.647071	0.0130572
c57	M781	BRCA	4	24	M224	KIAA2026	NA	0.79493	0.184598
c57	M1368	CESC	4	12	M679	KIAA2026	NA	1.16549	0.560914
c57	M679	CESC	3	17	M113	UHRF2	NA	1.0902	0.742037
c57	M201	ESCA	3	10	M24	KIAA2026	NA	1.07802	0.79039
c57	M766	HNSC	5	13	M193	KDM4C,KIAA2026	NA	0.920128	0.548408
c57	M471	OV	6	18	M313	UHRF2	NA	0.947389	0.720572
c57	M1015	STAD	6	11	M550	UHRF2,KIAA2026	NA	0.957533	0.803617
c57	M550	STAD	5	17	M159		NA	0.98338	0.923528
c58	M523	CESC	3	13	M55	ZNF646	NA	0.921362	0.751494
c58	M1249	ESCA	4	14	M446	TBC1D10B	NA	1.12337	0.67886
c58	M1280	LUAD	6	21	M707	SETD1A	NA	1.05296	0.744628
c58	M1397	LUSC	6	29	M686	FBRS,ZNF646	NA	0.903738	0.524824
c58	M1836	LUSC	7	20	M1397	FBRS,ZNF646	NA	1.08057	0.62501
c58	M1267	OV	6	20	M664	ZNF646,SETD1A	NA	0.869648	0.355368
c58	M278	STAD	5	18	M32	SETD1A	NA	0.863886	0.399671
c58	M1031	UCS	4	29	M391	ZNF768	NA	1.25052	0.52491
c59	M1209	BLCA	5	10	M523	CHCHD8,NDUFC2	NA	1.073	0.646131
c59	M523	BLCA	4	18	M125	CHCHD8	NA	1.05285	0.738591
c59	M477	CESC	3	18	M41	CHCHD8,NDUFC2	NA	1.05666	0.831839
c59	M411	HNSC	5	21	M82		NA	1.01284	0.927088
c59	M133	LUAD	4	16	M16	CHCHD8	NA	1.12108	0.473171
c59	M1165	SARC	4	14	M408		NA	1.13237	0.549965
c59	M408	SARC	3	21	M39	CHCHD8	NA	0.838299	0.400791
c6	M175	BLCA	3	68	M21	UBE2W,YTHDF3	NA	1.00082	0.995738
c6	M265	BRCA	3	110	M24	NUDCD1,DCAF13,MTDH,MTERFD1,FAM91A1,TAF2,YWHAZ	NA	1.11769	0.520715
c6	M269	BRCA	3	56	M24	VCPIP1,UBE2W,ARFGEF1	NA	1.08823	0.62421
c6	M31	CESC	2	40	M3	COPS5,UQCRB	ATP_SYNTHESIS_COUPLED_ELECTRON_TRANSPORT	0.886334	0.643964
c6	M172	HNSC	4	20	M15	UBE2W	NA	1.01837	0.89576
c6	M94	HNSC	4	54	M15	ENY2,DCAF13	TRANSLATIONAL_INITIATION	1.25166	0.106124
c6	M656	KICH	4	125	M142	RAD21,ARMC1,MTDH,VCPIP1,KIAA0196,TMEM68,PHF20L1	NA	3.64433	0.106845
c6	M240	LIHC	4	25	M27	MRPL13	MITOCHONDRIAL_TRANSLATIONAL_TERMINATION	1.06446	0.728336
c6	M480	LIHC	4	34	M86	CPNE3,VCPIP1	NA	0.962667	0.83377
c6	M185	LUAD	4	41	M29	UBE2W,YTHDF3	NA	1.19548	0.261627
c6	M186	LUAD	4	55	M29	NUDCD1,KIAA1429	NA	1.63532	0.002553
c6	M29	LUAD	3	96	M2	UBE2W,NUDCD1	NA	1.36273	0.0537476
c6	M545	LUAD	5	26	M186	NSMCE2	MITOCHONDRIAL_TRANSLATIONAL_TERMINATION	1.45459	0.0205441
c6	M156	LUSC	4	51	M23	MRPL13	TRANSLATIONAL_INITIATION	0.76185	0.0837168
c6	M161	LUSC	4	40	M23	ARMC1,UBE2W,YTHDF3	NA	1.0162	0.91824
c6	M600	LUSC	5	40	M156	MRPL13	TRANSLATIONAL_INITIATION	0.847812	0.290405
c6	M429	MESO	3	16	M46	POLR2K	NA	1.08599	0.738215
c6	M527	OV	5	33	M327	UBE2W	NA	1.3202	0.065565
c6	M556	PAAD	4	22	M112	C8orf59	MITOCHONDRIAL_TRANSLATIONAL_TERMINATION	1.12256	0.586252
c6	M275	PRAD	3	55	M65	TCEB1	TRANSLATIONAL_INITIATION	2.64184	0.096751
c6	M661	PRAD	4	40	M275	TCEB1,ENY2,ZNF706	NA	2.46484	0.123774
c6	M69	SARC	3	23	M3	NDUFB9	ATP_SYNTHESIS_COUPLED_ELECTRON_TRANSPORT	1.25644	0.272999
c6	M319	SKCM	3	144	M41	ARMC1,MTDH,RAD21,PHF20L1,TTC35,CSPP1,UTP23,ARFGEF1	NA	1.2706	0.524828
c6	M41	SKCM	2	170	M3	ARMC1,MTDH,RAD21,PHF20L1,TTC35,CSPP1,UTP23,ARFGEF1	PROTEIN_DESTABILIZATION	1.27739	0.515467
c6	M265	STAD	5	46	M29	ENY2,MRPL15	PROTEIN_DESTABILIZATION	1.36298	0.0757779
c6	M29	STAD	4	68	M8	ENY2,MRPL15	TRANSLATIONAL_INITIATION	1.37939	0.0650615
c6	M814	STAD	6	26	M265	ENY2	CELLULAR_RESPIRATION	1.1923	0.313872
c6	M1062	UCEC	5	57	M505	UBE2W,FAM91A1,TCEA1	NA	1.76924	0.0121471
c6	M114	UCEC	3	117	M15	UBE2W,FAM91A1,TCEA1,DCAF13,MRPL13,AZIN1	NA	1.64082	0.027684
c6	M505	UCEC	4	85	M114	UBE2W,FAM91A1,TCEA1,AZIN1	NA	1.70246	0.0186012
c60	M146	BLCA	3	19	M21	POLR2C	NA	1.23125	0.176082
c60	M562	CESC	3	19	M69	CIAPIN1,OGFOD1	NA	1.05504	0.835945
c60	M83	LUAD	4	17	M9	GOT2	NA	1.11833	0.482816
c60	M1086	LUSC	6	12	M422	POLR2C,CIAPIN1	NA	0.929938	0.639342
c60	M422	LUSC	5	17	M101	POLR2C	NA	0.923344	0.606641
c60	M1314	OV	6	10	M679	CIAPIN1	NA	0.985209	0.921572
c60	M627	PRAD	4	18	M264	CIAPIN1	NA	0.694915	0.496996
c61	M188	BLCA	3	55	M21		NA	0.99212	0.958836
c61	M221	BRCA	3	36	M22	AKAP11,KIAA1704,UTP14C,COG3	NA	0.903432	0.555765
c61	M444	ESCA	3	60	M69	COG3,KIAA1704	NA	0.856938	0.584275
c61	M137	HNSC	4	37	M15	UTP14C,ELF1	NA	1.19476	0.200135
c61	M124	LUSC	4	71	M21	MED4,UTP14C	NA	0.901564	0.503458
c61	M489	OV	5	102	M326	COG3,UTP14C,NUPL1	NA	1.30778	0.0751434
c61	M777	OV	6	58	M489	COG3,UTP14C,NUFIP1	NA	1.22818	0.172739
c62	M227	BLCA	3	28	M23	EXOC3	NA	0.948396	0.730026
c62	M873	BLCA	4	16	M227	EXOC3	NA	0.979167	0.890742
c62	M82	CESC	2	23	M3	MRPL36	NA	0.828085	0.46973
c62	M406	ESCA	3	14	M62	NDUFS6	NA	0.974497	0.927613
c62	M153	HNSC	4	29	M15	MRPL36,PDCD6	LOOP_OF_HENLE_DEVELOPMENT	0.983992	0.907407
c62	M388	LUAD	5	16	M100		NA	0.908073	0.543145
c62	M115	STAD	4	10	M10	CLPTM1L	NA	0.80589	0.215564
c63	M212	BRCA	3	17	M22	WAC,KIF5B	NA	1.3486	0.0875859
c63	M106	LUAD	4	18	M13	YME1L1	NA	0.980595	0.901973
c63	M521	LUSC	5	18	M129	WAC,YME1L1	NA	1.19833	0.242895
c63	M134	MESO	2	21	M2	YME1L1,ACBD5	NA	0.92558	0.755192
c63	M1012	OV	6	16	M555		NA	1.12493	0.435301
c63	M1145	READ	5	13	M414	ABI1	HISTONE_MONOUBIQUITINATION	0.696653	0.428632
c63	M73	STAD	4	15	M9	YME1L1,WAC	NA	0.849259	0.350095
c64	M271	BRCA	3	22	M24	GTF2F2,MED4,MRPS31	NA	0.853342	0.363926
c64	M162	CESC	2	26	M3	MED4,MRPS31,GTF2F2	NA	1.42703	0.174301
c64	M1244	ESCA	4	19	M444	MED4,GTF2F2	NA	1.11176	0.706476
c64	M700	HNSC	5	17	M166	GTF2F2,MED4	NA	1.40126	0.015431
c64	M137	LIHC	3	31	M10	GTF2F2,MED4,TPT1	NA	0.654222	0.0214128
c64	M491	LUSC	5	24	M124	MED4	NA	0.842934	0.272983
c64	M302	PRAD	3	21	M66	MED4	NA	0.61039	0.349751
c65	M591	BRCA	4	14	M149	ATG5,QRSL1	NA	1.53047	0.0155256
c65	M1182	ESCA	4	12	M404	QRSL1,ATG5	NA	1.45226	0.186536
c65	M201	LUAD	4	18	M33	ATG5,SNX3	NEGATIVE_REGULATION_OF_PHAGOCYTOSIS	1.05316	0.744161
c65	M1158	LUSC	6	21	M467	ATG5	NEGATIVE_REGULATION_OF_PHAGOCYTOSIS	0.970293	0.846521
c65	M1758	LUSC	7	10	M1158	QRSL1,ATG5	NA	0.791704	0.133739
c65	M467	LUSC	5	30	M114		NA	0.920496	0.595377
c65	M42	STAD	4	13	M9	ATG5	ISOPRENOID_BIOSYNTHETIC_PROCESS	1.14696	0.430124
c66	M763	BRCA	4	16	M216	PDCD2	TRANSCRIPTION_ELONGATION_FROM_RNA_POLYMERASE_I_PROMOTER	1.07276	0.684275
c66	M178	ESCA	3	40	M22	TCP1,PDCD2	TRANSCRIPTION_BY_RNA_POLYMERASE_III	1.18131	0.557545
c66	M1154	LUSC	6	22	M466	PSMB1,MRPL18	PYRIMIDINE_DEOXYRIBONUCLEOTIDE_BIOSYNTHETIC_PROCESS	0.845662	0.287378
c66	M466	LUSC	5	49	M114	TCP1,PSMB1,PCMT1	PHOSPHORYLATION_OF_RNA_POLYMERASE_II_C_TERMINAL_DOMAIN	0.817284	0.198427
c66	M1159	OV	6	19	M618	PSMB1	NA	0.947471	0.72071
c66	M618	OV	5	30	M345	PSMB1	NA	1.1263	0.431194
c66	M164	SARC	3	10	M7	MRPL18	NA	0.940395	0.768488
c67	M917	BRCA	6	173	M294	CD3E,CD2,ITK,CD3D,SLAMF6,SH2D1A,ZNF831,PRF1,SIRPG,BTLA,IL2RG	T_CELL_ACTIVATION	0.612637	0.00550607
c67	M75	KIRP	4	195	M6	CD3E,CCL5,CD247,LCK,TIGIT,CD2,GBP5,ITK,LAG3,NKG7	T_CELL_ACTIVATION	1.32628	0.361582
c67	M38	OV	4	218	M5	ITK,CD2,CD3E,SLA2,SLAMF6,GZMA,CXCR6,P2RY10,SLAMF1,CD247,CCL5,IL2RG,CD3D	T_CELL_ACTIVATION	0.961629	0.79632
c67	M247	PCPG	5	175	M20	IL2RG,CD96,CD3E,CD48,CD2,ITGAL,CCL5	T_CELL_ACTIVATION	0.745449	0.513745
c67	M1257	UCEC	8	157	M939	CD3E,CD2,SIRPG,KLRK1,CD247,TRAF3IP3,IL2RG,NKG7	T_CELL_ACTIVATION	0.524451	0.00449579
c67	M397	UCEC	6	198	M78	CD3E,CD2,SH2D1A,SIRPG,KLRK1,CD247,TRAF3IP3,IL2RG,NKG7,SLAMF6	T_CELL_ACTIVATION	0.500149	0.00231622
c67	M939	UCEC	7	181	M397	CD3E,CD2,SH2D1A,SIRPG,KLRK1,CD247,TRAF3IP3,IL2RG,NKG7,SLAMF6	T_CELL_ACTIVATION	0.54597	0.0073476
c68	M112	CESC	2	55	M3	CTBP1,FAM193A	NA	0.821786	0.450188
c68	M82	ESCA	2	102	M1	FAM193A,CTBP1,ZNF721,TMEM128	NA	0.961672	0.89102
c68	M87	HNSC	4	48	M13	STX18,CTBP1,MRFAP1L1,GAK	NA	0.898659	0.444423
c68	M216	LUSC	4	62	M25	CTBP1,ADD1	NA	1.17911	0.285612
c68	M761	LUSC	5	43	M216	CTBP1,ADD1,GAK	NA	1.13266	0.42049
c68	M133	MESO	2	45	M2	CNO	NA	0.882474	0.613951
c68	M337	OV	4	114	M143	FAM193A,MRFAP1L1	NA	0.922567	0.594488
c69	M1193	BLCA	5	21	M499	OTUD5	AUTOPHAGY_OF_MITOCHONDRION	0.709047	0.0258032
c69	M1660	BLCA	6	13	M1193	OTUD5	NA	0.754636	0.0675512
c69	M517	BRCA	4	13	M126	GPKOW,OTUD5	RETROGRADE_TRANSPORT_ENDOSOME_TO_PLASMA_MEMBRANE	0.989191	0.949927
c69	M50	COAD	4	19	M8	OTUD5	REGULATION_OF_RECEPTOR_LOCALIZATION_TO_SYNAPSE	1.27014	0.319657
c69	M309	LUAD	5	10	M80	GRIPAP1	NA	0.750289	0.0740568
c69	M80	LUAD	4	22	M9	GPKOW	REGULATION_OF_PROTEIN_COMPLEX_DISASSEMBLY	0.865465	0.364242
c7	M177	BLCA	3	52	M21	CYHR1	NA	0.879328	0.401625
c7	M728	BLCA	4	21	M177	HSF1,EXOSC4	RNA_3_END_PROCESSING	1.24667	0.150989
c7	M266	BRCA	3	96	M24	SHARPIN,EXOSC4,PPP1R16A,MAF1	NA	0.952122	0.775935
c7	M448	CESC	3	28	M32	SHARPIN,FBXL6	NA	1.34733	0.250966
c7	M342	ESCA	3	112	M46	RPL8,PUF60	TRANSLATIONAL_INITIATION	0.694763	0.206348
c7	M1237	HNSC	6	10	M571	PUF60	NA	1.1787	0.237582
c7	M571	HNSC	5	21	M118	EXOSC4,PUF60	NA	1.12336	0.402901
c7	M573	HNSC	5	15	M118	SHARPIN	NA	1.06312	0.660094
c7	M306	LGG	4	26	M56		RESPONSE_TO_SALT	0.855554	0.284822
c7	M825	LGG	5	16	M306	VPS28	NA	0.942829	0.685935
c7	M234	LIHC	4	52	M25	SHARPIN,VPS28,EXOSC4	ELECTRON_TRANSPORT_CHAIN	0.983426	0.926005
c7	M25	LIHC	3	113	M7	SHARPIN,VPS28,EXOSC4,RPL8,SCRIB,GPR172A	PROTEIN_LOCALIZATION_TO_ENDOPLASMIC_RETICULUM	1.0753	0.68732
c7	M183	LUAD	4	10	M28	PUF60,EXOSC4	NA	1.16354	0.34347
c7	M28	LUAD	3	72	M2	ADCK5,LRRC14,SHARPIN,ZC3H3	MATURATION_OF_5_8S_RRNA	1.14758	0.385515
c7	M1311	LUSC	6	12	M573	HSF1	NA	1.13131	0.4261
c7	M1312	LUSC	6	16	M573	SHARPIN	NA	0.991978	0.958798
c7	M141	LUSC	4	67	M23	SHARPIN,PPP1R16A	NA	1.08138	0.615288
c7	M573	LUSC	5	42	M141	SHARPIN,HSF1	NA	1.11408	0.486825
c7	M82	MESO	2	52	M2	CYHR1,SHARPIN,ADCK5,GLI4	NA	0.904208	0.684931
c7	M1091	PAAD	5	25	M527	PUF60,SHARPIN	NA	1.10457	0.638547
c7	M1394	PAAD	6	15	M1091	SHARPIN	NA	1.35354	0.153233
c7	M94	PCPG	3	38	M9	CYHR1,VPS28	RNA_POLYADENYLATION	0.701893	0.443925
c7	M1631	READ	6	17	M1054	MAF1	NA	0.807431	0.644969
c7	M340	READ	4	91	M36	CYHR1,SHARPIN,RPL8,PUF60	NUCLEAR_TRANSCRIBED_MRNA_CATABOLIC_PROCESS_NONSENSE_MEDIATED_DECAY	1.02001	0.965744
c7	M36	READ	3	118	M9	CYHR1,SHARPIN,RPL8,ZNF517,PUF60,ZNF7	NUCLEAR_TRANSCRIBED_MRNA_CATABOLIC_PROCESS_NONSENSE_MEDIATED_DECAY	1.2451	0.640061
c7	M79	SARC	3	13	M3	ADCK5	NA	1.14901	0.504126
c7	M52	STAD	4	34	M9	C8orf30A	MATURATION_OF_5_8S_RRNA	0.975606	0.887062
c7	M1044	UCEC	5	24	M500	SHARPIN	NA	1.3425	0.183715
c7	M112	UCEC	3	83	M14	SHARPIN,EXOSC4,CYHR1	NA	1.3104	0.221371
c7	M500	UCEC	4	51	M112	SHARPIN,CYHR1	RNA_3_END_PROCESSING	1.10765	0.642015
c70	M1283	BLCA	5	10	M579	DYRK1A	NA	1.06698	0.672223
c70	M386	CESC	3	17	M17	TRAPPC10	NA	0.843383	0.513116
c70	M399	ESCA	3	37	M61	BRWD1,DYRK1A,TRAPPC10	NA	0.820347	0.481118
c70	M244	KIRP	3	30	M30	MORC3	NA	1.33345	0.350504
c70	M745	LUSC	5	39	M211	SON,TRAPPC10	NA	1.07749	0.628499
c70	M388	PCPG	4	20	M81	TRAPPC10	NA	2.05889	0.125675
c71	M1590	BLCA	6	11	M1004	MAGEA12,CSAG1,MAGEA2	NA	0.733462	0.0442961
c71	M107	ESCA	3	12	M6	MAGEA2	NA	1.13783	0.64735
c71	M1557	LUSC	6	10	M782	CSAG1	NA	1.29186	0.100956
c71	M782	LUSC	5	20	M226		NA	1.25594	0.143843
c71	M190	SKCM	4	12	M7	MAGEA3	NA	0.763108	0.472982
c71	M584	UCS	4	13	M99		NA	0.838148	0.615115
c72	M229	BLCA	3	14	M23	DHCR7	STEROL_BIOSYNTHETIC_PROCESS	1.29394	0.0940711
c72	M666	LGG	5	14	M193	HMGCS1	REGULATION_OF_STEROID_METABOLIC_PROCESS	0.66653	0.00656599
c72	M567	PAAD	4	13	M112	HMGCS1	STEROL_BIOSYNTHETIC_PROCESS	1.53566	0.0460614
c72	M564	PRAD	4	15	M250	INSIG1	STEROL_BIOSYNTHETIC_PROCESS	0.401071	0.120444
c72	M225	READ	3	18	M16	HMGCS1	STEROL_BIOSYNTHETIC_PROCESS	1.04182	0.927623
c72	M215	STAD	5	17	M16	SC4MOL	STEROL_BIOSYNTHETIC_PROCESS	0.976005	0.889123
c73	M232	BLCA	3	24	M23	DGCR14,THAP7	NA	0.923932	0.605486
c73	M634	CESC	3	21	M93	THAP7	NA	0.648283	0.0983139
c73	M1294	HNSC	6	21	M644	DGCR6L,THAP7	NA	1.11454	0.435123
c73	M644	HNSC	5	26	M140	DGCR6L,THAP7	NA	1.20361	0.185168
c73	M1499	SARC	5	10	M1073		NA	0.900055	0.612176
c73	M252	UCS	3	29	M21	UFD1L,DGCR14	NA	0.745865	0.398165
c74	M482	BLCA	4	10	M120	RPL7L1	NA	1.09463	0.554866
c74	M140	CESC	2	21	M3	XPO5	RIBONUCLEOPROTEIN_COMPLEX_BIOGENESIS	0.927436	0.771147
c74	M746	CESC	3	13	M140	RPL7L1,XPO5	NA	1.14598	0.600231
c74	M1255	ESCA	4	12	M449	RPL7L1	NCRNA_METABOLIC_PROCESS	0.542336	0.0363125
c74	M566	HNSC	5	16	M116		BLASTOCYST_FORMATION	1.191	0.20933
c74	M800	STAD	6	10	M257	XPO5,HSP90AB1	NA	0.942689	0.734017
c75	M834	BLCA	4	13	M215	CTBP1	NA	0.701182	0.0216258
c75	M1098	BRCA	5	17	M514	GAK	NA	1.14416	0.435163
c75	M248	COAD	5	16	M56	CTBP1,TNIP2	NA	0.64115	0.0695674
c75	M1338	ESCA	4	21	M497	CTBP1	NA	0.867908	0.619041
c75	M108	LUAD	4	16	M13	CTBP1	NA	1.17774	0.302557
c75	M672	UCEC	4	16	M211	CTBP1	NA	0.877361	0.551734
c76	M516	BRCA	4	10	M126		NA	0.959729	0.811416
c76	M199	ESCA	3	24	M24		NA	0.894633	0.700842
c76	M832	ESCA	4	14	M199		NA	0.780906	0.387532
c76	M380	HNSC	5	14	M78	PEX16,ARFGAP2	NA	1.09018	0.535845
c76	M1570	OV	7	13	M890	NDUFS3,PSMC3	NA	0.764822	0.0760564
c76	M1047	SARC	4	15	M367	NDUFS3,PEX16	NA	1.08665	0.689138
c77	M532	BRCA	4	13	M129	SNRPB2	NA	1.31378	0.116104
c77	M492	ESCA	3	21	M80	POLR3F	NA	1.20719	0.502635
c77	M722	LUAD	5	13	M225	CRNKL1	NA	0.84638	0.293768
c77	M519	LUSC	5	17	M128	CRNKL1	NA	1.48906	0.011247
c77	M1573	OV	7	10	M893	CRNKL1,POLR3F	NA	0.959256	0.783223
c77	M893	OV	6	18	M522	POLR3F	NA	1.03447	0.822265
c78	M863	BRCA	4	16	M264	VPS35,DNAJA2	NA	1.44841	0.0344807
c78	M228	COAD	5	18	M49	VPS35	NA	0.887116	0.620432
c78	M463	COAD	6	10	M228	VPS35	NA	1.02238	0.927277
c78	M423	LUSC	5	18	M101	LONP2,DNAJA2	NA	1.20845	0.220389
c78	M1313	OV	6	13	M679	VPS35	NA	0.845857	0.268044
c78	M679	OV	5	40	M348		NA	0.949973	0.735747
c79	M335	COAD	5	31	M79	CXCR5,MS4A1	B_CELL_ACTIVATION	1.02427	0.922017
c79	M79	COAD	4	53	M12	CXCR5,FCRL1,BLK,MS4A1	B_CELL_ACTIVATION	1.22807	0.396341
c79	M179	KIRC	5	29	M18	CD19	B_CELL_ACTIVATION	1.76112	0.000310218
c79	M872	PCPG	6	16	M246	CD19,SPIB	B_CELL_ACTIVATION	2.03139	0.131025
c79	M292	READ	5	35	M21	MS4A1,BLK	REGULATION_OF_B_CELL_RECEPTOR_SIGNALING_PATHWAY	1.92816	0.16778
c79	M1411	TGCT	6	20	M1075	FCRLA,BLK,CD79B	B_CELL_ACTIVATION	0.565605	0.114382
c8	M230	BLCA	3	48	M23	SMU1,STOML2,DCAF10	NA	1.01148	0.940604
c8	M879	BLCA	4	26	M230	STOML2	POSITIVE_REGULATION_OF_MITOCHONDRIAL_MEMBRANE_POTENTIAL	0.968417	0.834159
c8	M880	BLCA	4	22	M230	DCAF10	NA	0.973077	0.858497
c8	M782	BRCA	4	14	M224	DCAF12	NA	1.01139	0.947553
c8	M1370	CESC	4	11	M680	DCAF10	NA	0.909616	0.714405
c8	M680	CESC	3	21	M113	TOPORS	UBIQUITIN_DEPENDENT_PROTEIN_CATABOLIC_PROCESS_VIA_THE_MULTIVESICULAR_BODY_SORTING_PATHWAY	0.945862	0.829698
c8	M281	COAD	5	28	M60	EXOSC3,STOML2	CLEAVAGE_INVOLVED_IN_RRNA_PROCESSING	0.748221	0.2374
c8	M541	COAD	6	12	M281	STOML2,C9orf23	NA	0.952808	0.841787
c8	M119	ESCA	3	14	M8	VCP	NA	0.798058	0.424488
c8	M120	ESCA	3	21	M8	STOML2	NA	1.3081	0.35239
c8	M8	ESCA	2	61	M1	STOML2,VCP	VESICLE_CARGO_LOADING	0.786658	0.395967
c8	M167	GBM	3	22	M8	DCTN3	NA	0.861359	0.43791
c8	M136	HNSC	4	40	M15	STOML2	NA	1.06847	0.63269
c8	M104	LUAD	4	35	M13		NA	1.22915	0.193851
c8	M399	LUAD	5	14	M104	STOML2,NDUFB6	NA	1.05064	0.756333
c8	M400	LUAD	5	11	M104	SMU1	NA	0.993087	0.965069
c8	M1227	LUSC	6	23	M501	STOML2	NA	1.05627	0.725448
c8	M1228	LUSC	6	16	M501	SMU1	NA	1.15241	0.363752
c8	M1779	LUSC	7	14	M1227	STOML2	NA	1.16646	0.323057
c8	M501	LUSC	5	39	M127	STOML2,SMU1	NA	1.01322	0.932825
c8	M1234	MESO	4	15	M593	C9orf23	OXIDATIVE_PHOSPHORYLATION	0.663592	0.101776
c8	M1605	MESO	5	10	M1234	C9orf23,NDUFB6	NA	0.547209	0.016749
c8	M132	OV	4	27	M23	DCTN3,STOML2	NA	0.812813	0.170271
c8	M308	OV	5	22	M131	SMU1	NA	0.796195	0.132012
c8	M309	OV	5	19	M132	DCTN3	NA	0.763691	0.0747377
c8	M573	PAAD	4	23	M112	NFX1,DCAF12	NA	1.14238	0.532784
c8	M205	SARC	3	29	M7	STOML2,SMU1	POSITIVE_REGULATION_OF_MITOCHONDRIAL_MEMBRANE_POTENTIAL	0.952611	0.81539
c8	M705	SARC	4	11	M205	SMU1	NA	1.20985	0.360126
c8	M706	SARC	4	14	M205	STOML2,APTX	NA	0.983668	0.93702
c8	M126	SKCM	2	30	M3	STOML2,UBAP2	POSITIVE_REGULATION_OF_MITOCHONDRIAL_MEMBRANE_POTENTIAL	1.60983	0.254491
c80	M442	ESCA	3	13	M69	SAP18	NA	1.27986	0.380226
c80	M699	HNSC	5	11	M166	SAP18	NA	1.04891	0.730765
c80	M322	LUAD	5	24	M85	SAP18,ALG5,POLR1D	INTRACILIARY_TRANSPORT_INVOLVED_IN_CILIUM_ASSEMBLY	1.04627	0.776687
c80	M849	LUAD	6	11	M322	POLR1D	NA	0.960496	0.799342
c80	M776	OV	6	16	M489	SAP18	NA	1.12642	0.431182
c80	M394	STAD	5	16	M81	POMP,POLR1D	NA	0.878876	0.45898
c81	M1046	GBM	6	86	M432	CD2,LCK,CD96,CD3E,GZMK	T_CELL_ACTIVATION	1.19705	0.349499
c81	M432	GBM	5	102	M82	CD2,LCK,CD96,CD3E,CXCR3,GZMK	T_CELL_ACTIVATION	1.19705	0.349499
c81	M82	GBM	4	109	M5	CD2,LCK,CD96,CD3E,CXCR3,GZMK	T_CELL_ACTIVATION	1.19705	0.349499
c81	M122	LGG	4	121	M15	CD2,CD3E,CD96,CCL5	T_CELL_ACTIVATION	1.31104	0.0639774
c81	M15	LGG	3	186	M2	CD2,CD3E,CD96,CCL5,CD8A,IL2RG	T_CELL_ACTIVATION	1.28137	0.0897969
c81	M503	LGG	5	84	M122	CD2,CD96,CD3E	T_CELL_ACTIVATION	1.40168	0.0210885
c82	M1225	BLCA	5	11	M527	SDHAF2	NA	1.22695	0.182818
c82	M444	LUAD	5	24	M131	TMEM223	TRANSLATIONAL_TERMINATION	1.18677	0.286446
c82	M1161	LUSC	6	14	M468	POLR2G	NA	0.831035	0.235268
c82	M2048	OV	8	10	M1568	C11orf31	NA	0.713442	0.0269296
c82	M1248	SARC	5	14	M535	C11orf10	NA	0.8744	0.519678
c83	M1538	BLCA	5	10	M869	C5orf22	NA	0.840153	0.257203
c83	M633	BRCA	4	10	M161	DNAJC21,C5orf22	NA	0.971485	0.866984
c83	M587	CESC	3	11	M78	C5orf22	NA	0.944533	0.825551
c83	M479	PAAD	4	10	M111	ZNF131	NA	1.21914	0.353043
c83	M267	READ	5	21	M19		NA	1.48127	0.389811
c84	M159	BLCA	3	41	M21	PAF1,MRPS12	REGULATION_OF_TRANSCRIPTION_FROM_RNA_POLYMERASE_II_PROMOTER_IN_RESPONSE_TO_HYPOXIA	0.820402	0.197454
c84	M26	LUAD	3	68	M2	MRPS12,TIMM50,POLR2I	NEGATIVE_REGULATION_OF_MRNA_PROCESSING	1.429	0.025664
c84	M205	LUSC	4	72	M25	AKT2	REGULATION_OF_TRANSCRIPTION_FROM_RNA_POLYMERASE_II_PROMOTER_IN_RESPONSE_TO_HYPOXIA	0.896195	0.480511
c84	M75	SARC	3	52	M3	TIMM50,MRPS12	REGULATION_OF_TRANSCRIPTION_FROM_RNA_POLYMERASE_II_PROMOTER_IN_RESPONSE_TO_HYPOXIA	0.844422	0.416072
c84	M30	UCS	2	74	M2	SUPT5H,PSMC4,MED29,AKT2,TIMM50	NA	0.828017	0.591721
c85	M1630	BLCA	6	11	M1139	RPL14	NA	1.05163	0.742227
c85	M714	KIRP	4	11	M188	RPL32	NA	1.24027	0.483878
c85	M272	MESO	3	15	M13	RPL14	TRANSLATIONAL_INITIATION	0.749325	0.24839
c85	M990	PCPG	5	16	M357	RPL32	COTRANSLATIONAL_PROTEIN_TARGETING_TO_MEMBRANE	0.972889	0.952057
c85	M432	SARC	4	18	M66	RPL29	COTRANSLATIONAL_PROTEIN_TARGETING_TO_MEMBRANE	1.28242	0.231688
c86	M200	BLCA	3	21	M21	PSMD10	NA	1.01791	0.907691
c86	M601	LIHC	4	15	M129	HTATSF1	NA	1.4289	0.048756
c86	M272	LUAD	5	22	M65	PSMD10	NA	1.25177	0.158684
c86	M813	LUAD	6	16	M272	PSMD10,UBE2A	NA	1.07625	0.644108
c86	M1075	LUSC	6	20	M419	MCTS1	NA	0.71945	0.0365807
c87	M252	BLCA	5	11	M26	CD1A,FCER1A	NA	0.952958	0.752873
c87	M1376	HNSC	6	15	M752	CD1A	ANTIGEN_PROCESSING_AND_PRESENTATION_VIA_MHC_CLASS_IB	0.719289	0.0182774
c87	M752	HNSC	5	19	M188	CD1A	ANTIGEN_PROCESSING_AND_PRESENTATION_VIA_MHC_CLASS_IB	0.802051	0.113022
c87	M694	PAAD	5	11	M281	CD1C,CD1E	ANTIGEN_PROCESSING_AND_PRESENTATION_VIA_MHC_CLASS_IB	0.751942	0.185412
c87	M417	UCEC	6	11	M84	CD1A	NA	0.784574	0.272307
c88	M69	BLCA	4	25	M9	TCP1,LTV1	NA	1.07019	0.658261
c88	M508	HNSC	5	12	M99	TCP1	MITOCHONDRIAL_TRANSLATION	1.37859	0.0215274
c88	M575	LIHC	4	12	M118	PDCD2	MITOCHONDRIAL_TRANSLATION	1.56592	0.0135125
c88	M251	STAD	5	23	M23		TRANSCRIPTION_INITIATION_FROM_RNA_POLYMERASE_III_PROMOTER	0.961369	0.822435
c88	M788	STAD	6	11	M251	PDCD2	NA	0.853463	0.36528
c89	M800	BLCA	4	12	M202	ATRIP	NA	1.01317	0.932136
c89	M1017	PAAD	5	10	M505	APEH	NA	1.11893	0.596361
c89	M1217	READ	5	12	M489	UQCRC1,APEH	GTP_BIOSYNTHETIC_PROCESS	0.614293	0.302564
c89	M1101	STAD	6	19	M606	APEH,UQCRC1	GTP_BIOSYNTHETIC_PROCESS	0.762805	0.122457
c89	M1300	STAD	7	10	M1101	IFRD2,APEH	NA	0.805839	0.216596
c9	M318	BRCA	5	16	M37	HLA.A,HLA.F	NA	0.789539	0.173675
c9	M37	BRCA	4	64	M5	PSMB9,HLA.F	ANTIGEN_PROCESSING_AND_PRESENTATION_OF_PEPTIDE_ANTIGEN_VIA_MHC_CLASS_I	0.798085	0.194481
c9	M1706	CESC	7	10	M1512	HLA.F	NA	1.02928	0.91151
c9	M78	COAD	4	34	M12	TAP1	ANTIGEN_PROCESSING_AND_PRESENTATION_OF_PEPTIDE_ANTIGEN_VIA_MHC_CLASS_I	0.739416	0.214326
c9	M1041	GBM	6	19	M430	HLA.B	NA	0.973565	0.889243
c9	M430	GBM	5	24	M81	HLA.B	NA	1.01021	0.95784
c9	M1390	HNSC	6	17	M762	HLA.B,HLA.F	NA	0.977075	0.867457
c9	M132	KICH	3	27	M13	HLA.E,HLA.A,HLA.B	T_CELL_RECEPTOR_SIGNALING_PATHWAY	0.241139	0.0763094
c9	M594	KICH	4	19	M132	HLA.E	NA	0.24463	0.0792259
c9	M162	KIRC	5	26	M11	TAP1	ANTIGEN_PROCESSING_AND_PRESENTATION_OF_EXOGENOUS_PEPTIDE_ANTIGEN_VIA_MHC_CLASS_I	1.03489	0.821912
c9	M681	KIRC	6	13	M162	HLA.F,HLA.B	NA	1.09222	0.562657
c9	M197	KIRP	3	23	M21	HLA.B,TAP1	ANTIGEN_PROCESSING_AND_PRESENTATION_OF_ENDOGENOUS_PEPTIDE_ANTIGEN	1.29798	0.39776
c9	M120	LGG	4	29	M14	HLA.B,PSMB8	ANTIGEN_PROCESSING_AND_PRESENTATION_OF_EXOGENOUS_PEPTIDE_ANTIGEN_VIA_MHC_CLASS_I	1.39449	0.0234621
c9	M150	LIHC	4	54	M11	PSMB9,PSMB8,HLA.B	INTERFERON_GAMMA_MEDIATED_SIGNALING_PATHWAY	0.712536	0.0616673
c9	M655	LIHC	5	22	M150	HLA.B	T_CELL_RECEPTOR_SIGNALING_PATHWAY	0.602356	0.00605534
c9	M1553	LUAD	7	25	M1147	HLA.F,HLA.B	T_CELL_RECEPTOR_SIGNALING_PATHWAY	0.740408	0.0590657
c9	M1729	LUAD	8	18	M1553	HLA.F,HLA.B	NA	0.80444	0.169707
c9	M959	LUSC	6	13	M313	HLA.B,HLA.F	NA	0.982527	0.909233
c9	M266	OV	5	13	M101		NA	0.965911	0.818578
c9	M180	PAAD	5	10	M28	HLA.B	NA	0.836171	0.402427
c9	M174	PCPG	3	22	M11	HLA.B,TAP1	ANTIGEN_PROCESSING_AND_PRESENTATION_OF_PEPTIDE_ANTIGEN_VIA_MHC_CLASS_I	0.832311	0.683539
c9	M196	PRAD	4	25	M37	HLA.F,TAP1	ANTIGEN_PROCESSING_AND_PRESENTATION_OF_EXOGENOUS_PEPTIDE_ANTIGEN_VIA_MHC_CLASS_I	0.590003	0.340382
c9	M461	PRAD	5	18	M196	HLA.F	NA	0.412571	0.132776
c9	M287	READ	5	20	M20	HLA.F,HLA.B	ANTIGEN_PROCESSING_AND_PRESENTATION_OF_EXOGENOUS_PEPTIDE_ANTIGEN_VIA_MHC_CLASS_I	0.679746	0.399322
c9	M488	SARC	4	17	M99	HLA.B,HLA.C	NA	0.525254	0.00266459
c9	M663	THCA	6	42	M191	TAP1,HLA.F	RESPONSE_TO_INTERFERON_GAMMA	0.809012	0.476249
c9	M405	UCEC	6	32	M81	HLA.B	ANTIGEN_PROCESSING_AND_PRESENTATION_OF_PEPTIDE_ANTIGEN_VIA_MHC_CLASS_I	0.674847	0.0784264
c9	M81	UCEC	5	51	M9	HLA.B,PSMB9	ANTIGEN_PROCESSING_AND_PRESENTATION_OF_PEPTIDE_ANTIGEN_VIA_MHC_CLASS_I	0.628347	0.0395163
c9	M1658	UCS	6	35	M1155	HLA.B,HLA.C	T_CELL_RECEPTOR_SIGNALING_PATHWAY	0.907979	0.776774
c90	M1115	BRCA	5	13	M524		NA	1.17287	0.355668
c90	M533	CESC	3	10	M58	PACS2	NA	0.634118	0.084219
c90	M578	LIHC	4	10	M119	BRF1	NA	1.07908	0.674808
c90	M1258	LUAD	6	13	M692	BRF1,AKT1	NA	0.903712	0.523862
c90	M798	READ	4	10	M206	KIAA0284	NA	0.979663	0.963487
c91	M1116	BRCA	5	12	M524	RBM42,LIN37	NA	1.12461	0.496246
c91	M389	ESCA	3	30	M58	RBM42,COX6B1	NA	1.27565	0.386529
c91	M174	LUAD	4	17	M26	POLR2I	NA	1.20702	0.236433
c91	M1382	OV	7	18	M765		NA	1.14084	0.381858
c91	M446	SARC	4	12	M75	COX6B1,RBM42	NA	0.958352	0.837854
c92	M236	BRCA	3	25	M22	SMEK1	CELLULAR_RESPONSE_TO_HEAT	1.24516	0.206771
c92	M804	BRCA	4	10	M236	BAG5	NA	0.939926	0.719407
c92	M1259	LUAD	6	14	M692		NA	0.965284	0.824106
c92	M766	LUSC	5	14	M218		NA	1.06982	0.661882
c92	M401	UCS	3	17	M61	PPP2R5C	REGULATION_OF_MRNA_3_END_PROCESSING	0.979336	0.951103
c93	M549	BRCA	4	26	M133	ZNF446,ZBTB45	NA	0.946116	0.748535
c93	M186	ESCA	3	11	M24	ZBTB45,ZNF446	NA	0.851253	0.570839
c93	M603	OV	5	17	M345	ZBTB45	NA	0.873613	0.375562
c93	M1066	SARC	4	11	M368		NA	1.19678	0.387985
c93	M72	UCS	2	29	M2	MZF1,ZNF446	NA	1.32295	0.417311
c94	M1393	CESC	4	15	M716	PDS5A,DHX15	NA	1.02131	0.935029
c94	M716	CESC	3	26	M128	PDS5A,SLC30A9	NA	1.0341	0.896872
c94	M774	LUAD	5	12	M227	UBE2K	NA	0.923142	0.613788
c94	M775	LUSC	5	19	M223	RFC1,SLC30A9	NA	1.06644	0.676615
c94	M525	MESO	3	17	M77	PDS5A,UBE2K	NA	0.711075	0.170627
c95	M1170	ESCA	4	19	M399	BRWD1,DYRK1A	NA	0.843276	0.545019
c95	M957	KICH	5	16	M333	USP16	NA	0.445406	0.252912
c95	M537	LIHC	4	18	M103	RNF160	NA	0.820888	0.276898
c95	M751	LUAD	5	17	M225	MORC3	RESPONSE_TO_INTERFERON_ALPHA	0.780406	0.12187
c95	M638	OV	5	21	M345		NA	1.07645	0.626747
c96	M443	GBM	5	23	M88	CXCR1	KILLING_OF_CELLS_OF_OTHER_ORGANISM	1.26287	0.227664
c96	M187	KIRC	5	11	M21	CXCR1	NA	0.999305	0.996357
c96	M496	KIRP	5	16	M79	CXCR1,FCGR3B	CELL_CHEMOTAXIS	1.02238	0.942508
c96	M267	LUSC	5	11	M30	CXCR1	NA	1.07472	0.64232
c96	M1134	STAD	7	17	M625	CXCR1	CELL_CHEMOTAXIS	1.13623	0.462405
c97	M179	LUAD	4	13	M27	GPATCH1	NA	1.41069	0.0315677
c97	M705	LUSC	5	26	M198	LSM14A,GPATCH1	NA	0.926555	0.621561
c97	M1383	OV	7	31	M765	ANKRD27	NA	1.0525	0.734594
c97	M1945	OV	8	23	M1383	ANKRD27	NA	1.09863	0.533065
c97	M2146	OV	9	14	M1945		NA	1.13622	0.396493
c98	M1249	BLCA	5	12	M553	ZNF615	NA	0.802692	0.153739
c98	M743	BRCA	4	11	M207	ZNF615	NA	0.927781	0.663774
c98	M651	HNSC	5	10	M142	ZNF615	NA	0.80978	0.129013
c98	M1419	LUSC	6	12	M690	ZNF613	NA	1.13022	0.428017
c99	M1382	BLCA	5	10	M688	PDCD11	NA	1.19972	0.234791
c99	M487	CESC	3	12	M44	PDCD11	NA	1.11442	0.675776
c99	M607	LIHC	4	12	M133	PDCD11	NA	1.40049	0.063215
c99	M788	UCEC	4	12	M268	PDCD11	NA	1.47676	0.0793089
